# Supplementary material for: Sulforaphane reduces obesity by reversing leptin resistance
Source: eLife. 2022 Mar 24;11:e67368. doi: 10.7554/eLife.67368 (PMC8947770; doi:10.7554/eLife.67368)
Supplement: Supplementary file 1. — The highest transcriptional changes were detected in the liver, and the least number of transcriptional changes were observed in the hypothalamus. [file elife-67368-supp1.xlsx]

## Sheet: Hypothalamus
gene_id	H6	H7	H8	H9	H10	H1	H2	H3	H4	H5	log2FoldChange	pvalue	padj	gene_name	gene_chr	gene_start	gene_end	gene_strand	gene_length	gene_biotype	gene_description	tf_family	H6_readcount	H7_readcount	H8_readcount	H9_readcount	H10_readcount	H1_readcount	H2_readcount	H3_readcount	H4_readcount	H5_readcount	H6_fpkm	H7_fpkm	H8_fpkm	H9_fpkm	H10_fpkm	H1_fpkm	H2_fpkm	H3_fpkm	H4_fpkm	H5_fpkm
ENSMUSG00000073060	2.88382	2.94273	0.878925	1.97926	1.04016	0	1.00602	0	0	0	2.78798	0.0411643	1	Zxda	X	94795563	94798183	-	2621	unprocessed_pseudogene	zinc finger, X-linked, duplicated A [Source:MGI Symbol;Acc:MGI:1921689]	-	3	3	1	2	1	0	1	0	0	0	0.0495207	0.0499168	0.0149019	0.0336737	0.0176815	0	0.0170293	0	0	0
ENSMUSG00000039671	2571.41	2613.14	2679.84	2621.53	2872.92	2408.13	2385.27	2537.7	2490.45	2596.29	0.105176	0.0189804	0.793115	Zmynd8	2	165784152	165899016	-	11031	protein_coding	zinc finger, MYND-type containing 8 [Source:MGI Symbol;Acc:MGI:1918025]	-	2675	2664	3049	2649	2762	2368	2371	2501	2306	2576	10.4916	10.532	10.7957	10.5973	11.6036	9.66213	9.59359	10.2635	9.97248	10.4131
ENSMUSG00000022361	1068.94	1209.46	1181.27	1220.21	1308.52	1093.22	1119.7	1140.49	1023.83	1110.68	0.125112	0.035817	0.883787	Zhx1	15	58047003	58076541	-	6031	protein_coding	zinc fingers and homeoboxes 1 [Source:MGI Symbol;Acc:MGI:109271]	Homeobox	1112	1233	1344	1233	1258	1075	1113	1124	948	1102	7.97715	8.91593	8.704	9.02197	9.66666	8.02278	8.23703	8.43673	7.49856	8.14785
ENSMUSG00000022306	215.325	239.342	227.642	201.884	261.08	180	214.282	202.934	191.158	158.237	0.274068	0.011266	0.674665	Zfpm2	15	40655035	41104592	+	9536	protein_coding	zinc finger protein, multitype 2 [Source:MGI Symbol;Acc:MGI:1334444]	zf-C2H2	224	244	259	204	251	177	213	200	177	157	1.01628	1.11588	1.06082	0.944042	1.21981	0.835436	0.996961	0.949426	0.885454	0.734149
ENSMUSG00000092260	72.0955	67.6827	72.9508	77.191	88.4134	64.0678	62.3731	56.8216	60.4792	58.4568	0.322131	0.0384249	0.891126	Zfp963	8	69741639	69749970	-	2299	protein_coding	zinc finger protein 963 [Source:MGI Symbol;Acc:MGI:4867078]	zf-C2H2	75	69	83	78	85	63	62	56	56	58	1.41142	1.30889	1.41009	1.49721	1.71343	1.23341	1.2037	1.10267	1.162	1.12497
ENSMUSG00000072774	35.5671	22.5609	32.5202	42.554	36.4055	49.8305	39.2347	47.6896	50.7593	54.4253	-0.513409	0.0156078	0.74741	Zfp951	5	104813169	104860070	-	4730	protein_coding	zinc finger protein 951 [Source:MGI Symbol;Acc:MGI:2441896]	zf-C2H2	37	23	37	43	35	49	39	47	47	54	0.338433	0.21206	0.305527	0.401176	0.34292	0.466274	0.368017	0.449815	0.474019	0.509077
ENSMUSG00000031374	573.88	496.34	642.494	642.269	727.07	416.949	418.503	565.172	523.793	601.702	0.286815	0.0145214	0.719163	Zfp92	X	73411096	73428385	+	6744	protein_coding	zinc finger protein 92 [Source:MGI Symbol;Acc:MGI:108094]	zf-C2H2	597	506	731	649	699	410	416	557	485	597	3.82992	3.27209	4.23359	4.24673	4.80336	2.73635	2.75322	3.73882	3.4307	3.94737
ENSMUSG00000046792	382.587	321.738	301.471	298.868	340.132	366.101	379.269	357.165	400.675	356.788	-0.17761	0.036778	0.885095	Zfp787	7	6131491	6155997	-	5443	protein_coding	zinc finger protein 787 [Source:MGI Symbol;Acc:MGI:1914359]	zf-C2H2	398	328	343	302	327	360	377	352	371	354	3.16357	2.62802	2.4613	2.44848	2.78416	2.97694	3.09149	2.92753	3.25158	2.90012
ENSMUSG00000034429	160.533	163.812	120.413	126.672	152.903	185.085	186.113	159.304	177.118	165.292	-0.271176	0.0211401	0.819153	Zfp707	15	75969123	75975868	+	3493	protein_coding	zinc finger protein 707 [Source:MGI Symbol;Acc:MGI:1916270]	zf-C2H2	167	167	137	128	147	182	185	157	164	164	2.06848	2.08502	1.5319	1.61711	1.95031	2.34519	2.36395	2.03469	2.23977	2.09361
ENSMUSG00000050064	228.783	232.475	214.458	233.552	215.313	168.813	195.167	216.125	170.638	204.599	0.23406	0.01795	0.774253	Zfp697	3	98382461	98753812	+	8276	protein_coding	zinc finger protein 697 [Source:MGI Symbol;Acc:MGI:2139736]	zf-C2H2	238	237	244	236	207	166	194	213	158	203	1.2442	1.24888	1.15154	1.2584	1.15914	0.902804	1.04628	1.16508	0.910742	1.09377
ENSMUSG00000024420	425.844	472.798	471.104	487.887	441.027	408.813	373.233	443.412	434.154	420.285	0.144957	0.0475004	0.921416	Zfp521	18	13687013	13972733	-	6152	protein_coding	zinc finger protein 521 [Source:MGI Symbol;Acc:MGI:95459]	zf-C2H2	443	482	536	493	424	402	371	437	402	417	3.11544	3.41683	3.40296	3.53637	3.194	2.94114	2.69167	3.2156	3.11723	3.02253
ENSMUSG00000064264	442.186	412.963	444.736	442.364	478.473	514.576	465.786	474.867	584.272	488.82	-0.186658	0.0155432	0.74692	Zfp428	7	24507006	24515682	+	1308	protein_coding	zinc finger protein 428 [Source:MGI Symbol;Acc:MGI:1916463]	-	460	421	506	447	460	506	463	468	541	485	15.2154	14.0368	15.1096	15.0809	16.298	17.412	15.7993	16.197	19.731	16.5343
ENSMUSG00000014198	16.3417	29.4273	29.8834	16.8237	21.8433	36.6101	42.2527	25.3668	28.0796	38.2993	-0.574786	0.031672	0.856052	Zfp385c	11	100627543	100692455	-	3101	protein_coding	zinc finger protein 385C [Source:MGI Symbol;Acc:MGI:3608347]	-	17	30	34	17	21	36	42	25	26	38	0.237181	0.421903	0.428239	0.241922	0.313836	0.522524	0.604522	0.364952	0.399973	0.546427
ENSMUSG00000049764	490.25	504.187	541.418	570.026	606.412	481.017	438.624	536.762	481.674	489.828	0.159129	0.0422555	0.905032	Zfp280b	10	76032650	76043234	+	5224	protein_coding	zinc finger protein 280B [Source:MGI Symbol;Acc:MGI:1927865]	-	510	514	616	576	583	473	436	529	446	486	4.22376	4.29094	4.6056	4.86572	5.17191	4.07534	3.72519	4.58406	4.07278	4.14843
ENSMUSG00000071256	84.5921	102.995	102.834	95.994	95.6945	74.2372	82.4935	68.9977	78.839	72.5671	0.35534	0.0108385	0.659654	Zfp213	17	23556767	23564238	-	2686	protein_coding	zinc finger protein 213 [Source:MGI Symbol;Acc:MGI:3053094]	zf-C2H2	88	105	117	97	92	73	82	68	73	72	1.41745	1.70481	1.70133	1.59365	1.58733	1.22327	1.36261	1.14604	1.29651	1.1953
ENSMUSG00000039686	4711.2	4884.93	5001.96	4887.78	5182.07	4294.57	4372.15	4768.96	4473.3	4652.36	0.128702	0.00245597	0.422694	Zer1	2	30097283	30124585	-	9784	protein_coding	zyg-11 related, cell cycle regulator [Source:MGI Symbol;Acc:MGI:2442511]	-	4901	4980	5691	4939	4982	4223	4346	4700	4142	4616	21.6721	22.1976	22.7186	22.2767	23.5979	19.4272	19.8261	21.746	20.1954	21.0378
ENSMUSG00000029427	590.222	598.354	642.494	684.823	722.91	552.203	543.25	555.026	605.872	600.695	0.180528	0.0124155	0.693745	Zcchc8	5	123698294	123721100	-	5251	protein_coding	zinc finger, CCHC domain containing 8 [Source:MGI Symbol;Acc:MGI:1917900]	-	614	610	731	692	695	543	540	547	561	596	5.05893	5.06618	5.43731	5.81556	6.13378	4.6544	4.59004	4.71566	5.09659	5.06122
ENSMUSG00000047749	211.48	209.914	225.005	234.542	253.799	164.746	172.029	210.037	186.838	189.481	0.296854	0.00338666	0.463546	Zc3hav1l	6	38287396	38299259	-	6536	protein_coding	zinc finger CCCH-type, antiviral 1-like [Source:MGI Symbol;Acc:MGI:2443387]	-	220	214	256	237	244	162	171	207	173	188	1.45627	1.42789	1.52981	1.60016	1.73007	1.1156	1.16775	1.43369	1.26268	1.28262
ENSMUSG00000006310	33.6446	39.2363	23.731	27.7096	36.4055	48.8135	56.337	35.5135	38.8795	41.3229	-0.464287	0.0391077	0.894688	Zbtb32	7	30589681	30598909	-	2357	protein_coding	zinc finger and BTB domain containing 32 [Source:MGI Symbol;Acc:MGI:1891838]	ZBTB	35	40	27	28	35	48	56	35	36	41	0.642452	0.740105	0.447418	0.524235	0.688167	0.916616	1.06046	0.672211	0.728621	0.775666
ENSMUSG00000026775	1675.5	1740.13	1764	1725.91	1694.42	1470.51	1626.73	1665.08	1598.38	1631.75	0.10586	0.0211586	0.819153	Yme1l1	2	23156369	23199260	+	8009	protein_coding	YME1-like 1 (S. cerevisiae) [Source:MGI Symbol;Acc:MGI:1351651]	-	1743	1774	2007	1744	1629	1446	1617	1641	1480	1619	9.41568	9.6598	9.78764	9.60939	9.42602	8.12636	9.01149	9.27529	8.81541	9.01403
ENSMUSG00000022792	369.129	367.841	375.301	363.194	358.854	347.796	350.094	294.255	319.676	322.521	0.166775	0.0269639	0.845499	Yars2	16	16302965	16309640	+	3149	protein_coding	tyrosyl-tRNA synthetase 2 (mitochondrial) [Source:MGI Symbol;Acc:MGI:1917370]	-	384	375	427	367	345	342	348	290	296	320	5.27583	5.1934	5.2962	5.14305	5.07729	4.88832	4.93255	4.16891	4.48413	4.53135
ENSMUSG00000034667	1889.86	1901.98	1945.94	1956.5	2045.99	1667.8	1695.14	1955.27	1862.98	1831.31	0.111985	0.0333965	0.860175	Xpot	10	121587380	121626332	-	6033	protein_coding	exportin, tRNA (nuclear export receptor for tRNAs) [Source:MGI Symbol;Acc:MGI:1920442]	-	1966	1939	2214	1977	1967	1640	1685	1927	1725	1817	14.0988	14.0164	14.3335	14.4611	15.1097	12.2354	12.4661	14.4592	13.64	13.4299
ENSMUSG00000022100	1720.68	1826.45	1787.73	1961.44	1991.9	1707.46	1632.77	1833.51	1645.9	1750.68	0.11551	0.0353868	0.879496	Xpo7	14	70654246	70766628	-	19005	protein_coding	exportin 7 [Source:MGI Symbol;Acc:MGI:1929705]	-	1790	1862	2034	1982	1915	1679	1623	1807	1524	1737	4.07491	4.27272	4.18015	4.60218	4.66967	3.97639	3.81167	4.30415	3.82539	4.07552
ENSMUSG00000067150	1271.77	1375.23	1286.75	1248.91	1368.85	1075.93	1196.16	1210.5	1298.14	1225.58	0.125377	0.0296121	0.853645	Xpo5	17	46202782	46243598	+	6859	protein_coding	exportin 5 [Source:MGI Symbol;Acc:MGI:1913789]	-	1323	1402	1464	1262	1316	1058	1189	1193	1202	1216	8.3451	8.91415	8.3366	8.11944	8.89161	6.94274	7.73723	7.87367	8.35993	7.90539
ENSMUSG00000020290	1834.11	2016.75	2148.09	1930.77	2138.56	1832.54	1787.69	1865.98	1835.98	1813.17	0.140397	0.00628477	0.530331	Xpo1	11	23256041	23298249	+	7181	protein_coding	exportin 1 [Source:MGI Symbol;Acc:MGI:2144013]	-	1908	2056	2444	1951	2056	1802	1777	1839	1700	1799	11.4954	12.4862	13.2931	11.9895	13.2686	11.2947	11.045	11.593	11.2934	11.1711
ENSMUSG00000015342	365.284	362.936	383.211	418.613	483.673	319.322	311.866	339.915	340.196	360.82	0.266882	0.00355313	0.475108	Xk	X	9272756	9313250	+	5076	protein_coding	X-linked Kx blood group [Source:MGI Symbol;Acc:MGI:103569]	-	380	370	436	423	465	314	310	335	315	358	3.23888	3.17887	3.35485	3.67745	4.24538	2.78429	2.72587	2.98759	2.96038	3.14494
ENSMUSG00000024066	104.779	115.747	97.5607	130.631	135.221	147.458	133.8	143.069	133.918	181.418	-0.344971	0.00997319	0.63551	Xdh	17	73883895	73950196	-	9175	protein_coding	xanthine dehydrogenase [Source:MGI Symbol;Acc:MGI:98973]	-	109	118	111	132	130	145	133	141	124	180	0.513988	0.560879	0.472526	0.634886	0.656633	0.711325	0.647009	0.695681	0.644725	0.874817
ENSMUSG00000020811	1668.77	1593	1568	1594.29	1448.94	1894.58	1751.48	1774.66	1765.78	1714.4	-0.176711	0.000371234	0.189799	Wscd1	11	71749920	71789647	+	4287	protein_coding	WSC domain containing 1 [Source:MGI Symbol;Acc:MGI:2448493]	-	1736	1624	1784	1611	1393	1863	1741	1749	1635	1701	17.5198	16.5206	16.2536	16.5832	15.0585	19.5598	18.1263	18.4686	18.1938	17.693
ENSMUSG00000028173	743.065	732.739	551.965	585.86	481.593	898.982	913.464	640.258	670.671	685.356	-0.299282	0.0199241	0.815612	Wls	3	159839672	159938664	+	8792	protein_coding	wntless WNT ligand secretion mediator [Source:MGI Symbol;Acc:MGI:1915401]	-	773	747	628	592	463	884	908	631	621	680	3.80386	3.70532	2.78985	2.9714	2.4405	4.52554	4.6096	3.24892	3.36948	3.44883
ENSMUSG00000020218	91.321	77.4918	100.197	83.1288	64.4898	130.169	60.3611	105.526	126.358	129.008	-0.40102	0.0405661	0.903243	Wif1	10	121033960	121100650	+	2427	protein_coding	Wnt inhibitory factor 1 [Source:MGI Symbol;Acc:MGI:1344332]	-	95	79	114	84	62	128	60	104	117	128	1.6935	1.41955	1.83461	1.52734	1.18388	2.37381	1.10343	1.93982	2.29972	2.35175
ENSMUSG00000039137	1509.2	1358.56	1567.12	1556.69	1632.01	1292.54	1290.72	1337.34	1381.3	1475.53	0.169702	0.0046465	0.486127	Whrn	4	63414910	63495991	-	7337	protein_coding	whirlin [Source:MGI Symbol;Acc:MGI:2682003]	-	1570	1385	1783	1573	1569	1271	1283	1318	1279	1464	9.25793	8.23236	9.49165	9.46102	9.91037	7.7971	7.805	8.13194	8.31593	8.89761
ENSMUSG00000000983	3.84509	1.96182	1.75785	1.97926	8.32126	14.2373	11.0662	5.07336	12.9598	3.02363	-1.39203	0.02502	1	Wfdc18	11	83709015	83711348	+	1220	protein_coding	WAP four-disulfide core domain 18 [Source:MGI Symbol;Acc:MGI:107506]	-	4	2	2	2	8	14	11	5	12	3	0.141851	0.0714929	0.0640293	0.0723432	0.303889	0.516505	0.402437	0.185527	0.469224	0.109651
ENSMUSG00000023336	89.3985	113.785	82.6189	71.2533	113.377	158.644	107.644	98.4232	133.918	101.796	-0.353253	0.0414668	0.905032	Wfdc1	8	119666365	119688222	+	1539	protein_coding	WAP four-disulfide core domain 1 [Source:MGI Symbol;Acc:MGI:1915116]	-	93	116	94	72	109	156	107	97	124	101	2.61443	3.28709	2.3856	2.06453	3.28226	4.56238	3.1032	2.85319	3.84363	2.9264
ENSMUSG00000042660	147.075	150.079	170.511	146.465	144.582	167.797	182.089	176.553	181.438	191.497	-0.243127	0.0179945	0.774253	Wdr55	18	36760239	36763708	+	1498	protein_coding	WD repeat domain 55 [Source:MGI Symbol;Acc:MGI:1915186]	-	153	153	194	148	139	165	181	174	168	190	4.41888	4.45423	5.05823	4.35991	4.3002	4.95767	5.39301	5.25817	5.35003	5.65578
ENSMUSG00000014547	639.247	684.674	704.019	765.973	767.637	619.322	654.918	644.317	587.512	683.34	0.158161	0.0223643	0.826383	Wdfy2	14	62837678	62961509	+	9185	protein_coding	WD repeat and FYVE domain containing 2 [Source:MGI Symbol;Acc:MGI:2442811]	-	665	698	801	774	738	609	651	635	544	678	3.13238	3.31413	3.40614	3.71868	3.7236	2.98431	3.16349	3.12962	2.82539	3.29156
ENSMUSG00000001930	548.887	612.087	421.005	350.329	408.782	357.966	348.082	234.389	248.397	231.812	0.720504	0.000462024	0.211201	Vwf	6	125546774	125686679	+	16064	protein_coding	Von Willebrand factor [Source:MGI Symbol;Acc:MGI:98941]	-	571	624	479	354	393	352	346	231	230	230	1.53785	1.69404	1.16464	0.972472	1.13377	0.986268	0.961362	0.650962	0.683019	0.638447
ENSMUSG00000028753	1280.42	952.462	1185.67	1252.87	1310.6	1013.9	1089.52	1108.02	1070.27	1062.3	0.162518	0.0363313	0.885095	Vwa5b1	4	138565360	138635884	-	7805	protein_coding	von Willebrand factor A domain containing 5B1 [Source:MGI Symbol;Acc:MGI:1922968]	-	1332	971	1349	1266	1260	997	1083	1092	991	1054	7.38353	5.42549	6.75069	7.15795	7.4814	5.74947	6.19327	6.33355	6.05703	6.02169
ENSMUSG00000070604	118.237	107.9	93.166	95.0044	120.658	91.5254	78.4694	82.1885	80.999	91.7168	0.329692	0.0170451	0.774253	Vsig10l	7	43463151	43472019	+	4075	protein_coding	V-set and immunoglobulin domain containing 10 like [Source:MGI Symbol;Acc:MGI:1922940]	-	123	110	106	96	116	90	78	81	75	91	1.3059	1.17722	1.01598	1.03961	1.31922	0.994079	0.854342	0.899818	0.877996	0.995782
ENSMUSG00000027411	1067.01	965.214	966.817	1081.66	1032.88	1105.42	1078.45	1114.11	1083.23	1117.74	-0.105417	0.0409743	0.905032	Vps16	2	130424339	130444269	+	3727	protein_coding	VSP16 CORVET/HOPS core subunit [Source:MGI Symbol;Acc:MGI:2136772]	-	1110	984	1100	1093	993	1087	1072	1098	1003	1109	12.8853	11.5141	11.5277	12.9416	12.3474	13.1273	12.8381	13.3365	12.8381	13.2685
ENSMUSG00000037428	8381.35	7567.71	8609.07	7841.82	9389.51	5945.08	6058.24	7448.71	8575.09	8500.43	0.194181	0.0485518	0.924604	Vgf	5	137026392	137033351	+	2973	protein_coding	VGF nerve growth factor inducible [Source:MGI Symbol;Acc:MGI:1343180]	-	8719	7715	9795	7924	9027	5846	6022	7341	7940	8434	126.883	113.171	128.682	117.619	140.713	88.5054	90.4088	111.778	127.404	126.5
ENSMUSG00000027962	423.922	369.803	392	410.696	369.256	434.237	432.588	404.854	530.273	414.237	-0.171701	0.0448356	0.913452	Vcam1	3	116109949	116129688	-	8870	protein_coding	vascular cell adhesion molecule 1 [Source:MGI Symbol;Acc:MGI:98926]	-	441	377	446	415	355	427	430	399	491	411	2.15104	1.85358	1.9639	2.06468	1.85477	2.16676	2.16376	2.03632	2.64069	2.06618
ENSMUSG00000025437	1292.91	1416.43	1414.19	1327.09	1396.93	1265.08	1274.62	1356.62	1238.74	1265.89	0.0972509	0.0456049	0.916309	Usp33	3	152346478	152393617	+	9675	protein_coding	ubiquitin specific peptidase 33 [Source:MGI Symbol;Acc:MGI:2159711]	-	1345	1444	1609	1341	1343	1244	1267	1337	1147	1256	6.01456	6.50892	6.49552	6.11653	6.43295	5.78729	5.84508	6.25573	5.6555	5.78881
ENSMUSG00000022867	366.245	407.077	392	411.686	413.983	569.491	400.395	482.984	426.594	410.206	-0.20214	0.0366693	0.885095	Usp25	16	77013706	77116780	+	5201	protein_coding	ubiquitin specific peptidase 25 [Source:MGI Symbol;Acc:MGI:1353655]	-	381	415	446	416	398	560	398	476	395	407	3.16935	3.4798	3.34932	3.52967	3.54635	4.84626	3.41555	4.14302	3.62301	3.48946
ENSMUSG00000038007	270.118	256.998	277.74	222.666	285.003	155.593	186.113	201.92	207.357	176.378	0.502228	1.86861e-06	0.00541367	Acer2	4	86874396	86934822	+	7159	protein_coding	alkaline ceramidase 2 [Source:MGI Symbol;Acc:MGI:1920932]	-	281	262	316	225	274	153	185	199	192	175	1.69819	1.59603	1.72403	1.38694	1.77371	0.961933	1.15341	1.25834	1.2794	1.09002
ENSMUSG00000058239	931.474	752.357	896.503	884.728	875.813	989.491	981.873	940.601	1008.71	1010.9	-0.183677	0.00296308	0.447299	Usf2	7	30945248	30956803	-	2651	protein_coding	upstream transcription factor 2 [Source:MGI Symbol;Acc:MGI:99961]	bHLH	969	767	1020	894	842	973	976	927	934	1003	15.8142	12.6177	15.0279	14.8818	14.7193	16.52	16.4325	15.8295	16.8072	16.871
ENSMUSG00000044894	1696.65	1525.31	1484.5	1452.78	1390.69	1663.73	1681.06	1539.26	1864.06	1641.83	-0.15173	0.0189565	0.793115	Uqcrq	11	53427922	53430831	-	1831	protein_coding	ubiquinol-cytochrome c reductase, complex III subunit VII [Source:MGI Symbol;Acc:MGI:107807]	-	1765	1555	1689	1468	1337	1636	1671	1517	1726	1629	41.7051	37.0369	36.0288	35.3806	33.8398	40.2162	40.7336	37.5055	44.9688	39.6719
ENSMUSG00000024208	842.076	782.765	692.593	707.585	692.745	877.627	842.037	751.872	934.188	842.585	-0.192124	0.0106501	0.655797	Uqcc2	17	27122663	27133916	-	837	protein_coding	ubiquinol-cytochrome c reductase complex assembly factor 2 [Source:MGI Symbol;Acc:MGI:1914517]	-	876	798	788	715	666	863	837	741	865	836	45.2805	41.5786	36.7714	37.6971	36.8752	46.4078	44.6339	40.0765	49.3003	44.5381
ENSMUSG00000063626	862.263	694.483	1017.79	928.272	951.744	718.983	781.676	791.444	789.47	789.167	0.203055	0.0200349	0.815612	Unc5d	8	28646717	29219636	-	9220	protein_coding	unc-5 netrin receptor D [Source:MGI Symbol;Acc:MGI:2389364]	-	897	708	1158	938	915	707	777	780	731	783	4.20915	3.34885	4.90554	4.48952	4.59913	3.45139	3.76145	3.82967	3.78221	3.78688
ENSMUSG00000043592	13.4578	13.7327	8.78925	12.8652	16.6425	26.4407	17.1023	25.3668	23.7597	13.1024	-0.697908	0.0336299	0.860175	Unc5cl	17	48454901	48539714	+	3224	protein_coding	unc-5 family C-terminal like [Source:MGI Symbol;Acc:MGI:1923839]	-	14	14	10	13	16	26	17	25	22	13	0.187874	0.189376	0.121147	0.177941	0.229991	0.362981	0.235352	0.351028	0.325527	0.179804
ENSMUSG00000001228	15.3804	15.6945	14.9417	12.8652	17.6827	22.3729	28.1685	21.3081	33.4796	18.1418	-0.688136	0.0195266	0.808167	Uhrf1	17	56303321	56323486	+	4259	protein_coding	ubiquitin-like, containing PHD and RING finger domains, 1 [Source:MGI Symbol;Acc:MGI:1338889]	-	16	16	17	13	17	22	28	21	31	18	0.162534	0.163834	0.155901	0.134699	0.184981	0.232499	0.293437	0.223208	0.347227	0.188458
ENSMUSG00000032854	792.09	1018.18	834.979	944.106	771.797	1266.1	1052.29	943.645	1036.79	963.53	-0.271002	0.00361694	0.476313	Ugt8a	3	125865271	125938619	-	4536	protein_coding	UDP galactosyltransferase 8A [Source:MGI Symbol;Acc:MGI:109522]	-	824	1038	950	954	742	1245	1046	930	960	956	7.85935	9.97969	8.18011	9.28117	7.58082	12.3538	10.2926	9.28127	10.0962	9.398
ENSMUSG00000031634	564.268	562.061	515.05	544.296	479.513	585.762	618.701	575.319	650.152	549.293	-0.159921	0.0237707	0.839298	Ufsp2	8	45975528	45996958	+	4407	protein_coding	UFM1-specific peptidase 2 [Source:MGI Symbol;Acc:MGI:1913679]	-	587	573	586	550	461	576	615	567	602	545	5.76272	5.67028	5.19354	5.50741	4.84778	5.88282	6.22869	5.82421	6.51647	5.51447
ENSMUSG00000028243	590.222	626.801	703.14	659.093	697.946	565.423	580.472	554.011	601.552	574.49	0.188853	0.00416278	0.486127	Ubxn2b	4	6191098	6221688	+	6642	protein_coding	UBX domain protein 2B [Source:MGI Symbol;Acc:MGI:1915303]	-	614	639	800	666	671	556	577	546	557	570	3.99947	4.19561	4.70435	4.42489	4.68176	3.76775	3.87741	3.72127	4.00051	3.82672
ENSMUSG00000066036	6383.82	7327.39	7444.49	7055.06	7844.87	6366.1	6679.96	6771.92	5839.48	7214.38	0.133268	0.0379915	0.887644	Ubr4	4	139352609	139489588	+	17997	protein_coding	ubiquitin protein ligase E3 component n-recognin 4 [Source:MGI Symbol;Acc:MGI:1916366]	-	6641	7470	8470	7129	7542	6260	6640	6674	5407	7158	15.9649	18.1014	18.382	17.4806	19.421	15.656	16.4677	16.7874	14.3323	17.7355
ENSMUSG00000050148	5095.71	4848.63	5160.17	5070.86	5138.38	4718.64	4612.59	4916.09	4711.98	4872.08	0.0870812	0.0122406	0.693529	Ubqln2	X	153498227	153501570	+	3344	protein_coding	ubiquilin 2 [Source:MGI Symbol;Acc:MGI:1860283]	-	5301	4943	5871	5124	4940	4640	4585	4845	4363	4834	68.5842	64.464	68.5732	67.6193	68.4614	62.4536	61.1981	65.5881	62.2412	64.4601
ENSMUSG00000090137	290.305	283.483	238.189	254.335	228.835	322.373	287.721	274.976	304.556	296.316	-0.197978	0.0312899	0.856052	Uba52	8	70508263	70510801	-	1498	protein_coding	ubiquitin A-52 residue ribosomal protein fusion product 1 [Source:MGI Symbol;Acc:MGI:98887]	-	302	289	271	257	220	317	286	271	282	294	8.72223	8.41354	7.06588	7.57092	6.80607	9.52474	8.52156	8.18945	8.98041	8.75157
ENSMUSG00000005994	9.61274	7.84727	2.63677	0.989629	2.08032	48.8135	11.0662	1.01467	6.47992	9.07089	-1.72199	0.0245457	0.845499	Tyrp1	4	80834123	80851719	+	2828	protein_coding	tyrosinase-related protein 1 [Source:MGI Symbol;Acc:MGI:98881]	-	10	8	3	1	2	48	11	1	6	9	0.152987	0.123368	0.0414334	0.0156044	0.0327745	0.763955	0.173611	0.0160073	0.101212	0.14191
ENSMUSG00000028367	1095.85	976.004	864.862	954.002	893.496	1022.03	1139.82	970.027	1185.82	1047.18	-0.165154	0.0287425	0.845499	Txn1	4	57943373	57956411	-	1051	protein_coding	thioredoxin 1 [Source:MGI Symbol;Acc:MGI:98874]	-	1140	995	984	964	859	1005	1133	956	1098	1039	46.9283	41.287	36.568	40.4764	37.877	43.0397	48.1163	41.1768	49.8378	44.0822
ENSMUSG00000056579	2020.6	2064.81	2192.92	2217.76	2193.69	2008.47	2009.02	2047.61	2024.97	1878.68	0.100812	0.0253958	0.845499	Tug1	11	3639785	3649673	-	9734	antisense	taurine upregulated gene 1 [Source:MGI Symbol;Acc:MGI:2144114]	-	2102	2105	2495	2241	2109	1975	1997	2018	1875	1864	9.34273	9.43091	10.0112	10.1596	10.0409	9.13233	9.15696	9.38485	9.18901	8.53897
ENSMUSG00000020513	117.275	147.136	161.722	134.59	141.461	129.152	101.608	111.614	120.958	112.882	0.287271	0.0222342	0.826383	Tubd1	11	86544991	86567360	+	2070	protein_coding	tubulin, delta 1 [Source:MGI Symbol;Acc:MGI:1891826]	-	122	150	184	136	136	127	101	110	112	112	2.54989	3.16019	3.47181	2.89932	3.04477	2.76146	2.17779	2.40558	2.58111	2.41267
ENSMUSG00000001525	10042.4	8847.8	8943.94	9503.41	8989.04	9126.1	10041.1	9780.43	10640	10054.6	-0.0996883	0.0483374	0.924604	Tubb5	17	35833921	35838306	-	3327	protein_coding	tubulin, beta 5 class I [Source:MGI Symbol;Acc:MGI:107812]	-	10447	9020	10176	9603	8642	8974	9981	9639	9852	9976	135.854	118.235	119.463	127.374	120.378	121.406	133.902	131.152	141.264	133.707
ENSMUSG00000036752	4861.16	4812.34	4793.66	5134.19	5083.25	5259.66	5243.36	5086.55	5543.57	5284.3	-0.0979584	0.00969513	0.63551	Tubb4b	2	25222160	25224702	-	2088	protein_coding	tubulin, beta 4B class IVB [Source:MGI Symbol;Acc:MGI:1915472]	-	5057	4906	5454	5188	4887	5172	5212	5013	5133	5243	104.784	102.468	102.022	109.647	108.467	111.489	111.414	108.684	117.273	111.97
ENSMUSG00000062591	14961.3	15029.5	12028.1	14463.4	11844.3	16166.4	17314.6	15361.1	16388.8	15264.3	-0.236465	0.00100664	0.252286	Tubb4a	17	57080066	57087782	-	2228	protein_coding	tubulin, beta 4A class IVA [Source:MGI Symbol;Acc:MGI:107848]	-	15564	15322	13685	14615	11387	15897	17211	15139	15175	15145	302.231	299.912	239.905	289.475	236.853	321.148	344.791	307.595	324.917	303.113
ENSMUSG00000062380	8665.88	8163.12	7455.04	8557.32	7442.33	8624.74	9508.88	8284.8	9381.84	8862.26	-0.148866	0.00928648	0.628017	Tubb3	8	123411424	123422015	+	1868	protein_coding	tubulin, beta 3 class III [Source:MGI Symbol;Acc:MGI:107813]	-	9015	8322	8482	8647	7155	8481	9452	8165	8687	8793	208.796	194.287	177.35	204.275	177.508	204.351	225.846	197.869	221.846	209.899
ENSMUSG00000072235	11692	10918.5	10420.5	11981.4	10139.5	12033.6	12902.2	11161.4	12365.8	11650	-0.124261	0.0266794	0.845499	Tuba1a	15	98949837	98953703	-	1803	protein_coding	tubulin, alpha 1A [Source:MGI Symbol;Acc:MGI:98869]	-	12163	11131	11856	12107	9748	11833	12825	11000	11450	11559	291.862	269.235	256.833	296.325	250.556	295.396	317.487	276.181	302.948	285.874
ENSMUSG00000034714	971.848	939.71	977.364	1000.51	923.66	1200	1039.22	1043.08	1078.91	1070.37	-0.174078	0.00167673	0.34928	Ttyh2	11	114675431	114720977	+	3739	protein_coding	tweety family member 2 [Source:MGI Symbol;Acc:MGI:2157091]	-	1011	958	1112	1011	888	1180	1033	1028	999	1062	11.6984	11.1739	11.616	11.9323	11.0063	14.2047	12.3313	12.4461	12.7459	12.6654
ENSMUSG00000030428	9655.03	10713.5	10493.5	10179.3	10440.1	9259.32	9543.08	9617.06	9612.96	9987.05	0.100428	0.00822572	0.608459	Ttyh1	7	4119408	4136708	+	6379	protein_coding	tweety family member 1 [Source:MGI Symbol;Acc:MGI:1889007]	-	10044	10922	11939	10286	10037	9105	9486	9478	8901	9909	68.1219	74.6694	73.1011	71.1576	72.9183	64.2441	66.3736	67.2607	66.5649	69.2672
ENSMUSG00000030276	861.301	1004.45	1260.38	805.558	961.106	804.406	718.297	783.327	720.351	781.104	0.362459	0.00031396	0.173106	Ttll3	6	113389260	113414587	+	5041	protein_coding	tubulin tyrosine ligase-like family, member 3 [Source:MGI Symbol;Acc:MGI:2141418]	-	896	1024	1434	814	924	791	714	772	667	775	7.68996	8.85883	11.1107	7.12583	8.49455	7.06262	6.32188	6.93263	6.31202	6.85545
ENSMUSG00000027650	463.334	461.027	439.462	472.053	487.834	369.152	420.515	420.074	384.475	427.34	0.199543	0.00462934	0.486127	Tti1	2	157981803	158028433	-	4129	protein_coding	TELO2 interacting protein 1 [Source:MGI Symbol;Acc:MGI:1922675]	-	482	470	500	477	469	363	418	414	356	424	5.0505	4.96416	4.7297	5.09801	5.26397	3.95701	4.51852	4.53892	4.11305	4.57901
ENSMUSG00000042734	1196.79	1277.14	1226.1	1279.59	1242.99	1097.29	1253.5	1181.08	1152.35	1088.51	0.108051	0.040075	0.900166	Ttc9	12	81631249	81667557	+	4778	protein_coding	tetratricopeptide repeat domain 9 [Source:MGI Symbol;Acc:MGI:1916730]	-	1245	1302	1395	1293	1195	1079	1246	1164	1067	1080	11.2734	11.8839	11.4035	11.9421	11.5906	10.1644	11.6396	11.0282	10.6531	10.0793
ENSMUSG00000044986	336.446	295.254	228.52	373.09	308.927	386.44	379.269	415.001	400.675	411.214	-0.371381	0.00056866	0.215179	Tst	15	78399556	78405907	-	3163	protein_coding	thiosulfate sulfurtransferase, mitochondrial [Source:MGI Symbol;Acc:MGI:98852]	-	350	301	260	377	297	380	377	409	371	408	4.78742	4.15012	3.21058	5.25981	4.35154	5.40742	5.31994	5.85358	5.59543	5.7519
ENSMUSG00000038679	325.872	394.325	306.745	345.38	306.847	421.017	405.425	336.871	356.395	387.025	-0.184099	0.0473169	0.919006	Trps1	15	50654752	50890463	-	13380	protein_coding	transcriptional repressor GATA binding 1 [Source:MGI Symbol;Acc:MGI:1927616]	zf-GATA	339	402	349	349	295	414	403	332	330	384	1.09617	1.31028	1.01877	1.15106	1.02177	1.39268	1.34435	1.12326	1.17657	1.27975
ENSMUSG00000036251	11.5353	17.6564	20.2153	16.8237	19.763	10.1695	12.0722	7.10271	8.63989	8.06301	0.900653	0.0125784	0.698563	Trpm8	1	88277661	88389293	+	4732	protein_coding	transient receptor potential cation channel, subfamily M, member 8 [Source:MGI Symbol;Acc:MGI:2181435]	-	12	18	23	17	19	10	12	7	8	8	0.109716	0.16589	0.189842	0.158537	0.186078	0.0951177	0.113188	0.0669654	0.08065	0.0753869
ENSMUSG00000038375	3125.1	3498.9	3064.81	3175.72	2923.88	3577.62	3572.37	3387.99	3424.64	3283.66	-0.127398	0.0134824	0.70848	Trp53inp2	2	155381059	155389850	+	5257	protein_coding	transformation related protein 53 inducible nuclear protein 2 [Source:MGI Symbol;Acc:MGI:1915978]	-	3251	3567	3487	3209	2811	3518	3551	3339	3171	3258	26.7554	29.5909	25.9073	26.9376	24.7804	30.1206	30.1493	28.7525	28.7751	27.6353
ENSMUSG00000043909	2998.21	3166.37	3616.78	3407.29	3672.8	3053.9	2979.82	3132.29	3054.2	3216.13	0.127379	0.0280865	0.845499	Trp53bp1	2	121193281	121271407	-	14164	protein_coding	transformation related protein 53 binding protein 1 [Source:MGI Symbol;Acc:MGI:1351320]	-	3119	3228	4115	3443	3531	3003	2962	3087	2828	3191	9.52713	9.93895	11.3473	10.727	11.5531	9.54279	9.33391	9.86616	9.52472	10.046
ENSMUSG00000025272	6249.24	6055.15	7232.67	7140.17	7221.82	5873.89	5843.96	6473.61	6302.8	6441.34	0.132	0.0287236	0.845499	Tro	X	150645304	150657583	-	7296	protein_coding	trophinin [Source:MGI Symbol;Acc:MGI:1928994]	-	6501	6173	8229	7215	6943	5776	5809	6380	5836	6391	38.5503	36.8981	44.0526	43.6394	44.1009	35.6327	35.537	39.5852	38.1583	39.0602
ENSMUSG00000033439	102.856	107.9	130.96	94.0147	107.136	132.203	130.782	119.731	129.598	139.087	-0.259938	0.0379051	0.887644	Trmt13	3	116581093	116614587	-	6134	protein_coding	tRNA methyltransferase 13 [Source:MGI Symbol;Acc:MGI:1925219]	-	107	110	149	95	103	130	130	118	120	138	0.754697	0.782063	0.948749	0.683451	0.778178	0.953906	0.945941	0.870834	0.933247	1.0032
ENSMUSG00000034317	263.389	359.993	292.682	337.463	282.923	415.932	329.974	366.297	300.236	373.922	-0.21825	0.0427336	0.905032	Trim59	3	69035288	69044755	-	3352	protein_coding	tripartite motif-containing 59 [Source:MGI Symbol;Acc:MGI:1914199]	-	274	367	333	341	272	409	328	361	278	371	3.53654	4.7748	3.88015	4.48929	3.76054	5.49193	4.36752	4.87529	3.9564	4.93538
ENSMUSG00000042766	1824.5	1827.43	1782.46	1719.97	1841.08	1605.76	1640.81	1684.36	1659.94	1616.63	0.132182	0.00119988	0.281858	Trim46	3	89234177	89246309	-	3792	protein_coding	tripartite motif-containing 46 [Source:MGI Symbol;Acc:MGI:2673000]	-	1898	1863	2028	1738	1770	1579	1631	1660	1537	1604	21.6551	21.4258	20.8886	20.226	21.6317	18.7422	19.1977	19.817	19.3359	18.862
ENSMUSG00000057143	78.8244	56.8927	53.6144	61.357	49.9276	86.4406	89.5356	74.0711	55.0793	79.6223	-0.357432	0.0486411	0.924604	Trim12c	7	104338754	104353362	-	3740	protein_coding	tripartite motif-containing 12C [Source:MGI Symbol;Acc:MGI:4821183]	-	82	58	61	62	48	85	89	73	51	79	0.948582	0.676315	0.637041	0.731556	0.594778	1.02295	1.06214	0.883586	0.650515	0.941903
ENSMUSG00000020601	823.812	775.899	747.965	781.807	797.801	809.491	859.139	852.325	868.309	903.058	-0.12871	0.0178338	0.774253	Trib2	12	15791727	15816922	-	4335	protein_coding	tribbles pseudokinase 2 [Source:MGI Symbol;Acc:MGI:2145021]	-	857	791	851	790	767	796	854	840	804	896	8.55311	7.95757	7.66742	8.04203	8.19958	8.26475	8.79293	8.77178	8.84761	9.21658
ENSMUSG00000064043	1009.34	934.806	1011.64	925.303	1040.16	818.644	782.682	934.513	841.309	1028.03	0.159693	0.0344238	0.869891	Trerf1	17	47140875	47361958	+	9070	processed_transcript	transcriptional regulating factor 1 [Source:MGI Symbol;Acc:MGI:2442086]	zf-C2H2	1050	953	1151	935	1000	805	778	921	779	1020	5.00858	4.58225	4.95652	4.54917	5.1095	3.9948	3.82857	4.59674	4.09722	5.01468
ENSMUSG00000030775	2.88382	0	1.75785	0.989629	1.04016	6.10169	4.02407	5.07336	2.15997	4.03151	-1.67009	0.0448511	1	Trat1	16	48730774	48772021	-	4665	protein_coding	T cell receptor associated transmembrane adaptor 1 [Source:MGI Symbol;Acc:MGI:1924897]	-	3	0	2	1	1	6	4	5	2	4	0.0278229	0	0.0167451	0.00945967	0.00993422	0.0578903	0.0382713	0.0485194	0.0204521	0.0382348
ENSMUSG00000038102	1634.17	1556.7	1661.17	1642.78	1672.57	1435.93	1427.54	1597.09	1592.98	1513.83	0.110347	0.0247321	0.845499	Trappc11	8	47490115	47533470	-	6482	protein_coding	trafficking protein particle complex 11 [Source:MGI Symbol;Acc:MGI:2444585]	-	1700	1587	1890	1660	1608	1412	1419	1574	1475	1502	11.3468	10.6773	11.3884	11.3013	11.4964	9.80464	9.77098	10.9924	10.8553	10.3326
ENSMUSG00000076928	53.8313	57.8736	80.8611	47.5022	67.6103	37.6271	43.2588	56.8216	51.8393	34.2678	0.463067	0.0258664	0.845499	Trac	14	54220521	54224206	+	935	TR_C_gene	T cell receptor alpha constant [Source:MGI Symbol;Acc:MGI:4439838]	-	56	59	92	48	65	37	43	56	48	34	2.59125	2.7519	3.84313	2.26546	3.22171	1.78113	2.05268	2.71128	2.449	1.6215
ENSMUSG00000029817	1825.46	1957.89	2023.28	1967.38	2117.76	1627.12	1745.44	1955.27	1935.33	1832.32	0.121121	0.0441437	0.910488	Tra2a	6	49243924	49264033	-	6945	protein_coding	transformer 2 alpha [Source:MGI Symbol;Acc:MGI:1933972]	-	1899	1996	2302	1988	2036	1600	1735	1927	1792	1818	11.83	12.5338	12.9462	12.632	13.586	10.3694	11.1504	12.5605	12.3091	11.6727
ENSMUSG00000033200	4.80637	5.88545	7.0314	2.96889	13.5221	0	3.01805	2.02934	5.39993	0	1.72321	0.0250673	1	Tpsg1	17	25369273	25374442	+	1389	protein_coding	tryptase gamma 1 [Source:MGI Symbol;Acc:MGI:1349391]	-	5	6	8	3	13	0	3	2	5	0	0.15574	0.188383	0.224955	0.0953118	0.433737	0	0.0964015	0.0651816	0.171722	0
ENSMUSG00000074607	2705.02	2487.58	2504.06	2428.55	2468.29	2188.47	2362.13	2310.41	2340.33	2349.36	0.124839	0.00435455	0.486127	Tox2	2	163203125	163324170	+	3401	protein_coding	TOX high mobility group box family member 2 [Source:MGI Symbol;Acc:MGI:3611233]	HMG	2814	2536	2849	2454	2373	2152	2348	2277	2167	2331	35.7973	32.5189	32.7186	31.8416	32.3353	28.4801	30.8146	30.3078	30.3956	30.5623
ENSMUSG00000018322	1489.97	1398.78	1329.81	1344.91	1440.62	1229.49	1228.35	1354.59	1391.02	1265.89	0.114596	0.0375717	0.887644	Tomm34	2	164053540	164071169	-	3040	protein_coding	translocase of outer mitochondrial membrane 34 [Source:MGI Symbol;Acc:MGI:1914395]	-	1550	1426	1513	1359	1385	1209	1221	1335	1288	1256	22.0592	20.4569	19.439	19.7276	21.1136	17.9002	17.927	19.8795	20.2116	18.4233
ENSMUSG00000055322	1570.72	1343.84	1515.27	1397.36	1520.71	1421.69	1296.76	1365.75	1182.58	1426.15	0.134487	0.0374209	0.887644	Tns1	1	73910231	74124449	-	16010	protein_coding	tensin 1 [Source:MGI Symbol;Acc:MGI:104552]	-	1634	1370	1724	1412	1462	1398	1289	1346	1095	1415	4.41564	3.73183	4.20586	3.89198	4.23196	3.93026	3.59357	3.80585	3.26273	3.94108
ENSMUSG00000031097	2.88382	1.96182	5.27355	5.93777	5.20079	1.01695	1.00602	0	2.15997	2.01575	1.7869	0.0384074	1	Tnni2	7	142441808	142444410	+	1497	protein_coding	troponin I, skeletal, fast 2 [Source:MGI Symbol;Acc:MGI:105070]	-	3	2	6	6	5	1	1	0	2	2	0.0867026	0.0582641	0.156545	0.176871	0.154787	0.0300666	0.0298156	0	0.0637334	0.0595743
ENSMUSG00000053475	168.223	177.544	174.027	192.978	177.867	200.339	219.312	209.022	203.037	261.04	-0.296215	0.00405492	0.486127	Tnfaip6	2	52038009	52056686	+	1710	protein_coding	tumor necrosis factor alpha induced protein 6 [Source:MGI Symbol;Acc:MGI:1195266]	-	175	181	198	195	171	197	218	206	188	259	4.42766	4.6161	4.52249	5.03229	4.63431	5.18533	5.69017	5.45341	5.2447	6.7539
ENSMUSG00000028364	74.9793	62.7782	64.1615	57.3985	75.9315	126.102	98.5897	88.2765	90.7188	64.5041	-0.482746	0.00692603	0.563875	Tnc	4	63959785	64047015	-	7772	protein_coding	tenascin C [Source:MGI Symbol;Acc:MGI:101922]	-	78	64	73	58	73	124	98	87	84	64	0.434205	0.35912	0.366859	0.329324	0.435287	0.718116	0.562805	0.506738	0.515591	0.367196
ENSMUSG00000032268	45.1799	38.2554	28.1256	32.6578	33.2851	71.1864	66.3972	48.7043	37.7995	49.386	-0.627035	0.00506417	0.508839	Tmprss5	9	49081260	49117587	+	3058	protein_coding	transmembrane protease, serine 5 (spinesin) [Source:MGI Symbol;Acc:MGI:1933407]	-	47	39	32	33	32	70	66	48	35	49	0.664956	0.556186	0.408716	0.476216	0.484951	1.03031	0.963321	0.710561	0.545996	0.714512
ENSMUSG00000024034	0	0	0	0	0	3.05085	1.00602	1.01467	2.15997	1.00788	-3.20674	0.0337808	1	Tmprss3	17	31179272	31198975	-	2879	protein_coding	transmembrane protease, serine 3 [Source:MGI Symbol;Acc:MGI:2155445]	-	0	0	0	0	0	3	1	1	2	1	0	0	0	0	0	0.0469014	0.0155033	0.0157237	0.0331396	0.0154885
ENSMUSG00000079260	195.139	201.086	217.094	181.102	196.59	161.695	159.957	217.14	159.838	146.142	0.231124	0.0476618	0.921416	Tmppe	9	114401105	114407276	+	2921	protein_coding	transmembrane protein with metallophosphoesterase domain [Source:MGI Symbol;Acc:MGI:5317335]	-	203	205	247	183	189	159	159	214	148	145	3.00675	3.06066	3.30274	2.76469	2.99858	2.45003	2.42957	3.3165	2.41707	2.21354
ENSMUSG00000028328	221.093	236.399	181.059	231.573	203.871	274.576	269.613	249.609	231.117	239.875	-0.23798	0.0166733	0.774199	Tmod1	4	46038935	46116032	+	3946	protein_coding	tropomodulin 1 [Source:MGI Symbol;Acc:MGI:98775]	-	230	241	206	234	196	270	268	246	214	238	2.52176	2.6635	2.03901	2.6169	2.30189	3.07973	3.03139	2.82212	2.58711	2.68949
ENSMUSG00000035413	255.699	219.724	210.063	283.034	197.63	308.135	305.829	269.903	299.156	282.205	-0.329413	0.00156506	0.33587	Tmem98	11	80810175	80822033	+	1633	protein_coding	transmembrane protein 98 [Source:MGI Symbol;Acc:MGI:1923457]	-	266	224	239	286	190	303	304	266	277	280	7.04738	5.98211	5.71637	7.72872	5.39204	8.35146	8.30906	7.37383	8.09194	7.64579
ENSMUSG00000020747	1707.22	1675.39	1619.86	1678.41	1723.54	1507.12	1513.05	1675.22	1523.86	1575.31	0.108241	0.0178992	0.774253	Tmem94	11	115765433	115799366	+	5920	protein_coding	transmembrane protein 94 [Source:MGI Symbol;Acc:MGI:1919197]	-	1776	1708	1843	1696	1657	1482	1504	1651	1411	1563	12.9794	12.5823	12.1594	12.6425	12.9714	11.2676	11.3394	12.6247	11.3701	11.773
ENSMUSG00000075610	0	0.980909	0	0.989629	0	3.05085	7.04212	3.04402	1.07999	0	-2.84546	0.0336855	1	Tmem92	11	94777217	94782703	-	2187	protein_coding	transmembrane protein 92 [Source:MGI Symbol;Acc:MGI:3034723]	-	0	1	0	1	0	3	7	3	1	0	0	0.0199409	0	0.020178	0	0.0617417	0.142861	0.0620969	0.0218127	0
ENSMUSG00000073680	1677.42	1846.07	1577.67	1700.18	1473.9	2250.51	1993.93	1906.57	1892.14	1711.37	-0.237246	0.00168783	0.34928	Tmem88b	4	155781591	155785874	-	3471	protein_coding	transmembrane protein 88B [Source:MGI Symbol;Acc:MGI:2444329]	-	1745	1882	1795	1718	1417	2213	1982	1879	1752	1698	21.7507	23.646	20.1985	21.8422	18.9191	28.6967	25.4867	24.5058	24.079	21.8139
ENSMUSG00000034145	1037.21	922.054	988.79	1037.13	1041.2	876.61	912.458	941.616	843.469	1004.85	0.133867	0.0292094	0.848908	Tmem63c	12	87021340	87090043	+	4089	protein_coding	transmembrane protein 63c [Source:MGI Symbol;Acc:MGI:2444386]	-	1079	940	1125	1048	1001	862	907	928	781	997	11.4166	10.0254	10.7459	11.3102	11.3449	9.48847	9.90045	10.2737	9.11156	10.8725
ENSMUSG00000026519	825.734	848.486	747.086	818.423	708.348	1242.71	1038.21	882.765	889.908	957.483	-0.344127	0.000175781	0.146796	Tmem63a	1	180942344	180975112	+	4492	protein_coding	transmembrane protein 63a [Source:MGI Symbol;Acc:MGI:2384789]	-	859	865	850	827	681	1222	1032	870	824	950	8.27344	8.39787	7.39074	8.12444	7.02575	12.2444	10.2543	8.76752	8.75077	9.4305
ENSMUSG00000031951	380.664	368.822	409.579	365.173	444.147	311.186	346.07	338.901	358.555	335.623	0.219769	0.00611186	0.529976	Tmem231	8	111912011	111933881	-	5372	protein_coding	transmembrane protein 231 [Source:MGI Symbol;Acc:MGI:2685024]	-	396	376	466	369	427	306	344	334	332	333	3.18927	3.05242	3.38812	3.03122	3.68364	2.56384	2.85816	2.81454	2.94823	2.76413
ENSMUSG00000026627	240.318	333.509	319.05	317.671	358.854	259.322	267.601	268.888	281.876	283.213	0.20496	0.0431786	0.905032	Tmem206	1	191325912	191350914	+	2246	protein_coding	transmembrane protein 206 [Source:MGI Symbol;Acc:MGI:1914200]	-	250	340	363	321	345	255	266	265	261	281	4.81574	6.60179	6.31256	6.307	7.1186	5.11018	5.28611	5.34113	5.54357	5.57888
ENSMUSG00000090213	495.056	653.285	484.288	527.472	436.866	606.101	662.966	541.835	602.632	581.545	-0.205719	0.0345304	0.869916	Tmem189	2	167642608	167689822	-	3265	protein_coding	transmembrane protein 189 [Source:MGI Symbol;Acc:MGI:2142624]	-	515	666	551	533	420	596	659	534	558	577	6.82428	8.89578	6.59139	7.20396	5.96144	8.21616	9.0088	7.40381	8.15286	7.88031
ENSMUSG00000023367	657.511	559.118	656.557	643.259	638.657	560.339	504.015	571.26	587.512	567.435	0.177851	0.00933278	0.628017	Tmem176a	6	48840919	48847071	+	3810	protein_coding	transmembrane protein 176A [Source:MGI Symbol;Acc:MGI:1913308]	-	684	570	747	650	614	551	501	563	544	563	7.76719	6.52443	7.65781	7.52863	7.46842	6.50927	5.86918	6.6893	6.81134	6.58922
ENSMUSG00000024349	68.2504	43.16	58.888	52.4503	61.3693	43.7288	28.1685	39.5722	39.9595	53.4175	0.472257	0.022674	0.83144	Tmem173	18	35733678	35740554	-	2302	protein_coding	transmembrane protein 173 [Source:MGI Symbol;Acc:MGI:1919762]	-	71	44	67	53	59	43	28	39	37	53	1.3344	0.833566	1.13678	1.01601	1.18777	0.840754	0.542897	0.766932	0.766753	1.02665
ENSMUSG00000006850	227.822	293.292	243.462	256.314	244.437	207.457	219.312	232.36	206.277	229.796	0.20737	0.0288614	0.846034	Tmco6	18	36735068	36742391	+	1817	protein_coding	transmembrane and coiled-coil domains 6 [Source:MGI Symbol;Acc:MGI:1919233]	-	237	299	277	259	235	204	218	229	191	228	5.64321	7.17644	5.95434	6.29032	5.99375	5.05337	5.35508	5.70529	5.01461	5.59539
ENSMUSG00000044583	34.6059	37.2745	36.9148	45.5229	37.4457	23.3898	25.1504	18.2641	20.5197	26.2048	0.75409	0.00126915	0.287791	Tlr7	X	167304929	167330558	-	4082	protein_coding	toll-like receptor 7 [Source:MGI Symbol;Acc:MGI:2176882]	-	36	38	42	46	36	23	25	18	19	26	0.381559	0.405979	0.40187	0.497293	0.40871	0.253607	0.273358	0.199617	0.222044	0.284021
ENSMUSG00000019437	391.238	328.604	370.027	470.074	407.742	445.423	455.726	510.38	523.793	435.403	-0.269073	0.00471336	0.486127	Tlcd1	11	78176711	78181909	+	5009	protein_coding	TLC domain containing 1 [Source:MGI Symbol;Acc:MGI:1915572]	-	407	335	421	475	392	438	453	503	485	432	3.51541	2.91667	3.28277	4.18476	3.62677	3.93576	4.03656	4.54584	4.61902	3.84577
ENSMUSG00000034371	281.653	276.616	276.861	278.086	313.088	247.118	254.522	236.419	247.317	269.103	0.183877	0.0271414	0.845499	Tkfc	19	10592200	10604258	-	2253	protein_coding	triokinase, FMN cyclase [Source:MGI Symbol;Acc:MGI:2385084]	-	293	282	315	281	301	243	253	233	229	267	5.62651	5.45859	5.46082	5.50393	6.19143	4.85457	5.01215	4.68158	4.84879	5.28446
ENSMUSG00000030317	839.192	1124.12	1099.53	755.087	1025.6	820.677	789.724	818.84	893.148	876.853	0.206302	0.0370319	0.886673	Timp4	6	115241892	115252205	-	5894	protein_coding	tissue inhibitor of metalloproteinase 4 [Source:MGI Symbol;Acc:MGI:109125]	-	873	1146	1251	763	986	807	785	807	827	870	6.40821	8.47944	8.29003	5.71271	7.75268	6.16268	5.94462	6.19813	6.69352	6.58203
ENSMUSG00000089847	223.977	235.418	220.61	232.563	253.799	174.915	217.3	210.037	208.437	206.615	0.195944	0.03758	0.887644	Timm10b	7	105640056	105643637	+	3582	protein_coding	translocase of inner mitochondrial membrane 10B [Source:MGI Symbol;Acc:MGI:1315196]	-	233	240	251	235	244	172	216	207	193	205	2.81425	2.92199	2.73689	2.89514	3.15682	2.16127	2.69149	2.61603	2.57034	2.55199
ENSMUSG00000021779	519.088	501.244	475.498	461.167	478.473	395.593	417.497	390.649	425.514	398.111	0.264993	8.55554e-05	0.0991473	Thrb	14	17660261	18038090	+	7403	protein_coding	thyroid hormone receptor beta [Source:MGI Symbol;Acc:MGI:98743]	THR-like	540	511	541	466	460	389	415	385	394	395	3.15587	3.01027	2.85429	2.77783	2.87962	2.36509	2.5021	2.35424	2.53891	2.37925
ENSMUSG00000000214	645.976	545.385	620.521	517.576	711.468	412.881	423.533	513.424	601.552	554.332	0.279607	0.0130175	0.708276	Th	7	142892752	142931128	-	2364	protein_coding	tyrosine hydroxylase [Source:MGI Symbol;Acc:MGI:98735]	-	672	556	706	523	684	406	421	506	557	550	12.2986	10.257	11.6645	9.76297	13.4089	7.73009	7.94876	9.68948	11.24	10.3745
ENSMUSG00000078921	5.76764	6.86636	5.27355	11.8755	6.24095	19.322	16.0963	10.1467	11.8798	10.0788	-0.912272	0.0302957	0.856052	Tgtp2	11	49057194	49064206	-	2938	protein_coding	T cell specific GTPase 2 [Source:MGI Symbol;Acc:MGI:3710083]	-	6	7	6	12	6	19	16	10	11	10	0.0883552	0.103906	0.0797643	0.180242	0.0946422	0.291077	0.243071	0.15408	0.178608	0.151775
ENSMUSG00000056429	4360.34	4553.38	4622.27	4504.79	4657.83	4135.93	4055.26	4393.53	3940.87	4003.29	0.144854	0.000318667	0.173106	Tgoln1	6	72608432	72617000	-	5013	protein_coding	trans-golgi network protein [Source:MGI Symbol;Acc:MGI:105080]	-	4536	4642	5259	4552	4478	4067	4031	4330	3649	3972	39.1478	40.3832	40.9746	40.0712	41.3973	36.5159	35.8905	39.101	34.7244	35.3315
ENSMUSG00000023990	221.093	219.724	202.153	238.501	194.51	276.61	253.516	217.14	272.156	247.938	-0.235805	0.0158082	0.754471	Tfeb	17	47737030	47792419	+	5669	protein_coding	transcription factor EB [Source:MGI Symbol;Acc:MGI:103270]	bHLH	230	224	230	241	187	272	252	214	252	246	1.75531	1.72319	1.58464	1.87602	1.52869	2.15958	1.98408	1.70885	2.12057	1.93499
ENSMUSG00000026492	236.473	287.406	283.014	288.972	320.369	256.271	253.516	251.639	213.837	246.93	0.210688	0.0287742	0.845499	Tfb2m	1	179528055	179546267	-	2804	protein_coding	transcription factor B2, mitochondrial [Source:MGI Symbol;Acc:MGI:107937]	-	246	293	322	292	308	252	252	248	198	245	3.79568	4.55704	4.48525	4.5955	5.09047	4.04509	4.01132	4.00379	3.36857	3.89618
ENSMUSG00000029660	9.61274	6.86636	7.0314	11.8755	9.36142	19.322	14.0842	13.1907	22.6797	11.0866	-0.845589	0.0253579	0.845499	Tex26	5	149439660	149470979	+	2065	protein_coding	testis expressed 26 [Source:MGI Symbol;Acc:MGI:1923110]	-	10	7	8	12	9	19	14	13	21	11	0.209514	0.147833	0.151314	0.256442	0.20198	0.414133	0.302603	0.284984	0.48513	0.237533
ENSMUSG00000009628	17.3029	24.5227	20.2153	18.8029	12.4819	76.2711	23.1384	37.5429	21.5997	14.1103	-0.886266	0.0257686	0.845499	Tex15	8	33516738	33585582	+	9622	protein_coding	testis expressed gene 15 [Source:MGI Symbol;Acc:MGI:1934816]	-	18	25	23	19	12	75	23	37	20	14	0.0809356	0.11331	0.0933623	0.0871397	0.0577965	0.350834	0.106691	0.174074	0.099157	0.0648804
ENSMUSG00000033985	114.392	94.1672	94.9239	121.724	75.9315	125.085	141.849	107.555	123.118	128	-0.319226	0.0258666	0.845499	Tesk2	4	116720948	116805956	+	4272	protein_coding	testis-specific kinase 2 [Source:MGI Symbol;Acc:MGI:2385204]	-	119	96	108	123	73	123	141	106	114	127	1.20517	0.980015	0.987419	1.27058	0.791912	1.29592	1.47317	1.12324	1.27301	1.32563
ENSMUSG00000040140	31.722	21.58	40.4305	26.72	20.8032	73.2203	38.2287	25.3668	39.9595	42.3308	-0.627482	0.030468	0.856052	Tdrd6	17	43615335	43630299	-	7062	protein_coding	tudor domain containing 6 [Source:MGI Symbol;Acc:MGI:2679727]	-	33	22	46	27	20	72	38	25	37	42	0.202171	0.135859	0.254413	0.168719	0.131246	0.458892	0.240171	0.160254	0.249938	0.265199
ENSMUSG00000022019	303.762	313.891	317.292	337.463	355.734	385.423	382.287	360.209	355.315	352.757	-0.174774	0.0218143	0.819599	Tdrd3	14	87416639	87545504	+	6072	protein_coding	tudor domain containing 3 [Source:MGI Symbol;Acc:MGI:2444023]	-	316	320	361	341	342	379	380	355	329	350	2.25158	2.29832	2.32212	2.47828	2.61024	2.8094	2.79329	2.64663	2.58478	2.57032
ENSMUSG00000030491	8.65146	18.6373	7.0314	23.7511	11.4417	2.0339	10.0602	11.1614	2.15997	8.06301	1.0441	0.0448765	0.913452	Tdrd12	7	35469098	35537745	-	4338	protein_coding	tudor domain containing 12 [Source:MGI Symbol;Acc:MGI:1919231]	-	9	19	8	24	11	2	10	11	2	8	0.0897605	0.19101	0.0720293	0.244146	0.117514	0.0207514	0.10289	0.114789	0.0219938	0.0822339
ENSMUSG00000047671	19.2255	16.6754	21.9731	21.7718	12.4819	34.5762	22.1324	21.3081	37.7995	28.2205	-0.63652	0.0249459	0.845499	Tctex1d4	4	117126794	117128738	+	1111	protein_coding	Tctex1 domain containing 4 [Source:MGI Symbol;Acc:MGI:3045358]	-	20	17	25	22	12	34	22	21	35	28	0.77884	0.66731	0.878891	0.873849	0.500556	1.37743	0.883839	0.855663	1.50284	1.12381
ENSMUSG00000006642	18.2642	22.5609	21.9731	14.8444	17.6827	15.2542	13.0782	2.02934	14.0398	9.07089	0.838878	0.0285961	0.845499	Tcf23	5	30968662	30977018	+	4116	protein_coding	transcription factor 23 [Source:MGI Symbol;Acc:MGI:1934960]	bHLH	19	23	25	15	17	15	13	2	13	9	0.199715	0.243694	0.237232	0.160821	0.191407	0.164029	0.140972	0.0219964	0.15067	0.097503
ENSMUSG00000051579	567.151	623.858	554.602	562.109	572.087	608.135	656.93	610.833	667.431	602.71	-0.12758	0.0414873	0.905032	Tceal8	X	136168984	136172342	-	2563	protein_coding	transcription elongation factor A (SII)-like 8 [Source:MGI Symbol;Acc:MGI:1913934]	-	590	636	631	568	550	598	653	602	618	598	9.95946	10.8218	9.61589	9.77974	9.94488	10.5017	11.3718	10.6327	11.5027	10.4041
ENSMUSG00000001604	22.1093	6.86636	15.8206	15.8341	7.28111	30.5085	31.1866	17.2494	24.8397	20.1575	-0.860821	0.0138574	0.70848	Tcea3	4	136247729	136274898	+	1400	protein_coding	transcription elongation factor A (SII), 3 [Source:MGI Symbol;Acc:MGI:1196908]	-	23	7	18	16	7	30	31	17	23	20	0.710775	0.218053	0.502173	0.504335	0.231716	0.964493	0.988322	0.549691	0.783716	0.637019
ENSMUSG00000026572	35.5671	38.2554	26.3677	19.7926	28.0843	16.2712	10.0602	21.3081	22.6797	26.2048	0.618728	0.0379686	0.887644	Tbx19	1	165137855	165160773	-	3192	protein_coding	T-box 19 [Source:MGI Symbol;Acc:MGI:1891158]	T-box	37	39	30	20	27	16	10	21	21	26	0.501501	0.532837	0.367085	0.2765	0.392	0.225612	0.13983	0.29782	0.313845	0.363213
ENSMUSG00000036644	3481.73	3721.57	3494.61	3376.61	3674.88	3257.29	3183.04	3425.53	3452.72	3385.46	0.0875331	0.0394621	0.894688	Tbc1d9b	11	50131396	50172785	+	6429	protein_coding	TBC1 domain family, member 9B [Source:MGI Symbol;Acc:MGI:1924045]	-	3622	3794	3976	3412	3533	3203	3164	3376	3197	3359	24.3746	25.7363	24.1553	23.4203	25.4675	22.4243	21.9663	23.7715	23.7224	23.2979
ENSMUSG00000039178	572.919	647.4	624.037	636.331	553.364	564.406	581.478	479.94	568.073	531.151	0.155654	0.0330766	0.860175	Tbc1d19	5	53809606	53903965	+	3117	protein_coding	TBC1 domain family, member 19 [Source:MGI Symbol;Acc:MGI:1914499]	-	596	660	710	643	532	555	578	473	526	527	8.2726	9.23422	8.89673	9.10336	7.9097	8.01424	8.27667	6.86945	8.05022	7.53919
ENSMUSG00000025503	1405.38	1379.16	1375.52	1339.96	1249.23	1531.52	1555.3	1468.23	1411.54	1423.12	-0.130491	0.0100033	0.63551	Taldo1	7	141392199	141402968	+	2171	protein_coding	transaldolase 1 [Source:MGI Symbol;Acc:MGI:1274789]	-	1462	1406	1565	1354	1201	1506	1546	1447	1307	1412	29.1353	28.2435	28.1555	27.5224	25.6371	31.2227	31.7844	30.1721	28.7194	29.0018
ENSMUSG00000022658	3691.29	3187.95	3354.86	3468.65	3430.44	3603.05	3514.02	3618.32	3981.91	3771.47	-0.109742	0.0283103	0.845499	Tagln3	16	45711230	45724608	-	1240	protein_coding	transgelin 3 [Source:MGI Symbol;Acc:MGI:1926784]	-	3840	3250	3817	3505	3298	3543	3493	3566	3687	3742	133.981	114.302	120.229	124.737	123.258	128.604	125.731	130.184	141.844	134.565
ENSMUSG00000003680	346.059	309.967	312.897	313.712	337.011	374.237	338.022	378.473	376.915	357.796	-0.172778	0.021844	0.819599	Taf6l	19	8772522	8786417	-	5884	protein_coding	TATA-box binding protein associated factor 6 like [Source:MGI Symbol;Acc:MGI:2444957]	-	360	316	356	317	324	368	336	373	349	355	2.64705	2.34211	2.36312	2.37747	2.55186	2.81502	2.54877	2.86968	2.82951	2.69034
ENSMUSG00000072258	347.02	392.363	396.395	377.049	425.425	335.593	339.028	362.238	336.956	354.773	0.164412	0.0313591	0.856052	Taf1a	1	183388981	183410198	+	2409	protein_coding	TATA-box binding protein associated factor, RNA polymerase I, A [Source:MGI Symbol;Acc:MGI:109578]	-	361	400	451	381	409	330	337	357	312	352	6.4834	7.24129	7.31221	6.97936	7.86814	6.16571	6.24393	6.70855	6.17841	6.51563
ENSMUSG00000024807	1278.49	1361.5	1292.02	1270.68	1277.31	1161.36	1130.76	1138.46	1105.91	1325.36	0.144401	0.0112942	0.674665	Syvn1	19	6046576	6053712	+	4772	protein_coding	synovial apoptosis inhibitor 1, synoviolin [Source:MGI Symbol;Acc:MGI:1921376]	-	1330	1388	1470	1284	1228	1142	1124	1122	1024	1315	12.0582	12.6847	12.0317	11.8739	11.9257	10.7714	10.5131	10.6436	10.2367	12.2879
ENSMUSG00000030616	559.461	581.679	599.427	582.891	517.999	753.559	702.2	692.006	602.632	577.513	-0.227622	0.00449873	0.486127	Sytl2	7	90302252	90410719	+	13941	protein_coding	synaptotagmin-like 2 [Source:MGI Symbol;Acc:MGI:1933366]	-	582	593	682	589	498	741	698	682	558	573	1.80618	1.85504	1.91073	1.86444	1.65547	2.39238	2.23474	2.21456	1.90941	1.83278
ENSMUSG00000024261	4036.39	4339.54	4510.64	4359.31	4539.25	3998.64	4121.65	4351.93	4048.87	3895.44	0.0935879	0.039718	0.898981	Syt4	18	31437808	31447415	-	3901	protein_coding	synaptotagmin IV [Source:MGI Symbol;Acc:MGI:101759]	-	4199	4424	5132	4405	4364	3932	4097	4289	3749	3865	46.5696	49.4575	51.383	49.8308	51.8435	45.3674	46.8764	49.7711	45.8457	44.1798
ENSMUSG00000041479	14.4191	23.5418	28.1256	16.8237	19.763	154.576	47.2828	25.3668	19.4397	19.1497	-1.37171	0.0292682	0.848908	Syt15	14	34219595	34230420	+	5164	protein_coding	synaptotagmin XV [Source:MGI Symbol;Acc:MGI:2442166]	-	15	24	32	17	19	152	47	25	18	19	0.125672	0.202683	0.242032	0.145275	0.170511	1.32484	0.406234	0.219155	0.166282	0.164066
ENSMUSG00000020570	788.244	772.956	759.391	761.025	678.183	958.982	849.079	794.488	801.35	805.293	-0.16253	0.017099	0.774253	Sypl	12	32953891	32979860	+	8345	protein_coding	synaptophysin-like protein [Source:MGI Symbol;Acc:MGI:108081]	-	820	788	864	769	652	943	844	783	742	799	4.25128	4.11806	4.04386	4.06656	3.62082	5.08617	4.5142	4.24749	4.24167	4.26944
ENSMUSG00000071234	420.077	449.256	359.48	413.665	291.244	623.389	585.502	380.502	404.995	417.261	-0.318651	0.0279245	0.845499	Syndig1l	12	84677277	84698831	-	3080	protein_coding	synapse differentiation inducing 1 like [Source:MGI Symbol;Acc:MGI:2685107]	-	437	458	409	418	280	613	582	375	375	414	6.13851	6.48496	5.18658	5.98898	4.21301	8.9581	8.43406	5.5116	5.80817	5.99377
ENSMUSG00000028821	751.716	704.292	704.019	727.377	713.548	789.152	764.573	750.857	826.189	769.01	-0.114704	0.0348403	0.872664	Syf2	4	134930898	134937548	+	2043	protein_coding	SYF2 homolog, RNA splicing factor (S. cerevisiae) [Source:MGI Symbol;Acc:MGI:1915842]	-	782	718	801	735	686	776	760	740	765	763	16.5604	15.3267	15.3134	15.8762	15.5611	17.0962	16.6039	16.3969	17.8629	16.6536
ENSMUSG00000031015	122.082	120.652	94.9239	113.807	95.6945	148.474	117.704	136.981	142.558	123.969	-0.291493	0.0231533	0.833379	Swap70	7	110221711	110283506	+	8090	protein_coding	SWA-70 protein [Source:MGI Symbol;Acc:MGI:1298390]	-	127	123	108	115	92	146	117	135	132	123	0.679184	0.663055	0.521416	0.627302	0.527017	0.812288	0.645509	0.75541	0.778367	0.677965
ENSMUSG00000051111	1307.33	1321.28	1537.24	1454.75	1598.72	1272.2	1098.57	1360.68	1389.94	1336.44	0.16096	0.0338202	0.862018	Sv2c	13	95954594	96132577	-	9700	protein_coding	synaptic vesicle glycoprotein 2c [Source:MGI Symbol;Acc:MGI:1922459]	-	1360	1347	1749	1470	1537	1251	1092	1341	1287	1326	6.06596	6.05604	7.0425	6.68764	7.34324	5.80486	5.02476	6.25827	6.32945	6.09568
ENSMUSG00000086596	208.596	223.647	209.184	207.822	211.152	181.017	179.071	187.714	180.358	196.536	0.197106	0.0315445	0.856052	Susd5	9	114057140	114098728	+	4083	protein_coding	sushi domain containing 5 [Source:MGI Symbol;Acc:MGI:2685972]	-	217	228	238	210	203	178	178	185	167	195	2.29939	2.43528	2.2767	2.26969	2.3041	1.96221	1.94583	2.05111	1.95117	2.12964
ENSMUSG00000006342	1051.63	898.512	973.849	972.805	1102.57	730.169	803.808	954.807	911.508	916.16	0.211765	0.00837991	0.614633	Susd2	10	75636706	75644008	-	3435	protein_coding	sushi domain containing 2 [Source:MGI Symbol;Acc:MGI:1918983]	-	1094	916	1108	983	1060	718	799	941	844	909	13.7792	11.6295	12.5986	12.6286	14.3009	9.40814	10.3821	12.4011	11.7213	11.8002
ENSMUSG00000020265	1717.8	1539.05	1634.8	1763.52	1510.31	1782.71	1721.3	1795.97	1781.98	1755.72	-0.113823	0.0272747	0.845499	Sumo3	10	77606097	77618331	+	3660	protein_coding	small ubiquitin-like modifier 3 [Source:MGI Symbol;Acc:MGI:1336201]	-	1787	1569	1860	1782	1452	1753	1711	1770	1650	1742	21.124	18.6954	19.8491	21.4859	18.3853	21.5579	20.8657	21.8922	21.5061	21.2235
ENSMUSG00000020738	925.707	845.543	776.091	910.458	804.042	978.304	986.903	905.088	987.107	1016.95	-0.194053	0.00208094	0.38482	Sumo2	11	115523102	115536276	-	1736	protein_coding	small ubiquitin-like modifier 2 [Source:MGI Symbol;Acc:MGI:2158813]	-	963	862	883	920	773	962	981	892	914	1009	23.9999	21.6546	19.8664	23.3865	20.6355	24.942	25.2223	23.2601	25.1163	25.9174
ENSMUSG00000030711	142.269	241.304	332.234	113.807	263.16	138.305	105.632	104.511	112.319	94.7404	0.976671	0.00101614	0.252286	Sult1a1	7	126672865	126676432	-	1507	protein_coding	sulfotransferase family 1A, phenol-preferring, member 1 [Source:MGI Symbol;Acc:MGI:102896]	-	148	246	378	115	253	136	105	103	104	94	4.24894	7.11893	9.79687	3.36754	7.78023	4.06192	3.10986	3.09401	3.29215	2.78141
ENSMUSG00000052738	1555.34	1646.95	1517.02	1594.29	1611.2	1684.07	1675.02	1670.15	1842.46	1634.78	-0.102215	0.0317189	0.856052	Suclg1	6	73248382	73276911	+	4617	protein_coding	succinate-CoA ligase, GDP-forming, alpha subunit [Source:MGI Symbol;Acc:MGI:1927234]	-	1618	1679	1726	1611	1549	1656	1665	1646	1706	1622	15.1618	15.8593	14.6012	15.398	15.5481	16.1438	16.096	16.1387	17.627	15.6654
ENSMUSG00000027882	382.587	402.173	409.579	398.82	356.774	506.44	419.509	450.514	394.195	429.355	-0.173679	0.0311136	0.856052	Stxbp3	3	108793176	108840526	-	5340	protein_coding	syntaxin binding protein 3 [Source:MGI Symbol;Acc:MGI:107362]	-	398	410	466	403	343	498	417	444	365	426	3.22459	3.34839	3.40842	3.33036	2.97672	4.19753	3.48545	3.76391	3.2607	3.55729
ENSMUSG00000030805	962.235	911.264	908.808	895.614	855.01	948.813	964.771	959.88	1007.63	981.672	-0.100628	0.0490457	0.925979	Stx4a	7	127824294	127849019	+	2364	protein_coding	syntaxin 4A (placental) [Source:MGI Symbol;Acc:MGI:893577]	-	1001	929	1034	905	822	933	959	946	933	974	18.3197	17.138	17.0837	16.8939	16.1142	17.764	18.1066	18.1151	18.8275	18.3722
ENSMUSG00000027522	2967.45	2958.42	3114.03	3051.03	3112.15	2689.83	2945.62	2964.87	2937.56	2830.12	0.0815924	0.0460548	0.916309	Stx16	2	174076308	174099771	+	3962	protein_coding	syntaxin 16 [Source:MGI Symbol;Acc:MGI:1923396]	-	3087	3016	3543	3083	2992	2645	2928	2922	2720	2808	33.7097	33.1978	34.9273	34.3389	34.9971	30.0481	32.9854	33.3859	32.7502	31.6034
ENSMUSG00000028832	7418.15	7231.26	6709.71	7461.8	6516.59	7953.55	8319.77	7384.78	8197.09	8030.76	-0.174666	0.000522167	0.214037	Stmn1	4	134468320	134473843	+	1922	protein_coding	stathmin 1 [Source:MGI Symbol;Acc:MGI:96739]	-	7717	7372	7634	7540	6265	7821	8270	7278	7590	7968	173.711	167.273	155.134	173.119	151.061	183.153	192.051	171.418	188.385	184.862
ENSMUSG00000030987	2162.87	2027.54	2243.02	2177.18	2212.42	2018.64	1907.41	2107.47	2058.45	1948.23	0.108571	0.0176796	0.774253	Stim1	7	102267806	102437319	+	10371	protein_coding	stromal interaction molecule 1 [Source:MGI Symbol;Acc:MGI:107476]	-	2250	2067	2552	2200	2127	1985	1896	2077	1906	1933	9.3863	8.69186	9.61101	9.36116	9.50456	8.61481	8.15985	9.06595	8.76721	8.31116
ENSMUSG00000024378	642.131	633.667	572.18	691.751	665.701	720	761.555	765.063	739.79	659.151	-0.186671	0.00600502	0.529976	Stard4	18	33199355	33213862	-	5586	protein_coding	StAR-related lipid transfer (START) domain containing 4 [Source:MGI Symbol;Acc:MGI:2156764]	-	668	646	651	699	640	708	757	754	685	654	5.17378	5.04341	4.55186	5.52209	5.30963	5.70477	6.04867	6.11037	5.8499	5.22069
ENSMUSG00000035459	45.1799	95.1481	77.3454	45.5229	53.0481	51.8644	45.2708	31.4548	25.9197	60.4726	0.556347	0.0378782	0.887644	Stab2	10	86841198	87008025	-	8757	protein_coding	stabilin 2 [Source:MGI Symbol;Acc:MGI:2178743]	-	47	97	88	46	51	51	45	31	24	60	0.232207	0.483069	0.392497	0.231809	0.269898	0.262132	0.229362	0.160252	0.130742	0.305525
ENSMUSG00000042286	342.213	347.242	341.902	307.775	318.288	301.017	323.938	260.771	260.277	304.379	0.19235	0.0262245	0.845499	Stab1	14	31139013	31168641	-	10288	protein_coding	stabilin 1 [Source:MGI Symbol;Acc:MGI:2178742]	-	356	354	389	311	306	296	322	257	241	302	1.4971	1.5006	1.47682	1.334	1.3784	1.29499	1.39698	1.13084	1.11749	1.30896
ENSMUSG00000029534	307.608	308.986	333.113	351.318	427.505	217.627	292.751	289.182	316.436	247.938	0.341348	0.00350645	0.472501	St7	6	17692933	17943025	+	9042	protein_coding	suppression of tumorigenicity 7 [Source:MGI Symbol;Acc:MGI:1927450]	-	320	315	379	355	411	214	291	285	293	246	1.53115	1.51928	1.63713	1.73257	2.10651	1.06526	1.43646	1.42685	1.54583	1.21317
ENSMUSG00000002007	213.403	189.315	186.332	211.781	187.228	220.678	234.402	233.375	215.997	224.757	-0.193343	0.0354672	0.879496	Srpk3	X	73774405	73778925	+	2784	protein_coding	serine/arginine-rich protein specific kinase 3 [Source:MGI Symbol;Acc:MGI:1891338]	-	222	193	212	214	180	217	233	230	200	223	3.44998	3.0233	2.97424	3.39213	2.99632	3.5083	3.73552	3.73987	3.42704	3.57179
ENSMUSG00000026511	1279.46	1194.75	1137.33	1153.91	1161.86	1201.02	1291.73	1307.91	1325.14	1272.95	-0.110364	0.03141	0.856052	Srp9	1	182124737	182132407	+	5541	protein_coding	signal recognition particle 9 [Source:MGI Symbol;Acc:MGI:1350930]	-	1331	1218	1294	1166	1117	1181	1284	1289	1227	1263	10.3926	9.58632	9.12126	9.2862	9.34223	9.59329	10.3429	10.5308	10.5637	10.164
ENSMUSG00000030257	5149.54	4820.19	5256.85	4829.39	5098.85	4448.13	4709.17	5025.67	4422.54	4729.97	0.108325	0.01959	0.808868	Srgap3	6	112717971	112947266	-	9852	protein_coding	SLIT-ROBO Rho GTPase activating protein 3 [Source:MGI Symbol;Acc:MGI:2152938]	-	5357	4914	5981	4880	4902	4374	4681	4953	4095	4693	23.525	21.7522	23.7115	21.8586	23.0587	19.983	21.207	22.7584	19.8284	21.2411
ENSMUSG00000070637	33.6446	36.2936	35.157	34.637	30.1646	24.4068	24.1444	22.3228	30.2396	21.1654	0.478525	0.0402779	0.900166	Srarp	4	141432672	141436105	-	905	protein_coding	steroid receptor associated and regulated protein [Source:MGI Symbol;Acc:MGI:2685540]	-	35	37	40	35	29	24	24	22	28	21	1.67322	1.78298	1.72632	1.70666	1.48503	1.19363	1.18366	1.10045	1.47594	1.03472
ENSMUSG00000021036	724.8	793.555	798.943	797.641	682.344	858.305	893.344	798.547	794.87	831.498	-0.136836	0.0319118	0.856052	Sptlc2	12	87305058	87388355	-	8115	protein_coding	serine palmitoyltransferase, long chain base subunit 2 [Source:MGI Symbol;Acc:MGI:108074]	-	754	809	909	806	656	844	888	787	736	825	4.0199	4.34763	4.37506	4.38303	3.74628	4.68123	4.88415	4.39019	4.32661	4.53332
ENSMUSG00000037239	1152.57	1094.69	1168.97	1164.79	1241.95	1012.88	1012.05	1023.8	1027.07	1154.02	0.154628	0.00577697	0.525765	Spred3	7	29158829	29170411	-	6218	protein_coding	sprouty-related, EVH1 domain containing 3 [Source:MGI Symbol;Acc:MGI:2142186]	-	1199	1116	1330	1177	1194	996	1006	1009	951	1145	8.34259	7.8272	8.35429	8.35321	8.89895	7.20966	7.22124	7.34578	7.29607	8.21118
ENSMUSG00000045671	1048.75	1068.21	1063.5	1051.98	1118.17	917.288	999.982	1046.13	953.628	949.42	0.136407	0.00900185	0.628017	Spred2	11	19924375	20024026	+	4619	protein_coding	sprouty-related, EVH1 domain containing 2 [Source:MGI Symbol;Acc:MGI:2150019]	-	1091	1089	1210	1063	1075	902	994	1031	883	942	10.219	10.2819	10.2317	10.1558	10.7856	8.78951	9.60513	10.1043	9.11951	9.09397
ENSMUSG00000038156	3348.12	3790.23	3801.35	3195.51	3351.39	2807.79	3193.1	3235.79	3110.36	3211.1	0.168776	0.00561245	0.521458	Spon1	7	113765998	114043370	+	10382	protein_coding	spondin 1, (f-spondin) extracellular matrix protein [Source:MGI Symbol;Acc:MGI:2385287]	-	3483	3864	4325	3229	3222	2761	3174	3189	2880	3186	14.5146	16.2311	16.271	13.7251	14.3823	11.9699	13.6455	13.905	13.2334	13.6841
ENSMUSG00000018593	34114.6	32692.7	35120.1	29482	33596.1	27466.8	27944.2	31565.4	33236.6	30974.1	0.126208	0.0411984	0.905032	Sparc	11	55394500	55423183	-	3788	protein_coding	secreted acidic cysteine rich glycoprotein [Source:MGI Symbol;Acc:MGI:98373]	-	35489	33329	39958	29791	32299	27009	27777	31109	30775	30732	405.337	383.712	412.005	347.058	395.152	320.926	327.295	371.769	387.567	361.769
ENSMUSG00000033006	1124.69	1391.91	1155.79	1201.41	1133.77	1480.68	1356.11	1339.37	1258.18	1275.97	-0.159813	0.0204644	0.817511	Sox10	15	79154908	79165240	-	3051	protein_coding	SRY (sex determining region Y)-box 10 [Source:MGI Symbol;Acc:MGI:98358]	HMG	1170	1419	1315	1214	1090	1456	1348	1320	1165	1266	16.5911	20.283	16.8342	17.5592	16.5565	21.4795	19.7202	19.5852	18.2156	18.503
ENSMUSG00000029093	1506.32	1439.97	1225.22	1504.24	1404.21	1616.95	1573.41	1615.36	1433.14	1489.64	-0.127148	0.0465114	0.916309	Sorcs2	5	36017180	36398139	-	8802	protein_coding	sortilin-related VPS10 domain containing receptor 2 [Source:MGI Symbol;Acc:MGI:1932289]	-	1567	1468	1394	1520	1350	1590	1564	1592	1327	1478	7.7023	7.2734	6.18572	7.62061	7.10784	8.13058	7.93086	8.18765	7.19198	7.48762
ENSMUSG00000025006	1597.64	2109.93	2042.62	1524.03	1832.76	1620	1527.13	1649.86	1322.98	1522.9	0.252873	0.00524043	0.508839	Sorbs1	19	40294753	40513779	-	13472	protein_coding	sorbin and SH3 domain containing 1 [Source:MGI Symbol;Acc:MGI:700014]	-	1662	2151	2324	1540	1762	1593	1518	1626	1225	1511	5.33742	6.96308	6.73772	5.04448	6.06121	5.32218	5.02926	5.46369	4.33773	5.0013
ENSMUSG00000038916	952.622	1133.93	1093.38	1012.39	1056.8	938.643	932.578	902.044	979.547	969.577	0.152896	0.00866815	0.620076	Soga3	10	29143839	29199630	+	4175	protein_coding	SOGA family member 3 [Source:MGI Symbol;Acc:MGI:1914662]	-	991	1156	1244	1023	1016	923	927	889	907	962	10.2695	12.0752	11.6378	10.813	11.2778	9.95064	9.91033	9.63924	10.3636	10.2747
ENSMUSG00000057278	215.325	154.003	161.722	187.04	189.309	204.407	232.39	192.788	224.637	209.638	-0.230361	0.0368132	0.885095	Snrpg	6	86371304	86379328	+	1570	protein_coding	small nuclear ribonucleoprotein polypeptide G [Source:MGI Symbol;Acc:MGI:1915261]	-	224	157	184	189	182	201	231	190	208	208	6.17278	4.36107	4.57749	5.31239	5.37226	5.76239	6.56715	5.47837	6.32008	5.90764
ENSMUSG00000040824	857.456	723.911	680.288	736.284	785.319	757.627	819.904	775.21	939.588	936.317	-0.160752	0.0497159	0.925979	Snrpd2	7	19149722	19153542	+	2618	protein_coding	small nuclear ribonucleoprotein D2 [Source:MGI Symbol;Acc:MGI:98345]	-	892	738	774	744	755	745	815	764	870	929	14.741	12.2936	11.5473	12.541	13.3648	12.8083	13.8948	13.2106	15.8529	15.8233
ENSMUSG00000008333	319.143	305.063	300.592	311.733	356.774	386.44	368.202	336.871	367.195	353.765	-0.187347	0.0171573	0.774253	Snrpb2	2	143063039	143072853	+	2857	protein_coding	U2 small nuclear ribonucleoprotein B [Source:MGI Symbol;Acc:MGI:104805]	-	332	311	342	315	343	380	366	332	340	351	5.0276	4.74726	4.67546	4.8655	5.56377	5.98659	5.71789	5.26048	5.67711	5.47832
ENSMUSG00000070167	11.5353	23.5418	9.66817	11.8755	16.6425	4.06779	5.03009	6.08803	8.63989	5.03938	1.3444	0.00261753	0.433331	Snora57	19	8888538	8888685	-	148	snoRNA	small nucleolar RNA, H/ACA box 57 [Source:MGI Symbol;Acc:MGI:5455599]	-	12	24	11	12	16	4	5	6	8	5	3.50794	7.072	2.90295	3.57806	5.01007	1.21648	1.5079	1.83521	2.57862	1.50646
ENSMUSG00000025889	1179.48	1201.61	1101.29	1210.32	1158.74	1228.47	1259.53	1242.97	1322.98	1205.42	-0.097413	0.046267	0.916309	Snca	6	60731575	60829855	-	2703	protein_coding	synuclein, alpha [Source:MGI Symbol;Acc:MGI:1277151]	-	1227	1225	1253	1223	1114	1208	1252	1225	1225	1196	19.6395	19.7644	18.1056	19.9668	19.0996	20.1153	20.6739	20.5158	21.6197	19.7304
ENSMUSG00000001018	851.689	775.899	714.566	744.201	771.797	919.321	850.085	791.444	878.029	829.483	-0.146024	0.0225153	0.829202	Snapin	3	90488026	90491033	-	2290	protein_coding	SNAP-associated protein [Source:MGI Symbol;Acc:MGI:1333745]	-	886	791	813	752	742	904	845	780	813	823	16.739	15.0638	13.8664	14.4914	15.016	17.768	16.4697	15.419	16.9361	16.0256
ENSMUSG00000096215	1.92255	0.980909	0	0.989629	0	8.13559	0	5.07336	2.15997	5.03938	-2.39658	0.0282728	1	Smim22	16	5007288	5008309	+	561	protein_coding	small integral membrane protein 22 [Source:MGI Symbol;Acc:MGI:3643379]	-	2	1	0	1	0	8	0	5	2	5	0.154241	0.0777374	0	0.0786619	0	0.641849	0	0.403464	0.170069	0.397427
ENSMUSG00000038290	1219.86	1153.55	1308.72	1201.41	1335.56	1075.93	1023.12	1237.9	1071.35	1224.57	0.142735	0.0345888	0.870125	Smg6	11	74925823	75164448	+	8453	protein_coding	Smg-6 homolog, nonsense mediated mRNA decay factor (C. elegans) [Source:MGI Symbol;Acc:MGI:2144117]	-	1269	1176	1489	1214	1284	1058	1017	1220	992	1215	6.49506	6.06721	6.88007	6.33775	7.03946	5.63353	5.37001	6.53351	5.59835	6.40938
ENSMUSG00000032402	473.908	483.588	555.48	446.323	468.071	373.22	455.726	406.884	457.914	400.127	0.214919	0.00985068	0.63551	Smad3	9	63646767	63757994	-	5542	protein_coding	SMAD family member 3 [Source:MGI Symbol;Acc:MGI:1201674]	MH1	493	493	632	451	450	367	453	401	424	397	3.84869	3.87948	4.45409	3.59118	3.76297	2.98061	3.64835	3.27548	3.64971	3.19429
ENSMUSG00000033214	888.217	863.2	892.109	918.376	926.781	717.966	854.109	869.574	816.469	834.522	0.132967	0.0282184	0.845499	Slitrk5	14	111675097	111683141	+	5263	protein_coding	SLIT and NTRK-like family, member 5 [Source:MGI Symbol;Acc:MGI:2679448]	-	924	880	1015	928	891	706	849	857	756	828	7.59576	7.29192	7.53254	7.78112	7.84566	6.03778	7.20011	7.37131	6.85247	7.01532
ENSMUSG00000075478	1412.11	1425.26	1565.37	1418.14	1443.74	1143.05	1215.27	1338.35	1448.26	1351.56	0.161857	0.0132419	0.708276	Slitrk1	14	108908800	108914158	-	5359	protein_coding	SLIT and NTRK-like family, member 1 [Source:MGI Symbol;Acc:MGI:2679446]	-	1469	1453	1781	1433	1388	1124	1208	1319	1341	1341	11.8596	11.8243	12.9804	11.8002	12.003	9.44036	10.0612	11.1419	11.9372	11.1582
ENSMUSG00000026065	0	0	0	0	1.04016	1.01695	5.03009	0	3.23996	1.00788	-2.9514	0.0470793	1	Slc9a4	1	40580081	40630725	+	4562	protein_coding	solute carrier family 9 (sodium/hydrogen exchanger), member 4 [Source:MGI Symbol;Acc:MGI:105074]	-	0	0	0	0	1	1	5	0	3	1	0	0	0	0	0.0101585	0.00986622	0.0489192	0	0.0313708	0.00977452
ENSMUSG00000028542	1597.64	1456.65	1385.19	1434.96	1313.72	1518.3	1563.35	1516.93	1576.78	1642.84	-0.121028	0.0312881	0.856052	Slc6a9	4	117834506	117875198	+	5141	protein_coding	solute carrier family 6 (neurotransmitter transporter, glycine), member 9 [Source:MGI Symbol;Acc:MGI:95760]	-	1662	1485	1576	1450	1263	1493	1554	1495	1460	1630	13.9867	12.5971	11.9734	12.4465	11.3852	13.0713	13.4917	13.1641	13.5477	14.1381
ENSMUSG00000019558	1649.55	1640.08	1444.95	1658.62	1517.59	1734.91	1723.31	1617.39	1668.58	1789.99	-0.109853	0.0390425	0.894688	Slc6a8	X	73673150	73682502	+	5210	protein_coding	solute carrier family 6 (neurotransmitter transporter, creatine), member 8 [Source:MGI Symbol;Acc:MGI:2147834]	-	1716	1672	1644	1676	1459	1706	1713	1594	1545	1776	14.2499	13.9956	12.3246	14.1959	12.9779	14.7383	14.6752	13.8499	14.1465	15.2004
ENSMUSG00000028962	854.572	896.551	831.463	773.89	831.086	973.22	932.578	887.838	875.869	914.144	-0.130553	0.0219717	0.819599	Slc4a2	5	24423837	24440950	+	8322	protein_coding	solute carrier family 4 (anion exchanger), member 2 [Source:MGI Symbol;Acc:MGI:109351]	-	889	914	946	782	799	957	927	875	811	907	4.62175	4.78973	4.43989	4.14674	4.44943	5.17595	4.97183	4.75968	4.64892	4.85993
ENSMUSG00000074796	37.4897	20.5991	38.6727	33.6474	28.0843	21.3559	20.1204	20.2934	18.3598	28.2205	0.551016	0.0376847	0.887644	Slc4a11	2	130684113	130697519	-	4998	protein_coding	solute carrier family 4, sodium bicarbonate transporter-like, member 11 [Source:MGI Symbol;Acc:MGI:2138987]	-	39	21	44	34	27	21	20	20	17	28	0.337599	0.183238	0.343847	0.3002	0.250353	0.189116	0.178607	0.181147	0.16226	0.249812
ENSMUSG00000025993	147.075	129.48	80.8611	136.569	88.4134	154.576	178.065	152.201	128.518	162.268	-0.415165	0.0115431	0.677884	Slc40a1	1	45908068	45926523	-	9000	protein_coding	solute carrier family 40 (iron-regulated transporter), member 1 [Source:MGI Symbol;Acc:MGI:1315204]	-	153	132	92	138	85	152	177	150	119	161	0.735498	0.639623	0.399258	0.67665	0.437685	0.760163	0.8778	0.754477	0.630759	0.79769
ENSMUSG00000031170	79.7857	73.5681	75.5875	37.6059	84.2528	64.0678	54.325	40.5869	49.6794	52.4096	0.426183	0.0460108	0.916309	Slc38a5	X	8271133	8280179	+	2241	protein_coding	solute carrier family 38, member 5 [Source:MGI Symbol;Acc:MGI:2148066]	-	83	75	86	38	81	63	54	40	46	52	1.60239	1.45953	1.49888	0.748289	1.67505	1.26533	1.07552	0.808008	0.979208	1.03469
ENSMUSG00000010064	1171.79	1148.64	939.571	1150.94	1124.41	1273.22	1332.97	1172.96	1303.54	1202.4	-0.183918	0.00619485	0.529976	Slc38a3	9	107650634	107669530	-	5277	protein_coding	solute carrier family 38, member 3 [Source:MGI Symbol;Acc:MGI:1923507]	-	1219	1171	1069	1163	1081	1252	1325	1156	1207	1193	9.99423	9.67749	7.91224	9.72568	9.49345	10.6788	11.2071	9.91672	10.9114	10.081
ENSMUSG00000044026	46.1411	33.3509	37.7938	32.6578	31.2047	106.78	45.2708	41.6016	43.1994	36.2836	-0.591423	0.0401342	0.900166	Slc35g1	19	38395980	38405607	+	3471	protein_coding	solute carrier family 35, member G1 [Source:MGI Symbol;Acc:MGI:2444789]	-	48	34	43	33	30	105	45	41	40	36	0.5983	0.427186	0.483863	0.419553	0.400546	1.36157	0.578659	0.53472	0.549749	0.462486
ENSMUSG00000029151	148.997	121.633	116.897	147.455	123.779	194.237	280.679	149.157	136.078	141.103	-0.453314	0.0129839	0.708276	Slc30a3	5	31086106	31108237	-	2834	protein_coding	solute carrier family 30 (zinc transporter), member 3 [Source:MGI Symbol;Acc:MGI:1345280]	-	155	124	133	149	119	191	279	147	126	140	2.36627	1.90816	1.83299	2.32014	1.94595	3.03347	4.39409	2.34809	2.12095	2.20282
ENSMUSG00000031808	3265.45	3928.54	3673.03	3091.6	3387.79	3149.49	3085.46	3001.4	3123.32	3158.69	0.160805	0.00807467	0.60341	Slc27a1	8	71568882	71587302	+	5835	protein_coding	solute carrier family 27 (fatty acid transporter), member 1 [Source:MGI Symbol;Acc:MGI:1347098]	-	3397	4005	4179	3124	3257	3097	3067	2958	2892	3134	25.1876	29.9333	27.9731	23.6264	25.868	23.8895	23.4605	22.9485	23.6438	23.9502
ENSMUSG00000040441	57.6764	53.95	52.7355	58.3881	70.7307	95.5932	102.614	72.0417	77.759	78.6144	-0.543658	0.000954943	0.251512	Slc26a10	10	127171393	127180645	-	4027	protein_coding	solute carrier family 26, member 10 [Source:MGI Symbol;Acc:MGI:2143920]	-	60	55	60	59	68	94	102	71	72	78	0.644618	0.595626	0.58194	0.646544	0.782551	1.05064	1.13053	0.798131	0.852923	0.863701
ENSMUSG00000040740	172.068	213.838	195.121	172.195	229.875	143.39	162.975	155.245	143.638	125.985	0.425751	0.000309752	0.173106	Slc25a34	4	141618824	141623821	-	2670	protein_coding	solute carrier family 25, member 34 [Source:MGI Symbol;Acc:MGI:2686215]	-	179	218	222	174	221	141	162	153	133	125	2.90051	3.56072	3.24751	2.87585	3.83589	2.37692	2.70812	2.59405	2.37629	2.08761
ENSMUSG00000005360	10182.8	10602.6	11102.6	10216.9	10963.3	9390.5	9433.43	10545.5	10048.2	9958.83	0.104068	0.0182742	0.777813	Slc1a3	15	8634124	8710764	-	8537	protein_coding	solute carrier family 1 (glial high affinity glutamate transporter), member 3 [Source:MGI Symbol;Acc:MGI:99917]	-	10593	10809	12632	10324	10540	9234	9377	10393	9304	9881	53.6842	55.217	57.7931	53.3667	57.2164	48.6845	49.0256	55.1103	51.9904	51.6115
ENSMUSG00000024552	24.0318	9.80909	21.0942	29.6889	34.3252	47.7966	34.2046	41.6016	22.6797	33.2599	-0.599842	0.0467894	0.916309	Slc14a2	18	78146940	78209094	-	3201	protein_coding	solute carrier family 14 (urea transporter), member 2 [Source:MGI Symbol;Acc:MGI:1351653]	-	25	10	24	30	33	47	34	41	21	33	0.337899	0.136241	0.292843	0.413583	0.477764	0.660873	0.474087	0.579823	0.312963	0.459705
ENSMUSG00000020805	189.371	149.098	140.628	191.988	145.622	142.373	227.36	200.905	226.797	197.544	-0.284881	0.0429016	0.905032	Slc13a5	11	72241989	72267222	-	4940	protein_coding	solute carrier family 13 (sodium-dependent citrate transporter), member 5 [Source:MGI Symbol;Acc:MGI:3037150]	-	197	152	160	194	140	140	226	198	210	196	1.72533	1.34187	1.26503	1.73302	1.31337	1.27558	2.04195	1.81441	2.02792	1.76921
ENSMUSG00000017765	401.812	356.07	336.628	423.561	327.65	449.491	367.196	409.928	446.034	450.521	-0.201922	0.0278123	0.845499	Slc12a4	8	105943590	105966097	-	4279	protein_coding	solute carrier family 12, member 4 [Source:MGI Symbol;Acc:MGI:1309465]	-	418	363	383	428	315	442	365	404	413	447	4.22636	3.69962	3.49595	4.41397	3.41156	4.64928	3.80728	4.27402	4.60433	4.65818
ENSMUSG00000037112	356.633	464.951	392.879	418.613	448.308	309.152	317.902	374.414	316.436	375.938	0.295976	0.00153881	0.334364	Sik2	9	50892801	51009073	-	9539	protein_coding	salt inducible kinase 2 [Source:MGI Symbol;Acc:MGI:2445031]	-	371	474	447	423	431	304	316	369	293	373	1.68269	2.16705	1.83026	1.95688	2.09392	1.43442	1.47859	1.75114	1.46529	1.74364
ENSMUSG00000027322	23.0706	12.7518	10.5471	3.95852	6.24095	6.10169	4.02407	5.07336	2.15997	7.05514	1.211	0.0283962	1	Siglec1	2	131069220	131086765	-	7143	protein_coding	sialic acid binding Ig-like lectin 1, sialoadhesin [Source:MGI Symbol;Acc:MGI:99668]	-	24	13	12	4	6	6	4	5	2	7	0.145366	0.0793699	0.065616	0.0247119	0.0389274	0.0378074	0.0249945	0.0316874	0.013357	0.0436987
ENSMUSG00000053550	2555.07	2625.89	2966.37	2799.66	3042.46	2119.32	2125.72	2590.46	2087.61	2581.17	0.282044	0.000211569	0.158493	Shisa7	7	4825552	4844696	-	6639	protein_coding	shisa family member 7 [Source:MGI Symbol;Acc:MGI:3605641]	-	2658	2677	3375	2829	2925	2084	2113	2553	1933	2561	17.3215	17.5848	19.8555	18.8043	20.4178	14.1287	14.2057	17.4079	13.8895	17.2012
ENSMUSG00000022436	94.2048	119.671	117.776	116.776	147.702	61.0169	101.608	87.2618	112.319	103.811	0.354772	0.0341117	0.866907	Sh3bp1	15	78899768	78912051	+	2858	protein_coding	SH3-domain binding protein 1 [Source:MGI Symbol;Acc:MGI:104603]	-	98	122	134	118	142	60	101	86	104	103	1.48353	1.86162	1.83127	1.822	2.30256	0.94492	1.57733	1.36218	1.73592	1.60704
ENSMUSG00000042216	4625.65	4416.05	4965.93	4808.61	5685.5	3960	3801.74	4588.35	4457.1	4729.97	0.186002	0.0136641	0.70848	Sgsm1	5	113243220	113310786	-	7466	protein_coding	small G protein signaling modulator 1 [Source:MGI Symbol;Acc:MGI:107320]	-	4812	4502	5650	4859	5466	3894	3779	4522	4127	4693	27.885	26.2973	29.5576	28.7201	33.9287	23.4754	22.5919	27.4183	26.3697	28.0294
ENSMUSG00000017868	35.5671	19.6182	22.852	30.6785	29.1244	40.6779	44.2648	44.6456	25.9197	37.2914	-0.488841	0.0452599	0.915163	Sgk2	2	162987330	163014127	+	3412	protein_coding	serum/glucocorticoid regulated kinase 2 [Source:MGI Symbol;Acc:MGI:1351318]	-	37	20	26	31	28	40	44	44	24	37	0.469165	0.255631	0.297628	0.400941	0.380307	0.527663	0.575583	0.583769	0.335553	0.483552
ENSMUSG00000033720	3353.88	3035.91	2577.89	3124.26	2844.83	3429.15	3580.42	3089.68	3279.92	3284.67	-0.158041	0.018475	0.777813	Sfxn5	6	85213049	85333422	-	9635	protein_coding	sideroflexin 5 [Source:MGI Symbol;Acc:MGI:2137681]	-	3489	3095	2933	3157	2735	3372	3559	3045	3037	3259	15.6669	14.0088	11.8897	14.4594	13.155	15.7522	16.487	14.3065	15.0367	15.0828
ENSMUSG00000030683	8869.67	8913.52	9414.16	8779.99	9177.31	8419.32	8101.46	8960.57	8710.09	8585.09	0.0781473	0.0389695	0.894688	Sez6l2	7	126950563	126970606	+	4210	protein_coding	seizure related 6 homolog like 2 [Source:MGI Symbol;Acc:MGI:2385295]	-	9227	9087	10711	8872	8823	8279	8053	8831	8065	8518	94.8224	94.1307	99.3703	92.9966	97.1224	88.5119	85.3769	94.9566	91.3863	90.2207
ENSMUSG00000058153	6314.61	6242.5	6447.79	6229.71	5923.7	5170.17	5594.46	6124.56	5762.81	6163.17	0.11288	0.0279618	0.845499	Sez6l	5	112419151	112577185	-	6070	protein_coding	seizure related 6 homolog like [Source:MGI Symbol;Acc:MGI:1935121]	-	6569	6364	7336	6295	5695	5084	5561	6036	5336	6115	46.8213	45.723	47.2041	45.7651	43.4801	37.6984	40.8911	45.0151	41.9359	44.9219
ENSMUSG00000071528	2003.29	1906.89	1887.93	1857.53	1840.04	2136.61	2140.81	2091.24	2140.53	2149.8	-0.166517	2.54064e-05	0.0441639	Usmg5	19	47083471	47090625	-	341	protein_coding	upregulated during skeletal muscle growth 5 [Source:MGI Symbol;Acc:MGI:1891435]	-	2084	1944	2148	1877	1769	2101	2128	2061	1982	2133	264.409	248.619	246.03	242.906	240.413	277.318	278.536	273.603	277.273	278.925
ENSMUSG00000021091	1730.29	1623.4	2124.36	1403.29	1871.24	1164.41	1254.5	1321.1	1470.94	1442.27	0.396065	4.42156e-05	0.0640499	Serpina3n	12	104406729	104414329	+	2064	protein_coding	serine (or cysteine) peptidase inhibitor, clade A, member 3N [Source:MGI Symbol;Acc:MGI:105045]	-	1800	1655	2417	1418	1799	1145	1247	1302	1362	1431	37.7307	34.9688	45.7379	30.3176	40.3931	24.969	26.9663	28.5561	31.4794	30.9158
ENSMUSG00000021703	1245.81	1269.3	1182.15	1348.86	1202.42	1513.22	1447.66	1370.82	1365.1	1369.7	-0.177877	0.000878902	0.242507	Serinc5	13	92611091	92711947	+	6679	protein_coding	serine incorporator 5 [Source:MGI Symbol;Acc:MGI:2444223]	-	1296	1294	1345	1363	1156	1488	1439	1351	1264	1359	8.3951	8.4492	7.86538	9.00559	8.02106	10.0276	9.61643	9.15675	9.02806	9.07316
ENSMUSG00000036634	3755.7	4198.29	3541.19	3924.87	3472.05	5172.2	4589.45	4297.14	4417.14	4358.06	-0.273453	2.2863e-05	0.0441587	Mag	7	30899176	30914873	-	4072	protein_coding	myelin-associated glycoprotein [Source:MGI Symbol;Acc:MGI:96912]	-	3907	4280	4029	3966	3338	5086	4562	4235	4090	4324	41.5115	45.8383	38.6454	42.9806	37.9895	56.2179	50.0049	47.0807	47.9153	47.3509
ENSMUSG00000041571	5503.29	5171.35	4202.14	4777.93	4077.42	5141.69	5692.05	4810.56	6044.68	5426.41	-0.192229	0.0215436	0.819599	Selenow	7	15917208	15922402	-	736	protein_coding	selenoprotein W [Source:MGI Symbol;Acc:MGI:1100878]	-	5725	5272	4781	4828	3920	5056	5658	4741	5597	5384	336.535	312.385	253.717	289.479	246.828	309.197	343.123	291.601	362.774	326.195
ENSMUSG00000064373	4734.27	5921.75	5751.68	4802.67	5689.66	4763.39	4711.18	4922.18	4944.18	4553.59	0.170984	0.00920397	0.628017	Selenop	15	3268547	3280508	+	2842	protein_coding	selenoprotein P [Source:MGI Symbol;Acc:MGI:894288]	-	4925	6037	6544	4853	5470	4684	4683	4851	4578	4518	74.9747	92.6382	89.9349	75.3553	89.1967	74.182	73.547	77.2689	76.8441	70.888
ENSMUSG00000042682	1777.4	1583.19	1537.24	1630.91	1560.24	1730.85	1809.83	1662.03	1764.7	1756.73	-0.109108	0.0315656	0.856052	Selenok	14	29968308	29975662	+	1891	protein_coding	selenoprotein K [Source:MGI Symbol;Acc:MGI:1931466]	-	1849	1614	1749	1648	1500	1702	1799	1638	1634	1743	42.3037	37.2224	36.1249	38.4586	36.7608	40.5111	42.4624	39.2121	41.2211	41.1014
ENSMUSG00000020964	3406.75	3838.3	3662.48	3610.17	3542.78	3455.59	3351.05	3500.62	3283.16	3259.47	0.100098	0.0190763	0.795212	Sel1l	12	91806043	91849157	-	8555	protein_coding	sel-1 suppressor of lin-12-like (C. elegans) [Source:MGI Symbol;Acc:MGI:1329016]	-	3544	3913	4167	3648	3406	3398	3331	3450	3040	3234	17.9228	19.9472	19.0245	18.8175	18.4506	17.8776	17.3788	18.2556	16.9517	16.8566
ENSMUSG00000030082	923.784	1062.32	1028.34	1019.32	1001.67	899.999	954.711	908.132	873.709	972.601	0.127344	0.0232641	0.835536	Sec61a1	6	88503579	88518905	-	6732	protein_coding	Sec61 alpha 1 subunit (S. cerevisiae) [Source:MGI Symbol;Acc:MGI:1858417]	-	961	1083	1170	1030	963	885	949	895	809	965	6.17606	7.0158	6.78814	6.75182	6.6293	5.91705	6.29197	6.01833	5.73275	6.39196
ENSMUSG00000001052	1525.54	1490	1626.01	1682.37	1632.01	1432.88	1493.94	1417.5	1355.38	1483.59	0.147083	0.00369954	0.479919	Sec24b	3	129982759	130061553	-	6020	protein_coding	Sec24 related gene family, member B (S. cerevisiae) [Source:MGI Symbol;Acc:MGI:2139764]	-	1587	1519	1850	1700	1569	1409	1485	1397	1255	1472	11.4055	11.0041	12.0028	12.4618	12.0785	10.5347	11.0102	10.505	9.94503	10.9034
ENSMUSG00000061536	1083.36	1014.26	1095.14	1015.36	1112.97	893.898	948.675	1004.53	1017.35	1003.85	0.1286	0.0210438	0.819153	Sec22c	9	121680045	121705490	-	6119	protein_coding	SEC22 homolog C, vesicle trafficking protein [Source:MGI Symbol;Acc:MGI:2447871]	-	1127	1034	1246	1026	1070	879	943	990	942	996	7.96849	7.36941	7.95328	7.39937	8.1038	6.46568	6.87853	7.32406	7.34394	7.25821
ENSMUSG00000003585	497.94	479.664	450.888	416.634	464.951	525.762	576.448	527.63	517.313	506.962	-0.200542	0.00415387	0.486127	Sec14l2	11	4097039	4123415	-	3505	protein_coding	SEC14-like lipid binding 2 [Source:MGI Symbol;Acc:MGI:1915065]	-	518	489	513	421	447	517	573	520	479	503	6.39402	6.08434	5.71661	5.30056	5.91024	6.63909	7.29678	6.71603	6.51938	6.39927
ENSMUSG00000024516	1067.98	985.813	985.275	984.681	908.058	1162.37	1212.25	1056.27	1194.46	1079.44	-0.209483	0.000508565	0.214037	Sec11c	18	65800549	65817665	+	3084	protein_coding	SEC11 homolog C, signal peptidase complex subunit [Source:MGI Symbol;Acc:MGI:1913536]	-	1111	1005	1121	995	873	1143	1205	1041	1106	1071	15.5859	14.2117	14.1971	14.2376	13.1185	16.6816	17.4396	15.2804	17.108	15.4855
ENSMUSG00000064057	0	20.5991	43.0673	9.89629	23.9236	0	2.01204	3.04402	0	0	4.26311	0.00258384	0.431873	Scgb3a1	11	49663610	49665118	+	598	protein_coding	secretoglobin, family 3A, member 1 [Source:MGI Symbol;Acc:MGI:1915912]	-	0	21	49	10	23	0	2	3	0	0	0	1.53148	3.2004	0.737949	1.78243	0	0.149277	0.2271	0	0
ENSMUSG00000037071	5335.07	4859.42	4925.49	5509.26	4794.09	5686.78	5589.43	6031.21	5955.04	5657.21	-0.185849	0.000119984	0.122687	Scd1	19	44394451	44407709	-	4836	protein_coding	stearoyl-Coenzyme A desaturase 1 [Source:MGI Symbol;Acc:MGI:98239]	-	5550	4954	5604	5567	4609	5592	5556	5944	5514	5613	49.6523	44.6748	45.2606	50.7999	44.1678	52.0459	51.2791	55.6404	54.3925	51.7558
ENSMUSG00000045107	116.314	124.575	143.265	101.932	109.217	80.3389	91.5476	102.482	117.718	93.7325	0.29759	0.0374822	0.887644	Saysd1	14	20075636	20138534	-	2511	protein_coding	SAYSVFN motif domain containing 1 [Source:MGI Symbol;Acc:MGI:1914759]	-	121	127	163	103	105	79	91	101	109	93	2.08483	2.20572	2.53542	1.81016	1.93788	1.41608	1.61756	1.82084	2.0708	1.65153
ENSMUSG00000050132	667.124	772.956	700.503	642.269	724.99	639.661	616.689	659.537	575.633	655.12	0.15614	0.0209577	0.819153	Sarm1	11	78472330	78497754	-	5629	protein_coding	sterile alpha and HEAT/Armadillo motif containing 1 [Source:MGI Symbol;Acc:MGI:2136419]	-	694	788	797	649	697	629	613	650	533	650	5.3341	6.10503	5.53014	5.08793	5.73835	5.02951	4.86064	5.22732	4.51705	5.14912
ENSMUSG00000001025	145.152	113.785	172.269	132.61	143.542	232.881	156.939	156.26	197.637	184.441	-0.389572	0.00530046	0.509049	S100a6	3	90612882	90624181	+	1367	protein_coding	S100 calcium binding protein A6 (calcyclin) [Source:MGI Symbol;Acc:MGI:1339467]	-	151	116	196	134	138	229	156	154	183	183	4.77904	3.70069	5.60011	4.32577	4.67838	7.54003	5.09355	5.09976	6.38619	5.96944
ENSMUSG00000074457	996.841	1000.53	948.36	906.5	905.978	1014.91	1109.64	1015.69	1158.83	1044.16	-0.166668	0.00415353	0.486127	S100a16	3	90537254	90543151	+	1617	protein_coding	S100 calcium binding protein A16 [Source:MGI Symbol;Acc:MGI:1915110]	-	1037	1020	1079	916	871	998	1103	1001	1073	1036	27.7461	27.5095	26.0628	24.9984	24.9628	27.7796	30.446	28.0234	31.6555	28.5694
ENSMUSG00000061815	22.1093	35.3127	24.6099	28.6992	20.8032	9.15254	17.1023	19.2788	12.9598	11.0866	0.917945	0.00306211	0.447299	Rufy4	1	74125541	74148223	+	2329	protein_coding	RUN and FYVE domain containing 4 [Source:MGI Symbol;Acc:MGI:3588214]	-	23	36	28	29	20	9	17	19	12	11	0.427259	0.674102	0.469567	0.549485	0.397966	0.173932	0.325795	0.369302	0.245794	0.210608
ENSMUSG00000050896	1.92255	3.92363	0.878925	5.93777	3.12047	70.1694	17.1023	2.02934	1.07999	2.01575	-2.55477	0.025801	0.845499	Rtn4rl2	2	84871924	84886710	-	1506	protein_coding	reticulon 4 receptor-like 2 [Source:MGI Symbol;Acc:MGI:2669796]	-	2	4	1	6	3	69	17	2	1	2	0.0574563	0.115832	0.0259349	0.175814	0.092317	2.0622	0.503835	0.0601177	0.0316763	0.0592183
ENSMUSG00000037266	6769.29	6157.16	6270.25	6386.07	6119.25	7589.49	6823.82	6685.68	6617.07	6356.68	-0.104027	0.0431317	0.905032	Rsrp1	4	134923592	134927671	+	3349	protein_coding	arginine/serine rich protein 1 [Source:MGI Symbol;Acc:MGI:106498]	-	7042	6277	7134	6453	5883	7463	6783	6589	6127	6307	90.9732	81.7391	83.2007	85.0304	81.4084	100.301	90.4006	89.0639	87.2754	83.9766
ENSMUSG00000031293	2.88382	3.92363	3.5157	3.95852	4.16063	12.2034	6.03611	6.08803	10.7999	9.07089	-1.26205	0.0170565	1	Rs1	X	160768013	160799663	+	5840	protein_coding	retinoschisis (X-linked, juvenile) 1 (human) [Source:MGI Symbol;Acc:MGI:1336189]	-	3	4	4	4	4	12	6	6	10	9	0.022225	0.0298703	0.026752	0.0302256	0.0317419	0.0924856	0.0458567	0.0465089	0.0816857	0.0687196
ENSMUSG00000058838	14.4191	10.79	8.78925	4.94814	7.28111	13.2203	24.1444	17.2494	18.3598	19.1497	-0.991667	0.00719728	0.568683	Rps27a-ps2	9	83409660	83410126	+	467	processed_pseudogene	ribosomal protein S27A, pseudogene 2 [Source:MGI Symbol;Acc:MGI:3643614]	-	15	11	10	5	7	13	24	17	17	19	1.38965	1.02723	0.836358	0.472477	0.694651	1.25295	2.29382	1.64789	1.73656	1.81421
ENSMUSG00000025290	4140.21	3754.92	3949.89	3736.84	4212.64	4347.45	4106.56	4323.52	4528.38	3956.92	-0.103187	0.0433209	0.905032	Rps24	14	24487125	24496959	+	6256	protein_coding	ribosomal protein S24 [Source:MGI Symbol;Acc:MGI:98147]	-	4307	3828	4494	3776	4050	4275	4082	4261	4193	3926	29.7859	26.6851	28.0573	26.6356	30.0015	30.7571	29.1233	30.8327	31.9733	27.9836
ENSMUSG00000061787	2049.44	1861.76	1819.37	1794.2	1892.05	1973.9	2008.01	1907.58	2118.93	2084.29	-0.099944	0.0468179	0.916309	Rps17	7	81342732	81345254	-	1274	protein_coding	ribosomal protein S17 [Source:MGI Symbol;Acc:MGI:1309526]	-	2132	1898	2070	1813	1819	1941	1996	1880	1962	2068	72.402	64.971	63.4614	62.7995	66.1681	68.5744	69.9287	66.8014	73.4664	72.3822
ENSMUSG00000048758	2285.91	2019.69	1901.99	2062.39	2013.75	2398.98	2125.72	2042.54	2517.45	2208.26	-0.134973	0.0426522	0.905032	Rpl29	9	106429454	106431568	+	1126	protein_coding	ribosomal protein L29 [Source:MGI Symbol;Acc:MGI:99687]	-	2378	2059	2164	2084	1936	2359	2113	2013	2331	2191	91.3705	79.7464	75.0633	81.6746	79.6805	94.2965	83.7579	80.9287	98.7558	86.767
ENSMUSG00000059070	2123.45	1792.12	1941.54	1843.68	1811.96	2131.52	1974.81	2025.29	2411.61	2265.71	-0.183874	0.00540409	0.51183	Rpl18	7	45715457	45720836	+	4043	protein_coding	ribosomal protein L18 [Source:MGI Symbol;Acc:MGI:98003]	-	2209	1827	2209	1863	1742	2096	1963	1996	2233	2248	23.6387	19.7073	21.3403	20.3346	19.9678	23.3342	21.6711	22.3488	26.3478	24.7938
ENSMUSG00000028174	0	0	0	0	1.04016	2.0339	1.00602	5.07336	2.15997	2.01575	-3.20899	0.0143531	1	Rpe65	3	159599175	159625321	+	1934	protein_coding	retinal pigment epithelium 65 [Source:MGI Symbol;Acc:MGI:98001]	-	0	0	0	0	1	2	1	5	2	2	0	0	0	0	0.0239623	0.0465457	0.0230785	0.117034	0.0493324	0.0461131
ENSMUSG00000028884	143.23	160.869	166.996	180.112	148.743	199.322	200.198	177.568	205.197	171.339	-0.252202	0.0178327	0.774253	Rpa2	4	132768332	132778752	+	2993	protein_coding	replication protein A2 [Source:MGI Symbol;Acc:MGI:1339939]	-	149	164	190	182	143	196	199	175	190	170	2.15383	2.38963	2.47945	2.68344	2.21419	2.94751	2.96764	2.64685	3.02835	2.53275
ENSMUSG00000028677	3890.27	3911.86	3658.09	3934.76	3371.15	4103.39	4307.77	3862.86	3961.39	3962.97	-0.106057	0.041081	0.905032	Rnf220	4	117271463	117497052	-	8239	protein_coding	ring finger protein 220 [Source:MGI Symbol;Acc:MGI:1913993]	-	4047	3988	4162	3976	3241	4035	4282	3807	3668	3932	21.2516	21.1093	19.7304	21.2961	18.2301	22.0432	23.1973	20.9173	21.238	21.2809
ENSMUSG00000020376	814.199	863.2	840.252	872.853	824.845	866.44	920.506	878.706	1003.31	943.373	-0.12941	0.0219259	0.819599	Rnf130	11	50025346	50104758	+	1558	protein_coding	ring finger protein 130 [Source:MGI Symbol;Acc:MGI:1891717]	-	847	880	956	882	793	852	915	866	929	936	23.5206	24.6325	23.9662	24.9821	23.588	24.6138	26.2131	25.1622	28.4451	26.7892
ENSMUSG00000052656	956.467	991.699	1013.4	960.93	1050.56	810.508	905.416	984.232	932.028	900.034	0.133913	0.0253306	0.845499	Rnf103	6	71493894	71510881	+	6602	protein_coding	ring finger protein 103 [Source:MGI Symbol;Acc:MGI:109483]	-	995	1011	1153	971	1010	797	900	970	863	893	6.52049	6.67834	6.82123	6.4904	7.08975	5.43361	6.08459	6.6511	6.23583	6.03152
ENSMUSG00000019763	410.464	612.087	451.767	462.157	478.473	417.966	430.576	387.605	372.595	406.174	0.260497	0.00857375	0.618413	Rmnd1	10	4401915	4432388	-	5894	protein_coding	required for meiotic nuclear division 1 homolog [Source:MGI Symbol;Acc:MGI:1913334]	-	427	624	514	467	460	411	428	382	345	403	3.13437	4.61708	3.40613	3.49651	3.61687	3.13861	3.24114	2.93394	2.79234	3.04892
ENSMUSG00000039194	159.571	127.518	139.749	170.216	154.984	169.83	190.137	182.641	196.557	192.504	-0.309888	0.00432252	0.486127	Rlbp1	7	79374870	79387048	-	2954	protein_coding	retinaldehyde binding protein 1 [Source:MGI Symbol;Acc:MGI:97930]	-	166	130	159	172	149	167	189	180	182	191	2.43125	1.91922	2.1023	2.56948	2.33755	2.54456	2.85572	2.75841	2.93914	2.88319
ENSMUSG00000022580	284.537	253.074	314.655	249.386	307.887	248.135	242.45	241.492	231.117	260.032	0.204929	0.0279363	0.845499	Rhpn1	15	75704280	75715485	+	4302	protein_coding	rhophilin, Rho GTPase binding protein 1 [Source:MGI Symbol;Acc:MGI:1098783]	-	296	258	358	252	296	244	241	238	214	258	2.97683	2.61542	3.25029	2.58498	3.18865	2.55285	2.50041	2.5044	2.37302	2.67424
ENSMUSG00000073982	466.218	493.397	447.373	474.032	404.621	618.305	577.454	488.057	529.193	489.828	-0.241607	0.00399275	0.486127	Rhog	7	102239123	102256054	-	1420	protein_coding	ras homolog family member G [Source:MGI Symbol;Acc:MGI:1928370]	-	485	503	509	479	389	608	574	481	490	486	14.777	15.448	14.0003	14.8859	12.6954	19.2717	18.0421	15.334	16.4614	15.2615
ENSMUSG00000023755	159.571	130.461	130.081	129.641	115.458	164.746	156.939	157.274	167.398	138.079	-0.236051	0.0443082	0.91257	Rhebl1	15	98877778	98894540	-	3035	protein_coding	Ras homolog enriched in brain like 1 [Source:MGI Symbol;Acc:MGI:1916409]	-	166	133	148	131	111	162	156	155	155	137	2.36637	1.91111	1.90464	1.90476	1.69492	2.40249	2.2942	2.31191	2.43631	2.01286
ENSMUSG00000043333	15.3804	15.6945	13.1839	12.8652	12.4819	21.3559	25.1504	17.2494	23.7597	21.1654	-0.641664	0.0315765	0.856052	Rhbdl2	4	123787874	123829904	+	3070	protein_coding	rhomboid like 2 [Source:MGI Symbol;Acc:MGI:3608413]	-	16	16	15	13	12	21	25	17	22	21	0.225483	0.227287	0.190837	0.186867	0.181146	0.307884	0.363468	0.250673	0.341856	0.305022
ENSMUSG00000039917	2341.66	2201.16	2323	2222.71	2451.65	2008.47	1958.72	2191.69	2195.61	2136.7	0.13754	0.00572179	0.523484	Rhbdd2	5	135632618	135646448	+	7534	protein_coding	rhomboid domain containing 2 [Source:MGI Symbol;Acc:MGI:1915612]	-	2436	2244	2643	2246	2357	1975	1947	2160	2033	2120	13.9889	12.9894	13.7019	13.1556	14.4984	11.7991	11.5347	12.9785	12.8727	12.5476
ENSMUSG00000020599	775.748	642.495	774.333	734.305	898.696	620.339	633.791	669.684	685.791	754.9	0.184957	0.0310525	0.856052	Rgs9	11	109225355	109298129	-	6390	protein_coding	regulator of G-protein signaling 9 [Source:MGI Symbol;Acc:MGI:1338824]	-	807	655	881	742	864	610	630	660	635	749	5.46393	4.47027	5.38498	5.12425	6.26611	4.2967	4.40052	4.67563	4.74058	5.22675
ENSMUSG00000052087	240.318	176.564	195.121	213.76	203.871	169.83	180.077	180.612	198.717	158.237	0.215058	0.0478518	0.921416	Rgs14	13	55369732	55384687	+	4239	protein_coding	regulator of G-protein signaling 14 [Source:MGI Symbol;Acc:MGI:1859709]	-	250	180	222	216	196	167	179	178	184	157	2.55158	1.85183	2.04549	2.24863	2.14278	1.77321	1.88475	1.90088	2.07068	1.65153
ENSMUSG00000026482	1450.56	1397.79	1526.69	1329.07	1439.58	1160.34	1291.73	1442.86	1284.1	1359.63	0.12793	0.0408718	0.905032	Rgl1	1	152516760	152766351	-	6907	protein_coding	ral guanine nucleotide dissociation stimulator,-like 1 [Source:MGI Symbol;Acc:MGI:107484]	-	1509	1425	1737	1343	1384	1141	1284	1422	1189	1349	9.45219	8.99743	9.82244	8.58053	9.28607	7.43536	8.29737	9.31982	8.21205	8.7091
ENSMUSG00000029048	940.126	940.691	903.535	925.303	972.548	1016.95	972.819	1010.61	1036.79	997.798	-0.105188	0.0295038	0.851934	Rer1	4	155074110	155086382	-	1814	protein_coding	retention in endoplasmic reticulum sorting receptor 1 [Source:MGI Symbol;Acc:MGI:1915080]	-	978	959	1028	935	935	1000	967	996	960	990	23.3257	23.0555	22.1342	22.7458	23.8869	24.8124	23.7933	24.8553	25.246	24.336
ENSMUSG00000059713	1970.61	2121.71	2145.46	2187.08	2087.6	1793.9	1834.98	2060.8	2020.65	2047	0.107678	0.0438492	0.909409	Rcan3	4	135412308	135433853	-	5111	protein_coding	regulator of calcineurin 3 [Source:MGI Symbol;Acc:MGI:1858220]	-	2050	2163	2441	2210	2007	1764	1824	2031	1871	2031	17.3532	18.4563	18.6539	19.0816	18.1981	15.5345	15.9288	17.9888	17.4633	17.7196
ENSMUSG00000031107	85.5534	89.2627	70.314	83.1288	92.5741	101.695	99.5958	105.526	96.1188	108.851	-0.286299	0.0338701	0.862025	Rbmx2	X	48695004	48710723	+	1872	protein_coding	RNA binding motif protein, X-linked 2 [Source:MGI Symbol;Acc:MGI:1919414]	-	89	91	80	84	89	100	99	104	89	108	2.05692	2.11996	1.66914	1.98016	2.20328	2.40436	2.36045	2.51492	2.268	2.57258
ENSMUSG00000031167	1242.93	1178.07	1087.23	1101.46	1009.99	1133.9	1369.19	1252.11	1313.26	1282.02	-0.176102	0.00909308	0.628017	Rbm3	X	8138975	8145880	-	4698	protein_coding	RNA binding motif (RNP1, RRM) protein 3 [Source:MGI Symbol;Acc:MGI:1099460]	-	1293	1201	1237	1113	971	1115	1361	1234	1216	1272	11.9074	11.1487	10.2841	10.4547	9.57837	10.6824	12.9303	11.8905	12.3475	12.0733
ENSMUSG00000006456	444.108	558.137	511.534	436.426	509.677	448.474	403.413	429.206	464.394	453.545	0.162138	0.0471254	0.916309	Rbm14	19	4800569	4811634	-	3910	protein_coding	RNA binding motif protein 14 [Source:MGI Symbol;Acc:MGI:1929092]	-	462	569	582	441	490	441	401	423	430	450	5.11208	6.34641	5.81373	4.97725	5.80771	5.07654	4.57754	4.89735	5.24627	5.132
ENSMUSG00000033565	5189.92	5640.22	5298.16	5454.83	5324.57	4914.91	5005.94	5215.42	5051.09	5177.46	0.0851144	0.0184025	0.777813	Rbfox2	15	77078990	77307004	-	8140	protein_coding	RNA binding protein, fox-1 homolog (C. elegans) 2 [Source:MGI Symbol;Acc:MGI:1933973]	-	5399	5750	6028	5512	5119	4833	4976	5140	4677	5137	28.696	30.8061	28.924	29.8822	29.1438	26.7238	27.2848	28.5849	27.4095	28.1408
ENSMUSG00000030589	26.9157	12.7518	21.0942	16.8237	20.8032	31.5254	36.2166	34.4989	29.1596	28.2205	-0.69675	0.00793403	0.59964	Rasgrp4	7	29134851	29153961	+	6363	protein_coding	RAS guanyl releasing protein 4 [Source:MGI Symbol;Acc:MGI:2386851]	-	28	13	24	17	20	31	36	34	27	28	0.190383	0.0890993	0.147319	0.1179	0.145664	0.219283	0.252525	0.241888	0.202423	0.196222
ENSMUSG00000032413	570.035	665.056	836.736	633.362	692.745	606.101	598.581	618.95	599.392	584.568	0.176979	0.0449306	0.913484	Rasa2	9	96539300	96631617	-	15856	protein_coding	RAS p21 protein activator 2 [Source:MGI Symbol;Acc:MGI:2149960]	-	593	678	952	640	666	596	595	610	555	580	1.61806	1.86479	2.34505	1.7812	1.94655	1.69184	1.6749	1.74154	1.66978	1.63112
ENSMUSG00000003380	3248.14	3047.68	3065.69	3066.86	2970.69	3172.88	3189.08	3141.43	3646.03	3369.33	-0.100974	0.0419884	0.905032	Rabac1	7	24969752	24972754	-	1523	protein_coding	Rab acceptor 1 (prenylated) [Source:MGI Symbol;Acc:MGI:1201692]	-	3379	3107	3488	3099	2856	3120	3170	3096	3376	3343	95.9889	88.9681	89.451	89.7944	86.9048	92.2063	92.9018	92.0234	105.745	97.8785
ENSMUSG00000043463	1485.17	1472.34	1806.19	1599.24	1778.67	1274.24	1246.46	1661.02	1603.78	1425.14	0.175444	0.0476221	0.921416	Rab9b	X	136858147	136868755	-	3980	protein_coding	RAB9B, member RAS oncogene family [Source:MGI Symbol;Acc:MGI:2442454]	-	1545	1501	2055	1616	1710	1253	1239	1637	1485	1414	16.7949	16.4471	20.1668	17.9178	19.9112	14.1701	13.8948	18.6193	17.7993	15.8423
ENSMUSG00000017831	1803.35	1826.45	1824.65	1751.64	1744.34	1872.2	1893.33	1890.33	1879.18	1913.96	-0.0778917	0.0408552	0.905032	Rab5a	17	53479234	53507680	+	5270	protein_coding	RAB5A, member RAS oncogene family [Source:MGI Symbol;Acc:MGI:105926]	-	1876	1862	2076	1770	1677	1841	1882	1863	1740	1899	15.4012	15.4086	15.386	14.8214	14.7471	15.7235	15.9395	16.0029	15.7506	16.0681
ENSMUSG00000030643	503.707	579.717	547.57	573.985	527.36	600	657.936	588.51	590.752	568.442	-0.137652	0.0391817	0.894688	Rab30	7	92741603	92844535	+	9642	protein_coding	RAB30, member RAS oncogene family [Source:MGI Symbol;Acc:MGI:1923235]	-	524	591	623	580	507	590	654	580	547	564	2.35124	2.67309	2.52365	2.65453	2.43684	2.75417	3.02744	2.72307	2.70632	2.60833
ENSMUSG00000062078	4566.05	5082.09	4773.44	5184.67	4483.08	5875.93	5540.14	5158.59	5106.17	4986.97	-0.146716	0.0114309	0.67732	Qk	17	10202601	10319854	-	14242	protein_coding	quaking [Source:MGI Symbol;Acc:MGI:97837]	-	4750	5181	5431	5239	4310	5778	5507	5084	4728	4948	14.4296	15.8648	14.8942	16.2332	14.0246	18.2605	17.2587	16.1596	15.8367	15.4921
ENSMUSG00000015806	2935.73	2681.8	2596.34	3035.19	2599.35	3471.86	3421.47	3268.26	3592.03	3345.14	-0.304159	1.57046e-08	0.000136496	Qdpr	5	45434021	45450236	-	1788	protein_coding	quinoid dihydropteridine reductase [Source:MGI Symbol;Acc:MGI:97836]	-	3054	2734	2954	3067	2499	3414	3401	3221	3326	3319	73.8982	66.6843	64.5285	75.6962	64.7715	85.9413	84.8992	81.5494	88.7388	82.7733
ENSMUSG00000032648	951.661	1313.44	1181.27	789.724	1111.93	882.711	910.446	984.232	923.388	805.293	0.247345	0.0236612	0.837682	Pygm	19	6384399	6398459	+	3218	protein_coding	muscle glycogen phosphorylase [Source:MGI Symbol;Acc:MGI:97830]	-	990	1339	1344	798	1069	868	905	970	855	799	13.3101	18.1463	16.3126	10.9432	15.3949	12.1406	12.5524	13.6453	12.6747	11.0716
ENSMUSG00000021069	237.435	250.132	258.404	211.781	239.236	185.085	209.252	234.389	217.077	184.441	0.217808	0.0293013	0.848908	Pygl	12	70190811	70231488	-	6895	protein_coding	liver glycogen phosphorylase [Source:MGI Symbol;Acc:MGI:97829]	-	247	255	294	214	230	182	208	231	201	183	1.54987	1.61287	1.66541	1.36964	1.54589	1.18807	1.34646	1.51661	1.39066	1.1835
ENSMUSG00000026204	13798.1	12264.3	13378.1	13187.8	13398.3	11043	11759.3	12620.5	12613.2	13302	0.106285	0.046014	0.916309	Ptprn	1	75247027	75264502	-	4249	protein_coding	protein tyrosine phosphatase, receptor type, N [Source:MGI Symbol;Acc:MGI:102765]	-	14354	12503	15221	13326	12881	10859	11689	12438	11679	13198	146.157	128.328	139.915	138.401	140.491	115.029	122.788	132.514	131.123	138.507
ENSMUSG00000033295	2793.46	2509.16	2860.02	2925.34	2930.12	2405.08	2421.48	2650.32	2547.69	2795.85	0.128802	0.025755	0.845499	Ptprf	4	118208213	118291405	-	9148	protein_coding	protein tyrosine phosphatase, receptor type, F [Source:MGI Symbol;Acc:MGI:102695]	-	2906	2558	3254	2956	2817	2365	2407	2612	2359	2774	13.7436	12.1946	13.8931	14.2596	14.2707	11.6362	11.744	12.9254	12.3016	13.5217
ENSMUSG00000036057	2260.92	2203.12	2212.25	2142.55	2400.68	1957.63	2046.24	2106.46	1893.22	2282.84	0.124884	0.0260799	0.845499	Ptpn23	9	110385082	110408213	-	5619	protein_coding	protein tyrosine phosphatase, non-receptor type 23 [Source:MGI Symbol;Acc:MGI:2144837]	-	2352	2246	2517	2165	2308	1925	2034	2076	1753	2265	18.1097	17.4319	17.4958	17.003	19.0354	15.4198	16.1568	16.725	14.8827	17.9746
ENSMUSG00000029838	3497.11	2724.96	2452.2	3259.84	2523.42	3656.95	3551.24	3172.88	3592.03	3193.96	-0.247844	0.00625008	0.529976	Ptn	6	36714929	36810220	-	3433	protein_coding	pleiotrophin [Source:MGI Symbol;Acc:MGI:97804]	-	3638	2778	2790	3294	2426	3596	3530	3127	3326	3169	45.8481	35.29	31.7424	42.3426	32.7493	47.1468	45.895	41.2336	46.2176	41.1623
ENSMUSG00000030122	7233.58	6814.37	5764.87	6184.19	5573.17	7369.83	7751.37	6559.86	7289.91	7201.28	-0.196312	0.00567607	0.522048	Ptms	6	124913681	124920103	-	1619	protein_coding	parathymosin [Source:MGI Symbol;Acc:MGI:1916452]	-	7525	6947	6559	6249	5358	7247	7705	6465	6750	7145	201.091	187.13	158.234	170.33	153.37	201.473	212.418	180.767	198.891	196.791
ENSMUSG00000026238	4771.76	4381.72	4184.56	4204.93	4095.1	5103.05	4793.67	4495	4664.46	4582.82	-0.127566	0.0143381	0.718669	Ptma	1	86526726	86530712	+	1462	protein_coding	prothymosin alpha [Source:MGI Symbol;Acc:MGI:97803]	-	4964	4467	4761	4249	3937	5018	4765	4430	4319	4547	146.898	133.248	127.192	128.253	124.797	154.486	145.472	137.168	140.927	138.685
ENSMUSG00000038751	0	0.980909	0.878925	0	0	11.1864	1.00602	0	1.07999	3.02363	-3.04072	0.0299913	1	Ptk6	2	181193721	181202789	-	3689	protein_coding	PTK6 protein tyrosine kinase 6 [Source:MGI Symbol;Acc:MGI:99683]	-	0	1	1	0	0	11	1	0	1	3	0	0.0118218	0.0105877	0	0	0.134212	0.0120992	0	0.0129315	0.036263
ENSMUSG00000021466	2675.22	3071.23	2950.55	2694.76	2758.5	2571.86	2604.58	2738.6	2588.73	2518.68	0.120003	0.0149862	0.733816	Ptch1	13	63508328	63573598	-	14185	protein_coding	patched 1 [Source:MGI Symbol;Acc:MGI:105373]	-	2783	3131	3357	2723	2652	2529	2589	2699	2397	2499	8.48822	9.62602	9.24338	8.47122	8.66422	8.02464	8.14643	8.61333	8.06116	7.85575
ENSMUSG00000029446	207.635	206.972	180.18	152.403	209.072	223.729	230.378	241.492	245.157	198.552	-0.253	0.0204263	0.817511	Psph	5	129765558	129787449	-	4329	protein_coding	phosphoserine phosphatase [Source:MGI Symbol;Acc:MGI:97788]	-	216	211	205	154	201	220	229	238	227	197	2.15873	2.12563	1.84959	1.56986	2.15176	2.28739	2.36109	2.48878	2.50148	2.02922
ENSMUSG00000024537	231.667	261.903	255.767	251.366	216.353	293.898	289.733	262.8	298.076	285.229	-0.2307	0.00776313	0.597109	Psmg2	18	67641599	67654162	+	1059	protein_coding	proteasome (prosome, macropain) assembly chaperone 2 [Source:MGI Symbol;Acc:MGI:1922901]	-	241	267	291	254	208	289	288	259	276	283	9.84586	10.9953	10.7326	10.5844	9.10233	12.2831	12.1384	11.0714	12.4329	11.9163
ENSMUSG00000005625	1604.37	1458.61	1479.23	1620.02	1609.12	1709.49	1729.34	1570.71	1806.82	1688.19	-0.130244	0.013759	0.70848	Psmd4	3	95032694	95042614	-	2808	protein_coding	proteasome (prosome, macropain) 26S subunit, non-ATPase, 4 [Source:MGI Symbol;Acc:MGI:1201670]	-	1669	1487	1683	1637	1547	1681	1719	1548	1673	1675	25.7153	23.0944	23.4097	25.7264	25.5316	26.9449	27.3239	24.9558	28.4222	26.5992
ENSMUSG00000026914	1078.55	1007.39	1004.61	1025.26	1116.09	1121.69	1091.53	1195.28	1268.98	1179.22	-0.162893	0.0041396	0.486127	Psmd14	2	61711694	61800376	+	2820	protein_coding	proteasome (prosome, macropain) 26S subunit, non-ATPase, 14 [Source:MGI Symbol;Acc:MGI:1913284]	-	1122	1027	1143	1036	1073	1103	1085	1178	1175	1170	17.2138	15.8823	15.8309	16.2121	17.6334	17.6048	17.173	18.9101	19.8769	18.5007
ENSMUSG00000020720	1253.5	1208.48	1235.77	1220.21	1260.67	1254.91	1304.81	1293.71	1402.9	1337.45	-0.0935518	0.0448056	0.913452	Psmd12	11	107479484	107504362	+	2649	protein_coding	proteasome (prosome, macropain) 26S subunit, non-ATPase, 12 [Source:MGI Symbol;Acc:MGI:1914247]	-	1304	1232	1406	1233	1212	1234	1297	1275	1299	1327	21.2975	20.2825	20.7306	20.5404	21.2034	20.9671	21.8536	21.7884	23.393	22.3378
ENSMUSG00000020708	2808.84	2757.33	2577.89	2637.36	2573.35	2952.2	2929.52	2901.96	3163.28	2797.87	-0.142669	0.00185563	0.366492	Psmc5	11	106256154	106263120	+	1394	protein_coding	protease (prosome, macropain) 26S subunit, ATPase 5 [Source:MGI Symbol;Acc:MGI:105047]	-	2922	2811	2933	2665	2474	2903	2912	2860	2929	2776	90.688	87.9409	82.1785	84.3649	82.2474	93.7325	93.2381	92.8754	100.234	88.7989
ENSMUSG00000002102	1825.46	1818.6	1606.67	1693.25	1625.77	1878.3	1909.42	1789.88	2017.41	1805.11	-0.133313	0.0143874	0.718669	Psmc3	2	91054009	91066369	+	2607	protein_coding	proteasome (prosome, macropain) 26S subunit, ATPase 3 [Source:MGI Symbol;Acc:MGI:1098754]	-	1899	1854	1828	1711	1563	1847	1898	1764	1868	1791	31.5149	31.0143	27.387	28.9625	27.7845	31.8883	32.4952	30.6306	34.1818	30.6341
ENSMUSG00000069744	973.77	844.562	913.203	895.614	909.098	962.033	1004.01	952.777	1055.15	940.349	-0.114949	0.0425094	0.905032	Psmb3	11	97703399	97713500	+	2300	protein_coding	proteasome (prosome, macropain) subunit, beta type 3 [Source:MGI Symbol;Acc:MGI:1347014]	-	1013	861	1039	905	874	946	998	939	977	933	19.0552	16.3256	17.644	17.3639	17.6104	18.5127	19.3672	18.4814	20.264	18.0886
ENSMUSG00000028837	908.404	820.04	730.387	788.734	780.118	846.101	913.464	872.618	886.669	875.845	-0.126188	0.0460528	0.916309	Psmb2	4	126677630	126709714	+	1204	protein_coding	proteasome (prosome, macropain) subunit, beta type 2 [Source:MGI Symbol;Acc:MGI:1347045]	-	945	836	831	797	750	832	908	860	821	869	33.9577	30.2812	26.9577	29.2119	28.8682	31.103	33.6608	32.3347	32.5294	32.1843
ENSMUSG00000036743	8.65146	9.80909	6.15247	8.90666	8.32126	5.08474	7.04212	3.04402	1.07999	1.00788	1.26655	0.0278547	1	Psma8	18	14706151	14762299	+	1693	protein_coding	proteasome (prosome, macropain) subunit, alpha type, 8 [Source:MGI Symbol;Acc:MGI:1920927]	-	9	10	7	9	8	5	7	3	1	1	0.229995	0.257594	0.161492	0.234592	0.218987	0.132929	0.184546	0.0802161	0.0281775	0.0263387
ENSMUSG00000015671	1381.35	1396.81	1287.62	1314.23	1314.76	1318.98	1458.73	1551.43	1483.9	1521.89	-0.131863	0.0145202	0.719163	Psma2	13	14613240	14674236	+	3673	protein_coding	proteasome (prosome, macropain) subunit, alpha type 2 [Source:MGI Symbol;Acc:MGI:104885]	-	1437	1424	1465	1328	1264	1297	1450	1529	1374	1510	16.9265	16.9076	15.5785	15.9553	15.9482	15.8937	17.6202	18.8445	17.8453	18.3319
ENSMUSG00000036835	603.68	613.068	598.548	585.86	606.412	717.966	634.797	667.654	728.991	605.734	-0.157258	0.0159626	0.758134	Psenen	7	30561863	30563627	-	1275	protein_coding	presenilin enhancer gamma secretase subunit [Source:MGI Symbol;Acc:MGI:1913590]	-	628	625	681	592	583	706	631	658	675	601	21.3099	21.3778	20.8615	20.4899	21.1906	24.923	22.0894	23.3622	25.2553	21.0191
ENSMUSG00000044664	1.92255	0.980909	0.878925	4.94814	2.08032	0	0	1.01467	0	0	2.9361	0.031349	1	Prss42	9	110798166	110803754	+	1584	protein_coding	protease, serine 42 [Source:MGI Symbol;Acc:MGI:2665280]	-	2	1	1	5	2	0	0	1	0	0	0.054627	0.027532	0.0246578	0.139297	0.058514	0	0	0.0285787	0	0
ENSMUSG00000045114	31.722	40.2173	45.7041	44.5333	52.0079	30.5085	30.1805	36.5282	18.3598	31.2442	0.540191	0.0202213	0.817511	Prrt2	7	127017531	127021211	-	3159	protein_coding	proline-rich transmembrane protein 2 [Source:MGI Symbol;Acc:MGI:1916267]	-	33	41	52	45	50	30	30	36	17	31	0.451957	0.566014	0.642928	0.628623	0.733509	0.427442	0.423874	0.515882	0.256719	0.437585
ENSMUSG00000015476	2388.77	2669.05	2535.7	2290	2442.29	2316.61	2296.74	2295.19	2251.77	2308.04	0.104126	0.0252575	0.845499	Prrt1	17	34629533	34633126	+	2306	protein_coding	proline-rich transmembrane protein 1 [Source:MGI Symbol;Acc:MGI:1932118]	-	2485	2721	2885	2314	2348	2278	2283	2262	2085	2290	46.6229	51.4591	48.8647	44.2824	47.1872	44.4632	44.1887	44.4049	43.1326	44.282
ENSMUSG00000033361	1248.69	1329.13	1404.52	1300.37	1314.76	1137.97	1168.99	1242.97	1165.3	1197.36	0.158497	0.00136773	0.304811	Prrg3	X	71962624	71972722	+	6087	protein_coding	proline rich Gla (G-carboxyglutamic acid) 3 (transmembrane) [Source:MGI Symbol;Acc:MGI:2685214]	-	1299	1355	1598	1314	1264	1119	1162	1225	1079	1188	9.23291	9.70798	10.2537	9.5262	9.62341	8.27433	8.52055	9.11025	8.45624	8.7029
ENSMUSG00000047996	118.237	163.812	153.812	148.444	140.421	197.288	177.059	156.26	178.198	183.434	-0.299452	0.00916431	0.628017	Prrg1	X	78449613	78583896	-	11614	protein_coding	proline rich Gla (G-carboxyglutamic acid) 1 [Source:MGI Symbol;Acc:MGI:1917364]	-	123	167	175	150	135	194	176	154	165	182	0.458201	0.627087	0.588525	0.56995	0.538688	0.751841	0.676387	0.600256	0.677737	0.69878
ENSMUSG00000064125	880.527	662.113	826.189	704.616	803.002	665.084	654.918	755.931	669.591	690.396	0.174358	0.0314287	0.856052	Prr36	8	4209543	4217459	-	4891	protein_coding	proline rich 36 [Source:MGI Symbol;Acc:MGI:3605626]	-	916	675	940	712	772	654	651	745	620	685	8.10271	6.01865	7.50653	6.42406	7.31484	6.01847	5.94084	6.89534	6.04718	6.24516
ENSMUSG00000055945	1274.65	1253.6	1291.14	1355.79	1174.34	1637.29	1507.01	1413.44	1440.7	1341.48	-0.208864	0.000670897	0.223084	Prr18	17	8337459	8344113	+	3656	protein_coding	proline rich 18 [Source:MGI Symbol;Acc:MGI:2443403]	-	1326	1278	1469	1370	1129	1610	1498	1393	1334	1331	15.6917	15.2447	15.6937	16.5364	14.3111	19.821	18.2882	17.2481	17.4064	16.2339
ENSMUSG00000047040	7.69019	12.7518	25.4888	19.7926	24.9638	11.1864	8.04814	10.1467	4.31994	8.06301	1.11527	0.00788426	0.598481	Prr15l	11	96928104	96937830	+	3923	protein_coding	proline rich 15-like [Source:MGI Symbol;Acc:MGI:2387599]	-	8	13	29	20	24	11	8	10	4	8	0.0882275	0.144517	0.288728	0.224978	0.283516	0.126206	0.0910199	0.115393	0.0486408	0.0909332
ENSMUSG00000079045	57.6764	33.3509	31.6413	48.4918	33.2851	69.1525	75.4513	35.5135	57.2393	52.4096	-0.503981	0.0364827	0.885095	Prox1os	1	190170296	190217276	+	828	antisense	prospero homeobox 1, opposite strand [Source:MGI Symbol;Acc:MGI:4937200]	-	60	34	36	49	32	68	75	35	53	52	3.13511	1.79078	1.69817	2.61152	1.79104	3.69645	4.04292	1.91353	3.05355	2.80042
ENSMUSG00000036864	108.624	142.232	145.902	123.704	152.903	118.983	84.5055	121.761	113.399	115.906	0.280215	0.0433337	0.905032	Proser3	7	30539134	30552299	-	4717	protein_coding	proline and serine rich 3 [Source:MGI Symbol;Acc:MGI:2681861]	-	113	145	166	125	147	117	84	120	105	115	1.03644	1.34059	1.37452	1.16942	1.44423	1.11642	0.794837	1.15163	1.0619	1.08713
ENSMUSG00000045052	54.7926	42.1791	63.2826	52.4503	49.9276	27.4576	45.2708	49.7189	35.6395	39.3072	0.413775	0.0459909	0.916309	Prlhr	19	60466733	60468304	-	1572	protein_coding	prolactin releasing hormone receptor [Source:MGI Symbol;Acc:MGI:2135956]	-	57	43	72	53	48	27	45	49	33	39	1.56875	1.19291	1.78891	1.48782	1.41506	0.773067	1.27769	1.41105	1.00143	1.10627
ENSMUSG00000048960	614.254	671.922	669.741	613.57	601.211	627.457	578.46	580.393	557.273	505.954	0.154704	0.0266897	0.845499	Prex2	1	10993465	11303681	+	16609	protein_coding	phosphatidylinositol-3,4,5-trisphosphate-dependent Rac exchange factor 2 [Source:MGI Symbol;Acc:MGI:1923385]	-	639	685	762	620	578	617	575	572	516	502	1.66452	1.79862	1.79193	1.64731	1.61276	1.67204	1.54522	1.55901	1.48206	1.34775
ENSMUSG00000024127	8355.39	8619.24	9081.93	9152.09	9268.85	7521.35	8014.94	9159.45	8022.14	8556.87	0.10778	0.0489627	0.925979	Prepl	17	85063477	85090267	-	3830	protein_coding	prolyl endopeptidase-like [Source:MGI Symbol;Acc:MGI:2441932]	-	8692	8787	10333	9248	8911	7396	7967	9027	7428	8490	98.1869	100.054	105.375	106.556	107.823	86.9169	92.8455	106.695	92.5192	98.8461
ENSMUSG00000041577	643.092	605.221	704.019	533.41	568.966	637.627	475.846	403.84	442.794	457.576	0.337937	0.00264241	0.433331	Prelp	1	133910304	133921414	-	3615	protein_coding	proline arginine-rich end leucine-rich repeat [Source:MGI Symbol;Acc:MGI:2151110]	-	669	617	801	539	547	627	473	398	410	454	8.00664	7.44337	8.65432	6.57973	7.01236	7.80666	5.84006	4.98393	5.41046	5.60013
ENSMUSG00000045679	40.3735	42.1791	33.3991	32.6578	39.526	50.8474	49.2949	50.7336	39.9595	56.4411	-0.398056	0.042029	0.905032	Pqlc3	12	16988648	17000408	-	5408	protein_coding	PQ loop repeat containing [Source:MGI Symbol;Acc:MGI:2444067]	-	42	43	38	33	38	50	49	50	37	56	0.336005	0.346757	0.274445	0.26928	0.325636	0.41614	0.404412	0.418534	0.32638	0.461745
ENSMUSG00000015474	373.935	364.898	386.727	450.281	416.063	305.085	361.16	350.062	348.835	336.631	0.226472	0.00614527	0.529976	Ppt2	17	34616662	34628510	-	2614	protein_coding	palmitoyl-protein thioesterase 2 [Source:MGI Symbol;Acc:MGI:1860075]	-	389	372	440	455	400	300	359	345	323	334	6.43838	6.20626	6.5744	7.68128	7.09153	5.16561	6.1299	5.97463	5.89462	5.69759
ENSMUSG00000037166	475.83	390.402	366.512	378.038	257.959	610.169	485.907	425.148	481.674	465.639	-0.400825	0.0024251	0.421555	Ppp1r14a	7	29289308	29293801	+	1367	protein_coding	protein phosphatase 1, regulatory inhibitor subunit 14A [Source:MGI Symbol;Acc:MGI:1931139]	-	495	398	417	382	248	600	483	419	446	462	15.6664	12.6972	11.9145	12.3317	8.40753	19.7555	15.7704	13.8753	15.5641	15.0704
ENSMUSG00000024538	28.8382	12.7518	16.6996	20.7822	7.28111	32.5424	31.1866	23.3375	24.8397	27.2127	-0.683479	0.0312757	0.856052	Ppic	18	53406341	53418007	-	1286	protein_coding	peptidylprolyl isomerase C [Source:MGI Symbol;Acc:MGI:97751]	-	30	13	19	21	7	32	31	23	23	27	1.00928	0.440854	0.577061	0.720619	0.252257	1.11999	1.07593	0.809626	0.85319	0.93621
ENSMUSG00000048349	0.961274	4.90454	4.39462	2.96889	2.08032	357.966	41.2467	3.04402	3.23996	4.03151	-4.73937	0.000289704	0.173106	Pou4f1	14	104461676	104467999	-	4672	protein_coding	POU domain, class 4, transcription factor 1 [Source:MGI Symbol;Acc:MGI:102525]	Pou	1	5	5	3	2	352	41	3	3	4	0.0092604	0.0466724	0.0418	0.0283365	0.0198387	3.39114	0.391693	0.029068	0.0306321	0.0381775
ENSMUSG00000090125	161.494	125.556	133.597	130.631	134.18	240	187.119	184.67	159.838	141.103	-0.413319	0.00324522	0.447712	Pou3f1	4	124656807	124660655	+	3849	protein_coding	POU domain, class 3, transcription factor 1 [Source:MGI Symbol;Acc:MGI:101896]	Pou	168	128	152	132	129	236	186	182	148	140	1.8884	1.45029	1.54243	1.5134	1.5532	2.75975	2.1569	2.14053	1.83431	1.62193
ENSMUSG00000008496	498.901	563.042	529.992	517.576	586.649	374.237	406.431	541.835	424.435	478.741	0.276069	0.00360994	0.476313	Pou2f2	7	25087344	25179726	-	8243	protein_coding	POU domain, class 2, transcription factor 2 [Source:MGI Symbol;Acc:MGI:101897]	Pou	519	574	603	523	564	368	404	534	393	475	2.72405	3.03682	2.8572	2.79991	3.17088	2.00941	2.18756	2.9326	2.2744	2.56956
ENSMUSG00000029649	1324.64	1254.58	1180.4	1271.67	1239.87	1308.81	1380.26	1319.07	1395.34	1353.58	-0.107899	0.0239751	0.840242	Pomp	5	147860461	147876456	+	5216	protein_coding	proteasome maturation protein [Source:MGI Symbol;Acc:MGI:1913787]	-	1378	1279	1343	1285	1192	1287	1372	1300	1292	1343	11.4299	10.6936	10.0565	10.8716	10.5907	11.1057	11.7404	11.2824	11.8164	11.4812
ENSMUSG00000066235	1425.57	1383.08	1451.1	1324.12	1335.56	1203.05	1185.09	1325.16	1322.98	1328.38	0.121242	0.0234897	0.836726	Pomgnt2	9	121981606	121997110	-	2903	protein_coding	protein O-linked mannose beta 1,4-N-acetylglucosaminyltransferase 2 [Source:MGI Symbol;Acc:MGI:2143424]	-	1483	1410	1651	1338	1284	1183	1178	1306	1225	1318	22.1017	21.1819	22.2131	20.3393	20.4976	18.3419	18.1119	20.3654	20.1302	20.2451
ENSMUSG00000031783	677.698	787.67	735.66	787.745	766.596	773.898	814.874	817.826	820.789	878.868	-0.129397	0.0344794	0.869891	Polr2c	8	94857450	94873535	+	5256	protein_coding	polymerase (RNA) II (DNA directed) polypeptide C [Source:MGI Symbol;Acc:MGI:109299]	-	705	803	837	796	737	761	810	806	760	872	5.80318	6.66274	6.21984	6.68321	6.49827	6.51681	6.87851	6.94188	6.8979	7.39796
ENSMUSG00000005198	2579.1	2444.42	2359.03	2411.73	2229.06	2142.71	2239.4	2369.26	1899.7	2293.93	0.135406	0.029242	0.848908	Polr2a	11	69733997	69758637	-	7067	protein_coding	polymerase (RNA) II (DNA directed) polypeptide A [Source:MGI Symbol;Acc:MGI:98086]	-	2683	2492	2684	2437	2143	2107	2226	2335	1759	2276	16.4255	15.3782	14.8339	15.2177	14.0531	13.4195	14.059	14.9572	11.8738	14.3611
ENSMUSG00000028394	384.509	374.707	371.785	395.852	372.377	406.779	431.582	443.412	425.514	393.072	-0.145268	0.0358436	0.883787	Pole3	4	62522649	62525068	-	2040	protein_coding	polymerase (DNA directed), epsilon 3 (p17 subunit) [Source:MGI Symbol;Acc:MGI:1933378]	-	400	382	423	400	358	400	429	437	394	390	8.48325	8.16631	8.09877	8.65281	8.13276	8.82543	9.38624	9.69725	9.21351	8.52482
ENSMUSG00000025608	762.29	796.498	709.292	645.238	758.275	675.254	656.93	585.466	498.954	563.403	0.300365	0.000529459	0.214037	Podxl	6	31519488	31563981	-	5488	protein_coding	podocalyxin-like [Source:MGI Symbol;Acc:MGI:1351317]	-	793	812	807	652	729	664	653	577	462	559	6.25161	6.4526	5.74339	5.24277	6.156	5.44578	5.31085	4.75948	4.01594	4.54201
ENSMUSG00000036833	447.954	588.545	615.247	321.629	537.762	410.847	366.19	360.209	399.595	339.654	0.420981	0.00233818	0.410552	Pnpla7	2	24976033	25054057	+	7496	protein_coding	patatin-like phospholipase domain containing 7 [Source:MGI Symbol;Acc:MGI:2385325]	-	466	600	700	325	517	404	364	355	370	337	2.68961	3.49072	3.64735	1.91329	3.19629	2.42582	2.16739	2.14386	2.35468	2.00471
ENSMUSG00000043286	0	0	2.63677	0.989629	0	7.11864	2.01204	4.05869	2.15997	5.03938	-2.42858	0.0200256	1	Pnpla1	17	28858411	28890309	+	4837	protein_coding	patatin-like phospholipase domain containing 1 [Source:MGI Symbol;Acc:MGI:3617850]	-	0	0	3	1	0	7	2	4	2	5	0	0	0.0242245	0.00912329	0	0.065137	0.0184552	0.0374353	0.0197248	0.046094
ENSMUSG00000027952	885.333	812.192	798.943	778.838	729.151	850.169	1019.1	831.017	883.429	864.758	-0.15136	0.0331884	0.860175	Pmvk	3	89454541	89469013	+	1713	protein_coding	phosphomevalonate kinase [Source:MGI Symbol;Acc:MGI:1915853]	-	921	828	909	787	701	836	1013	819	818	858	23.2613	21.0798	20.726	20.2743	18.9647	21.9662	26.3947	21.6433	22.7801	22.3347
ENSMUSG00000018217	502.746	397.268	359.48	434.447	327.65	604.067	523.129	496.175	450.354	451.529	-0.320996	0.00489014	0.500032	Pmp22	11	63128982	63159547	+	2354	protein_coding	peripheral myelin protein 22 [Source:MGI Symbol;Acc:MGI:97631]	-	523	405	409	439	315	594	520	489	417	448	9.61231	7.50311	6.78619	8.22973	6.2014	11.3576	9.85965	9.40372	8.45062	8.48638
ENSMUSG00000029765	1683.19	1680.3	1849.26	1673.46	1731.86	1584.41	1639.81	1720.88	1448.26	1580.35	0.11214	0.0385672	0.891509	Plxna4	6	32144268	32588192	-	14103	protein_coding	plexin A4 [Source:MGI Symbol;Acc:MGI:2179061]	-	1751	1713	2104	1691	1665	1558	1630	1696	1341	1568	5.37164	5.29711	5.82697	5.29127	5.47127	4.97235	5.15871	5.44392	4.53603	4.95776
ENSMUSG00000030084	2823.26	2740.66	2932.97	3121.29	3172.48	2547.46	2423.5	2926.31	2404.05	2896.64	0.164141	0.0153398	0.742764	Plxna1	6	89316314	89362620	-	9054	protein_coding	plexin A1 [Source:MGI Symbol;Acc:MGI:107685]	-	2937	2794	3337	3154	3050	2505	2409	2884	2226	2874	14.0345	13.4579	14.3954	15.3727	15.6115	12.453	11.8757	14.4196	11.7285	14.1546
ENSMUSG00000017754	1110.27	1000.53	863.983	1202.4	1043.28	1533.56	1255.51	1167.89	1192.3	1270.93	-0.299021	0.00101013	0.252286	Pltp	2	164839518	164857711	-	2562	protein_coding	phospholipid transfer protein [Source:MGI Symbol;Acc:MGI:103151]	-	1155	1020	983	1215	1003	1508	1248	1151	1104	1261	19.5045	17.3626	14.9859	20.9279	18.1429	26.4928	21.742	20.3373	20.5565	21.9476
ENSMUSG00000095654	1.92255	2.94273	0.878925	4.94814	1.04016	7.11864	9.05416	10.1467	2.15997	3.02363	-1.43714	0.0435336	1	Plscr5	9	92192936	92209772	+	1191	protein_coding	phospholipid scramblase family, member 5 [Source:MGI Symbol;Acc:MGI:3779462]	-	2	3	1	5	1	7	9	10	2	3	0.0726525	0.109851	0.0327942	0.185262	0.0389111	0.264541	0.337284	0.380089	0.0801082	0.112321
ENSMUSG00000027562	2631.97	2676.9	2301.9	2858.05	2287.31	3438.3	3367.14	3080.54	3313.4	2962.15	-0.341429	5.9809e-07	0.00346553	Car2	3	14886273	14900770	+	2422	protein_coding	carbonic anhydrase 2 [Source:MGI Symbol;Acc:MGI:88269]	-	2738	2729	2619	2888	2199	3381	3347	3036	3068	2939	48.9093	49.1385	42.2348	52.62	42.0762	62.8314	61.6803	56.7447	60.4283	54.1098
ENSMUSG00000031775	232.628	197.163	174.906	203.864	152.903	262.373	246.474	215.111	224.637	225.764	-0.288231	0.0119703	0.684472	Pllp	8	94674894	94696278	-	2083	protein_coding	plasma membrane proteolipid [Source:MGI Symbol;Acc:MGI:1915051]	-	242	201	199	206	147	258	245	212	208	224	5.02642	4.20823	3.73141	4.36421	3.27049	5.57489	5.24978	4.60727	4.76357	4.79523
ENSMUSG00000030701	7152.84	7266.57	7114.9	7042.2	6743.34	8827.11	8041.1	7460.88	7837.46	7255.7	-0.158483	0.00256612	0.431873	Plekhb1	7	100642892	100662414	-	3713	protein_coding	pleckstrin homology domain containing, family B (evectins) member 1 [Source:MGI Symbol;Acc:MGI:1351469]	-	7441	7408	8095	7116	6483	8680	7993	7353	7257	7199	86.704	87.0099	85.1532	84.5743	80.9164	105.221	96.0837	89.6473	93.2376	86.4565
ENSMUSG00000029598	1958.11	1969.66	1922.21	1918.89	1893.09	1751.19	1745.44	1825.4	1777.66	1928.07	0.0979277	0.0218	0.819599	Plbd2	5	120483282	120503625	-	6620	protein_coding	phospholipase B domain containing 2 [Source:MGI Symbol;Acc:MGI:1919022]	-	2037	2008	2187	1939	1820	1722	1735	1799	1646	1913	13.3127	13.2281	12.9033	12.9255	12.7409	11.708	11.6979	12.3019	11.8613	12.8857
ENSMUSG00000031538	789.206	713.121	758.512	677.896	693.785	749.491	567.394	618.95	631.792	678.301	0.162828	0.0367086	0.885095	Plat	8	22757727	22782844	+	6241	protein_coding	plasminogen activator, tissue [Source:MGI Symbol;Acc:MGI:97610]	-	821	727	863	685	667	737	564	610	585	673	5.69143	5.08011	5.40089	4.84355	4.95287	5.3152	4.03357	4.42459	4.47158	4.80852
ENSMUSG00000019817	1210.24	994.641	1237.53	1154.9	1080.72	882.711	1014.07	995.393	1109.15	1016.95	0.178999	0.0152748	0.742764	Plagl1	10	13060504	13131694	+	7819	protein_coding	pleiomorphic adenoma gene-like 1 [Source:MGI Symbol;Acc:MGI:1100874]	zf-C2H2	1259	1014	1408	1167	1039	868	1008	981	1027	1009	6.96638	5.65561	7.03332	6.58639	6.15814	4.9966	5.75405	5.67957	6.26582	5.75428
ENSMUSG00000108293	3.84509	3.92363	1.75785	0.989629	7.28111	0	2.01204	1.01467	0	0	2.53036	0.0291062	1	Pla2g4c-ps	7	13361111	13386695	+	1364	unprocessed_pseudogene	phospholipase A2, group IVC (cytosolic, calcium-independent), pseudogene [Source:MGI Symbol;Acc:MGI:5645818]	-	4	4	2	1	7	0	2	1	0	0	0.126876	0.127891	0.0572696	0.0323529	0.237831	0	0.0654456	0.0331881	0	0
ENSMUSG00000060675	787.283	782.765	678.53	802.589	768.677	904.067	909.44	828.987	824.029	887.939	-0.190217	0.00223858	0.401168	Pla2g16	19	7557459	7588545	+	6396	protein_coding	phospholipase A2, group XVI [Source:MGI Symbol;Acc:MGI:2179715]	-	819	798	772	811	739	889	904	817	763	881	5.53998	5.44111	4.71431	5.59551	5.35453	6.25604	6.30848	5.78244	5.69082	6.14212
ENSMUSG00000026785	40.3735	58.8545	65.9194	64.3259	55.1284	30.5085	51.3069	33.4842	34.5596	37.2914	0.604835	0.0041859	0.486127	Pkn3	2	30077684	30091022	+	4255	protein_coding	protein kinase N3 [Source:MGI Symbol;Acc:MGI:2388285]	-	42	60	75	65	53	30	51	33	32	37	0.427053	0.614957	0.688447	0.674126	0.577247	0.317342	0.534977	0.351085	0.358764	0.387751
ENSMUSG00000037578	71.1343	102.015	60.6458	67.2948	82.1725	98.644	106.638	84.2178	99.3587	113.89	-0.394783	0.0146332	0.722636	Pkd2l1	19	44147637	44192442	-	3530	protein_coding	polycystic kidney disease 2-like 1 [Source:MGI Symbol;Acc:MGI:1352448]	-	74	104	69	68	79	97	106	83	92	113	0.906963	1.28485	0.763455	0.850084	1.03714	1.23681	1.34028	1.06439	1.24329	1.42743
ENSMUSG00000023795	86.5146	94.1672	88.7714	76.2014	94.6544	67.1186	65.3912	70.0124	83.1589	68.5356	0.315289	0.0315292	0.856052	Pisd-ps2	17	3076578	3084183	-	2108	transcribed_unprocessed_pseudogene	phosphatidylserine decarboxylase, pseudogene 2 [Source:MGI Symbol;Acc:MGI:3612472]	-	90	96	101	77	91	66	65	69	77	68	1.84716	1.98607	1.87137	1.61194	2.00058	1.40922	1.37628	1.48175	1.74253	1.43843
ENSMUSG00000023452	450.837	455.142	419.247	433.457	437.906	457.627	474.84	481.969	474.114	534.175	-0.142054	0.0368085	0.885095	Pisd	5	32736301	32785646	-	5750	protein_coding	phosphatidylserine decarboxylase [Source:MGI Symbol;Acc:MGI:2445114]	-	469	464	477	438	421	450	472	475	439	530	3.52889	3.51919	3.24011	3.36151	3.39312	3.5225	3.66386	3.73958	3.64213	4.11016
ENSMUSG00000041958	1513.04	1461.55	1406.28	1459.7	1437.5	1361.69	1239.41	1352.56	1433.14	1371.72	0.107033	0.0303984	0.856052	Pigs	11	78328415	78342782	+	2501	protein_coding	phosphatidylinositol glycan anchor biosynthesis, class S [Source:MGI Symbol;Acc:MGI:2687325]	-	1574	1490	1600	1475	1382	1339	1232	1333	1327	1361	27.2285	25.9816	24.9871	26.0259	25.6082	24.0975	21.9868	24.1276	25.3114	24.2658
ENSMUSG00000014444	130.733	137.327	120.413	109.849	118.578	124.068	116.698	92.3352	76.679	86.6774	0.311969	0.0338012	0.862018	Piezo1	8	122481698	122551329	-	9935	protein_coding	piezo-type mechanosensitive ion channel component 1 [Source:MGI Symbol;Acc:MGI:3603204]	-	136	140	137	111	114	122	116	91	71	86	0.592248	0.614544	0.538594	0.493041	0.531768	0.552711	0.52114	0.41464	0.340918	0.385995
ENSMUSG00000004934	519.088	447.294	449.131	438.406	438.947	516.61	492.949	487.043	556.193	501.923	-0.155125	0.0316276	0.856052	Pias4	10	81153266	81167923	-	3695	protein_coding	protein inhibitor of activated STAT 4 [Source:MGI Symbol;Acc:MGI:2136940]	zf-MIZ	540	456	511	443	422	508	490	480	515	498	6.32283	5.38199	5.40151	5.29075	5.29277	6.18807	5.91897	5.88063	6.64893	6.00988
ENSMUSG00000079484	112.469	154.003	166.996	107.87	148.743	102.712	87.5235	80.1591	90.7188	112.882	0.54278	0.000466362	0.211201	Phyhd1	2	30266203	30282149	+	2657	protein_coding	phytanoyl-CoA dioxygenase domain containing 1 [Source:MGI Symbol;Acc:MGI:3612860]	-	117	157	190	109	143	101	87	79	84	112	1.90514	2.57692	2.793	1.81035	2.49419	1.71094	1.46148	1.34596	1.50816	1.87965
ENSMUSG00000048537	4130.59	4264.99	3725.76	4145.55	3879.79	5045.08	4724.26	4639.08	4198.99	4378.22	-0.190374	0.000793202	0.233452	Phldb1	9	44686304	44735198	-	7179	protein_coding	pleckstrin homology like domain, family B, member 1 [Source:MGI Symbol;Acc:MGI:2143230]	-	4297	4348	4239	4189	3730	4961	4696	4572	3888	4344	25.8961	26.413	23.0626	25.7498	24.0785	31.1036	29.1964	28.8297	25.8358	26.9821
ENSMUSG00000025537	431.612	408.058	430.673	453.25	430.625	522.712	448.684	489.072	502.194	501.923	-0.194015	0.00428601	0.486127	Phkg1	5	129863421	129898549	-	6509	protein_coding	phosphorylase kinase gamma 1 [Source:MGI Symbol;Acc:MGI:97579]	-	449	416	490	458	414	514	446	482	465	498	2.98445	2.78722	2.94029	3.10512	2.94762	3.55431	3.05834	3.3522	3.40798	3.41166
ENSMUSG00000053398	1313.1	1135.89	1313.11	1355.79	1386.53	1438.98	1359.13	1409.38	1450.42	1445.3	-0.127135	0.0264214	0.845499	Phgdh	3	98313170	98339990	-	2486	protein_coding	3-phosphoglycerate dehydrogenase [Source:MGI Symbol;Acc:MGI:1355330]	-	1366	1158	1494	1370	1333	1415	1351	1389	1343	1434	23.7729	20.3142	23.4724	24.3191	24.8493	25.6189	24.256	25.2929	25.7712	25.7216
ENSMUSG00000025791	1936.01	1808.8	1829.92	1877.33	1998.14	1674.91	1707.21	1765.53	1932.1	1731.53	0.101028	0.0486802	0.924604	Pgm2	4	99929414	99987294	+	2921	protein_coding	phosphoglucomutase 2 [Source:MGI Symbol;Acc:MGI:97565]	-	2014	1844	2082	1897	1921	1647	1697	1740	1789	1718	29.8305	27.531	27.8393	28.6592	30.4776	25.3786	25.9307	26.9659	29.2171	26.2266
ENSMUSG00000030413	104.779	175.583	182.816	109.849	149.783	74.2372	125.752	94.3645	75.599	92.7247	0.643617	0.000633544	0.223084	Pglyrp1	7	18871331	18890459	+	1837	protein_coding	peptidoglycan recognition protein 1 [Source:MGI Symbol;Acc:MGI:1345092]	-	109	179	208	111	144	73	125	93	70	92	2.56714	4.24949	4.42245	2.6665	3.63278	1.78863	3.03714	2.29177	1.81781	2.23321
ENSMUSG00000024309	728.645	712.14	699.624	738.263	750.994	817.627	856.121	795.503	880.189	787.152	-0.188833	0.00070584	0.223084	Pfdn6	17	33938821	33940343	-	1193	protein_coding	prefoldin subunit 6 [Source:MGI Symbol;Acc:MGI:95908]	-	758	726	796	746	722	804	851	784	815	781	27.4891	26.5393	26.0604	27.5947	28.0467	30.3334	31.8386	29.749	32.5894	29.1918
ENSMUSG00000006412	1391.92	1272.24	1269.17	1167.76	1395.89	1422.71	1345.05	1420.54	1583.26	1454.37	-0.153335	0.0142829	0.718669	Pfdn2	1	171345670	171359254	+	1937	protein_coding	prefoldin 2 [Source:MGI Symbol;Acc:MGI:1276111]	-	1448	1297	1444	1180	1342	1399	1337	1400	1466	1443	32.3423	29.2014	29.117	26.8831	32.1076	32.5083	30.8082	32.7187	36.1047	33.2191
ENSMUSG00000027674	1247.73	1694.03	1324.54	1355.79	1254.43	1755.25	1826.93	1462.14	1521.7	1378.78	-0.208387	0.0272285	0.845499	Pex5l	3	32949408	33143247	-	8846	protein_coding	peroxisomal biogenesis factor 5-like [Source:MGI Symbol;Acc:MGI:1916672]	-	1298	1727	1507	1370	1206	1726	1816	1441	1409	1368	6.34834	8.51409	6.65388	6.83441	6.31809	8.78213	9.16291	7.37419	7.59841	6.89588
ENSMUSG00000028957	852.65	816.116	849.92	1033.17	838.367	945.762	1012.05	989.305	914.748	1078.43	-0.170709	0.0192725	0.799554	Per3	4	151003652	151044665	-	9608	protein_coding	period circadian clock 3 [Source:MGI Symbol;Acc:MGI:1277134]	-	887	832	967	1044	806	930	1006	975	847	1070	3.99414	3.77645	3.93099	4.79507	3.88765	4.35668	4.67336	4.59377	4.20542	4.96594
ENSMUSG00000063931	568.113	589.526	598.548	576.954	576.247	618.305	653.912	652.434	650.152	669.23	-0.156697	0.00563965	0.521458	Pepd	7	34912379	35044708	+	3082	protein_coding	peptidase D [Source:MGI Symbol;Acc:MGI:97542]	-	591	601	681	583	554	608	650	643	602	664	8.29636	8.50422	8.63025	8.34764	8.33034	8.87926	9.41338	9.44443	9.318	9.60696
ENSMUSG00000092035	7851.68	6908.54	9802.65	8623.63	10660.6	5916.61	5797.68	7944.88	7076.07	7597.37	0.352901	0.0136369	0.70848	Peg10	6	4747306	4760517	+	6667	protein_coding	paternally expressed 10 [Source:MGI Symbol;Acc:MGI:2157785]	-	8168	7043	11153	8714	10249	5818	5763	7830	6552	7538	53.0051	46.0702	65.3386	57.6786	71.242	39.278	38.5818	53.1654	46.8816	50.4169
ENSMUSG00000032788	3199.12	2926.05	3323.21	3111.39	3352.43	2776.27	2803.77	3103.88	2663.25	3076.04	0.141644	0.0118032	0.683484	Pdxk	10	78436744	78464975	-	5397	protein_coding	pyridoxal (pyridoxine, vitamin B6) kinase [Source:MGI Symbol;Acc:MGI:1351869]	-	3328	2983	3781	3144	3223	2730	2787	3059	2466	3052	26.6786	24.1043	27.363	25.7074	27.6754	22.7675	23.0488	25.6581	21.7971	25.2164
ENSMUSG00000020388	204.751	187.354	174.027	168.237	162.265	257.288	187.119	194.817	206.277	224.757	-0.254882	0.0236563	0.837682	Pdlim4	11	54054928	54069014	-	2560	protein_coding	PDZ and LIM domain 4 [Source:MGI Symbol;Acc:MGI:1353470]	-	213	191	198	170	156	253	186	192	191	223	3.59975	3.25377	3.02088	2.93046	2.82403	4.44822	3.24293	3.39515	3.5592	3.88433
ENSMUSG00000022090	198.022	168.716	135.354	190.009	143.542	262.373	213.276	177.568	220.317	183.434	-0.339406	0.0130874	0.708276	Pdlim2	14	70164218	70177681	-	4486	protein_coding	PDZ and LIM domain 2 [Source:MGI Symbol;Acc:MGI:2384850]	-	206	172	154	192	138	258	212	175	204	182	1.98674	1.6721	1.34082	1.88873	1.42562	2.58861	2.10931	1.76594	2.16935	1.8091
ENSMUSG00000021684	1010.3	874.971	1018.67	1054.94	960.066	732.203	803.808	964.953	939.588	896.002	0.182226	0.022906	0.833379	Pde8b	13	95024454	95250336	-	5879	protein_coding	phosphodiesterase 8B [Source:MGI Symbol;Acc:MGI:2443999]	-	1051	892	1159	1066	923	720	799	951	870	889	7.73449	6.6169	7.69997	8.00168	7.27585	5.51233	6.06608	7.32275	7.05951	6.74294
ENSMUSG00000021587	1115.08	1045.65	1264.77	1132.14	1309.56	932.542	838.013	1063.38	1118.87	1073.39	0.223485	0.00893983	0.628017	Pcsk1	13	75089826	75134861	+	5604	protein_coding	proprotein convertase subtilisin/kexin type 1 [Source:MGI Symbol;Acc:MGI:97511]	-	1160	1066	1439	1144	1259	917	833	1048	1036	1065	8.95555	8.29568	10.0293	9.00856	10.4115	7.36507	6.63455	8.46565	8.81902	8.47427
ENSMUSG00000023036	745.948	688.598	738.297	658.103	706.267	509.491	608.641	742.74	548.633	666.207	0.201589	0.0277383	0.845499	Pcdhgc4	18	37815079	37841873	+	5596	protein_coding	protocadherin gamma subfamily C, 4 [Source:MGI Symbol;Acc:MGI:1935203]	-	776	702	840	665	679	501	605	732	508	661	5.99952	5.47082	5.86287	5.24411	5.62312	4.02964	4.8255	5.92149	4.33057	5.26713
ENSMUSG00000103037	102.856	98.0909	98.4396	94.0147	111.297	95.5932	64.3851	80.1591	65.8791	79.6223	0.386244	0.00828344	0.610131	Pcdhgb1	18	37680233	37841870	+	5776	protein_coding	protocadherin gamma subfamily B, 1 [Source:MGI Symbol;Acc:MGI:1935169]	-	107	100	112	95	107	94	64	79	61	79	0.801473	0.755033	0.757355	0.725812	0.858503	0.732498	0.494558	0.619152	0.503804	0.609889
ENSMUSG00000103472	272.04	246.208	254.009	248.397	280.843	233.898	189.131	228.301	201.957	228.788	0.265312	0.0044475	0.486127	Pcdhga7	18	37714764	37841873	+	5217	protein_coding	protocadherin gamma subfamily A, 7 [Source:MGI Symbol;Acc:MGI:1935219]	-	283	251	289	251	270	230	188	225	187	227	2.34692	2.09819	2.16364	2.12315	2.39844	1.98433	1.60843	1.95236	1.70994	1.94024
ENSMUSG00000029108	1366.93	1263.41	1445.83	1440.9	1417.74	1181.69	1333.98	1281.53	1320.82	1188.29	0.137353	0.0163802	0.768569	Pcdh7	5	57717967	58133230	+	10604	protein_coding	protocadherin 7 [Source:MGI Symbol;Acc:MGI:1860487]	-	1422	1288	1645	1456	1363	1162	1326	1263	1223	1179	5.8018	5.29711	6.05906	6.05925	5.95678	4.93222	5.58134	5.39177	5.50194	4.95787
ENSMUSG00000035566	3127.98	3164.41	3565.8	3402.34	3818.42	2798.64	2999.94	3222.6	3007.76	3041.77	0.180386	0.0029204	0.447299	Pcdh17	14	84443563	84539002	+	12991	protein_coding	protocadherin 17 [Source:MGI Symbol;Acc:MGI:2684924]	-	3254	3226	4057	3438	3671	2752	2982	3176	2785	3018	10.837	10.8297	12.1975	11.6786	13.0957	9.5348	10.2454	11.0671	10.2268	10.3592
ENSMUSG00000034981	1792.78	1581.22	2002.19	1862.48	1919.09	1516.27	1484.88	1677.25	1778.74	1718.43	0.164011	0.0209698	0.819153	Parm1	5	91517615	91626894	+	5068	protein_coding	prostate androgen-regulated mucin-like protein 1 [Source:MGI Symbol;Acc:MGI:2443349]	-	1865	1612	2278	1882	1845	1491	1476	1653	1647	1705	15.9212	13.8714	17.556	16.3874	16.8712	13.2418	12.9991	14.765	15.503	15.0016
ENSMUSG00000028964	1796.62	1648.91	1678.75	1587.36	1654.89	1736.95	1807.81	1790.9	1825.18	1763.78	-0.0928665	0.038794	0.89437	Park7	4	150897133	150914437	-	2479	protein_coding	Parkinson disease (autosomal recessive, early onset) 7 [Source:MGI Symbol;Acc:MGI:2135637]	-	1869	1681	1910	1604	1591	1708	1797	1765	1690	1750	32.6186	29.5722	30.093	28.5532	29.7426	31.0111	32.3546	32.2304	32.5214	31.4784
ENSMUSG00000041423	640.208	436.504	483.409	515.597	447.268	559.322	484.901	564.158	632.872	720.632	-0.230988	0.0465215	0.916309	Paqr6	3	88364584	88368541	+	2429	protein_coding	progestin and adipoQ receptor family member VI [Source:MGI Symbol;Acc:MGI:1916207]	-	666	445	550	521	430	550	482	556	586	715	11.8626	7.98961	8.8439	9.46537	8.20401	10.1916	8.85695	10.362	11.5088	13.1259
ENSMUSG00000028032	1365.01	1272.24	1301.69	1315.22	1220.11	1340.34	1341.02	1455.04	1406.14	1390.87	-0.0983893	0.0422495	0.905032	Papss1	3	131564768	131643671	+	3053	protein_coding	3'-phosphoadenosine 5'-phosphosulfate synthase 1 [Source:MGI Symbol;Acc:MGI:1330587]	-	1420	1297	1481	1329	1173	1318	1333	1434	1302	1380	20.1231	18.527	18.9469	19.2099	17.8056	19.431	19.488	21.2628	20.3443	20.1559
ENSMUSG00000020273	314.337	303.101	390.243	359.235	327.65	314.237	274.643	284.108	271.076	272.127	0.26011	0.00423448	0.486127	Papolg	11	23862646	23895253	-	5491	protein_coding	poly(A) polymerase gamma [Source:MGI Symbol;Acc:MGI:2442119]	-	327	309	444	363	315	309	273	280	251	270	2.57649	2.45414	3.15821	2.91731	2.65855	2.53287	2.21909	2.30836	2.18063	2.19262
ENSMUSG00000037366	208.596	169.697	200.395	168.237	177.867	141.356	150.903	141.039	157.678	183.434	0.257511	0.0238999	0.839298	Pafah2	4	134396320	134427413	+	3616	protein_coding	platelet-activating factor acetylhydrolase 2 [Source:MGI Symbol;Acc:MGI:2140321]	-	217	173	228	170	171	139	150	139	146	182	2.59635	2.08646	2.46272	2.07467	2.19156	1.73018	1.85152	1.74014	1.92612	2.24437
ENSMUSG00000028927	397.967	399.23	384.969	468.094	421.264	676.271	435.606	433.265	460.074	468.663	-0.256603	0.0267482	0.845499	Padi2	4	140906344	140952586	+	5013	protein_coding	peptidyl arginine deiminase, type II [Source:MGI Symbol;Acc:MGI:1338892]	-	414	407	438	473	405	665	433	427	426	465	3.57302	3.5407	3.4126	4.16381	3.74406	5.97076	3.85527	3.85592	4.05388	4.13624
ENSMUSG00000027257	542.158	505.168	465.83	495.804	418.143	591.864	570.412	507.336	573.473	533.167	-0.193264	0.0135648	0.70848	Pacsin3	2	91255954	91264679	+	4327	protein_coding	protein kinase C and casein kinase substrate in neurons 3 [Source:MGI Symbol;Acc:MGI:1891410]	-	564	515	530	501	402	582	567	500	531	529	5.63929	5.19055	4.78407	5.1095	4.30551	6.05399	5.84872	5.23095	5.85419	5.45154
ENSMUSG00000024855	1814.88	1632.23	1767.52	1667.52	1808.83	1649.49	1588.5	1712.77	1506.58	1637.8	0.102253	0.0460165	0.916309	Pacs1	19	5133688	5273119	-	4339	protein_coding	phosphofurin acidic cluster sorting protein 1 [Source:MGI Symbol;Acc:MGI:1277113]	-	1888	1664	2011	1685	1739	1622	1579	1688	1395	1625	18.8254	16.7246	18.1022	17.1371	18.5736	16.8255	16.2427	17.6108	15.3371	16.6999
ENSMUSG00000019916	808.431	993.66	912.324	965.878	1043.28	679.322	729.363	862.471	890.988	941.357	0.20282	0.030131	0.856052	P4ha1	10	59323296	59373304	+	4114	protein_coding	procollagen-proline, 2-oxoglutarate 4-dioxygenase (proline 4-hydroxylase), alpha 1 polypeptide [Source:MGI Symbol;Acc:MGI:97463]	-	841	1013	1038	976	1003	668	725	850	825	934	8.84432	10.7384	9.85467	10.4692	11.2985	7.30833	7.86572	9.35302	9.5664	10.1236
ENSMUSG00000024922	0	0	0	0	0	7.11864	3.01805	3.04402	2.15997	0	-4.10644	0.0035522	1	Ovol1	19	5549137	5560575	-	2900	protein_coding	ovo like zinc finger 1 [Source:MGI Symbol;Acc:MGI:1330290]	zf-C2H2	0	0	0	0	0	7	3	3	2	0	0	0	0	0	0	0.108644	0.046173	0.0468296	0.0328996	0
ENSMUSG00000021848	62.4828	83.3772	62.4037	67.2948	70.7307	154.576	87.5235	67.983	75.599	80.6301	-0.430858	0.042194	0.905032	Otx2	14	48657677	48673819	-	4221	protein_coding	orthodenticle homeobox 2 [Source:MGI Symbol;Acc:MGI:97451]	TF_Otx	65	85	71	68	68	152	87	67	70	80	0.66624	0.878206	0.65698	0.710921	0.746584	1.62082	0.919959	0.71855	0.791119	0.845133
ENSMUSG00000034990	11.5353	49.0454	55.3723	12.8652	34.3252	11.1864	14.0842	11.1614	15.1198	6.04726	1.5067	0.000649743	0.223084	Otoa	7	121081650	121163097	+	8439	protein_coding	otoancorin [Source:MGI Symbol;Acc:MGI:2149209]	-	12	50	63	13	33	11	14	11	14	6	0.0615209	0.258388	0.29158	0.0679798	0.181221	0.0586689	0.074046	0.0590064	0.07914	0.0317038
ENSMUSG00000031394	9.61274	14.7136	5.27355	5.93777	3.12047	2.0339	2.01204	5.07336	1.07999	2.01575	1.6572	0.0135097	1	Opn1mw	X	74127464	74150760	+	1562	protein_coding	opsin 1 (cone pigments), medium-wave-sensitive (color blindness, deutan) [Source:MGI Symbol;Acc:MGI:1097692]	-	10	15	6	6	3	2	2	5	1	2	0.276982	0.418797	0.15003	0.169511	0.0890073	0.0576308	0.0571497	0.144906	0.0305406	0.0570952
ENSMUSG00000050121	538.313	387.459	337.507	420.592	338.051	636.61	616.689	545.894	452.514	397.103	-0.389849	0.00617744	0.529976	Opalin	19	41062474	41077113	-	1838	protein_coding	oligodendrocytic myelin paranodal and inner loop protein [Source:MGI Symbol;Acc:MGI:2657025]	-	560	395	384	425	325	626	613	538	419	394	13.1818	9.37226	8.16008	10.204	8.19451	15.3297	14.8861	13.2506	10.875	9.55876
ENSMUSG00000045518	126.888	97.11	121.292	112.818	105.056	72.2033	77.4634	113.643	63.7192	110.866	0.362373	0.0329668	0.860175	Onecut3	10	80494835	80517276	+	4776	protein_coding	one cut domain, family member 3 [Source:MGI Symbol;Acc:MGI:1891409]	CUT	132	99	138	114	101	71	77	112	59	110	1.19575	0.90399	1.12856	1.05334	0.980037	0.669114	0.7196	1.06158	0.589314	1.02702
ENSMUSG00000021913	2857.87	3227.19	3307.39	2766.01	3093.43	2840.34	2775.6	2842.1	2807.96	2896.64	0.10709	0.0440608	0.910488	Ogdhl	14	32322019	32348151	+	4148	protein_coding	oxoglutarate dehydrogenase-like [Source:MGI Symbol;Acc:MGI:3616088]	-	2973	3290	3763	2795	2974	2793	2759	2801	2600	2874	31.0091	34.59	35.4327	29.7352	33.2267	30.3067	29.6878	30.5683	29.9015	30.8957
ENSMUSG00000020456	5310.08	5572.54	5332.44	5186.64	5299.6	5059.32	5085.42	5191.06	5115.89	5106.91	0.0631241	0.0470649	0.916309	Ogdh	11	6291633	6356642	+	5456	protein_coding	oxoglutarate (alpha-ketoglutarate) dehydrogenase (lipoamide) [Source:MGI Symbol;Acc:MGI:1098267]	-	5524	5681	6067	5241	5095	4975	5055	5116	4737	5067	43.8038	45.4091	43.4319	42.3904	43.2768	41.0416	41.3534	42.4476	41.4179	41.4121
ENSMUSG00000032921	39.4122	17.6564	24.6099	26.72	21.8433	31.5254	45.2708	41.6016	37.7995	37.2914	-0.569565	0.021812	0.819599	Odf4	11	68921835	68927081	-	1166	protein_coding	outer dense fiber of sperm tails 4 [Source:MGI Symbol;Acc:MGI:2182079]	-	41	18	28	27	21	31	45	41	35	37	1.52131	0.673235	0.937925	1.02186	0.834653	1.19666	1.72258	1.59178	1.43195	1.41499
ENSMUSG00000047394	103.818	88.2818	103.713	92.0355	112.337	130.169	125.752	129.878	99.3587	117.922	-0.271477	0.0378676	0.887644	Odf3b	15	89377449	89379282	-	1768	protein_coding	outer dense fiber of sperm tails 3B [Source:MGI Symbol;Acc:MGI:1917363]	-	108	90	118	93	108	128	125	128	92	117	2.64286	2.22	2.60681	2.32128	2.83092	3.25862	3.15568	3.27737	2.48236	2.9509
ENSMUSG00000026211	803.625	874.971	801.579	796.651	874.773	795.254	664.978	797.532	743.03	755.908	0.14373	0.0254315	0.845499	Obsl1	1	75479310	75506452	-	8467	protein_coding	obscurin-like 1 [Source:MGI Symbol;Acc:MGI:2138628]	-	836	892	912	805	841	782	661	786	688	750	4.27178	4.59439	4.20702	4.1956	4.60311	4.15703	3.48447	4.20233	3.8763	3.94987
ENSMUSG00000046610	34.6059	15.6945	17.5785	24.7407	27.0441	30.5085	22.1324	22.3228	39.9595	92.7247	-0.797212	0.0372339	0.887644	Oacyl	18	65698268	65751601	+	3591	protein_coding	O-acyltransferase like [Source:MGI Symbol;Acc:MGI:2442915]	-	36	16	20	25	26	30	22	22	37	92	0.43373	0.194311	0.217532	0.307222	0.335539	0.376021	0.273446	0.277335	0.491525	1.14241
ENSMUSG00000048148	1636.09	1991.24	1792.13	1638.83	1862.92	1708.47	1654.9	1635.65	1418.02	1687.19	0.138209	0.0434966	0.90551	Nwd1	8	72646711	72717876	+	12067	protein_coding	NACHT and WD repeat domain containing 1 [Source:MGI Symbol;Acc:MGI:2442268]	-	1702	2030	2039	1656	1791	1680	1645	1612	1313	1674	6.10229	7.33651	6.59974	6.05604	6.87831	6.26637	6.08459	6.04732	5.19068	6.18596
ENSMUSG00000020029	2557.95	2723	2443.41	2325.63	2314.35	2935.93	2780.63	2481.89	2782.04	2501.55	-0.124703	0.0452833	0.915163	Nudt4	10	95547007	95564146	-	3210	protein_coding	nudix (nucleoside diphosphate linked moiety X)-type motif 4 [Source:MGI Symbol;Acc:MGI:1918457]	-	2661	2776	2780	2350	2225	2887	2764	2446	2576	2482	35.8651	37.7144	33.8258	32.3065	32.1226	40.4807	38.4324	34.4944	38.2825	34.4784
ENSMUSG00000073293	659.434	596.392	695.23	678.885	706.267	571.525	556.328	602.715	691.191	584.568	0.150996	0.0405818	0.903243	Nudt10	X	6168696	6173015	-	1775	protein_coding	nudix (nucleoside diphosphate linked moiety X)-type motif 10 [Source:MGI Symbol;Acc:MGI:2147931]	-	686	608	791	686	679	562	553	594	640	580	16.7208	14.9382	17.4055	17.0551	17.7279	14.251	13.9057	15.1491	17.2005	14.5707
ENSMUSG00000035142	79.7857	64.74	82.6189	92.0355	70.7307	110.847	111.668	76.1004	105.839	98.7719	-0.36647	0.0174054	0.774253	Nubpl	12	52097737	52312744	+	4954	protein_coding	nucleotide binding protein-like [Source:MGI Symbol;Acc:MGI:1924076]	-	83	66	94	93	68	109	111	75	98	98	0.724861	0.581006	0.741107	0.828428	0.636119	0.990322	1.00007	0.685335	0.943689	0.882106
ENSMUSG00000055254	15734.1	16685.3	16702.2	15777.7	16283.7	14164.1	15290.5	15495.1	14697.5	15495.1	0.111556	0.00313457	0.447712	Ntrk2	13	58806569	59133970	+	19292	protein_coding	neurotrophic tyrosine kinase, receptor, type 2 [Source:MGI Symbol;Acc:MGI:97384]	-	16368	17010	19003	15943	15655	13928	15199	15271	13609	15374	36.7072	38.4521	38.4728	36.4687	37.6063	32.4951	35.1643	35.8334	33.6518	35.5353
ENSMUSG00000035513	245.125	261.903	241.704	211.781	223.634	351.864	287.721	255.697	230.037	267.087	-0.233915	0.0390738	0.894688	Ntng2	2	29194541	29253005	-	3990	protein_coding	netrin G2 [Source:MGI Symbol;Acc:MGI:2159341]	-	255	267	275	214	215	346	286	252	213	265	2.76503	2.91831	2.69196	2.36684	2.49719	3.90309	3.19932	2.85907	2.54663	2.96158
ENSMUSG00000031349	395.083	419.829	388.485	441.374	377.577	461.695	440.636	438.338	489.234	428.348	-0.158741	0.0287945	0.845499	Nsdhl	X	72918557	72958514	+	2853	protein_coding	NAD(P) dependent steroid dehydrogenase-like [Source:MGI Symbol;Acc:MGI:1099438]	-	411	428	442	446	363	454	438	432	453	425	6.23265	6.54237	6.05103	6.8986	5.89644	7.16242	6.85231	6.85456	7.57452	6.6426
ENSMUSG00000042834	844.96	914.207	707.534	811.496	671.942	978.304	1097.57	828.987	915.828	855.687	-0.243578	0.00997014	0.63551	Nrep	18	33437019	33464029	-	2513	protein_coding	neuronal regeneration related protein [Source:MGI Symbol;Acc:MGI:99444]	-	879	932	805	820	646	962	1091	817	848	849	15.1331	16.174	12.5116	14.3996	11.9131	17.2301	19.3775	14.7173	16.0976	15.0649
ENSMUSG00000020889	1520.74	1451.74	1376.4	1488.4	1295	1638.3	1822.9	1533.17	1563.82	1817.2	-0.231882	0.000411096	0.198502	Nr1d1	11	98767932	98775333	-	3077	protein_coding	nuclear receptor subfamily 1, group D, member 1 [Source:MGI Symbol;Acc:MGI:2444210]	THR-like	1582	1480	1566	1504	1245	1611	1812	1511	1448	1803	22.2439	20.9762	19.878	21.5699	18.7511	23.5654	26.2842	22.2297	22.4492	26.1288
ENSMUSG00000036437	359.516	312.91	412.216	340.432	386.939	263.39	277.661	336.871	321.836	358.804	0.218169	0.0353715	0.879496	Npy1r	8	66697192	66706792	+	3454	protein_coding	neuropeptide Y receptor Y1 [Source:MGI Symbol;Acc:MGI:104963]	-	374	319	469	344	372	259	276	332	298	356	4.6847	4.02774	5.30346	4.39505	4.99121	3.37507	3.56658	4.35124	4.11579	4.59598
ENSMUSG00000041616	0.961274	3.92363	1.75785	4.94814	3.12047	27.4576	7.04212	3.04402	3.23996	4.03151	-1.61718	0.0295994	1	Nppa	4	148000722	148002079	+	865	protein_coding	natriuretic peptide type A [Source:MGI Symbol;Acc:MGI:97367]	-	1	4	2	5	3	27	7	3	3	4	0.0500169	0.201668	0.0903073	0.255083	0.160728	1.40493	0.361199	0.157001	0.165449	0.206203
ENSMUSG00000041560	1315.02	1327.17	1255.98	1171.72	1238.83	1344.41	1349.07	1338.35	1467.7	1365.67	-0.121503	0.0180651	0.775371	Nop53	7	15936183	15946074	-	3847	protein_coding	NOP53 ribosome biogenesis factor [Source:MGI Symbol;Acc:MGI:2154441]	-	1368	1353	1429	1184	1191	1322	1341	1319	1359	1355	15.385	15.338	14.5084	13.5818	14.3475	15.4673	15.5586	15.521	16.8522	15.7061
ENSMUSG00000032271	17.3029	10.79	16.6996	18.8029	23.9236	7.11864	6.03611	9.13205	10.7999	12.0945	0.952726	0.010772	0.659332	Nnmt	9	48591877	48605153	-	1576	protein_coding	nicotinamide N-methyltransferase [Source:MGI Symbol;Acc:MGI:1099443]	-	18	11	19	19	23	7	6	9	10	12	0.494139	0.304389	0.470876	0.532016	0.676327	0.199916	0.169926	0.258514	0.302693	0.339528
ENSMUSG00000063445	262.428	234.437	319.929	289.961	270.441	323.39	349.088	280.05	314.276	312.442	-0.196068	0.0425374	0.905032	Nmral1	16	4710059	4719356	-	3891	protein_coding	NmrA-like family domain containing 1 [Source:MGI Symbol;Acc:MGI:1915074]	-	273	239	364	293	260	318	347	276	291	310	3.03553	2.67873	3.65384	3.32303	3.09669	3.67851	3.98046	3.21104	3.56772	3.55264
ENSMUSG00000017376	710.381	721.949	698.745	695.709	681.303	617.288	670.008	655.478	630.712	615.813	0.137504	0.0138565	0.70848	Nlk	11	78567168	78697373	-	5447	protein_coding	nemo like kinase [Source:MGI Symbol;Acc:MGI:1201387]	-	739	736	795	703	655	607	666	646	584	611	5.86975	5.89269	5.70057	5.69542	5.57275	5.01577	5.45735	5.36874	5.11463	5.00189
ENSMUSG00000069670	523.894	471.817	460.557	574.974	468.071	674.237	639.827	535.747	600.472	598.679	-0.287183	0.00051669	0.214037	Nkain2	10	31689310	32890462	-	4710	protein_coding	Na+/K+ transporting ATPase interacting 2 [Source:MGI Symbol;Acc:MGI:1923447]	-	545	481	524	581	450	663	636	528	556	594	5.0062	4.45366	4.34529	5.44356	4.42769	6.33576	6.027	5.0747	5.63135	5.62362
ENSMUSG00000029432	1509.2	1377.2	1335.97	1377.56	1298.12	1493.9	1577.44	1436.78	1516.3	1510.81	-0.127335	0.013798	0.70848	Nipsnap2	5	129725063	129758327	+	2750	protein_coding	nipsnap homolog 2 [Source:MGI Symbol;Acc:MGI:1278343]	-	1570	1404	1520	1392	1248	1469	1568	1416	1404	1499	24.7001	22.2652	21.5884	22.3375	21.0314	24.0434	25.4494	23.3092	24.3553	24.3063
ENSMUSG00000041377	29.7995	37.2745	18.4574	40.5748	23.9236	34.5762	50.3009	51.7483	47.5194	39.3072	-0.578491	0.0175905	0.774253	Ninj2	6	120093350	120200339	+	937	protein_coding	ninjurin 2 [Source:MGI Symbol;Acc:MGI:1352751]	-	31	38	21	41	23	34	50	51	44	39	1.43138	1.76863	0.875364	1.93095	1.13756	1.63322	2.38174	2.46393	2.24012	1.85599
ENSMUSG00000001056	285.498	261.903	241.704	230.584	219.473	334.576	322.932	258.741	286.196	323.528	-0.300031	0.00290047	0.447299	Nhp2	11	51619735	51623714	+	1146	protein_coding	NHP2 ribonucleoprotein [Source:MGI Symbol;Acc:MGI:1098547]	-	297	267	275	233	211	329	321	255	265	321	11.2125	10.1606	9.37253	8.9722	8.53264	12.9216	12.5022	10.0729	11.0311	12.4902
ENSMUSG00000044231	435.457	442.39	398.153	427.52	439.987	379.322	352.106	355.135	413.635	398.111	0.175013	0.0175547	0.774253	Nhlrc1	13	47012557	47014850	-	2294	protein_coding	NHL repeat containing 1 [Source:MGI Symbol;Acc:MGI:2145264]	-	453	451	453	432	423	373	350	350	383	395	8.54353	8.57385	7.71283	8.31032	8.5454	7.31849	6.80988	6.90672	7.96461	7.67811
ENSMUSG00000048540	190.332	206.972	208.305	157.351	217.393	349.83	223.336	234.389	244.077	215.686	-0.370297	0.00706111	0.563875	Nhlh2	3	102010076	102015492	+	5417	protein_coding	nescient helix loop helix 2 [Source:MGI Symbol;Acc:MGI:97324]	bHLH	198	211	237	159	209	344	222	231	226	214	1.58139	1.6987	1.70883	1.29529	1.78802	2.85828	1.82919	1.93041	1.99025	1.76159
ENSMUSG00000051251	1.92255	0	0	0	0	6.10169	1.00602	2.02934	7.5599	3.02363	-3.30887	0.00745868	1	Nhlh1	1	172052292	172057573	-	2464	protein_coding	nescient helix loop helix 1 [Source:MGI Symbol;Acc:MGI:98481]	bHLH	2	0	0	0	0	6	1	2	7	3	0.0351174	0	0	0	0	0.109601	0.0181144	0.036744	0.135524	0.0542914
ENSMUSG00000006435	1805.27	1630.27	1872.99	1846.65	1924.29	1568.13	1479.85	1726.97	1763.62	1776.89	0.126943	0.0479412	0.921416	Neurl1a	19	47178820	47259440	+	4411	protein_coding	neuralized E3 ubiquitin protein ligase 1A [Source:MGI Symbol;Acc:MGI:1334263]	-	1878	1662	2131	1866	1850	1542	1471	1702	1633	1763	18.4201	16.4319	18.8693	18.6682	19.4366	15.7345	14.8847	17.4671	17.6607	17.8224
ENSMUSG00000004891	257.621	228.552	202.153	206.832	205.951	326.44	247.48	257.727	296.996	245.922	-0.319559	0.00324106	0.447712	Nes	3	87971078	87980451	+	6416	protein_coding	nestin [Source:MGI Symbol;Acc:MGI:101784]	-	268	233	230	209	198	321	246	254	275	244	1.80719	1.58374	1.40014	1.43751	1.43017	2.25189	1.71134	1.79212	2.04469	1.69581
ENSMUSG00000010376	1290.99	1270.28	1157.54	1223.18	1227.39	1279.32	1263.56	1312.99	1443.94	1410.02	-0.121184	0.0277006	0.845499	Nedd8	14	55662263	55672124	-	1261	protein_coding	neural precursor cell expressed, developmentally down-regulated gene 8 [Source:MGI Symbol;Acc:MGI:97301]	-	1343	1295	1317	1236	1180	1258	1256	1294	1337	1399	46.078	44.7865	40.7924	43.2545	43.3663	44.9026	44.4569	46.4533	50.5796	49.4713
ENSMUSG00000032216	9652.15	10222	10788.8	10067.5	10621.1	9513.55	9506.87	9907.26	9304.08	9862.07	0.0945525	0.0167767	0.774199	Nedd4	9	72662346	72749852	+	10973	protein_coding	neural precursor cell expressed, developmentally down-regulated 4 [Source:MGI Symbol;Acc:MGI:97297]	-	10041	10421	12275	10173	10211	9355	9450	9764	8615	9785	39.5899	41.4168	43.6923	40.912	43.1249	38.3729	38.4389	40.281	37.4532	39.7636
ENSMUSG00000031837	1211.2	1353.65	1125.9	1265.74	1060.96	2468.13	1646.85	1220.65	1383.46	1260.85	-0.407249	0.0440552	0.910488	Necab2	8	119446719	119472640	+	2096	protein_coding	N-terminal EF-hand calcium binding protein 2 [Source:MGI Symbol;Acc:MGI:2152211]	-	1260	1380	1281	1279	1020	2427	1637	1203	1281	1251	26.0083	28.7131	23.8708	26.9282	22.5525	52.1176	34.8596	25.9819	29.1553	26.6144
ENSMUSG00000024038	1027.6	932.844	888.593	862.956	931.981	1002.71	1092.54	932.484	1113.47	976.633	-0.140003	0.036903	0.885852	Ndufv3	17	31520115	31531326	+	2490	protein_coding	NADH:ubiquinone oxidoreductase core subunit V3 [Source:MGI Symbol;Acc:MGI:1890894]	-	1069	951	1011	872	896	986	1086	919	1031	969	18.5742	16.6561	15.8584	15.4541	16.6761	17.8231	19.4668	16.7076	19.7523	17.353
ENSMUSG00000024099	2045.59	1854.9	1972.31	1886.23	1958.62	2158.98	2025.11	2007.02	2207.49	2058.08	-0.105393	0.0227196	0.83144	Ndufv2	17	66078638	66101559	-	2147	protein_coding	NADH:ubiquinone oxidoreductase core subunit V2 [Source:MGI Symbol;Acc:MGI:1920150]	-	2128	1891	2244	1906	1883	2123	2013	1978	2044	2042	42.8817	38.4107	40.8225	39.1758	40.6447	44.5065	41.8482	41.7053	45.4159	42.4106
ENSMUSG00000037916	2606.01	2696.52	2327.39	2445.37	2438.13	2637.96	2652.87	2601.62	2950.52	2708.16	-0.114911	0.0300457	0.856052	Ndufv1	19	4007497	4012806	-	2521	protein_coding	NADH:ubiquinone oxidoreductase core subunit V1 [Source:MGI Symbol;Acc:MGI:107851]	-	2711	2749	2648	2471	2344	2594	2637	2564	2732	2687	46.5253	47.5548	41.0255	43.2541	43.0894	46.313	46.6876	46.0408	51.6972	47.5276
ENSMUSG00000021606	735.374	677.808	574.817	643.259	611.613	749.491	719.303	673.742	854.269	737.766	-0.203511	0.0114945	0.67732	Ndufs6	13	73319838	73328542	-	898	protein_coding	NADH:ubiquinone oxidoreductase core subunit S6 [Source:MGI Symbol;Acc:MGI:107932]	-	765	691	654	650	588	737	715	664	791	732	36.8568	33.5579	28.4453	31.9422	30.3449	36.94	35.5381	33.4726	42.0203	36.3484
ENSMUSG00000028648	1372.7	1301.67	1223.46	1279.59	1286.68	1397.29	1451.68	1320.09	1504.42	1324.35	-0.114425	0.0335422	0.860175	Ndufs5	4	123712710	123718202	-	860	protein_coding	NADH:ubiquinone oxidoreductase core subunit S5 [Source:MGI Symbol;Acc:MGI:1890889]	-	1428	1327	1392	1293	1237	1374	1443	1301	1393	1314	71.8393	67.2923	63.2193	66.348	66.6587	71.9108	74.8915	68.482	77.2701	68.1314
ENSMUSG00000025204	1360.2	1227.12	1270.93	1256.83	1208.66	1409.49	1378.24	1279.5	1518.46	1431.18	-0.149484	0.00774727	0.597109	Ndufb8	19	44548572	44555440	-	3146	protein_coding	NADH:ubiquinone oxidoreductase subunit B8 [Source:MGI Symbol;Acc:MGI:1914514]	-	1415	1251	1446	1270	1162	1386	1370	1261	1406	1420	19.4594	17.3417	17.9522	17.8145	17.1172	19.8294	19.4369	18.1449	21.3199	20.1271
ENSMUSG00000071014	693.078	716.063	633.705	638.311	593.93	738.305	751.495	675.772	822.949	707.529	-0.173734	0.0153282	0.742764	Ndufb6	4	40270591	40279421	-	659	protein_coding	NADH:ubiquinone oxidoreductase subunit B6 [Source:MGI Symbol;Acc:MGI:2684983]	-	721	730	721	645	571	726	747	666	762	702	47.335	48.3093	42.7325	43.1919	40.1547	49.5858	50.5941	45.7495	55.1605	47.501
ENSMUSG00000031059	1291.95	1268.31	1149.63	1163.8	1145.21	1338.3	1305.81	1250.08	1451.5	1308.22	-0.14437	0.0122841	0.693529	Ndufb11	X	20615326	20617619	-	908	protein_coding	NADH:ubiquinone oxidoreductase subunit B11 [Source:MGI Symbol;Acc:MGI:1349919]	-	1344	1293	1308	1176	1101	1316	1298	1232	1344	1298	64.0392	62.102	56.264	57.1543	56.1936	65.2343	63.8048	61.4218	70.611	63.744
ENSMUSG00000040048	1750.48	1768.58	1651.5	1668.51	1777.63	1802.03	1935.58	1799.01	1905.1	1747.66	-0.0930581	0.0453291	0.915163	Ndufb10	17	24722060	24724478	-	1217	protein_coding	NADH:ubiquinone oxidoreductase subunit B10 [Source:MGI Symbol;Acc:MGI:1915592]	-	1821	1803	1879	1686	1709	1772	1924	1773	1764	1734	64.7369	64.6097	60.3039	61.1357	65.0784	65.5359	70.5633	65.9501	69.146	63.5344
ENSMUSG00000113902	444.108	318.795	315.534	345.38	334.931	370.169	384.299	446.456	475.194	404.159	-0.241867	0.0217504	0.819599	Ndufb1-ps	12	101968090	101977068	-	1153	bidirectional_promoter_lncRNA	NADH:ubiquinone oxidoreductase subunit B1 [Source:MGI Symbol;Acc:MGI:3780865]	-	462	325	359	349	322	364	382	440	440	401	17.3359	12.2927	12.1611	13.3575	12.9423	14.2095	14.7876	17.2751	18.2046	15.5084
ENSMUSG00000023089	1331.36	1132.95	1103.93	1104.43	1133.77	1390.17	1352.09	1274.43	1374.82	1228.6	-0.189092	0.003021	0.447299	Ndufa5	6	24518666	24528013	-	1032	protein_coding	NADH:ubiquinone oxidoreductase subunit A5 [Source:MGI Symbol;Acc:MGI:1915452]	-	1385	1155	1256	1116	1090	1367	1344	1256	1273	1219	58.0634	48.8085	47.5356	47.7213	48.9477	59.6204	58.1278	55.0944	58.8447	52.6714
ENSMUSG00000005125	1954.27	2374.78	1936.27	2208.85	2033.51	2738.64	2405.39	2195.75	2218.29	2170.97	-0.158851	0.0356522	0.882823	Ndrg1	15	66929318	66969640	-	6596	protein_coding	N-myc downstream regulated gene 1 [Source:MGI Symbol;Acc:MGI:1341799]	-	2033	2421	2203	2232	1955	2693	2391	2164	2054	2154	13.3349	16.0069	13.045	14.9328	13.7357	18.3764	16.1794	14.8516	14.8552	14.5618
ENSMUSG00000028070	867.069	837.696	849.92	797.641	829.006	874.576	883.284	951.763	997.907	1018.96	-0.176289	0.00305754	0.447299	Naxe	3	88056520	88058495	-	908	protein_coding	NAD(P)HX epimerase [Source:MGI Symbol;Acc:MGI:2180167]	-	902	854	967	806	797	860	878	938	924	1011	42.9787	41.0171	41.5958	39.1721	40.6778	42.6303	43.1592	46.7643	48.5451	49.6496
ENSMUSG00000035285	1054.52	983.851	1009.88	972.805	1022.48	820.677	844.049	943.645	993.587	906.081	0.162452	0.00787932	0.598481	Nat14	7	4922028	4925006	+	2080	protein_coding	N-acetyltransferase 14 [Source:MGI Symbol;Acc:MGI:3039561]	-	1097	1003	1149	983	983	807	839	930	920	899	22.8179	21.0296	21.5757	20.8554	21.9016	17.4629	18.0038	20.2403	21.1	19.2729
ENSMUSG00000058799	3091.46	3049.65	3295.97	3317.24	3236.97	3393.56	3343	3350.45	3508.87	3451.98	-0.0921405	0.0178646	0.774253	Nap1l1	10	111473223	111498150	+	4994	protein_coding	nucleosome assembly protein 1-like 1 [Source:MGI Symbol;Acc:MGI:1855693]	-	3216	3109	3750	3352	3112	3337	3323	3302	3249	3425	27.8612	27.1497	29.3286	29.6199	28.8786	30.0755	29.6993	29.9313	31.0356	30.5818
ENSMUSG00000020572	793.051	800.421	800.701	799.62	771.797	925.423	806.826	892.912	846.709	905.073	-0.142282	0.00981735	0.63551	Nampt	12	32819545	32853349	+	5054	protein_coding	nicotinamide phosphoribosyltransferase [Source:MGI Symbol;Acc:MGI:1929865]	-	825	816	911	808	742	910	802	880	784	898	7.06238	7.04122	7.04031	7.05511	6.80384	8.10424	7.08278	7.88215	7.40014	7.92304
ENSMUSG00000021640	0	1.96182	0.878925	1.97926	2.08032	0	8.04814	5.07336	6.47992	4.03151	-1.79068	0.0448599	1	Naip1	13	100407764	100452869	-	5536	protein_coding	NLR family, apoptosis inhibitory protein 1 [Source:MGI Symbol;Acc:MGI:1298223]	-	0	2	1	2	2	0	8	5	6	4	0	0.0157553	0.00705526	0.0159427	0.0167425	0	0.0644998	0.0408857	0.0517028	0.0322192
ENSMUSG00000029063	1075.67	1188.86	1272.68	1089.58	1240.91	1057.63	1092.54	1092.8	1033.55	1102.62	0.125503	0.0333605	0.860175	Nadk	4	155562378	155591001	+	3747	protein_coding	NAD kinase [Source:MGI Symbol;Acc:MGI:2183149]	-	1119	1212	1448	1101	1193	1040	1086	1077	957	1094	12.9205	14.1063	15.0936	12.9668	14.7551	12.4927	12.9363	13.0116	12.1839	13.0192
ENSMUSG00000026697	94.2048	119.671	160.843	107.87	118.578	211.525	102.614	157.274	160.918	177.386	-0.427556	0.0172387	0.774253	Myoc	1	162639155	162649693	+	2074	protein_coding	myocilin [Source:MGI Symbol;Acc:MGI:1202864]	-	98	122	183	109	114	208	102	155	149	176	2.04432	2.56533	3.44628	2.31924	2.54731	4.51399	2.19511	3.38314	3.42718	3.78403
ENSMUSG00000035441	393.161	412.963	302.35	373.09	292.284	460.678	495.967	440.368	401.755	400.127	-0.310399	0.00320815	0.447712	Myo1d	11	80482126	80780025	-	6465	protein_coding	myosin ID [Source:MGI Symbol;Acc:MGI:107728]	-	409	421	344	377	281	453	493	434	372	397	2.73708	2.83992	2.07825	2.57336	2.0143	3.15381	3.40364	3.03892	2.74494	2.73825
ENSMUSG00000025912	55.7539	69.6445	64.1615	76.2014	56.1685	105.763	101.608	112.629	55.0793	79.6223	-0.499785	0.00929999	0.628017	Mybl1	1	9667415	9700209	-	5402	protein_coding	myeloblastosis oncogene-like 1 [Source:MGI Symbol;Acc:MGI:99925]	MYB	58	71	73	77	54	104	101	111	51	79	0.464522	0.573187	0.527809	0.629019	0.46326	0.866532	0.83451	0.930177	0.450375	0.652113
ENSMUSG00000006517	364.323	298.196	302.35	415.644	329.73	398.644	419.509	406.884	448.194	459.592	-0.319185	0.000862627	0.242507	Mvd	8	122433601	122443422	-	1859	protein_coding	mevalonate (diphospho) decarboxylase [Source:MGI Symbol;Acc:MGI:2179327]	-	379	304	344	420	317	392	417	401	415	456	8.82048	7.1316	7.2275	9.97005	7.90251	9.49101	10.012	9.76478	10.6495	10.938
ENSMUSG00000023921	701.73	735.681	746.207	751.128	817.564	692.542	693.146	718.388	619.912	635.97	0.158369	0.0138014	0.70848	Mut	17	40934685	40961988	+	3786	protein_coding	methylmalonyl-Coenzyme A mutase [Source:MGI Symbol;Acc:MGI:97239]	-	730	750	849	759	786	681	689	708	574	631	8.34209	8.6392	8.75862	8.84685	9.62116	8.09604	8.12275	8.46545	7.23253	7.43189
ENSMUSG00000057280	4.80637	3.92363	5.27355	5.93777	4.16063	37.6271	21.1264	8.11738	2.15997	8.06301	-1.67822	0.00593923	0.529976	Musk	4	58285960	58374303	+	3776	protein_coding	muscle, skeletal, receptor tyrosine kinase [Source:MGI Symbol;Acc:MGI:103581]	-	5	4	6	6	4	37	21	8	2	8	0.0572889	0.0461978	0.0620623	0.0701208	0.0490923	0.441038	0.248229	0.0959081	0.0252672	0.0944732
ENSMUSG00000029267	676.737	687.617	717.203	697.688	774.918	817.627	783.688	791.444	728.991	749.86	-0.124206	0.0379005	0.887644	Mtf2	5	108065674	108109004	+	5698	protein_coding	metal response element binding transcription factor 2 [Source:MGI Symbol;Acc:MGI:105050]	-	704	701	816	705	745	804	779	780	675	744	5.34543	5.36523	5.59341	5.46002	6.05925	6.35096	6.1021	6.19683	5.65119	5.82239
ENSMUSG00000064348	210.519	193.239	171.39	186.05	185.148	235.932	240.438	208.008	208.437	261.04	-0.287564	0.0045228	0.486127	mt-Tn	MT	5089	5159	-	71	Mt_tRNA	mitochondrially encoded tRNA asparagine [Source:MGI Symbol;Acc:MGI:102479]	-	219	197	195	188	178	232	239	205	193	259	133.45	121.004	107.272	116.85	116.184	147.074	150.246	130.705	129.675	162.664
ENSMUSG00000064354	957.429	927.94	805.974	990.618	849.809	1364.74	1191.13	846.237	998.987	961.514	-0.243104	0.0252356	0.845499	mt-Co2	MT	7013	7696	+	684	protein_coding	mitochondrially encoded cytochrome c oxidase II [Source:MGI Symbol;Acc:MGI:102503]	-	996	946	917	1001	817	1342	1184	834	925	954	62.9993	60.3154	52.3627	64.5811	55.3543	88.3085	77.261	55.196	64.5126	62.1932
ENSMUSG00000031604	1290.03	1267.33	1299.05	1478.51	1359.49	1363.73	1432.57	1537.23	1691.26	1554.15	-0.178989	0.00648211	0.539131	Msmo1	8	64718139	64733792	-	6144	protein_coding	methylsterol monoxygenase 1 [Source:MGI Symbol;Acc:MGI:1913484]	-	1342	1292	1478	1494	1307	1341	1424	1515	1566	1542	9.45004	9.17074	9.39576	10.7307	9.85847	9.82389	10.3448	11.1624	12.159	11.1914
ENSMUSG00000060679	447.954	477.703	407.821	442.364	485.754	473.898	529.165	488.057	510.833	491.844	-0.142459	0.0429885	0.905032	Mrps9	1	42851233	42905683	+	5763	protein_coding	mitochondrial ribosomal protein S9 [Source:MGI Symbol;Acc:MGI:1916777]	-	466	487	464	447	467	466	526	481	473	488	3.4984	3.6853	3.14469	3.42284	3.75538	3.63951	4.07382	3.77828	3.91536	3.77591
ENSMUSG00000029918	401.812	409.039	378.817	416.634	443.107	476.949	415.485	476.896	460.074	437.418	-0.146712	0.043082	0.905032	Mrps33	6	39801804	39810988	-	1667	protein_coding	mitochondrial ribosomal protein S33 [Source:MGI Symbol;Acc:MGI:1338046]	-	418	417	431	421	426	469	413	470	426	434	10.8486	10.9092	10.0984	11.1448	11.8429	12.6632	11.0581	12.7632	12.1908	11.6093
ENSMUSG00000034932	333.562	284.464	277.74	321.629	293.325	358.983	346.07	314.548	407.155	346.71	-0.230997	0.00967186	0.63551	Mrpl54	10	81264713	81266934	-	825	protein_coding	mitochondrial ribosomal protein L54 [Source:MGI Symbol;Acc:MGI:1913297]	-	347	290	316	325	282	353	344	310	377	344	18.1973	15.3298	14.9604	17.3843	15.8409	19.2587	18.611	17.01	21.7995	18.5932
ENSMUSG00000030706	911.287	859.276	803.337	804.568	812.363	971.186	888.314	903.058	928.788	911.121	-0.135127	0.0165258	0.770157	Mrpl48	7	100545751	100608301	-	8152	protein_coding	mitochondrial ribosomal protein L48 [Source:MGI Symbol;Acc:MGI:1289321]	-	948	876	914	813	781	955	883	890	860	904	5.03126	4.68633	4.37916	4.40103	4.43989	5.27285	4.83461	4.94223	5.03261	4.94487
ENSMUSG00000022889	425.844	417.867	397.274	389.914	433.746	454.576	439.63	471.823	516.233	437.418	-0.167862	0.0199618	0.815612	Mrpl39	16	84717576	84735742	-	2533	protein_coding	mitochondrial ribosomal protein L39 [Source:MGI Symbol;Acc:MGI:1351620]	-	443	426	452	394	417	447	437	465	478	434	7.56661	7.33445	6.96967	6.86418	7.62933	7.94288	7.70036	8.31027	9.00226	7.64021
ENSMUSG00000002767	545.042	452.199	433.31	504.711	442.067	541.017	584.496	488.057	536.753	545.261	-0.181554	0.023484	0.836726	Mrpl2	17	46646229	46650139	+	1170	protein_coding	mitochondrial ribosomal protein L2 [Source:MGI Symbol;Acc:MGI:1351622]	-	567	461	493	510	425	532	581	481	497	541	20.9667	17.1834	16.4577	19.2359	16.834	20.4659	22.1643	18.6104	20.2642	20.6187
ENSMUSG00000024902	573.88	569.908	469.346	497.783	529.44	568.474	581.478	562.128	612.352	583.561	-0.13988	0.0479911	0.921416	Mrpl11	19	4962306	4966995	+	2882	protein_coding	mitochondrial ribosomal protein L11 [Source:MGI Symbol;Acc:MGI:2137215]	-	597	581	534	503	509	559	578	554	567	579	8.96216	8.79174	7.23696	7.70197	8.18482	8.73019	8.95156	8.70188	9.3853	8.9585
ENSMUSG00000020381	130.733	94.1672	84.3768	110.838	100.895	128.136	139.836	147.127	136.078	106.835	-0.338043	0.0179718	0.774253	Mrnip	11	50174444	50200115	+	2039	protein_coding	MRN complex interacting protein [Source:MGI Symbol;Acc:MGI:1915317]	-	136	96	96	112	97	126	139	145	126	106	2.88572	2.05327	1.83892	2.42398	2.20465	2.78137	3.04272	3.2192	2.9479	2.31814
ENSMUSG00000026568	1052.59	1049.57	967.696	997.546	928.861	1046.44	1081.47	1120.2	1175.02	1020.98	-0.12335	0.0336489	0.860175	Mpc2	1	165460637	165481214	+	7344	protein_coding	mitochondrial pyruvate carrier 2 [Source:MGI Symbol;Acc:MGI:1917706]	-	1095	1070	1101	1008	893	1029	1075	1104	1088	1013	6.45081	6.35395	5.85549	6.05697	5.63513	6.3065	6.53342	6.80509	7.06733	6.15074
ENSMUSG00000076439	1075.67	1162.38	1012.52	1129.17	995.431	1450.17	1371.2	1177.02	1235.5	1109.67	-0.239104	0.0018571	0.366492	Mog	17	37010743	37023398	-	1704	protein_coding	myelin oligodendrocyte glycoprotein [Source:MGI Symbol;Acc:MGI:97435]	-	1119	1185	1152	1141	957	1426	1363	1160	1144	1101	28.4114	30.3279	26.4053	29.5491	26.0272	37.6665	35.7019	30.8167	32.0269	28.8117
ENSMUSG00000029436	1336.17	1171.2	1436.16	1372.62	1592.48	1087.12	1048.27	1272.4	1249.54	1329.39	0.206582	0.0154951	0.74692	Mmp17	5	129584169	129611099	+	6619	protein_coding	matrix metallopeptidase 17 [Source:MGI Symbol;Acc:MGI:1346076]	-	1390	1194	1634	1387	1531	1069	1042	1254	1157	1319	9.08563	7.86692	9.64203	9.24723	10.7193	7.26928	7.02652	8.57635	8.33873	8.88593
ENSMUSG00000048578	4347.84	4719.15	4613.48	4148.52	4754.56	3733.22	3888.26	4263.65	4291.86	4337.9	0.138637	0.0139809	0.712699	Mlec	5	115142981	115158179	-	6007	protein_coding	malectin [Source:MGI Symbol;Acc:MGI:1924015]	-	4523	4811	5249	4192	4571	3671	3865	4202	3974	4304	32.5763	34.9277	34.1293	30.7958	35.2646	27.5063	28.7182	31.6662	31.5594	31.9496
ENSMUSG00000096098	0	0	0	0	0	2.0339	0	2.02934	2.15997	4.03151	-3.52443	0.0201955	1	Mir713	13	62760739	62760846	+	108	miRNA	microRNA 713 [Source:MGI Symbol;Acc:MGI:3629909]	-	0	0	0	0	0	2	0	2	2	4	0	0	0	0	0	0.833513	0	0.838308	0.883416	1.65153
ENSMUSG00000020486	3672.07	3562.66	3013.83	3670.53	2872.92	4744.06	4644.78	3944.03	4153.63	4064.77	-0.360031	4.67549e-06	0.0116106	Sept4	11	87568903	87590539	+	3563	protein_coding	septin 4 [Source:MGI Symbol;Acc:MGI:1270156]	-	3820	3632	3429	3709	2762	4665	4617	3887	3846	4033	46.3853	44.4552	37.589	45.9376	35.9247	58.9307	57.8374	49.3851	51.4935	50.4735
ENSMUSG00000002580	167.262	187.354	175.785	184.071	146.662	156.61	142.855	141.039	155.518	134.048	0.24003	0.0284177	0.845499	Mien1	11	98437708	98438991	-	747	protein_coding	migration and invasion enhancer 1 [Source:MGI Symbol;Acc:MGI:1913678]	-	174	191	200	186	141	154	142	139	144	133	10.0777	11.1508	10.4573	10.988	8.7475	9.2791	8.48462	8.42348	9.19604	7.93929
ENSMUSG00000008035	2029.25	1975.55	1791.25	1823.89	1828.6	1951.52	2049.26	2132.84	2417.01	2173.99	-0.182577	0.00320301	0.447712	Mid1ip1	X	10715013	10719690	+	2128	protein_coding	Mid1 interacting protein 1 (gastrulation specific G12-like (zebrafish)) [Source:MGI Symbol;Acc:MGI:1915291]	-	2111	2014	2038	1843	1758	1919	2037	2102	2238	2157	42.919	41.2744	37.406	38.2192	38.2853	40.5891	42.7252	44.7155	50.1704	45.199
ENSMUSG00000027775	442.186	457.103	384.09	466.115	460.79	480	486.913	506.321	524.873	453.545	-0.150687	0.0434215	0.905032	Mfsd1	3	67582741	67604237	+	3042	protein_coding	major facilitator superfamily domain containing 1 [Source:MGI Symbol;Acc:MGI:1914118]	-	460	466	437	471	443	472	484	499	486	450	6.54231	6.68066	5.61088	6.83265	6.74885	6.98375	7.10151	7.42572	7.62142	6.59635
ENSMUSG00000002274	119.198	85.3391	91.4082	105.89	89.4536	108.813	102.614	123.79	154.438	114.898	-0.297358	0.0447773	0.913452	Metrn	17	25794571	25797136	-	1434	protein_coding	meteorin, glial cell differentiation regulator [Source:MGI Symbol;Acc:MGI:1917333]	-	124	87	104	107	86	107	102	122	143	114	3.74115	2.64584	2.83265	3.29278	2.77929	3.35846	3.17479	3.85131	4.75714	3.54492
ENSMUSG00000036466	757.484	726.853	767.301	705.605	707.307	889.83	940.627	707.227	753.83	817.388	-0.165001	0.0329144	0.860175	Megf11	9	64385626	64709205	+	11181	protein_coding	multiple EGF-like-domains 11 [Source:MGI Symbol;Acc:MGI:1920951]	-	788	741	873	713	680	875	935	697	698	811	3.04915	2.89022	3.0496	2.81408	2.81847	3.52236	3.73246	2.82195	2.97806	3.23438
ENSMUSG00000001419	3189.51	3243.86	3334.64	3474.59	3294.18	3076.27	3120.67	3191.14	2971.04	3228.23	0.0851412	0.03328	0.860175	Mef2d	3	88142372	88172086	+	5985	protein_coding	myocyte enhancer factor 2D [Source:MGI Symbol;Acc:MGI:99533]	SRF	3318	3307	3794	3511	3167	3025	3102	3145	2751	3203	23.9853	24.097	24.7595	25.8877	24.5228	22.7493	23.1336	23.7878	21.9273	23.864
ENSMUSG00000032418	1237.16	1155.51	1086.35	1142.03	1080.72	1225.42	1212.25	1173.98	1294.9	1260.85	-0.113052	0.0347324	0.871217	Me1	9	86581371	86695953	-	3848	protein_coding	malic enzyme 1, NADP(+)-dependent, cytosolic [Source:MGI Symbol;Acc:MGI:97043]	-	1287	1178	1236	1154	1039	1205	1205	1157	1199	1251	14.4702	13.3507	12.5456	13.2342	12.5131	14.0948	13.9771	13.6112	14.8643	14.4968
ENSMUSG00000002329	593.106	610.125	552.844	608.622	556.484	649.83	662.966	600.686	695.511	609.765	-0.139765	0.0307384	0.856052	Mdp1	14	55657879	55660508	-	2032	protein_coding	magnesium-dependent phosphatase 1 [Source:MGI Symbol;Acc:MGI:1915131]	-	617	622	629	615	535	639	659	592	644	605	13.1369	13.3493	12.0903	13.3561	12.2016	14.1541	14.4753	13.1885	15.1189	13.2765
ENSMUSG00000009647	423.922	458.084	414.853	463.146	412.943	413.898	525.141	472.837	494.634	521.072	-0.160149	0.0429947	0.905032	Mcu	10	59446984	59616692	-	6936	protein_coding	mitochondrial calcium uniporter [Source:MGI Symbol;Acc:MGI:3026965]	-	441	467	472	468	397	407	522	466	458	517	2.75082	2.9363	2.65792	2.97759	2.65257	2.64114	3.35912	3.0414	3.15003	3.32378
ENSMUSG00000002870	70.173	72.5872	91.4082	89.0666	92.5741	94.5762	96.5777	85.2325	117.718	117.922	-0.299302	0.046132	0.916309	Mcm2	6	88883474	88898780	-	6956	protein_coding	minichromosome maintenance complex component 2 [Source:MGI Symbol;Acc:MGI:105380]	-	73	74	104	90	89	93	96	84	109	117	0.454042	0.463943	0.583959	0.570966	0.592947	0.601768	0.615994	0.54666	0.747525	0.750027
ENSMUSG00000041607	48681.8	55427.2	49180.2	49569.5	44209.8	68789.4	59548.2	54634	57906.7	52394.5	-0.247327	0.000694614	0.223084	Mbp	18	82475146	82585637	+	8403	protein_coding	myelin basic protein [Source:MGI Symbol;Acc:MGI:96925]	-	50643	56506	55955	50089	42503	67643	59192	53844	53618	51985	260.746	293.26	260.084	263.048	234.407	362.322	314.408	290.068	304.393	275.864
ENSMUSG00000035596	5161.08	4645.58	5303.43	5164.87	5493.07	4074.91	4282.62	5160.62	4816.74	5099.86	0.136942	0.0497021	0.925979	Mboat7	7	3677789	3693523	-	8339	protein_coding	membrane bound O-acyltransferase domain containing 7 [Source:MGI Symbol;Acc:MGI:1924832]	-	5369	4736	6034	5219	5281	4007	4257	5086	4460	5060	27.8556	24.768	28.2618	27.6186	29.3486	21.6277	22.7853	27.6096	25.5141	27.0575
ENSMUSG00000027479	1405.38	1450.76	1400.13	1498.3	1439.58	1541.69	1610.63	1534.18	1595.14	1510.81	-0.115462	0.00772136	0.597109	Mapre1	2	153741274	153773310	+	7811	protein_coding	microtubule-associated protein, RP/EB family, member 1 [Source:MGI Symbol;Acc:MGI:891995]	-	1462	1479	1593	1514	1384	1516	1601	1512	1477	1499	8.09792	8.25761	7.96559	8.55356	8.21135	8.73572	9.14849	8.76279	9.02055	8.55748
ENSMUSG00000019996	1472.67	1546.89	1662.93	1591.32	1616.41	1813.22	1757.51	1696.53	1556.26	1720.45	-0.114988	0.0311193	0.856052	Map7	10	20148471	20281590	+	7935	protein_coding	microtubule-associated protein 7 [Source:MGI Symbol;Acc:MGI:1328328]	-	1532	1577	1892	1608	1554	1783	1747	1672	1441	1707	8.35304	8.66718	9.31286	8.94266	9.07589	10.1137	9.82677	9.53865	8.66315	9.59262
ENSMUSG00000014426	1215.05	1275.18	1313.11	1396.37	1412.53	1166.44	1163.96	1212.53	1271.14	1276.98	0.118225	0.0366348	0.885095	Map3k4	17	12227621	12318796	-	10181	protein_coding	mitogen-activated protein kinase kinase kinase 4 [Source:MGI Symbol;Acc:MGI:1346875]	-	1264	1300	1494	1411	1358	1147	1157	1195	1177	1267	5.37142	5.5686	5.73151	6.11595	6.18151	5.07083	5.07233	5.31343	5.51499	5.54928
ENSMUSG00000031224	330.678	313.891	386.727	424.551	448.308	304.068	317.902	341.945	345.596	333.607	0.212178	0.0366961	0.885095	Magee2	X	104854952	104857267	-	2316	protein_coding	melanoma antigen, family E, 2 [Source:MGI Symbol;Acc:MGI:2148316]	-	344	320	440	429	431	299	316	337	320	331	6.42617	6.02566	7.42033	8.17422	8.6243	5.81083	6.08994	6.58702	6.59129	6.37294
ENSMUSG00000031425	30810.7	30078.6	26163	32843.8	25432.9	44402	38191.5	35431.3	35818.8	33605.6	-0.367183	7.09558e-06	0.0154178	Plp1	X	136822671	136839733	+	5551	protein_coding	proteolipid protein (myelin) 1 [Source:MGI Symbol;Acc:MGI:97623]	-	32052	30664	29767	33188	24451	43662	37963	34919	33166	33343	249.814	240.908	209.446	263.838	204.132	354.029	305.249	284.766	285.024	267.845
ENSMUSG00000079018	518.127	628.762	566.028	442.364	659.46	476.949	539.226	502.263	454.674	472.694	0.20203	0.0418953	0.905032	Ly6c1	15	75044018	75048830	-	1677	protein_coding	lymphocyte antigen 6 complex, locus C1 [Source:MGI Symbol;Acc:MGI:96882]	-	539	641	644	447	634	469	536	495	421	469	13.9056	16.6693	14.999	11.7626	17.5203	12.5877	14.2658	13.3619	11.9759	12.4707
ENSMUSG00000033105	719.994	720.968	786.638	848.112	826.926	808.474	929.56	905.088	814.309	874.837	-0.151294	0.0250076	0.845499	Lss	10	76531588	76557138	+	10787	protein_coding	lanosterol synthase [Source:MGI Symbol;Acc:MGI:1336155]	-	749	735	895	857	795	795	924	892	754	868	3.0041	2.97153	3.24064	3.50597	3.41548	3.31721	3.82328	3.74336	3.33449	3.58814
ENSMUSG00000035215	583.493	472.798	451.767	440.385	427.505	478.983	589.526	552.996	559.433	561.387	-0.206531	0.0229573	0.833379	Lsm7	10	80852821	80855209	-	1601	protein_coding	LSM7 homolog, U6 small nuclear RNA and mRNA degradation associated [Source:MGI Symbol;Acc:MGI:1913344]	-	607	482	514	445	411	471	586	545	518	557	16.4032	13.1295	12.5395	12.2658	11.897	13.2414	16.3369	15.41	15.4347	15.5137
ENSMUSG00000031848	534.468	493.397	479.893	460.177	482.633	517.627	554.316	549.952	561.593	572.474	-0.169249	0.00946433	0.632763	Lsm4	8	70673248	70678752	+	1038	protein_coding	LSM4 homolog, U6 small nuclear RNA and mRNA degradation associated [Source:MGI Symbol;Acc:MGI:1354692]	-	556	503	546	465	464	509	551	542	520	568	23.1745	21.1331	20.5449	19.7689	20.716	22.0712	23.6929	23.6374	23.8982	24.4007
ENSMUSG00000036295	979.538	1081.94	1064.38	1026.25	1154.58	926.44	918.494	996.408	1011.95	946.396	0.144739	0.0124099	0.693745	Lrrn3	12	41451668	41486431	-	3865	protein_coding	leucine rich repeat protein 3, neuronal [Source:MGI Symbol;Acc:MGI:106036]	-	1019	1103	1211	1037	1110	911	913	982	937	939	11.4066	12.4457	12.2378	11.8401	13.3094	10.609	10.5435	11.5016	11.5651	10.8334
ENSMUSG00000025145	2056.16	1883.34	1923.09	1825.87	1911.81	2021.69	1967.77	2128.78	2058.45	2118.56	-0.100692	0.0274422	0.845499	Lrrc45	11	120713925	120721128	+	3293	protein_coding	leucine rich repeat containing 45 [Source:MGI Symbol;Acc:MGI:2387183]	-	2139	1920	2188	1845	1838	1988	1956	2098	1906	2102	28.1029	25.4274	25.9516	24.7248	25.8666	27.1726	26.512	28.8411	27.6115	28.4637
ENSMUSG00000028703	539.275	537.538	537.023	624.456	602.251	505.423	503.009	537.776	452.514	538.206	0.161581	0.0284378	0.845499	Lrrc41	4	116075269	116097043	+	3713	protein_coding	leucine rich repeat containing 41 [Source:MGI Symbol;Acc:MGI:2441984]	-	561	548	611	631	579	497	500	530	419	534	6.53688	6.43648	6.42725	7.49949	7.22668	6.02473	6.01049	6.46172	5.38329	6.41308
ENSMUSG00000038668	540.236	525.767	454.404	564.088	481.593	809.491	610.653	548.938	549.713	545.261	-0.256364	0.0179777	0.774253	Lpar1	4	58435255	58553898	-	4289	protein_coding	lysophosphatidic acid receptor 1 [Source:MGI Symbol;Acc:MGI:108429]	-	562	536	517	570	463	796	607	541	509	541	5.66908	5.45006	4.70807	5.86471	5.00277	8.35339	6.3168	5.71003	5.66136	5.6246
ENSMUSG00000032334	102.856	67.6827	96.6817	84.1184	76.9717	82.3728	69.4152	60.8803	65.8791	61.4805	0.335452	0.0412689	0.905032	Loxl1	9	58287738	58313186	-	3297	protein_coding	lysyl oxidase-like 1 [Source:MGI Symbol;Acc:MGI:106096]	-	107	69	110	85	74	81	69	60	61	61	1.4041	0.912689	1.30311	1.1377	1.04016	1.10579	0.934103	0.823815	0.882612	0.825014
ENSMUSG00000048814	5506.18	5539.19	5787.72	5737.87	6234.71	5184.4	5204.13	5756.24	5426.93	5392.14	0.0952374	0.0392417	0.894688	Lonrf2	1	38793645	38836711	-	7506	protein_coding	LON peptidase N-terminal domain and ring finger 2 [Source:MGI Symbol;Acc:MGI:1920209]	-	5728	5647	6585	5798	5994	5098	5173	5673	5025	5350	33.0162	32.8097	34.2654	34.0877	37.0078	30.5701	30.7609	34.2138	31.9364	31.7831
ENSMUSG00000044471	25.9544	24.5227	23.731	6.9274	23.9236	15.2542	15.0903	9.13205	15.1198	9.07089	0.725663	0.0499053	0.925979	Lncpint	6	31082565	31220488	-	7378	lincRNA	long non-protein coding RNA, Trp53 induced transcript [Source:MGI Symbol;Acc:MGI:2673128]	-	27	25	27	7	23	15	15	9	14	9	0.158328	0.147773	0.142933	0.0418685	0.144469	0.0915079	0.0907439	0.0552206	0.0905208	0.0543944
ENSMUSG00000057604	74.9793	80.4345	76.4665	44.5333	60.3292	55.9322	47.2828	40.5869	61.5592	38.2993	0.471138	0.0219259	0.819599	Lmcd1	6	112273758	112330425	+	1730	protein_coding	LIM and cysteine-rich domains 1 [Source:MGI Symbol;Acc:MGI:1353635]	-	78	82	87	45	58	55	47	40	57	38	1.95066	2.0671	1.96418	1.14787	1.5537	1.43094	1.2126	1.04667	1.57177	0.979463
ENSMUSG00000021484	1873.52	1786.23	1836.07	1792.22	1808.83	1538.64	1539.21	1696.53	1762.54	1728.51	0.138632	0.00637297	0.535175	Lman2	13	55343833	55362783	-	7920	protein_coding	lectin, mannose-binding 2 [Source:MGI Symbol;Acc:MGI:1914140]	-	1949	1821	2089	1811	1739	1513	1530	1672	1632	1715	10.6468	10.0272	10.302	10.0907	10.1756	8.59844	8.62245	9.55671	9.83001	9.65583
ENSMUSG00000045083	363.361	363.917	361.238	387.934	402.541	314.237	348.082	386.59	317.516	306.395	0.166486	0.0449899	0.913621	Lingo2	4	35706647	36951747	-	8297	protein_coding	leucine rich repeat and Ig domain containing 2 [Source:MGI Symbol;Acc:MGI:2442298]	-	378	371	411	392	387	309	346	381	294	304	1.97108	1.95005	1.93477	2.08494	2.1616	1.67627	1.86131	2.07875	1.69038	1.63382
ENSMUSG00000024395	230.706	185.392	203.911	214.749	255.879	265.424	273.637	219.169	299.156	256.001	-0.268848	0.013579	0.70848	Lims2	18	31931325	31958619	+	2623	protein_coding	LIM and senescent cell antigen like domains 2 [Source:MGI Symbol;Acc:MGI:2385067]	-	240	189	232	217	246	261	272	216	277	254	3.95864	3.14236	3.45461	3.65081	4.34632	4.47866	4.62845	3.7278	5.03779	4.31803
ENSMUSG00000029199	592.145	515.958	562.512	543.306	521.119	605.084	614.677	627.067	609.112	578.521	-0.149015	0.017224	0.774253	Lias	5	65391497	65410693	+	4570	protein_coding	lipoic acid synthetase [Source:MGI Symbol;Acc:MGI:1934604]	-	616	526	640	549	501	595	611	618	564	574	5.83173	5.01952	5.46981	5.30132	5.0805	5.86012	5.96746	6.12167	5.88738	5.60075
ENSMUSG00000026890	121.12	72.5872	103.713	149.434	182.028	88.4745	65.3912	95.3792	87.4789	80.6301	0.589678	0.00432966	0.486127	Lhx6	2	36081953	36105408	-	4805	protein_coding	LIM homeobox protein 6 [Source:MGI Symbol;Acc:MGI:1306803]	Homeobox	126	74	118	151	175	87	65	94	81	80	1.13451	0.671632	0.959174	1.38679	1.68784	0.814952	0.603788	0.885588	0.804175	0.742416
ENSMUSG00000078813	210.519	248.17	235.552	216.729	210.112	166.78	194.161	198.876	211.677	190.489	0.222473	0.0244556	0.845499	Leng1	7	3660098	3665840	-	2222	protein_coding	leukocyte receptor cluster (LRC) member 1 [Source:MGI Symbol;Acc:MGI:1917007]	-	219	253	268	219	202	164	193	196	196	189	4.26415	4.96557	4.71085	4.34938	4.21301	3.32205	3.87684	3.99309	4.20795	3.79287
ENSMUSG00000026822	9.61274	48.0645	45.7041	3.95852	10.4016	1.01695	5.03009	2.02934	0	12.0945	2.54219	0.0111186	0.673429	Lcn2	2	32384633	32388252	-	2623	protein_coding	lipocalin 2 [Source:MGI Symbol;Acc:MGI:96757]	-	10	49	52	4	10	1	5	2	0	12	0.164943	0.814687	0.774308	0.067296	0.17668	0.0171596	0.0850817	0.0345167	0	0.204002
ENSMUSG00000035237	293.188	253.074	245.22	275.117	237.156	372.203	354.118	330.783	331.556	300.347	-0.37346	3.41539e-05	0.0539725	Lcat	8	105939551	105943382	-	1342	protein_coding	lecithin cholesterol acyltransferase [Source:MGI Symbol;Acc:MGI:96755]	-	305	258	279	278	228	366	352	326	307	298	9.83286	8.38417	8.12008	9.14155	7.8735	12.2754	11.7072	10.9967	10.913	9.90181
ENSMUSG00000060594	55.7539	28.4464	27.2467	35.6266	33.2851	61.0169	51.3069	48.7043	50.7593	43.3387	-0.501555	0.0259807	0.845499	Layn	9	51054640	51077094	-	2409	protein_coding	layilin [Source:MGI Symbol;Acc:MGI:2685357]	-	58	29	31	36	32	60	51	48	47	43	1.04165	0.524994	0.502613	0.659467	0.6156	1.12104	0.944927	0.90199	0.930722	0.795944
ENSMUSG00000034839	756.522	688.598	704.019	726.388	665.701	778.983	780.67	762.019	804.59	736.758	-0.124791	0.0287424	0.845499	Larp6	9	60712989	60738801	+	2440	protein_coding	La ribonucleoprotein domain family, member 6 [Source:MGI Symbol;Acc:MGI:1914807]	-	787	702	801	734	640	766	776	751	745	731	13.9546	12.547	12.8219	13.275	12.1556	14.1301	14.195	13.9331	14.5655	13.3591
ENSMUSG00000028581	504.669	438.466	418.368	508.669	483.673	544.067	544.256	469.793	562.673	546.269	-0.181023	0.0205048	0.817511	Laptm5	4	130913125	130936141	+	3788	protein_coding	lysosomal-associated protein transmembrane 5 [Source:MGI Symbol;Acc:MGI:108046]	-	525	447	476	514	465	535	541	463	521	542	5.99628	5.14624	4.90801	5.98799	5.6889	6.35696	6.37459	5.5331	6.56125	6.38028
ENSMUSG00000024903	1.92255	4.90454	9.66817	0.989629	3.12047	0	1.00602	0	1.07999	0	3.3081	0.0063619	1	Lao1	4	118961578	118968912	+	2538	protein_coding	L-amino acid oxidase 1 [Source:MGI Symbol;Acc:MGI:2140628]	-	2	5	11	1	3	0	1	0	1	0	0.0340934	0.0859154	0.169282	0.0173875	0.0547791	0	0.0175862	0	0.0187961	0
ENSMUSG00000039089	618.099	649.362	658.315	572.005	623.055	545.084	568.4	612.862	581.032	554.332	0.125786	0.0485712	0.924604	L3mbtl3	10	26274468	26375971	-	9713	protein_coding	L3MBTL3 histone methyl-lysine binding protein [Source:MGI Symbol;Acc:MGI:2143628]	-	643	662	749	578	599	536	565	604	538	550	2.86411	2.97233	3.01188	2.62604	2.85798	2.4838	2.59633	2.81502	2.64233	2.52499
ENSMUSG00000063661	33.6446	12.7518	25.4888	15.8341	24.9638	7.11864	3.01805	13.1907	21.5997	14.1103	0.939891	0.0257301	0.845499	Krt73	15	101793308	101802346	-	2168	protein_coding	keratin 73 [Source:MGI Symbol;Acc:MGI:3607712]	-	35	13	29	16	24	7	3	13	20	14	0.69846	0.261503	0.522453	0.325678	0.513024	0.145326	0.0617628	0.271445	0.440078	0.287952
ENSMUSG00000035775	6.72892	7.84727	4.39462	4.94814	8.32126	13.2203	23.1384	8.11738	9.71987	17.1339	-1.15631	0.00890266	0.628017	Krt20	11	99428403	99438150	-	1927	protein_coding	keratin 20 [Source:MGI Symbol;Acc:MGI:1914059]	-	7	8	5	5	8	13	23	8	9	17	0.157162	0.181051	0.101344	0.114503	0.192395	0.303646	0.532734	0.187934	0.222802	0.393385
ENSMUSG00000027331	10.574	23.5418	20.2153	13.8548	5.20079	23.3898	25.1504	22.3228	31.3196	17.1339	-0.690552	0.0495095	0.925979	Knstrn	2	118814003	118853957	+	5158	protein_coding	kinetochore-localized astrin/SPAG5 binding [Source:MGI Symbol;Acc:MGI:1289298]	-	11	24	23	14	5	23	25	22	29	17	0.0922665	0.202919	0.174163	0.119777	0.0449235	0.200702	0.216333	0.193081	0.26821	0.146966
ENSMUSG00000030980	438.341	411.001	406.942	435.437	436.866	464.745	477.858	491.101	439.554	470.678	-0.140269	0.0343704	0.869891	Knop1	7	118842222	118856254	-	5880	protein_coding	lysine rich nucleolar protein 1 [Source:MGI Symbol;Acc:MGI:1913606]	-	456	419	463	440	420	457	475	484	407	467	3.35521	3.10763	3.07548	3.3022	3.31022	3.4982	3.60563	3.72619	3.30199	3.54152
ENSMUSG00000085148	222.054	189.315	170.511	204.853	179.947	309.152	273.637	290.196	238.677	254.993	-0.500823	1.58943e-06	0.00541367	Mir22hg	11	75461539	75466676	+	1924	processed_transcript	Mir22 host gene (non-protein coding) [Source:MGI Symbol;Acc:MGI:1914348]	-	231	193	194	207	173	304	272	286	221	253	5.19445	4.37467	3.93827	4.7478	4.16703	7.11172	6.30999	6.72912	5.47957	5.86362
ENSMUSG00000047485	210.519	210.895	232.915	212.77	225.714	189.152	171.023	188.729	164.158	222.741	0.223277	0.0290889	0.848908	Klhl34	X	157818435	157820369	+	1935	protein_coding	kelch-like 34 [Source:MGI Symbol;Acc:MGI:2685234]	-	219	215	265	215	217	186	170	186	152	221	4.89661	4.84563	5.34901	4.90326	5.19714	4.32651	3.92132	4.3514	3.74733	5.09286
ENSMUSG00000029775	3268.33	3063.38	3535.04	3444.9	3669.68	3123.05	2947.63	3347.4	3135.2	3195.98	0.108635	0.0478823	0.921416	Klhdc10	6	30401868	30455179	+	8443	protein_coding	kelch domain containing 10 [Source:MGI Symbol;Acc:MGI:1924038]	-	3400	3123	4022	3481	3528	3071	2930	3299	2903	3171	17.4227	16.1313	18.606	18.1943	19.365	16.3715	15.4894	17.6882	16.4025	16.7475
ENSMUSG00000026494	661.356	724.891	784.88	774.879	714.588	682.372	664.978	645.332	641.512	715.592	0.128271	0.0467572	0.916309	Kif26b	1	178529125	178939200	+	14696	protein_coding	kinesin family member 26B [Source:MGI Symbol;Acc:MGI:2447076]	-	688	739	893	783	687	671	661	636	594	710	2.02545	2.193	2.37335	2.3512	2.16642	2.05508	2.00755	1.95909	1.92817	2.15432
ENSMUSG00000010021	160.533	167.735	154.691	134.59	139.381	143.39	125.752	111.614	129.598	132.032	0.237915	0.0421928	0.905032	Kif19a	11	114765388	114790739	+	4068	protein_coding	kinesin family member 19A [Source:MGI Symbol;Acc:MGI:2447024]	-	167	171	176	136	134	141	125	110	120	131	1.7761	1.83319	1.68982	1.47532	1.52654	1.56007	1.37149	1.22408	1.40721	1.43596
ENSMUSG00000060012	1081.43	1225.15	1169.85	1161.82	1060.96	1530.51	1340.02	1273.41	1235.5	1186.27	-0.204065	0.00437216	0.486127	Kif13b	14	64647265	64809617	+	13017	protein_coding	kinesin family member 13B [Source:MGI Symbol;Acc:MGI:1098265]	-	1125	1249	1331	1174	1020	1505	1332	1255	1144	1177	3.73916	4.18451	3.99371	3.98002	3.6314	5.20393	4.56728	4.36446	4.19251	4.03196
ENSMUSG00000029162	234.551	256.998	212.7	243.449	227.795	289.83	297.781	244.536	317.516	295.308	-0.298173	0.00145217	0.319532	Khk	5	30921431	30931248	+	1797	protein_coding	ketohexokinase [Source:MGI Symbol;Acc:MGI:1096353]	-	244	262	242	246	219	285	296	241	294	293	5.87455	6.35837	5.25988	6.04108	5.64783	7.13843	7.35205	6.07109	7.80474	7.2706
ENSMUSG00000028397	420.077	397.268	411.337	418.613	407.742	465.762	480.876	450.514	450.354	431.371	-0.149154	0.0238948	0.839298	Kdm4c	4	74242497	74405860	+	5823	protein_coding	lysine (K)-specific demethylase 4C [Source:MGI Symbol;Acc:MGI:1924054]	-	437	405	468	423	392	458	478	444	417	428	3.24689	3.0332	3.13912	3.20569	3.11978	3.54017	3.66392	3.4517	3.41624	3.27754
ENSMUSG00000029475	382.587	412.963	399.911	424.551	408.782	373.22	371.221	360.209	340.196	382.993	0.14944	0.0344707	0.869891	Kdm2b	5	122870665	122989823	-	10869	protein_coding	lysine (K)-specific demethylase 2B [Source:MGI Symbol;Acc:MGI:1354737]	-	398	421	455	429	393	367	369	355	315	380	1.58426	1.68922	1.63505	1.74179	1.67567	1.51979	1.51531	1.47855	1.38255	1.55899
ENSMUSG00000051648	0	0	0	0.989629	1.04016	1.01695	8.04814	0	3.23996	1.00788	-2.74726	0.0499959	1	Kctd19	8	105382807	105413502	-	3048	protein_coding	potassium channel tetramerisation domain containing 19 [Source:MGI Symbol;Acc:MGI:3045294]	-	0	0	0	1	1	1	8	0	3	1	0	0	0	0.0144781	0.0152044	0.014767	0.117149	0	0.0469532	0.0146297
ENSMUSG00000040164	55.7539	70.6254	52.7355	64.3259	36.4055	89.4915	103.62	79.1444	63.7192	55.4332	-0.483753	0.0210824	0.819153	Kcns1	2	164163619	164171113	-	2712	protein_coding	K+ voltage-gated channel, subfamily S, 1 [Source:MGI Symbol;Acc:MGI:1197019]	-	58	72	60	65	35	88	103	78	59	55	0.925275	1.15781	0.864113	1.05767	0.598086	1.46049	1.69517	1.30197	1.03782	0.904323
ENSMUSG00000016346	7064.4	7698.17	7390.88	7157	7705.49	6356.95	7013.96	7167.64	6491.8	7113.59	0.116409	0.0133645	0.708276	Kcnq2	2	181075579	181135300	-	16273	protein_coding	potassium voltage-gated channel, subfamily Q, member 2 [Source:MGI Symbol;Acc:MGI:1309503]	-	7349	7848	8409	7232	7408	6251	6972	7064	6011	7058	19.5386	21.0322	20.183	19.6118	21.0969	17.2897	19.1229	19.6508	17.6213	19.3404
ENSMUSG00000054477	290.305	352.146	328.718	340.432	353.654	393.559	420.515	347.018	353.155	441.45	-0.233206	0.00970186	0.63551	Kcnn2	18	45268860	45686024	+	7321	protein_coding	potassium intermediate/small conductance calcium-activated channel, subfamily N, member 2 [Source:MGI Symbol;Acc:MGI:2153182]	-	302	359	374	344	340	387	418	342	327	438	1.78472	2.13854	1.99531	2.07356	2.15226	2.37928	2.54842	2.11472	2.13077	2.66781
ENSMUSG00000043301	182.642	205.01	161.722	157.351	186.188	133.22	158.951	168.436	124.198	135.055	0.308719	0.0106542	0.655797	Kcnj6	16	94748636	94997701	-	7633	protein_coding	potassium inwardly-rectifying channel, subfamily J, member 6 [Source:MGI Symbol;Acc:MGI:104781]	-	190	209	184	159	179	131	158	166	115	134	1.07694	1.19411	0.941524	0.919241	1.08678	0.772471	0.923903	0.984487	0.718723	0.782817
ENSMUSG00000025221	674.814	656.228	743.57	783.786	794.681	560.339	604.617	673.742	723.591	681.325	0.171644	0.0361553	0.885095	Kcnip2	19	45791839	45816061	-	3476	protein_coding	Kv channel-interacting protein 2 [Source:MGI Symbol;Acc:MGI:2135916]	-	702	669	846	792	764	551	601	664	670	676	8.73755	8.39342	9.50604	10.0548	10.1859	7.13473	7.71719	8.6474	9.19505	8.67197
ENSMUSG00000058248	588.3	574.812	599.427	542.317	665.701	447.457	456.732	550.967	496.794	531.151	0.258224	0.00107721	0.260071	Kcnh1	1	192190774	192510159	+	7331	protein_coding	potassium voltage-gated channel, subfamily H (eag-related), member 1 [Source:MGI Symbol;Acc:MGI:1341721]	-	612	586	682	548	640	440	454	543	460	527	3.61178	3.486	3.63354	3.29872	4.04578	2.70144	2.76412	3.353	2.99332	3.20552
ENSMUSG00000018470	341.252	535.576	378.817	424.551	365.095	482.034	619.707	441.382	442.794	485.797	-0.273682	0.0262224	0.845499	Kcnab3	11	69326258	69333042	+	2865	protein_coding	potassium voltage-gated channel, shaker-related subfamily, beta member 3 [Source:MGI Symbol;Acc:MGI:1336208]	-	355	546	431	429	351	474	616	435	410	482	5.36088	8.31115	5.87573	6.60785	5.67764	7.44663	9.59667	6.87325	6.82682	7.50193
ENSMUSG00000085413	2.88382	4.90454	0	1.97926	1.04016	1.01695	0	0	0	0	2.9373	0.0427151	1	Kbtbd8os	6	95114017	95117631	-	427	antisense	kelch repeat and BTB (POZ) domain containing 8, opposite strand [Source:MGI Symbol;Acc:MGI:1919467]	-	3	5	0	2	1	1	0	0	0	0	0.303967	0.510664	0	0.206695	0.108532	0.105409	0	0	0	0
ENSMUSG00000010453	2451.25	2460.12	2533.06	2560.17	2634.72	2314.57	2314.85	2440.29	2297.13	2456.2	0.0960276	0.0184763	0.777813	Kansl3	1	36335730	36369181	-	6742	protein_coding	KAT8 regulatory NSL complex subunit 3 [Source:MGI Symbol;Acc:MGI:1918055]	-	2550	2508	2882	2587	2533	2276	2301	2405	2127	2437	16.3638	16.223	16.6961	16.9331	17.4113	15.1946	15.2332	16.1482	15.05	16.1182
ENSMUSG00000020216	13.4578	5.88545	14.0628	5.93777	9.36142	21.3559	10.0602	16.2348	23.7597	18.1418	-0.867158	0.0241355	0.840277	Jsrp1	10	80808496	80813498	-	1333	protein_coding	junctional sarcoplasmic reticulum protein 1 [Source:MGI Symbol;Acc:MGI:1916700]	-	14	6	16	6	9	21	10	16	22	18	0.454392	0.196297	0.468812	0.198632	0.312894	0.70908	0.334838	0.543359	0.78732	0.602134
ENSMUSG00000063646	332.601	279.559	302.35	302.826	306.847	324.407	325.95	342.959	384.475	360.82	-0.189103	0.0208594	0.819153	Jakmip1	5	37028335	37150607	+	8586	protein_coding	janus kinase and microtubule interacting protein 1 [Source:MGI Symbol;Acc:MGI:1923321]	-	346	285	344	306	295	319	324	338	356	358	1.74348	1.44759	1.56486	1.57274	1.59227	1.67227	1.6843	1.78206	1.97796	1.85927
ENSMUSG00000027332	2479.12	2543.5	2484.72	2280.1	2384.04	2187.46	2322.89	2347.95	2261.49	2316.1	0.0901036	0.0381843	0.889755	Ivd	2	118861954	118882909	+	5505	protein_coding	isovaleryl coenzyme A dehydrogenase [Source:MGI Symbol;Acc:MGI:1929242]	-	2579	2593	2827	2304	2292	2151	2309	2314	2094	2298	20.2687	20.5418	20.0575	18.4694	19.2949	17.5869	18.7211	19.0284	18.1459	18.6142
ENSMUSG00000031239	873.798	603.259	547.57	755.087	650.099	774.915	815.88	812.752	863.989	743.813	-0.22623	0.0315629	0.856052	Itm2a	X	107397099	107403376	-	1744	protein_coding	integral membrane protein 2A [Source:MGI Symbol;Acc:MGI:107706]	-	909	615	623	763	625	762	811	801	800	738	22.5502	15.3788	13.9524	19.3066	16.6081	19.6659	20.7558	20.7914	21.8828	18.8695
ENSMUSG00000006522	5827.24	5701.04	6375.72	4974.86	6011.07	4495.93	4564.3	5567.51	5573.81	5183.51	0.186712	0.0143599	0.718669	Itih3	14	30908572	30923760	-	3638	protein_coding	inter-alpha trypsin inhibitor, heavy chain 3 [Source:MGI Symbol;Acc:MGI:96620]	-	6062	5812	7254	5027	5779	4421	4537	5487	5161	5143	72.0918	69.6716	77.8796	60.9781	73.6165	54.697	55.6635	68.2762	67.6753	63.0383
ENSMUSG00000020758	376.819	297.215	381.453	381.007	319.328	665.084	510.051	404.854	372.595	413.229	-0.430007	0.00198853	0.382296	Itgb4	11	115974709	116008412	+	7015	protein_coding	integrin beta 4 [Source:MGI Symbol;Acc:MGI:96613]	-	392	303	434	385	307	654	507	399	345	410	2.41764	1.88368	2.41641	2.42192	2.02813	4.1962	3.22586	2.57479	2.34612	2.60619
ENSMUSG00000030830	12.4966	13.7327	11.426	12.8652	4.16063	3.05085	6.03611	2.02934	5.39993	6.04726	1.28261	0.0119925	1	Itgal	7	127296260	127335138	+	6569	protein_coding	integrin alpha L [Source:MGI Symbol;Acc:MGI:96606]	-	13	14	13	13	4	3	6	2	5	6	0.0856203	0.0929441	0.0772953	0.0873316	0.0282193	0.0205555	0.0407677	0.0137825	0.0363103	0.0407289
ENSMUSG00000025348	414.309	469.855	406.942	449.291	340.132	469.83	515.081	455.588	490.314	503.938	-0.226263	0.00808756	0.60341	Itga7	10	128933818	128958282	+	8092	protein_coding	integrin alpha 7 [Source:MGI Symbol;Acc:MGI:102700]	-	431	479	463	454	327	462	512	449	454	500	2.30438	2.5815	2.23478	2.47587	1.87274	2.56976	2.82409	2.51182	2.67645	2.75527
ENSMUSG00000031737	60.5602	51.0073	65.9194	59.3777	47.8473	87.4576	61.3671	73.0564	86.3989	75.5908	-0.426148	0.011201	0.674665	Irx5	8	92357625	92376286	+	3127	protein_coding	Iroquois homeobox 5 [Source:MGI Symbol;Acc:MGI:1859086]	Homeobox	63	52	75	60	46	86	61	72	80	75	0.871656	0.725218	0.93679	0.846742	0.681735	1.23787	0.870696	1.04232	1.22045	1.06951
ENSMUSG00000001504	75.9406	63.7591	64.1615	61.357	75.9315	275.593	117.704	76.1004	76.679	65.512	-0.842568	0.0402258	0.900166	Irx2	13	72628820	72634198	+	3282	protein_coding	Iroquois homeobox 2 [Source:MGI Symbol;Acc:MGI:1197526]	Homeobox	79	65	73	62	73	271	117	75	71	65	1.04141	0.863709	0.868747	0.833644	1.03079	3.71652	1.59115	1.03448	1.032	0.883132
ENSMUSG00000041037	2075.39	2060.89	2032.07	2056.45	2155.21	1790.85	1943.63	1956.29	1857.58	2027.85	0.115872	0.00996135	0.63551	Irgq	7	24530689	24538600	+	6083	protein_coding	immunity-related GTPase family, Q [Source:MGI Symbol;Acc:MGI:2667176]	-	2159	2101	2312	2078	2072	1761	1932	1928	1720	2012	15.3556	15.0626	14.845	15.0749	15.7855	13.0301	14.176	14.3478	13.4887	14.7489
ENSMUSG00000025498	53.8313	49.0454	45.7041	37.6059	31.2047	70.1694	70.4212	50.7336	64.7992	51.4017	-0.496407	0.0122507	0.693529	Irf7	7	141262706	141266481	-	3776	protein_coding	interferon regulatory factor 7 [Source:MGI Symbol;Acc:MGI:1859212]	IRF	56	50	52	38	30	69	70	50	60	51	0.641636	0.577472	0.537874	0.444098	0.368192	0.822476	0.827429	0.599426	0.758016	0.602267
ENSMUSG00000040797	4533.37	4813.32	4982.62	4781.89	5027.08	4233.56	4292.68	4782.15	4035.91	4850.91	0.120964	0.0329008	0.860175	Iqsec3	6	121372933	121473678	-	13577	protein_coding	IQ motif and Sec7 domain 3 [Source:MGI Symbol;Acc:MGI:2677208]	-	4716	4907	5669	4832	4833	4163	4267	4713	3737	4813	15.028	15.7618	16.3084	15.7055	16.4967	13.8009	14.0276	15.7142	13.1304	15.8075
ENSMUSG00000045294	1709.14	1545.91	1472.2	1854.56	1551.92	1717.63	1814.86	1909.61	2081.13	1854.49	-0.205346	0.00349038	0.472501	Insig1	5	28071363	28078662	+	3093	protein_coding	insulin induced gene 1 [Source:MGI Symbol;Acc:MGI:1916289]	-	1778	1576	1675	1874	1492	1689	1804	1882	1927	1840	24.8705	22.2213	21.1516	26.7373	22.355	24.5785	26.0328	27.5446	29.7208	26.527
ENSMUSG00000090461	6.72892	6.86636	1.75785	1.97926	2.08032	15.2542	20.1204	2.02934	3.23996	8.06301	-1.3317	0.0494308	1	Iltifb	10	118289629	118295038	-	1146	protein_coding	interleukin 10-related T cell-derived inducible factor beta [Source:MGI Symbol;Acc:MGI:2151139]	-	7	7	2	2	2	15	20	2	3	8	0.264269	0.266383	0.0681639	0.0770146	0.0808781	0.589132	0.778951	0.0790028	0.124881	0.311283
ENSMUSG00000024810	1175.64	1027.01	998.459	1154.9	985.03	1269.15	1334.99	1284.58	1306.78	1129.83	-0.243966	0.000309636	0.173106	Il33	19	29925114	29960718	+	2886	protein_coding	interleukin 33 [Source:MGI Symbol;Acc:MGI:1924375]	-	1223	1047	1136	1167	947	1248	1327	1266	1210	1121	18.3342	15.8213	15.3741	17.8444	15.2068	19.4636	20.5229	19.858	20.0008	17.3205
ENSMUSG00000023206	98.0499	93.1863	103.713	99.9525	108.176	122.034	111.668	136.981	101.519	132.032	-0.265784	0.0390259	0.894688	Il15ra	2	11705290	11734317	+	4446	protein_coding	interleukin 15 receptor, alpha chain [Source:MGI Symbol;Acc:MGI:104644]	-	102	95	118	101	104	120	111	135	94	131	0.992575	0.931852	1.03662	1.00249	1.08405	1.21484	1.11434	1.37455	1.0086	1.31387
ENSMUSG00000073889	579.648	605.221	572.18	512.628	575.207	526.779	499.991	457.617	543.233	529.135	0.154533	0.0280434	0.845499	Il11ra1	4	41699989	41769474	+	4471	protein_coding	interleukin 11 receptor, alpha chain 1 [Source:MGI Symbol;Acc:MGI:107426]	-	603	617	651	518	553	518	497	451	503	525	5.83506	6.01829	5.68703	5.11273	5.73199	5.21472	4.96154	4.56635	5.36688	5.23607
ENSMUSG00000004221	682.504	686.636	758.512	780.817	770.757	637.627	732.381	662.581	646.912	673.262	0.133669	0.0400963	0.900166	Ikbkg	X	74393290	74453854	+	8110	protein_coding	inhibitor of kappaB kinase gamma [Source:MGI Symbol;Acc:MGI:1338074]	-	710	700	863	789	741	627	728	653	599	668	3.78765	3.76418	4.15622	4.29323	4.23431	3.47979	4.00659	3.64493	3.52342	3.67288
ENSMUSG00000076609	5.76764	14.7136	2.63677	8.90666	5.20079	27.4576	21.1264	3.04402	34.5596	57.449	-1.95299	0.000473845	0.211201	Igkc	6	70726435	70726966	+	532	IG_C_gene	immunoglobulin kappa constant [Source:MGI Symbol;Acc:MGI:96495]	-	6	15	3	9	5	27	21	3	32	57	0.487946	1.22962	0.220251	0.746549	0.435556	2.28433	1.76186	0.255274	2.86944	4.77765
ENSMUSG00000076617	177.836	144.194	124.807	171.206	133.14	149.491	180.077	146.113	242.997	247.938	-0.363582	0.0274747	0.845499	Ighm	12	113418558	113422730	-	1886	IG_C_gene	immunoglobulin heavy constant mu [Source:MGI Symbol;Acc:MGI:96448]	-	185	147	142	173	128	147	179	144	225	246	4.24387	3.39914	2.94073	4.04792	3.14524	3.50818	4.2362	3.45635	5.69115	5.81626
ENSMUSG00000036256	528.701	816.116	864.862	414.654	654.259	474.915	487.919	325.71	373.675	399.119	0.669653	0.00249689	0.425523	Igfbp7	5	77349240	77408041	-	1209	protein_coding	insulin-like growth factor binding protein 7 [Source:MGI Symbol;Acc:MGI:1352480]	-	550	832	984	419	629	467	485	321	346	396	19.682	30.0117	31.7891	15.2938	24.1107	17.3859	17.9052	12.0192	13.6524	14.6056
ENSMUSG00000020009	311.453	322.719	321.686	306.785	320.369	282.712	279.673	264.829	277.556	282.205	0.190847	0.0119231	0.684445	Ifngr1	10	19591949	19610229	+	2847	protein_coding	interferon gamma receptor 1 [Source:MGI Symbol;Acc:MGI:107655]	-	324	329	366	310	308	278	278	261	257	280	4.92368	5.03966	5.02114	4.80509	5.01359	4.39504	4.35835	4.15002	4.3063	4.38552
ENSMUSG00000074896	154.765	102.015	104.592	134.59	165.385	209.491	189.131	139.01	190.078	154.205	-0.417296	0.00788171	0.598481	Ifit3	19	34583531	34588731	+	1745	protein_coding	interferon-induced protein with tetratricopeptide repeats 3 [Source:MGI Symbol;Acc:MGI:1101055]	-	161	104	119	136	159	206	188	137	176	153	3.99175	2.59915	2.66355	3.43931	4.22267	5.31346	4.80869	3.55404	4.81145	3.90973
ENSMUSG00000089762	219.17	205.01	239.946	198.915	212.192	277.627	216.294	258.741	235.437	243.906	-0.194886	0.0452947	0.915163	Ier5l	2	30471537	30474219	-	2683	protein_coding	immediate early response 5-like [Source:MGI Symbol;Acc:MGI:1919750]	-	228	209	273	201	204	273	215	255	218	242	3.6766	3.39718	3.97421	3.306	3.52367	4.57981	3.5767	4.30246	3.8761	4.02203
ENSMUSG00000053560	109.585	129.48	63.2826	79.1703	69.6906	127.119	158.951	106.541	138.238	95.7483	-0.474258	0.0177459	0.774253	Ier2	8	84661331	84662852	-	1522	protein_coding	immediate early response 2 [Source:MGI Symbol;Acc:MGI:104815]	-	114	132	72	80	67	125	158	105	128	95	3.24058	3.78227	1.84768	2.31955	2.04007	3.69659	4.63348	3.123	4.01194	2.7833
ENSMUSG00000007872	386.432	319.776	335.749	347.36	306.847	531.864	381.281	348.033	422.275	463.623	-0.339697	0.00200132	0.382296	Id3	4	136143497	136145755	+	1791	protein_coding	inhibitor of DNA binding 3 [Source:MGI Symbol;Acc:MGI:96398]	bHLH	402	326	382	351	295	523	379	343	391	460	9.71098	7.93807	8.33061	8.64847	7.63329	13.1435	9.44514	8.66954	10.4145	11.4528
ENSMUSG00000062995	696.923	648.381	631.068	670.968	675.062	730.169	743.447	766.078	731.151	726.679	-0.155033	0.00498316	0.506563	Ica1	6	8630527	8778488	-	3243	protein_coding	islet cell autoantigen 1 [Source:MGI Symbol;Acc:MGI:96391]	-	725	661	718	678	649	718	739	755	677	721	9.67216	8.88889	8.64742	9.22593	9.27434	9.96514	10.171	10.539	9.95865	9.91377
ENSMUSG00000032115	3377.92	3400.81	3513.06	3299.42	3682.16	2825.08	2815.84	3389.01	3281	3312.89	0.144832	0.018419	0.777813	Hyou1	9	44379490	44392369	+	7230	protein_coding	hypoxia up-regulated 1 [Source:MGI Symbol;Acc:MGI:108030]	-	3514	3467	3997	3334	3540	2778	2799	3340	3038	3287	21.0279	20.9126	21.5926	20.3496	22.6908	17.2942	17.2794	20.9125	20.0451	20.2727
ENSMUSG00000035878	122.082	113.785	103.713	130.631	113.377	117.966	95.5717	68.9977	72.3591	101.796	0.351401	0.0240913	0.840277	Hykk	9	54917283	54949924	+	8936	protein_coding	hydroxylysine kinase 1 [Source:MGI Symbol;Acc:MGI:2443139]	-	127	116	118	132	109	116	95	68	67	101	0.614884	0.566119	0.51576	0.651866	0.565287	0.58428	0.47451	0.344479	0.357677	0.503998
ENSMUSG00000025261	7510.43	8028.74	8452.62	8588.99	8713.4	7988.13	7773.5	7850.52	6948.63	7656.84	0.1116	0.0327991	0.860175	Huwe1	X	151800807	151935417	+	23507	protein_coding	HECT, UBA and WWE domain containing 1 [Source:MGI Symbol;Acc:MGI:1926884]	-	7813	8185	9617	8679	8377	7855	7727	7737	6434	7597	14.3798	15.185	15.9791	16.293	16.5149	15.0402	14.6716	14.8995	13.057	14.411
ENSMUSG00000049511	291.266	249.151	362.117	328.557	352.614	202.373	226.354	283.094	304.556	278.174	0.291798	0.0218307	0.819599	Htr1b	9	81628291	81633828	-	4724	protein_coding	5-hydroxytryptamine (serotonin) receptor 1B [Source:MGI Symbol;Acc:MGI:96274]	-	303	254	412	332	339	199	225	279	282	276	2.77501	2.34486	3.4064	3.10139	3.32564	1.89605	2.12587	2.67357	2.84773	2.60525
ENSMUSG00000017832	0.961274	0	0	0	0	0	3.01805	3.04402	4.31994	1.00788	-3.09484	0.029345	1	Hspb9	11	100713850	100714575	+	726	protein_coding	heat shock protein, alpha-crystallin-related, B9 [Source:MGI Symbol;Acc:MGI:1922732]	-	1	0	0	0	0	0	3	3	4	1	0.0595931	0	0	0	0	0	0.184438	0.18706	0.262834	0.0614206
ENSMUSG00000026864	6605.87	7379.38	7042.82	6300.97	7340.39	5125.42	5794.66	6387.36	6816.87	6303.26	0.18833	0.00890268	0.628017	Hspa5	2	34771970	34777547	+	4229	protein_coding	heat shock protein 5 [Source:MGI Symbol;Acc:MGI:95835]	-	6872	7523	8013	6367	7057	5040	5760	6295	6312	6254	70.3037	77.5794	74.0059	66.4393	77.3335	53.6412	60.7924	67.3838	71.2014	65.9433
ENSMUSG00000020048	5398.51	5848.18	5946.81	5680.47	6197.26	4881.35	5175.96	5534.02	5601.89	5168.39	0.141183	0.00533353	0.509411	Hsp90b1	10	86690209	86705509	-	4032	protein_coding	heat shock protein 90, beta (Grp94), member 1 [Source:MGI Symbol;Acc:MGI:98817]	-	5616	5962	6766	5740	5958	4800	5145	5454	5187	5128	60.2614	64.4858	65.5421	62.823	68.4802	53.583	56.9547	61.2339	61.3698	56.7124
ENSMUSG00000026675	355.671	355.089	296.198	439.395	325.569	409.83	422.527	388.619	430.914	414.237	-0.2225	0.0204088	0.817511	Hsd17b7	1	169949535	169969241	-	5104	protein_coding	hydroxysteroid (17-beta) dehydrogenase 7 [Source:MGI Symbol;Acc:MGI:1330808]	-	370	362	337	444	313	403	420	383	399	411	3.13634	3.09308	2.57886	3.83884	2.84197	3.55386	3.67285	3.39692	3.72925	3.59072
ENSMUSG00000027195	1355.4	1307.55	1206.76	1356.78	1317.88	1362.71	1375.23	1426.63	1418.02	1400.95	-0.0942789	0.0485956	0.924604	Hsd17b12	2	94032689	94157964	-	2407	protein_coding	hydroxysteroid (17-beta) dehydrogenase 12 [Source:MGI Symbol;Acc:MGI:1926967]	-	1410	1333	1373	1371	1267	1340	1367	1406	1313	1390	25.344	24.1517	22.2794	25.1356	24.3942	25.0573	25.3488	26.4427	26.0224	25.7507
ENSMUSG00000016194	182.642	227.571	185.453	178.133	144.582	259.322	299.793	162.348	253.797	252.977	-0.418643	0.00522265	0.508839	Hsd11b1	1	193221634	193264075	-	4251	protein_coding	hydroxysteroid 11-beta dehydrogenase 1 [Source:MGI Symbol;Acc:MGI:103562]	-	190	232	211	180	139	255	298	160	235	251	1.93373	2.38007	1.93865	1.86857	1.51534	2.69995	3.12889	1.70383	2.63716	2.63289
ENSMUSG00000044499	233.59	217.762	196.879	198.915	218.433	169.83	200.198	193.802	188.998	165.292	0.214258	0.0320406	0.858184	Hs3st5	10	36506814	36834397	+	4340	protein_coding	heparan sulfate (glucosamine) 3-O-sulfotransferase 5 [Source:MGI Symbol;Acc:MGI:2441996]	-	243	222	224	201	210	167	199	191	175	164	2.42242	2.23078	2.01589	2.04378	2.24241	1.73194	2.04658	1.99224	1.92357	1.68502
ENSMUSG00000051022	254.738	315.853	226.763	218.708	239.236	371.186	353.112	253.668	264.597	281.198	-0.280363	0.03028	0.856052	Hs3st1	5	39613935	39755475	-	2230	protein_coding	heparan sulfate (glucosamine) 3-O-sulfotransferase 1 [Source:MGI Symbol;Acc:MGI:1201606]	-	265	322	258	221	230	365	351	250	245	279	5.14131	6.29715	4.51881	4.37336	4.77978	7.36705	7.02533	5.07496	5.24107	5.57892
ENSMUSG00000046093	5555.2	5417.56	5907.25	6161.43	6438.58	4817.28	5162.88	5746.09	5516.57	5209.71	0.15629	0.00897524	0.628017	Hpcal4	4	123183227	123194701	+	5339	protein_coding	hippocalcin-like 4 [Source:MGI Symbol;Acc:MGI:2157521]	-	5779	5523	6721	6226	6190	4737	5132	5663	5108	5169	46.8301	45.1137	49.168	51.4608	53.7299	39.9346	42.9034	48.0158	45.6404	43.1715
ENSMUSG00000029844	2.88382	2.94273	5.27355	3.95852	1.04016	8.13559	2.01204	6.08803	14.0398	9.07089	-1.26746	0.0417717	1	Hoxa1	6	52155590	52158317	-	2251	protein_coding	homeobox A1 [Source:MGI Symbol;Acc:MGI:96170]	Homeobox	3	3	6	4	1	8	2	6	13	9	0.0576605	0.0581217	0.104108	0.0784173	0.0205878	0.159963	0.0396569	0.120663	0.275503	0.178286
ENSMUSG00000059325	83.6308	79.4536	84.3768	137.558	81.1323	206.441	134.806	113.643	90.7188	94.7404	-0.459113	0.0392102	0.894688	Hopx	5	77086988	77115121	-	1516	protein_coding	HOP homeobox [Source:MGI Symbol;Acc:MGI:1916782]	Homeobox	87	81	96	139	78	203	134	112	84	94	2.48286	2.33012	2.47332	4.04616	2.38441	6.02702	3.94521	3.34438	2.64325	2.7649
ENSMUSG00000029328	3732.63	3072.21	3043.72	3629.96	3430.44	3615.25	3746.41	3793.86	3693.55	3647.51	-0.129669	0.029438	0.851449	Hnrnpdl	5	100033577	100039664	-	4818	protein_coding	heterogeneous nuclear ribonucleoprotein D-like [Source:MGI Symbol;Acc:MGI:1355299]	-	3883	3132	3463	3668	3298	3555	3724	3739	3420	3619	34.8685	28.3497	28.0734	33.5962	31.7226	33.2108	34.4991	35.1306	33.8624	33.4944
ENSMUSG00000027875	287.421	273.674	356.843	217.718	346.373	253.22	205.228	200.905	146.878	151.182	0.630133	6.62319e-05	0.0822363	Hmgcs2	3	98280435	98310738	+	3290	protein_coding	3-hydroxy-3-methylglutaryl-Coenzyme A synthase 2 [Source:MGI Symbol;Acc:MGI:101939]	-	299	279	406	220	333	249	204	198	136	150	3.93195	3.69829	4.81991	2.9509	4.69066	3.40651	2.76757	2.72437	1.97198	2.03304
ENSMUSG00000093930	3150.09	2927.03	2996.25	3615.11	3183.92	3481.01	3725.28	3643.69	4014.31	3572.92	-0.216146	0.000395791	0.196572	Hmgcs1	13	119690379	119708260	+	4594	protein_coding	3-hydroxy-3-methylglutaryl-Coenzyme A synthase 1 [Source:MGI Symbol;Acc:MGI:107592]	-	3277	2984	3409	3653	3061	3423	3703	3591	3717	3545	30.8616	28.327	28.9831	35.0902	30.8786	33.5368	35.9772	35.3852	38.5976	34.4093
ENSMUSG00000021670	1562.07	1408.58	1641.83	1854.56	1637.21	1709.49	1759.53	1882.22	1979.61	1968.38	-0.198362	0.0051526	0.508839	Hmgcr	13	96648967	96670936	-	7275	protein_coding	3-hydroxy-3-methylglutaryl-Coenzyme A reductase [Source:MGI Symbol;Acc:MGI:96159]	-	1625	1436	1868	1874	1574	1681	1749	1855	1833	1953	9.66391	8.60824	10.0289	11.3675	10.0267	10.4002	10.7305	11.5427	12.0196	11.9707
ENSMUSG00000114456	0	1.96182	0	0	0	2.0339	8.04814	5.07336	4.31994	3.02363	-3.50496	0.00270024	1	Hist1h2bh	13	23541714	23543392	-	1679	protein_coding	histone cluster 1, H2bh [Source:MGI Symbol;Acc:MGI:2448387]	-	0	2	0	0	0	2	8	5	4	3	0	0.0519484	0	0	0	0.0536149	0.212669	0.134808	0.11365	0.0796748
ENSMUSG00000020267	2250.34	2032.44	2119.97	1968.37	2058.47	2112.2	2244.43	2270.84	2476.41	2233.45	-0.119991	0.0244337	0.845499	Hint1	11	54866383	54870501	+	872	protein_coding	histidine triad nucleotide binding protein 1 [Source:MGI Symbol;Acc:MGI:1321133]	-	2341	2072	2412	1989	1979	2077	2231	2238	2293	2216	116.15	103.625	108.036	100.657	105.176	107.208	114.195	116.183	125.443	113.319
ENSMUSG00000064325	140.346	146.155	131.839	149.434	144.582	303.051	181.083	157.274	156.598	130.016	-0.382272	0.0370855	0.886737	Hhip	8	79965851	80058006	-	9076	protein_coding	Hedgehog-interacting protein [Source:MGI Symbol;Acc:MGI:1341847]	-	146	149	150	151	139	298	180	155	145	129	0.695971	0.715953	0.645514	0.734193	0.70975	1.47784	0.885203	0.773098	0.762136	0.633791
ENSMUSG00000032523	152.843	199.124	123.928	128.652	130.02	231.864	202.21	152.201	200.877	150.174	-0.351847	0.0251376	0.845499	Hhatl	9	121784016	121792507	-	2625	protein_coding	hedgehog acyltransferase-like [Source:MGI Symbol;Acc:MGI:1922020]	-	159	203	141	130	125	228	201	150	186	149	2.6206	3.37256	2.09797	2.18545	2.20682	3.90941	3.41768	2.58678	3.3802	2.53109
ENSMUSG00000022821	0	0	1.75785	0	1.04016	3.05085	1.00602	2.02934	4.31994	4.03151	-2.32705	0.0481559	1	Hgd	16	37580153	37632020	+	2615	protein_coding	homogentisate 1, 2-dioxygenase [Source:MGI Symbol;Acc:MGI:96078]	-	0	0	2	0	1	3	1	2	4	4	0	0	0.0298722	0	0.017722	0.0516363	0.0170684	0.0346223	0.0729705	0.0682086
ENSMUSG00000038403	37.4897	28.4464	19.3363	14.8444	37.4457	20.339	20.1204	16.2348	14.0398	17.1339	0.640942	0.0412846	0.905032	Hfe2	3	96525172	96529210	+	2028	protein_coding	hemochromatosis type 2 (juvenile) [Source:MGI Symbol;Acc:MGI:1916835]	-	39	29	22	15	36	20	20	16	13	17	0.832011	0.623624	0.423705	0.326401	0.822659	0.443882	0.440176	0.357149	0.305798	0.373793
ENSMUSG00000031209	329.717	393.344	477.256	258.293	391.099	262.373	297.781	275.991	231.117	207.623	0.537535	0.000173529	0.146796	Heph	X	96455359	96574485	+	7662	protein_coding	hephaestin [Source:MGI Symbol;Acc:MGI:1332240]	-	343	401	543	261	376	258	296	272	214	206	1.9368	2.28242	2.768	1.50323	2.27421	1.5156	1.72431	1.60703	1.33239	1.19888
ENSMUSG00000042744	6798.13	7477.47	7209.82	7125.33	7149.01	6433.22	6887.2	6732.35	6111.64	7084.37	0.104933	0.0241695	0.840277	Hectd4	5	121220219	121368577	+	16443	protein_coding	HECT domain E3 ubiquitin protein ligase 4 [Source:MGI Symbol;Acc:MGI:3647820]	-	7072	7623	8203	7200	6873	6326	6846	6635	5659	7029	18.6077	20.218	19.485	19.3232	19.3709	17.3163	18.5832	18.2666	16.4179	19.0618
ENSMUSG00000032360	127.849	134.384	184.574	191.988	201.791	104.746	115.692	96.3939	138.238	161.26	0.447694	0.00750246	0.587456	Hcrtr2	9	76225880	76323856	-	6162	protein_coding	hypocretin (orexin) receptor 2 [Source:MGI Symbol;Acc:MGI:2680765]	-	133	137	210	194	194	103	115	95	128	160	0.933819	0.969598	1.33109	1.38934	1.45903	0.752353	0.832992	0.69791	0.99094	1.15784
ENSMUSG00000020331	3291.4	3760.8	3045.47	3102.49	2787.62	3471.86	3563.31	3425.53	3648.19	3544.7	-0.142903	0.0334164	0.860175	Hcn2	10	79716634	79736108	+	3195	protein_coding	hyperpolarization-activated, cyclic nucleotide-gated K+ 2 [Source:MGI Symbol;Acc:MGI:1298210]	-	3424	3834	3465	3135	2680	3414	3542	3376	3378	3517	46.3656	52.3328	42.3586	43.3006	38.8731	48.0948	49.4814	47.8331	50.4368	49.0854
ENSMUSG00000031386	2867.48	2681.8	2746.64	2828.36	2739.78	2613.56	2637.78	2756.86	2436.45	2538.84	0.0944875	0.0290589	0.848908	Hcfc1	X	73942792	73966357	-	8360	protein_coding	host cell factor C1 [Source:MGI Symbol;Acc:MGI:105942]	-	2983	2734	3125	2858	2634	2570	2622	2717	2256	2519	15.4376	14.2622	14.6	15.0863	14.6014	13.8367	13.9988	14.7123	12.8734	13.4361
ENSMUSG00000052305	1010.3	1603.79	511.534	733.315	976.708	2564.74	2488.89	740.711	2459.13	986.711	-0.934258	0.0346735	0.870997	Hbb-bs	7	103826534	103828096	-	768	protein_coding	hemoglobin, beta adult s chain [Source:MGI Symbol;Acc:MGI:5474852]	-	1051	1635	582	741	939	2522	2474	730	2277	979	59.2071	92.8431	29.5986	42.5779	56.6617	147.805	143.782	43.0288	141.436	56.8424
ENSMUSG00000069917	58.6377	59.8354	20.2153	23.7511	49.9276	142.373	145.873	35.5135	153.358	39.3072	-1.28274	0.0168896	0.774253	Hba-a2	11	32296489	32297298	+	667	protein_coding	hemoglobin alpha, adult chain 2 [Source:MGI Symbol;Acc:MGI:96016]	-	61	61	23	24	48	140	145	35	142	39	3.95673	3.98838	1.34682	1.58786	3.33504	9.44731	9.70302	2.37542	10.156	2.60729
ENSMUSG00000069919	851.689	1246.73	399.911	582.891	732.271	2021.69	2101.57	592.569	1860.82	791.183	-0.950179	0.0314439	0.856052	Hba-a1	11	32283511	32284465	+	812	protein_coding	hemoglobin alpha, adult chain 1 [Source:MGI Symbol;Acc:MGI:96015]	-	886	1271	455	589	704	1988	2089	584	1723	785	47.2074	68.2625	21.8859	32.0101	40.1793	110.196	114.828	32.5577	101.225	43.1086
ENSMUSG00000035439	239.357	299.177	220.61	251.366	248.598	280.678	311.866	303.387	305.636	298.332	-0.253849	0.00587708	0.529976	Haus8	8	71248561	71272934	-	5278	protein_coding	4HAUS augmin-like complex, subunit 8 [Source:MGI Symbol;Acc:MGI:1923728]	-	249	305	251	254	239	276	310	299	283	296	2.04109	2.52013	1.85743	2.12369	2.09852	2.35367	2.62154	2.56448	2.55786	2.50077
ENSMUSG00000038047	133.617	148.117	117.776	137.558	141.461	193.22	158.951	144.083	153.358	154.205	-0.246778	0.0365506	0.885095	Haus6	4	86578855	86612055	-	6459	protein_coding	HAUS augmin-like complex, subunit 6 [Source:MGI Symbol;Acc:MGI:1923389]	-	139	151	134	139	136	190	158	142	142	153	0.931069	1.01954	0.810305	0.94968	0.975796	1.32402	1.09183	0.995223	1.04877	1.05627
ENSMUSG00000001380	1413.07	1372.29	1539	1467.62	1396.93	1462.37	1571.4	1514.91	1631.86	1597.48	-0.112912	0.0255783	0.845499	Hars	18	36766530	36783205	-	1987	protein_coding	histidyl-tRNA synthetase [Source:MGI Symbol;Acc:MGI:108087]	-	1470	1399	1751	1483	1343	1438	1562	1493	1511	1585	32.0075	30.7053	34.4189	32.936	31.323	32.5737	35.0871	34.0141	36.2765	35.5699
ENSMUSG00000000673	3.84509	2.94273	4.39462	5.93777	4.16063	10.1695	8.04814	6.08803	11.8798	7.05514	-1.01953	0.0458064	1	Haao	17	83831356	83846790	-	1222	protein_coding	3-hydroxyanthranilate 3,4-dioxygenase [Source:MGI Symbol;Acc:MGI:1349444]	-	4	3	5	6	4	10	8	6	11	7	0.141619	0.107064	0.159811	0.216674	0.151696	0.368328	0.292202	0.222268	0.429418	0.255433
ENSMUSG00000037894	1549.57	1464.5	1440.56	1552.73	1518.63	1623.05	1570.39	1628.55	1706.38	1624.7	-0.11559	0.00935721	0.628017	H2afz	3	137864487	137866922	+	1776	protein_coding	H2A histone family, member Z [Source:MGI Symbol;Acc:MGI:1888388]	-	1612	1493	1639	1569	1460	1596	1561	1605	1580	1612	39.2694	36.6615	36.045	38.9859	38.0974	40.4479	39.2306	40.91	42.4398	40.4737
ENSMUSG00000049932	495.056	553.232	586.243	484.918	527.36	488.135	443.654	459.647	473.034	521.072	0.150795	0.0438911	0.909409	H2afx	9	44334694	44336077	+	1384	protein_coding	H2A histone family, member X [Source:MGI Symbol;Acc:MGI:102688]	-	515	564	667	490	507	480	441	453	438	517	16.0992	17.772	18.8234	15.6238	16.9769	15.6103	14.2222	14.817	15.0972	16.6573
ENSMUSG00000035929	110.546	100.053	88.7714	108.859	74.8914	125.085	126.758	107.555	127.438	117.922	-0.322829	0.0174425	0.774253	H2-Q4	17	35379617	35385290	+	2596	protein_coding	histocompatibility 2, Q region locus 4 [Source:MGI Symbol;Acc:MGI:95933]	-	115	102	101	110	72	123	126	106	118	117	1.91657	1.71352	1.51959	1.86989	1.28533	2.13258	2.16636	1.84841	2.16838	2.0097
ENSMUSG00000037649	121.12	102.015	94.045	116.776	106.096	139.322	126.758	129.878	137.158	112.882	-0.259329	0.0378618	0.887644	H2-DMa	17	34135182	34139101	+	1641	protein_coding	histocompatibility 2, class II, locus DMa [Source:MGI Symbol;Acc:MGI:95921]	-	126	104	107	118	102	137	126	128	127	112	3.32196	2.76387	2.54674	3.17323	2.88056	3.75766	3.4271	3.53101	3.69194	3.04341
ENSMUSG00000073406	42.296	34.3318	38.6727	33.6474	28.0843	60	51.3069	52.763	36.7195	52.4096	-0.514532	0.0127175	0.701807	H2-Bl	17	36080115	36084223	-	1682	polymorphic_pseudogene	histocompatibility 2, blastocyst [Source:MGI Symbol;Acc:MGI:892004]	-	44	35	44	34	27	59	51	52	34	52	1.13177	0.907476	1.02173	0.892032	0.743915	1.57882	1.35335	1.39951	0.964299	1.37857
ENSMUSG00000019188	2184.01	2264.92	2368.7	2123.74	2449.57	1977.96	1786.69	2096.31	2138.37	2144.76	0.167361	0.00593306	0.529976	H13	2	152669461	152708670	+	8884	protein_coding	histocompatibility 13 [Source:MGI Symbol;Acc:MGI:95886]	-	2272	2309	2695	2146	2355	1945	1776	2066	1980	2128	11.0645	11.3347	11.8484	10.6598	12.2848	9.8541	8.92276	10.5274	10.632	10.681
ENSMUSG00000058135	3671.1	4129.63	3853.21	3456.77	3828.82	3240	3226.3	3436.69	3472.16	3298.78	0.183921	0.000283594	0.173106	Gstm1	3	108012255	108017973	-	1473	protein_coding	glutathione S-transferase, mu 1 [Source:MGI Symbol;Acc:MGI:95860]	-	3819	4210	4384	3493	3681	3186	3207	3387	3215	3273	112.171	124.644	116.246	104.646	115.811	97.3529	97.1764	104.09	104.121	99.0818
ENSMUSG00000031822	947.816	821.021	975.607	952.023	967.347	722.033	694.152	852.325	812.15	889.955	0.232341	0.0027885	0.447299	Gse1	8	120228456	120581390	+	10351	protein_coding	genetic suppressor element 1, coiled-coil protein [Source:MGI Symbol;Acc:MGI:1098275]	-	986	837	1110	962	930	710	690	840	752	883	4.12123	3.52644	4.18841	4.10129	4.16376	3.08732	2.9753	3.67362	3.46573	3.8039
ENSMUSG00000024211	298.956	314.872	323.444	299.858	343.252	264.407	267.601	271.932	309.956	284.221	0.177295	0.0314439	0.856052	Grm8	6	27275119	28135178	-	9898	protein_coding	glutamate receptor, metabotropic 8 [Source:MGI Symbol;Acc:MGI:1351345]	-	311	321	368	303	330	260	266	268	287	282	1.35939	1.41433	1.45214	1.3509	1.54508	1.18231	1.1995	1.2257	1.38323	1.27043
ENSMUSG00000001985	2419.53	2055.98	2301.03	2219.74	2315.39	1903.73	1988.9	2108.49	1949.37	2176.01	0.159632	0.0041036	0.486127	Grik3	4	125490700	125714173	+	8973	protein_coding	glutamate receptor, ionotropic, kainate 3 [Source:MGI Symbol;Acc:MGI:95816]	-	2517	2096	2618	2243	2226	1872	1977	2078	1805	2159	12.1361	10.187	11.3957	11.0311	11.4967	9.39018	9.83408	10.4835	9.59618	10.7292
ENSMUSG00000020176	3154.9	2847.58	3534.16	3282.6	3879.79	2779.32	2688.08	3353.49	2957	3148.61	0.161834	0.0453997	0.915525	Grb10	11	11930508	12038683	-	9089	protein_coding	growth factor receptor bound protein 10 [Source:MGI Symbol;Acc:MGI:103232]	-	3282	2903	4021	3317	3730	2733	2672	3305	2738	3124	15.6227	13.9291	17.2793	16.1049	19.0186	13.5341	13.1215	16.4609	14.3706	15.3266
ENSMUSG00000056380	381.626	329.585	381.453	291.94	401.501	240	246.474	270.917	339.116	348.725	0.306218	0.0124517	0.693745	Gpr50	X	71663667	71669257	+	3069	protein_coding	G-protein-coupled receptor 50 [Source:MGI Symbol;Acc:MGI:1333877]	-	397	336	434	295	386	236	245	267	314	346	5.59662	4.77458	5.52334	4.24182	5.82875	3.46115	3.56315	3.93833	4.88081	5.02724
ENSMUSG00000039904	1588.02	1601.82	1488.9	1644.76	1396.93	1903.73	1865.16	1747.27	1801.42	1634.78	-0.213469	0.000298817	0.173106	Gpr37	6	25665878	25690729	-	6068	protein_coding	G protein-coupled receptor 37 [Source:MGI Symbol;Acc:MGI:1313297]	-	1652	1633	1694	1662	1343	1872	1854	1722	1668	1622	11.7787	11.7364	10.9038	12.0868	10.2569	13.8856	13.6373	12.8465	13.1132	11.9194
ENSMUSG00000070337	288.382	329.585	363.875	246.418	339.091	196.271	222.33	268.888	278.636	239.875	0.379433	0.00173778	0.352494	Gpr179	11	97332109	97352077	-	9542	protein_coding	G protein-coupled receptor 179 [Source:MGI Symbol;Acc:MGI:2443409]	-	300	336	414	249	326	193	221	265	258	238	1.36024	1.53565	1.69461	1.15156	1.5833	0.910382	1.03375	1.2572	1.28985	1.11221
ENSMUSG00000052229	828.618	737.643	695.23	833.267	893.496	832.881	831.977	981.188	884.509	934.302	-0.163887	0.0333314	0.860175	Gpr17	18	31942997	31949636	-	5195	protein_coding	G protein-coupled receptor 17 [Source:MGI Symbol;Acc:MGI:3584514]	-	862	752	791	842	859	819	827	967	819	927	7.17884	6.31285	5.94703	7.15244	7.6629	7.09585	7.10534	8.42633	7.52068	7.95692
ENSMUSG00000031210	1055.48	1023.09	1351.79	1179.64	1311.64	910.169	912.458	1093.82	1031.39	913.136	0.285073	0.000991871	0.252286	Gpr165	X	96713441	96719388	+	4545	protein_coding	G protein-coupled receptor 165 [Source:MGI Symbol;Acc:MGI:1923456]	-	1098	1043	1538	1192	1261	895	907	1078	955	906	10.452	10.0079	13.217	11.5736	12.8578	8.86329	8.90714	10.737	10.0237	8.88884
ENSMUSG00000043398	501.785	417.867	491.319	417.623	495.115	411.864	382.287	431.236	374.755	440.442	0.187366	0.0230514	0.833379	Gpr135	12	72067976	72071125	-	3150	protein_coding	G protein-coupled receptor 135 [Source:MGI Symbol;Acc:MGI:2676315]	-	522	426	559	422	476	405	380	425	347	437	7.16956	5.89783	6.93123	5.91193	7.00296	5.78696	5.3844	6.10767	5.25506	6.18617
ENSMUSG00000036357	1248.69	993.66	1310.48	1155.89	1480.14	844.067	832.983	1223.69	1217.14	1100.6	0.246164	0.0402132	0.900166	Gpr101	X	57496668	57503757	-	5410	protein_coding	G protein-coupled receptor 101 [Source:MGI Symbol;Acc:MGI:2685211]	-	1299	1013	1491	1168	1423	830	828	1206	1127	1092	10.3883	8.16592	10.7644	9.52737	12.1897	6.90537	6.83121	10.0913	9.93769	9.0007
ENSMUSG00000021340	1954.27	2120.72	2025.92	1996.08	2169.77	1714.58	1778.64	1989.77	2009.85	1929.08	0.123864	0.0265429	0.845499	Gpld1	13	24943152	24992501	+	5415	protein_coding	glycosylphosphatidylinositol specific phospholipase D1 [Source:MGI Symbol;Acc:MGI:106604]	-	2033	2162	2305	2017	2086	1686	1768	1961	1861	1914	16.2432	17.4121	16.6258	16.4375	17.8526	14.0141	14.573	16.3937	16.3948	15.7614
ENSMUSG00000028869	1088.16	959.329	1001.1	1075.73	1080.72	1134.91	1133.78	1164.84	1121.03	1060.29	-0.109766	0.0423874	0.905032	Gnl2	4	125016585	125055380	+	3683	protein_coding	guanine nucleotide binding protein-like 2 (nucleolar) [Source:MGI Symbol;Acc:MGI:2385207]	-	1132	978	1139	1087	1039	1116	1127	1148	1038	1052	13.2977	11.5806	12.079	13.0243	13.0737	13.6386	13.658	14.1103	13.4448	12.7369
ENSMUSG00000063594	32.6833	15.6945	23.731	38.5955	23.9236	178.983	42.2527	46.6749	47.5194	28.2205	-1.35223	0.0119304	0.684445	Gng8	7	16891786	16895436	+	1522	protein_coding	guanine nucleotide binding protein (G protein), gamma 8 [Source:MGI Symbol;Acc:MGI:109163]	-	34	16	27	39	23	176	42	46	44	28	0.966489	0.458457	0.69288	1.13078	0.700323	5.2048	1.23168	1.36817	1.3791	0.82034
ENSMUSG00000071658	3338.5	3134	2976.04	3002.53	3032.06	3264.4	3347.02	3208.39	3446.24	3324.99	-0.0996553	0.0209781	0.819153	Gng3	19	8836929	8839246	-	1699	protein_coding	guanine nucleotide binding protein (G protein), gamma 3 [Source:MGI Symbol;Acc:MGI:102704]	-	3473	3195	3386	3034	2915	3210	3327	3162	3191	3299	88.439	82.0107	77.8399	78.8043	79.5116	85.0389	87.4025	84.2492	89.5968	86.5844
ENSMUSG00000032766	248.97	267.788	232.036	204.853	215.313	355.932	294.763	242.507	255.957	251.969	-0.261213	0.0270284	0.845499	Gng11	6	4003904	4008445	+	919	protein_coding	guanine nucleotide binding protein (G protein), gamma 11 [Source:MGI Symbol;Acc:MGI:1913316]	-	259	273	264	207	207	350	293	239	237	250	12.1932	12.9551	11.2201	9.93991	10.4385	17.1419	14.2304	11.7728	12.3025	12.1304
ENSMUSG00000110060	6.72892	10.79	7.91032	8.90666	4.16063	2.0339	2.01204	5.07336	3.23996	2.01575	1.42642	0.0170165	1	Gm9860	7	46204549	46208201	+	3653	TEC	predicted gene 9860 [Source:MGI Symbol;Acc:MGI:3642591]	-	7	11	9	9	4	2	2	5	3	2	0.082905	0.131322	0.0962281	0.108723	0.0507453	0.0246426	0.0244368	0.0619609	0.0391769	0.0244136
ENSMUSG00000108084	3.84509	5.88545	6.15247	8.90666	4.16063	9.15254	23.1384	8.11738	11.8798	9.07089	-1.08277	0.0233998	0.836726	Gm7932	6	48860329	48866083	+	2194	lincRNA	predicted gene 7932 [Source:MGI Symbol;Acc:MGI:3643446]	-	4	6	7	9	4	9	23	8	11	9	0.078878	0.119263	0.124615	0.181023	0.0844907	0.184634	0.467903	0.165063	0.239175	0.182918
ENSMUSG00000091230	31.722	23.5418	12.3049	27.7096	12.4819	10.1695	10.0602	13.1907	19.4397	10.0788	0.779262	0.0354322	0.879496	Gm6970	19	47170469	47171134	-	666	protein_coding	predicted gene 6970 [Source:MGI Symbol;Acc:MGI:3645322]	-	33	24	14	28	12	10	10	13	18	10	2.14374	1.57156	0.821037	1.85529	0.835011	0.675821	0.670178	0.883622	1.28931	0.66954
ENSMUSG00000083670	0	1.96182	0	1.97926	4.16063	11.1864	5.03009	3.04402	3.23996	6.04726	-1.85835	0.0236448	1	Gm6829	X	9327749	9328108	-	360	processed_pseudogene	predicted pseudogene 6829 [Source:MGI Symbol;Acc:MGI:3648590]	-	0	2	0	2	4	11	5	3	3	6	0	0.242282	0	0.245163	0.514924	1.3753	0.619915	0.377239	0.397537	0.743189
ENSMUSG00000111877	5.76764	6.86636	5.27355	2.96889	8.32126	7.11864	12.0722	12.1761	19.4397	8.06301	-1.01194	0.0304576	0.856052	Gm6477	10	39198538	39199301	+	764	processed_pseudogene	predicted gene 6477 [Source:MGI Symbol;Acc:MGI:3647945]	-	6	7	6	3	8	7	12	12	18	8	0.339774	0.399574	0.306737	0.173283	0.485268	0.412392	0.701056	0.711026	1.12393	0.466925
ENSMUSG00000095845	1.92255	12.7518	9.66817	6.9274	9.36142	222.712	31.1866	6.08803	8.63989	17.1339	-2.81441	0.00467566	0.486127	Gm5741	8	85067568	85067982	-	328	protein_coding	predicted gene 5741 [Source:MGI Symbol;Acc:MGI:3645690]	-	2	13	11	7	9	219	31	6	8	17	0.263808	1.72847	1.30987	0.941785	1.27161	30.0522	4.21845	0.828085	1.16352	2.31114
ENSMUSG00000116083	0	0	0.878925	0	1.04016	3.05085	1.00602	1.01467	6.47992	1.00788	-2.65317	0.0444985	1	Gm5469	15	41922076	41923151	+	1076	processed_pseudogene	predicted gene 5469 [Source:MGI Symbol;Acc:MGI:3645122]	-	0	0	1	0	1	3	1	1	6	1	0	0	0.0362992	0	0.0430698	0.125492	0.0414813	0.0420712	0.26601	0.0414418
ENSMUSG00000091318	5.76764	1.96182	6.15247	3.95852	7.28111	24.4068	13.0782	4.05869	8.63989	8.06301	-1.21389	0.0268325	1	Gm5415	1	32543686	32547294	-	3609	protein_coding	predicted gene 5415 [Source:MGI Symbol;Acc:MGI:3644687]	-	6	2	7	4	7	24	13	4	8	8	0.0719278	0.0241677	0.0757565	0.0489103	0.0898869	0.299316	0.160776	0.050173	0.105746	0.0988448
ENSMUSG00000051537	287.421	301.139	355.965	339.443	373.417	303.051	263.577	298.314	302.396	268.095	0.207658	0.0254804	0.845499	Gm5124	X	21360865	21364622	+	2742	transcribed_processed_pseudogene	predicted pseudogene 5124 [Source:MGI Symbol;Acc:MGI:3643622]	-	299	307	405	343	359	298	262	294	280	266	4.71776	4.88274	5.76895	5.52019	6.06754	4.89164	4.2648	4.85375	4.87135	4.32578
ENSMUSG00000051729	0	0	0	0	1.04016	1.01695	4.02407	4.05869	1.07999	1.00788	-3.07666	0.0241537	1	Gm5087	14	13157388	13284638	-	2982	processed_transcript	predicted gene 5087 [Source:MGI Symbol;Acc:MGI:3643653]	-	0	0	0	0	1	1	4	4	1	1	0	0	0	0	0.015541	0.0150938	0.0598711	0.0607225	0.0159975	0.0149535
ENSMUSG00000116439	7.69019	8.82818	7.0314	8.90666	7.28111	3.05085	4.02407	1.01467	3.23996	4.03151	1.36977	0.0155272	1	Gm49528	16	14479898	14483746	-	780	unprocessed_pseudogene	predicted gene, 49528 [Source:MGI Symbol;Acc:MGI:6155229]	-	8	9	8	9	7	3	4	1	3	4	0.443739	0.5032	0.400594	0.509185	0.4159	0.173114	0.228892	0.0580367	0.183479	0.228674
ENSMUSG00000116238	4.80637	0.980909	2.63677	3.95852	4.16063	0	0	1.01467	0	2.01575	2.43065	0.0334058	1	Gm49413	15	76577825	76580863	+	3039	TEC	predicted gene, 49413 [Source:MGI Symbol;Acc:MGI:6155041]	-	5	1	3	4	4	0	0	1	0	2	0.0711823	0.0143503	0.0385567	0.058084	0.0609979	0	0	0.0148959	0	0.0293461
ENSMUSG00000114995	147.075	159.888	174.027	145.475	156.024	132.203	124.746	137.995	112.319	131.024	0.294275	0.00900731	0.628017	Gm49284	15	31621972	31624035	+	2064	TEC	predicted gene, 49284 [Source:MGI Symbol;Acc:MGI:6118771]	-	153	163	198	147	150	130	124	136	104	130	3.20711	3.44406	3.74683	3.14293	3.36796	2.83491	2.68149	2.98282	2.40371	2.80856
ENSMUSG00000115710	1.92255	0.980909	1.75785	0.989629	0	1.01695	4.02407	1.01467	7.5599	8.06301	-1.91243	0.0426054	1	Gm49208	15	31453738	31454901	+	397	bidirectional_promoter_lncRNA	predicted gene, 49208 [Source:MGI Symbol;Acc:MGI:6118659]	-	2	1	2	1	0	1	4	1	7	8	0.217958	0.109851	0.196765	0.111157	0	0.113375	0.449712	0.114027	0.841136	0.898566
ENSMUSG00000115573	1.92255	6.86636	5.27355	1.97926	3.12047	0	0	1.01467	2.15997	2.01575	1.9019	0.0478906	1	Gm49131	14	73335092	73335341	+	250	processed_pseudogene	predicted gene, 49131 [Source:MGI Symbol;Acc:MGI:6118541]	-	2	7	6	2	3	0	0	1	2	2	0.346117	1.2211	0.93739	0.353035	0.556118	0	0	0.181075	0.381636	0.356731
ENSMUSG00000110895	1.92255	0	5.27355	4.94814	4.16063	0	0	1.01467	1.07999	1.00788	2.40673	0.0419003	1	Gm48822	9	75582739	75585109	-	2371	TEC	predicted gene, 48822 [Source:MGI Symbol;Acc:MGI:6098540]	-	2	0	6	5	4	0	0	1	1	1	0.0364948	0	0.098839	0.0930606	0.0781833	0	0	0.0190926	0.02012	0.018807
ENSMUSG00000054556	60.5602	66.7018	59.7669	62.3466	58.2488	76.2711	63.3791	89.2912	65.8791	95.7483	-0.345633	0.0367449	0.885095	Gm4876	6	17065010	17171833	-	3058	antisense	predicted gene 4876 [Source:MGI Symbol;Acc:MGI:3647654]	-	63	68	68	63	56	75	63	88	61	95	0.891324	0.96976	0.868521	0.90914	0.848664	1.1039	0.919534	1.30269	0.951593	1.38528
ENSMUSG00000113078	2.88382	0.980909	1.75785	0	2.08032	5.08474	2.01204	1.01467	9.71987	13.1024	-1.99972	0.0197315	1	Gm48734	13	62734907	62737195	-	2289	TEC	predicted gene, 48734 [Source:MGI Symbol;Acc:MGI:6098397]	-	3	1	2	0	2	5	2	1	9	13	0.0567033	0.0190523	0.0341266	0	0.040492	0.0983173	0.0389986	0.0197766	0.187567	0.253249
ENSMUSG00000110722	0	0.980909	0	0	0	4.06779	2.01204	3.04402	0	1.00788	-2.93501	0.0429246	1	Gm48716	9	37118656	37120064	+	733	antisense	predicted gene, 48716 [Source:MGI Symbol;Acc:MGI:6098365]	-	0	1	0	0	0	4	2	3	0	1	0	0.0594962	0	0	0	0.245619	0.121784	0.185274	0	0.060834
ENSMUSG00000111971	52.8701	89.2627	52.7355	66.3051	58.2488	31.5254	40.2407	58.851	39.9595	57.449	0.483917	0.0280667	0.845499	Gm48678	12	4595340	4655888	-	5319	antisense	predicted gene, 48678 [Source:MGI Symbol;Acc:MGI:6098299]	-	55	91	60	67	56	31	40	58	37	57	0.447368	0.746112	0.440585	0.555869	0.487914	0.262324	0.335656	0.493623	0.331841	0.477854
ENSMUSG00000114298	0	0	0	0	0	0	1.00602	2.02934	3.23996	2.01575	-3.21378	0.0467653	1	Gm48371	14	9443375	9469555	-	457	lincRNA	predicted gene, 48371 [Source:MGI Symbol;Acc:MGI:6097844]	-	0	0	0	0	0	0	1	2	3	2	0	0	0	0	0	0	0.0976671	0.198112	0.313158	0.195148
ENSMUSG00000114049	5.76764	5.88545	5.27355	6.9274	3.12047	3.05085	1.00602	1.01467	1.07999	0	2.13577	0.00906557	1	Gm48140	12	16672240	16685013	+	2057	antisense	predicted gene, 48140 [Source:MGI Symbol;Acc:MGI:6097506]	-	6	6	6	7	3	3	1	1	1	0	0.126197	0.127207	0.113927	0.150173	0.0675884	0.0656437	0.0216985	0.0220071	0.0231913	0
ENSMUSG00000110832	0	1.96182	0	1.97926	1.04016	9.15254	2.01204	3.04402	3.23996	2.01575	-1.99313	0.0431168	1	Gm48125	10	49799325	49801079	+	1755	TEC	predicted gene, 48125 [Source:MGI Symbol;Acc:MGI:6097482]	-	0	2	0	2	1	9	2	3	3	2	0	0.0496988	0	0.0502899	0.0264063	0.230819	0.0508648	0.0773823	0.0815461	0.0508164
ENSMUSG00000113852	171.107	176.564	210.942	189.019	190.349	252.203	253.516	195.832	191.158	206.615	-0.22874	0.0416231	0.905032	Gm48062	12	98794448	98797069	+	2622	TEC	predicted gene, 48062 [Source:MGI Symbol;Acc:MGI:6097387]	-	178	180	240	191	183	248	252	193	177	205	2.93711	2.99387	3.57509	3.21461	3.23447	4.25721	4.28976	3.33213	3.22032	3.48636
ENSMUSG00000114083	0.961274	0	0	0	1.04016	5.08474	0	1.01467	3.23996	4.03151	-2.75177	0.0391957	1	Gm47860	12	27262540	27266567	-	4028	transcribed_processed_pseudogene	predicted gene, 47860 [Source:MGI Symbol;Acc:MGI:6097075]	-	1	0	0	0	1	5	0	1	3	4	0.010741	0	0	0	0.0115052	0.055871	0	0.0112385	0.0355296	0.0442814
ENSMUSG00000112760	0	0	0	0	0	2.0339	3.01805	2.02934	1.07999	0	-3.19696	0.0482011	1	Gm47539	10	81876151	81876667	-	337	processed_pseudogene	predicted gene, 47539 [Source:MGI Symbol;Acc:MGI:6096547]	-	0	0	0	0	0	2	3	2	1	0	0	0	0	0	0	0.26712	0.397334	0.268657	0.141556	0
ENSMUSG00000112274	1.92255	1.96182	0.878925	0	1.04016	3.05085	6.03611	6.08803	5.39993	6.04726	-2.19772	0.00716194	1	Gm47525	12	76254562	76255334	-	773	bidirectional_promoter_lncRNA	predicted gene, 47525 [Source:MGI Symbol;Acc:MGI:6096526]	-	2	2	1	0	1	3	6	6	5	6	0.111939	0.112835	0.0505277	0	0.0599523	0.174682	0.346447	0.351374	0.308567	0.346117
ENSMUSG00000114291	3.84509	1.96182	4.39462	4.94814	3.12047	0	1.00602	1.01467	0	1.00788	2.57903	0.016998	1	Gm47471	17	66738754	66746047	+	1300	antisense	predicted gene, 47471 [Source:MGI Symbol;Acc:MGI:6096440]	-	4	2	5	5	3	0	1	1	0	1	0.133122	0.0670934	0.150223	0.169728	0.106946	0	0.0343338	0.034822	0	0.034301
ENSMUSG00000111030	0	0	0	0.989629	0	0	2.01204	2.02934	5.39993	1.00788	-2.96693	0.042948	1	Gm47234	9	44634195	44635103	+	909	TEC	predicted gene, 47234 [Source:MGI Symbol;Acc:MGI:6096052]	-	0	0	0	1	0	0	2	2	5	1	0	0	0	0.0485471	0	0	0.0982044	0.099601	0.262401	0.0490554
ENSMUSG00000107838	34.6059	19.6182	31.6413	36.6163	26.0039	42.7118	45.2708	43.6309	38.8795	40.3151	-0.503928	0.0230659	0.833379	Gm45769	6	133110474	133112301	+	1828	TEC	predicted gene 45769 [Source:MGI Symbol;Acc:MGI:5804884]	-	36	20	36	37	25	42	45	43	36	40	0.852038	0.477141	0.769193	0.893209	0.633796	1.03414	1.09876	1.06485	0.939475	0.975741
ENSMUSG00000109810	10.574	6.86636	14.0628	15.8341	11.4417	13.2203	19.1143	20.2934	33.4796	19.1497	-0.834014	0.0182758	0.777813	Gm45592	8	11637282	11638324	+	1043	TEC	predicted gene 45592 [Source:MGI Symbol;Acc:MGI:5791428]	-	11	7	16	16	11	13	19	20	31	19	0.45629	0.292689	0.599162	0.67696	0.488758	0.561003	0.813081	0.868047	1.41787	0.812307
ENSMUSG00000109387	3.84509	0.980909	0	3.95852	3.12047	0	0	0	0	1.00788	3.07313	0.0298837	1	Gm45182	7	91158600	91161003	+	2404	TEC	predicted gene 45182 [Source:MGI Symbol;Acc:MGI:5753758]	-	4	1	0	4	3	0	0	0	0	1	0.0719877	0.0181409	0	0.0734265	0.0578325	0	0	0	0	0.0185488
ENSMUSG00000109337	6.72892	5.88545	2.63677	3.95852	6.24095	15.2542	10.0602	8.11738	9.71987	7.05514	-0.989882	0.0410111	1	Gm45047	7	120890705	120891013	+	309	TEC	predicted gene 45047 [Source:MGI Symbol;Acc:MGI:5753623]	-	7	6	3	4	6	15	10	8	9	7	0.980104	0.846809	0.379203	0.571254	0.899867	2.18494	1.44446	1.172	1.38945	1.01016
ENSMUSG00000108325	35.5671	39.2363	43.0673	53.44	44.7268	47.7966	69.4152	68.9977	73.4391	46.3623	-0.501997	0.0126591	0.700808	Gm44898	7	55275936	55278158	+	2223	TEC	predicted gene 44898 [Source:MGI Symbol;Acc:MGI:5753474]	-	37	40	49	54	43	47	69	68	68	46	0.720103	0.784718	0.860925	1.07197	0.896426	0.951622	1.3854	1.38474	1.45925	0.922718
ENSMUSG00000108477	8.65146	13.7327	17.5785	16.8237	13.5221	8.13559	8.04814	10.1467	6.47992	8.06301	0.78294	0.0448021	0.913452	Gm44878	7	4658660	4659954	+	1295	TEC	predicted gene 44878 [Source:MGI Symbol;Acc:MGI:5753454]	-	9	14	20	17	13	8	8	10	6	8	0.300681	0.471467	0.603211	0.579304	0.465221	0.278052	0.275731	0.349565	0.221025	0.275468
ENSMUSG00000109505	9.61274	9.80909	11.426	11.8755	22.8835	28.4746	25.1504	20.2934	21.5997	11.0866	-0.708132	0.0469623	0.916309	Gm44677	7	91627272	91631010	+	3739	TEC	predicted gene 44677 [Source:MGI Symbol;Acc:MGI:5753253]	-	10	10	13	12	22	28	25	20	20	11	0.115712	0.116637	0.135799	0.141629	0.27268	0.337061	0.298435	0.242143	0.255172	0.131186
ENSMUSG00000083626	0.961274	1.96182	1.75785	4.94814	2.08032	15.2542	4.02407	9.13205	4.31994	6.04726	-1.73694	0.00997666	1	Gm4459	7	139659688	139660155	-	468	processed_pseudogene	predicted gene 4459 [Source:MGI Symbol;Acc:MGI:3782643]	-	1	2	2	5	2	15	4	9	4	6	0.0924457	0.18637	0.166914	0.471467	0.198048	1.44262	0.381486	0.870551	0.40773	0.571684
ENSMUSG00000107620	79.7857	122.614	114.26	93.0251	110.257	88.4745	70.4212	87.2618	77.759	84.6616	0.347849	0.021662	0.819599	Gm44256	7	3337545	3337879	+	335	TEC	predicted gene, 44256 [Source:MGI Symbol;Acc:MGI:5690648]	-	83	125	130	94	106	87	70	86	72	84	10.7193	16.2726	15.1568	12.3826	14.6638	11.6891	9.32648	11.6212	10.2529	11.1811
ENSMUSG00000108103	2.88382	1.96182	5.27355	9.89629	3.12047	0	2.01204	1.01467	1.07999	2.01575	1.91583	0.0300868	1	Gm44081	6	112947037	112949330	+	643	lincRNA	predicted gene, 44081 [Source:MGI Symbol;Acc:MGI:5690473]	-	3	2	6	10	3	0	2	1	1	2	0.201857	0.135648	0.364459	0.686304	0.21622	0	0.13883	0.0704022	0.0741904	0.138698
ENSMUSG00000108283	3.84509	3.92363	4.39462	5.93777	1.04016	0	0	0	0	0	4.34842	0.00037887	1	Gm44008	6	54693646	54694057	+	412	TEC	predicted gene, 44008 [Source:MGI Symbol;Acc:MGI:5690400]	-	4	4	5	6	1	0	0	0	0	0	0.420045	0.423405	0.474004	0.64266	0.112483	0	0	0	0	0
ENSMUSG00000108256	0	0.980909	0.878925	0	0	3.05085	6.03611	4.05869	2.15997	2.01575	-3.12971	0.00835146	1	Gm43923	6	93194941	93197851	+	2911	TEC	predicted gene, 43923 [Source:MGI Symbol;Acc:MGI:5690315]	-	0	1	1	0	0	3	6	4	2	2	0	0.0149813	0.0134173	0	0	0.0463858	0.091997	0.0622035	0.0327753	0.0306365
ENSMUSG00000106928	40.3735	49.0454	36.9148	38.5955	47.8473	37.6271	24.1444	31.4548	31.3196	31.2442	0.447297	0.0378722	0.887644	Gm43860	5	35551260	35553964	-	2705	TEC	predicted gene 43860 [Source:MGI Symbol;Acc:MGI:5663997]	-	42	50	42	39	46	37	24	31	29	31	0.671761	0.806112	0.606444	0.636246	0.78809	0.615659	0.396012	0.51879	0.511434	0.511028
ENSMUSG00000107086	70.173	74.5491	84.3768	84.1184	69.6906	72.2033	48.2889	56.8216	50.7593	58.4568	0.4192	0.0113935	0.67732	Gm43808	5	30868764	30870828	-	2065	TEC	predicted gene 43808 [Source:MGI Symbol;Acc:MGI:5663945]	-	73	76	96	85	67	71	48	56	47	58	1.52945	1.60504	1.81577	1.81646	1.50363	1.54755	1.03749	1.22762	1.08577	1.25244
ENSMUSG00000106462	0	0	0.878925	0	0	3.05085	1.00602	5.07336	1.07999	0	-2.94279	0.0483479	1	Gm43725	3	138503844	138504212	-	369	processed_pseudogene	predicted gene 43725 [Source:MGI Symbol;Acc:MGI:5663862]	-	0	0	1	0	0	3	1	5	1	0	0	0	0.105848	0	0	0.365932	0.120959	0.613396	0.12928	0
ENSMUSG00000107019	35.5671	35.3127	24.6099	44.5333	36.4055	70.1694	44.2648	48.7043	37.7995	47.3702	-0.498859	0.0280176	0.845499	Gm43682	5	93176970	93179059	+	2090	TEC	predicted gene 43682 [Source:MGI Symbol;Acc:MGI:5663819]	-	37	36	28	45	35	69	44	48	35	47	0.765928	0.751189	0.523264	0.950154	0.776081	1.48597	0.939661	1.03966	0.798878	1.00277
ENSMUSG00000106365	8.65146	8.82818	8.78925	0.989629	13.5221	0	3.01805	1.01467	2.15997	7.05514	1.61701	0.028993	1	Gm43568	3	122622255	122630168	-	1844	lincRNA	predicted gene 43568 [Source:MGI Symbol;Acc:MGI:5663705]	-	9	9	10	1	13	0	3	1	2	7	0.211161	0.21285	0.211811	0.0239313	0.326714	0	0.0726148	0.0245492	0.0517402	0.169273
ENSMUSG00000105063	25.9544	24.5227	16.6996	15.8341	20.8032	13.2203	7.04212	22.3228	9.71987	11.0866	0.708792	0.0435603	0.905752	Gm43488	3	37339017	37341520	+	2504	TEC	predicted gene 43488 [Source:MGI Symbol;Acc:MGI:5663625]	-	27	25	19	16	20	13	7	22	9	11	0.466511	0.43541	0.296366	0.281977	0.370153	0.233676	0.124775	0.397728	0.171462	0.195889
ENSMUSG00000105810	2.88382	1.96182	7.0314	1.97926	8.32126	1.01695	2.01204	1.01467	0	1.00788	2.12117	0.0238131	1	Gm43435	3	108555467	108556904	+	1438	TEC	predicted gene 43435 [Source:MGI Symbol;Acc:MGI:5663572]	-	3	2	8	2	8	1	2	1	0	1	0.0902599	0.0606546	0.21729	0.061376	0.25782	0.0313002	0.0620777	0.0314803	0	0.0310093
ENSMUSG00000105543	0.961274	0.980909	0	0	0	1.01695	3.01805	6.08803	1.07999	1.00788	-2.62575	0.0464714	1	Gm43169	5	22863812	22868545	-	4734	TEC	predicted gene 43169 [Source:MGI Symbol;Acc:MGI:5663306]	-	1	1	0	0	0	1	3	6	1	1	0.00913912	0.00921223	0	0	0	0.00950775	0.0282851	0.0573747	0.010077	0.00941938
ENSMUSG00000105733	0	0.980909	0	0	0	1.01695	1.00602	0	6.47992	4.03151	-3.23061	0.0267221	1	Gm42973	3	127240576	127243775	-	3200	TEC	predicted gene 42973 [Source:MGI Symbol;Acc:MGI:5663110]	-	0	1	0	0	0	1	1	0	6	4	0	0.0136283	0	0	0	0.0140655	0.0139481	0	0.0894459	0.0557392
ENSMUSG00000104605	4.80637	1.96182	9.66817	6.9274	3.12047	1.01695	2.01204	3.04402	0	1.00788	1.90122	0.0219701	1	Gm42922	3	37638579	37640656	-	2078	TEC	predicted gene 42922 [Source:MGI Symbol;Acc:MGI:5663059]	-	5	2	11	7	3	1	2	3	0	1	0.104102	0.0419737	0.206755	0.148655	0.0669054	0.0216601	0.0429585	0.0653541	0	0.0214588
ENSMUSG00000107340	1.92255	1.96182	4.39462	4.94814	9.36142	3.05085	0	0	1.07999	1.00788	2.13239	0.0267909	1	Gm42789	5	114715554	114716120	-	567	antisense	predicted gene 42789 [Source:MGI Symbol;Acc:MGI:5662926]	-	2	2	5	5	9	3	0	0	1	1	0.152609	0.15383	0.344426	0.389148	0.735605	0.238146	0	0	0.0841348	0.0786444
ENSMUSG00000105922	4.80637	5.88545	4.39462	4.94814	2.08032	12.2034	8.04814	4.05869	10.7999	10.0788	-1.02416	0.0476088	1	Gm42769	5	49115759	49117417	-	1659	TEC	predicted gene 42769 [Source:MGI Symbol;Acc:MGI:5662906]	-	5	6	5	5	2	12	8	4	10	10	0.130394	0.157724	0.117715	0.133	0.0558687	0.325567	0.215233	0.109147	0.287549	0.268785
ENSMUSG00000106525	1.92255	0.980909	0.878925	2.96889	1.04016	0	0	0	0	0	3.0448	0.046245	1	Gm42695	3	34565265	34572202	-	818	lincRNA	predicted gene 42695 [Source:MGI Symbol;Acc:MGI:5662832]	-	2	1	1	3	1	0	0	0	0	0	0.105781	0.0533138	0.047748	0.161844	0.0566542	0	0	0	0	0
ENSMUSG00000107205	0	0	0	0	0	3.05085	0	4.05869	1.07999	1.00788	-3.3687	0.0365103	1	Gm42576	5	75020236	75023081	-	2846	TEC	predicted gene 42576 [Source:MGI Symbol;Acc:MGI:5662713]	-	0	0	0	0	0	3	0	4	1	1	0	0	0	0	0	0.0474452	0	0.0636242	0.0167619	0.0156681
ENSMUSG00000106990	259.544	263.864	286.529	294.909	309.967	211.525	219.312	206.993	248.397	306.395	0.246136	0.0286458	0.845499	Gm42547	6	28211008	28214805	-	3798	TEC	predicted gene 42547 [Source:MGI Symbol;Acc:MGI:5662684]	-	270	269	326	298	298	208	218	204	230	304	3.07568	3.0888	3.35252	3.46249	3.63619	2.46499	2.56192	2.43149	2.8889	3.56919
ENSMUSG00000104727	30.7608	29.4273	22.852	43.5437	31.2047	39.661	42.2527	42.6162	56.1593	41.3229	-0.495248	0.0271675	0.845499	Gm42500	5	128448904	128449782	+	517	lincRNA	predicted gene 42500 [Source:MGI Symbol;Acc:MGI:5662637]	-	32	30	26	44	30	39	42	42	52	41	2.67789	2.5306	1.96423	3.75569	2.68916	3.39531	3.62596	3.67753	4.79813	3.53626
ENSMUSG00000106275	28.8382	16.6754	14.9417	20.7822	27.0441	38.644	34.2046	42.6162	34.5596	30.2363	-0.74161	0.00376882	0.485285	Gm42495	5	128444416	128447731	+	405	lincRNA	predicted gene 42495 [Source:MGI Symbol;Acc:MGI:5662632]	-	30	17	17	21	26	38	34	42	32	30	3.20478	1.83057	1.63947	2.28819	2.97511	4.22313	3.74704	4.69452	3.76924	3.30306
ENSMUSG00000100426	0	0.980909	0	0	0	4.06779	4.02407	4.05869	3.23996	0	-3.53286	0.0069288	1	Gm4208	1	62821355	62832370	-	871	lincRNA	predicted gene 4208 [Source:MGI Symbol;Acc:MGI:3782384]	-	0	1	0	0	0	4	4	4	3	0	0	0.0500697	0	0	0	0.206703	0.204978	0.207893	0.164309	0
ENSMUSG00000105057	4.80637	4.90454	3.5157	3.95852	1.04016	0	0	1.01467	0	1.00788	3.12349	0.00792447	1	Gm40190	3	122293439	122303613	+	471	lincRNA	predicted gene, 40190 [Source:MGI Symbol;Acc:MGI:5623075]	-	5	5	4	4	1	0	0	1	0	1	0.459284	0.462958	0.331702	0.374772	0.0983931	0	0	0.0961117	0	0.0946738
ENSMUSG00000104168	42.296	47.0836	39.5516	52.4503	41.6063	27.4576	34.2046	26.3815	28.0796	36.2836	0.546396	0.0100063	0.63551	Gm38250	8	105566324	105578109	+	1108	antisense	predicted gene, 38250 [Source:MGI Symbol;Acc:MGI:5611478]	-	44	48	45	53	40	27	34	26	26	36	1.71809	1.88927	1.58629	2.11088	1.67304	1.09681	1.36963	1.06226	1.11942	1.44882
ENSMUSG00000102198	0	0	0	0.989629	0	1.01695	2.01204	2.02934	3.23996	3.02363	-3.08809	0.0186117	1	Gm38173	1	33671915	33674228	-	2314	TEC	predicted gene, 38173 [Source:MGI Symbol;Acc:MGI:5611401]	-	0	0	0	1	0	1	2	2	3	3	0	0	0	0.0190706	0	0.019451	0.0385773	0.0391259	0.0618467	0.0578107
ENSMUSG00000103331	0	1.96182	0	0	0	2.0339	2.01204	4.05869	3.23996	4.03151	-2.95472	0.0159809	1	Gm37995	6	40026894	40028607	+	1714	TEC	predicted gene, 37995 [Source:MGI Symbol;Acc:MGI:5611223]	-	0	2	0	0	0	2	2	4	3	4	0	0.0508876	0	0	0	0.05252	0.0520815	0.105644	0.0834967	0.104064
ENSMUSG00000104216	0	0	0	0.989629	0	8.13559	3.01805	1.01467	0	0	-3.19738	0.0465521	1	Gm37987	9	91757322	91758146	-	825	TEC	predicted gene, 37987 [Source:MGI Symbol;Acc:MGI:5611215]	-	0	0	0	1	0	8	3	1	0	0	0	0	0	0.0534901	0	0.436457	0.162305	0.0548711	0	0
ENSMUSG00000104503	0.961274	0.980909	0.878925	0	1.04016	1.01695	6.03611	4.05869	3.23996	7.05514	-2.47148	0.0126731	1	Gm37738	1	84819968	84824683	-	4716	TEC	predicted gene, 37738 [Source:MGI Symbol;Acc:MGI:5610966]	-	1	1	1	0	1	1	6	4	3	7	0.009174	0.00924739	0.008282	0	0.00982679	0.00954404	0.0567861	0.0383958	0.0303463	0.0661873
ENSMUSG00000103835	4.80637	8.82818	0	5.93777	0	2.0339	0	0	1.07999	0	2.66076	0.0483335	1	Gm37612	9	106870674	106871501	+	582	sense_intronic	predicted gene, 37612 [Source:MGI Symbol;Acc:MGI:5610840]	-	5	9	0	6	0	2	0	0	1	0	0.371689	0.674392	0	0.454942	0	0.154672	0	0	0.0819664	0
ENSMUSG00000091617	20.1867	21.58	26.3677	13.8548	19.763	11.1864	7.04212	7.10271	8.63989	6.04726	1.35204	0.000218825	0.158493	Gm3752	14	7466362	7483762	-	1824	protein_coding	predicted gene 3752 [Source:MGI Symbol;Acc:MGI:3781927]	-	21	22	30	14	19	11	7	7	8	6	0.498112	0.526006	0.6424	0.338712	0.482741	0.27144	0.171292	0.173728	0.20923	0.146682
ENSMUSG00000103200	2.88382	2.94273	3.5157	4.94814	4.16063	1.01695	1.00602	0	0	1.00788	2.58749	0.0157902	1	Gm37328	1	160726042	160726681	-	640	sense_intronic	predicted gene, 37328 [Source:MGI Symbol;Acc:MGI:5610556]	-	3	3	4	5	4	1	1	0	0	1	0.202803	0.204425	0.244112	0.344761	0.289645	0.0703276	0.0697404	0	0	0.069674
ENSMUSG00000103685	28.8382	36.2936	29.0045	27.7096	29.1244	14.2373	27.1625	15.2201	29.1596	14.1103	0.599426	0.0329951	0.860175	Gm37074	1	191249424	191251266	+	1843	TEC	predicted gene, 37074 [Source:MGI Symbol;Acc:MGI:5610302]	-	30	37	33	28	28	14	27	15	27	14	0.704253	0.875526	0.699355	0.670441	0.704074	0.341907	0.653888	0.368437	0.698872	0.33873
ENSMUSG00000111110	50.9475	22.5609	23.731	50.4711	19.763	81.3559	64.3851	39.5722	43.1994	51.4017	-0.74185	0.0127579	0.701807	Gm36855	9	43506551	43521004	-	2361	lincRNA	predicted gene, 36855 [Source:MGI Symbol;Acc:MGI:5596014]	-	53	23	27	51	19	80	64	39	40	51	0.971208	0.424839	0.44666	0.953239	0.372943	1.52511	1.2099	0.747766	0.808208	0.963219
ENSMUSG00000105686	27.8769	20.5991	27.2467	23.7511	13.5221	13.2203	15.0903	15.2201	8.63989	18.1418	0.68609	0.0323028	0.858733	Gm35394	5	99274095	99279284	+	3252	lincRNA	predicted gene, 35394 [Source:MGI Symbol;Acc:MGI:5594553]	-	29	21	31	24	13	13	15	15	8	18	0.385816	0.281619	0.372323	0.325678	0.185259	0.179928	0.205876	0.208804	0.117354	0.246816
ENSMUSG00000112168	34.6059	30.4082	36.9148	51.4607	24.9638	96.6101	49.2949	32.4695	71.2791	37.2914	-0.683754	0.0204754	0.817511	Gm34776	10	72940238	72949792	-	1140	lincRNA	predicted gene, 34776 [Source:MGI Symbol;Acc:MGI:5593935]	-	36	31	42	52	24	95	49	32	66	37	1.36625	1.1859	1.43898	2.01292	0.975645	3.75081	1.91847	1.2707	2.76184	1.44726
ENSMUSG00000110207	0	0	0.878925	0	0	2.0339	0	9.13205	1.07999	1.00788	-3.31938	0.0257897	1	Gm33586	7	112983903	113010892	+	892	lincRNA	predicted gene, 33586 [Source:MGI Symbol;Acc:MGI:5592745]	-	0	0	1	0	0	2	0	9	1	1	0	0	0.0437869	0	0	0.100919	0	0.456746	0.0534803	0.0499903
ENSMUSG00000110266	0	0	0	0	0	4.06779	0	3.04402	8.63989	1.00788	-4.22736	0.00327537	1	Gm32742	9	51130307	51165517	-	8516	protein_coding	predicted gene, 32742 [Source:MGI Symbol;Acc:MGI:5591901]	-	0	0	0	0	0	4	0	3	8	1	0	0	0	0	0	0.0211412	0	0.0159471	0.044814	0.00523619
ENSMUSG00000111602	7.69019	17.6564	14.0628	28.6992	14.5622	11.1864	6.03611	8.11738	8.63989	12.0945	0.84052	0.0409337	0.905032	Gm32014	9	8644073	8740988	-	8900	lincRNA	predicted gene, 32014 [Source:MGI Symbol;Acc:MGI:5591173]	-	8	18	16	29	14	11	6	8	8	12	0.0388895	0.0882014	0.0702164	0.143792	0.0728993	0.0556299	0.0300903	0.0406909	0.0428804	0.0601232
ENSMUSG00000110767	0.961274	0	0	0.989629	0	5.08474	4.02407	3.04402	2.15997	6.04726	-3.36338	0.00341653	1	Gm31432	9	46532757	46543376	+	594	lincRNA	predicted gene, 31432 [Source:MGI Symbol;Acc:MGI:5590591]	-	1	0	0	1	0	5	4	3	2	6	0.072836	0	0	0.0742918	0	0.378869	0.300565	0.228629	0.160621	0.450418
ENSMUSG00000103510	0.961274	0.980909	0.878925	0	0	3.05085	5.03009	2.02934	5.39993	1.00788	-2.51487	0.0267327	1	Gm30725	1	190419333	190444855	-	1419	lincRNA	predicted gene, 30725 [Source:MGI Symbol;Acc:MGI:5589884]	-	1	1	1	0	0	3	5	2	5	1	0.0304895	0.0307334	0.0275249	0	0	0.0951579	0.157272	0.0638036	0.168092	0.0314245
ENSMUSG00000114241	2.88382	9.80909	4.39462	2.96889	5.20079	12.2034	7.04212	12.1761	10.7999	10.0788	-1.053	0.0306737	1	Gm30108	14	20794239	20796560	+	449	lincRNA	predicted gene, 30108 [Source:MGI Symbol;Acc:MGI:5589267]	-	3	10	5	3	5	12	7	12	10	10	0.289073	0.971285	0.434943	0.294851	0.51607	1.20293	0.695851	1.20985	1.06246	0.993126
ENSMUSG00000102713	2.88382	7.84727	6.15247	8.90666	5.20079	18.3051	9.05416	14.2054	7.5599	16.126	-1.07781	0.0167907	0.774199	Gm29994	18	37829008	37830200	-	1193	antisense	predicted gene, 29994 [Source:MGI Symbol;Acc:MGI:5589153]	-	3	8	7	9	5	18	9	14	7	16	0.108796	0.292444	0.229175	0.332912	0.194229	0.679107	0.336718	0.531233	0.279909	0.59804
ENSMUSG00000100455	138.423	194.22	188.969	149.434	179.947	151.525	131.788	140.025	153.358	124.977	0.279674	0.0245955	0.845499	Gm29170	1	143777642	143781307	+	3666	sense_intronic	predicted gene 29170 [Source:MGI Symbol;Acc:MGI:5579876]	-	144	198	215	151	173	149	131	138	142	124	1.69943	2.35541	2.29063	1.81766	2.18695	1.82936	1.59494	1.70406	1.8478	1.50827
ENSMUSG00000100811	8.65146	6.86636	7.91032	8.90666	7.28111	14.2373	11.0662	12.1761	10.7999	19.1497	-0.768239	0.049641	0.925979	Gm29083	1	62714723	62718073	-	733	antisense	predicted gene 29083 [Source:MGI Symbol;Acc:MGI:5579789]	-	9	7	9	9	7	14	11	12	10	19	0.531216	0.416473	0.479565	0.541834	0.442567	0.859666	0.669813	0.741096	0.650811	1.15585
ENSMUSG00000101102	0	0	0.878925	0.989629	1.04016	7.11864	5.03009	0	4.31994	1.00788	-2.58847	0.0328071	1	Gm28609	1	133050128	133068405	-	463	antisense	predicted gene 28609 [Source:MGI Symbol;Acc:MGI:5579315]	-	0	0	1	1	1	7	5	0	4	1	0	0	0.0843583	0.0953118	0.100093	0.680492	0.482007	0	0.412134	0.0963096
ENSMUSG00000088139	6.72892	5.88545	9.66817	5.93777	6.24095	15.2542	15.0903	7.10271	11.8798	13.1024	-0.849387	0.0432121	0.905032	Gm27343	2	152417262	152417324	+	63	snRNA	predicted gene, 27343 [Source:MGI Symbol;Acc:MGI:5530725]	-	7	6	11	6	6	15	15	7	11	13	4.80718	4.1534	6.81963	4.2028	4.41363	10.7166	10.6271	5.02985	8.32935	9.20139
ENSMUSG00000097406	47.1024	53.95	80.8611	101.932	70.7307	64.0678	54.325	45.6603	41.0395	54.4253	0.449338	0.0405532	0.903243	Gm26833	6	39871532	39871971	-	440	antisense	predicted gene, 26833 [Source:MGI Symbol;Acc:MGI:5477327]	-	49	55	92	103	68	63	54	45	38	54	4.8181	5.45134	8.16665	10.3303	7.16212	6.44457	5.47779	4.62975	4.11993	5.47258
ENSMUSG00000097654	0	6.86636	1.75785	0.989629	3.12047	0	0	1.01467	0	0	3.175	0.0268126	1	Gm26714	8	24422404	24440008	+	1655	antisense	predicted gene, 26714 [Source:MGI Symbol;Acc:MGI:5477208]	-	0	7	2	1	3	0	0	1	0	0	0	0.184456	0.0471999	0.0266643	0.0840057	0	0	0.0273526	0	0
ENSMUSG00000097330	1.92255	5.88545	5.27355	4.94814	4.16063	8.13559	9.05416	10.1467	6.47992	11.0866	-1.01728	0.0425155	1	Gm26672	18	37746559	37768242	-	6918	processed_transcript	predicted gene, 26672 [Source:MGI Symbol;Acc:MGI:5477166]	-	2	6	6	5	4	8	9	10	6	11	0.0125078	0.0378237	0.033875	0.0318946	0.0267957	0.0520494	0.0580666	0.065436	0.0413742	0.0709027
ENSMUSG00000097219	3.84509	3.92363	0.878925	3.95852	1.04016	0	1.00602	0	0	0	3.27612	0.0114322	1	Gm26551	11	51949882	52269514	-	2432	lincRNA	predicted gene, 26551 [Source:MGI Symbol;Acc:MGI:5477045]	-	4	4	1	4	1	0	1	0	0	0	0.0711589	0.0717281	0.01606	0.0725812	0.0190556	0	0.0183527	0	0	0
ENSMUSG00000080530	0.961274	0	0	0	0	3.05085	1.00602	2.02934	2.15997	2.01575	-2.94784	0.0274969	1	Gm25540	11	109466311	109466431	-	121	miRNA	predicted gene, 25540 [Source:MGI Symbol;Acc:MGI:5455317]	-	1	0	0	0	0	3	1	2	2	2	0.357559	0	0	0	0	1.11594	0.368875	0.748242	0.788503	0.737047
ENSMUSG00000088609	0.961274	2.94273	1.75785	0	1.04016	5.08474	7.04212	1.01467	6.47992	6.04726	-1.92659	0.0209267	1	Gm24187	13	9834469	9834525	-	57	miRNA	predicted gene, 24187 [Source:MGI Symbol;Acc:MGI:5453964]	-	1	3	2	0	1	5	7	1	6	6	0.759028	2.2953	1.37045	0	0.813037	3.94822	5.48135	0.794187	5.02152	4.69383
ENSMUSG00000089296	8.65146	5.88545	6.15247	4.94814	8.32126	10.1695	10.0602	22.3228	11.8798	16.126	-1.05865	0.0124033	0.693745	Gm23205	18	38297939	38298041	+	103	snRNA	predicted gene, 23205 [Source:MGI Symbol;Acc:MGI:5452982]	-	9	6	7	5	8	10	10	22	11	16	3.7804	2.54043	2.65442	2.1422	3.59947	4.36987	4.33339	9.66903	5.09465	6.92681
ENSMUSG00000095334	156.688	210.895	225.884	205.843	222.594	187.119	161.969	155.245	149.038	144.126	0.357484	0.00304456	0.447299	Gm21984	7	126942144	126952873	+	822	processed_transcript	predicted gene 21984 [Source:MGI Symbol;Acc:MGI:5439453]	-	163	215	257	208	214	184	161	153	138	143	8.57923	11.4067	12.2115	11.1666	12.065	10.0752	8.74216	8.42591	8.00878	7.75738
ENSMUSG00000093622	0	0	0	0	0	2.0339	2.01204	1.01467	0	3.02363	-3.1869	0.0490819	1	Gm20703	17	70834664	70836044	+	385	lincRNA	predicted gene 20703 [Source:MGI Symbol;Acc:MGI:5313150]	-	0	0	0	0	0	2	2	1	0	3	0	0	0	0	0	0.233817	0.231864	0.117581	0	0.347465
ENSMUSG00000102882	27.8769	27.4654	29.8834	27.7096	24.9638	11.1864	20.1204	20.2934	14.0398	22.1733	0.650329	0.0181686	0.777813	Gm2065	9	83114108	83116864	+	2757	TEC	predicted gene 2065 [Source:MGI Symbol;Acc:MGI:3780232]	-	29	28	34	28	24	11	20	20	13	22	0.455086	0.442909	0.481672	0.448176	0.403422	0.179582	0.323786	0.328391	0.224939	0.355825
ENSMUSG00000106734	34.6059	41.1982	38.6727	18.8029	38.4858	69.1525	48.2889	34.4989	55.0793	40.3151	-0.524113	0.0352952	0.879496	Gm20559	6	3333194	3346128	-	4690	processed_transcript	predicted gene, 20559 [Source:MGI Symbol;Acc:MGI:5295666]	-	36	42	44	19	37	68	48	34	51	40	0.332095	0.390543	0.366428	0.178776	0.365607	0.652592	0.456807	0.328173	0.518748	0.38031
ENSMUSG00000092522	2.88382	1.96182	2.63677	7.91703	5.20079	2.0339	1.00602	0	2.15997	0	1.99439	0.0359145	1	Gm20389	3	154708658	154711343	-	1006	antisense	predicted gene 20389 [Source:MGI Symbol;Acc:MGI:5141854]	-	3	2	3	8	5	2	1	0	2	0	0.12902	0.0867012	0.116475	0.350929	0.230334	0.0894825	0.0443677	0	0.0948399	0
ENSMUSG00000110218	69.2117	89.2627	92.2871	70.2636	87.3733	61.0169	59.355	64.939	61.5592	62.4884	0.401724	0.0102976	0.644933	Gm20219	17	56551414	56554387	-	1269	protein_coding	predicted gene, 20219 [Source:MGI Symbol;Acc:MGI:5012404]	-	72	91	105	71	84	60	59	64	57	62	2.45473	3.12732	3.23174	2.46902	3.06763	2.12812	2.07518	2.28305	2.14275	2.17862
ENSMUSG00000113604	0	0.980909	0	0.989629	0	10.1695	4.02407	5.07336	1.07999	0	-3.36146	0.00968659	1	Gm19786	12	18559615	18565108	+	580	unprocessed_pseudogene	predicted gene, 19786 [Source:MGI Symbol;Acc:MGI:5011971]	-	0	1	0	1	0	10	4	5	1	0	0	0.0751908	0	0.0760851	0	0.776029	0.30782	0.390247	0.0822491	0
ENSMUSG00000113318	3.84509	2.94273	1.75785	8.90666	4.16063	3.05085	1.00602	0	0	1.00788	2.0756	0.0305816	1	Gm18113	12	69369514	69370023	-	303	processed_pseudogene	predicted gene, 18113 [Source:MGI Symbol;Acc:MGI:5010298]	-	4	3	2	9	4	3	1	0	0	1	0.57115	0.431789	0.257808	1.31077	0.61179	0.44564	0.147307	0	0	0.147166
ENSMUSG00000115856	16.3417	32.37	36.9148	25.7303	27.0441	15.2542	17.1023	15.2201	18.3598	7.05514	0.928485	0.00383757	0.486127	Gm18095	15	99880199	99881216	+	746	processed_pseudogene	predicted gene, 18095 [Source:MGI Symbol;Acc:MGI:5010280]	-	17	33	42	26	26	15	17	15	17	7	0.985922	1.92916	2.19897	1.53802	1.61518	0.90502	1.01713	0.910227	1.0871	0.418418
ENSMUSG00000103444	0	0	0	0	0	4.06779	0	3.04402	1.07999	2.01575	-3.51946	0.022613	1	Gm17836	3	75391319	75392620	+	1302	processed_pseudogene	predicted gene, 17836 [Source:MGI Symbol;Acc:MGI:5010021]	-	0	0	0	0	0	4	0	3	1	2	0	0	0	0	0	0.138279	0	0.104306	0.0366394	0.0684967
ENSMUSG00000105093	0	0	0	0	1.04016	0	4.02407	4.05869	3.23996	0	-3.0891	0.045087	1	Gm17815	3	95804855	95805749	+	895	processed_pseudogene	predicted gene, 17815 [Source:MGI Symbol;Acc:MGI:5010000]	-	0	0	0	0	1	0	4	4	3	0	0	0	0	0	0.05178	0	0.199481	0.202318	0.159903	0
ENSMUSG00000104841	1.92255	2.94273	9.66817	5.93777	3.12047	1.01695	4.02407	1.01467	0	1.00788	1.73693	0.046758	1	Gm17743	3	144779012	144780686	+	1675	processed_pseudogene	predicted gene, 17743 [Source:MGI Symbol;Acc:MGI:5009819]	-	2	3	11	6	3	1	4	1	0	1	0.0516592	0.0781087	0.2565	0.158075	0.0830026	0.0268714	0.106588	0.027026	0	0.0266217
ENSMUSG00000102997	49.9862	43.16	47.4619	52.4503	35.3654	30.5085	37.2227	34.4989	21.5997	39.3072	0.484314	0.0270831	0.845499	Gm17244	4	123113349	123116764	-	3416	TEC	predicted gene, 17244 [Source:MGI Symbol;Acc:MGI:4936878]	-	52	44	54	53	34	30	37	34	20	39	0.658594	0.56173	0.617426	0.684677	0.461261	0.395284	0.483447	0.450566	0.2793	0.509093
ENSMUSG00000061115	0.961274	0	0	0	0	0	1.00602	3.04402	3.23996	3.02363	-2.95311	0.0402515	1	Gm17113	7	29183036	29183383	+	171	processed_pseudogene	predicted gene 17113 [Source:MGI Symbol;Acc:MGI:4937940]	-	1	0	0	0	0	0	1	3	3	3	0.253009	0	0	0	0	0	0.261017	0.794187	0.83692	0.782304
ENSMUSG00000097242	30.7608	35.3127	39.5516	38.5955	43.6866	33.5593	25.1504	34.4989	21.5997	21.1654	0.46423	0.0492965	0.925979	Gm16907	13	63289601	63297147	-	2317	lincRNA	predicted gene, 16907 [Source:MGI Symbol;Acc:MGI:4439831]	-	32	36	45	39	42	33	25	34	20	21	0.597526	0.677594	0.758569	0.74279	0.840057	0.641053	0.481591	0.664279	0.411778	0.404151
ENSMUSG00000090081	0.961274	6.86636	7.0314	0	5.20079	1.01695	0	1.01467	0	1.00788	2.71522	0.0235431	1	Gm16587	1	164143432	164146366	-	863	antisense	predicted gene 16587 [Source:MGI Symbol;Acc:MGI:4415007]	-	1	7	8	0	5	1	0	1	0	1	0.0501328	0.353737	0.362066	0	0.2685	0.0521549	0	0.052455	0	0.0516702
ENSMUSG00000086593	3.84509	5.88545	6.15247	1.97926	6.24095	0	2.01204	0	0	2.01575	2.56376	0.00884223	1	Gm16548	1	164148591	164152217	-	1226	lincRNA	predicted gene 16548 [Source:MGI Symbol;Acc:MGI:4414968]	-	4	6	7	2	6	0	2	0	0	2	0.141157	0.213429	0.223006	0.0719892	0.226802	0	0.0728122	0	0	0.0727428
ENSMUSG00000082123	0	2.94273	0	2.96889	6.24095	1.01695	0	0	0	0	3.09919	0.0458523	1	Gm16149	10	3869299	3869607	-	309	processed_pseudogene	predicted gene 16149 [Source:MGI Symbol;Acc:MGI:3801828]	-	0	3	0	3	6	1	0	0	0	0	0	0.423405	0	0.42844	0.899867	0.145662	0	0	0	0
ENSMUSG00000086248	6.72892	1.96182	7.0314	9.89629	7.28111	14.2373	14.0842	8.11738	7.5599	23.1812	-1.03343	0.0286682	0.845499	Gm16127	9	95636972	95638265	-	234	processed_transcript	predicted gene 16127 [Source:MGI Symbol;Acc:MGI:3802173]	-	7	2	8	10	7	14	14	8	7	23	1.29424	0.372741	1.33531	1.88587	1.38633	2.69289	2.6704	1.54765	1.42706	4.38291
ENSMUSG00000090026	7.69019	6.86636	5.27355	4.94814	4.16063	14.2373	5.03009	14.2054	11.8798	10.0788	-0.934047	0.0431647	1	Gm15996	12	111730094	111731831	-	762	antisense	predicted gene 15996 [Source:MGI Symbol;Acc:MGI:3802107]	-	8	7	6	5	4	14	5	14	11	10	0.454221	0.400623	0.307542	0.289563	0.243271	0.826949	0.292873	0.831707	0.688647	0.585188
ENSMUSG00000090087	4.80637	2.94273	2.63677	5.93777	2.08032	0	1.00602	2.02934	1.07999	0	2.1651	0.0313101	1	Gm15939	10	33624246	33662432	+	2147	antisense	predicted gene 15939 [Source:MGI Symbol;Acc:MGI:3801831]	-	5	3	3	6	2	0	1	2	1	0	0.100756	0.0609371	0.0545755	0.123324	0.0431701	0	0.020789	0.0421692	0.0222191	0
ENSMUSG00000084904	337.407	347.242	384.09	366.163	355.734	304.068	317.902	343.974	235.437	297.324	0.256038	0.00700263	0.563875	Gm14827	X	94442732	94447727	+	3089	lincRNA	predicted gene 14827 [Source:MGI Symbol;Acc:MGI:3705192]	-	351	354	437	370	342	299	316	339	218	295	4.91611	4.99779	5.52551	5.28581	5.1309	4.35672	4.56598	4.96797	3.36665	4.25848
ENSMUSG00000078902	61.5215	41.1982	45.7041	39.5852	54.0882	67.1186	68.4092	55.807	53.9993	65.512	-0.362552	0.048842	0.925868	Gm14443	2	175166255	175175871	-	4859	protein_coding	predicted gene 14443 [Source:MGI Symbol;Acc:MGI:3652324]	zf-C2H2	64	42	52	40	52	66	68	55	50	65	0.569857	0.37696	0.417989	0.363279	0.495954	0.611368	0.624636	0.512405	0.490888	0.596509
ENSMUSG00000085938	0.961274	0	0	0	0	0	2.01204	4.05869	2.15997	2.01575	-2.94645	0.0391063	1	Gm14371	2	173793437	173847670	-	1518	unprocessed_pseudogene	predicted gene 14371 [Source:MGI Symbol;Acc:MGI:3651566]	-	1	0	0	0	0	0	2	4	2	2	0.028501	0	0	0	0	0	0.0588062	0.119285	0.0628517	0.0587501
ENSMUSG00000085914	12.4966	15.6945	16.6996	12.8652	7.28111	6.10169	3.01805	9.13205	11.8798	3.02363	0.98629	0.0327876	0.860175	Gm14320	2	167662109	167667697	+	1023	antisense	predicted gene 14320 [Source:MGI Symbol;Acc:MGI:3649455]	-	13	16	19	13	7	6	3	9	11	3	0.549794	0.682083	0.725415	0.560784	0.317108	0.263986	0.130891	0.398258	0.512951	0.130766
ENSMUSG00000081344	17.3029	14.7136	9.66817	14.8444	13.5221	18.3051	25.1504	13.1907	23.7597	34.2678	-0.715178	0.030283	0.856052	Gm14303	2	172509521	172509691	-	171	processed_pseudogene	predicted gene 14303 [Source:MGI Symbol;Acc:MGI:3651379]	-	18	15	11	15	13	18	25	13	22	34	4.55417	3.8255	2.5125	3.871	3.52316	4.73786	6.52542	3.44147	6.13742	8.86612
ENSMUSG00000082920	0	0	0.878925	0	0	3.05085	1.00602	6.08803	1.07999	2.01575	-3.319	0.0121636	1	Gm13864	6	34786679	34787463	+	785	processed_pseudogene	predicted gene 13864 [Source:MGI Symbol;Acc:MGI:3651491]	-	0	0	1	0	0	3	1	6	1	2	0	0	0.0497553	0	0	0.172012	0.0568584	0.346002	0.06077	0.113609
ENSMUSG00000085182	2.88382	0	3.5157	3.95852	3.12047	0	0	1.01467	0	0	3.26263	0.0146145	1	Gm13596	2	68476082	68477752	+	292	antisense	predicted gene 13596 [Source:MGI Symbol;Acc:MGI:3651140]	-	3	0	4	4	3	0	0	1	0	0	0.444499	0	0.53504	0.604512	0.476128	0	0	0.15503	0	0
ENSMUSG00000082357	12.4966	13.7327	10.5471	10.8859	7.28111	9.15254	4.02407	1.01467	5.39993	5.03938	1.16106	0.0193312	1	Gm13542	2	25994547	25995183	-	637	processed_pseudogene	predicted gene 13542 [Source:MGI Symbol;Acc:MGI:3649446]	-	13	14	12	11	7	9	4	1	5	5	0.882951	0.958476	0.735785	0.762045	0.509265	0.63593	0.280276	0.0710654	0.374446	0.350011
ENSMUSG00000086447	2.88382	1.96182	0.878925	6.9274	3.12047	0	0	1.01467	1.07999	1.00788	2.34729	0.0417077	1	Gm13522	2	52367063	52390307	+	1276	antisense	predicted gene 13522 [Source:MGI Symbol;Acc:MGI:3651428]	-	3	2	1	7	3	0	0	1	1	1	0.101719	0.0683553	0.0306096	0.242089	0.108957	0	0	0.035477	0.0373859	0.0349462
ENSMUSG00000085224	36.5284	29.4273	36.9148	57.3985	54.0882	27.4576	10.0602	38.5575	31.3196	28.2205	0.659495	0.0267782	0.845499	Gm13425	2	31633453	31640589	-	5391	antisense	predicted gene 13425 [Source:MGI Symbol;Acc:MGI:3649915]	-	38	30	42	58	52	27	10	38	29	28	0.304963	0.242686	0.304291	0.474773	0.447012	0.225424	0.0827933	0.319089	0.256618	0.2316
ENSMUSG00000078238	14.4191	15.6945	18.4574	7.91703	14.5622	35.5932	27.1625	21.3081	15.1198	25.1969	-0.80544	0.012818	0.702888	Gm12854	4	116067268	116067564	+	297	processed_pseudogene	predicted gene 12854 [Source:MGI Symbol;Acc:MGI:3650410]	-	15	16	21	8	14	35	27	21	14	25	2.18508	2.3494	2.76167	1.18867	2.18452	5.30417	4.05763	3.20081	2.24869	3.75348
ENSMUSG00000085181	66.3279	66.7018	64.1615	73.2325	61.3693	80.3389	111.668	90.3058	110.159	71.5592	-0.482752	0.00295041	0.447299	Gm12709	4	102967266	102989755	-	1912	antisense	predicted gene 12709 [Source:MGI Symbol;Acc:MGI:3651946]	-	69	68	73	74	59	79	111	89	102	71	1.56133	1.55101	1.49123	1.70794	1.43004	1.85971	2.59119	2.10717	2.5449	1.65585
ENSMUSG00000060727	13.4578	10.79	8.78925	11.8755	4.16063	3.05085	6.03611	3.04402	5.39993	6.04726	1.06138	0.0363906	1	Gm12571	11	78149196	78149438	-	243	processed_pseudogene	predicted gene 12571 [Source:MGI Symbol;Acc:MGI:3649675]	-	14	11	10	12	4	3	6	3	5	6	2.49261	1.97415	1.60732	2.17923	0.76285	0.555675	1.10207	0.558872	0.981573	1.10102
ENSMUSG00000085192	1.92255	1.96182	7.0314	2.96889	1.04016	0	0	0	0	0	3.99796	0.00262047	1	Gm12195	11	50134082	50135004	-	469	antisense	predicted gene 12195 [Source:MGI Symbol;Acc:MGI:3651100]	-	2	2	8	3	1	0	0	0	0	0	0.184497	0.185973	0.666233	0.282277	0.0988126	0	0	0	0	0
ENSMUSG00000087501	20.1867	12.7518	17.5785	9.89629	17.6827	24.4068	33.1986	22.3228	23.7597	16.126	-0.615493	0.0470699	0.916309	Gm12116	11	33204055	33221477	+	2770	lincRNA	predicted gene 12116 [Source:MGI Symbol;Acc:MGI:3652289]	-	21	13	20	10	17	24	33	22	22	16	0.327999	0.204671	0.282006	0.159312	0.284416	0.389976	0.531739	0.359534	0.37888	0.257567
ENSMUSG00000086765	3.84509	4.90454	11.426	5.93777	2.08032	0	0	2.02934	0	5.03938	1.99353	0.0290803	1	Gm11827	4	11122805	11126998	+	1368	lincRNA	predicted gene 11827 [Source:MGI Symbol;Acc:MGI:3649801]	-	4	5	13	6	2	0	0	2	0	5	0.126505	0.159396	0.371164	0.19355	0.0677531	0	0	0.0661822	0	0.16298
ENSMUSG00000085501	20.1867	11.7709	7.0314	7.91703	5.20079	16.2712	18.1083	25.3668	19.4397	12.0945	-0.806305	0.0420061	0.905032	Gm11772	11	120235234	120236122	-	532	antisense	predicted gene 11772 [Source:MGI Symbol;Acc:MGI:3649468]	-	21	12	8	8	5	16	18	25	18	12	1.70781	0.9837	0.587337	0.663599	0.435556	1.35367	1.51017	2.12729	1.61406	1.00582
ENSMUSG00000086152	31.722	39.2363	37.7938	33.6474	45.7669	27.4576	28.1685	15.2201	26.9997	17.1339	0.71067	0.00465307	0.486127	Gm11454	2	163122606	163143959	+	714	lincRNA	predicted gene 11454 [Source:MGI Symbol;Acc:MGI:3650530]	-	33	40	43	34	44	27	28	15	25	17	1.99962	2.44318	2.35223	2.1014	2.85588	1.70205	1.75035	0.951022	1.67032	1.0617
ENSMUSG00000083767	0	0	0	0	0	3.05085	2.01204	0	1.07999	2.01575	-3.19661	0.0482314	1	Gm11405	4	74228197	74229752	+	1556	processed_pseudogene	predicted gene 11405 [Source:MGI Symbol;Acc:MGI:3651226]	-	0	0	0	0	0	3	2	0	1	2	0	0	0	0	0	0.0867796	0.05737	0	0.0306584	0.0573154
ENSMUSG00000074461	155.726	150.079	147.659	148.444	156.024	113.898	133.8	144.083	120.958	108.851	0.285395	0.0131102	0.708276	Gm10699	8	14090461	14092590	+	2130	TEC	predicted gene 10699 [Source:MGI Symbol;Acc:MGI:3642530]	-	162	153	168	150	150	112	133	142	112	108	3.29055	3.1326	3.08062	3.1077	3.2636	2.36671	2.787	3.01791	2.5084	2.26097
ENSMUSG00000097430	8.65146	15.6945	14.9417	16.8237	15.6024	7.11864	12.0722	6.08803	7.5599	7.05514	0.843614	0.0330651	0.860175	Gm10544	18	37159854	37178522	-	5051	processed_transcript	predicted gene 10544 [Source:MGI Symbol;Acc:MGI:3642892]	-	9	16	17	17	15	7	12	6	7	7	0.0770899	0.138145	0.131456	0.148525	0.137626	0.0623773	0.10604	0.0537739	0.0661119	0.0617976
ENSMUSG00000117286	624.828	636.61	608.216	707.585	738.512	583.728	604.617	568.216	537.833	612.789	0.188045	0.00855623	0.618413	Gm1043	5	37085370	37229547	+	13507	protein_coding	predicted 1043 [Source:NCBI gene;Acc:381634]	-	650	649	692	715	710	574	601	560	498	608	2.08203	2.09546	2.00104	2.33601	2.43604	1.91275	1.986	1.87684	1.75885	2.00722
ENSMUSG00000084838	3.84509	6.86636	5.27355	4.94814	5.20079	10.1695	8.04814	15.2201	14.0398	8.06301	-1.08565	0.01882	1	Gm10241	16	20176727	20177012	-	286	processed_pseudogene	predicted pseudogene 10241 [Source:MGI Symbol;Acc:MGI:3704461]	-	4	7	6	5	5	10	8	15	13	8	0.605099	1.06739	0.819396	0.771492	0.810195	1.57376	1.2485	2.37423	2.16838	1.24731
ENSMUSG00000058927	13.4578	13.7327	10.5471	13.8548	14.5622	18.3051	17.1023	20.2934	18.3598	28.2205	-0.634313	0.0430497	0.905032	Gm10053	19	24875686	24876634	+	949	protein_coding	predicted gene 10053 [Source:MGI Symbol;Acc:MGI:3704493]	-	14	14	12	14	14	18	17	20	17	28	0.638255	0.643361	0.493883	0.651013	0.683671	0.853714	0.799553	0.954028	0.854558	1.31566
ENSMUSG00000058246	102.856	101.034	105.471	106.88	107.136	78.305	100.602	86.2471	71.2791	92.7247	0.284334	0.0364269	0.885095	Gm10037	13	67831106	67844035	+	1193	protein_coding	predicted gene 10037 [Source:MGI Symbol;Acc:MGI:3645096]	-	107	103	120	108	103	77	100	85	66	92	3.88039	3.76521	3.92871	3.99495	4.00112	2.90507	3.74131	3.22534	2.63914	3.43873
ENSMUSG00000011884	731.529	640.533	585.364	643.259	561.685	926.44	740.429	715.344	772.19	728.695	-0.29608	0.000756542	0.230719	Gltp	5	114669398	114690984	-	1762	protein_coding	glycolipid transfer protein [Source:MGI Symbol;Acc:MGI:1929253]	-	761	653	666	650	540	911	736	705	715	723	18.6858	16.1622	14.7631	16.2793	14.2028	23.2712	18.6439	18.1126	19.3579	18.2971
ENSMUSG00000024027	77.8632	84.3581	115.139	77.191	105.056	70.1694	65.3912	67.983	88.5589	70.5514	0.345272	0.0357593	0.883787	Glp1r	17	30901867	30936510	+	1480	protein_coding	glucagon-like peptide 1 receptor [Source:MGI Symbol;Acc:MGI:99571]	-	81	86	131	78	101	69	65	67	82	70	2.36786	2.53413	3.45715	2.32574	3.16261	2.09842	1.96027	2.04932	2.64308	2.10905
ENSMUSG00000028480	111.508	119.671	113.381	106.88	157.064	95.5932	82.4935	57.8363	93.9588	120.945	0.431164	0.0146747	0.722636	Glipr2	4	43957401	43979118	+	2320	protein_coding	GLI pathogenesis-related 2 [Source:MGI Symbol;Acc:MGI:1917770]	-	116	122	129	108	151	94	82	57	87	120	2.16323	2.29332	2.17175	2.0543	3.0163	1.82367	1.57758	1.1122	1.78892	2.30645
ENSMUSG00000030048	20.1867	18.6373	5.27355	22.7615	7.28111	24.4068	34.2046	13.1907	24.8397	29.2284	-0.767576	0.048004	0.921416	Gkn3	6	87383256	87388935	-	856	protein_coding	gastrokine 3 [Source:MGI Symbol;Acc:MGI:1916138]	-	21	19	6	23	7	24	34	13	23	29	1.0614	0.967994	0.27377	1.18572	0.378974	1.26195	1.77284	0.687491	1.28178	1.51069
ENSMUSG00000043448	446.992	548.328	401.669	512.628	394.22	697.627	619.707	580.393	613.432	535.183	-0.403307	5.8544e-05	0.0782823	Gjc2	11	59175568	59183213	-	2250	protein_coding	gap junction protein, gamma 2 [Source:MGI Symbol;Acc:MGI:2153060]	-	465	559	457	518	379	686	616	572	568	531	8.94135	10.8348	7.93309	10.1596	7.80624	13.723	12.2198	11.5083	12.0427	10.5236
ENSMUSG00000047797	322.988	378.631	300.592	275.117	277.722	469.83	416.491	379.487	411.475	334.615	-0.371164	0.000587208	0.217179	Gjb1	X	101376378	101385629	+	1707	protein_coding	gap junction protein, beta 1 [Source:MGI Symbol;Acc:MGI:95719]	-	336	386	342	278	267	462	414	374	381	332	8.51605	9.86158	7.82531	7.18685	7.24875	12.1819	10.8251	9.91826	10.6476	8.67272
ENSMUSG00000050953	3804.72	3866.74	3655.45	3949.61	3423.16	4171.52	3967.73	4041.44	3954.91	3876.29	-0.0977785	0.0321506	0.858484	Gja1	10	56377330	56402513	+	10257	protein_coding	gap junction protein, alpha 1 [Source:MGI Symbol;Acc:MGI:95713]	-	3958	3942	4159	3991	3291	4102	3944	3983	3662	3846	16.6951	16.7606	15.8372	17.1707	14.8694	18.0004	17.1625	17.5787	17.0317	16.7201
ENSMUSG00000051136	102.856	70.6254	94.045	79.1703	92.5741	50.8474	55.331	58.851	74.519	76.5986	0.476682	0.00509709	0.508839	Ghsr	3	27371351	27378010	+	4433	protein_coding	growth hormone secretagogue receptor [Source:MGI Symbol;Acc:MGI:2441906]	-	107	72	107	80	89	50	55	58	69	76	1.04428	0.708317	0.942746	0.796379	0.930417	0.507666	0.55377	0.592281	0.742524	0.764481
ENSMUSG00000028268	83.6308	56.8927	30.7624	58.3881	56.1685	95.5932	65.3912	73.0564	89.6388	63.4962	-0.440055	0.048579	0.924604	Gbp3	3	142560026	142573209	+	3265	protein_coding	guanylate binding protein 3 [Source:MGI Symbol;Acc:MGI:1926263]	-	87	58	35	59	54	94	65	72	83	63	1.15284	0.774707	0.418691	0.797437	0.766471	1.29584	0.888577	0.998267	1.2127	0.860415
ENSMUSG00000027199	2438.75	2627.85	2379.25	2554.23	2288.35	2955.25	2865.14	2631.05	2768	2629.55	-0.172465	0.000946638	0.251512	Gatm	2	122594467	122611303	-	3001	protein_coding	glycine amidinotransferase (L-arginine:glycine amidinotransferase) [Source:MGI Symbol;Acc:MGI:1914342]	-	2537	2679	2707	2581	2200	2906	2848	2593	2563	2609	36.5752	38.9314	35.2315	37.9533	33.9736	43.5848	42.3583	39.1142	40.7419	38.7667
ENSMUSG00000049721	215.325	248.17	233.794	206.832	203.871	292.881	277.661	222.213	261.357	235.843	-0.218209	0.0323575	0.858733	Gal3st1	11	3983636	3999326	+	2041	protein_coding	galactose-3-O-sulfotransferase 1 [Source:MGI Symbol;Acc:MGI:1858277]	-	224	253	266	209	196	288	276	219	242	234	4.74829	5.40593	5.09035	4.51888	4.45039	6.35119	6.03574	4.85734	5.65629	5.11238
ENSMUSG00000031344	1662.04	1259.49	1692.81	1682.37	1893.09	1152.2	1306.82	1536.21	1496.86	1603.53	0.206865	0.0450509	0.913792	Gabrq	X	72825178	72842602	+	5352	protein_coding	gamma-aminobutyric acid (GABA) A receptor, subunit theta [Source:MGI Symbol;Acc:MGI:1888498]	-	1729	1284	1926	1700	1820	1133	1299	1514	1386	1591	13.9769	10.4627	14.0556	14.0172	15.7594	9.52839	10.8332	12.8058	12.354	13.2558
ENSMUSG00000033676	2939.58	3081.03	3217.74	3302.39	3502.21	2891.18	2952.66	3178.97	2952.68	2934.94	0.105408	0.0429744	0.905032	Gabrb3	7	57419692	57828802	+	6542	protein_coding	gamma-aminobutyric acid (GABA) A receptor, subunit beta 3 [Source:MGI Symbol;Acc:MGI:95621]	-	3058	3141	3661	3337	3367	2843	2935	3133	2734	2912	20.2236	20.9387	21.8574	22.5099	23.8516	19.5602	20.0245	21.6794	19.9364	19.8487
ENSMUSG00000029212	2289.75	2529.76	2707.97	2666.06	2682.57	2366.44	2526.11	2404.77	2333.85	2330.21	0.106257	0.044747	0.913452	Gabrb1	5	71658113	72149037	+	13838	protein_coding	gamma-aminobutyric acid (GABA) A receptor, subunit beta 1 [Source:MGI Symbol;Acc:MGI:95619]	-	2382	2579	3081	2694	2579	2327	2511	2370	2161	2312	7.44734	8.12776	8.69615	8.59116	8.63701	7.56883	8.09912	7.75305	7.44973	7.45015
ENSMUSG00000000560	1181.41	1134.91	1338.6	1238.03	1381.33	1098.3	1168.99	1197.31	1130.75	1099.59	0.139736	0.0247788	0.845499	Gabra2	5	70957597	71095849	-	7640	protein_coding	gamma-aminobutyric acid (GABA) A receptor, subunit alpha 2 [Source:MGI Symbol;Acc:MGI:95614]	-	1229	1157	1523	1251	1328	1080	1162	1180	1047	1091	6.95971	6.60439	7.78602	7.22589	8.05545	6.36262	6.78856	6.99175	6.53751	6.36769
ENSMUSG00000036587	10.574	11.7709	5.27355	9.89629	6.24095	2.0339	4.02407	6.08803	6.47992	1.00788	1.16107	0.0385005	1	Fut7	2	25423267	25426374	+	2355	protein_coding	fucosyltransferase 7 [Source:MGI Symbol;Acc:MGI:107692]	-	11	12	6	10	6	2	4	6	6	1	0.202085	0.22222	0.0995106	0.187386	0.118072	0.0382248	0.0758113	0.115334	0.12154	0.0189348
ENSMUSG00000030795	6865.42	6130.68	6199.06	6761.14	6474.98	7231.52	7032.06	7062.12	6595.47	6863.64	-0.1012	0.0217778	0.819599	Fus	7	127967457	127985701	+	11695	protein_coding	fused in sarcoma [Source:MGI Symbol;Acc:MGI:1353633]	-	7142	6250	7053	6832	6225	7111	6990	6960	6107	6810	26.4212	23.3063	23.555	25.7795	24.6675	27.3676	26.6773	26.9405	24.9107	25.9656
ENSMUSG00000030064	304.724	420.81	391.122	325.588	322.449	493.22	421.521	405.869	384.475	353.765	-0.221768	0.041958	0.905032	Frmd4b	6	97286867	97617541	-	14302	protein_coding	FERM domain containing 4B [Source:MGI Symbol;Acc:MGI:2141794]	-	317	429	445	329	310	485	419	400	356	351	0.958948	1.30814	1.21527	1.01514	1.0045	1.52634	1.30762	1.26608	1.18744	1.09436
ENSMUSG00000084929	6.72892	1.96182	2.63677	0	6.24095	4.06779	10.0602	12.1761	16.1998	11.0866	-1.61343	0.00729029	1	Foxo6os	4	120291350	120303892	+	2291	antisense	forkhead box O6, opposite strand [Source:MGI Symbol;Acc:MGI:3028036]	-	7	2	3	0	6	4	10	12	15	11	0.132192	0.0380713	0.0511452	0	0.12137	0.0785852	0.194823	0.237112	0.312338	0.214101
ENSMUSG00000033837	0	0	0	0.989629	0	0	6.03611	1.01467	3.23996	2.01575	-3.21039	0.0244539	1	Foxh1	15	76668225	76669948	-	1365	protein_coding	forkhead box H1 [Source:MGI Symbol;Acc:MGI:1347465]	Fork	0	0	0	1	0	0	6	1	3	2	0	0	0	0.0323292	0	0	0.196193	0.0331638	0.104845	0.0653353
ENSMUSG00000023008	351.826	316.833	304.987	328.557	295.405	390.508	404.419	337.886	354.235	332.599	-0.18779	0.027175	0.845499	Fmnl3	15	99317225	99370482	-	5021	protein_coding	formin-like 3 [Source:MGI Symbol;Acc:MGI:109569]	-	366	323	347	332	284	384	402	333	328	330	3.15372	2.80547	2.69928	2.91793	2.62128	3.44229	3.57356	3.00228	3.11632	2.93072
ENSMUSG00000059714	2600.25	2202.14	2221.04	2299.9	2306.03	2449.83	2528.12	2480.87	2667.57	2560.01	-0.125465	0.0164036	0.768569	Flot1	17	35823230	35832791	+	2893	protein_coding	flotillin 1 [Source:MGI Symbol;Acc:MGI:1100500]	-	2705	2245	2527	2324	2217	2409	2513	2445	2470	2540	40.4531	33.8424	34.1166	35.4499	35.5142	37.4795	38.7712	38.2585	40.7293	39.1504
ENSMUSG00000075012	814.199	811.211	669.741	741.232	566.886	804.406	849.079	795.503	827.269	881.892	-0.206357	0.0199959	0.815612	Fjx1	2	102449366	102452499	-	3134	protein_coding	four jointed box 1 [Source:MGI Symbol;Acc:MGI:1341907]	-	847	827	762	749	545	791	844	784	766	875	11.6928	11.508	9.49653	10.5465	8.05903	11.3601	12.0201	11.3244	11.6597	12.4497
ENSMUSG00000019054	1885.06	1687.16	1808.83	1826.85	1800.51	1951.52	1851.07	1958.32	2032.53	1899.85	-0.105414	0.0206872	0.819153	Fis1	5	136953275	136966234	+	1714	protein_coding	fission, mitochondrial 1 [Source:MGI Symbol;Acc:MGI:1913687]	-	1961	1720	2058	1846	1731	1919	1840	1930	1882	1885	49.4993	43.7633	46.8968	47.5279	46.8028	50.393	47.915	50.9734	52.3803	49.0401
ENSMUSG00000053334	409.503	361.955	419.247	370.121	399.421	337.627	292.751	404.854	331.556	334.615	0.204866	0.022705	0.83144	Ficd	5	113735803	113740600	+	3133	protein_coding	FIC domain containing [Source:MGI Symbol;Acc:MGI:1098550]	-	426	369	477	374	384	332	291	399	307	332	5.88277	5.1364	5.94657	5.26792	5.6801	4.76962	4.14569	5.76514	4.67452	4.72529
ENSMUSG00000030849	988.189	983.851	856.952	1037.13	851.889	1181.69	1160.94	1091.79	992.507	1020.98	-0.207938	0.00448931	0.486127	Fgfr2	7	130162451	133123350	-	10328	protein_coding	fibroblast growth factor receptor 2 [Source:MGI Symbol;Acc:MGI:95523]	-	1028	1003	975	1048	819	1162	1154	1076	919	1013	4.30635	4.23524	3.6872	4.47788	3.67496	5.06402	4.98717	4.71621	4.24481	4.37365
ENSMUSG00000022788	362.4	342.337	401.669	424.551	417.103	448.474	432.588	449.5	429.834	449.513	-0.182419	0.0164162	0.768569	Fgd4	16	16416917	16600549	-	17517	protein_coding	FYVE, RhoGEF and PH domain containing 4 [Source:MGI Symbol;Acc:MGI:2183747]	-	377	349	457	429	401	441	430	443	398	446	0.931138	0.868878	1.01898	1.08075	1.06089	1.13314	1.09565	1.14483	1.08388	1.13534
ENSMUSG00000037432	254.738	303.101	271.588	281.055	358.854	258.305	230.378	242.507	262.437	278.174	0.206653	0.0441547	0.910488	Fer1l5	1	36372291	36422110	+	6356	protein_coding	fer-1-like 5 (C. elegans) [Source:MGI Symbol;Acc:MGI:3616091]	-	265	309	309	284	345	254	229	239	243	276	1.80383	2.12015	1.89882	1.9718	2.51548	1.79869	1.60811	1.7022	1.82382	1.93631
ENSMUSG00000021273	1739.91	1536.1	1716.54	1895.14	1781.79	1727.8	1920.49	1961.36	1985.01	1837.36	-0.121637	0.0461293	0.916309	Fdft1	14	63145150	63179578	-	4227	protein_coding	farnesyl diphosphate farnesyl transferase 1 [Source:MGI Symbol;Acc:MGI:102706]	-	1810	1566	1953	1915	1713	1699	1909	1933	1838	1823	18.5259	16.1567	18.0459	19.9924	18.7806	18.0912	20.1576	20.7013	20.743	19.2311
ENSMUSG00000021243	177.836	152.041	148.538	145.475	130.02	174.915	192.149	162.348	194.397	176.378	-0.254054	0.0223692	0.826383	Fcf1	12	84970897	84983303	+	1117	protein_coding	FCF1 rRNA processing protein [Source:MGI Symbol;Acc:MGI:1920986]	-	185	155	169	147	125	172	191	160	180	175	7.16558	6.05162	5.90939	5.80753	5.18612	6.93077	7.63211	6.48432	7.68738	6.98611
ENSMUSG00000022358	276.847	264.845	193.363	222.666	165.385	391.525	320.92	260.771	293.756	211.654	-0.396482	0.0141013	0.716735	Fbxo32	15	58175879	58214932	-	6976	protein_coding	F-box protein 32 [Source:MGI Symbol;Acc:MGI:1914981]	-	288	270	220	225	159	385	319	257	272	210	1.78615	1.68791	1.23176	1.42332	1.05627	2.48405	2.04103	1.66772	1.86004	1.34234
ENSMUSG00000048232	2030.21	1889.23	2052.29	2116.82	2225.94	1642.37	1600.57	1981.65	1974.21	1923.03	0.177292	0.0122883	0.693529	Fbxo10	4	45034247	45084604	-	4691	protein_coding	F-box protein 10 [Source:MGI Symbol;Acc:MGI:2686937]	-	2112	1926	2335	2139	2140	1615	1591	1953	1828	1908	19.4787	17.9054	19.4415	20.1221	21.1414	15.4958	15.138	18.8467	18.5896	18.1369
ENSMUSG00000022124	1379.43	1473.32	1457.26	1459.7	1359.49	1589.49	1583.47	1564.62	1586.5	1477.55	-0.129602	0.00455076	0.486127	Fbxl3	14	103080239	103099566	-	5103	protein_coding	F-box and leucine-rich repeat protein 3 [Source:MGI Symbol;Acc:MGI:1354702]	-	1435	1502	1658	1475	1307	1563	1574	1542	1469	1466	12.1663	12.8362	12.6902	12.7554	11.8696	13.786	13.7671	13.6791	13.7327	12.8103
ENSMUSG00000021186	341.252	642.495	806.853	360.225	625.135	365.085	317.902	286.138	295.916	297.324	0.829461	0.000912861	0.247942	Fbln5	12	101746565	101819055	-	6911	protein_coding	fibulin 5 [Source:MGI Symbol;Acc:MGI:1346091]	-	355	655	918	364	601	359	316	282	274	295	2.22239	4.13327	5.18813	2.32428	4.03013	2.33808	2.04085	1.84716	1.89134	1.90341
ENSMUSG00000020776	1867.75	1816.64	1900.24	1746.69	1887.89	1727.8	1661.94	1804.09	1648.06	1740.6	0.103249	0.0216525	0.819599	Fbf1	11	116142285	116168166	-	7751	protein_coding	Fas (TNFRSF6) binding factor 1 [Source:MGI Symbol;Acc:MGI:1922033]	-	1943	1852	2162	1765	1815	1699	1652	1778	1526	1727	10.8455	10.4202	10.8945	10.0488	10.8519	9.86601	9.51299	10.3842	9.39195	9.9354
ENSMUSG00000038274	3003.02	2453.25	2595.46	2396.88	2607.68	2942.03	2646.83	2769.04	3296.12	2917.8	-0.158224	0.0249865	0.845499	Fau	19	6057888	6059524	+	815	protein_coding	Finkel-Biskis-Reilly murine sarcoma virus (FBR-MuSV) ubiquitously expressed (fox derived) [Source:MGI Symbol;Acc:MGI:102547]	-	3124	2501	2953	2422	2507	2893	2631	2729	3052	2895	165.839	133.829	141.519	131.143	142.555	159.771	144.088	151.58	178.643	158.395
ENSMUSG00000024778	42.296	38.2554	71.1929	50.4711	67.6103	38.644	19.1143	44.6456	35.6395	46.3623	0.550277	0.0301644	0.856052	Fas	19	34290659	34327770	+	1801	protein_coding	Fas (TNF receptor superfamily member 6) [Source:MGI Symbol;Acc:MGI:95484]	-	44	39	81	51	65	38	19	44	33	46	1.05699	0.944373	1.75663	1.24964	1.67257	0.949677	0.470874	1.10595	0.874096	1.13892
ENSMUSG00000028878	920.9	925.978	900.898	1020.31	953.825	1018.98	978.855	1076.57	980.627	1052.22	-0.113923	0.0376839	0.887644	Fam76a	4	132899213	132922558	-	3088	protein_coding	family with sequence similarity 76, member A [Source:MGI Symbol;Acc:MGI:2385211]	-	958	944	1025	1031	917	1002	973	1061	908	1044	13.4221	13.3318	12.9645	14.7336	13.7619	14.6048	14.0637	15.5538	14.0271	15.0756
ENSMUSG00000029672	915.133	854.371	815.642	835.247	830.046	871.525	856.121	967.997	986.027	968.57	-0.129493	0.0332642	0.860175	Fam3c	6	22306520	22356243	-	3713	protein_coding	family with sequence similarity 3, member C [Source:MGI Symbol;Acc:MGI:107892]	-	952	871	928	844	798	857	851	954	913	961	11.0929	10.2302	9.76184	10.031	9.96009	10.3887	10.2299	11.6311	11.7302	11.5412
ENSMUSG00000055865	4.80637	7.84727	3.5157	15.8341	8.32126	12.2034	10.0602	19.2788	18.3598	14.1103	-0.885501	0.0413931	0.905032	Fam19a3	3	104767406	104781840	-	4484	protein_coding	family with sequence similarity 19, member A3 [Source:MGI Symbol;Acc:MGI:3046463]	-	5	8	4	16	8	12	10	19	17	14	0.0482433	0.0778067	0.034842	0.157464	0.0826818	0.120454	0.0995403	0.191816	0.18086	0.139224
ENSMUSG00000064138	592.145	565.003	521.202	580.912	491.995	605.084	636.809	637.214	622.072	595.655	-0.170528	0.0106766	0.655797	Fam172a	13	77702033	78166235	+	8134	protein_coding	family with sequence similarity 172, member A [Source:MGI Symbol;Acc:MGI:1915925]	-	616	576	593	587	473	595	633	628	576	591	3.27649	3.08824	2.84747	3.18465	2.6949	3.29245	3.47348	3.49505	3.37814	3.23992
ENSMUSG00000034685	1628.4	1555.72	1606.67	1501.27	1662.17	1433.9	1381.26	1504.76	1477.42	1473.52	0.129654	0.00552964	0.519307	Fam171a2	11	102436981	102447682	-	3119	protein_coding	family with sequence similarity 171, member A2 [Source:MGI Symbol;Acc:MGI:2448496]	-	1694	1586	1828	1517	1598	1410	1373	1483	1368	1462	23.498	22.1759	22.8913	21.4634	23.7436	20.3474	19.6481	21.524	20.9233	20.9018
ENSMUSG00000026153	451.799	477.703	478.135	544.296	511.758	567.457	567.394	590.539	482.754	545.261	-0.161697	0.0316112	0.856052	Fam135a	1	24011093	24100341	-	7773	protein_coding	family with sequence similarity 135, member A [Source:MGI Symbol;Acc:MGI:1915437]	-	470	487	544	550	492	558	564	582	447	541	2.61602	2.73233	2.7335	3.12249	2.93334	3.23111	3.23858	3.38947	2.74333	3.10355
ENSMUSG00000014763	1490.94	1596.92	1720.06	1580.44	1729.78	1395.25	1419.49	1629.56	1508.74	1424.13	0.138202	0.0211373	0.819153	Fam120b	17	15396202	15433583	+	8345	protein_coding	family with sequence similarity 120, member B [Source:MGI Symbol;Acc:MGI:1914794]	-	1551	1628	1957	1597	1663	1372	1411	1606	1397	1413	8.04115	8.50787	9.15953	8.44513	9.23531	7.40003	7.54684	8.71197	7.98599	7.55034
ENSMUSG00000029185	145.152	140.27	122.171	134.59	127.939	161.695	145.873	170.465	149.038	151.182	-0.216816	0.0487222	0.924604	Fam114a1	5	64970071	65041886	+	2976	protein_coding	family with sequence similarity 114, member A1 [Source:MGI Symbol;Acc:MGI:1915553]	-	151	143	139	136	123	159	145	168	138	150	2.19521	2.09554	1.82428	2.01666	1.91539	2.40475	2.1747	2.55549	2.2121	2.24755
ENSMUSG00000021750	4038.31	6693.72	5617.21	4193.06	5461.87	3515.59	3921.46	3858.8	3905.23	3632.39	0.465457	0.00086843	0.242507	Fam107a	14	8296274	8318023	-	3870	protein_coding	family with sequence similarity 107, member A [Source:MGI Symbol;Acc:MGI:3041256]	-	4201	6824	6391	4237	5251	3457	3898	3803	3616	3604	46.965	76.899	64.501	48.3142	62.8806	40.2063	44.9568	44.4849	44.5735	41.5264
ENSMUSG00000024665	2483.93	2276.69	2149.85	2732.37	2209.3	2488.47	2537.18	2563.06	2792.84	2691.03	-0.141443	0.0323017	0.858733	Fads2	19	10064164	10101503	-	1508	protein_coding	fatty acid desaturase 2 [Source:MGI Symbol;Acc:MGI:1930079]	-	2584	2321	2446	2761	2124	2447	2522	2526	2586	2670	74.1351	67.1223	63.3525	80.7965	65.2737	73.0363	74.6463	75.828	81.8062	78.9515
ENSMUSG00000010663	4472.81	4296.38	3855.84	4549.32	4081.58	4704.4	4575.37	4421.94	4674.18	4705.78	-0.119021	0.0164476	0.768569	Fads1	19	10182888	10196870	+	3456	protein_coding	fatty acid desaturase 1 [Source:MGI Symbol;Acc:MGI:1923517]	-	4653	4380	4387	4597	3924	4626	4548	4358	4328	4669	58.2495	55.2705	49.5796	58.6987	52.6188	60.2473	58.7369	57.0835	59.741	60.2422
ENSMUSG00000031077	68.2504	32.37	48.3409	43.5437	52.0079	84.4067	70.4212	57.8363	63.7192	50.3938	-0.417997	0.0484514	0.924604	Fadd	7	144577318	144582463	-	3903	protein_coding	Fas (TNFRSF6)-associated via death domain [Source:MGI Symbol;Acc:MGI:109324]	-	71	33	55	44	50	83	70	57	59	50	0.787032	0.36873	0.550393	0.497487	0.593686	0.957162	0.800505	0.66111	0.721128	0.571245
ENSMUSG00000027533	1366.93	1176.11	1329.81	1261.78	1281.47	1518.3	1597.56	1463.16	1478.5	1384.82	-0.213776	0.000136052	0.131388	Fabp5	3	10012548	10016607	+	3567	protein_coding	fatty acid binding protein 5, epidermal [Source:MGI Symbol;Acc:MGI:101790]	-	1422	1199	1513	1275	1232	1493	1588	1442	1369	1374	17.2476	14.6592	16.567	15.7737	16.0064	18.8392	19.8706	18.3004	18.3088	17.1765
ENSMUSG00000085298	11.5353	4.90454	3.5157	2.96889	6.24095	3.05085	2.01204	2.02934	1.07999	2.01575	1.50976	0.0347463	1	F730035M05Rik	12	70227841	70234165	+	1296	lincRNA	RIKEN cDNA F730035M05 gene [Source:MGI Symbol;Acc:MGI:3041236]	-	12	5	4	3	6	3	2	2	1	2	0.400598	0.168251	0.120549	0.102151	0.214552	0.104189	0.0688794	0.069859	0.036809	0.0688138
ENSMUSG00000032705	1586.1	1865.69	1751.7	1714.04	1944.06	1530.51	1517.07	1699.58	1480.66	1654.93	0.168415	0.00766785	0.597109	Exd2	12	80463095	80500227	+	8337	protein_coding	exonuclease 3'-5' domain containing 2 [Source:MGI Symbol;Acc:MGI:1922485]	-	1650	1902	1993	1732	1869	1505	1508	1675	1371	1642	8.56262	9.94932	9.33698	9.16781	10.3893	8.12517	8.07339	9.09499	7.84489	8.78242
ENSMUSG00000078771	304.724	362.936	349.812	286.992	312.047	469.83	377.257	356.15	382.315	317.481	-0.234619	0.0265295	0.845499	Evi2a	11	79526560	79530609	-	2297	protein_coding	ecotropic viral integration site 2a [Source:MGI Symbol;Acc:MGI:95458]	-	317	370	398	290	300	462	375	351	354	315	5.97078	7.02479	6.76754	5.5714	6.05265	9.05288	7.28677	6.91741	7.35193	6.11505
ENSMUSG00000070354	0	0	0	0	0	1.01695	1.00602	2.02934	2.15997	2.01575	-3.20526	0.0311925	1	Evi2	11	79513385	79530589	-	3944	protein_coding	ecotropic viral integration site 2 [Source:MGI Symbol;Acc:MGI:5439444]	-	0	0	0	0	0	1	1	2	2	2	0	0	0	0	0	0.0114122	0.0113169	0.0229557	0.0241909	0.0226122
ENSMUSG00000013089	912.249	1205.54	1023.07	829.309	959.026	774.915	768.598	800.576	795.95	821.42	0.315514	0.000207839	0.158493	Etv5	16	22381309	22439719	-	4103	protein_coding	ets variant 5 [Source:MGI Symbol;Acc:MGI:1096867]	ETS	949	1229	1164	838	922	762	764	789	737	815	10.0068	13.063	11.0805	9.01301	10.4139	8.3591	8.31106	8.70508	8.5689	8.85741
ENSMUSG00000019232	1674.54	1966.72	1745.54	1579.45	1789.07	1656.61	1481.86	1601.15	1559.5	1547.09	0.158115	0.00907823	0.628017	Etnppl	3	130617448	130637521	+	8262	protein_coding	ethanolamine phosphate phospholyase [Source:MGI Symbol;Acc:MGI:1919010]	-	1742	2005	1986	1596	1720	1629	1473	1578	1444	1535	9.12211	10.5833	9.38864	8.52462	9.64781	8.87446	7.9576	8.64608	8.3376	8.28464
ENSMUSG00000027809	550.81	594.431	602.063	497.783	515.918	480	479.87	483.999	515.153	497.891	0.169878	0.0171608	0.774253	Etfdh	3	79603788	79629500	-	7505	protein_coding	electron transferring flavoprotein, dehydrogenase [Source:MGI Symbol;Acc:MGI:106100]	-	573	606	685	503	496	472	477	477	477	494	3.30321	3.5214	3.56491	2.95764	3.06278	2.83072	2.83682	2.87717	3.03198	2.93513
ENSMUSG00000037681	620.022	446.313	635.463	534.4	611.613	409.83	493.955	492.116	506.513	470.678	0.263723	0.00705741	0.563875	Esyt3	9	99309963	99358557	-	7138	protein_coding	extended synaptotagmin-like protein 3 [Source:MGI Symbol;Acc:MGI:1098699]	-	645	455	723	540	588	403	491	485	469	467	3.90945	2.77989	3.95613	3.33845	3.81756	2.54117	3.07022	3.07583	3.13441	2.91737
ENSMUSG00000021055	22.1093	17.6564	20.2153	27.7096	22.8835	18.3051	8.04814	15.2201	5.39993	21.1654	0.69223	0.0480241	0.921416	Esr2	12	76120419	76177259	-	3368	protein_coding	estrogen receptor 2 (beta) [Source:MGI Symbol;Acc:MGI:109392]	ESR-like	23	18	23	28	22	18	8	15	5	21	0.295453	0.233074	0.266726	0.366871	0.302716	0.240551	0.106019	0.201612	0.0708202	0.278034
ENSMUSG00000020715	462.373	376.669	454.404	447.312	474.312	329.491	403.413	410.942	353.155	448.505	0.186642	0.0478642	0.921416	Ern1	11	106394650	106487852	-	8173	protein_coding	endoplasmic reticulum (ER) to nucleus signalling 1 [Source:MGI Symbol;Acc:MGI:1930134]	-	481	384	517	452	456	324	401	405	327	445	2.54622	2.049	2.47069	2.44053	2.58564	1.78431	2.18992	2.24322	1.90865	2.42789
ENSMUSG00000070471	53.8313	35.3127	43.0673	42.554	23.9236	61.0169	36.2166	64.939	59.3992	55.4332	-0.47455	0.0383561	0.891126	Erich6	3	58616300	58637207	-	2195	protein_coding	glutamate rich 6 [Source:MGI Symbol;Acc:MGI:3588212]	-	56	36	49	43	23	60	36	64	55	55	1.10379	0.715255	0.871907	0.864493	0.4856	1.23033	0.732036	1.31991	1.19533	1.11732
ENSMUSG00000030172	603.68	683.693	634.584	683.833	745.793	575.593	579.466	600.686	579.953	608.758	0.185573	0.00555664	0.519307	Erc1	6	119570796	119848167	-	16271	protein_coding	ELKS/RAB6-interacting/CAST family member 1 [Source:MGI Symbol;Acc:MGI:2151013]	-	628	697	722	691	717	566	576	592	537	604	1.66985	1.86815	1.73313	1.87409	2.04216	1.5657	1.58006	1.64704	1.57441	1.65529
ENSMUSG00000028552	3031.86	3226.21	3101.73	3375.62	2937.41	3470.85	3462.71	3329.14	3394.4	3309.87	-0.114411	0.0103142	0.644933	Eps15	4	109280268	109387817	+	6931	protein_coding	epidermal growth factor receptor pathway substrate 15 [Source:MGI Symbol;Acc:MGI:104583]	-	3154	3289	3529	3411	2824	3413	3442	3281	3143	3284	19.6879	20.6948	19.8868	21.7177	18.8823	22.1639	22.1656	21.4293	21.6325	21.128
ENSMUSG00000055024	1613.98	1761.71	1896.72	1839.72	1817.16	1572.2	1530.15	1678.27	1456.9	1680.13	0.173366	0.00294536	0.447299	Ep300	15	81585351	81652077	+	14273	protein_coding	E1A binding protein p300 [Source:MGI Symbol;Acc:MGI:1276116]	-	1679	1796	2158	1859	1747	1546	1521	1654	1349	1667	5.08942	5.48762	5.90534	5.74767	5.67235	4.87529	4.7564	5.24587	4.50874	5.208
ENSMUSG00000038173	122.082	110.843	117.776	142.507	119.618	263.39	160.963	153.216	139.318	120.945	-0.451767	0.0118351	0.683484	Enpp6	8	46986887	47096762	+	6412	protein_coding	ectonucleotide pyrophosphatase/phosphodiesterase 6 [Source:MGI Symbol;Acc:MGI:2445171]	-	127	113	134	144	115	259	160	151	129	120	0.856925	0.76856	0.816244	0.991052	0.83117	1.81808	1.11376	1.06606	0.959743	0.834523
ENSMUSG00000022425	3067.42	3210.51	2874.08	3107.43	2907.24	3819.66	3495.91	3294.64	3506.71	2958.12	-0.170992	0.00709744	0.563875	Enpp2	15	54838901	54952892	-	5779	protein_coding	ectonucleotide pyrophosphatase/phosphodiesterase 2 [Source:MGI Symbol;Acc:MGI:1321390]	-	3191	3273	3270	3140	2795	3756	3475	3247	3247	2935	23.8895	24.6994	22.1006	23.9775	22.4137	29.2536	26.839	25.4347	26.8033	22.6468
ENSMUSG00000022505	397.967	346.261	421.005	410.696	426.465	482.034	425.546	445.441	444.954	442.458	-0.161892	0.0320966	0.858363	Emp2	16	10281749	10313968	-	8644	protein_coding	epithelial membrane protein 2 [Source:MGI Symbol;Acc:MGI:1098726]	-	414	353	479	415	410	474	423	439	412	439	2.07214	1.78095	2.16436	2.11866	2.19814	2.46814	2.18419	2.29904	2.27374	2.26465
ENSMUSG00000047260	540.236	560.099	519.445	500.752	528.4	575.593	562.364	564.158	647.992	575.498	-0.142721	0.0286431	0.845499	Emc6	11	73175519	73177037	-	1415	protein_coding	ER membrane protein complex subunit 6 [Source:MGI Symbol;Acc:MGI:1913298]	-	562	571	591	506	508	566	559	556	600	571	17.1835	17.5984	16.3132	15.7805	16.6377	18.0039	17.6327	17.7875	20.228	17.9941
ENSMUSG00000017670	2531.03	2519.95	2171.82	2558.19	2415.25	2666.44	2552.27	2647.28	2604.93	2672.89	-0.10837	0.0302407	0.856052	Elmo2	2	165288031	165326479	-	6652	protein_coding	engulfment and cell motility 2 [Source:MGI Symbol;Acc:MGI:2153045]	-	2633	2569	2471	2585	2322	2622	2537	2609	2412	2652	17.125	16.8424	14.5087	17.1489	16.1769	17.7413	17.0229	17.7549	17.2975	17.7776
ENSMUSG00000053565	1267.92	1118.24	1206.76	1238.03	1284.6	1348.47	1326.94	1267.33	1468.78	1287.06	-0.131233	0.0218021	0.819599	Eif3k	7	28971372	28981864	-	2698	protein_coding	eukaryotic translation initiation factor 3, subunit K [Source:MGI Symbol;Acc:MGI:1921080]	-	1319	1140	1373	1251	1235	1326	1319	1249	1360	1277	21.1512	18.427	19.8764	20.4618	21.2134	22.1211	21.8206	20.9565	24.0467	21.1057
ENSMUSG00000024841	421.999	403.153	363.875	400.8	351.573	474.915	468.804	387.605	428.754	429.355	-0.173569	0.0326215	0.860175	Eif1ad	19	5366813	5371511	+	2469	protein_coding	eukaryotic translation initiation factor 1A domain containing [Source:MGI Symbol;Acc:MGI:1917110]	-	439	411	414	405	338	467	466	382	397	426	7.69265	7.25962	6.5492	7.23872	6.34426	8.51337	8.42422	7.0039	7.67058	7.69377
ENSMUSG00000037868	14.4191	14.7136	14.0628	10.8859	13.5221	5.08474	5.03009	11.1614	9.71987	5.03938	0.913045	0.026007	0.845499	Egr2	10	67535475	67542188	+	3398	protein_coding	early growth response 2 [Source:MGI Symbol;Acc:MGI:95296]	zf-C2H2	15	15	16	11	13	5	5	11	9	5	0.190986	0.192513	0.18391	0.142855	0.177299	0.0662297	0.0656767	0.146544	0.126351	0.0656141
ENSMUSG00000048915	490.25	466.913	433.31	485.908	502.396	414.915	433.594	415.001	408.235	448.505	0.164304	0.0174508	0.774253	Efna5	17	62604184	62881317	-	4032	protein_coding	ephrin A5 [Source:MGI Symbol;Acc:MGI:107444]	-	510	476	493	491	483	408	431	409	378	445	5.47245	5.14848	4.77568	5.37389	5.55152	4.55455	4.77113	4.59198	4.47229	4.92142
ENSMUSG00000026255	392.2	432.581	383.211	447.312	387.979	533.898	451.702	488.057	421.195	447.497	-0.197949	0.0155546	0.74692	Efhd1	1	87264363	87310839	+	2125	protein_coding	EF hand domain containing 1 [Source:MGI Symbol;Acc:MGI:1921607]	-	408	441	436	452	373	525	449	481	390	444	8.3068	9.0505	8.01376	9.38657	8.13458	11.12	9.43088	10.2467	8.75517	9.31697
ENSMUSG00000036611	111.508	109.862	126.565	136.569	122.739	147.458	198.185	140.025	115.559	148.158	-0.304756	0.0316075	0.856052	Eepd1	9	25481547	25604110	+	2935	protein_coding	endonuclease/exonuclease/phosphatase family domain containing 1 [Source:MGI Symbol;Acc:MGI:1914734]	-	116	112	144	138	118	145	197	138	107	147	1.70995	1.66419	1.9163	2.07491	1.8632	2.22365	2.99587	2.12847	1.73914	2.23337
ENSMUSG00000022122	1471.71	1112.35	1009.01	1504.24	1190.98	1331.19	1396.35	1562.6	1501.18	1536	-0.220896	0.0258187	0.845499	Ednrb	14	103814625	103844402	-	4266	protein_coding	endothelin receptor type B [Source:MGI Symbol;Acc:MGI:102720]	-	1531	1134	1148	1520	1145	1309	1388	1540	1390	1524	15.527	11.5927	10.5107	15.7235	12.4386	13.811	14.5222	16.3417	15.5436	15.93
ENSMUSG00000066839	495.056	531.652	510.655	482.939	457.669	525.762	552.304	518.498	570.233	559.372	-0.136579	0.0373705	0.887644	Ecsit	9	22072246	22085438	-	2490	protein_coding	ECSIT signalling integrator [Source:MGI Symbol;Acc:MGI:1349469]	-	515	542	581	488	440	517	549	511	528	555	8.9483	9.49277	9.11351	8.64864	8.18915	9.34538	9.84096	9.29007	10.1156	9.93904
ENSMUSG00000039982	1068.94	1108.43	1115.36	1096.51	1135.85	996.61	959.741	1073.52	927.708	989.735	0.158924	0.00233424	0.410552	Dtx4	19	12466341	12501996	-	5765	protein_coding	deltex 4, E3 ubiquitin ligase [Source:MGI Symbol;Acc:MGI:2672905]	-	1112	1130	1269	1108	1092	980	954	1058	859	982	8.34522	8.54815	8.59748	8.48141	8.77826	7.65125	7.38608	8.30776	7.10809	7.59561
ENSMUSG00000057531	647.898	622.877	616.126	592.788	507.597	668.135	696.164	626.053	663.111	643.025	-0.141004	0.0471128	0.916309	Dtnbp1	13	44922075	45002147	-	3728	protein_coding	dystrobrevin binding protein 1 [Source:MGI Symbol;Acc:MGI:2137586]	-	674	635	701	599	488	657	692	617	614	638	7.82198	7.42832	7.34431	7.09053	6.06638	7.93223	8.28504	7.49215	7.8569	7.63125
ENSMUSG00000050272	1809.12	1792.12	1847.5	1674.45	1813	1575.25	1593.53	1734.07	1545.46	1683.15	0.136134	0.005269	0.508839	Dscam	16	96590840	97170752	-	8800	protein_coding	DS cell adhesion molecule [Source:MGI Symbol;Acc:MGI:1196281]	-	1882	1827	2102	1692	1743	1549	1584	1709	1431	1670	9.25272	9.05417	9.32951	8.48487	9.1791	7.92273	8.0341	8.79137	7.75739	8.46222
ENSMUSG00000024914	2053.28	1743.07	1793.01	1729.87	1695.46	2011.52	2032.16	2011.08	2176.17	1969.39	-0.177864	0.00207657	0.38482	Drap1	19	5422805	5424979	-	1741	protein_coding	Dr1 associated protein 1 (negative cofactor 2 alpha) [Source:MGI Symbol;Acc:MGI:1913806]	-	2136	1777	2040	1748	1630	1978	2020	1982	2015	1954	53.0805	44.5125	45.7657	44.3068	43.3885	51.1368	51.7866	51.535	55.2122	50.0468
ENSMUSG00000001229	1437.1	1642.04	1528.45	1525.02	1501.99	1433.9	1381.26	1439.82	1429.9	1385.83	0.110772	0.0192042	0.798627	Dpp9	17	56186807	56218905	-	7883	protein_coding	dipeptidylpeptidase 9 [Source:MGI Symbol;Acc:MGI:2443967]	-	1495	1674	1739	1541	1444	1410	1373	1419	1324	1375	8.20507	9.26098	8.61622	8.62658	8.48909	8.0507	7.77398	8.1487	8.01227	7.77789
ENSMUSG00000058325	643.092	648.381	588.001	587.84	618.894	684.406	770.61	700.124	619.912	705.514	-0.174429	0.0100172	0.63551	Dock1	7	134670654	135173639	+	9330	protein_coding	dedicator of cytokinesis 1 [Source:MGI Symbol;Acc:MGI:2429765]	-	669	661	669	594	595	673	766	690	574	700	3.10225	3.08967	2.80061	2.80952	2.95543	3.24668	3.66448	3.34784	2.93487	3.34555
ENSMUSG00000033335	1275.61	1418.39	1316.63	1238.03	1332.44	1229.49	1244.44	1191.23	1126.43	1266.9	0.118979	0.0265745	0.845499	Dnm2	9	21424908	21507759	+	5330	protein_coding	dynamin 2 [Source:MGI Symbol;Acc:MGI:109547]	-	1327	1446	1498	1251	1281	1209	1237	1174	1043	1257	10.7715	11.8313	10.9772	10.3576	11.138	10.2095	10.3587	9.97099	9.33504	10.5162
ENSMUSG00000019088	45.1799	51.0073	41.3095	49.4814	46.8071	47.7966	36.2166	39.5722	20.5197	26.2048	0.452638	0.0475652	0.921416	Dnase1l1	X	74273217	74282337	-	2121	protein_coding	deoxyribonuclease 1-like 1 [Source:MGI Symbol;Acc:MGI:109628]	-	47	52	47	50	45	47	36	39	19	26	0.958715	1.06919	0.865498	1.0403	0.983235	0.997386	0.757576	0.832379	0.427338	0.546617
ENSMUSG00000033826	31.722	43.16	30.7624	36.6163	35.3654	28.4746	17.1023	30.4402	15.1198	26.2048	0.593322	0.0202213	0.817511	Dnah8	17	30624354	30875264	+	14583	protein_coding	dynein, axonemal, heavy chain 8 [Source:MGI Symbol;Acc:MGI:107714]	-	33	44	35	37	34	28	17	30	14	26	0.0979038	0.131583	0.0937411	0.111965	0.108048	0.0864206	0.0520315	0.0931262	0.0457973	0.0795018
ENSMUSG00000055809	71.1343	51.0073	62.4037	48.4918	56.1685	87.4576	74.4453	67.983	87.4789	59.4647	-0.378438	0.0309558	0.856052	Dnaaf3	7	4522933	4532453	-	2224	protein_coding	dynein, axonemal assembly factor 3 [Source:MGI Symbol;Acc:MGI:3588207]	-	74	52	71	49	54	86	74	67	81	59	1.43956	1.01967	1.2469	0.972274	1.12524	1.74048	1.48512	1.36376	1.73744	1.18295
ENSMUSG00000041911	747.871	587.564	750.602	822.382	846.689	534.915	512.063	705.197	670.671	739.782	0.247637	0.0300249	0.856052	Dlx1	2	71528113	71533981	+	5396	protein_coding	distal-less homeobox 1 [Source:MGI Symbol;Acc:MGI:94901]	Homeobox	778	599	854	831	814	526	509	695	621	734	6.23793	4.84114	6.18151	6.79605	6.99098	4.38753	4.21028	5.83056	5.49008	6.06561
ENSMUSG00000030772	1294.84	1230.06	1415.07	1221.2	1410.45	1174.58	1023.12	1301.82	1245.22	1206.43	0.143383	0.0428411	0.905032	Dkk3	7	112116017	112159057	-	3359	protein_coding	dickkopf WNT signaling pathway inhibitor 3 [Source:MGI Symbol;Acc:MGI:1354952]	-	1347	1254	1610	1234	1356	1155	1017	1283	1153	1197	17.3496	16.281	18.7208	16.2119	18.7083	15.4767	13.5137	17.2908	16.3749	15.8904
ENSMUSG00000040035	15938.9	15539.6	16667.9	15941.9	16995.1	13562	14143.6	16400.1	15093.9	15991	0.108854	0.0466894	0.916309	Disp2	2	118779719	118811293	+	9555	protein_coding	dispatched RND tramsporter family member 2 [Source:MGI Symbol;Acc:MGI:2388733]	-	16581	15842	18964	16109	16339	13336	14059	16163	13976	15866	75.078	72.3056	77.519	74.3987	79.2465	62.8204	65.6732	76.5753	69.7768	74.0436
ENSMUSG00000043051	63.4441	77.4918	52.7355	78.1807	70.7307	50.8474	47.2828	61.895	38.8795	53.4175	0.436048	0.0176834	0.774253	Disc1	8	125054195	125261858	+	3804	protein_coding	disrupted in schizophrenia 1 [Source:MGI Symbol;Acc:MGI:2447658]	-	66	79	60	79	68	50	47	61	36	53	0.750647	0.90569	0.616055	0.916461	0.828426	0.59161	0.55147	0.725917	0.451462	0.621278
ENSMUSG00000002332	1055.48	1001.51	896.503	960.93	897.656	1180.68	1192.13	1041.05	1149.11	1079.44	-0.22967	0.000288044	0.173106	Dhrs1	14	55739020	55745690	-	2760	protein_coding	dehydrogenase/reductase (SDR family) member 1 [Source:MGI Symbol;Acc:MGI:1196314]	-	1098	1021	1020	971	863	1161	1185	1026	1064	1071	17.2118	16.1328	14.4344	15.5252	14.4906	18.9334	19.1635	16.8281	18.3904	17.3034
ENSMUSG00000062393	927.629	951.481	1270.05	1025.26	1212.82	797.288	824.935	993.364	915.828	978.648	0.256637	0.00728994	0.573398	Dgkk	X	6779306	6948363	+	7158	protein_coding	diacylglycerol kinase kappa [Source:MGI Symbol;Acc:MGI:3580254]	-	965	970	1445	1036	1166	784	820	979	848	971	5.83268	5.9098	7.8847	6.38698	7.54905	4.92981	5.11313	6.19139	5.65149	6.04893
ENSMUSG00000036095	1163.14	1394.85	1387.82	1357.77	1672.57	1093.22	1227.34	1424.6	1260.34	1133.86	0.184069	0.0426191	0.905032	Dgkb	12	37817726	38634239	+	11377	protein_coding	diacylglycerol kinase, beta [Source:MGI Symbol;Acc:MGI:2442474]	-	1210	1422	1579	1372	1608	1075	1220	1404	1167	1125	4.6014	5.45086	5.4208	5.32174	6.55004	4.25291	4.78626	5.58646	4.8933	4.40936
ENSMUSG00000003531	851.689	843.581	817.4	837.226	813.403	944.745	854.109	938.572	930.948	892.979	-0.131549	0.0114767	0.67732	Dgcr6	16	18052860	18071632	+	2985	protein_coding	DiGeorge syndrome critical region gene 6 [Source:MGI Symbol;Acc:MGI:1202877]	-	886	860	930	846	782	929	849	925	862	886	12.8417	12.5646	12.1688	12.507	12.1408	14.008	12.6949	14.028	13.776	13.2355
ENSMUSG00000023106	1040.1	917.15	852.557	898.583	857.09	947.796	1023.12	1044.1	1029.23	955.467	-0.130997	0.0424764	0.905032	Denr	5	123907175	123928835	+	6094	protein_coding	density-regulated protein [Source:MGI Symbol;Acc:MGI:1915434]	-	1082	935	970	908	824	932	1017	1029	953	948	7.6817	6.69117	6.21696	6.57523	6.26628	6.88366	7.44875	7.64382	7.46018	6.93676
ENSMUSG00000036661	180.719	163.812	210.942	167.247	188.269	213.559	200.198	218.155	198.717	222.741	-0.207978	0.0397904	0.899449	Dennd3	15	73512560	73572242	+	5709	protein_coding	DENN/MADD domain containing 3 [Source:MGI Symbol;Acc:MGI:2146009]	-	188	167	240	169	181	210	199	215	184	221	1.42472	1.2757	1.64195	1.30633	1.46928	1.65564	1.55581	1.70481	1.53751	1.72617
ENSMUSG00000021263	48.0637	95.1481	79.1032	86.0977	72.8111	68.1355	59.355	45.6603	53.9993	61.4805	0.400784	0.0384698	0.891126	Degs2	12	108678711	108702315	-	2583	protein_coding	delta(4)-desaturase, sphingolipid 2 [Source:MGI Symbol;Acc:MGI:1917309]	-	50	97	90	87	70	67	59	45	50	61	0.837487	1.63772	1.3609	1.48635	1.25591	1.1675	1.01951	0.788652	0.923431	1.05307
ENSMUSG00000075573	0.961274	2.94273	0.878925	1.97926	0	3.05085	7.04212	1.01467	7.5599	9.07089	-2.0333	0.0167647	1	Defb47	14	62998077	63001160	+	359	protein_coding	defensin beta 47 [Source:MGI Symbol;Acc:MGI:3644478]	-	1	3	1	2	0	3	7	1	7	9	0.120514	0.364435	0.108796	0.245846	0	0.376125	0.870299	0.126096	0.93017	1.11789
ENSMUSG00000003534	2207.08	2252.17	2103.27	2290	2228.02	2623.73	2333.96	2364.19	2217.21	2340.29	-0.100836	0.0458214	0.916309	Ddr1	17	35681567	35704621	-	4774	protein_coding	discoidin domain receptor family, member 1 [Source:MGI Symbol;Acc:MGI:99216]	-	2296	2296	2393	2314	2142	2580	2320	2330	2053	2322	20.8076	20.9741	19.578	21.3899	20.7933	24.3245	21.6905	22.0938	20.5147	21.6885
ENSMUSG00000007039	126.888	103.976	114.26	111.828	93.6142	153.559	146.879	114.658	149.038	108.851	-0.287207	0.0380433	0.88766	Ddah2	17	35059035	35062095	+	1593	protein_coding	dimethylarginine dimethylaminohydrolase 2 [Source:MGI Symbol;Acc:MGI:1859016]	-	132	106	130	113	90	151	146	113	138	108	3.58501	2.9019	3.1874	3.13033	2.61826	4.26645	4.09074	3.21115	4.13259	3.02314
ENSMUSG00000031516	894.946	786.689	874.53	770.921	763.476	938.643	895.356	888.853	887.749	911.121	-0.143584	0.0176788	0.774253	Dctn6	8	34090420	34108796	-	2853	protein_coding	dynactin 6 [Source:MGI Symbol;Acc:MGI:1343154]	-	931	802	995	779	734	923	890	876	822	904	14.1182	12.2593	13.6217	12.0493	11.9228	14.5615	13.9236	13.8995	13.7445	14.1292
ENSMUSG00000036862	710.381	626.801	799.822	653.155	728.111	533.898	622.725	617.935	614.512	712.569	0.182347	0.032344	0.858733	Dchs1	7	105752990	105787654	-	11052	protein_coding	dachsous cadherin related 1 [Source:MGI Symbol;Acc:MGI:2685011]	-	739	639	910	660	700	525	619	609	569	707	2.89292	2.52146	3.21595	2.6353	2.93523	2.13808	2.49985	2.49444	2.45601	2.85252
ENSMUSG00000059824	800.741	672.903	590.637	799.62	588.729	851.186	918.494	777.239	818.629	973.609	-0.330028	0.000752659	0.230719	Dbp	7	45705088	45710203	+	2993	protein_coding	D site albumin promoter binding protein [Source:MGI Symbol;Acc:MGI:94866]	TF_bZIP	833	686	672	808	566	837	913	766	758	966	12.0412	9.99563	8.76943	11.9133	8.76385	12.5871	13.6153	11.5856	12.0815	14.392
ENSMUSG00000034675	4592.97	4326.79	4567.77	4367.23	4563.17	4052.54	4166.93	4332.65	4256.22	4365.11	0.0824658	0.0261904	0.845499	Dbn1	13	55473429	55488111	-	4514	protein_coding	drebrin 1 [Source:MGI Symbol;Acc:MGI:1931838]	-	4778	4411	5197	4413	4387	3985	4142	4270	3941	4331	45.7949	42.6156	44.9676	43.142	45.0393	39.735	40.9556	42.8217	41.6489	42.7836
ENSMUSG00000021559	2027.33	2082.47	1964.4	1875.35	1983.58	1808.13	1957.71	1823.37	1815.46	1908.92	0.0927546	0.0402882	0.900166	Dapk1	13	60601947	60763191	+	9012	protein_coding	death associated protein kinase 1 [Source:MGI Symbol;Acc:MGI:1916885]	-	2109	2123	2235	1895	1907	1778	1946	1797	1681	1894	10.1248	10.2736	9.68646	9.27931	9.80652	8.88007	9.63799	9.0266	8.89827	9.37151
ENSMUSG00000107994	4.80637	4.90454	6.15247	7.91703	7.28111	15.2542	16.0963	9.13205	10.7999	7.05514	-0.912874	0.039873	0.900146	D830050J10Rik	6	115675968	115677780	+	1813	bidirectional_promoter_lncRNA	RIKEN cDNA D830050J10 gene [Source:MGI Symbol;Acc:MGI:2444203]	-	5	5	7	8	7	15	16	9	10	7	0.119318	0.120272	0.150803	0.194724	0.178931	0.372391	0.393901	0.22472	0.263124	0.172167
ENSMUSG00000112237	28.8382	23.5418	24.6099	16.8237	27.0441	44.7457	29.1745	25.3668	39.9595	42.3308	-0.586214	0.0210453	0.819153	D630033A02Rik	10	122985074	122986555	-	1482	transcribed_processed_pseudogene	RIKEN cDNA D630033A02 gene [Source:MGI Symbol;Acc:MGI:3028060]	-	30	24	28	17	26	44	29	25	37	42	0.875801	0.706246	0.737936	0.506207	0.813037	1.33632	0.873403	0.763641	1.191	1.26372
ENSMUSG00000110874	0	0	0	0	2.08032	4.06779	2.01204	5.07336	5.39993	1.00788	-3.14306	0.0108246	1	D030045P18Rik	10	45807562	45852283	+	4867	lincRNA	RIKEN cDNA D030045P18 gene [Source:MGI Symbol;Acc:MGI:2443891]	-	0	0	0	0	2	4	2	5	5	1	0	0	0	0	0.0190438	0.0369917	0.0183414	0.0465057	0.0490081	0.00916198
ENSMUSG00000015224	673.853	931.863	905.293	608.622	884.134	579.661	601.599	724.476	694.431	626.899	0.311439	0.00598606	0.529976	Cyp2j9	4	96568429	96591578	-	3337	protein_coding	cytochrome P450, family 2, subfamily j, polypeptide 9 [Source:MGI Symbol;Acc:MGI:1921769]	-	701	950	1030	615	850	570	598	714	643	622	9.08854	12.4154	12.0556	8.13292	11.8045	7.6882	7.99852	9.68589	9.19208	8.3116
ENSMUSG00000052914	510.436	483.588	478.135	450.281	425.425	518.644	541.238	551.982	568.073	478.741	-0.178054	0.014877	0.730527	Cyp2j6	4	96516138	96553661	-	3605	protein_coding	cytochrome P450, family 2, subfamily j, polypeptide 6 [Source:MGI Symbol;Acc:MGI:1270148]	-	531	493	544	455	409	510	538	544	526	475	6.37268	5.96396	5.8939	5.56972	5.25779	6.36753	6.66103	6.83111	6.96048	5.87542
ENSMUSG00000081225	55.7539	84.3581	65.0404	59.3777	45.7669	103.729	81.4874	67.983	73.4391	77.6065	-0.380008	0.0394127	0.894688	Cyp2j12	4	96099318	96141152	-	1944	protein_coding	cytochrome P450, family 2, subfamily j, polypeptide 12 [Source:MGI Symbol;Acc:MGI:3717097]	-	58	86	74	60	44	102	81	67	68	77	1.29082	1.92928	1.48677	1.36202	1.04892	2.36162	1.85975	1.56018	1.66867	1.76622
ENSMUSG00000026170	173.991	154.003	138.87	145.475	140.421	282.712	229.372	178.582	177.118	203.591	-0.50995	0.00017734	0.146796	Cyp27a1	1	74713574	74737892	+	2173	protein_coding	cytochrome P450, family 27, subfamily a, polypeptide 1 [Source:MGI Symbol;Acc:MGI:88594]	-	181	157	158	147	135	278	228	176	164	202	3.60372	3.15089	2.83992	2.98528	2.87912	5.75826	4.68317	3.66649	3.60034	4.14517
ENSMUSG00000063694	1590.91	1523.35	1475.71	1411.21	1432.3	1626.1	1712.24	1552.45	1661.02	1591.44	-0.131298	0.00808805	0.60341	Cycs	6	50562563	50566538	-	3404	protein_coding	cytochrome c, somatic [Source:MGI Symbol;Acc:MGI:88578]	-	1655	1553	1679	1426	1377	1599	1702	1530	1538	1579	21.0349	19.8964	19.265	18.4866	18.7469	21.1429	22.3169	20.3469	21.5539	20.6844
ENSMUSG00000022551	2454.13	2368.89	2352	2361.25	2395.48	2480.34	2526.11	2419.99	2585.49	2545.9	-0.0737368	0.0456976	0.916309	Cyc1	15	76343523	76346260	+	2154	protein_coding	cytochrome c-1 [Source:MGI Symbol;Acc:MGI:1913695]	-	2553	2415	2676	2386	2303	2439	2511	2385	2394	2526	51.2788	48.895	48.5232	48.8824	49.5488	50.965	52.0314	50.1233	53.0197	52.2924
ENSMUSG00000044795	471.985	529.691	474.619	479.97	545.043	411.864	442.648	466.749	425.514	501.923	0.15226	0.046704	0.916309	Cyb5d1	11	69391925	69395631	-	1605	protein_coding	cytochrome b5 domain containing 1 [Source:MGI Symbol;Acc:MGI:2685586]	-	491	540	540	485	524	405	440	460	394	498	13.2355	14.6728	13.141	13.335	15.1301	11.3576	12.2361	12.9742	11.7106	13.8358
ENSMUSG00000045382	22.1093	18.6373	21.9731	20.7822	20.8032	61.0169	32.1926	26.3815	25.9197	29.2284	-0.744685	0.00997945	0.63551	Cxcr4	1	128588199	128592293	-	1808	protein_coding	chemokine (C-X-C motif) receptor 4 [Source:MGI Symbol;Acc:MGI:109563]	-	23	19	25	21	20	60	32	26	24	29	0.550379	0.458298	0.54007	0.512564	0.512645	1.49368	0.78998	0.650987	0.633245	0.715237
ENSMUSG00000029379	0	0	0	0	0	7.11864	1.00602	1.01467	2.15997	1.00788	-3.78765	0.00880732	1	Cxcl3	5	90786103	90789600	+	3498	protein_coding	chemokine (C-X-C motif) ligand 3 [Source:MGI Symbol;Acc:MGI:3037818]	-	0	0	0	0	0	7	1	1	2	1	0	0	0	0	0	0.0900708	0.0127598	0.0129413	0.0272753	0.0127477
ENSMUSG00000004096	859.379	820.04	881.562	837.226	846.689	876.61	899.38	929.44	989.267	901.042	-0.113648	0.0333671	0.860175	Cwc15	9	14500617	14510577	+	1571	protein_coding	CWC15 spliceosome-associated protein [Source:MGI Symbol;Acc:MGI:1913320]	-	894	836	1003	846	814	862	894	916	916	894	24.6203	23.2072	24.9364	23.7641	24.0123	24.6966	25.3995	26.3947	27.8149	25.3753
ENSMUSG00000036748	1699.53	1563.57	1508.23	1578.46	1587.28	1692.2	1734.37	1637.68	1813.3	1848.45	-0.136818	0.0070546	0.563875	Cuedc2	19	46329812	46338660	-	1941	protein_coding	CUE domain containing 2 [Source:MGI Symbol;Acc:MGI:1914366]	-	1768	1594	1716	1595	1526	1664	1724	1614	1679	1834	39.4084	35.8142	34.5303	36.2629	36.4346	38.5863	39.6439	37.6422	41.2652	42.1332
ENSMUSG00000007891	3506.73	3722.55	3692.36	3611.16	3492.85	3151.52	3157.89	3261.16	3461.36	3328.01	0.140206	0.00056942	0.215179	Ctsd	7	142375911	142388038	-	2351	protein_coding	cathepsin D [Source:MGI Symbol;Acc:MGI:88562]	-	3648	3795	4201	3649	3358	3099	3139	3214	3205	3302	67.1328	70.3967	69.7925	68.4934	66.1932	59.3301	59.5941	61.8857	65.0331	62.6289
ENSMUSG00000030560	121.12	136.346	137.991	126.672	138.341	128.136	110.662	87.2618	113.399	101.796	0.287755	0.0238583	0.839298	Ctsc	7	88278085	88310888	+	5808	protein_coding	cathepsin C [Source:MGI Symbol;Acc:MGI:109553]	-	126	139	157	128	133	126	110	86	105	101	0.938591	1.04371	1.0558	0.972548	1.06123	0.97645	0.845339	0.6703	0.862426	0.775435
ENSMUSG00000044258	51.9088	59.8354	79.1032	47.5022	61.3693	21.3559	38.2287	35.5135	38.8795	32.2521	0.854632	9.15561e-05	0.09947	Ctla2a	13	60934155	60936625	-	2108	protein_coding	cytotoxic T lymphocyte-associated protein 2 alpha [Source:MGI Symbol;Acc:MGI:88554]	-	54	61	90	48	59	21	38	35	36	32	1.1083	1.26198	1.66756	1.00484	1.29708	0.448389	0.804596	0.751614	0.814687	0.676909
ENSMUSG00000030970	808.431	728.815	786.638	792.693	862.291	699.661	665.984	755.931	707.391	692.411	0.175828	0.00427406	0.486127	Ctbp2	7	132987563	133124354	-	6220	protein_coding	C-terminal binding protein 2 [Source:MGI Symbol;Acc:MGI:1201686]	-	841	743	895	801	829	688	662	745	655	687	5.84976	5.20944	5.62007	5.6829	6.1766	4.97856	4.75042	5.42205	5.02354	4.92512
ENSMUSG00000117246	1.92255	4.90454	0	1.97926	4.16063	1.01695	0	0	0	1.00788	2.61586	0.0489544	1	CT025671.2	17	66227249	66228027	-	779	processed_pseudogene	periphilin 1 (Pphln1) pseudogene	-	2	5	0	2	4	1	0	0	0	1	0.111077	0.279915	0	0.113297	0.237962	0.0577788	0	0	0	0.0572418
ENSMUSG00000026421	4855.39	5330.26	4657.42	4781.89	4494.52	5778.3	5449.6	5157.58	5515.49	5161.34	-0.166047	0.00158471	0.33594	Csrp1	1	135720061	135752232	+	1956	protein_coding	cysteine and glycine-rich protein 1 [Source:MGI Symbol;Acc:MGI:88549]	-	5051	5434	5299	4832	4321	5682	5417	5083	5107	5121	111.723	121.156	105.812	109.015	102.377	130.749	123.61	117.638	124.554	116.745
ENSMUSG00000032060	1340.98	1793.1	1347.39	1486.42	1378.21	1815.25	1633.77	1512.88	1756.06	1628.73	-0.184304	0.0231561	0.833379	Cryab	9	50751325	50756636	+	1479	protein_coding	crystallin, alpha B [Source:MGI Symbol;Acc:MGI:88516]	-	1395	1828	1533	1502	1325	1785	1624	1491	1626	1616	40.8074	53.9015	40.4839	44.8156	41.5177	54.322	49.0098	45.6359	52.4459	48.7219
ENSMUSG00000038648	516.204	504.187	537.902	509.659	491.995	472.881	396.371	490.087	474.114	472.694	0.151652	0.0336489	0.860175	Creb3l2	6	37327255	37442146	-	7283	protein_coding	cAMP responsive element binding protein 3-like 2 [Source:MGI Symbol;Acc:MGI:2442695]	TF_bZIP	537	514	612	515	473	465	394	483	439	469	3.19004	3.07784	3.28209	3.1205	3.00979	2.87375	2.41463	3.00216	2.8755	2.87153
ENSMUSG00000048200	57.6764	49.0454	46.583	45.5229	43.6866	41.6949	36.2166	26.3815	37.7995	35.2757	0.452753	0.0254199	0.845499	Cracr2b	7	141461094	141466613	+	2764	protein_coding	calcium release activated channel regulator 2B [Source:MGI Symbol;Acc:MGI:2446129]	-	60	50	53	46	42	41	36	26	35	35	0.939173	0.788905	0.748939	0.734425	0.704201	0.667654	0.581339	0.425827	0.604072	0.564652
ENSMUSG00000018727	112.469	140.27	130.96	140.527	149.783	100.678	106.638	81.1738	92.8788	111.874	0.448346	0.0006987	0.223084	Cpsf4l	11	113698172	113710017	-	2246	protein_coding	cleavage and polyadenylation specific factor 4-like [Source:MGI Symbol;Acc:MGI:1277182]	-	117	143	149	142	144	99	106	80	86	111	2.25377	2.77664	2.59111	2.79001	2.97124	1.98395	2.1065	1.61242	1.82662	2.20376
ENSMUSG00000022742	934.358	828.868	890.351	875.821	888.295	1049.49	977.849	989.305	893.148	908.097	-0.125277	0.0364622	0.885095	Cpox	16	58670292	58717636	+	6661	protein_coding	coproporphyrinogen oxidase [Source:MGI Symbol;Acc:MGI:104841]	-	972	845	1013	885	854	1032	972	975	827	901	6.31334	5.53236	5.9399	5.86316	5.9416	6.97343	6.51316	6.62617	5.92277	6.03165
ENSMUSG00000017778	1911.97	1606.73	1598.76	1419.13	1591.44	1934.24	1850.07	1714.8	2026.05	1754.71	-0.190937	0.0102787	0.644933	Cox7c	13	86044816	86046904	-	1131	protein_coding	cytochrome c oxidase subunit 7C [Source:MGI Symbol;Acc:MGI:103226]	-	1989	1638	1819	1434	1530	1902	1839	1690	1876	1741	76.086	63.1603	62.8173	55.9518	62.6923	75.6927	72.5745	67.6428	79.1278	68.6415
ENSMUSG00000031231	1789.89	1672.45	1587.34	1622	1495.75	1860	1903.39	1665.08	1842.46	1634.78	-0.124613	0.0438931	0.909409	Cox7b	X	106015700	106022450	+	1214	protein_coding	cytochrome c oxidase subunit 7B [Source:MGI Symbol;Acc:MGI:1913392]	-	1862	1705	1806	1639	1438	1829	1892	1641	1706	1622	66.358	61.2489	58.1043	59.5783	54.8941	67.8111	69.5612	61.191	67.0377	59.5776
ENSMUSG00000036751	2151.33	2077.56	1972.31	1961.44	2105.28	2251.52	2239.4	2081.09	2364.09	2081.27	-0.101614	0.0433729	0.905032	Cox6b1	7	30616861	30626151	-	708	protein_coding	cytochrome c oxidase, subunit 6B1 [Source:MGI Symbol;Acc:MGI:107460]	-	2238	2118	2244	1982	2024	2214	2226	2051	2189	2065	136.76	130.462	123.794	123.537	132.484	140.751	140.332	131.138	147.493	130.058
ENSMUSG00000061518	2708.87	2327.7	2277.29	2294.95	2251.94	2703.05	2739.39	2482.9	2711.84	2487.44	-0.145966	0.0133266	0.708276	Cox5b	1	36691449	36693681	+	1587	protein_coding	cytochrome c oxidase subunit 5B [Source:MGI Symbol;Acc:MGI:88475]	-	2818	2373	2591	2319	2165	2658	2723	2447	2511	2468	76.8239	65.2099	63.7675	64.4839	63.2217	75.3848	76.5835	69.7998	75.4794	69.3456
ENSMUSG00000031818	6598.18	6645.66	6083.92	5764.59	5761.43	6932.54	6925.43	6328.51	7292.07	6371.8	-0.133614	0.0198073	0.813974	Cox4i1	8	120668222	120674207	+	1550	protein_coding	cytochrome c oxidase subunit 4I1 [Source:MGI Symbol;Acc:MGI:88473]	-	6864	6775	6922	5825	5539	6817	6884	6237	6752	6322	191.592	190.621	174.425	165.841	165.609	197.955	198.232	182.155	207.807	181.875
ENSMUSG00000030652	473.908	428.657	413.095	448.302	412.943	457.627	474.84	513.424	525.953	562.395	-0.219193	0.0039916	0.486127	Coq7	7	118509659	118533356	-	6434	protein_coding	demethyl-Q 7 [Source:MGI Symbol;Acc:MGI:107207]	-	493	437	470	453	397	450	472	506	487	558	3.31511	2.96206	2.85316	3.10702	2.85953	3.14802	3.27435	3.56014	3.61083	3.86726
ENSMUSG00000027570	386.432	328.604	312.897	404.758	289.164	443.39	435.606	429.206	377.995	388.033	-0.268904	0.00611176	0.529976	Col9a3	2	180597790	180622189	+	3853	protein_coding	collagen, type IX, alpha 3 [Source:MGI Symbol;Acc:MGI:894686]	-	402	335	356	409	278	436	433	423	350	385	4.51398	3.79174	3.60878	4.68438	3.34373	5.09323	5.01595	4.9698	4.33339	4.45566
ENSMUSG00000091345	89.3985	107.9	126.565	103.911	193.469	80.3389	68.4092	116.687	80.999	80.6301	0.538945	0.00849061	0.618413	Col6a5	9	105856078	105960643	-	9413	protein_coding	collagen, type VI, alpha 5 [Source:MGI Symbol;Acc:MGI:3648134]	-	93	110	144	105	186	79	68	115	75	80	0.427452	0.509633	0.597507	0.492253	0.915736	0.37775	0.322437	0.553054	0.380095	0.378977
ENSMUSG00000032572	70.173	51.9882	96.6817	111.828	96.7347	35.5932	40.2407	65.9537	62.6392	70.5514	0.636915	0.00671399	0.550516	Col6a4	9	105989454	106096783	-	8526	protein_coding	collagen, type VI, alpha 4 [Source:MGI Symbol;Acc:MGI:1915803]	-	73	53	110	113	93	35	40	65	58	70	0.370433	0.271096	0.503914	0.584872	0.505502	0.184769	0.209401	0.345116	0.32452	0.366103
ENSMUSG00000024330	758.445	612.087	626.673	736.284	678.183	776.949	721.315	795.503	912.588	836.538	-0.244848	0.00218689	0.395987	Col11a2	17	34039437	34066685	+	6831	protein_coding	collagen, type XI, alpha 2 [Source:MGI Symbol;Acc:MGI:88447]	-	789	624	713	744	652	764	717	784	845	830	4.99718	3.98376	4.07675	4.80636	4.42332	5.03402	4.68489	5.19552	5.90108	5.41807
ENSMUSG00000031772	777.67	707.235	914.082	841.184	1030.8	775.932	681.074	800.576	741.95	752.884	0.186521	0.0394536	0.894688	Cntnap4	8	112570043	112882717	+	6281	protein_coding	contactin associated protein-like 4 [Source:MGI Symbol;Acc:MGI:2183572]	-	809	721	1040	850	991	763	677	789	687	747	5.57253	5.0061	6.46716	5.97197	7.3119	5.46766	4.81088	5.68651	5.21779	5.30325
ENSMUSG00000006782	7117.27	7833.54	7396.15	7159.96	7098.04	8749.82	7949.55	7834.28	7867.7	7386.73	-0.120264	0.0151164	0.738112	Cnp	11	100574904	100591729	+	3639	protein_coding	2',3'-cyclic nucleotide 3' phosphodiesterase [Source:MGI Symbol;Acc:MGI:88437]	-	7404	7986	8415	7235	6824	8604	7902	7721	7285	7329	88.0272	95.7062	90.3194	87.7373	86.9045	106.42	96.9214	96.0481	95.5007	89.8077
ENSMUSG00000022748	167.262	147.136	123.049	172.195	140.421	165.763	184.101	171.48	185.758	187.465	-0.255715	0.0250881	0.845499	Cmss1	16	57302000	57606864	-	1997	protein_coding	cms small ribosomal subunit 1 [Source:MGI Symbol;Acc:MGI:1913747]	-	174	150	140	174	135	163	183	169	172	186	3.76967	3.27571	2.73816	3.84502	3.13286	3.6738	4.09014	3.83095	4.10875	4.15323
ENSMUSG00000028719	1273.69	1139.82	1259.5	1338.97	1210.74	1293.56	1426.53	1369.81	1385.62	1312.26	-0.125164	0.021682	0.819599	Cmpk1	4	114959336	114987241	-	3420	protein_coding	cytidine monophosphate (UMP-CMP) kinase 1 [Source:MGI Symbol;Acc:MGI:1913838]	-	1325	1162	1433	1353	1164	1272	1418	1350	1283	1302	16.7619	14.8174	16.3655	17.4582	15.7729	16.7404	18.5061	17.8692	17.8961	16.976
ENSMUSG00000034390	4137.32	3713.72	4188.96	3906.06	4248	3402.71	3383.24	3978.53	3443	3962.97	0.152299	0.0132777	0.708276	Cmip	8	117257064	117459430	+	6495	protein_coding	c-Maf inducing protein [Source:MGI Symbol;Acc:MGI:1921690]	-	4304	3786	4766	3947	4084	3346	3363	3921	3188	3932	28.6699	25.4211	28.6605	26.8173	29.1402	23.1874	23.1107	27.3285	23.4152	26.9951
ENSMUSG00000041216	310.491	335.471	328.718	342.412	293.325	228.813	280.679	320.636	253.797	290.268	0.228815	0.0174731	0.774253	Clvs1	4	9269293	9451691	+	7566	protein_coding	clavesin 1 [Source:MGI Symbol;Acc:MGI:1921688]	-	323	342	374	346	282	225	279	316	235	288	1.84701	1.9713	1.9307	2.01808	1.7273	1.33851	1.6459	1.89068	1.4817	1.69737
ENSMUSG00000004473	53.8313	68.6636	59.7669	41.5644	59.289	79.322	81.4874	68.9977	68.0391	78.6144	-0.411305	0.014456	0.719163	Clec11a	7	44302687	44306902	-	2978	protein_coding	C-type lectin domain family 11, member a [Source:MGI Symbol;Acc:MGI:1298219]	-	56	70	68	42	57	78	81	68	63	78	0.813572	1.0251	0.891853	0.622375	0.887024	1.1789	1.21402	1.03367	1.00919	1.16794
ENSMUSG00000037625	2664.65	2794.61	2604.25	2759.09	2410.05	3549.15	2803.77	2726.42	3041.24	2655.76	-0.159083	0.0341693	0.867101	Cldn11	3	31149920	31164324	+	1870	protein_coding	claudin 11 [Source:MGI Symbol;Acc:MGI:106925]	-	2772	2849	2963	2788	2317	3490	2787	2687	2816	2635	64.1334	66.4422	61.8869	65.7929	57.4209	84.002	66.5212	65.0464	71.8373	62.8333
ENSMUSG00000040663	32.6833	30.4082	31.6413	22.7615	24.9638	51.8644	47.2828	36.5282	33.4796	34.2678	-0.511801	0.0263464	0.845499	Clcf1	19	4214238	4223490	+	3713	protein_coding	cardiotrophin-like cytokine factor 1 [Source:MGI Symbol;Acc:MGI:1930088]	-	34	31	36	23	24	51	47	36	31	34	0.396174	0.364107	0.378692	0.273357	0.299552	0.618232	0.564986	0.438909	0.398287	0.408324
ENSMUSG00000061028	2201.32	2144.27	2187.64	2100.98	2199.93	2295.25	2222.29	2292.14	2232.33	2386.65	-0.0771313	0.0465292	0.916309	Clasrp	7	19581035	19604486	-	7614	protein_coding	CLK4-associating serine/arginine rich protein [Source:MGI Symbol;Acc:MGI:1855695]	-	2290	2186	2489	2123	2115	2257	2209	2259	2067	2368	13.0123	12.5207	12.7679	12.3045	12.8731	13.3421	12.9493	13.4308	12.9505	13.8682
ENSMUSG00000062248	15.3804	16.6754	11.426	13.8548	13.5221	30.5085	28.1685	16.2348	22.6797	26.2048	-0.808465	0.00710398	0.563875	Cks2	13	51645232	51650660	+	692	protein_coding	CDC28 protein kinase regulatory subunit 2 [Source:MGI Symbol;Acc:MGI:1913447]	-	16	17	13	14	13	30	28	16	21	26	1.00034	1.07136	0.733747	0.89279	0.870608	1.95129	1.806	1.04667	1.44768	1.6754
ENSMUSG00000000308	3729.74	3677.43	3384.74	3386.51	3595.83	3517.62	3866.13	3804.01	4211.95	3807.76	-0.111844	0.0331235	0.860175	Ckmt1	2	121357714	121363737	+	2496	protein_coding	creatine kinase, mitochondrial 1, ubiquitous [Source:MGI Symbol;Acc:MGI:99441]	-	3880	3749	3851	3422	3457	3459	3843	3749	3900	3778	67.2542	65.5034	60.2612	60.5011	64.186	62.3752	68.7212	67.9936	74.5382	67.4944
ENSMUSG00000034157	1854.3	1859.8	1757.85	1764.51	1803.63	1850.85	2007.01	1900.48	1920.22	1962.34	-0.0930427	0.0260212	0.845499	Cipc	12	86947043	86965362	+	4863	protein_coding	CLOCK interacting protein, circadian [Source:MGI Symbol;Acc:MGI:1919185]	-	1929	1896	2000	1783	1734	1820	1995	1873	1778	1947	17.1617	17.0031	16.0633	16.1799	16.5246	16.8451	18.3106	17.4354	17.4416	17.853
ENSMUSG00000019214	22.1093	22.5609	21.0942	50.4711	30.1646	42.7118	36.2166	38.5575	38.8795	54.4253	-0.531043	0.0461095	0.916309	Chtf18	17	25718926	25727419	-	4584	protein_coding	CTF18, chromosome transmission fidelity factor 18 [Source:MGI Symbol;Acc:MGI:2384887]	-	23	23	24	51	29	42	36	38	36	54	0.217078	0.218814	0.204492	0.490968	0.293183	0.412392	0.350528	0.375264	0.374642	0.525291
ENSMUSG00000031492	6.72892	14.7136	10.5471	7.91703	14.5622	203.39	34.2046	9.13205	20.5197	8.06301	-2.33846	0.00814601	0.605137	Chrnb3	8	27368711	27399730	+	6369	protein_coding	cholinergic receptor, nicotinic, beta polypeptide 3 [Source:MGI Symbol;Acc:MGI:106212]	-	7	15	12	8	14	200	34	9	19	8	0.047551	0.10271	0.07359	0.0554302	0.101869	1.4134	0.238272	0.0639689	0.142312	0.0560105
ENSMUSG00000001774	1557.26	2006.94	1894.96	1877.33	2024.15	1534.58	1606.61	1701.61	1786.3	1756.73	0.158596	0.0276586	0.845499	Chordc1	9	18292125	18317442	+	7498	protein_coding	cysteine and histidine-rich domain (CHORD)-containing, zinc-binding protein 1 [Source:MGI Symbol;Acc:MGI:1914167]	-	1620	2046	2156	1897	1946	1509	1597	1677	1654	1743	9.34764	11.9002	11.2308	11.1648	12.0277	9.05836	9.50658	10.1248	10.5232	10.3658
ENSMUSG00000038467	3265.45	3216.4	3126.34	2888.73	2938.45	3346.78	3247.43	3321.02	3697.87	3313.9	-0.132739	0.0095646	0.63551	Chmp4b	2	154651705	154694785	+	2027	protein_coding	charged multivesicular body protein 4B [Source:MGI Symbol;Acc:MGI:1922858]	-	3397	3279	3557	2919	2825	3291	3228	3273	3424	3288	72.5061	70.5473	68.5392	63.5489	64.5877	73.0769	71.0795	73.0953	80.5822	72.3317
ENSMUSG00000064246	212.441	193.239	190.727	201.884	190.349	217.627	229.372	231.345	215.997	234.835	-0.192246	0.0326637	0.860175	Chil1	1	134182176	134190181	+	2804	protein_coding	chitinase-like 1 [Source:MGI Symbol;Acc:MGI:1340899]	-	221	197	217	204	183	214	228	228	200	233	3.40994	3.06395	3.02267	3.21055	3.02453	3.43512	3.62929	3.6809	3.4026	3.70534
ENSMUSG00000014668	639.247	637.591	664.467	746.18	659.46	710.847	738.417	746.799	748.43	785.136	-0.156368	0.0112768	0.674665	Chfr	5	110135842	110171972	+	4437	protein_coding	checkpoint with forkhead and ring finger domains [Source:MGI Symbol;Acc:MGI:2444898]	-	665	650	756	754	634	699	734	736	693	779	6.48432	6.38876	6.6549	7.49911	6.62194	7.09077	7.38365	7.50906	7.4508	7.82886
ENSMUSG00000056201	11185.4	10458.4	9192.67	9978.43	9086.82	10725.8	11412.3	10313.1	12073.2	10789.3	-0.148516	0.0184917	0.777813	Cfl1	19	5490455	5495201	+	2354	protein_coding	cofilin 1, non-muscle [Source:MGI Symbol;Acc:MGI:101757]	-	11636	10662	10459	10083	8736	10547	11344	10164	11179	10705	213.86	197.526	173.537	189.021	171.985	201.664	215.092	195.459	226.545	202.783
ENSMUSG00000087408	1031.45	1166.3	1149.63	946.085	1121.29	861.355	911.452	1056.27	963.348	970.585	0.185248	0.0105987	0.655797	Cers1	8	70315775	70331592	+	3171	protein_coding	ceramide synthase 1 [Source:MGI Symbol;Acc:MGI:2136690]	-	1073	1189	1308	956	1078	847	906	1041	892	963	14.6398	16.3523	16.1109	13.3042	15.7546	12.0225	12.7525	14.8611	13.4192	13.5419
ENSMUSG00000026708	20.1867	31.3891	20.2153	25.7303	29.1244	35.5932	32.1926	41.6016	37.7995	32.2521	-0.507472	0.0318251	0.856052	Cenpl	1	161070713	161086724	+	5695	protein_coding	centromere protein L [Source:MGI Symbol;Acc:MGI:1917704]	-	21	32	23	26	28	35	32	41	35	32	0.159536	0.245047	0.15774	0.201469	0.22785	0.276618	0.250796	0.325902	0.293179	0.250557
ENSMUSG00000029177	13.4578	21.58	16.6996	8.90666	10.4016	29.4915	22.1324	22.3228	21.5997	22.1733	-0.723355	0.0204768	0.817511	Cenpa	5	30666777	30674830	+	5860	protein_coding	centromere protein A [Source:MGI Symbol;Acc:MGI:88375]	-	14	22	19	9	10	29	22	22	20	22	0.103362	0.163726	0.126638	0.0677755	0.0790838	0.222744	0.167567	0.16995	0.162814	0.167408
ENSMUSG00000023031	28.8382	23.5418	21.9731	37.6059	15.6024	46.7796	40.2407	35.5135	37.7995	31.2442	-0.585879	0.0208596	0.819153	Cela1	15	100674421	100687921	-	2306	protein_coding	chymotrypsin-like elastase family, member 1 [Source:MGI Symbol;Acc:MGI:95314]	-	30	24	25	38	15	46	40	35	35	31	0.562852	0.453884	0.423438	0.727197	0.301451	0.897851	0.774222	0.687078	0.724049	0.59945
ENSMUSG00000071226	71.1343	82.3963	101.955	114.797	84.2528	99.661	142.855	112.629	109.079	119.937	-0.361456	0.019784	0.813974	Cecr2	6	120666369	120771190	+	17082	protein_coding	CECR2, histone acetyl-lysine reader [Source:MGI Symbol;Acc:MGI:1923799]	-	74	84	116	116	81	98	142	111	101	119	0.187424	0.214454	0.265233	0.299672	0.219751	0.258222	0.371034	0.294159	0.28206	0.310641
ENSMUSG00000024081	541.197	634.648	636.342	659.093	649.059	563.389	565.382	593.583	539.993	551.309	0.148744	0.0285949	0.845499	Cebpz	17	78919006	78937066	-	4658	protein_coding	CCAAT/enhancer binding protein zeta [Source:MGI Symbol;Acc:MGI:109386]	-	563	647	724	666	624	554	562	585	500	547	5.22927	6.05756	6.07083	6.30961	6.20827	5.35323	5.3852	5.6853	5.1207	5.23647
ENSMUSG00000108307	3.84509	1.96182	2.63677	4.94814	0	1.01695	0	0	1.07999	0	2.6797	0.0394359	1	Ceacam-ps1	7	16648949	16657476	-	1066	transcribed_unprocessed_pseudogene	carcinoembryonic antigen-related cell adhesion molecule pseudogene 1 [Source:MGI Symbol;Acc:MGI:3610557]	-	4	2	3	5	0	1	0	0	1	0	0.162344	0.0818212	0.109919	0.206986	0	0.042223	0	0	0.0447509	0
ENSMUSG00000029330	1340.98	1493.92	1311.36	1392.41	1162.9	1569.15	1533.17	1395.17	1478.5	1473.52	-0.152449	0.0185247	0.777813	Cds1	5	101765130	101823858	+	3939	protein_coding	CDP-diacylglycerol synthase 1 [Source:MGI Symbol;Acc:MGI:1921846]	-	1395	1523	1492	1407	1118	1543	1524	1375	1369	1462	15.3222	16.8619	14.7942	15.7629	13.1535	17.6314	17.2689	15.8021	16.5797	16.5505
ENSMUSG00000023067	241.28	252.094	312.897	289.961	364.055	176.949	154.927	236.419	234.357	245.922	0.477844	0.000805794	0.233452	Cdkn1a	17	29090976	29100727	+	3553	protein_coding	cyclin-dependent kinase inhibitor 1A (P21) [Source:MGI Symbol;Acc:MGI:104556]	-	251	257	356	293	350	174	154	233	217	244	3.05641	3.1545	3.91348	3.63915	4.56518	2.20425	1.9346	2.96864	2.91356	3.06228
ENSMUSG00000029403	923.784	785.708	945.723	840.195	918.459	735.254	747.471	846.237	817.549	826.459	0.152329	0.0255261	0.845499	Cdkl2	5	92006074	92043883	-	6064	protein_coding	cyclin-dependent kinase-like 2 (CDC2-related kinase) [Source:MGI Symbol;Acc:MGI:1858227]	-	961	801	1076	849	883	723	743	834	757	820	6.85641	5.76058	6.93046	6.1784	6.74818	5.36642	5.46883	6.22593	5.95519	6.02983
ENSMUSG00000061048	1.92255	0.980909	2.63677	3.95852	3.12047	30.5085	5.03009	4.05869	4.31994	5.03938	-1.95983	0.00825096	1	Cdh3	8	106510891	106557297	+	4384	protein_coding	cadherin 3 [Source:MGI Symbol;Acc:MGI:88356]	-	2	1	3	4	3	30	5	4	4	5	0.0197375	0.00994769	0.0267276	0.040264	0.0317129	0.308004	0.0509054	0.0413035	0.043526	0.0508569
ENSMUSG00000030342	655.589	499.283	503.624	592.788	534.641	701.694	596.569	625.038	606.952	700.474	-0.214154	0.0133096	0.708276	Cd9	6	125460266	125494791	-	2044	protein_coding	CD9 antigen [Source:MGI Symbol;Acc:MGI:88348]	-	682	509	573	599	514	690	593	616	562	695	14.4356	10.86	10.9492	12.9322	11.6538	15.1941	12.9491	13.6426	13.1164	15.1619
ENSMUSG00000025351	1420.76	1151.59	1203.25	1252.87	1124.41	1488.81	1415.47	1324.15	1462.3	1410.02	-0.206375	0.00174391	0.352494	Cd63	10	128900989	128912822	+	3682	protein_coding	CD63 antigen [Source:MGI Symbol;Acc:MGI:99529]	-	1478	1174	1369	1266	1081	1464	1407	1305	1354	1399	17.3669	13.9052	14.5221	15.1732	13.6059	17.8963	17.0559	16.0444	17.5426	16.9428
ENSMUSG00000029084	318.182	417.867	415.731	343.401	406.702	295.932	320.92	328.754	354.235	299.339	0.250906	0.00854532	0.618413	Cd38	5	43868553	43912375	+	3890	protein_coding	CD38 antigen [Source:MGI Symbol;Acc:MGI:107474]	-	331	426	473	347	391	291	319	324	328	297	3.68138	4.77587	4.7492	3.93647	4.65814	3.36705	3.66021	3.77045	4.02238	3.40453
ENSMUSG00000025804	0.961274	0.980909	0	0	1.04016	9.15254	2.01204	3.04402	2.15997	0	-2.48273	0.0435935	1	Ccr1	9	123962124	123968692	-	2833	protein_coding	chemokine (C-C motif) receptor 1 [Source:MGI Symbol;Acc:MGI:104618]	-	1	1	0	0	1	9	2	3	2	0	0.0152716	0.0153938	0	0	0.0163583	0.142989	0.03151	0.0479371	0.0336777	0
ENSMUSG00000025010	172.068	181.468	147.659	157.351	152.903	168.813	223.336	175.538	200.877	231.812	-0.302663	0.0097015	0.63551	Ccnj	19	40831279	40848572	+	4355	protein_coding	cyclin J [Source:MGI Symbol;Acc:MGI:2443297]	-	179	185	168	159	147	166	222	173	186	230	1.77827	1.85258	1.50671	1.61115	1.56428	1.71564	2.27525	1.79827	2.03743	2.355
ENSMUSG00000070348	569.074	583.641	595.032	504.711	566.886	497.288	476.852	595.613	454.674	495.875	0.161783	0.0444075	0.913452	Ccnd1	7	144929931	144939925	-	4709	protein_coding	cyclin D1 [Source:MGI Symbol;Acc:MGI:88313]	-	592	595	677	510	545	489	474	587	421	492	5.43908	5.51037	5.61525	4.77935	5.36356	4.67397	4.49277	5.64296	4.26493	4.65894
ENSMUSG00000038292	16.3417	26.4845	21.9731	18.8029	33.2851	67.1186	35.2106	36.5282	23.7597	24.189	-0.681076	0.0318773	0.856052	Ccdc155	7	45183624	45204892	-	2365	protein_coding	coiled-coil domain containing 155 [Source:MGI Symbol;Acc:MGI:2687329]	-	17	27	25	19	32	66	35	36	22	24	0.310993	0.497881	0.412874	0.354528	0.627053	1.25608	0.660544	0.689079	0.443762	0.452513
ENSMUSG00000071104	9.61274	5.88545	14.0628	8.90666	11.4417	5.08474	8.04814	4.05869	3.23996	3.02363	1.08963	0.0297266	1	Ccdc110	8	45934619	45944145	+	2656	protein_coding	coiled-coil domain containing 110 [Source:MGI Symbol;Acc:MGI:2685018]	-	10	6	16	9	11	5	8	4	3	3	0.162894	0.0985181	0.235289	0.149535	0.191933	0.0847321	0.134439	0.0681757	0.053883	0.0503667
ENSMUSG00000029836	1175.64	1208.48	1212.92	1221.2	1067.2	1287.46	1303.8	1333.28	1315.42	1171.15	-0.122761	0.0281338	0.845499	Cbx3	6	51470360	51483704	+	5992	protein_coding	chromobox 3 [Source:MGI Symbol;Acc:MGI:108515]	-	1223	1232	1380	1234	1026	1266	1296	1314	1218	1162	8.83054	8.96668	8.99531	9.08805	7.93526	9.50972	9.65379	9.92707	9.69693	8.64739
ENSMUSG00000007655	208.596	178.525	181.059	167.247	184.108	227.796	230.378	255.697	220.317	188.473	-0.287779	0.00622401	0.529976	Cav1	6	17306335	17341452	+	3444	protein_coding	caveolin 1, caveolae protein [Source:MGI Symbol;Acc:MGI:102709]	-	217	182	206	169	177	224	229	252	204	187	2.72602	2.30463	2.33622	2.16546	2.38175	2.92746	2.96782	3.31234	2.8257	2.42119
ENSMUSG00000050623	54.7926	54.9309	36.0359	32.6578	37.4457	77.2881	64.3851	58.851	45.3594	63.4962	-0.52115	0.0131883	0.708276	Catsperz	19	6922426	6925380	-	781	protein_coding	cation channel sperm associated auxiliary subunit zeta [Source:MGI Symbol;Acc:MGI:1914327]	-	57	56	41	33	36	76	64	58	42	63	3.15759	3.12701	2.05041	1.86462	2.13617	4.37994	3.65758	3.36182	2.56541	3.597
ENSMUSG00000049676	184.565	181.468	209.184	159.33	192.429	153.559	135.812	149.157	130.678	154.205	0.358366	0.00113459	0.270172	Catsperg1	7	29181321	29214035	-	7044	protein_coding	cation channel sperm associated auxiliary subunit gamma 1 [Source:MGI Symbol;Acc:MGI:2443617]	-	192	185	238	161	185	151	135	147	121	153	1.17927	1.14537	1.31967	1.00864	1.21713	0.964858	0.855419	0.944703	0.819455	0.968552
ENSMUSG00000027187	921.861	851.429	868.378	868.894	757.235	983.389	995.958	828.987	963.348	923.215	-0.136935	0.0444846	0.913452	Cat	2	103453849	103485160	-	2613	protein_coding	catalase [Source:MGI Symbol;Acc:MGI:88271]	-	959	868	988	878	728	967	990	817	892	916	15.8786	14.4868	14.7682	14.828	12.9115	16.6569	16.9107	14.154	16.2849	15.6317
ENSMUSG00000015944	3915.27	4346.41	4289.15	3907.05	4211.6	3801.35	3612.61	4109.42	3640.63	3822.88	0.122491	0.013794	0.70848	Castor2	5	134099711	134144343	+	7560	protein_coding	cytosolic arginine sensor for mTORC1 subunit 2 [Source:MGI Symbol;Acc:MGI:1933384]	-	4073	4431	4880	3948	4049	3738	3591	4050	3371	3793	23.3091	25.5607	25.212	23.0453	24.8205	22.2548	21.2011	24.2511	21.2714	22.3724
ENSMUSG00000025076	72.0955	70.6254	54.4933	49.4814	47.8473	85.4237	77.4634	89.2912	85.3189	63.4962	-0.44338	0.0108532	0.659654	Casp7	19	56397129	56442344	+	2350	protein_coding	caspase 7 [Source:MGI Symbol;Acc:MGI:109383]	-	75	72	62	50	46	84	77	88	79	63	1.38078	1.33616	1.03046	0.938922	0.907142	1.60886	1.46247	1.69517	1.60368	1.19543
ENSMUSG00000031628	169.184	136.346	195.121	190.009	193.469	187.119	217.3	221.199	212.757	216.693	-0.254602	0.0231531	0.833379	Casp3	8	46617291	46639689	+	3357	protein_coding	caspase 3 [Source:MGI Symbol;Acc:MGI:107739]	-	176	139	222	192	186	184	216	218	197	215	2.26827	1.80574	2.58292	2.52393	2.56772	2.46702	2.87189	2.9397	2.79946	2.85587
ENSMUSG00000028463	24.0318	32.37	24.6099	38.5955	30.1646	50.8474	41.2467	38.5575	47.5194	29.2284	-0.471877	0.043213	0.905032	Car9	4	43506966	43513729	+	2304	protein_coding	carbonic anhydrase 9 [Source:MGI Symbol;Acc:MGI:2447188]	-	25	33	28	39	29	50	41	38	44	29	0.469451	0.624632	0.474662	0.746981	0.583312	0.976773	0.794266	0.746618	0.911023	0.561263
ENSMUSG00000044734	153.804	180.487	176.664	171.206	111.297	277.627	275.649	222.213	242.997	210.646	-0.629132	1.78852e-06	0.00541367	Serpinb1a	13	32842092	32851185	-	2303	protein_coding	serine (or cysteine) peptidase inhibitor, clade B, member 1a [Source:MGI Symbol;Acc:MGI:1913472]	-	160	184	201	173	107	273	274	219	225	209	3.00579	3.48431	3.40887	3.31497	2.15315	5.33549	5.31033	4.30475	4.66066	4.04672
ENSMUSG00000025575	1480.36	1397.79	1480.11	1405.27	1427.1	1291.52	1189.11	1435.76	1324.06	1398.93	0.115312	0.0400707	0.900166	Cant1	11	118406289	118419086	-	4358	protein_coding	calcium activated nucleotidase 1 [Source:MGI Symbol;Acc:MGI:1923275]	-	1540	1425	1684	1420	1372	1270	1182	1415	1226	1388	15.2885	14.26	15.0926	14.379	14.5899	13.1166	12.1058	14.6983	13.4203	14.2021
ENSMUSG00000014592	6601.07	7108.65	7323.2	7096.63	7189.57	6352.88	6590.42	7051.97	6680.79	6520.96	0.0894327	0.0315122	0.856052	Camta1	4	150917322	151861876	-	14570	protein_coding	calmodulin binding transcription activator 1 [Source:MGI Symbol;Acc:MGI:2140230]	CG-1	6867	7247	8332	7171	6912	6247	6551	6950	6186	6470	20.3911	21.6916	22.3356	21.7194	21.9852	19.2982	20.0684	21.5935	20.2539	19.8014
ENSMUSG00000019732	38.4509	41.1982	29.8834	42.554	29.1244	60	68.4092	38.5575	44.2794	48.3781	-0.520921	0.0174022	0.774253	Calr3	8	72424176	72443870	-	1962	protein_coding	calreticulin 3 [Source:MGI Symbol;Acc:MGI:1920566]	-	40	42	34	43	28	59	68	38	41	48	0.882051	0.933562	0.676844	0.967157	0.66137	1.3535	1.54694	0.876763	0.996882	1.09092
ENSMUSG00000003814	6994.23	7697.19	6826.61	6449.41	7376.8	6018.3	6299.68	6619.72	7093.35	6322.41	0.127571	0.0260739	0.845499	Calr	8	84841850	84846934	-	2880	protein_coding	calreticulin [Source:MGI Symbol;Acc:MGI:88252]	-	7276	7847	7767	6517	7092	5918	6262	6524	6568	6273	109.303	118.824	105.334	99.858	114.12	92.4886	97.0477	102.546	108.793	97.1255
ENSMUSG00000003657	4173.85	3407.68	4120.4	4368.22	4062.86	5156.95	4862.08	4290.03	4406.34	4190.75	-0.186174	0.010616	0.655797	Calb2	8	110137502	110168210	-	1743	protein_coding	calbindin 2 [Source:MGI Symbol;Acc:MGI:101914]	-	4342	3474	4688	4414	3906	5071	4833	4228	4080	4158	107.777	86.9211	105.051	111.754	103.853	130.949	123.761	109.808	111.666	106.375
ENSMUSG00000054793	5389.86	5326.33	4371.77	4878.87	4392.59	5085.76	5618.61	5075.39	5608.37	5381.05	-0.136097	0.0384994	0.891126	Cadm4	7	24482023	24504539	+	2161	protein_coding	cell adhesion molecule 4 [Source:MGI Symbol;Acc:MGI:2449088]	-	5607	5430	4974	4930	4223	5001	5585	5002	5193	5339	112.256	109.582	89.9	100.675	90.5632	104.162	115.354	104.782	114.636	110.168
ENSMUSG00000032076	4041.19	3718.62	4177.53	4389	4295.85	3797.29	3462.71	4185.52	3625.51	3699.92	0.135636	0.0223912	0.826383	Cadm1	9	47530173	47857637	+	10440	protein_coding	cell adhesion molecule 1 [Source:MGI Symbol;Acc:MGI:1889272]	-	4204	3791	4753	4435	4130	3734	3442	4125	3357	3671	17.4219	15.836	17.7818	18.7465	18.3331	16.0983	14.7155	17.8863	15.3394	15.6796
ENSMUSG00000022416	1616.86	1706.78	1800.92	1645.75	1804.67	1575.25	1502.99	1756.4	1480.66	1571.28	0.12063	0.0359401	0.88491	Cacna1i	15	80287238	80398279	+	9862	protein_coding	calcium channel, voltage-dependent, alpha 1I subunit [Source:MGI Symbol;Acc:MGI:2178051]	-	1682	1740	2049	1663	1735	1549	1494	1731	1371	1559	7.37893	7.69444	8.11495	7.4414	8.15304	7.06956	6.76161	7.94565	6.6318	7.04907
ENSMUSG00000024112	1515.93	1332.07	1569.76	1566.58	1728.74	1094.24	1337	1466.2	1334.86	1523.91	0.190926	0.0273764	0.845499	Cacna1h	17	25374285	25433783	-	9763	protein_coding	calcium channel, voltage-dependent, T type, alpha 1H subunit [Source:MGI Symbol;Acc:MGI:1928842]	-	1577	1358	1786	1583	1662	1076	1329	1445	1236	1512	6.98845	6.0661	7.14508	7.15526	7.8892	4.96061	6.07584	6.70011	6.0394	6.90588
ENSMUSG00000004113	3307.74	3422.39	3639.63	3557.72	3509.49	2988.81	3191.09	3317.98	3138.44	3493.3	0.112448	0.0214566	0.819599	Cacna1b	2	24603887	24763152	-	9942	protein_coding	calcium channel, voltage-dependent, N type, alpha 1B subunit [Source:MGI Symbol;Acc:MGI:88296]	-	3441	3489	4141	3595	3374	2939	3172	3270	2906	3466	14.9742	15.3045	16.2682	15.9571	15.7274	13.3055	14.2405	14.8892	13.9438	15.5455
ENSMUSG00000022440	26.9157	15.6945	24.6099	18.8029	20.8032	35.5932	26.1565	31.4548	34.5596	29.2284	-0.550485	0.030186	0.856052	C1qtnf6	15	78523346	78531416	-	2702	protein_coding	C1q and tumor necrosis factor related protein 6 [Source:MGI Symbol;Acc:MGI:1919959]	-	28	16	28	19	20	35	26	31	32	29	0.448338	0.258242	0.404745	0.31031	0.343028	0.583027	0.42949	0.519366	0.564968	0.47859
ENSMUSG00000039349	223.977	182.449	182.816	231.573	161.224	284.746	240.438	224.243	299.156	215.686	-0.363286	0.00392588	0.486127	C130074G19Rik	1	184871926	184883218	-	3035	protein_coding	RIKEN cDNA C130074G19 gene [Source:MGI Symbol;Acc:MGI:2444831]	-	233	186	208	234	155	280	239	221	277	214	3.32147	2.67268	2.67678	3.40239	2.36678	4.15246	3.51483	3.29633	4.35392	3.14417
ENSMUSG00000110027	64.4053	77.4918	70.314	90.0562	96.7347	106.78	117.704	82.1885	118.798	121.953	-0.459313	0.00365112	0.477199	C030029H02Rik	7	136268324	136318513	+	3792	lincRNA	RIKEN cDNA C030029H02 gene [Source:MGI Symbol;Acc:MGI:1924633]	-	67	79	80	91	93	105	117	81	110	121	0.764432	0.908556	0.824006	1.05901	1.13658	1.24631	1.37715	0.966972	1.38383	1.42288
ENSMUSG00000097874	0	0.980909	0.878925	0	0	6.10169	2.01204	0	1.07999	6.04726	-2.94542	0.0276984	1	C030010L15Rik	16	97994596	97997419	-	763	antisense	RIKEN cDNA C030010L15 gene [Source:MGI Symbol;Acc:MGI:1924562]	-	0	1	1	0	0	6	2	0	1	6	0	0.0571569	0.0511899	0	0	0.353942	0.116996	0	0.0625222	0.350653
ENSMUSG00000051223	2282.06	2379.68	2170.07	2329.59	2223.86	2423.39	2529.13	2309.39	2478.57	2413.86	-0.0944625	0.0280837	0.845499	Bzw1	1	58392898	58407353	+	4033	protein_coding	basic leucine zipper and W2 domains 1 [Source:MGI Symbol;Acc:MGI:1914132]	-	2374	2426	2469	2354	2138	2383	2514	2276	2295	2395	25.4674	26.2335	23.9112	25.7576	24.5677	26.5951	27.8229	25.5471	27.1465	26.4806
ENSMUSG00000098098	51.9088	42.1791	39.5516	48.4918	39.526	42.7118	30.1805	28.4108	30.2396	29.2284	0.462693	0.0305958	0.856052	Bvht	18	61639542	61647472	+	699	lincRNA	braveheart long non-coding RNA [Source:MGI Symbol;Acc:MGI:5434104]	-	54	43	45	49	38	42	30	28	28	29	3.34233	2.68277	2.51446	3.09347	2.51937	2.70444	1.91562	1.81334	1.91091	1.85
ENSMUSG00000073420	0.961274	10.79	11.426	7.91703	16.6425	5.08474	0	6.08803	0	2.01575	1.84734	0.017533	1	Btnl5-ps	17	34488070	34497429	-	2129	transcribed_unprocessed_pseudogene	butyrophilin-like 5, pseudogene [Source:MGI Symbol;Acc:MGI:1932037]	-	1	11	13	8	16	5	0	6	0	2	0.0203216	0.225325	0.238493	0.165822	0.348281	0.105706	0	0.127577	0	0.0418895
ENSMUSG00000021660	1598.6	1474.31	1582.94	1582.42	1685.06	1603.73	1686.09	1722.91	1775.5	1715.41	-0.102042	0.0361314	0.885095	Btf3	13	98309896	98317006	-	1739	protein_coding	basic transcription factor 3 [Source:MGI Symbol;Acc:MGI:1202875]	-	1663	1503	1801	1599	1620	1577	1676	1698	1644	1702	41.3738	37.6923	40.4504	40.5767	43.1719	40.8167	43.0169	44.2013	45.0984	43.6426
ENSMUSG00000038871	1021.83	1082.92	951.876	978.743	931.981	1138.98	1186.09	1067.44	1155.59	1027.03	-0.166388	0.00603348	0.529976	Bpgm	6	34476207	34505613	+	3588	protein_coding	2,3-bisphosphoglycerate mutase [Source:MGI Symbol;Acc:MGI:1098242]	-	1063	1104	1083	989	896	1120	1179	1052	1070	1019	12.8178	13.4187	11.7892	12.1639	11.5729	14.0498	14.6665	13.2727	14.2262	12.664
ENSMUSG00000045176	340.291	332.528	330.476	343.401	281.883	360	362.166	346.003	431.994	349.733	-0.181925	0.0369466	0.885852	Borcs6	11	69059717	69061578	+	1862	protein_coding	BLOC-1 related complex subunit 6 [Source:MGI Symbol;Acc:MGI:1919173]	-	354	339	376	347	271	354	360	341	400	347	8.22538	7.93986	7.88709	8.22389	6.74489	8.55716	8.62954	8.29033	10.248	8.30999
ENSMUSG00000040466	112.469	116.728	84.3768	82.1392	86.3331	130.169	128.77	105.526	98.2787	131.024	-0.302163	0.0425747	0.905032	Blvrb	7	27447978	27466144	+	2782	protein_coding	biliverdin reductase B (flavin reductase (NADPH)) [Source:MGI Symbol;Acc:MGI:2385271]	-	117	119	96	83	83	128	128	104	91	130	1.81954	1.86545	1.34779	1.31658	1.38263	2.0709	2.05361	1.69229	1.56043	2.08371
ENSMUSG00000024381	5904.14	6238.58	5636.54	6105.02	5741.67	6309.15	6468.69	6125.58	6207.76	6118.82	-0.0761793	0.0497017	0.925979	Bin1	18	32377217	32435736	+	2451	protein_coding	bridging integrator 1 [Source:MGI Symbol;Acc:MGI:108092]	-	6142	6360	6413	6169	5520	6204	6430	6037	5748	6071	108.417	113.164	102.194	111.071	104.371	113.929	117.093	111.5	111.875	110.45
ENSMUSG00000030256	869.953	759.223	813.005	853.06	817.564	934.576	895.356	920.308	934.188	963.53	-0.176444	0.00121912	0.28256	Bhlhe41	6	145858243	145865558	-	6720	protein_coding	basic helix-loop-helix family, member e41 [Source:MGI Symbol;Acc:MGI:1930704]	bHLH	905	774	925	862	786	919	890	907	865	956	5.82655	5.02302	5.37627	5.66064	5.42049	6.15534	5.91133	6.10992	6.14053	6.34365
ENSMUSG00000046598	615.215	604.24	588.001	628.414	558.565	612.203	707.23	673.742	644.752	637.986	-0.129561	0.0392807	0.894688	Bdh1	16	31422280	31458901	+	3888	protein_coding	3-hydroxybutyrate dehydrogenase, type 1 [Source:MGI Symbol;Acc:MGI:1919161]	-	640	616	669	635	537	602	703	664	597	633	7.12174	6.90951	6.72061	7.20734	6.40079	6.96909	8.07038	7.73106	7.32499	7.25986
ENSMUSG00000009681	2582.94	2536.63	2752.79	2608.66	2765.78	2235.25	2232.35	2673.66	2423.49	2595.28	0.123521	0.0354132	0.879496	Bcr	10	75060592	75184921	+	8191	protein_coding	breakpoint cluster region [Source:MGI Symbol;Acc:MGI:88141]	-	2687	2586	3132	2636	2659	2198	2219	2635	2244	2575	14.1926	13.7684	14.9346	14.2016	15.0441	12.078	12.0916	14.5627	13.0691	14.0182
ENSMUSG00000063382	1073.74	1117.25	1088.11	1059.89	1170.18	1064.75	1000.99	1032.94	921.228	1067.34	0.114133	0.0410929	0.905032	Bcl9l	9	44482825	44511896	+	7998	protein_coding	B cell CLL/lymphoma 9-like [Source:MGI Symbol;Acc:MGI:1933114]	-	1117	1139	1238	1071	1125	1047	995	1018	853	1059	6.04233	6.21062	6.04572	5.90929	6.51863	5.89211	5.55273	5.76187	5.08776	5.90426
ENSMUSG00000013523	2975.14	3702.93	3011.2	2818.46	2616	4034.23	3786.65	3374.8	3526.15	3156.67	-0.241333	0.00541774	0.51183	Bcas1	2	170346991	170427845	-	3775	protein_coding	breast carcinoma amplified sequence 1 [Source:MGI Symbol;Acc:MGI:1924210]	-	3095	3775	3426	2848	2515	3967	3764	3326	3265	3132	35.4712	43.6107	35.447	33.2928	30.875	47.2989	44.5038	39.8844	41.2596	36.9961
ENSMUSG00000004892	5796.48	6137.55	5706.86	5633.96	5657.42	5934.91	5884.2	6130.65	6448.6	6365.75	-0.0884917	0.0318192	0.856052	Bcan	3	87987531	88000230	-	4064	protein_coding	brevican [Source:MGI Symbol;Acc:MGI:1096385]	-	6030	6257	6493	5693	5439	5836	5849	6042	5971	6316	64.1943	67.1437	62.4023	61.818	62.0227	64.635	64.2381	67.3014	70.0894	69.3009
ENSMUSG00000037593	163.417	220.704	214.458	178.133	210.112	189.152	157.945	164.377	130.678	144.126	0.327046	0.00864748	0.620076	BC030499	11	78290841	78296805	+	4296	protein_coding	cDNA sequence BC030499 [Source:MGI Symbol;Acc:MGI:2652869]	-	170	225	244	180	202	186	157	162	121	143	1.71205	2.28408	2.21837	1.849	2.17908	1.94874	1.63117	1.70706	1.34363	1.4843
ENSMUSG00000097022	0.961274	0	0	0	1.04016	2.0339	3.01805	1.01467	5.39993	2.01575	-2.75899	0.0277418	1	BC001981	13	100106795	100108339	-	1545	antisense	cDNA sequence BC001981 [Source:MGI Symbol;Acc:MGI:3704411]	-	1	0	0	0	1	2	3	1	5	2	0.028003	0	0	0	0.0299956	0.058265	0.0866677	0.0293001	0.154383	0.0577234
ENSMUSG00000024844	410.464	434.543	399.032	387.934	398.38	438.305	443.654	408.913	476.274	486.804	-0.150418	0.0383513	0.891126	Banf1	19	5364641	5366645	-	820	protein_coding	barrier to autointegration factor 1 [Source:MGI Symbol;Acc:MGI:1346330]	-	427	443	454	392	383	431	441	403	441	483	22.5292	23.5604	21.6247	21.096	21.6456	23.6575	24.0043	22.2479	25.6557	26.2654
ENSMUSG00000025372	1105.46	1041.72	1241.04	1185.58	1397.97	889.83	826.947	1046.13	1063.79	1195.34	0.249829	0.0118003	0.683484	Baiap2	11	119942763	120006782	+	4992	protein_coding	brain-specific angiogenesis inhibitor 1-associated protein 2 [Source:MGI Symbol;Acc:MGI:2137336]	-	1150	1062	1412	1198	1344	875	822	1031	985	1186	9.9668	9.27775	11.0476	10.5903	12.477	7.88932	7.34957	9.34935	9.41284	10.594
ENSMUSG00000108847	49.025	39.2363	28.1256	49.4814	28.0843	64.0678	49.2949	59.8657	48.5994	44.3466	-0.45828	0.036451	0.885095	B830042I05Rik	8	11071046	11076881	+	1620	lincRNA	RIKEN cDNA B830042I05 gene [Source:MGI Symbol;Acc:MGI:1925942]	-	51	40	32	50	27	63	49	59	45	44	1.36203	1.07681	0.771514	1.36202	0.772385	1.75038	1.35004	1.64867	1.32512	1.21112
ENSMUSG00000051950	361.439	365.879	334.87	318.66	253.799	353.898	392.347	365.282	385.555	372.914	-0.192522	0.042827	0.905032	B3glct	5	149678230	149762599	+	4798	protein_coding	beta-3-glucosyltransferase [Source:MGI Symbol;Acc:MGI:2685903]	-	376	373	381	322	244	348	390	360	357	370	3.39047	3.39033	3.10151	2.96158	2.35676	3.26456	3.62801	3.39656	3.5495	3.43868
ENSMUSG00000109006	941.087	931.863	896.503	949.054	917.419	765.762	769.604	958.865	703.071	872.821	0.187216	0.0143211	0.718669	B230209E15Rik	7	61529871	61615327	-	1752	lincRNA	RIKEN cDNA B230209E15 gene [Source:MGI Symbol;Acc:MGI:2442668]	-	979	950	1020	959	882	753	765	945	651	866	24.1758	23.6473	22.7392	24.1553	23.3303	19.3449	19.4891	24.4172	17.7258	22.0412
ENSMUSG00000037053	1.92255	1.96182	7.91032	0.989629	2.08032	0	0	1.01467	1.07999	0	2.84165	0.0252257	1	Azgp1	5	137981520	137990233	+	1610	protein_coding	alpha-2-glycoprotein 1, zinc [Source:MGI Symbol;Acc:MGI:103163]	-	2	2	9	1	2	0	0	1	1	0	0.0537448	0.0541748	0.218336	0.0274095	0.0575691	0	0	0.0281172	0.0296301	0
ENSMUSG00000002602	1028.56	949.52	821.795	914.417	832.126	953.898	1081.47	981.188	1042.19	990.743	-0.151468	0.0291832	0.848908	Axl	7	25757273	25788705	-	5033	protein_coding	AXL receptor tyrosine kinase [Source:MGI Symbol;Acc:MGI:1347244]	-	1070	968	935	924	800	938	1075	967	965	983	9.19791	8.38767	7.25594	8.10163	7.36628	8.38845	9.53336	8.69755	9.14659	8.70918
ENSMUSG00000000142	790.167	814.154	688.198	792.693	677.143	932.542	906.422	763.034	774.35	863.75	-0.17288	0.0263444	0.845499	Axin2	11	108920349	108950783	+	5506	protein_coding	axin 2 [Source:MGI Symbol;Acc:MGI:1270862]	-	822	830	783	801	651	917	901	752	717	857	6.45904	6.57408	5.55436	6.41984	5.47936	7.49616	7.30387	6.18271	6.21215	6.94057
ENSMUSG00000037727	8251.57	5635.32	7835.61	7244.08	7866.71	4277.29	2832.95	4608.64	6038.2	6523.99	0.601201	0.00525387	0.508839	Avp	2	130580620	130582554	-	577	protein_coding	arginine vasopressin [Source:MGI Symbol;Acc:MGI:88121]	-	8584	5745	8915	7320	7563	4206	2816	4542	5591	6473	643.645	434.217	603.468	559.839	607.44	328.095	217.832	356.343	462.245	500.242
ENSMUSG00000021460	1000.69	1004.45	940.45	926.293	872.692	1063.73	979.861	979.159	1045.43	1065.33	-0.113175	0.0470275	0.916309	Auh	13	52835119	52929681	-	9580	protein_coding	AU RNA binding protein/enoyl-coenzyme A hydratase [Source:MGI Symbol;Acc:MGI:1338011]	-	1041	1024	1070	936	839	1046	974	965	968	1057	4.7013	4.66152	4.36242	4.31159	4.05865	4.91442	4.53793	4.55994	4.82024	4.91994
ENSMUSG00000037685	3632.65	3607.78	4397.26	4229.67	4334.34	3638.64	3495.91	3874.02	3790.75	3555.79	0.138373	0.0303364	0.856052	Atp8a1	5	67618140	67847434	-	14278	protein_coding	ATPase, aminophospholipid transporter (APLT), class I, type 8A, member 1 [Source:MGI Symbol;Acc:MGI:1330848]	-	3779	3678	5003	4274	4167	3578	3475	3818	3510	3528	11.451	11.2341	13.6859	13.2098	13.5251	11.2792	10.8631	12.105	11.7273	11.0182
ENSMUSG00000034566	2805.96	2709.27	2577.01	2519.59	2450.61	2817.96	2742.4	2767.01	2947.28	2745.46	-0.101765	0.0300962	0.856052	Atp5h	11	115415689	115419962	-	1465	protein_coding	ATP synthase, H+ transporting, mitochondrial F0 complex, subunit D [Source:MGI Symbol;Acc:MGI:1918929]	-	2919	2762	2932	2546	2356	2771	2726	2727	2729	2724	86.2043	82.2203	78.1691	76.6917	74.5286	85.1343	83.0525	84.2645	88.8638	82.9125
ENSMUSG00000026463	2584.87	2363.01	2977.8	2917.43	3210.97	2178.3	2259.52	2889.79	2255.01	2441.08	0.225013	0.011591	0.678408	Atp2b4	1	133699457	133801041	-	12248	protein_coding	ATPase, Ca++ transporting, plasma membrane 4 [Source:MGI Symbol;Acc:MGI:88111]	-	2689	2409	3388	2948	3087	2142	2246	2848	2088	2422	9.49857	8.57757	10.8041	10.6216	11.6804	7.87155	8.18482	10.5262	8.1325	8.81779
ENSMUSG00000038094	623.867	841.62	810.369	578.933	663.621	622.372	565.382	648.376	536.753	506.962	0.289372	0.00653765	0.541162	Atp13a4	16	29395853	29544864	-	6230	protein_coding	ATPase type 13A4 [Source:MGI Symbol;Acc:MGI:1924456]	-	649	858	922	585	638	612	562	639	497	503	4.50702	6.00609	5.78032	4.14377	4.74589	4.4215	4.02636	4.64312	3.80564	3.60023
ENSMUSG00000028373	1284.26	1189.84	1176	1198.44	1397.97	1099.32	1157.93	1187.17	1173.94	1128.82	0.119578	0.0394768	0.894688	Astn2	4	65380803	66404611	-	4959	protein_coding	astrotactin 2 [Source:MGI Symbol;Acc:MGI:1889277]	-	1336	1213	1338	1211	1344	1081	1151	1170	1087	1120	11.6559	10.6674	10.5383	10.7765	12.56	9.81155	10.3597	10.6804	10.4567	10.071
ENSMUSG00000020774	337.407	333.509	314.655	300.847	309.967	492.203	433.594	355.135	354.235	340.662	-0.307872	0.00311105	0.447712	Aspa	11	73304992	73329596	-	5954	protein_coding	aspartoacylase [Source:MGI Symbol;Acc:MGI:87914]	-	351	340	358	304	298	484	431	350	328	338	2.55053	2.49036	2.34846	2.25316	2.31949	3.65883	3.23097	2.66107	2.62799	2.53139
ENSMUSG00000034768	114.392	147.136	137.991	122.714	116.498	160.678	148.891	171.48	155.518	150.174	-0.299049	0.00934663	0.628017	Asb16	11	102268743	102279462	+	2843	protein_coding	ankyrin repeat and SOCS box-containing 16 [Source:MGI Symbol;Acc:MGI:2654437]	-	119	150	157	124	112	158	148	169	144	149	1.81093	2.30095	2.15691	1.92474	1.82569	2.50142	2.32354	2.69096	2.41627	2.33701
ENSMUSG00000026311	1067.98	1007.39	1045.04	1032.18	1097.37	936.61	911.452	899	1065.95	1001.83	0.125143	0.0330481	0.860175	Asb1	1	91540544	91559589	+	6432	protein_coding	ankyrin repeat and SOCS box-containing 1 [Source:MGI Symbol;Acc:MGI:1929735]	-	1111	1027	1189	1043	1055	921	906	886	987	994	7.4731	6.96333	7.22012	7.15593	7.60137	6.44495	6.28705	6.2357	7.32032	6.89114
ENSMUSG00000020604	578.687	472.798	437.705	546.275	438.947	608.135	590.532	596.627	596.152	584.568	-0.266488	0.0012748	0.287791	Arsg	11	109473374	109573330	+	3906	protein_coding	arylsulfatase G [Source:MGI Symbol;Acc:MGI:1921258]	-	602	482	498	552	422	598	587	588	552	580	6.66802	5.38155	4.97973	6.23641	5.00686	6.89088	6.70765	6.81463	6.74164	6.62135
ENSMUSG00000055116	543.12	689.579	573.059	526.483	576.247	500.339	514.075	464.72	508.673	485.797	0.233678	0.00303293	0.447299	Arntl	7	113207465	113314126	+	7523	protein_coding	aryl hydrocarbon receptor nuclear translocator-like [Source:MGI Symbol;Acc:MGI:1096381]	bHLH	565	703	652	532	554	492	511	458	471	482	3.2493	4.07528	3.38505	3.12067	3.41275	2.94361	3.03176	2.75595	2.98668	2.85698
ENSMUSG00000029404	647.898	585.602	632.826	596.746	617.854	622.372	700.188	672.728	711.711	691.403	-0.140849	0.0212618	0.819599	Arl6ip4	5	124116089	124118196	+	1442	protein_coding	ADP-ribosylation factor-like 6 interacting protein 4 [Source:MGI Symbol;Acc:MGI:1929500]	-	674	597	720	603	594	612	696	663	659	686	20.2221	18.0552	19.5019	18.4535	19.09	19.1026	21.5431	20.8135	21.8011	21.2134
ENSMUSG00000040964	1158.33	1071.15	1027.46	1056.92	1067.2	1138.98	1184.08	1160.79	1198.78	1116.73	-0.108048	0.0317057	0.856052	Arhgef10l	4	140514485	140666012	-	5693	protein_coding	Rho guanine nucleotide exchange factor (GEF) 10-like [Source:MGI Symbol;Acc:MGI:1920004]	-	1205	1092	1169	1068	1026	1120	1177	1144	1110	1108	9.15753	8.36516	8.02014	8.27861	8.35202	8.85488	9.22784	9.09667	9.30124	8.67859
ENSMUSG00000031355	633.479	530.672	778.727	727.377	704.187	533.898	482.889	607.789	598.312	624.884	0.245367	0.015842	0.754471	Arhgap6	X	168795099	169304435	+	12128	protein_coding	Rho GTPase activating protein 6 [Source:MGI Symbol;Acc:MGI:1196332]	-	659	541	886	735	677	525	480	599	554	620	2.35087	1.94536	2.85334	2.6744	2.58693	1.94839	1.76651	2.23581	2.17911	2.27957
ENSMUSG00000024411	1483.25	1231.04	1405.4	1831.8	1403.17	2145.76	1836.99	1701.61	1680.46	1844.41	-0.32457	0.000555833	0.215179	Aqp4	18	15389394	15403684	-	5082	protein_coding	aquaporin 4 [Source:MGI Symbol;Acc:MGI:107387]	-	1543	1255	1599	1851	1349	2110	1826	1677	1556	1830	13.136	10.7697	12.2892	16.0731	12.3016	18.6876	16.0373	14.9381	14.6061	16.0571
ENSMUSG00000071847	397.006	307.024	229.399	264.231	228.835	405.762	391.341	338.901	357.475	353.765	-0.372994	0.00511189	0.508839	Apcdd1	18	62922327	62953195	+	2799	protein_coding	adenomatosis polyposis coli down-regulated 1 [Source:MGI Symbol;Acc:MGI:3513977]	-	413	313	261	267	220	399	389	334	331	351	6.38381	4.87679	3.64205	4.20955	3.64255	6.41617	6.20314	5.40183	5.64136	5.59184
ENSMUSG00000036291	382.587	503.206	452.646	500.752	508.637	417.966	403.413	437.324	395.275	432.379	0.169157	0.046976	0.916309	Ap5m1	14	49066097	49094234	+	11392	protein_coding	adaptor-related protein complex 5, mu 1 subunit [Source:MGI Symbol;Acc:MGI:1921635]	-	398	513	515	506	489	411	401	431	366	429	1.51153	1.96386	1.7657	1.9601	1.98927	1.62386	1.57112	1.71267	1.53264	1.67922
ENSMUSG00000024480	813.238	847.505	739.176	786.755	744.753	892.881	903.404	933.498	903.948	860.727	-0.193284	0.000666553	0.223084	Ap3s1	18	46741876	46790826	+	2011	protein_coding	adaptor-related protein complex 3, sigma 1 subunit [Source:MGI Symbol;Acc:MGI:1337062]	-	846	864	841	795	716	878	898	920	837	854	18.2008	18.7368	16.334	17.4455	16.5001	19.6512	19.931	20.7097	19.8551	18.9364
ENSMUSG00000021686	814.199	884.78	816.521	783.786	805.082	767.796	784.694	719.403	762.47	760.947	0.113019	0.0419175	0.905032	Ap3b1	13	94358960	94566317	+	4548	protein_coding	adaptor-related protein complex 3, beta 1 subunit [Source:MGI Symbol;Acc:MGI:1333879]	-	847	902	929	792	774	755	780	709	706	755	8.05741	8.64926	7.97819	7.6848	7.88689	7.47192	7.65489	7.05705	7.40531	7.40248
ENSMUSG00000035189	355.671	380.593	375.301	382.986	344.292	427.118	488.925	413.986	426.594	421.292	-0.243818	0.00103045	0.252286	Ano4	10	88948994	89344762	-	7265	protein_coding	anoctamin 4 [Source:MGI Symbol;Acc:MGI:2443344]	-	370	388	427	387	331	420	486	408	395	418	2.20343	2.3291	2.29563	2.35073	2.11143	2.60207	2.98583	2.54227	2.5937	2.56561
ENSMUSG00000002289	85.5534	153.022	143.265	67.2948	125.859	95.5932	79.4754	77.1151	69.1191	50.3938	0.630088	0.00472619	0.486127	Angptl4	17	33773750	33781575	-	3286	protein_coding	angiopoietin-like 4 [Source:MGI Symbol;Acc:MGI:1888999]	-	89	156	163	68	121	94	79	76	64	50	1.1718	2.07038	1.93744	0.913206	1.70649	1.28756	1.07306	1.04699	0.929119	0.678505
ENSMUSG00000035048	375.858	308.986	300.592	314.702	286.043	371.186	329.974	337.886	406.075	358.804	-0.184523	0.0446637	0.913452	Anapc13	9	102626296	102634425	+	2377	protein_coding	anaphase promoting complex subunit 13 [Source:MGI Symbol;Acc:MGI:1916260]	-	391	315	342	318	275	365	328	333	376	356	7.11672	5.77929	5.6196	5.90372	5.36153	6.91146	6.15899	6.3418	7.54601	6.67839
ENSMUSG00000032593	126.888	138.308	116.897	104.901	102.976	89.4915	84.5055	94.3645	106.919	72.5671	0.400313	0.00517596	0.508839	Amigo3	9	108053159	108055701	+	2543	protein_coding	adhesion molecule with Ig like domain 3 [Source:MGI Symbol;Acc:MGI:2444854]	-	132	141	133	106	99	88	84	93	99	72	2.24574	2.41805	2.04274	1.83945	1.80416	1.55755	1.47434	1.65552	1.85715	1.26252
ENSMUSG00000028766	209.558	139.289	130.081	184.071	160.184	259.322	238.426	169.45	211.677	216.693	-0.413621	0.00411703	0.486127	Alpl	4	137741733	137796384	-	4033	protein_coding	alkaline phosphatase, liver/bone/kidney [Source:MGI Symbol;Acc:MGI:87983]	-	218	142	148	186	154	255	237	167	196	215	2.33863	1.53551	1.43332	2.03522	1.76961	2.84589	2.62292	1.8745	2.31839	2.37717
ENSMUSG00000028028	54.7926	73.5681	58.888	65.3155	47.8473	100.678	92.5536	53.7776	60.4792	94.7404	-0.42176	0.0364346	0.885095	Alpk1	3	127670310	127780527	-	6868	protein_coding	alpha-kinase 1 [Source:MGI Symbol;Acc:MGI:1918731]	-	57	75	67	66	46	99	92	53	56	94	0.359068	0.476238	0.381025	0.424074	0.310394	0.6488	0.597891	0.349336	0.388971	0.610307
ENSMUSG00000055471	466.218	515.958	518.566	443.354	463.91	383.39	391.341	496.175	396.355	457.576	0.18085	0.0377022	0.887644	Alk	17	71868972	72604627	-	7755	protein_coding	anaplastic lymphoma kinase [Source:MGI Symbol;Acc:MGI:103305]	-	485	526	590	448	446	377	389	489	367	454	2.70578	2.95799	2.97152	2.54932	2.66525	2.18809	2.23889	2.85446	2.25758	2.61051
ENSMUSG00000021238	1371.74	1528.26	1505.6	1408.24	1543.59	1399.32	1373.21	1315.02	1216.06	1292.1	0.157295	0.00445282	0.486127	Aldh6a1	12	84430717	84451004	-	5784	protein_coding	aldehyde dehydrogenase family 6, subfamily A1 [Source:MGI Symbol;Acc:MGI:1915077]	-	1427	1558	1713	1423	1484	1376	1365	1296	1126	1282	10.674	11.7471	11.5675	10.8569	11.8902	10.7077	10.5334	10.1432	9.28686	9.88349
ENSMUSG00000035936	2165.75	2325.73	2310.69	2371.15	2335.15	2103.05	2107.61	2236.34	2134.05	2195.16	0.0946941	0.0223133	0.826383	Aldh5a1	13	24907579	24937661	-	5647	protein_coding	aldhehyde dehydrogenase family 5, subfamily A1 [Source:MGI Symbol;Acc:MGI:2441982]	-	2253	2371	2629	2396	2245	2068	2095	2204	1976	2178	17.2614	18.3108	18.1837	18.7239	18.424	16.4831	16.5589	17.6682	16.6928	17.1985
ENSMUSG00000022636	2337.82	2113.86	2504.06	2352.35	2739.78	2302.37	1840.01	2439.27	2140.53	2088.32	0.15629	0.0498082	0.925979	Alcam	16	52248996	52454074	-	7121	protein_coding	activated leukocyte cell adhesion molecule [Source:MGI Symbol;Acc:MGI:1313266]	-	2432	2155	2849	2377	2634	2264	1829	2404	1982	2072	14.7759	13.1977	15.6264	14.7304	17.1419	14.3101	11.464	15.2824	13.2777	12.9748
ENSMUSG00000071551	1.92255	2.94273	7.0314	0	10.4016	0	1.00602	0	1.07999	3.02363	2.12245	0.0494911	1	Akr1c19	13	4228700	4252843	+	5892	protein_coding	aldo-keto reductase family 1, member C19 [Source:MGI Symbol;Acc:MGI:2653678]	-	2	3	8	0	10	0	1	0	1	3	0.0146859	0.022205	0.0530318	0	0.0786543	0	0.00757534	0	0.00809648	0.0227044
ENSMUSG00000052131	0	0	0	0	0	0	3.01805	2.02934	3.23996	2.01575	-3.52941	0.0190399	1	Akr1b7	6	34412334	34423142	+	1281	protein_coding	aldo-keto reductase family 1, member B7 [Source:MGI Symbol;Acc:MGI:101918]	-	0	0	0	0	0	0	3	2	3	2	0	0	0	0	0	0	0.104529	0.070677	0.11172	0.0696196
ENSMUSG00000039166	632.518	603.259	652.162	630.394	653.219	581.695	589.526	596.627	579.953	563.403	0.123705	0.0307724	0.856052	Akap7	10	25169090	25307870	-	4375	protein_coding	A kinase (PRKA) anchor protein 7 [Source:MGI Symbol;Acc:MGI:1859150]	-	658	615	742	637	628	572	586	588	537	559	6.50699	6.13042	6.62422	6.42523	6.65222	5.88469	5.97839	6.0841	5.85538	5.6975
ENSMUSG00000022016	3143.37	3335.09	3448.9	3320.2	3347.23	3147.46	3168.96	3178.97	3181.64	3098.21	0.0732425	0.0447887	0.913452	Akap11	14	78492246	78536808	-	11015	protein_coding	A kinase (PRKA) anchor protein 11 [Source:MGI Symbol;Acc:MGI:2684060]	-	3270	3400	3924	3355	3218	3095	3150	3133	2946	3074	12.8439	13.4613	13.914	13.4411	13.539	12.6468	12.7641	12.8758	12.7587	12.4443
ENSMUSG00000091636	91.321	124.575	91.4082	95.994	89.4536	164.746	140.842	100.453	100.439	113.89	-0.333469	0.041985	0.905032	Akain1	17	69439326	69489233	+	2620	protein_coding	A kinase (PRKA) anchor inhibitor 1 [Source:MGI Symbol;Acc:MGI:2444600]	-	95	127	104	97	86	162	140	99	93	113	1.56875	2.11395	1.55039	1.6338	1.52119	2.78304	2.38502	1.71053	1.69333	1.92321
ENSMUSG00000024782	1220.82	1439.97	1512.63	1324.12	1402.13	1256.95	1259.53	1197.31	1154.51	1242.71	0.175248	0.00440153	0.486127	Ak3	19	29020833	29047961	-	3120	protein_coding	adenylate kinase 3 [Source:MGI Symbol;Acc:MGI:1860835]	-	1270	1468	1721	1338	1348	1236	1252	1180	1069	1233	17.6109	20.5194	21.5444	18.9247	20.0226	17.8308	17.9108	17.1208	16.3449	17.6222
ENSMUSG00000078139	5.76764	2.94273	2.63677	6.9274	7.28111	32.5424	48.2889	6.08803	4.31994	8.06301	-1.96788	0.00206296	0.38482	AK157302	13	21495223	21497146	+	1924	protein_coding	cDNA sequence AK157302 [Source:MGI Symbol;Acc:MGI:3574096]	-	6	3	3	7	7	32	48	6	4	8	0.134921	0.068	0.0609011	0.160554	0.168608	0.748602	1.11353	0.14117	0.0991777	0.185411
ENSMUSG00000000731	5.76764	4.90454	18.4574	9.89629	9.36142	3.05085	5.03009	7.10271	4.31994	1.00788	1.2472	0.030366	1	Aire	10	78030022	78043610	-	3825	protein_coding	autoimmune regulator (autoimmune polyendocrinopathy candidiasis ectodermal dystrophy) [Source:MGI Symbol;Acc:MGI:1338803]	SAND	6	5	21	10	9	3	5	7	4	1	0.067866	0.0570074	0.214436	0.115371	0.109043	0.0353017	0.0583449	0.0828446	0.049887	0.0116579
ENSMUSG00000037860	56.7151	27.4654	67.6772	47.5022	43.6866	71.1864	76.4573	71.0271	55.0793	68.5356	-0.489767	0.0204327	0.817511	Aim2	1	173350879	173466040	+	3501	protein_coding	absent in melanoma 2 [Source:MGI Symbol;Acc:MGI:2686159]	-	59	28	77	48	42	70	76	70	51	68	0.729109	0.348786	0.859028	0.60503	0.555959	0.899936	0.968916	0.905114	0.694924	0.866099
ENSMUSG00000053297	862.263	952.462	800.701	829.309	867.492	694.576	727.351	847.251	809.99	762.963	0.166331	0.0167868	0.774199	AI854703	6	48626764	48633689	+	4306	protein_coding	expressed sequence AI854703 [Source:MGI Symbol;Acc:MGI:2141510]	-	897	971	911	838	834	683	723	835	750	757	9.01262	9.83418	8.26329	8.58811	8.97589	7.13925	7.49426	8.77829	8.30895	7.83921
ENSMUSG00000062753	525.817	463.97	407.821	440.385	437.906	483.051	552.304	512.409	560.513	533.167	-0.215094	0.00641082	0.535766	AI413582	17	27563573	27565756	-	1912	protein_coding	expressed sequence AI413582 [Source:MGI Symbol;Acc:MGI:2146839]	-	547	473	464	445	421	475	549	505	519	529	12.3775	10.7886	9.47849	10.2707	10.2042	11.1818	12.8159	11.9564	12.9491	12.3373
ENSMUSG00000031980	4629.49	4866.29	5444.94	4474.11	4830.49	4226.44	4075.38	4696.92	4687.14	4627.16	0.120042	0.0483908	0.924604	Agt	8	124556534	124569706	-	1891	protein_coding	angiotensinogen (serpin peptidase inhibitor, clade A, member 8) [Source:MGI Symbol;Acc:MGI:87963]	-	4816	4961	6195	4521	4644	4156	4051	4629	4340	4591	110.186	114.412	127.955	105.504	113.811	98.9213	95.6171	110.814	109.486	108.26
ENSMUSG00000005705	113.43	102.015	117.776	67.2948	126.899	64.0678	69.4152	70.0124	88.5589	72.5671	0.534361	0.00217343	0.395987	Agrp	8	105566698	105637393	-	1013	protein_coding	agouti related neuropeptide [Source:MGI Symbol;Acc:MGI:892013]	-	118	104	134	68	122	63	69	69	82	72	5.0397	4.47731	5.16659	2.96229	5.5813	2.79922	3.04022	3.08345	3.86156	3.16938
ENSMUSG00000055013	3531.72	3679.39	3674.78	3689.34	3661.36	3442.37	3390.28	3563.53	3377.12	3534.62	0.0753029	0.0280262	0.845499	Agap1	1	89454806	89897617	+	17559	protein_coding	ArfGAP with GTPase domain, ankyrin repeat and PH domain 1 [Source:MGI Symbol;Acc:MGI:2653690]	-	3674	3751	4181	3728	3520	3385	3370	3512	3127	3507	9.05257	9.31623	9.30013	9.36923	9.29027	8.6769	8.56633	9.05424	8.49546	8.90608
ENSMUSG00000038302	240.318	298.196	246.978	236.521	228.835	206.441	218.306	230.331	225.717	216.693	0.189261	0.0490814	0.925979	Afg1l	10	42312585	42478565	-	2705	protein_coding	AFG1 like ATPase [Source:MGI Symbol;Acc:MGI:2148801]	-	250	304	281	239	220	203	217	227	209	215	3.99858	4.90116	4.0574	3.89904	3.76913	3.37781	3.58061	3.79888	3.68585	3.54423
ENSMUSG00000068036	1526.5	1531.2	1709.51	1668.51	1789.07	1535.59	1511.04	1541.29	1484.98	1570.27	0.105571	0.0490221	0.925979	Afdn	17	13760539	13906150	+	10223	protein_coding	afadin, adherens junction formation factor [Source:MGI Symbol;Acc:MGI:1314653]	-	1588	1561	1945	1686	1720	1510	1502	1519	1375	1558	6.72055	6.65913	7.43105	7.27791	7.79714	6.64821	6.55777	6.72631	6.41628	6.79579
ENSMUSG00000042558	437.38	419.829	429.794	440.385	456.629	486.101	481.883	480.955	530.273	502.93	-0.184635	0.00443375	0.486127	Adprhl2	4	126316047	126321703	-	2475	protein_coding	ADP-ribosylhydrolase like 2 [Source:MGI Symbol;Acc:MGI:2140364]	-	455	428	489	445	439	478	479	474	491	499	7.95369	7.54156	7.71689	7.93437	8.22005	8.69278	8.63823	8.66963	9.46379	8.99034
ENSMUSG00000028138	828.618	751.376	733.023	742.222	717.709	795.254	846.061	835.075	839.149	839.561	-0.138978	0.0143009	0.718669	Adh5	3	138443093	138455499	+	5408	protein_coding	alcohol dehydrogenase 5 (class III), chi polypeptide [Source:MGI Symbol;Acc:MGI:87929]	-	862	766	834	750	690	782	841	823	777	833	6.89609	6.1771	6.02335	6.12001	5.91286	6.50843	6.94103	6.88907	6.85399	6.86845
ENSMUSG00000037605	1105.46	1208.48	1356.18	1277.61	1292.92	1160.34	1121.71	1152.67	1144.79	1131.85	0.128147	0.0272508	0.845499	Adgrl3	5	81020138	81825133	+	17750	protein_coding	adhesion G protein-coupled receptor L3 [Source:MGI Symbol;Acc:MGI:2441950]	-	1150	1232	1543	1291	1243	1141	1115	1136	1060	1123	2.80306	3.02695	3.39529	3.20963	3.24532	2.8933	2.80376	2.89719	2.84883	2.82119
ENSMUSG00000028184	1782.2	1821.55	1894.96	1882.27	1851.48	1745.08	1723.31	1737.12	1637.26	1834.34	0.0893391	0.0420093	0.905032	Adgrl2	3	148815583	148990555	-	14198	protein_coding	adhesion G protein-coupled receptor L2 [Source:MGI Symbol;Acc:MGI:2139714]	-	1854	1857	2156	1902	1780	1716	1713	1712	1516	1820	5.64957	5.70397	5.93103	5.91168	5.81003	5.43996	5.38511	5.45851	5.09367	5.71604
ENSMUSG00000031949	272.04	276.616	301.471	258.293	287.084	257.288	235.408	238.448	262.437	231.812	0.189093	0.0268109	0.845499	Adat1	8	111966908	111992302	-	4399	protein_coding	adenosine deaminase, tRNA-specific 1 [Source:MGI Symbol;Acc:MGI:1353631]	-	283	282	343	261	276	253	234	235	243	230	2.78333	2.79568	3.04543	2.61827	2.90764	2.58864	2.37425	2.41831	2.63519	2.33144
ENSMUSG00000027951	4138.28	4261.07	4361.22	4063.42	4283.37	3651.86	3755.46	4216.98	3710.83	3926.69	0.131998	0.00456837	0.486127	Adar	3	89715022	89753446	+	8118	protein_coding	adenosine deaminase, RNA-specific [Source:MGI Symbol;Acc:MGI:1889575]	-	4305	4344	4962	4106	4118	3591	3733	4156	3436	3896	22.9433	23.3364	23.8735	22.3202	23.5084	19.91	20.5245	23.1752	20.1912	21.4003
ENSMUSG00000020709	83.6308	71.6063	73.8297	75.2118	65.5299	99.661	102.614	73.0564	105.839	110.866	-0.410401	0.00670266	0.550516	Adap2	11	80154105	80178958	+	1785	protein_coding	ArfGAP with dual PH domains 2 [Source:MGI Symbol;Acc:MGI:2663075]	-	87	73	84	76	63	98	102	72	98	110	2.10869	1.78352	1.83802	1.8789	1.63564	2.47112	2.55051	1.82596	2.61907	2.74793
ENSMUSG00000015850	297.034	298.196	246.978	332.515	235.076	425.084	360.154	311.504	336.956	270.111	-0.273438	0.0282774	0.845499	Adamtsl4	3	95676201	95687917	-	4198	protein_coding	ADAMTS-like 4 [Source:MGI Symbol;Acc:MGI:2389008]	-	309	304	281	336	226	418	358	307	312	268	3.18455	3.15809	2.6144	3.53203	2.49489	4.48167	3.80632	3.3105	3.54545	2.84671
ENSMUSG00000053441	17.3029	64.74	28.1256	33.6474	39.526	53.8983	84.5055	42.6162	57.2393	57.449	-0.692851	0.0160799	0.761626	Adamts19	18	58836764	59053678	+	4666	protein_coding	a disintegrin-like and metallopeptidase (reprolysin type) with thrombospondin type 1 motif, 19 [Source:MGI Symbol;Acc:MGI:2442875]	-	18	66	32	34	38	53	84	42	53	57	0.166902	0.616868	0.267864	0.32156	0.377419	0.511254	0.803525	0.407476	0.541864	0.544729
ENSMUSG00000000532	2443.56	2452.27	2415.29	2352.35	2289.39	2171.19	2243.42	2373.32	2224.77	2282.84	0.0817824	0.046418	0.916309	Acvr1b	15	101174067	101213684	+	4418	protein_coding	activin A receptor, type 1B [Source:MGI Symbol;Acc:MGI:1338944]	-	2542	2500	2748	2377	2201	2135	2230	2339	2060	2265	24.8933	24.6778	24.294	23.7428	23.0876	21.7509	22.5291	23.9663	22.2434	22.8609
ENSMUSG00000015143	959.351	822.001	928.145	922.334	1018.31	798.305	801.796	830.002	828.349	952.443	0.142784	0.0417526	0.905032	Actn1	12	80167547	80260371	-	5533	protein_coding	actinin, alpha 1 [Source:MGI Symbol;Acc:MGI:2137706]	-	998	838	1056	932	979	785	797	818	767	945	7.80373	6.60505	7.45439	7.43332	8.19988	6.38579	6.42928	6.69253	6.61293	7.61591
ENSMUSG00000078129	34.6059	48.0645	34.2781	30.6785	22.8835	99.661	44.2648	37.5429	48.5994	58.4568	-0.757421	0.00623761	0.529976	Actl10	2	154551776	154553276	+	1501	protein_coding	actin-like 10 [Source:MGI Symbol;Acc:MGI:1917612]	-	36	49	39	31	22	98	44	37	45	58	1.03766	1.42367	1.01483	0.911399	0.679246	2.93867	1.30839	1.11588	1.43018	1.72305
ENSMUSG00000028405	540.236	534.595	624.916	569.037	549.203	592.881	658.942	632.141	598.312	606.742	-0.131546	0.0455714	0.916309	Aco1	4	40143081	40198338	+	4496	protein_coding	aconitase 1 [Source:MGI Symbol;Acc:MGI:87879]	-	562	545	711	575	528	583	655	623	554	602	5.40807	5.28644	6.17664	5.64377	5.44243	5.83644	6.50249	6.27277	5.87817	5.97064
ENSMUSG00000020917	3972.94	4007.01	3989.44	4050.55	3982.76	4377.96	4080.41	4297.14	4371.78	4281.46	-0.0979272	0.00321898	0.447712	Acly	11	100476353	100528000	-	5279	protein_coding	ATP citrate lyase [Source:MGI Symbol;Acc:MGI:103251]	-	4133	4085	4539	4093	3829	4305	4056	4235	4048	4248	33.8724	33.7469	33.5828	34.2151	33.6139	36.7052	34.2934	36.3161	36.5803	35.8826
ENSMUSG00000050063	76.9019	51.9882	50.9776	97.9733	52.0079	218.644	142.855	133.937	149.038	116.914	-1.20772	6.51527e-09	0.000113255	Klk6	7	43824499	43832030	+	1513	protein_coding	kallikrein related-peptidase 6 [Source:MGI Symbol;Acc:MGI:1343166]	-	80	53	58	99	50	215	142	132	138	116	2.28762	1.52767	1.49726	2.88751	1.5315	6.39596	4.18904	3.94941	4.3511	3.41877
ENSMUSG00000020681	764.213	673.884	748.844	725.398	773.877	650.847	544.256	709.256	655.552	667.214	0.192012	0.00916963	0.628017	Ace	11	105967945	105989964	+	5287	protein_coding	angiotensin I converting enzyme (peptidyl-dipeptidase A) 1 [Source:MGI Symbol;Acc:MGI:87874]	-	795	687	852	733	744	640	541	699	607	662	6.50564	5.66683	6.29418	6.11818	6.52152	5.4485	4.56723	5.98501	5.47694	5.58341
ENSMUSG00000116641	47.1024	72.5872	75.5875	70.2636	49.9276	58.983	44.2648	59.8657	32.3996	33.2599	0.464153	0.0387669	0.89437	AC165271.1	16	94721894	94753438	+	1200	antisense	novel transcript, antisense to Kcnj6	-	49	74	86	71	48	58	44	59	30	33	1.76664	2.68933	2.79915	2.61099	1.85373	2.17547	1.63658	2.22571	1.19261	1.22626
ENSMUSG00000116793	47.1024	16.6754	21.9731	25.7303	21.8433	49.8305	61.3671	45.6603	29.1596	34.2678	-0.725285	0.0138263	0.70848	AC161376.2	16	31590196	31593220	-	1615	lincRNA	novel transcript	-	49	17	25	26	21	49	61	45	27	34	1.31267	0.45906	0.604611	0.710442	0.602604	1.36562	1.68586	1.26136	0.797536	0.938765
ENSMUSG00000115263	24.0318	19.6182	21.9731	24.7407	13.5221	76.2711	39.2347	25.3668	21.5997	19.1497	-0.804798	0.0279646	0.845499	AC154683.1	14	122365239	122406743	-	1284	antisense	novel transcript, antisense to Clybl	-	25	20	25	25	13	75	39	25	20	19	0.842379	0.679294	0.760473	0.859216	0.469206	2.62907	1.3557	0.881399	0.74306	0.659841
ENSMUSG00000114491	0	0	0	0	0	2.0339	1.00602	3.04402	5.39993	2.01575	-3.91571	0.00337136	1	AC133598.1	13	39791438	39844840	+	2364	processed_transcript	novel transcript	-	0	0	0	0	0	2	1	3	5	2	0	0	0	0	0	0.0380793	0.0188807	0.0574475	0.100898	0.0377253
ENSMUSG00000116753	4.80637	7.84727	3.5157	0	4.16063	8.13559	16.0963	6.08803	7.5599	8.06301	-1.1784	0.0413437	1	AC133505.1	16	90548633	90550609	-	1423	lincRNA	novel transcript	-	5	8	4	0	4	8	16	6	7	8	0.152019	0.245176	0.10979	0	0.130269	0.253041	0.501857	0.190873	0.234667	0.250689
ENSMUSG00000117023	0.961274	1.96182	0.878925	2.96889	1.04016	0	0	0	0	0	3.04737	0.0460307	1	AC107792.1	17	73494251	73521142	+	568	antisense	novel transcript, antisense to Galnt14	-	1	2	1	3	1	0	0	0	0	0	0.07617	0.153559	0.0687639	0.233078	0.08159	0	0	0	0	0
ENSMUSG00000023088	476.792	478.683	497.471	509.659	477.432	452.542	457.738	436.309	453.594	432.379	0.12865	0.0422534	0.905032	Abcc1	16	14361558	14475737	+	15092	protein_coding	ATP-binding cassette, sub-family C (CFTR/MRP), member 1 [Source:MGI Symbol;Acc:MGI:102676]	-	496	488	566	515	459	445	455	430	420	429	1.42189	1.41015	1.4648	1.50587	1.40946	1.32715	1.34564	1.28979	1.32758	1.26754
ENSMUSG00000024130	2272.45	2306.12	2343.21	2247.45	2145.85	2040	2125.72	2207.93	2004.45	2179.03	0.100194	0.0241457	0.840277	Abca3	17	24351950	24410201	+	8797	protein_coding	ATP-binding cassette, sub-family A (ABC1), member 3 [Source:MGI Symbol;Acc:MGI:1351617]	-	2364	2351	2666	2271	2063	2006	2113	2176	1856	2162	11.6264	11.655	11.8368	11.3923	10.868	10.2637	10.7209	11.1975	10.0647	10.959
ENSMUSG00000057880	11250.7	11098	10783.5	11116.5	11179.6	9450.5	10187.9	11464.8	10023.4	10627.1	0.0989155	0.0433382	0.905032	Abat	16	8513429	8621568	+	7748	protein_coding	4-aminobutyrate aminotransferase [Source:MGI Symbol;Acc:MGI:2443582]	-	11704	11314	12269	11233	10748	9293	10127	11299	9281	10544	65.3548	63.6824	61.8484	63.9784	64.287	53.9849	58.3386	66.0158	57.1431	60.6829
ENSMUSG00000044522	8.65146	40.2173	38.6727	13.8548	22.8835	18.3051	7.04212	9.13205	15.1198	13.1024	0.991819	0.0205553	0.81765	A730020M07Rik	3	121634936	121643485	-	2687	lincRNA	RIKEN cDNA A730020M07 gene [Source:MGI Symbol;Acc:MGI:2442643]	-	9	41	44	14	22	18	7	9	14	13	0.144913	0.66544	0.639579	0.229926	0.379438	0.301516	0.116277	0.151625	0.248553	0.215738
ENSMUSG00000109321	181.681	195.201	203.032	217.718	202.831	186.102	174.041	171.48	147.958	175.371	0.225386	0.025887	0.845499	A330076H08Rik	7	61930137	61982358	-	4448	processed_transcript	RIKEN cDNA A330076H08 gene [Source:MGI Symbol;Acc:MGI:2443193]	-	189	199	231	220	195	183	173	169	137	174	1.83836	1.95111	2.02841	2.18266	2.03168	1.85179	1.73599	1.71996	1.46931	1.74436
ENSMUSG00000113186	79.7857	97.11	55.3723	97.9733	53.0481	111.864	107.644	104.511	125.278	130.016	-0.596789	0.00079134	0.233452	A330076C08Rik	13	44185760	44216487	-	6641	lincRNA	RIKEN cDNA A330076C08 gene [Source:MGI Symbol;Acc:MGI:2443693]	-	83	99	63	99	51	110	107	103	116	129	0.540726	0.650122	0.370524	0.657854	0.355895	0.74553	0.719142	0.702103	0.833266	0.866178
ENSMUSG00000111994	24.9931	29.4273	21.0942	31.6681	38.4858	61.0169	46.2768	40.5869	48.5994	49.386	-0.762916	0.000601645	0.217883	A330049N07Rik	10	72973303	73086705	-	2619	lincRNA	RIKEN cDNA A330049N07 gene [Source:MGI Symbol;Acc:MGI:3041175]	-	26	30	24	32	37	60	46	40	45	49	0.429507	0.49955	0.357919	0.53919	0.654714	1.03115	0.783948	0.691388	0.819664	0.834279
ENSMUSG00000030111	276.847	367.841	297.956	201.884	299.565	261.356	208.246	182.641	222.477	210.646	0.412256	0.00305139	0.447299	A2m	6	121635376	121679227	+	7021	protein_coding	alpha-2-macroglobulin [Source:MGI Symbol;Acc:MGI:2449119]	-	288	375	339	204	288	257	207	180	206	209	1.7747	2.3293	1.88586	1.28221	1.90099	1.64756	1.31594	1.16057	1.39967	1.32739
ENSMUSG00000109122	68.2504	61.7972	82.6189	74.2222	97.7748	120	99.5958	84.2178	77.759	101.796	-0.331758	0.0462176	0.916309	A230103L15Rik	7	59327318	59331189	-	3872	TEC	RIKEN cDNA A230103L15 gene [Source:MGI Symbol;Acc:MGI:1925005]	-	71	63	94	75	94	118	99	83	72	101	0.793333	0.709575	0.948203	0.854778	1.12507	1.37168	1.14121	0.970376	0.887066	1.16315
ENSMUSG00000105891	64.4053	51.0073	47.4619	79.1703	63.4496	86.4406	101.608	93.3498	68.0391	87.6853	-0.521721	0.00282649	0.447299	A230001M10Rik	3	102262405	102445132	+	2310	lincRNA	RIKEN cDNA A230001M10 gene [Source:MGI Symbol;Acc:MGI:2443043]	-	67	52	54	80	61	85	101	92	63	87	1.25486	0.981712	0.913042	1.52829	1.22378	1.6562	1.95152	1.80291	1.30103	1.67941
ENSMUSG00000113880	17.3029	12.7518	11.426	9.89629	9.36142	18.3051	15.0903	28.4108	21.5997	18.1418	-0.737998	0.0265548	0.845499	A030005L19Rik	1	82913325	82914130	+	806	protein_coding	RIKEN cDNA A030005L19 gene [Source:MGI Symbol;Acc:MGI:1925172]	-	18	13	13	10	9	18	15	28	20	18	0.966207	0.703398	0.629966	0.547511	0.517479	1.00518	0.830655	1.57261	1.18373	0.995837
ENSMUSG00000102964	4.80637	0	0	0	1.04016	10.1695	5.03009	1.01467	4.31994	5.03938	-2.13461	0.0317884	1	9430034N14Rik	1	156026223	156030007	-	3785	TEC	RIKEN cDNA 9430034N14 gene [Source:MGI Symbol;Acc:MGI:2444791]	-	5	0	0	0	1	10	5	1	4	5	0.0571527	0	0	0	0.0122439	0.118916	0.0589615	0.01196	0.0504142	0.0589054
ENSMUSG00000105851	9.61274	9.80909	11.426	10.8859	7.28111	22.3729	17.1023	10.1467	28.0796	14.1103	-0.896682	0.0161662	0.763636	9130604C24Rik	5	137502673	137503628	+	956	lincRNA	RIKEN cDNA 9130604C24 gene [Source:MGI Symbol;Acc:MGI:1924957]	-	10	10	13	11	7	22	17	10	26	14	0.452558	0.456179	0.531122	0.507765	0.339333	1.03579	0.793699	0.473521	1.2974	0.653011
ENSMUSG00000054672	0.961274	7.84727	3.5157	0	2.08032	1.01695	0	0	0	1.00788	2.78232	0.0401897	1	5830411N06Rik	7	140247284	140300736	+	5532	protein_coding	RIKEN cDNA 5830411N06 gene [Source:MGI Symbol;Acc:MGI:2443685]	-	1	8	4	0	2	1	0	0	0	1	0.00782079	0.0630668	0.0282414	0	0.0167546	0.00813624	0	0	0	0.00806062
ENSMUSG00000099170	0	3.92363	1.75785	2.96889	1.04016	9.15254	6.03611	8.11738	2.15997	3.02363	-1.56057	0.040016	1	5730403I07Rik	9	77366412	77399418	-	2033	lincRNA	RIKEN cDNA 5730403I07 gene [Source:MGI Symbol;Acc:MGI:1917737]	-	0	4	2	3	1	9	6	8	2	3	0	0.0858056	0.0384239	0.0651196	0.0227954	0.199256	0.131728	0.178135	0.0469301	0.0658013
ENSMUSG00000013158	20.1867	10.79	12.3049	12.8652	11.4417	1.01695	4.02407	3.04402	7.5599	4.03151	1.79181	0.000353381	0.186146	4933405L10Rik	8	105707655	105710246	+	1487	protein_coding	RIKEN cDNA 4933405L10 gene [Source:MGI Symbol;Acc:MGI:1918296]	-	21	11	14	13	11	1	4	3	7	4	0.611	0.322608	0.367727	0.385798	0.342821	0.0302688	0.120064	0.0913288	0.224567	0.11995
ENSMUSG00000031938	428.728	334.49	346.296	381.007	376.537	457.627	445.666	465.735	393.115	369.891	-0.192169	0.0350913	0.877685	4931406C07Rik	9	15283337	15306448	-	10871	protein_coding	RIKEN cDNA 4931406C07 gene [Source:MGI Symbol;Acc:MGI:1918234]	-	446	341	394	385	362	450	443	459	364	367	1.775	1.36797	1.41558	1.56286	1.54321	1.86315	1.81886	1.91135	1.59732	1.50538
ENSMUSG00000110629	1.92255	2.94273	2.63677	4.94814	2.08032	8.13559	13.0782	6.08803	5.39993	5.03938	-1.3808	0.0218739	1	4930567H12Rik	8	125584632	125625605	+	2010	lincRNA	RIKEN cDNA 4930567H12 gene [Source:MGI Symbol;Acc:MGI:1923181]	-	2	3	3	5	2	8	13	6	5	5	0.0430493	0.0650906	0.0582954	0.109775	0.0461126	0.179143	0.288677	0.13513	0.118668	0.110924
ENSMUSG00000074039	49.9862	52.9691	52.7355	48.4918	58.2488	36.6101	32.1926	47.6896	35.6395	45.3545	0.408489	0.0334614	0.860175	4930520O04Rik	9	114368303	114377229	+	3745	processed_transcript	RIKEN cDNA 4930520O04 gene [Source:MGI Symbol;Acc:MGI:1922366]	-	52	54	60	49	56	36	32	47	33	45	0.600737	0.628832	0.625761	0.577393	0.692981	0.43267	0.381384	0.568124	0.42036	0.535811
ENSMUSG00000107622	2.88382	0.980909	1.75785	2.96889	2.08032	8.13559	6.03611	10.1467	3.23996	5.03938	-1.61709	0.015634	1	4930512J16Rik	6	89269511	89285725	-	1974	lincRNA	RIKEN cDNA 4930512J16 gene [Source:MGI Symbol;Acc:MGI:1922381]	-	3	1	2	3	2	8	6	10	3	5	0.0657516	0.0220925	0.0395723	0.0670659	0.0469535	0.18241	0.135665	0.229324	0.0724992	0.112947
ENSMUSG00000102224	0.961274	1.96182	4.39462	4.94814	6.24095	23.3898	14.0842	11.1614	3.23996	7.05514	-1.6794	0.00550147	1	4930447F24Rik	9	108133718	108138567	+	1503	processed_transcript	RIKEN cDNA 4930447F24 gene [Source:MGI Symbol;Acc:MGI:1924123]	-	1	2	5	5	6	23	14	11	3	7	0.0287855	0.0580315	0.129933	0.146804	0.185003	0.688771	0.415751	0.331307	0.0952185	0.207678
ENSMUSG00000097004	31.722	17.6564	21.0942	16.8237	27.0441	9.15254	13.0782	18.2641	11.8798	12.0945	0.824831	0.0117873	0.683484	4731419I09Rik	3	89337850	89347831	+	2820	antisense	RIKEN cDNA 4731419I09 gene [Source:MGI Symbol;Acc:MGI:3704222]	-	33	18	24	17	26	9	13	18	11	12	0.506288	0.278366	0.332408	0.266028	0.427277	0.143648	0.205759	0.288949	0.186081	0.18975
ENSMUSG00000106485	2.88382	8.82818	5.27355	2.96889	0	2.0339	0	0	1.07999	0	2.69903	0.0248846	1	3830422I06Rik	3	38418971	38420151	-	1181	TEC	RIKEN cDNA 3830422I06 gene [Source:MGI Symbol;Acc:MGI:1917958]	-	3	9	6	3	0	2	0	0	1	0	0.109902	0.332342	0.198431	0.112098	0	0.076223	0	0	0.0403933	0
ENSMUSG00000033731	23.0706	18.6373	15.8206	13.8548	21.8433	36.6101	35.2106	26.3815	25.9197	19.1497	-0.623351	0.0278136	0.845499	3300002A11Rik	12	99341154	99361827	+	726	antisense	RIKEN cDNA 3300002A11 gene [Source:MGI Symbol;Acc:MGI:1919073]	-	24	19	18	14	21	36	35	26	24	19	1.43023	1.14133	0.968378	0.850979	1.3405	2.23188	2.15177	1.62119	1.57701	1.16699
ENSMUSG00000105771	0	0	0	0.989629	2.08032	6.10169	6.03611	0	4.31994	1.00788	-2.55888	0.0409623	1	2900064K03Rik	5	49515825	49518937	-	3113	TEC	RIKEN cDNA 2900064K03 gene [Source:MGI Symbol;Acc:MGI:1920226]	-	0	0	0	1	2	6	6	0	4	1	0	0	0	0.0141758	0.0297739	0.0867517	0.0860274	0	0.0612971	0.0143242
ENSMUSG00000051339	876.682	926.959	834.979	822.382	846.689	787.118	806.826	810.723	737.63	835.53	0.114342	0.0467735	0.916309	2900026A02Rik	5	113086323	113221236	-	10814	protein_coding	RIKEN cDNA 2900026A02 gene [Source:MGI Symbol;Acc:MGI:1920194]	-	912	945	950	831	814	774	802	799	683	829	3.64872	3.81099	3.4312	3.39111	3.48838	3.22152	3.31019	3.3447	3.01296	3.41837
ENSMUSG00000091474	323.949	339.394	362.996	361.215	344.292	280.678	263.577	335.857	289.436	331.591	0.206392	0.0177078	0.774253	2610021A01Rik	7	41599230	41628533	+	4857	protein_coding	RIKEN cDNA 2610021A01 gene [Source:MGI Symbol;Acc:MGI:1922662]	zf-C2H2	337	346	413	365	331	276	262	331	268	329	3.00189	3.10671	3.32117	3.31629	3.15824	2.55768	2.40767	3.08501	2.63224	3.0205
ENSMUSG00000100303	11.5353	5.88545	9.66817	10.8859	4.16063	50.8474	8.04814	14.2054	9.71987	8.06301	-1.1055	0.0433177	0.905032	2600014E21Rik	2	75138843	75317820	+	7972	lincRNA	RIKEN cDNA 2600014E21 gene [Source:MGI Symbol;Acc:MGI:1919384]	-	12	6	11	11	4	50	8	14	9	8	0.0651248	0.0328229	0.0538932	0.060891	0.0232529	0.282299	0.0447906	0.0794984	0.053856	0.044748
ENSMUSG00000021458	410.464	325.662	388.485	364.183	392.14	439.322	453.714	397.752	404.995	435.403	-0.18025	0.0234138	0.836726	2010111I01Rik	13	62964893	63326096	+	11294	protein_coding	RIKEN cDNA 2010111I01 gene [Source:MGI Symbol;Acc:MGI:1919311]	-	427	332	442	368	377	432	451	392	375	432	1.63573	1.28199	1.52856	1.4379	1.54696	1.72164	1.78235	1.57122	1.58395	1.70564
ENSMUSG00000100860	0	3.92363	2.63677	1.97926	4.16063	1.01695	0	0	0	1.00788	2.59357	0.0481174	1	2010009K17Rik	2	158070367	158091797	-	567	antisense	RIKEN cDNA 2010009K17 gene [Source:MGI Symbol;Acc:MGI:1919590]	-	0	4	3	2	4	1	0	0	0	1	0	0.307659	0.206656	0.155659	0.326936	0.0793821	0	0	0	0.0786444
ENSMUSG00000101970	318.182	285.444	304.108	300.847	322.449	326.44	364.178	353.106	358.555	349.733	-0.19477	0.0101211	0.639764	1810026B05Rik	7	73539203	73558395	-	8620	processed_transcript	RIKEN cDNA 1810026B05 gene [Source:MGI Symbol;Acc:MGI:1916420]	-	331	291	346	304	310	321	362	348	332	347	1.66132	1.47224	1.56775	1.5563	1.66663	1.67611	1.87442	1.82755	1.83734	1.79503
ENSMUSG00000100147	383.548	316.833	331.355	383.976	357.814	532.881	479.87	354.121	390.955	364.851	-0.259803	0.0229213	0.833379	1700047M11Rik	1	182287990	182303325	+	2846	lincRNA	RIKEN cDNA 1700047M11 gene [Source:MGI Symbol;Acc:MGI:1914580]	-	399	323	377	388	344	524	477	349	362	362	6.06555	4.94949	5.17387	6.01623	5.60156	8.28709	7.4808	5.55121	6.06782	5.67184
ENSMUSG00000044916	94.2048	86.32	98.4396	77.191	101.935	73.2203	58.349	66.9684	79.919	82.6459	0.344644	0.0235589	0.837472	1700029I15Rik	2	92382538	92385708	+	1348	protein_coding	RIKEN cDNA 1700029I15 gene [Source:MGI Symbol;Acc:MGI:1916742]	-	98	88	112	78	98	72	58	66	74	82	3.14535	2.84699	3.24517	2.55348	3.36916	2.40408	1.92045	2.21642	2.61879	2.71253
ENSMUSG00000072473	13.4578	7.84727	5.27355	14.8444	10.4016	32.5424	18.1083	19.2788	14.0398	15.1182	-0.94368	0.0132421	0.708276	1700024G13Rik	14	32376068	32388391	-	850	protein_coding	RIKEN cDNA 1700024G13 gene [Source:MGI Symbol;Acc:MGI:1914335]	-	14	8	6	15	10	32	18	19	13	15	0.712593	0.410453	0.275703	0.778753	0.545213	1.69448	0.945188	1.01189	0.729598	0.786906
ENSMUSG00000019797	299.917	291.33	261.92	255.324	281.883	304.068	326.956	302.372	322.916	297.324	-0.160504	0.0493587	0.925979	1700021F05Rik	10	43525133	43540994	-	4141	protein_coding	RIKEN cDNA 1700021F05 gene [Source:MGI Symbol;Acc:MGI:1915101]	-	312	297	298	258	271	299	325	298	299	295	3.25973	3.12784	2.81073	2.74943	3.03284	3.24991	3.50302	3.25768	3.44449	3.17664
ENSMUSG00000085416	3.84509	0.980909	1.75785	1.97926	9.36142	0	0	1.01467	1.07999	1.00788	2.52796	0.0296317	1	1700019G24Rik	6	5963909	5977393	-	503	antisense	RIKEN cDNA 1700019G24 gene [Source:MGI Symbol;Acc:MGI:1919499]	-	4	1	2	2	9	0	0	1	1	1	0.344052	0.0867012	0.1553	0.175465	0.829201	0	0	0.0899973	0.0948399	0.0886508
ENSMUSG00000085102	3.84509	0	1.75785	2.96889	4.16063	1.01695	1.00602	0	0	0	2.59633	0.0479282	1	1700010K24Rik	3	108248909	108256985	-	226	antisense	RIKEN cDNA 1700010K24 gene [Source:MGI Symbol;Acc:MGI:1922690]	-	4	0	2	3	4	1	1	0	0	0	0.765745	0	0.345645	0.585788	0.820232	0.199158	0.197495	0	0	0
ENSMUSG00000094732	9.61274	7.84727	9.66817	4.94814	10.4016	30.5085	19.1143	19.2788	23.7597	8.06301	-1.24285	0.00187642	0.366492	1500015L24Rik	19	20405288	20422787	+	780	lincRNA	RIKEN cDNA 1500015L24 gene [Source:MGI Symbol;Acc:MGI:1916244]	-	10	8	11	5	10	30	19	19	22	8	0.554674	0.447289	0.550816	0.28288	0.594143	1.73114	1.08724	1.1027	1.34551	0.457347

## Sheet: iWAT
gene_id	iW6	iW7	iW8	iW9	iW10	iW1	iW2	iW3	iW4	iW5	log2FoldChange	pvalue	padj	gene_name	gene_chr	gene_start	gene_end	gene_strand	gene_length	gene_biotype	gene_description	tf_family	iW6_readcount	iW7_readcount	iW8_readcount	iW9_readcount	iW10_readcount	iW1_readcount	iW2_readcount	iW3_readcount	iW4_readcount	iW5_readcount	iW6_fpkm	iW7_fpkm	iW8_fpkm	iW9_fpkm	iW10_fpkm	iW1_fpkm	iW2_fpkm	iW3_fpkm	iW4_fpkm	iW5_fpkm
ENSMUSG00000050321	5.8053	0.963707	3.99159	2.05457	2.9303	0	0	0	0	0	4.09753	0.0035374	1	Neto1	18	86394952	86501897	+	3531	protein_coding	neuropilin (NRP) and tolloid (TLL)-like 1 [Source:MGI Symbol;Acc:MGI:2180216]	-	6	1	4	2	3	0	0	0	0	0	0.0700739	0.0119637	0.0497487	0.0262068	0.0370147	0	0	0	0	0
ENSMUSG00000085102	1.9351	1.92741	3.99159	3.08185	0.976766	0	0	0	0	0	3.6922	0.0117162	1	1700010K24Rik	3	108248909	108256985	-	226	antisense	RIKEN cDNA 1700010K24 gene [Source:MGI Symbol;Acc:MGI:1922690]	-	2	2	4	3	1	0	0	0	0	0	0.364942	0.373838	0.777268	0.614178	0.192771	0	0	0	0	0
ENSMUSG00000060284	0.967549	4.81854	2.99369	2.05457	6.83737	0	0	0	1.05055	0	3.68779	0.00534389	1	Sp7	15	102356606	102367182	-	3398	protein_coding	Sp7 transcription factor 7 [Source:MGI Symbol;Acc:MGI:2153568]	zf-C2H2	1	5	3	2	7	0	0	0	1	0	0.0121361	0.0621597	0.0387719	0.0272325	0.0897481	0	0	0	0.014024	0
ENSMUSG00000065304	2.90265	0	2.99369	1.02728	3.90707	0	0	0	0	0	3.55746	0.0438121	1	Gm23245	5	129789539	129789673	+	135	snoRNA	predicted gene, 23245 [Source:MGI Symbol;Acc:MGI:5453022]	-	3	0	3	1	4	0	0	0	0	0	0.91641	0	0.975903	0.342726	1.29085	0	0	0	0	0
ENSMUSG00000039760	223.504	248.636	106.775	5.13642	14.6515	5.18256	33.0326	4.16074	2.1011	7.12735	3.52883	0.000839207	0.0645838	Il22ra2	10	19621998	19634681	+	2498	protein_coding	interleukin 22 receptor, alpha 2 [Source:MGI Symbol;Acc:MGI:2665114]	-	231	258	107	5	15	5	38	4	2	7	3.81349	4.36304	1.88109	0.0926102	0.261607	0.0937592	0.559707	0.0754017	0.0381534	0.12864
ENSMUSG00000066072	0	3.85483	6.98528	3.08185	0.976766	1.03651	0	0	0	0	3.43842	0.0275458	1	Cyp4a10	4	115518264	115533649	+	2109	protein_coding	cytochrome P450, family 4, subfamily a, polypeptide 10 [Source:MGI Symbol;Acc:MGI:88611]	-	0	4	7	3	1	1	0	0	0	0	0	0.0801209	0.145761	0.0658152	0.0206573	0.0222106	0	0	0	0
ENSMUSG00000104701	1.9351	2.89112	3.99159	1.02728	4.88383	0	0	1.04018	0	0	3.42519	0.00995094	1	Gm42555	5	43807705	43808743	-	1039	lincRNA	predicted gene 42555 [Source:MGI Symbol;Acc:MGI:5662692]	-	2	3	4	1	5	0	0	1	0	0	0.0793811	0.121974	0.169069	0.0445313	0.209655	0	0	0.0453208	0	0
ENSMUSG00000038630	5.8053	0	1.99579	2.05457	3.90707	0	0	0	1.05055	0	3.32648	0.0291465	1	Zkscan16	4	58943628	58958355	+	2794	protein_coding	zinc finger with KRAB and SCAN domains 16 [Source:MGI Symbol;Acc:MGI:3510405]	zf-C2H2	6	0	2	2	4	0	0	0	1	0	0.0885579	0	0.0314357	0.0331196	0.0623712	0	0	0	0.0170557	0
ENSMUSG00000068303	3.8702	2.89112	4.98949	1.02728	0.976766	0	0.869278	0	0	0	3.32614	0.0163374	1	Spr-ps1	6	85152621	85156223	+	3437	transcribed_unprocessed_pseudogene	sepiapterin reductase pseudogene 1 [Source:MGI Symbol;Acc:MGI:1345187]	-	4	3	5	1	1	0	1	0	0	0	0.0479936	0.0368726	0.0638866	0.0134618	0.0126757	0	0.0107051	0	0	0
ENSMUSG00000047678	4.83775	3.85483	2.99369	2.05457	0	0	0.869278	0	0	0	3.32465	0.0264381	1	Gpr82	X	13661363	13667433	+	2497	protein_coding	G protein-coupled receptor 82 [Source:MGI Symbol;Acc:MGI:2441734]	-	5	4	3	2	0	0	1	0	0	0	0.082576	0.0676712	0.0527621	0.0370589	0	0	0.014735	0	0	0
ENSMUSG00000109852	3.8702	1.92741	0.997897	1.02728	0.976766	0	0	0	0	0	3.26027	0.0454272	1	Gm45360	8	57626083	57627487	-	1405	TEC	predicted gene 45360 [Source:MGI Symbol;Acc:MGI:5791196]	-	4	2	1	1	1	0	0	0	0	0	0.117405	0.0601334	0.0312567	0.032931	0.031008	0	0	0	0	0
ENSMUSG00000115405	2.90265	0	3.99159	5.13642	0.976766	0	0	0	0	1.01819	3.24044	0.0384074	1	Gm41307	15	38385634	38404154	-	686	lincRNA	predicted gene, 41307 [Source:MGI Symbol;Acc:MGI:5624192]	-	3	0	4	5	1	0	0	0	0	1	0.180343	0	0.256068	0.337231	0.0635077	0	0	0	0	0.0669183
ENSMUSG00000108682	1.9351	3.85483	0.997897	6.1637	0	0	0	0	0	1.01819	3.23539	0.0421427	1	Gm29754	7	27067456	27067813	+	358	processed_pseudogene	predicted gene, 29754 [Source:MGI Symbol;Acc:MGI:5588913]	-	2	4	1	6	0	0	0	0	0	1	0.230383	0.471997	0.122669	0.775442	0	0	0	0	0	0.128229
ENSMUSG00000107647	3.8702	1.92741	1.99579	4.10914	0	0	0	0	1.05055	0	3.11438	0.0424735	1	Gm44445	6	52560552	52563234	+	2683	TEC	predicted gene, 44445 [Source:MGI Symbol;Acc:MGI:5690837]	-	4	2	2	4	0	0	0	0	1	0	0.0614811	0.0314899	0.0327362	0.0689796	0	0	0	0	0.0177613	0
ENSMUSG00000103755	2.90265	5.78224	5.98738	0	2.9303	0	0.869278	1.04018	0	0	3.1061	0.0228119	1	Gm37805	9	95407461	95408554	+	1094	TEC	predicted gene, 37805 [Source:MGI Symbol;Acc:MGI:5611033]	-	3	6	6	0	3	0	1	1	0	0	0.113085	0.231684	0.240854	0	0.119469	0	0.0336319	0.0430424	0	0
ENSMUSG00000026822	13.5457	651.466	715.492	54.446	94.7463	41.4605	19.9934	21.8439	50.4264	51.9278	3.04314	0.000972249	0.0699667	Lcn2	2	32384633	32388252	-	2623	protein_coding	lipocalin 2 [Source:MGI Symbol;Acc:MGI:96757]	-	14	676	717	53	97	40	23	21	48	51	0.220106	10.8871	12.0044	0.934886	1.61111	0.714329	0.322626	0.376994	0.872044	0.892567
ENSMUSG00000096499	14.5132	7.70966	17.9622	0	0	0	1.73856	3.12055	0	0	3.03695	0.0441028	1	Ighv1-5	12	114513330	114513807	-	395	IG_V_gene	immunoglobulin heavy variable V1-5 [Source:MGI Symbol;Acc:MGI:3704121]	-	15	8	18	0	0	0	2	3	0	0	1.56602	0.855569	2.00122	0	0	0	0.186295	0.357633	0	0
ENSMUSG00000104316	2.90265	5.78224	2.99369	5.13642	0	0	1.73856	0	0	0	3.03678	0.040341	1	Gm37909	1	36473952	36476110	+	2159	TEC	predicted gene, 37909 [Source:MGI Symbol;Acc:MGI:5611137]	-	3	6	3	5	0	0	2	0	0	0	0.0573022	0.117398	0.0610222	0.107152	0	0	0.0340837	0	0	0
ENSMUSG00000096979	1.9351	2.89112	2.99369	2.05457	0.976766	0	0	1.04018	0	0	2.98257	0.0308378	1	Gm26880	4	146509094	146511764	-	1318	lincRNA	predicted gene, 26880 [Source:MGI Symbol;Acc:MGI:5477374]	-	2	3	3	2	1	0	0	1	0	0	0.0625773	0.0961541	0.0999598	0.0702095	0.0330549	0	0	0.0357271	0	0
ENSMUSG00000115231	2.90265	2.89112	1.99579	2.05457	0.976766	0	0	1.04018	0	0	2.97974	0.0309297	1	4930402D18Rik	15	60912974	60955320	+	1549	antisense	RIKEN cDNA 4930402D18 gene [Source:MGI Symbol;Acc:MGI:1922102]	-	3	3	2	2	1	0	0	1	0	0	0.0798679	0.0818148	0.0567019	0.0597393	0.0281254	0	0	0.0303992	0	0
ENSMUSG00000112317	0.967549	4.81854	0.997897	2.05457	1.95353	0	0.869278	0	0	0	2.97676	0.039761	1	Gm47580	10	52379196	52381226	-	2031	TEC	predicted gene, 47580 [Source:MGI Symbol;Acc:MGI:6096616]	-	1	5	1	2	2	0	1	0	0	0	0.0203045	0.103997	0.0216227	0.0455618	0.0429013	0	0.0181159	0	0	0
ENSMUSG00000112298	2.90265	1.92741	0.997897	1.02728	3.90707	0	0	1.04018	0	0	2.97404	0.0365944	1	Gm48088	12	11099596	11100077	+	482	processed_pseudogene	predicted gene, 48088 [Source:MGI Symbol;Acc:MGI:6097429]	-	3	2	1	1	4	0	0	1	0	0	0.256671	0.175285	0.0911113	0.0959918	0.361546	0	0	0.0976937	0	0
[truncated: 1,627 more rows]

## Sheet: eWAT
gene_id	eW6	eW7	eW8	eW9	eW10	eW1	eW2	eW3	eW4	eW5	log2FoldChange	pvalue	padj	gene_name	gene_chr	gene_start	gene_end	gene_strand	gene_length	gene_biotype	gene_description	tf_family	eW6_readcount	eW7_readcount	eW8_readcount	eW9_readcount	eW10_readcount	eW1_readcount	eW2_readcount	eW3_readcount	eW4_readcount	eW5_readcount	eW6_fpkm	eW7_fpkm	eW8_fpkm	eW9_fpkm	eW10_fpkm	eW1_fpkm	eW2_fpkm	eW3_fpkm	eW4_fpkm	eW5_fpkm
[truncated: 2,698 more rows]

[truncated: 3 more sheets: BAT, Liver, Skeletal Muscle]
