# Supplementary material for: Sulforaphane reduces obesity by reversing leptin resistance
Source: eLife. 2022 Mar 24;11:e67368. doi: 10.7554/eLife.67368 (PMC8947770; doi:10.7554/eLife.67368)
Supplement: Supplementary file 2. — Results failed to show the SFN-induced upregulation of Hmox1 in the skeletal muscle of NRF2 KO mice. [file elife-67368-supp2.xlsx]

## Sheet: Hypothalamus
gene_id	H1KOSFN	H2KOSFN	H3KOSFN	H4KOSFN	H5KOSFN	H6_KO_C	H7_KO_C	H8_KO_C	H9_KO_C	H10_KO_C	H_KO_SFN	H_KO_C	log2FoldChange	pvalue	padj	gene_name	gene_chr	gene_start	gene_end	gene_strand	gene_length	gene_biotype	gene_description	tf_family	H1KOSFN_count	H2KOSFN_count	H3KOSFN_count	H4KOSFN_count	H5KOSFN_count	H6_KO_C_count	H7_KO_C_count	H8_KO_C_count	H9_KO_C_count	H10_KO_C_count	H1KOSFN_fpkm	H2KOSFN_fpkm	H3KOSFN_fpkm	H4KOSFN_fpkm	H5KOSFN_fpkm	H6_KO_C_fpkm	H7_KO_C_fpkm	H8_KO_C_fpkm	H9_KO_C_fpkm	H10_KO_C_fpkm
ENSMUSG00000110924	37.1099	30.1442	15.111	32.2827	24.5596	34.6031	58.9611	60.6136	58.6673	61.2087	27.8415	54.8108	-0.978063	0.000345982	0.999545	Gm40518	9	48132504	48158965	-	4321	lincRNA	predicted gene, 40518 [Source:MGI Symbol;Acc:MGI:5623403]	-	37	30	15	32	28	35	60	53	62	63	0.327879	0.268039	0.131158	0.281528	0.2148	0.304804	0.527447	0.529482	0.51354	0.536072
ENSMUSG00000023951	1617.79	1739.32	1750.87	1813.88	2211.24	1450.36	1257.84	1351.8	1588.75	1316.47	1826.62	1393.04	0.3911	0.000419191	0.999545	Vegfa	17	46016993	46032369	-	4285	protein_coding	vascular endothelial growth factor A [Source:MGI Symbol;Acc:MGI:103178]	-	1613	1731	1738	1798	2521	1467	1280	1182	1679	1355	14.4139	15.5958	15.3245	15.9512	19.5021	12.883	11.3467	11.9077	14.0238	11.6267
ENSMUSG00000078765	11.0327	16.0769	9.06663	9.0795	13.1569	3.95464	3.93074	3.43096	2.83874	2.9147	11.6825	3.41396	1.77879	0.000628546	0.999545	U2af1l4	7	30563301	30565365	+	1656	protein_coding	U2 small nuclear RNA auxiliary factor 1-like 4 [Source:MGI Symbol;Acc:MGI:2678374]	-	11	16	9	9	15	4	4	3	3	3	0.254348	0.37301	0.205339	0.206604	0.300256	0.0908943	0.0917511	0.0782025	0.0648377	0.0666082
ENSMUSG00000019913	26.0772	57.274	33.2443	19.1678	205.248	33.6144	16.7056	16.0111	9.46246	6.80097	68.2023	16.5189	2.04918	0.000773932	0.999545	Sim1	10	50894754	50989152	+	8621	protein_coding	single-minded family bHLH transcription factor 1 [Source:MGI Symbol;Acc:MGI:98306]	bHLH	26	57	33	19	234	34	17	14	10	7	0.115481	0.255257	0.144626	0.0837822	0.899743	0.148408	0.0749036	0.0701019	0.0415154	0.0298543
ENSMUSG00000031642	508.506	509.437	502.694	449.94	446.458	606.048	648.572	612.998	543.145	820.003	483.407	646.153	-0.419078	0.000785435	0.999545	Sh3rf1	8	61223872	61396071	+	7426	protein_coding	SH3 domain containing ring finger 1 [Source:MGI Symbol;Acc:MGI:1913066]	-	507	507	499	446	509	613	660	536	574	844	2.61426	2.63581	2.53883	2.28316	2.27208	3.10629	3.37599	3.1158	2.76645	4.17882
ENSMUSG00000022803	12.0356	10.0481	19.1407	20.1767	26.3139	7.90927	2.94806	2.28731	7.56997	7.77254	17.543	5.69743	1.61175	0.000807557	0.999545	Popdc2	16	38362209	38378216	+	2360	protein_coding	popeye domain containing 2 [Source:MGI Symbol;Acc:MGI:1930150]	-	12	10	19	20	30	8	3	2	8	8	0.1947	0.163587	0.30418	0.322161	0.421376	0.12756	0.048286	0.0365828	0.121323	0.124636
ENSMUSG00000114598	4.01188	0	3.02221	1.00883	2.63139	5.93195	14.7403	6.86192	10.4087	10.6872	2.13486	9.72602	-2.18562	0.000997665	0.999545	D130062J10Rik	13	98798611	98801410	-	2800	sense_intronic	RIKEN cDNA D130062J10 gene [Source:MGI Symbol;Acc:MGI:2441949]	-	4	0	3	1	3	6	15	6	11	11	0.0547014	0	0.0404811	0.0135768	0.0355159	0.0806362	0.203491	0.0925023	0.140605	0.144445
ENSMUSG00000080893	332.986	334.601	287.11	309.712	235.948	423.146	326.251	410.572	460.822	424.575	300.071	409.073	-0.448342	0.00105847	0.999545	Gm15920	5	130188395	130188796	+	402	processed_pseudogene	predicted gene 15920 [Source:MGI Symbol;Acc:MGI:3801934]	-	332	333	285	307	269	428	332	359	487	437	31.6234	31.9801	26.786	29.0314	22.1813	40.064	31.3707	38.5503	43.358	39.9689
ENSMUSG00000116072	0	0	1.0074	0	0	7.90927	2.94806	6.86192	3.78498	0.971567	0.201481	4.49516	-4.05814	0.00111134	0.999545	Gm46526	15	84106658	84108851	+	282	lincRNA	predicted gene, 46526 [Source:MGI Symbol;Acc:MGI:5826163]	-	0	0	1	0	0	8	3	6	4	1	0	0	0.13398	0	0	1.06752	0.404095	0.918463	0.507665	0.130382
ENSMUSG00000030790	37.1099	47.2259	46.3405	75.6625	42.1022	35.5917	23.5844	24.0167	23.6562	28.1754	49.6882	27.0049	0.876803	0.00111221	0.999545	Adm	7	110627661	110629820	+	1619	protein_coding	adrenomedullin [Source:MGI Symbol;Acc:MGI:108058]	-	37	47	46	75	48	36	24	21	25	29	0.875087	1.12076	1.07349	1.76104	0.982776	0.836744	0.563088	0.559928	0.552662	0.658594
ENSMUSG00000113121	57.1693	31.149	35.2591	48.424	14.0341	63.2742	84.5109	98.3542	59.6135	70.9244	37.2071	75.3354	-1.02089	0.00114727	0.999545	Gm35161	13	68998793	69031550	+	1093	antisense	predicted gene, 35161 [Source:MGI Symbol;Acc:MGI:5594320]	-	57	31	35	48	16	64	86	86	63	73	1.99688	1.09497	1.20986	1.66946	0.485244	2.20342	2.98875	3.39655	2.06294	2.45567
ENSMUSG00000059645	30.0891	21.1009	45.3331	48.424	109.641	19.7732	14.7403	24.0167	22.7099	20.4029	50.9176	20.3286	1.33067	0.0012042	0.999545	Gm7361	5	26257691	26264308	+	2995	protein_coding	predicted gene 7361 [Source:MGI Symbol;Acc:MGI:3805965]	-	30	21	45	48	125	20	15	21	24	21	0.383549	0.270697	0.567681	0.609256	1.38348	0.251287	0.190242	0.302679	0.286801	0.257804
ENSMUSG00000107058	0	0	0	0	0	2.96598	5.89611	0	5.67748	4.85784	0	3.87948	-4.43815	0.00166531	0.999545	Gm42545	5	118026449	118027370	-	922	TEC	predicted gene 42545 [Source:MGI Symbol;Acc:MGI:5662682]	-	0	0	0	0	0	3	6	0	6	5	0	0	0	0	0	0.122441	0.247191	0	0.232909	0.199391
ENSMUSG00000087675	16.0475	24.1154	18.1333	14.1237	7.89416	40.535	58.9611	49.1771	18.9249	22.346	16.0628	37.9888	-1.24455	0.00168722	0.999545	Gm11762	11	119548630	119569046	+	1705	processed_transcript	predicted gene 11762 [Source:MGI Symbol;Acc:MGI:3651277]	-	16	24	18	14	9	41	60	43	20	23	0.359329	0.543436	0.398875	0.312147	0.174976	0.904891	1.33671	1.08869	0.419829	0.495987
ENSMUSG00000116898	5.01485	8.03845	6.04442	6.053	6.1399	15.8185	18.671	9.14923	12.3012	25.2607	6.25812	16.2401	-1.38239	0.00169389	0.999545	AC113006.1	16	17531182	17531518	+	337	bidirectional_promoter_lncRNA	novel transcript	-	5	8	6	6	7	16	19	8	13	26	0.568115	0.916476	0.672682	0.676826	0.688538	1.7866	2.14158	1.02475	1.38064	2.83668
ENSMUSG00000022369	61.1812	37.1779	56.4146	69.6095	78.9416	45.4783	31.4459	32.0223	33.1186	35.948	60.6649	35.6026	0.770483	0.00169768	0.999545	Mtbp	15	55557408	55626423	+	5481	protein_coding	Mdm2, transformed 3T3 cell double minute p53 binding protein [Source:MGI Symbol;Acc:MGI:2146005]	-	61	37	56	69	90	46	32	28	35	37	0.426154	0.260617	0.386026	0.478569	0.544306	0.315817	0.221769	0.220525	0.228547	0.248204
ENSMUSG00000048489	27.0802	31.149	61.4516	109.963	85.0815	27.6824	4.91343	34.3096	29.3336	7.77254	62.945	20.8023	1.60206	0.0017088	0.999545	Depp1	6	116650609	116652794	+	1358	protein_coding	DEPP1 autophagy regulator [Source:MGI Symbol;Acc:MGI:1918730]	-	27	31	61	109	97	28	5	30	31	8	0.761308	0.881299	1.69714	3.05128	2.36773	0.775881	0.139856	0.953632	0.817012	0.216599
ENSMUSG00000043424	24.0713	79.3797	28.2073	44.3887	83.3272	32.6257	18.671	24.0167	11.355	3.88627	51.8748	18.1109	1.52394	0.00180756	0.999545	Eif3j2	18	43475418	43477796	-	2379	protein_coding	eukaryotic translation initiation factor 3, subunit J2 [Source:MGI Symbol;Acc:MGI:3704486]	-	24	79	28	44	95	33	19	21	12	4	0.38629	1.28202	0.444685	0.703095	1.3237	0.521983	0.303369	0.381052	0.180532	0.0618204
ENSMUSG00000041734	210.624	207.995	223.643	202.775	288.575	171.038	166.074	171.548	180.733	159.337	226.723	169.746	0.419711	0.00183609	0.999545	Kirrel	3	87078593	87174747	-	7463	protein_coding	kirre like nephrin family adhesion molecule 1 [Source:MGI Symbol;Acc:MGI:1891396]	-	210	207	222	201	329	173	169	150	191	164	1.07746	1.07082	1.1239	1.02385	1.46131	0.872308	0.860171	0.867636	0.915981	0.807973
ENSMUSG00000111284	5.01485	2.00961	2.01481	8.07066	0.877128	0	0	0	0	0	3.59741	0	4.27774	0.00189356	0.999545	Gm47334	9	9564087	9583564	+	456	lincRNA	predicted gene, 47334 [Source:MGI Symbol;Acc:MGI:6096222]	-	5	2	2	8	1	0	0	0	0	0	0.419857	0.169327	0.165712	0.666931	0.0726934	0	0	0	0	0
ENSMUSG00000028420	216.642	224.072	244.799	245.146	231.562	209.596	191.624	173.835	169.378	158.365	232.444	180.56	0.364234	0.00216164	0.999545	Tmem38b	4	53826045	53862019	+	3807	protein_coding	transmembrane protein 38B [Source:MGI Symbol;Acc:MGI:1098718]	-	216	223	243	243	264	212	195	152	179	163	2.17254	2.26143	2.41164	2.42649	2.29869	2.09551	1.94564	1.72354	1.68282	1.57424
ENSMUSG00000029206	435.289	434.077	439.228	408.577	483.298	406.339	339.026	333.947	368.09	330.333	440.094	355.547	0.307892	0.00217454	0.999545	Nsun7	5	66259897	66298026	+	5388	protein_coding	NOL1/NOP2/Sun domain family, member 7 [Source:MGI Symbol;Acc:MGI:1918168]	-	434	432	436	405	551	411	345	292	389	340	3.08431	3.0954	3.05737	2.85748	3.38988	2.87046	2.43222	2.33946	2.58398	2.32016
ENSMUSG00000044534	18.0535	23.1106	27.1999	25.2208	5.26277	42.5123	56.9957	44.6025	37.8498	29.147	19.7695	42.2215	-1.10249	0.00219843	0.999545	Ackr2	9	121898355	121911074	+	3127	protein_coding	atypical chemokine receptor 2 [Source:MGI Symbol;Acc:MGI:1891697]	-	18	23	27	25	6	43	58	39	40	30	0.220415	0.283963	0.32623	0.303926	0.0636039	0.517461	0.70455	0.538389	0.457824	0.352744
ENSMUSG00000024517	74.2198	82.3942	73.5404	82.7243	78.9416	97.8772	80.5802	126.946	135.313	205.972	78.3641	129.338	-0.72327	0.00235488	0.999545	Grp	18	65872820	65886579	+	1059	protein_coding	gastrin releasing peptide [Source:MGI Symbol;Acc:MGI:95833]	-	74	82	73	82	90	99	82	111	143	212	2.67567	2.98937	2.60445	2.94356	2.81713	3.51784	2.94123	4.52467	4.83289	7.36048
ENSMUSG00000114707	9.02674	20.0961	19.1407	21.1855	21.0511	6.92061	3.93074	6.86192	13.2474	3.88627	18.1	6.9694	1.37397	0.00240511	0.999545	Gm47558	13	114281668	114284381	-	2714	TEC	predicted gene, 47558 [Source:MGI Symbol;Acc:MGI:6096579]	-	9	20	19	21	24	7	4	6	14	4	0.126978	0.284499	0.264504	0.294147	0.293131	0.0970566	0.0559837	0.0954335	0.184623	0.0541897
ENSMUSG00000113841	16.0475	12.0577	17.1258	14.1237	10.5255	31.6371	40.2901	18.2985	27.4411	21.3745	13.9761	27.8082	-1.00162	0.00245986	0.999545	Gm48701	13	62449317	62451609	-	2293	TEC	predicted gene, 48701 [Source:MGI Symbol;Acc:MGI:6098338]	-	16	12	17	14	12	32	41	16	29	22	0.267185	0.20204	0.280113	0.232102	0.173475	0.525149	0.67919	0.301214	0.452648	0.352765
ENSMUSG00000037681	203.603	194.933	226.666	207.82	441.196	193.777	126.766	164.686	156.131	130.19	254.843	154.31	0.725687	0.00265636	0.999545	Esyt3	9	99309963	99358557	-	7138	protein_coding	extended synaptotagmin-like protein 3 [Source:MGI Symbol;Acc:MGI:1098699]	-	203	194	225	206	503	196	129	144	165	134	1.08897	1.04927	1.19095	1.0971	2.33589	1.03328	0.686475	0.870854	0.827321	0.690232
ENSMUSG00000063594	64.1901	43.2067	76.5626	77.6801	61.399	30.6484	41.2728	34.3096	54.8823	33.0333	64.6077	38.8293	0.730826	0.00266213	0.999545	Gng8	7	16891786	16895436	+	1522	protein_coding	guanine nucleotide binding protein (G protein), gamma 8 [Source:MGI Symbol;Acc:MGI:109163]	-	64	43	76	77	70	31	42	30	58	34	1.61013	1.09072	1.88663	1.92323	1.52456	0.76645	1.04821	0.850876	1.36389	0.821355
ENSMUSG00000017453	75.2228	75.3605	92.6811	104.919	156.129	65.2515	69.7706	48.0334	72.861	42.749	100.862	59.7331	0.756415	0.00274369	0.999545	Pipox	11	77880615	77894096	-	2470	protein_coding	pipecolic acid oxidase [Source:MGI Symbol;Acc:MGI:1197006]	-	75	75	92	104	178	66	71	42	77	44	1.16268	1.17226	1.40728	1.60063	2.38882	1.0055	1.09188	0.734027	1.11573	0.654971
ENSMUSG00000113288	126.374	118.567	92.6811	121.06	126.307	87.002	88.4417	90.3486	83.2697	81.6116	116.998	86.1347	0.444019	0.00283861	0.999545	Gm47982	12	66456103	66458442	-	2340	TEC	predicted gene, 47982 [Source:MGI Symbol;Acc:MGI:6097270]	-	126	118	92	120	144	88	90	79	88	84	2.06182	1.94683	1.48546	1.94949	2.03989	1.41515	1.46096	1.45737	1.34596	1.31987
ENSMUSG00000097479	20.0594	18.0865	18.1333	10.0883	21.9282	6.92061	6.8788	8.00557	4.73123	11.6588	17.6591	7.639	1.21474	0.0029326	0.999545	Gm26582	5	92043064	92055960	+	3135	lincRNA	predicted gene, 26582 [Source:MGI Symbol;Acc:MGI:5477076]	-	20	18	18	10	25	7	7	7	5	12	0.244281	0.221664	0.216932	0.12126	0.26434	0.0840229	0.0848149	0.0963873	0.057082	0.140738
ENSMUSG00000030347	457.355	486.327	472.472	391.427	431.547	577.377	595.507	529.512	473.123	639.291	447.825	562.962	-0.330447	0.00340915	0.999545	D6Wsu163e	6	126939962	126975967	+	6784	protein_coding	DNA segment, Chr 6, Wayne State University 163, expressed [Source:MGI Symbol;Acc:MGI:107893]	-	456	484	469	388	492	584	606	463	500	658	2.5738	2.75436	2.61201	2.17421	2.40403	3.2394	3.39311	2.94615	2.63785	3.56621
ENSMUSG00000065561	8.02377	3.01442	7.05182	2.01767	7.01703	1.97732	0	0	0.946246	0	5.42494	0.584713	3.1853	0.00372163	0.999545	Mir369	12	109743418	109743496	+	79	miRNA	microRNA 369 [Source:MGI Symbol;Acc:MGI:3619374]	-	8	3	7	2	8	2	0	0	1	0	3.87757	1.46607	3.3478	0.962406	3.35678	0.952664	0	0	0.453043	0
ENSMUSG00000066170	12.0356	17.0817	17.1258	19.1678	23.6825	10.8752	10.8095	8.00557	2.83874	5.8294	17.8187	7.6717	1.22501	0.00373321	0.999545	E230001N04Rik	17	28522720	28525398	+	2679	lincRNA	RIKEN cDNA E230001N04 gene [Source:MGI Symbol;Acc:MGI:2443549]	-	12	17	17	19	27	11	11	7	3	6	0.171516	0.244984	0.239753	0.26961	0.33408	0.15451	0.155967	0.112794	0.0400788	0.0823465
ENSMUSG00000099868	4.01188	1.00481	7.05182	1.00883	2.63139	0	0	0	0	0	3.14175	0	4.08686	0.00374745	0.999545	Gm28792	1	152731206	152751824	-	419	sense_intronic	predicted gene 28792 [Source:MGI Symbol;Acc:MGI:5579498]	-	4	1	7	1	3	0	0	0	0	0	0.365546	0.0921398	0.631208	0.090728	0.237338	0	0	0	0	0
ENSMUSG00000082029	23.0683	32.1538	13.0962	14.1237	18.4197	6.92061	8.84417	10.2929	0.946246	11.6588	20.1723	7.73254	1.39197	0.00383129	0.999545	H3f3c	2	119665626	119666036	-	411	processed_pseudogene	H3 histone, family 3C [Source:MGI Symbol;Acc:MGI:3650546]	-	23	32	13	14	21	7	9	9	1	12	2.1428	3.00586	1.19506	1.29492	1.6937	0.640904	0.831787	0.945279	0.0870813	1.07351
ENSMUSG00000087474	5.01485	5.02403	12.0888	5.04417	0	0	0.982685	0	0.946246	0	5.43438	0.385786	3.71798	0.00390145	0.999545	Gm12100	11	30750832	30756147	+	1933	processed_transcript	predicted gene 12100 [Source:MGI Symbol;Acc:MGI:3651586]	-	5	5	12	5	0	0	1	0	1	0	0.0990455	0.0998618	0.234551	0.0983317	0	0	0.0196508	0	0.0185155	0
ENSMUSG00000069307	7.02079	11.0529	8.05922	4.03533	0.877128	0	0	2.28731	0.946246	0.971567	6.20907	0.841024	2.92567	0.00446979	0.999545	Hist1h2bq	13	21806612	21810197	-	2015	protein_coding	histone cluster 1, H2bq [Source:MGI Symbol;Acc:MGI:3702051]	-	7	11	8	4	1	0	0	2	1	1	0.133021	0.210755	0.150004	0.0754641	0.0164507	0	0	0.0428464	0.017762	0.018247
ENSMUSG00000021337	15.0446	7.03365	29.2147	23.2032	78.0644	13.8412	9.82685	9.14923	12.3012	5.8294	30.5121	10.1896	1.58663	0.00457313	0.999545	Scgn	13	23953456	23991214	-	1619	protein_coding	secretagogin, EF-hand calcium binding protein [Source:MGI Symbol;Acc:MGI:2384873]	-	15	7	29	23	89	14	10	8	13	6	0.354765	0.166922	0.676768	0.540053	1.82223	0.3254	0.23462	0.213306	0.287384	0.136261
ENSMUSG00000085816	25.0743	10.0481	7.05182	15.1325	19.2968	4.94329	2.94806	6.86192	6.62372	7.77254	15.3207	5.82991	1.39925	0.00457939	0.999545	Gm13052	4	142307765	142346475	-	769	lincRNA	predicted gene 13052 [Source:MGI Symbol;Acc:MGI:3651990]	-	25	10	7	15	22	5	3	6	7	8	1.24483	0.502036	0.343922	0.741516	0.948323	0.24467	0.148186	0.33681	0.32579	0.382499
ENSMUSG00000055799	83.2466	84.4038	66.4886	84.742	60.5219	52.3989	37.342	36.5969	66.2372	53.4362	75.8806	49.2023	0.618025	0.00460935	0.999545	Tcf7l1	6	72626378	72789254	-	3924	protein_coding	transcription factor 7 like 1 (T cell specific, HMG box) [Source:MGI Symbol;Acc:MGI:1202876]	HMG	83	84	66	84	69	53	38	32	70	55	0.809926	0.82644	0.635482	0.813778	0.582881	0.508258	0.367846	0.352031	0.638463	0.515348
ENSMUSG00000105545	4.01188	4.01923	6.04442	11.0972	2.63139	0	1.96537	0	0.946246	0.971567	5.56082	0.776637	2.79952	0.00475956	0.999545	4930599N24Rik	3	136758958	136759960	-	1003	TEC	RIKEN cDNA 4930599N24 gene [Source:MGI Symbol;Acc:MGI:1922633]	-	4	4	6	11	3	0	2	0	1	1	0.152706	0.153964	0.226016	0.416915	0.0991472	0	0.0757427	0	0.0356834	0.0366577
ENSMUSG00000087549	4.01188	5.02403	5.03701	8.07066	2.63139	0	0.982685	0	0	1.94313	4.955	0.585164	3.04493	0.00496754	0.999545	Gm13427	2	31676364	31688469	-	794	antisense	predicted gene 13427 [Source:MGI Symbol;Acc:MGI:3650808]	-	4	5	5	8	3	0	1	0	0	2	0.192902	0.243114	0.237924	0.383023	0.125245	0	0.04784	0	0	0.0926139
ENSMUSG00000097284	47.1396	29.1394	29.2147	20.1767	23.6825	73.1607	79.5975	45.7461	44.4736	33.0333	29.8706	55.2022	-0.888475	0.00513639	0.999545	4930480K23Rik	14	69732784	69767113	+	3755	lincRNA	RIKEN cDNA 4930480K23 gene [Source:MGI Symbol;Acc:MGI:1922266]	-	47	29	29	20	27	74	81	40	47	34	0.479275	0.29816	0.291794	0.202477	0.238349	0.741581	0.819382	0.459843	0.447976	0.332917
ENSMUSG00000110237	13.0386	18.0865	4.02961	17.1502	21.0511	0.988659	6.8788	4.57461	7.56997	4.85784	14.6712	4.97397	1.5594	0.00527398	0.999545	Gm18258	7	138899388	138900239	+	542	processed_pseudogene	predicted gene, 18258 [Source:MGI Symbol;Acc:MGI:5010443]	-	13	18	4	17	24	1	7	4	8	5	0.918418	1.28214	0.278836	1.19235	1.46782	0.0694285	0.490581	0.318581	0.528272	0.339185
ENSMUSG00000088608	1.00297	0	0	0	0	2.96598	2.94806	1.14365	5.67748	2.9147	0.200594	3.12997	-3.55319	0.00539707	0.999545	Gm24186	10	94821529	94821655	-	127	rRNA	predicted gene, 24186 [Source:MGI Symbol;Acc:MGI:5453963]	-	1	0	0	0	0	3	3	1	6	3	0.301504	0	0	0	0	0.888903	0.897282	0.339904	1.69089	0.868528
ENSMUSG00000035828	1218.61	1036.96	1208.88	1399.25	1408.67	980.749	815.629	1157.38	1067.37	813.202	1254.47	966.865	0.376256	0.00552495	0.999545	Pim3	15	88862186	88865726	+	2427	protein_coding	proviral integration site 3 [Source:MGI Symbol;Acc:MGI:1355297]	-	1215	1032	1200	1387	1606	992	830	1012	1128	837	19.1692	16.4161	18.681	21.7251	21.9349	15.3808	12.9903	17.9999	16.6344	12.6801
ENSMUSG00000108836	9.02674	7.03365	9.06663	7.06183	5.26277	1.97732	1.96537	2.28731	1.89249	2.9147	7.49032	2.20744	1.75928	0.00559705	0.999545	Gm44813	7	70571322	70574414	+	361	lincRNA	predicted gene 44813 [Source:MGI Symbol;Acc:MGI:5753389]	-	9	7	9	7	6	2	2	2	2	3	0.954623	0.748604	0.941942	0.737134	0.55094	0.208478	0.210443	0.239157	0.198285	0.305549
ENSMUSG00000092300	51.1515	41.1971	44.3257	65.5741	57.8905	33.6144	22.6018	34.3096	42.5811	31.0901	52.0278	32.8394	0.664666	0.00570939	0.999545	Cdk3-ps	11	116216003	116220287	+	1548	polymorphic_pseudogene	cyclin-dependent kinase 3, pseudogene [Source:MGI Symbol;Acc:MGI:1916931]	-	51	41	44	65	66	34	23	30	45	32	1.26152	1.02253	1.07392	1.59624	1.4133	0.826504	0.564376	0.836584	1.04042	0.760056
ENSMUSG00000073125	50.1485	128.615	181.333	129.131	151.743	74.1494	89.4244	66.3319	79.4847	30.1186	128.194	67.9018	0.917081	0.00577286	0.999545	Xlr3b	X	73192207	73202930	+	3780	protein_coding	X-linked lymphocyte-regulated 3B [Source:MGI Symbol;Acc:MGI:109505]	-	50	128	180	128	173	75	91	58	84	31	0.506494	1.30731	1.79916	1.28728	1.5171	0.746632	0.914453	0.662362	0.795342	0.301534
ENSMUSG00000054901	76.2258	57.274	45.3331	75.6625	164.9	38.5577	60.9265	42.3152	47.3123	22.346	83.8791	42.2915	0.990856	0.00578146	0.999545	Arhgef33	17	80307407	80400081	+	4680	protein_coding	Rho guanine nucleotide exchange factor (GEF) 33 [Source:MGI Symbol;Acc:MGI:2685787]	-	76	57	45	75	188	39	62	37	50	23	0.621819	0.470208	0.363292	0.609216	1.33159	0.313585	0.503219	0.341284	0.382376	0.180696
ENSMUSG00000025163	6.01782	7.03365	3.02221	8.07066	2.63139	6.92061	16.7056	17.1548	9.46246	19.4313	5.35515	13.935	-1.38663	0.00599599	0.999545	Cd7	11	121036747	121039418	-	1133	protein_coding	CD7 antigen [Source:MGI Symbol;Acc:MGI:88344]	-	6	7	3	8	3	7	17	15	10	20	0.202777	0.238522	0.100041	0.26842	0.0877711	0.23249	0.569942	0.571506	0.315891	0.649033
ENSMUSG00000086995	4.01188	16.0769	16.1184	23.2032	11.4027	3.95464	1.96537	6.86192	8.51622	0.971567	14.1626	4.45394	1.67432	0.00621973	0.999545	Gm13544	2	58276779	58286902	+	2940	antisense	predicted gene 13544 [Source:MGI Symbol;Acc:MGI:3649668]	-	4	16	16	23	13	4	2	6	9	1	0.0520966	0.210104	0.205618	0.297397	0.146574	0.0511976	0.0258401	0.0880975	0.109562	0.012506
ENSMUSG00000040490	376.114	402.928	370.724	287.517	382.428	386.566	436.312	494.058	471.231	615.002	363.942	480.634	-0.400986	0.0064991	0.999545	Lrfn2	17	48932379	49097588	+	3202	protein_coding	leucine rich repeat and fibronectin type III domain containing 2 [Source:MGI Symbol;Acc:MGI:1917780]	-	375	401	368	285	436	391	444	432	498	633	4.48442	4.83486	4.34225	3.3836	4.51362	4.59507	5.26712	5.82401	5.5664	7.26857
ENSMUSG00000057666	1505.46	1967.41	354.606	479.196	442.95	321.314	256.481	345.383	456.091	406.115	949.924	357.077	1.41147	0.00660397	0.999545	Gapdh	6	125161715	125166467	-	4133	protein_coding	glyceraldehyde-3-phosphate dehydrogenase [Source:MGI Symbol;Acc:MGI:95640]	-	1501	1958	352	475	505	325	261	302	482	418	13.9063	18.2898	3.21785	4.36902	4.05029	2.95907	2.39876	3.15429	4.17396	3.71858
ENSMUSG00000046169	217.645	240.149	158.162	240.102	327.169	211.573	132.663	123.515	168.432	164.195	236.645	160.075	0.563926	0.00688262	0.999545	Adamts6	13	104287835	104496695	+	7798	protein_coding	a disintegrin-like and metallopeptidase (reprolysin type) with thrombospondin type 1 motif, 6 [Source:MGI Symbol;Acc:MGI:1347348]	-	217	239	157	238	373	214	135	108	178	169	1.06555	1.18325	0.760685	1.16024	1.58557	1.03268	0.657601	0.597861	0.816965	0.796838
ENSMUSG00000097563	10.0297	9.04326	8.05922	10.0883	8.77128	3.95464	5.89611	2.28731	2.83874	0.971567	9.19836	3.18967	1.522	0.00709395	0.999545	Gm26638	6	40118779	40129477	+	1924	sense_intronic	predicted gene, 26638 [Source:MGI Symbol;Acc:MGI:5477132]	-	10	9	8	10	10	4	6	2	3	1	0.199018	0.180592	0.157099	0.197583	0.172288	0.0782333	0.118456	0.0448729	0.0558062	0.01911
ENSMUSG00000106209	26.0772	18.0865	10.074	12.106	11.4027	21.7505	32.4286	26.304	26.4949	38.8627	15.5493	29.1681	-0.912848	0.0071372	0.999545	Gm42918	5	121385522	121387101	+	1580	antisense	predicted gene 42918 [Source:MGI Symbol;Acc:MGI:5663055]	-	26	18	10	12	13	22	33	23	28	40	0.630105	0.439822	0.239129	0.288722	0.272738	0.523965	0.793357	0.628391	0.63426	0.930828
ENSMUSG00000113102	11.0327	18.0865	22.1629	24.212	33.3309	10.8752	11.7922	10.2929	13.2474	6.80097	21.765	10.6018	1.0422	0.0071682	0.999545	A930040O22Rik	12	98831813	98832785	+	973	TEC	RIKEN cDNA A930040O22 gene [Source:MGI Symbol;Acc:MGI:1925223]	-	11	18	22	24	38	11	12	9	14	7	0.432889	0.714202	0.854277	0.937679	1.29459	0.425419	0.468468	0.399291	0.51497	0.264516
ENSMUSG00000026313	1053.12	1028.92	843.196	917.029	774.504	1063.8	1138.93	1275.17	1078.72	1114.39	923.354	1134.2	-0.296774	0.00733705	0.999545	Hdac4	1	91928779	92195699	-	15813	protein_coding	histone deacetylase 4 [Source:MGI Symbol;Acc:MGI:3036234]	-	1050	1024	837	909	883	1076	1159	1115	1140	1147	2.54256	2.50004	1.99986	2.18527	1.851	2.56056	2.78407	3.04383	2.58022	2.66695
ENSMUSG00000025731	488.447	418	474.487	464.063	638.55	383.6	326.251	438.019	405.94	373.082	496.709	385.378	0.367735	0.00757283	0.999545	Mettl26	17	25875464	25886007	+	1109	protein_coding	methyltransferase like 26 [Source:MGI Symbol;Acc:MGI:1915597]	-	487	416	471	460	728	388	332	383	429	384	16.8149	14.4818	16.0464	15.7682	21.76	13.1655	11.3715	14.9083	13.845	12.7311
ENSMUSG00000025815	289.859	264.264	349.569	320.809	407.865	237.278	228.966	269.902	284.82	234.148	326.473	251.023	0.380659	0.00760754	0.999545	Dhtkd1	2	5896115	5942792	-	6333	protein_coding	dehydrogenase E1 and transketolase domain containing 1 [Source:MGI Symbol;Acc:MGI:2445096]	-	289	263	347	318	465	240	233	236	301	241	1.74737	1.60327	2.07018	1.90886	2.4339	1.42606	1.39752	1.60865	1.70108	1.39918
ENSMUSG00000070814	429.271	389.865	431.168	436.825	424.53	356.906	375.386	361.394	372.821	328.39	422.332	358.979	0.234561	0.00783152	0.999545	Zswim9	7	13258967	13278721	-	11875	protein_coding	zinc finger SWIM-type containing 9 [Source:MGI Symbol;Acc:MGI:2447816]	-	428	388	428	433	484	361	382	316	394	338	1.38009	1.26142	1.36175	1.38615	1.35105	1.14396	1.22192	1.14872	1.18749	1.04653
ENSMUSG00000034120	2263.7	2132.2	2287.81	2467.61	2425.26	2019.83	1935.89	2029.98	2088.37	2116.07	2315.32	2038.03	0.184113	0.00783755	0.999545	Srsf2	11	116849901	116853094	-	2958	protein_coding	serine/arginine-rich splicing factor 2 [Source:MGI Symbol;Acc:MGI:98284]	-	2257	2122	2271	2446	2765	2043	1970	1775	2207	2178	29.2166	27.6954	29.0073	31.435	30.9854	25.9901	25.2976	25.9036	26.7037	27.0724
ENSMUSG00000090035	79.2347	71.3413	58.4294	54.477	46.4878	105.786	71.736	101.785	76.6459	94.242	61.994	90.0391	-0.539462	0.00800861	0.999545	Galnt4	10	99108159	99113247	+	5089	protein_coding	polypeptide N-acetylgalactosaminyltransferase 4 [Source:MGI Symbol;Acc:MGI:894692]	-	79	71	58	54	53	107	73	89	81	97	0.594417	0.538626	0.43061	0.403382	0.345226	0.791204	0.544881	0.754948	0.569665	0.700819
ENSMUSG00000085711	26.0772	11.0529	23.1703	7.06183	23.6825	41.5237	22.6018	36.5969	28.3874	54.4078	18.2089	36.7035	-1.00758	0.00802832	0.999545	Gm15163	X	157016229	157017530	-	1302	processed_pseudogene	predicted gene 15163 [Source:MGI Symbol;Acc:MGI:3642430]	-	26	11	23	7	27	42	23	32	30	56	0.764643	0.326169	0.66743	0.204382	0.687405	1.21388	0.671009	1.06096	0.824664	1.58141
ENSMUSG00000030672	48.1426	21.1009	29.2147	26.2297	35.0851	12.8526	16.7056	19.4421	22.7099	18.4598	31.9546	18.034	0.826581	0.00832806	0.999545	Mylpf	7	127208890	127214298	+	1062	protein_coding	myosin light chain, phosphorylatable, fast skeletal muscle [Source:MGI Symbol;Acc:MGI:97273]	-	48	21	29	26	40	13	17	17	24	19	1.73067	0.763407	1.03172	0.930689	1.24852	0.460634	0.608045	0.691009	0.808823	0.657803
ENSMUSG00000069910	26.0772	7.03365	12.0888	13.1148	28.0681	3.95464	3.93074	9.14923	6.62372	10.6872	17.2765	6.86911	1.34101	0.00840252	0.999545	Spdl1	11	34809190	34833641	-	3460	protein_coding	spindle apparatus coiled-coil protein 1 [Source:MGI Symbol;Acc:MGI:1917635]	-	26	7	12	13	32	4	4	8	7	11	0.287736	0.0781058	0.131037	0.142831	0.306573	0.0435032	0.0439132	0.0998098	0.0724083	0.116892
ENSMUSG00000019842	246.731	241.154	235.732	223.961	263.139	210.584	220.121	173.835	199.658	165.166	242.143	193.873	0.320338	0.00843221	0.999545	Traf3ip2	10	39612934	39655307	+	3687	protein_coding	TRAF3 interacting protein 2 [Source:MGI Symbol;Acc:MGI:2143599]	-	246	240	234	222	300	213	224	152	211	170	2.55481	2.51304	2.3979	2.28895	2.69717	2.17392	2.30774	1.77963	2.04822	1.69528
ENSMUSG00000020857	41.1218	42.2019	26.1925	44.3887	33.3309	17.7959	27.5152	32.0223	17.9787	16.5166	37.4471	22.3657	0.751436	0.00867284	0.999545	Nme2	11	93949814	93956259	-	1171	protein_coding	NME/NM23 nucleoside diphosphate kinase 2 [Source:MGI Symbol;Acc:MGI:97356]	-	41	42	26	44	38	18	28	28	19	17	1.34067	1.38469	0.83889	1.4284	1.07569	0.578432	0.908265	1.03219	0.580715	0.533775
ENSMUSG00000052151	73.2169	81.3894	93.6885	100.883	166.654	58.3309	48.1516	73.1938	89.8934	35.948	103.166	61.1035	0.758742	0.00876576	0.999545	Plpp2	10	79526430	79533796	-	1654	protein_coding	phospholipid phosphatase 2 [Source:MGI Symbol;Acc:MGI:1354945]	-	73	81	93	100	190	59	49	64	95	37	1.68999	1.89065	2.1244	2.29837	3.80784	1.34231	1.12531	1.67034	2.05568	0.822494
ENSMUSG00000055760	61.1812	61.2932	54.3998	72.636	65.7846	76.1267	88.4417	92.6359	86.1084	81.6116	63.059	84.9849	-0.428292	0.008789	0.999545	Gemin6	17	80224441	80228497	+	1428	protein_coding	gem nuclear organelle associated protein 6 [Source:MGI Symbol;Acc:MGI:1914492]	-	61	61	54	72	75	77	90	81	91	84	1.63568	1.64916	1.42874	1.91673	1.74098	2.02908	2.39401	2.44859	2.28076	2.16281
ENSMUSG00000086843	15.0446	10.0481	17.1258	14.1237	4.38564	19.7732	20.6364	24.0167	18.9249	41.7774	12.1456	25.0257	-1.05293	0.00880344	0.999545	E030013I19Rik	2	12300946	12312315	+	3769	antisense	RIKEN cDNA E030013I19 gene [Source:MGI Symbol;Acc:MGI:2443735]	-	15	10	17	14	5	20	21	21	20	43	0.152392	0.102432	0.170416	0.141207	0.0439748	0.199683	0.211643	0.240521	0.18992	0.419478
ENSMUSG00000039518	15.0446	28.1346	15.111	22.1943	8.77128	23.7278	53.065	48.0334	23.6562	28.1754	17.8512	35.3316	-0.987291	0.00883116	0.999545	Cdsn	17	35552128	35557180	+	2678	protein_coding	corneodesmosin [Source:MGI Symbol;Acc:MGI:3505689]	-	15	28	15	22	10	24	54	42	25	29	0.214475	0.403653	0.211626	0.312297	0.12378	0.337239	0.76594	0.677015	0.334115	0.398157
ENSMUSG00000023403	1.00297	0	0	0	0	6.92061	1.96537	1.14365	1.89249	2.9147	0.200594	2.96737	-3.47127	0.00904987	0.999545	Stk31	6	49395604	49469501	+	3237	protein_coding	serine threonine kinase 31 [Source:MGI Symbol;Acc:MGI:1924735]	-	1	0	0	0	0	7	2	1	2	3	0.0118292	0	0	0	0	0.0813753	0.0234692	0.0133357	0.0221133	0.0340757
ENSMUSG00000032558	295.876	340.63	429.154	372.259	626.27	323.291	250.585	305.355	289.551	291.47	412.838	292.051	0.500586	0.00930621	0.999545	Nphp3	9	104002544	104043818	+	6617	protein_coding	nephronophthisis 3 (adolescent) [Source:MGI Symbol;Acc:MGI:1921275]	-	295	339	426	369	714	327	255	267	306	300	1.70709	1.97788	2.43241	2.11993	3.57682	1.85962	1.46383	1.74185	1.65511	1.66697
ENSMUSG00000110358	7.02079	6.02884	19.1407	21.1855	3.50851	5.93195	3.93074	0	0.946246	3.88627	11.3769	2.93904	1.93288	0.00941123	0.999545	A730009L09Rik	16	84515121	84523888	+	2512	protein_coding	RIKEN cDNA A730009L09 gene [Source:MGI Symbol;Acc:MGI:3028032]	-	7	6	19	21	4	6	4	0	1	4	0.106703	0.0922131	0.285774	0.317801	0.0527838	0.0898811	0.0604856	0	0.0142478	0.0585473
ENSMUSG00000116290	0	0	0	0	0.877128	0.988659	1.96537	8.00557	8.51622	0	0.175426	3.89516	-3.85276	0.00945956	0.999545	Gm49518	16	24039906	24060637	+	1771	lincRNA	predicted gene, 49518 [Source:MGI Symbol;Acc:MGI:6155211]	-	0	0	0	0	1	1	2	7	9	0	0	0	0	0	0.0187172	0.021248	0.0428966	0.170624	0.181882	0
ENSMUSG00000097325	15.0446	29.1394	14.1036	12.106	12.2798	32.6257	33.4113	29.735	26.4949	24.2892	16.5347	29.3112	-0.829447	0.00947242	0.999545	Gm16897	1	194955759	194976960	-	2492	antisense	predicted gene, 16897 [Source:MGI Symbol;Acc:MGI:4439821]	-	15	29	14	12	14	33	34	26	28	25	0.230483	0.449274	0.21226	0.183058	0.186226	0.498314	0.518254	0.450386	0.402139	0.368857
ENSMUSG00000038175	221.657	221.058	238.754	203.784	211.388	315.382	272.204	215.007	269.68	307.987	219.328	276.052	-0.333989	0.00952834	0.999545	Mylip	13	45389742	45412022	+	3233	protein_coding	myosin regulatory light chain interacting protein [Source:MGI Symbol;Acc:MGI:2388271]	-	221	220	237	202	241	319	277	188	285	317	2.61748	2.62711	2.76969	2.37521	2.47099	3.71297	3.25451	2.51022	3.15505	3.60512
ENSMUSG00000109868	62.1842	75.3605	57.422	81.7155	111.395	67.2288	48.1516	46.8898	51.0973	43.7205	77.6155	51.4176	0.596721	0.00972992	0.999545	Gm39244	8	108526937	108537221	-	2797	lincRNA	predicted gene, 39244 [Source:MGI Symbol;Acc:MGI:5622129]	-	62	75	57	81	127	68	49	41	54	45	0.848781	1.03521	0.769965	1.1009	1.50512	0.914857	0.66545	0.632777	0.690984	0.591543
ENSMUSG00000095912	4.01188	1.00481	0	5.04417	3.50851	26.6938	4.91343	8.00557	1.89249	16.5166	2.71387	11.6044	-2.09241	0.00979349	0.999545	Gm3317	14	5164535	5169233	+	519	protein_coding	predicted gene 3317 [Source:MGI Symbol;Acc:MGI:3781495]	-	4	1	0	5	4	27	5	7	2	17	0.295114	0.0743864	0	0.366234	0.255478	1.95764	0.365944	0.582224	0.137921	1.20434
ENSMUSG00000074529	10.0297	10.0481	10.074	12.106	7.89416	2.96598	4.91343	1.14365	7.56997	0.971567	10.0304	3.51292	1.48831	0.00983075	0.999545	Zfp972	2	177903340	177925613	-	864	protein_coding	zinc finger protein 972 [Source:MGI Symbol;Acc:MGI:1925953]	zf-C2H2	10	10	10	12	9	3	5	1	8	1	0.443183	0.446835	0.437295	0.527987	0.345294	0.130661	0.21982	0.0499627	0.331393	0.0425552
ENSMUSG00000097911	34.101	36.173	38.2813	20.1767	28.0681	20.7618	24.5671	12.5802	5.67748	18.4598	31.36	16.4093	0.932448	0.0101979	0.999545	Gm26691	3	133830668	134240641	-	8909	antisense	predicted gene, 26691 [Source:MGI Symbol;Acc:MGI:5477185]	-	34	36	38	20	32	21	25	11	6	19	0.146132	0.156004	0.161155	0.0853408	0.119064	0.0887008	0.106592	0.0532995	0.024104	0.0784136
ENSMUSG00000097131	153.455	154.74	139.022	126.104	184.197	107.764	111.043	140.669	115.442	102.986	151.503	115.581	0.395387	0.0102865	0.999545	D230017M19Rik	1	72236465	72274869	+	5335	lincRNA	RIKEN cDNA D230017M19 gene [Source:MGI Symbol;Acc:MGI:2445071]	-	153	154	138	125	210	109	113	123	122	106	1.09813	1.11442	0.977312	0.890699	1.3048	0.768828	0.804555	0.995245	0.81845	0.73053
ENSMUSG00000041360	537.592	518.48	567.168	489.284	480.666	546.728	652.503	635.871	601.813	612.087	518.638	609.8	-0.233813	0.0104049	0.999545	Pum3	19	27388702	27429820	-	3462	protein_coding	pumilio RNA-binding family member 3 [Source:MGI Symbol;Acc:MGI:106253]	-	536	516	563	485	548	553	664	556	636	630	5.92836	5.75418	6.14427	5.32562	5.24703	6.01084	7.28539	6.93278	6.57501	6.69083
ENSMUSG00000080902	81.2406	59.2836	71.5256	72.636	61.399	83.0473	110.061	88.0613	85.1622	100.071	69.217	93.2806	-0.43281	0.0107435	0.999545	Ywhaq-ps3	4	70248636	70249373	-	738	transcribed_processed_pseudogene	tyrosine 3-monooxygenase/tryptophan 5-monooxygenase activation protein theta, pseudogene 3 [Source:MGI Symbol;Acc:MGI:3650241]	-	81	59	71	72	70	84	112	77	90	103	4.20267	3.08643	3.63488	3.70879	3.14414	4.28312	5.76465	4.50395	4.36468	5.13154
ENSMUSG00000097805	6.01782	5.02403	8.05922	14.1237	2.63139	3.95464	0.982685	0	1.89249	1.94313	7.17123	1.75459	1.99973	0.0109822	0.999545	Gm17473	15	42676241	42704616	+	4069	antisense	predicted gene, 17473 [Source:MGI Symbol;Acc:MGI:4937107]	-	6	5	8	14	3	4	1	0	2	2	0.0564625	0.0474399	0.0742833	0.130796	0.0244396	0.0369921	0.00933521	0	0.0175917	0.0180721
ENSMUSG00000073471	139.413	138.663	173.273	212.864	182.443	139.401	314.459	190.99	330.24	324.503	169.331	259.919	-0.618926	0.0109914	0.999545	Rsph3a	17	7945614	7979824	+	3014	protein_coding	radial spoke 3A homolog (Chlamydomonas) [Source:MGI Symbol;Acc:MGI:1914082]	-	139	138	172	211	208	141	320	167	349	334	1.76591	1.76765	2.15612	2.66131	2.2876	1.76041	4.03291	2.39184	4.14428	4.07446
ENSMUSG00000028555	133.395	102.49	120.888	183.608	306.995	140.39	71.736	129.233	76.6459	50.5215	169.475	93.7052	0.85786	0.0109991	0.999545	Ttc39a	4	109406623	109444745	+	4904	protein_coding	tetratricopeptide repeat domain 39A [Source:MGI Symbol;Acc:MGI:2444350]	-	133	102	120	182	350	142	73	113	81	52	1.03848	0.802991	0.924527	1.41084	2.3658	1.08962	0.565437	0.994689	0.591155	0.38987
ENSMUSG00000020963	9.02674	9.04326	17.1258	18.159	35.9623	6.92061	9.82685	10.2929	6.62372	2.9147	17.8634	7.31575	1.30365	0.0110444	0.999545	Tshr	12	91384563	91549808	+	6012	protein_coding	thyroid stimulating hormone receptor [Source:MGI Symbol;Acc:MGI:98849]	-	9	9	17	18	41	7	10	9	7	3	0.0573218	0.0577943	0.106836	0.113818	0.226061	0.0438143	0.0631819	0.0646224	0.0416721	0.0183472
ENSMUSG00000083906	4.01188	7.03365	8.05922	11.0972	7.89416	2.96598	1.96537	0	2.83874	3.88627	7.61921	2.33127	1.67935	0.0110818	0.999545	Gm15186	X	159588465	159589027	+	563	processed_pseudogene	predicted gene 15186 [Source:MGI Symbol;Acc:MGI:3705337]	-	4	7	8	11	9	3	2	0	3	4	0.27205	0.480011	0.536871	0.742745	0.5299	0.200516	0.134938	0	0.190713	0.261227
ENSMUSG00000021127	170.505	139.668	194.429	130.139	161.392	224.426	178.849	179.554	214.798	251.636	159.227	209.852	-0.399377	0.0111197	0.999545	Zfp36l1	12	80107754	80113013	-	2990	protein_coding	zinc finger protein 36, C3H type-like 1 [Source:MGI Symbol;Acc:MGI:107946]	-	170	139	193	129	184	227	182	157	227	259	2.17708	1.79475	2.43879	1.64011	2.03989	2.85688	2.31213	2.26667	2.7172	3.18489
ENSMUSG00000025425	627.86	548.625	521.835	677.936	376.288	611.98	723.256	741.087	714.416	858.865	550.509	729.921	-0.407662	0.0111915	0.999545	St8sia5	18	77185853	77255450	+	2097	protein_coding	ST8 alpha-N-acetyl-neuraminide alpha-2,8-sialyltransferase 5 [Source:MGI Symbol;Acc:MGI:109243]	-	626	546	518	672	429	619	736	648	755	884	11.4307	10.0521	9.33297	12.1822	6.78139	11.1078	13.3319	13.3394	12.8859	15.4996
ENSMUSG00000004038	1.00297	4.01923	0	5.04417	4.38564	0	0	0	0	0	2.8904	0	3.97089	0.0112427	0.999545	Gstm3	3	107963696	107969283	-	1311	protein_coding	glutathione S-transferase, mu 3 [Source:MGI Symbol;Acc:MGI:106026]	-	1	4	0	5	5	0	0	0	0	0	0.0292075	0.117793	0	0.144985	0.126423	0	0	0	0	0
ENSMUSG00000098979	28.0832	39.1875	60.4442	42.371	79.8187	22.7392	28.4979	42.3152	27.4411	22.346	49.9809	28.6679	0.811724	0.0112469	0.999545	Gm27544	10	92071661	92071815	-	155	misc_RNA	predicted gene, 27544 [Source:MGI Symbol;Acc:MGI:5530926]	-	28	39	60	42	91	23	29	37	29	23	6.91708	9.71391	14.6254	10.3009	19.4612	5.58384	7.10686	10.3046	6.69627	5.45585
ENSMUSG00000116294	1.00297	0	0	0	0	2.96598	3.93074	2.28731	1.89249	1.94313	0.200594	2.60393	-3.27768	0.0112502	0.999545	Gm49415	15	68755500	68760811	+	1292	lincRNA	predicted gene, 49415 [Source:MGI Symbol;Acc:MGI:6155044]	-	1	0	0	0	0	3	4	2	2	2	0.029637	0	0	0	0	0.0873767	0.1176	0.0668232	0.0554031	0.056916
ENSMUSG00000112298	1.00297	0	0	0	0	5.93195	0.982685	12.5802	0	0.971567	0.200594	4.09328	-3.91627	0.0113074	0.999545	Gm48088	12	11099596	11100077	+	482	processed_pseudogene	predicted gene, 48088 [Source:MGI Symbol;Acc:MGI:6097429]	-	1	0	0	0	0	6	1	11	0	1	0.0794419	0	0	0	0	0.468426	0.078807	0.985156	0	0.0762815
ENSMUSG00000102291	0	0	0	0	0	2.96598	3.93074	3.43096	2.83874	0	0	2.63328	-3.86733	0.0113435	0.999545	Gm37542	1	182907710	182910541	+	2832	TEC	predicted gene, 37542 [Source:MGI Symbol;Acc:MGI:5610770]	-	0	0	0	0	0	3	4	3	3	0	0	0	0	0	0	0.0398625	0.0536511	0.0457286	0.0379136	0
ENSMUSG00000026012	1.00297	1.00481	3.02221	1.00883	0.877128	4.94329	4.91343	8.00557	5.67748	3.88627	1.38319	5.48521	-1.99041	0.0114026	0.999545	Cd28	1	60716800	60773359	+	6122	protein_coding	CD28 antigen [Source:MGI Symbol;Acc:MGI:88327]	-	1	1	3	1	1	5	5	7	6	4	0.00625465	0.0063062	0.0185147	0.00620958	0.0054146	0.0307336	0.0310233	0.0493588	0.0350772	0.0240233
ENSMUSG00000097099	28.0832	35.1682	28.2073	31.2738	18.4197	37.569	52.0823	33.1659	41.6348	57.3225	28.2304	44.3549	-0.660758	0.0114304	0.999545	Gm9917	9	107558809	107568415	-	6021	antisense	predicted gene 9917 [Source:MGI Symbol;Acc:MGI:3704343]	-	28	35	28	31	21	38	53	29	44	59	0.178068	0.224419	0.175703	0.195726	0.115614	0.237494	0.334363	0.207916	0.261548	0.360288
ENSMUSG00000084946	58.1723	40.1923	37.2739	38.3357	26.3139	76.1267	60.9265	65.1882	50.151	52.4646	40.0576	60.9714	-0.608876	0.0115699	0.999545	Dlx1as	2	71516454	71537891	-	1630	antisense	distal-less homeobox 1, antisense [Source:MGI Symbol;Acc:MGI:1195983]	-	58	40	37	38	30	77	62	57	53	54	1.3625	0.9474	0.857635	0.88624	0.61009	1.77762	1.44483	1.50955	1.16374	1.21807
ENSMUSG00000015711	421.248	408.956	447.287	405.551	462.247	529.921	502.152	513.5	452.306	512.016	429.058	501.979	-0.225306	0.0117102	0.999545	Prune1	3	95253674	95282076	-	3618	protein_coding	prune exopolyphosphatase [Source:MGI Symbol;Acc:MGI:1925152]	-	420	407	444	402	527	536	511	449	478	527	4.44506	4.34297	4.63664	4.22389	4.82839	5.57485	5.36493	5.35719	4.72853	5.35561
ENSMUSG00000051262	17.0505	22.1058	27.1999	18.159	16.6654	29.6598	40.2901	36.5969	27.4411	29.147	20.2361	32.627	-0.689861	0.0117788	0.999545	Nat8f3	6	85732513	85765754	-	3134	protein_coding	N-acetyltransferase 8 (GCN5-related) family member 3 [Source:MGI Symbol;Acc:MGI:2136449]	-	17	22	27	18	19	30	41	32	29	30	0.207705	0.27101	0.325502	0.218338	0.200962	0.360213	0.496931	0.440768	0.331181	0.351956
ENSMUSG00000069554	2.00594	0	2.01481	0	0	3.95464	5.89611	1.14365	5.67748	7.77254	0.804149	4.88888	-2.6402	0.0117842	0.999545	I830134H01Rik	19	38051774	38054528	-	2755	lincRNA	RIKEN cDNA I830134H01 gene [Source:MGI Symbol;Acc:MGI:3588250]	-	2	0	2	0	0	4	6	1	6	8	0.0277974	0	0.0274282	0	0	0.0546356	0.0827259	0.0156689	0.0779464	0.106766
ENSMUSG00000056055	32.0951	29.1394	24.1777	30.265	12.2798	26.6938	43.2381	54.8954	44.4736	45.6637	25.5914	42.9929	-0.752544	0.0119887	0.999545	Sag	1	87803680	87845158	+	8904	protein_coding	S-antigen, retina and pineal gland (arrestin) [Source:MGI Symbol;Acc:MGI:98227]	-	32	29	24	30	14	27	44	48	47	47	0.137614	0.12574	0.101839	0.128083	0.0521198	0.114108	0.187706	0.23271	0.188921	0.194079
ENSMUSG00000100594	46.1366	30.1442	37.2739	49.4328	42.9793	24.7165	17.6883	24.0167	24.6024	37.8911	41.1934	25.783	0.674758	0.0120032	0.999545	2810414N06Rik	1	151748949	151755018	-	1381	lincRNA	RIKEN cDNA 2810414N06 gene [Source:MGI Symbol;Acc:MGI:1919065]	-	46	30	37	49	49	25	18	21	26	39	1.27544	0.838665	1.01227	1.34883	1.17615	0.681214	0.495097	0.656425	0.673824	1.03833
ENSMUSG00000097160	14.0416	12.0577	6.04442	2.01767	14.9112	0	0	3.43096	5.67748	2.9147	9.81451	2.40463	2.03316	0.0120174	0.999545	A630072L19Rik	12	100941742	100949875	+	4663	antisense	RIKEN cDNA A630072L19 gene [Source:MGI Symbol;Acc:MGI:3641830]	-	14	12	6	2	17	0	0	3	6	3	0.114963	0.0993521	0.0486155	0.016305	0.120849	0	0	0.0277725	0.0460524	0.023655
ENSMUSG00000115406	23.0683	14.0673	7.05182	19.1678	6.1399	19.7732	34.394	33.1659	20.8174	29.147	13.899	27.4595	-0.987331	0.0120773	0.999545	Gm49300	15	31368362	31370305	+	1944	TEC	predicted gene, 49300 [Source:MGI Symbol;Acc:MGI:6118795]	-	23	14	7	19	7	20	35	29	22	30	0.453031	0.278031	0.136047	0.371546	0.119361	0.387142	0.683885	0.643963	0.405035	0.567403
ENSMUSG00000026617	965.861	952.557	904.648	894.835	926.248	1068.74	1087.83	1094.48	953.816	1070.67	928.83	1055.11	-0.183504	0.0120991	0.999545	Bpnt1	1	185332149	185357777	+	2308	protein_coding	bisphosphate 3'-nucleotidase 1 [Source:MGI Symbol;Acc:MGI:1338800]	-	963	948	898	887	1056	1081	1107	957	1008	1102	15.9767	15.8575	14.7004	14.6098	15.1666	17.6249	18.219	17.8993	15.6312	17.5555
ENSMUSG00000014418	488.447	457.187	541.983	567.973	580.659	408.316	424.52	460.892	459.876	457.608	527.25	442.242	0.254438	0.0121999	0.999545	Hps5	7	46760466	46796064	-	6497	protein_coding	HPS5, biogenesis of lysosomal organelles complex 2 subunit 2 [Source:MGI Symbol;Acc:MGI:2180307]	-	487	455	538	563	662	413	432	403	486	471	2.8702	2.70371	3.12866	3.29421	3.37758	2.39207	2.5257	2.67764	2.67726	2.66547
ENSMUSG00000098422	1.00297	0	0	0	0	4.94329	2.94806	3.43096	3.78498	0	0.200594	3.02146	-3.49006	0.0123125	0.999545	Mir7016	4	129684500	129684571	-	72	miRNA	microRNA 7016 [Source:MGI Symbol;Acc:MGI:5531376]	-	1	0	0	0	0	5	3	3	4	0	0.531819	0	0	0	0	2.61321	1.58271	1.79866	1.98836	0
ENSMUSG00000026807	41.1218	23.1106	35.2591	14.1237	20.174	45.4783	40.2901	56.039	50.151	34.0048	26.7578	45.1927	-0.756645	0.0123865	0.999545	Ak8	2	28700164	28813165	+	1873	protein_coding	adenylate kinase 8 [Source:MGI Symbol;Acc:MGI:1916120]	-	41	23	35	14	23	46	41	49	53	35	0.83819	0.47408	0.706023	0.284149	0.407052	0.924181	0.831491	1.12932	1.01276	0.687063
ENSMUSG00000115750	1.00297	2.00961	1.0074	0	0	4.94329	5.89611	2.28731	3.78498	4.85784	0.803997	4.35391	-2.4728	0.0124767	0.999545	Gm49282	15	36842816	36844338	+	921	lincRNA	predicted gene, 49282 [Source:MGI Symbol;Acc:MGI:6118767]	-	1	2	1	0	0	5	6	2	4	5	0.0415754	0.0838362	0.0410231	0	0	0.20429	0.247459	0.0937411	0.155441	0.199608
ENSMUSG00000004540	0	0	0	0	0.877128	4.94329	1.96537	2.28731	1.89249	1.94313	0.175426	2.60632	-3.27859	0.0125204	0.999545	Psg17	7	18813937	18821607	-	2100	protein_coding	pregnancy specific glycoprotein 17 [Source:MGI Symbol;Acc:MGI:1347250]	-	0	0	0	0	1	5	2	2	2	2	0	0	0	0	0.0157849	0.0895958	0.0361761	0.0411122	0.0340861	0.0350169
ENSMUSG00000041801	586.738	579.774	777.715	741.492	1091.15	593.195	480.533	609.567	617.899	427.49	755.373	545.737	0.469703	0.0125429	0.999545	Phlda3	1	135766119	135769136	+	1559	protein_coding	pleckstrin homology like domain, family A, member 3 [Source:MGI Symbol;Acc:MGI:1351485]	-	585	577	772	735	1244	600	489	533	653	440	14.3683	14.2886	18.7094	17.9224	26.4505	14.4825	11.9145	14.7584	14.9911	10.377
ENSMUSG00000097286	13.0386	26.125	22.1629	16.1413	8.77128	26.6938	20.6364	46.8898	34.0649	30.1186	17.2478	31.6807	-0.879177	0.0125762	0.999545	Gm26684	15	54952070	54964642	+	8887	bidirectional_promoter_lncRNA	predicted gene, 26684 [Source:MGI Symbol;Acc:MGI:5477178]	-	13	26	22	16	10	27	21	41	36	31	0.0560125	0.112948	0.0935311	0.0684416	0.0372997	0.114326	0.0897585	0.199154	0.144982	0.128255
ENSMUSG00000106269	9.02674	6.02884	11.0814	5.04417	1.75426	2.96598	0.982685	2.28731	1.89249	0	6.58709	1.62569	2.02345	0.012651	0.999545	4930580E04Rik	5	23387109	23388601	+	690	lincRNA	RIKEN cDNA 4930580E04 gene [Source:MGI Symbol;Acc:MGI:1923106]	-	9	6	11	5	2	3	1	2	2	0	0.499448	0.335709	0.602327	0.275471	0.0960818	0.16361	0.0550507	0.125124	0.10374	0
ENSMUSG00000049538	112.333	135.649	156.147	191.678	322.783	129.514	103.182	117.796	141.937	77.7254	183.718	114.031	0.689758	0.0128272	0.999545	Adamts16	13	70727802	70841811	-	6836	protein_coding	a disintegrin-like and metallopeptidase (reprolysin type) with thrombospondin type 1 motif, 16 [Source:MGI Symbol;Acc:MGI:2429637]	-	112	135	155	190	368	131	105	103	150	80	0.627354	0.762418	0.856679	1.05659	1.78446	0.721118	0.583444	0.650421	0.785337	0.430283
ENSMUSG00000017718	43.1277	38.1827	33.2443	33.2915	88.59	26.6938	20.6364	21.7294	28.3874	35.948	47.2872	26.679	0.828644	0.0128364	0.999545	Afmid	11	117825924	117839908	+	3539	protein_coding	arylformamidase [Source:MGI Symbol;Acc:MGI:2448704]	-	43	38	33	33	101	27	21	19	30	37	0.465248	0.414538	0.352308	0.354478	0.946021	0.287091	0.225398	0.231757	0.303394	0.384404
ENSMUSG00000028476	294.873	348.668	354.606	418.666	348.22	329.223	264.342	307.643	246.024	260.38	353.007	281.522	0.327357	0.0128485	0.999545	Reck	4	43875530	43944806	+	4779	protein_coding	reversion-inducing-cysteine-rich protein with kazal motifs [Source:MGI Symbol;Acc:MGI:1855698]	-	294	347	352	415	397	333	269	269	260	268	2.35563	2.8032	2.78288	3.30116	2.75368	2.62207	2.13809	2.42982	1.94717	2.06188
ENSMUSG00000106812	0	2.00961	1.0074	12.106	3.50851	0	0	1.14365	0	0	3.72631	0.228731	3.75654	0.0129271	0.999545	Gm28563	5	118396806	118397330	-	211	lincRNA	predicted gene 28563 [Source:MGI Symbol;Acc:MGI:5579269]	-	0	2	1	12	4	0	0	1	0	0	0	0.365939	0.179063	2.16199	0.628402	0	0	0.204587	0	0
ENSMUSG00000091370	0	0	0	0	0	3.95464	0	8.00557	1.89249	0.971567	0	2.96485	-4.02921	0.0129685	0.999545	5730435O14Rik	10	41568016	41576476	+	697	processed_transcript	RIKEN cDNA 5730435O14 gene [Source:MGI Symbol;Acc:MGI:1917788]	-	0	0	0	0	0	4	0	7	2	1	0	0	0	0	0	0.215955	0	0.433536	0.102698	0.0527514
ENSMUSG00000052146	77.2287	82.3942	66.4886	120.051	75.4331	50.4216	49.1343	58.3263	72.861	61.2087	84.3191	58.3904	0.528199	0.0130032	0.999545	Rps10	17	27630418	27636669	-	2311	protein_coding	ribosomal protein S10 [Source:MGI Symbol;Acc:MGI:1914347]	-	77	82	66	119	86	51	50	51	77	63	1.27581	1.36986	1.07903	1.9575	1.23356	0.830438	0.821829	0.952642	1.1925	1.00232
ENSMUSG00000026447	1226.63	1106.29	1006.4	1045.15	956.947	887.816	923.724	718.214	1022.89	793.77	1068.28	869.283	0.296555	0.0130124	0.999545	Pik3c2b	1	133045667	133108687	+	9237	protein_coding	phosphatidylinositol-4-phosphate 3-kinase catalytic subunit type 2 beta [Source:MGI Symbol;Acc:MGI:2685045]	-	1223	1101	999	1036	1091	898	940	628	1081	817	5.06981	4.60169	4.08623	4.26368	3.9152	3.65833	3.86553	2.93487	4.18853	3.25205
ENSMUSG00000071713	16.0475	21.1009	18.1333	27.2385	18.4197	31.6371	42.2555	27.4477	40.6886	23.3176	20.188	33.0693	-0.716751	0.0131041	0.999545	Csf2rb	15	78325752	78353847	+	7277	protein_coding	colony stimulating factor 2 receptor, beta, low-affinity (granulocyte-macrophage) [Source:MGI Symbol;Acc:MGI:1339759]	-	16	21	18	27	21	32	43	24	43	24	0.0841907	0.111411	0.0934563	0.141048	0.0956593	0.165476	0.224454	0.14237	0.211487	0.121262
ENSMUSG00000024246	64.1901	66.3173	74.5478	77.6801	84.2043	108.752	91.3897	80.0557	99.3558	106.872	73.3879	97.2852	-0.407232	0.0131057	0.999545	Thumpd2	17	81026327	81065085	-	1856	protein_coding	THUMP domain containing 2 [Source:MGI Symbol;Acc:MGI:1919417]	-	64	66	74	77	96	110	93	70	105	110	1.32038	1.37286	1.50641	1.57713	1.71456	2.23024	1.90334	1.62809	2.02478	2.17912
ENSMUSG00000030880	765.267	806.86	934.87	947.294	1029.75	744.46	650.538	853.165	719.147	708.272	896.808	735.117	0.287843	0.0131149	0.999545	Polr3e	7	120917744	120947432	+	5024	protein_coding	polymerase (RNA) III (DNA directed) polypeptide E [Source:MGI Symbol;Acc:MGI:1349452]	-	763	803	928	939	1174	753	662	746	760	729	5.81529	6.1706	6.9789	7.10512	7.74602	5.64004	5.00518	6.40986	5.41415	5.33512
ENSMUSG00000027966	624.851	549.629	698.13	814.128	1362.18	502.239	433.364	646.164	616.952	535.333	809.784	546.811	0.567194	0.0131247	0.999545	Col11a1	3	114030540	114220718	+	12744	protein_coding	collagen, type XI, alpha 1 [Source:MGI Symbol;Acc:MGI:88446]	-	623	547	693	807	1553	508	441	565	652	551	1.87188	1.65708	2.05455	2.40726	4.03948	1.50001	1.31445	1.91382	1.83108	1.58969
ENSMUSG00000087343	2.00594	4.01923	3.02221	8.07066	6.1399	8.89793	9.82685	14.8675	10.4087	11.6588	4.65159	11.132	-1.24655	0.0131318	0.999545	1700021N21Rik	4	134448766	134450171	-	904	antisense	RIKEN cDNA 1700021N21 gene [Source:MGI Symbol;Acc:MGI:1916659]	-	2	4	3	8	7	9	10	13	11	12	0.0847146	0.170826	0.125384	0.336416	0.256679	0.374637	0.420188	0.620775	0.435503	0.488067
ENSMUSG00000002791	6.01782	6.02884	0	4.03533	13.1569	1.97732	0	1.14365	0.946246	0.971567	5.84778	1.00776	2.55116	0.0131446	0.999545	Pdxk-ps	17	32076083	32107350	-	2804	transcribed_unprocessed_pseudogene	pyridoxal (pyridoxine, vitamin B6) kinase, pseudogene [Source:MGI Symbol;Acc:MGI:1933201]	-	6	6	0	4	15	2	0	1	1	1	0.0819351	0.0826103	0	0.0542297	0.177326	0.0268404	0	0.0153951	0.0127641	0.0131126
ENSMUSG00000091756	4.01188	6.02884	9.06663	10.0883	21.9282	0.988659	0	9.14923	1.89249	0.971567	10.2248	2.60039	2.03024	0.0133074	0.999545	Gm3095	14	3963547	3970207	+	1568	protein_coding	predicted gene 3095 [Source:MGI Symbol;Acc:MGI:3781271]	-	4	6	9	10	25	1	0	8	2	1	0.0976811	0.147729	0.216863	0.242443	0.528511	0.0239989	0	0.220244	0.045651	0.0234488
ENSMUSG00000024079	114.339	112.538	123.911	112.989	122.798	92.9339	107.113	93.7796	85.1622	81.6116	117.315	92.12	0.350311	0.0136236	0.999545	Eif2ak2	17	78852564	78882573	-	5113	protein_coding	eukaryotic translation initiation factor 2-alpha kinase 2 [Source:MGI Symbol;Acc:MGI:1353449]	-	114	112	123	112	140	94	109	82	90	84	0.85374	0.845675	0.908904	0.832718	0.907637	0.691814	0.809771	0.692305	0.62999	0.604046
ENSMUSG00000030199	231.686	281.346	235.732	267.341	209.634	331.201	317.407	288.201	269.68	297.3	245.148	300.758	-0.296343	0.0136853	0.999545	Etv6	6	134035700	134270158	+	5983	protein_coding	ets variant 6 [Source:MGI Symbol;Acc:MGI:109336]	ETS	231	280	234	265	239	335	323	252	285	306	1.47839	1.80676	1.4777	1.68377	1.32416	2.10699	2.05067	1.8182	1.70487	1.88048
ENSMUSG00000094392	25.0743	31.149	23.1703	23.2032	37.7165	20.7618	15.723	19.4421	12.3012	16.5166	28.0626	16.9489	0.737317	0.0138047	0.999545	Gm3788	3	86672033	86672168	-	136	processed_pseudogene	predicted gene 3788 [Source:MGI Symbol;Acc:MGI:3781961]	-	25	31	23	23	43	21	16	17	13	17	7.03878	8.80003	6.38966	6.42902	10.4807	5.81055	4.46882	5.39597	3.42114	4.59596
ENSMUSG00000114217	0	1.00481	1.0074	1.00883	0	0.988659	7.86148	8.00557	2.83874	1.94313	0.604209	4.32752	-2.85936	0.0139414	0.999545	Gm7054	13	106475936	106476755	+	820	processed_pseudogene	predicted gene 7054 [Source:MGI Symbol;Acc:MGI:3779659]	-	0	1	1	1	0	1	8	7	3	2	0	0.0470812	0.046076	0.0463598	0	0.0458905	0.370585	0.368505	0.130941	0.0896773
ENSMUSG00000037363	428.268	397.904	472.472	521.567	513.12	423.146	381.282	351.102	402.155	372.11	466.666	385.959	0.273728	0.0141042	0.999545	Letm2	8	25578490	25597582	-	7238	protein_coding	leucine zipper-EF-hand containing transmembrane protein 2 [Source:MGI Symbol;Acc:MGI:2444979]	-	427	396	469	517	585	428	388	307	425	383	2.25895	2.11221	2.44818	2.71536	2.67915	2.22516	2.03622	1.83096	2.10154	1.94557
ENSMUSG00000103900	10.0297	13.0625	8.05922	17.1502	14.9112	7.90927	4.91343	5.71827	3.78498	6.80097	12.6426	5.82538	1.12221	0.0141477	0.999545	Gm37500	3	95356130	95357572	+	1443	TEC	predicted gene, 37500 [Source:MGI Symbol;Acc:MGI:5610728]	-	10	13	8	17	17	8	5	5	4	7	0.265357	0.347807	0.209465	0.447856	0.390519	0.208622	0.131618	0.149576	0.0992111	0.17836
ENSMUSG00000027961	30.0891	34.1634	35.2591	22.1943	36.8394	22.7392	19.6537	13.7238	16.0862	25.2607	31.7091	19.4927	0.698668	0.0141855	0.999545	Lrrc39	3	116562973	116583134	+	5230	protein_coding	leucine rich repeat containing 39 [Source:MGI Symbol;Acc:MGI:1924557]	-	30	34	35	22	42	23	20	12	17	26	0.219642	0.25098	0.252845	0.15991	0.2662	0.165487	0.145258	0.0990465	0.116336	0.182784
ENSMUSG00000042045	0	4.01923	4.02961	3.0265	6.1399	12.8526	10.8095	53.7517	0	6.80097	3.44305	16.843	-2.27583	0.0143453	0.999545	Sln	9	53850164	53854560	+	1318	protein_coding	sarcolipin [Source:MGI Symbol;Acc:MGI:1913652]	-	0	4	4	3	7	13	11	47	0	7	0	0.117167	0.114666	0.0865289	0.176053	0.371163	0.317022	1.53937	0	0.195276
ENSMUSG00000105948	13.0386	7.03365	11.0814	8.07066	20.174	9.88659	2.94806	5.71827	1.89249	1.94313	11.8797	4.47771	1.42493	0.0143625	0.999545	Gm43089	9	109541701	109542913	-	275	processed_pseudogene	predicted gene 43089 [Source:MGI Symbol;Acc:MGI:5663226]	-	13	7	11	8	23	10	3	5	2	2	1.81012	0.982713	1.51129	1.10589	2.7724	1.36837	0.414381	0.784868	0.260294	0.267401
ENSMUSG00000108865	2.00594	7.03365	0	1.00883	2.63139	10.8752	3.93074	14.8675	5.67748	8.7441	2.53596	8.81901	-1.78872	0.0143777	0.999545	Gm44617	7	28640443	28645671	+	5229	processed_transcript	predicted gene 44617 [Source:MGI Symbol;Acc:MGI:5753193]	-	2	7	0	1	3	11	4	13	6	9	0.0146456	0.0516821	0	0.00727004	0.0190179	0.079161	0.0290571	0.107321	0.0410676	0.0632835
ENSMUSG00000074221	97.2882	91.4374	95.7033	107.945	103.501	62.2855	58.9611	73.1938	88.0009	88.4126	99.175	74.1708	0.418317	0.0143834	0.999545	Zfp568	7	29983955	30028282	+	7354	protein_coding	zinc finger protein 568 [Source:MGI Symbol;Acc:MGI:2142347]	zf-C2H2	97	91	95	107	118	63	60	64	93	91	0.505062	0.477726	0.488077	0.553115	0.531886	0.322369	0.309913	0.375678	0.452612	0.454972
ENSMUSG00000005952	5.01485	9.04326	7.05182	10.0883	10.5255	1.97732	0.982685	5.71827	0	4.85784	8.34476	2.70722	1.65824	0.0145127	0.999545	Trpv1	11	73234292	73261242	+	3681	protein_coding	transient receptor potential cation channel, subfamily V, member 1 [Source:MGI Symbol;Acc:MGI:1341787]	-	5	9	7	10	12	2	1	5	0	5	0.0520117	0.0943926	0.071849	0.103274	0.108063	0.0204457	0.0103192	0.0586359	0	0.0499426
ENSMUSG00000100807	1.00297	1.00481	1.0074	4.03533	7.89416	0	0	0	0.946246	0	2.98893	0.189249	3.45205	0.0145802	0.999545	Gm29521	9	101770369	101862489	-	4236	processed_transcript	predicted gene 29521 [Source:MGI Symbol;Acc:MGI:5580227]	-	1	1	1	4	9	0	0	0	1	0	0.00903942	0.00911392	0.00891934	0.0358971	0.0704282	0	0	0	0.0084491	0
ENSMUSG00000085749	13.0386	6.02884	6.04442	1.00883	8.77128	2.96598	2.94806	0	1.89249	0	6.9784	1.5613	2.14051	0.0147319	0.999545	Gm12843	4	117295817	117297725	+	891	antisense	predicted gene 12843 [Source:MGI Symbol;Acc:MGI:3651051]	-	13	6	6	1	10	3	3	0	2	0	0.558679	0.259977	0.254426	0.0426656	0.372034	0.126701	0.127895	0	0.0803376	0
ENSMUSG00000027300	261.775	303.452	229.688	248.173	220.159	292.643	349.836	291.632	292.39	328.39	252.649	310.978	-0.301119	0.0147964	0.999545	Ubox5	2	130590002	130630038	-	5585	protein_coding	U box domain containing 5 [Source:MGI Symbol;Acc:MGI:2154658]	-	261	302	228	246	251	296	356	255	309	338	1.78943	2.08759	1.54241	1.67443	1.48974	1.99437	2.42124	1.97095	1.98017	2.22515
ENSMUSG00000074345	263.781	247.182	261.925	155.36	123.675	334.167	289.892	264.184	254.54	392.513	210.385	307.059	-0.546943	0.0149639	0.999545	Tnfaip8l3	9	54023405	54068388	-	4585	protein_coding	tumor necrosis factor, alpha-induced protein 8-like 3 [Source:MGI Symbol;Acc:MGI:2685363]	-	263	246	260	154	141	338	295	231	269	404	2.19641	2.07137	2.14251	1.27684	1.01939	2.77405	2.44396	2.17486	2.09981	3.23973
ENSMUSG00000008932	5.01485	6.02884	5.03701	6.053	8.77128	0.988659	1.96537	4.57461	0.946246	0.971567	6.181	1.88929	1.76126	0.0150861	0.999545	Slc1a7	4	107968332	108013532	+	3360	protein_coding	solute carrier family 1 (glutamate transporter), member 7 [Source:MGI Symbol;Acc:MGI:2444087]	-	5	6	5	6	10	1	2	4	1	1	0.0569806	0.0689403	0.0562237	0.067884	0.0986554	0.0111995	0.0226101	0.0513902	0.0106519	0.0109428
ENSMUSG00000102410	0	0	0	1.00883	0	1.97732	2.94806	3.43096	1.89249	1.94313	0.201767	2.43839	-3.17559	0.0151233	0.999545	Gm36935	10	110037488	110037779	-	292	TEC	predicted gene, 36935 [Source:MGI Symbol;Acc:MGI:5610163]	-	0	0	0	1	0	2	3	3	2	2	0	0	0	0.130189	0	0.257741	0.390256	0.443504	0.24514	0.251834
ENSMUSG00000079383	4.01188	2.00961	1.0074	5.04417	4.38564	0	0.982685	0	0	0.971567	3.29174	0.39085	3.0051	0.0151816	0.999545	Gm3298	14	5015891	5019119	+	700	protein_coding	predicted gene 3298 [Source:MGI Symbol;Acc:MGI:3781476]	-	4	2	1	5	5	0	1	0	0	1	0.218806	0.110304	0.0539747	0.271536	0.236773	0	0.0542642	0	0	0.0525253
ENSMUSG00000068227	22.0654	21.1009	21.1555	34.3003	2.63139	5.93195	16.7056	4.57461	0.946246	4.85784	20.2507	6.60326	1.61225	0.0151924	0.999545	Il2rb	15	78479256	78495271	-	4287	protein_coding	interleukin 2 receptor, beta chain [Source:MGI Symbol;Acc:MGI:96550]	-	22	21	21	34	3	6	17	4	1	5	0.196501	0.189115	0.185078	0.301496	0.0231968	0.0526665	0.150628	0.0402778	0.00834859	0.0428828
ENSMUSG00000046794	11.0327	20.0961	12.0888	10.0883	18.4197	30.6484	18.671	29.735	34.0649	16.5166	14.3451	25.9272	-0.847736	0.0153613	0.999545	Ppp1r3b	8	35375739	35388139	+	6216	protein_coding	protein phosphatase 1, regulatory subunit 3B [Source:MGI Symbol;Acc:MGI:2177268]	-	11	20	12	10	21	31	19	26	36	17	0.0677607	0.124217	0.0729388	0.0611568	0.111987	0.187667	0.116106	0.18056	0.20728	0.100555
ENSMUSG00000037795	387.147	415.99	436.205	364.189	833.272	382.611	319.373	381.98	299.014	295.356	487.361	335.667	0.539283	0.0154463	0.999545	N4bp2	5	65763521	65830108	+	14946	protein_coding	NEDD4 binding protein 2 [Source:MGI Symbol;Acc:MGI:2684414]	-	386	414	433	361	950	387	325	334	316	304	0.988915	1.06939	1.09459	0.918201	2.10697	0.974368	0.825981	0.964675	0.756709	0.747851
ENSMUSG00000001930	279.829	561.687	406.991	872.641	402.602	327.246	284.979	393.417	364.305	267.181	504.75	327.425	0.624522	0.0157382	0.999545	Vwf	6	125546774	125686679	+	16064	protein_coding	Von Willebrand factor [Source:MGI Symbol;Acc:MGI:98941]	-	279	559	404	865	459	331	290	344	385	275	0.665039	1.34344	0.950203	2.047	0.947151	0.775374	0.685734	0.924409	0.857776	0.629427
ENSMUSG00000028256	356.055	412.976	369.717	399.498	432.424	370.747	310.529	317.936	332.132	332.276	394.134	332.724	0.244694	0.0157617	0.999545	Odf2l	3	145118588	145153915	+	11140	protein_coding	outer dense fiber of sperm tails 2-like [Source:MGI Symbol;Acc:MGI:1098600]	-	355	411	367	396	493	375	316	278	351	342	1.22022	1.42435	1.24471	1.35134	1.46697	1.26673	1.07749	1.07726	1.12769	1.12878
ENSMUSG00000113724	0	0	0	0	0	0	0.982685	3.43096	3.78498	4.85784	0	2.61129	-3.85752	0.015832	0.999545	Gm48398	12	18610384	18610600	+	217	processed_pseudogene	predicted gene, 48398 [Source:MGI Symbol;Acc:MGI:6097885]	-	0	0	0	0	0	0	1	3	4	5	0	0	0	0	0	0	0.175046	0.596789	0.659731	0.847182
ENSMUSG00000039720	10.0297	4.01923	21.1555	28.2473	56.1362	7.90927	2.94806	16.0111	10.4087	3.88627	23.9176	8.23269	1.55263	0.0158364	0.999545	Got1l1	8	27197459	27223828	-	1822	protein_coding	glutamic-oxaloacetic transaminase 1-like 1 [Source:MGI Symbol;Acc:MGI:1923865]	-	10	4	21	28	64	8	3	14	11	4	0.210159	0.0847565	0.435471	0.584205	1.16437	0.165226	0.0625438	0.331695	0.216078	0.0807194
ENSMUSG00000033450	28.0832	47.2259	40.2961	32.2827	46.4878	26.6938	21.6191	21.7294	27.4411	29.147	38.8751	25.3261	0.617425	0.0159817	0.999545	Tagap	17	7926000	7934897	+	3080	protein_coding	T cell activation Rho GTPase activating protein [Source:MGI Symbol;Acc:MGI:3615484]	-	28	47	40	32	53	27	22	19	29	30	0.3481	0.589126	0.490679	0.394962	0.570407	0.329875	0.271321	0.266295	0.336988	0.358127
ENSMUSG00000030256	827.451	810.879	900.618	765.704	868.357	776.097	762.564	674.755	721.986	689.813	834.602	725.043	0.202787	0.0161524	0.999545	Bhlhe41	6	145858243	145865558	-	6720	protein_coding	basic helix-loop-helix family, member e41 [Source:MGI Symbol;Acc:MGI:1930704]	bHLH	825	807	894	759	990	785	776	590	763	710	4.7009	4.63623	5.0264	4.29366	4.88344	4.39579	4.38636	3.79003	4.0637	3.88468
ENSMUSG00000078143	0	0	5.03701	2.01767	0.877128	6.92061	7.86148	8.00557	3.78498	4.85784	1.58636	6.2861	-1.99361	0.0162243	0.999545	Gm17344	8	109859984	109868455	-	1643	antisense	predicted gene, 17344 [Source:MGI Symbol;Acc:MGI:4936978]	-	0	0	5	2	1	7	8	7	4	5	0	0	0.11498	0.0462752	0.0201754	0.160324	0.184954	0.183916	0.0871343	0.111892
ENSMUSG00000020695	134.398	108.519	150.103	182.599	156.129	116.662	90.407	123.515	117.335	103.958	146.35	110.375	0.408701	0.016244	0.999545	Mrc2	11	105292643	105351139	+	6674	protein_coding	mannose receptor, C type 2 [Source:MGI Symbol;Acc:MGI:107818]	-	134	108	149	181	178	118	92	108	124	107	0.768803	0.624739	0.843507	1.03097	0.884085	0.665323	0.523616	0.698549	0.66497	0.589473
ENSMUSG00000097247	2.00594	4.01923	1.0074	3.0265	6.1399	5.93195	11.7922	10.2929	4.73123	12.6304	3.23979	9.07573	-1.46368	0.0163464	0.999545	1500012K07Rik	7	75308696	75331419	+	2630	processed_transcript	RIKEN cDNA 1500012K07 gene [Source:MGI Symbol;Acc:MGI:1916204]	-	2	4	1	3	7	6	12	9	5	13	0.0291186	0.0587172	0.0143659	0.0433632	0.0882272	0.0858485	0.173315	0.147722	0.0680426	0.181742
ENSMUSG00000097083	43.1277	23.1106	32.2369	31.2738	14.0341	56.3535	64.8572	42.3152	26.4949	58.294	28.7566	49.663	-0.793463	0.0164028	0.999545	D930019O06Rik	1	39650176	39657390	+	3663	antisense	RIKEN cDNA D930019O06 [Source:MGI Symbol;Acc:MGI:3043219]	-	43	23	32	31	16	57	66	37	28	60	0.449498	0.242411	0.330067	0.321722	0.144792	0.585565	0.684414	0.436038	0.273582	0.602256
ENSMUSG00000110618	49.1456	36.173	25.1851	24.212	9.64841	52.3989	49.1343	43.4588	49.2048	56.3509	28.8728	50.1095	-0.802329	0.0165937	0.999545	Gm39822	11	51898966	51909624	+	2284	lincRNA	predicted gene, 39822 [Source:MGI Symbol;Acc:MGI:5622707]	-	49	36	25	24	11	53	50	38	52	58	0.821479	0.60851	0.413554	0.399458	0.159645	0.873206	0.831545	0.718203	0.814843	0.933681
ENSMUSG00000089797	2.00594	2.00961	1.0074	1.00883	2.63139	5.93195	10.8095	3.43096	4.73123	4.85784	1.73264	5.9523	-1.77229	0.0166487	0.999545	Gm16118	8	114698439	114708006	-	680	antisense	predicted gene 16118 [Source:MGI Symbol;Acc:MGI:3801926]	-	2	2	1	1	3	6	11	3	5	5	0.112621	0.113549	0.0555622	0.0559045	0.146242	0.332032	0.614462	0.190446	0.263165	0.270351
ENSMUSG00000031952	35.104	10.0481	22.1629	31.2738	38.5937	13.8412	12.7749	17.1548	16.0862	14.5735	27.4365	14.8861	0.888038	0.0167554	0.999545	Chst5	8	111889136	111910447	-	2182	protein_coding	carbohydrate (N-acetylglucosamine 6-O) sulfotransferase 5 [Source:MGI Symbol;Acc:MGI:1931825]	-	35	10	22	31	44	14	13	15	17	15	0.6142	0.176932	0.38094	0.540085	0.668433	0.241441	0.226308	0.296754	0.278844	0.252757
ENSMUSG00000108983	0	1.00481	0	0	0	3.95464	4.91343	1.14365	0	4.85784	0.200961	2.97391	-3.47258	0.0168297	0.999545	Gm44926	7	87772567	87774392	+	1826	TEC	predicted gene 44926 [Source:MGI Symbol;Acc:MGI:5753502]	-	0	1	0	0	0	4	5	1	0	5	0	0.0211427	0	0	0	0.0824321	0.104011	0.0236406	0	0.100678
ENSMUSG00000104113	24.0713	15.0721	16.1184	11.0972	17.5426	5.93195	15.723	6.86192	7.56997	4.85784	16.7803	8.18893	1.03316	0.0168643	0.999545	Gm37292	7	31208357	31209114	+	758	TEC	predicted gene, 37292 [Source:MGI Symbol;Acc:MGI:5610520]	-	24	15	16	11	20	6	16	6	8	5	1.21238	0.763982	0.797516	0.55167	0.874623	0.297865	0.801793	0.341697	0.377735	0.242531
ENSMUSG00000087312	30.0891	35.1682	21.1555	27.2385	14.0341	5.93195	20.6364	12.5802	17.0324	10.6872	25.5371	13.3736	0.926922	0.0168686	0.999545	Gm13833	6	31102846	31104646	+	719	lincRNA	predicted gene 13833 [Source:MGI Symbol;Acc:MGI:3650920]	-	30	35	21	27	16	6	21	11	18	11	1.59768	1.87932	1.10352	1.42755	0.737651	0.314021	1.10944	0.660425	0.896005	0.56251
ENSMUSG00000086805	39.1159	19.0913	11.0814	14.1237	29.8224	3.95464	17.6883	14.8675	7.56997	6.80097	22.6469	10.1763	1.16374	0.0169833	0.999545	4932443L11Rik	8	4162522	4206882	-	2827	antisense	RIKEN cDNA 4932443L11 gene [Source:MGI Symbol;Acc:MGI:1926149]	-	39	19	11	14	34	4	18	13	8	7	0.528245	0.259471	0.147013	0.18826	0.39867	0.0532441	0.241857	0.198508	0.101282	0.0910414
ENSMUSG00000038593	466.381	435.081	455.346	665.83	652.584	407.327	367.524	414.003	492.994	377.94	535.044	411.958	0.37753	0.0169875	0.999545	Tctn1	5	122237848	122264460	-	8295	protein_coding	tectonic family member 1 [Source:MGI Symbol;Acc:MGI:3603820]	-	465	433	452	660	744	412	374	362	521	389	2.14651	2.01527	2.05878	3.02471	2.97315	1.86904	1.71264	1.88387	2.24796	1.72425
ENSMUSG00000107319	3.00891	3.01442	2.01481	6.053	1.75426	0.988659	0	0	0.946246	0	3.16908	0.386981	2.94074	0.0170118	0.999545	Gm42670	5	67259971	67261262	-	1292	antisense	predicted gene 42670 [Source:MGI Symbol;Acc:MGI:5662807]	-	3	3	2	6	2	1	0	0	1	0	0.0889109	0.0896437	0.0584866	0.17654	0.051313	0.0291256	0	0	0.0277016	0
ENSMUSG00000037519	1215.6	1174.62	1258.25	1185.38	1347.27	1128.06	1005.29	1040.72	1182.81	1045.41	1236.22	1080.46	0.194352	0.0170928	0.999545	Ppfia1	7	144476758	144553729	-	12556	protein_coding	protein tyrosine phosphatase, receptor type, f polypeptide (PTPRF), interacting protein (liprin), alpha 1 [Source:MGI Symbol;Acc:MGI:1924750]	-	1212	1169	1249	1175	1536	1141	1023	910	1250	1076	3.69613	3.59438	3.75837	3.55748	4.05508	3.41957	3.09482	3.1286	3.56308	3.15085
ENSMUSG00000000753	143.425	151.726	180.325	184.616	223.668	171.038	113.991	146.388	119.227	97.1567	176.752	129.56	0.450833	0.0173295	0.999545	Serpinf1	11	75409769	75422701	-	2359	protein_coding	serine (or cysteine) peptidase inhibitor, clade F, member 1 [Source:MGI Symbol;Acc:MGI:108080]	-	143	151	179	183	255	173	116	128	126	100	2.32116	2.47121	2.86691	2.94903	3.58321	2.75966	1.86785	2.34229	1.91165	1.55861
ENSMUSG00000117126	2.00594	0	1.0074	1.00883	3.50851	3.95464	6.8788	6.86192	6.62372	3.88627	1.50614	5.64107	-1.86762	0.0174353	0.999545	AC154458.1	17	71925232	71927030	-	1799	TEC	novel transcript	-	2	0	1	1	4	4	7	6	7	4	0.0425692	0	0.0210018	0.0211312	0.0737036	0.0836692	0.147801	0.143973	0.139262	0.0817514
ENSMUSG00000063455	1137.37	1308.26	1031.58	1036.07	886.777	1232.86	1395.41	1185.97	1299.2	1444.72	1080.01	1311.63	-0.280891	0.0174705	0.999545	D630045J12Rik	6	38123174	38254009	-	13450	protein_coding	RIKEN cDNA D630045J12 gene [Source:MGI Symbol;Acc:MGI:2669829]	-	1134	1302	1024	1027	1011	1247	1420	1037	1373	1487	3.2284	3.73723	2.87651	2.90271	2.49166	3.48884	4.01031	3.32825	3.65355	4.06495
ENSMUSG00000104540	0	0	1.0074	0	0	2.96598	1.96537	1.14365	2.83874	2.9147	0.201481	2.36569	-3.14692	0.0175736	0.999545	Gm3527	5	18350348	18350807	+	460	processed_pseudogene	predicted gene 3527 [Source:MGI Symbol;Acc:MGI:3781704]	-	0	0	1	0	0	3	2	1	3	3	0	0	0.0821355	0	0	0.245415	0.165152	0.093843	0.233416	0.239789
ENSMUSG00000046808	79.2347	118.567	113.837	113.998	169.286	92.9339	90.407	90.3486	80.4309	72.8675	118.984	85.3976	0.482132	0.0178019	0.999545	Atp10d	5	72203329	72298775	+	7848	polymorphic_pseudogene	ATPase, class V, type 10D [Source:MGI Symbol;Acc:MGI:2450125]	-	79	118	113	113	193	94	92	79	85	75	0.385447	0.580476	0.544011	0.547362	0.815189	0.450719	0.445287	0.434538	0.387638	0.351373
ENSMUSG00000114759	12.0356	30.1442	4.02961	8.07066	7.01703	0.988659	0.982685	3.43096	10.4087	0.971567	12.2594	3.35652	1.85972	0.0178583	0.999545	Gm10257	13	100946405	100946815	-	411	processed_pseudogene	predicted gene 10257 [Source:MGI Symbol;Acc:MGI:3644245]	-	12	30	4	8	8	1	1	3	11	1	1.11798	2.818	0.367711	0.739952	0.645221	0.0915578	0.0924208	0.315093	0.957894	0.0894591
ENSMUSG00000084224	0	0	0	3.0265	0.877128	1.97732	5.89611	2.28731	7.56997	4.85784	0.780726	4.51771	-2.53928	0.0179725	0.999545	Gm12337	11	75427753	75428152	+	400	processed_pseudogene	predicted gene 12337 [Source:MGI Symbol;Acc:MGI:3650615]	-	0	0	0	3	1	2	6	2	8	5	0	0	0	0.285113	0.0828705	0.188151	0.569774	0.215839	0.715808	0.459596
ENSMUSG00000010021	93.2763	73.3509	95.7033	109.963	128.061	90.9566	46.1862	81.1994	70.9685	59.2656	100.071	69.7153	0.52521	0.0181381	0.999545	Kif19a	11	114765388	114790739	+	4068	protein_coding	kinesin family member 19A [Source:MGI Symbol;Acc:MGI:2447024]	-	93	73	95	109	146	92	47	71	75	61	0.875384	0.692792	0.88233	1.01859	1.18968	0.851028	0.438863	0.75342	0.659853	0.551335
ENSMUSG00000046516	147.437	182.875	178.31	174.528	167.532	126.548	148.385	133.807	141.937	143.792	170.136	138.894	0.291661	0.0181839	0.999545	Cox17	16	38346991	38352763	+	5773	protein_coding	cytochrome c oxidase assembly protein 17, copper chaperone [Source:MGI Symbol;Acc:MGI:1333806]	-	147	182	177	173	191	128	151	117	150	148	0.975017	1.21711	1.1584	1.1392	1.09671	0.834345	0.993544	0.874871	0.929943	0.942598
ENSMUSG00000085807	9.02674	6.02884	4.02961	9.0795	15.7883	3.95464	2.94806	0	5.67748	1.94313	8.7906	2.90466	1.57868	0.0182373	0.999545	Ube4bos2	4	149338087	149338531	+	317	antisense	ubiquitination factor E4B, opposite strand 2 [Source:MGI Symbol;Acc:MGI:3651969]	-	9	6	4	9	18	4	3	0	6	2	1.08713	0.730724	0.476749	1.07929	1.88223	0.47483	0.359479	0	0.677421	0.231973
ENSMUSG00000077309	6.01782	7.03365	0	2.01767	0.877128	0	0.982685	0	0	0	3.18925	0.196537	3.52834	0.0183085	0.999545	n-R5s8	X	71131237	71131354	+	118	rRNA	nuclear encoded rRNA 5S 8 [Source:MGI Symbol;Acc:MGI:4421742]	-	6	7	0	2	1	0	1	0	0	0	1.947	2.29022	0	0.644323	0.280917	0	0.321906	0	0	0
ENSMUSG00000062312	56.1664	48.2307	39.2887	61.5388	44.7336	57.3422	81.5629	61.7573	80.4309	66.0666	49.9916	69.432	-0.477566	0.0184222	0.999545	Erbb2	11	98412470	98437716	+	5210	protein_coding	erb-b2 receptor tyrosine kinase 2 [Source:MGI Symbol;Acc:MGI:95410]	-	56	48	39	61	51	58	83	54	85	68	0.411573	0.355684	0.282824	0.44509	0.324483	0.418916	0.605135	0.44742	0.583913	0.479886
ENSMUSG00000097745	37.1099	39.1875	54.3998	41.3622	24.5596	47.4556	53.065	59.47	57.721	70.9244	39.3238	57.7272	-0.558978	0.0186483	0.999545	AI115009	3	152666913	152681432	+	1853	antisense	expressed sequence AI115009 [Source:MGI Symbol;Acc:MGI:2139623]	-	37	39	54	41	28	48	54	52	61	73	0.76458	0.81255	1.10105	0.841132	0.50089	0.974771	1.10695	1.2114	1.17821	1.44848
ENSMUSG00000076612	59.1753	30.1442	25.1851	31.2738	8.77128	26.6938	72.7187	74.3375	70.9685	56.3509	30.9099	60.2139	-0.965371	0.0186819	0.999545	Ighg2c	12	113285325	113288932	-	1326	IG_C_gene	immunoglobulin heavy constant gamma 2C [Source:MGI Symbol;Acc:MGI:2686979]	-	59	30	25	31	10	27	74	65	75	58	1.70375	0.873452	0.712336	0.888738	0.249986	0.766227	2.11982	2.11607	2.02434	1.60824
ENSMUSG00000107946	0	0	0	0	0	2.96598	0.982685	3.43096	0.946246	1.94313	0	2.0538	-3.50238	0.0187037	0.999545	Gm44066	6	128842558	128843171	-	519	lincRNA	predicted gene, 44066 [Source:MGI Symbol;Acc:MGI:5690458]	-	0	0	0	0	0	3	1	3	1	2	0	0	0	0	0	0.217516	0.0731887	0.249525	0.0689603	0.141687
ENSMUSG00000102145	26.0772	39.1875	32.2369	61.5388	25.4367	12.8526	12.7749	32.0223	28.3874	14.5735	36.8954	20.1221	0.878752	0.0187232	0.999545	Gm38056	1	55440904	55445930	+	5027	TEC	predicted gene, 38056 [Source:MGI Symbol;Acc:MGI:5611284]	-	26	39	32	61	29	13	13	28	30	15	0.198044	0.299514	0.240508	0.461293	0.191227	0.0973131	0.0982304	0.240441	0.213589	0.109711
ENSMUSG00000050762	1.00297	0	2.01481	4.03533	8.77128	0.988659	0	0	0	0	3.16488	0.197732	3.53262	0.0187541	0.999545	Prss27	17	24038144	24045954	+	1253	protein_coding	protease, serine 27 [Source:MGI Symbol;Acc:MGI:2450123]	-	1	0	2	4	10	1	0	0	0	0	0.0305594	0	0.060307	0.121357	0.264551	0.0300321	0	0	0	0
ENSMUSG00000022066	9.02674	10.0481	50.3701	5.04417	4.38564	115.673	130.697	76.6248	10.4087	12.6304	15.775	69.2068	-2.13475	0.0187949	0.999545	Entpd4b	14	69555424	69585520	+	8074	protein_coding	ectonucleoside triphosphate diphosphohydrolase 4B [Source:MGI Symbol;Acc:MGI:5435040]	-	9	10	50	5	5	117	133	67	11	13	0.0426825	0.0478159	0.233975	0.0235416	0.0205277	0.545298	0.625712	0.358216	0.0487608	0.0591999
ENSMUSG00000115756	24.0713	27.1298	29.2147	35.3092	36.8394	27.6824	19.6537	17.1548	17.9787	8.7441	30.5129	18.2427	0.744415	0.0188007	0.999545	Gm49519	14	48518236	48560287	+	6779	processed_transcript	predicted gene, 49519 [Source:MGI Symbol;Acc:MGI:6155213]	-	24	27	29	35	42	28	20	15	19	9	0.135563	0.153766	0.16163	0.196272	0.205373	0.155428	0.112067	0.095518	0.100312	0.0488139
ENSMUSG00000097071	9.02674	7.03365	5.03701	4.03533	0	0.988659	1.96537	1.14365	0	0	5.02655	0.819537	2.62873	0.0190269	0.999545	4930544I03Rik	12	90753208	90969798	-	1417	lincRNA	RIKEN cDNA 4930544I03 gene [Source:MGI Symbol;Acc:MGI:1925447]	-	9	7	5	4	0	1	2	1	0	0	0.243203	0.190717	0.133318	0.107311	0	0.0265563	0.0536132	0.0304642	0	0
ENSMUSG00000044125	25.0743	27.1298	10.074	10.0883	5.26277	26.6938	27.5152	29.735	27.4411	37.8911	15.5258	29.8552	-0.950684	0.0192327	0.999545	9530080O11Rik	4	95959715	95967655	-	1725	processed_transcript	RIKEN cDNA 9530080O11 gene [Source:MGI Symbol;Acc:MGI:2441751]	-	25	27	10	10	6	27	28	26	29	39	0.554942	0.604277	0.219028	0.220377	0.115298	0.588995	0.616567	0.650644	0.601694	0.83127
ENSMUSG00000032921	30.0891	29.1394	20.1481	26.2297	55.2591	13.8412	29.4806	14.8675	17.9787	13.6019	32.1731	17.954	0.84502	0.0193077	0.999545	Odf4	11	68921835	68927081	-	1166	protein_coding	outer dense fiber of sperm tails 4 [Source:MGI Symbol;Acc:MGI:2182079]	-	30	29	20	26	63	14	30	13	19	14	0.985188	0.960198	0.648067	0.847677	1.79103	0.451821	0.977314	0.481287	0.583206	0.441465
ENSMUSG00000051169	58.1723	49.2355	59.4368	57.5035	44.7336	71.1834	54.0477	84.6304	86.1084	72.8675	53.8163	73.7675	-0.45598	0.0193584	0.999545	Rpusd3	6	113415319	113419340	-	2159	protein_coding	RNA pseudouridylate synthase domain containing 3 [Source:MGI Symbol;Acc:MGI:2141440]	-	58	49	59	57	51	72	55	74	91	75	1.02866	0.876203	1.0325	1.00364	0.783029	1.25492	0.967657	1.47958	1.50853	1.27725
ENSMUSG00000035557	6.01782	4.01923	7.05182	5.04417	9.64841	1.97732	0.982685	4.57461	0.946246	1.94313	6.35629	2.0848	1.65284	0.0193868	0.999545	Krt17	11	100256217	100261029	-	1551	protein_coding	keratin 17 [Source:MGI Symbol;Acc:MGI:96691]	-	6	4	7	5	11	2	1	4	1	2	0.148128	0.0995656	0.17052	0.12255	0.235094	0.0485238	0.0244906	0.111329	0.0230757	0.0474116
ENSMUSG00000069272	4.01188	2.00961	5.03701	3.0265	2.63139	5.93195	8.84417	9.14923	9.46246	7.77254	3.34328	8.23207	-1.30423	0.0193943	0.999545	Hist1h2ae	13	23570517	23571220	-	704	protein_coding	histone cluster 1, H2ae [Source:MGI Symbol;Acc:MGI:2448290]	-	4	2	5	3	3	6	9	8	10	8	0.217562	0.109678	0.26834	0.161996	0.141257	0.320712	0.485603	0.490543	0.508386	0.417815
ENSMUSG00000041608	331.983	336.61	338.487	328.88	332.432	284.734	280.065	197.852	328.347	249.693	333.678	268.138	0.313094	0.0195502	0.999545	Entpd3	9	120539818	120568327	+	3755	protein_coding	ectonucleoside triphosphate diphosphohydrolase 3 [Source:MGI Symbol;Acc:MGI:1321386]	-	331	335	336	326	379	288	285	173	347	257	3.37532	3.44426	3.38079	3.30037	3.34572	2.88615	2.88301	1.98882	3.3074	2.51646
ENSMUSG00000027978	263.781	256.226	207.525	200.758	88.59	267.927	335.096	408.284	228.992	305.072	203.376	309.074	-0.604353	0.0196508	0.999545	Prss12	3	123446913	123506597	+	2602	protein_coding	protease, serine 12 neurotrypsin (motopsin) [Source:MGI Symbol;Acc:MGI:1100881]	-	263	255	206	199	101	271	341	357	242	314	3.8703	3.7835	2.99122	2.90738	1.28669	3.91921	4.97804	5.92271	3.3287	4.43699
ENSMUSG00000112242	0	0	0	0	0	0	2.94806	5.71827	0.946246	2.9147	0	2.50545	-3.788	0.0197533	0.999545	Gm10747	10	117043746	117045101	+	1014	lincRNA	predicted gene 10747 [Source:MGI Symbol;Acc:MGI:3641810]	-	0	0	0	0	0	0	3	5	1	3	0	0	0	0	0	0	0.112382	0.212859	0.0352963	0.10878
ENSMUSG00000113454	0	0	0	0	0.877128	2.96598	3.93074	3.43096	0.946246	0.971567	0.175426	2.4491	-3.18113	0.0199283	0.999545	Gm47373	12	41386379	41391216	-	784	antisense	predicted gene, 47373 [Source:MGI Symbol;Acc:MGI:6096286]	-	0	0	0	0	1	3	4	3	1	1	0	0	0	0	0.0422809	0.143993	0.193801	0.165183	0.045651	0.0468976
ENSMUSG00000090243	1.00297	0	0	0	2.63139	0	4.91343	13.7238	3.78498	4.85784	0.726871	5.45602	-2.84047	0.0199716	0.999545	Gm16103	1	43785910	43787188	+	1279	processed_pseudogene	predicted gene 16103 [Source:MGI Symbol;Acc:MGI:3802086]	-	1	0	0	0	3	0	5	12	4	5	0.0299382	0	0	0	0.0777519	0	0.148495	0.405014	0.111932	0.143736
ENSMUSG00000045165	33.098	53.2548	40.2961	39.3445	114.027	35.5917	26.5325	27.4477	30.2799	39.8342	56.004	31.9372	0.81392	0.0200109	0.999545	AI467606	7	127091359	127093986	+	1932	protein_coding	expressed sequence AI467606 [Source:MGI Symbol;Acc:MGI:2141979]	-	33	53	40	39	130	36	27	24	32	41	0.654038	1.05908	0.782243	0.767385	2.23047	0.701185	0.530846	0.536245	0.592802	0.780267
ENSMUSG00000045532	245.728	190.913	260.917	232.032	276.295	236.289	177.866	140.669	169.378	202.086	241.177	185.258	0.379647	0.0200317	0.999545	C1ql1	11	102939264	102946688	-	1473	protein_coding	complement component 1, q subcomponent-like 1 [Source:MGI Symbol;Acc:MGI:1344400]	-	245	190	259	230	315	239	181	123	179	208	6.36883	4.9798	6.64333	5.93582	7.08872	6.10565	4.66753	3.60464	4.34928	5.19191
ENSMUSG00000086799	4.01188	4.01923	7.05182	4.03533	3.50851	0	0.982685	1.14365	2.83874	0	4.52536	0.993015	2.17649	0.0200376	0.999545	4930502E09Rik	11	84829178	84830868	+	755	processed_transcript	RIKEN cDNA 4930502E09 gene [Source:MGI Symbol;Acc:MGI:1922245]	-	4	4	7	4	4	0	1	1	3	0	0.202866	0.204538	0.3503	0.201404	0.17562	0	0.0503112	0.0571758	0.142214	0
ENSMUSG00000037613	31.0921	24.1154	38.2813	54.477	29.8224	14.8299	24.5671	25.1604	17.9787	26.2323	35.5576	21.7537	0.709926	0.0201138	0.999545	Tnfrsf23	7	143665809	143685872	-	3962	protein_coding	tumor necrosis factor receptor superfamily, member 23 [Source:MGI Symbol;Acc:MGI:1930269]	-	31	24	38	54	34	15	25	22	19	27	0.299601	0.233861	0.362375	0.518125	0.284462	0.142467	0.239683	0.2397	0.171635	0.250562
ENSMUSG00000031661	346.025	304.456	429.154	415.639	407.865	350.974	271.221	277.908	349.165	214.716	380.628	292.797	0.378347	0.020178	0.999545	Nkd1	8	88521354	88594884	+	4558	protein_coding	naked cuticle 1 [Source:MGI Symbol;Acc:MGI:2135954]	-	345	303	426	412	465	355	276	243	369	221	2.89829	2.56643	3.53121	3.4362	3.38173	2.93083	2.3001	2.3014	2.89747	1.78273
ENSMUSG00000105784	4.01188	4.01923	2.01481	1.00883	5.26277	0	0	0	0	1.94313	3.2635	0.388627	2.99526	0.0201854	0.999545	Gm35065	3	123444328	123447447	-	428	antisense	predicted gene, 35065 [Source:MGI Symbol;Acc:MGI:5594224]	-	4	4	2	1	6	0	0	0	0	2	0.35786	0.360809	0.176553	0.0888202	0.464695	0	0	0	0	0.171812
ENSMUSG00000046748	0	1.00481	4.02961	8.07066	0.877128	0	0	0	0	0	2.79644	0	3.91618	0.0202765	0.999545	Tmem45a2	16	57036967	57071372	-	4758	protein_coding	transmembrane protein 45A2 [Source:MGI Symbol;Acc:MGI:1916707]	-	0	1	4	8	1	0	0	0	0	0	0	0.00811403	0.0317632	0.0639177	0.00696684	0	0	0	0	0
ENSMUSG00000003341	6.01782	11.0529	9.06663	16.1413	22.8053	11.8639	2.94806	4.57461	0	2.9147	13.0168	4.46026	1.55562	0.020277	0.999545	Atp8b3	10	80519584	80539124	-	4713	protein_coding	ATPase, class I, type 8B, member 3 [Source:MGI Symbol;Acc:MGI:1914581]	-	6	11	9	16	26	12	3	4	0	3	0.0487473	0.0901066	0.0721496	0.129056	0.182867	0.0958122	0.0241788	0.0366372	0	0.023404
ENSMUSG00000022849	146.434	103.495	86.6366	182.599	117.535	86.0133	92.3724	102.929	91.7859	82.5832	127.34	91.1367	0.483329	0.020414	0.999545	Hspbap1	16	35770375	35828477	+	9423	protein_coding	Hspb associated protein 1 [Source:MGI Symbol;Acc:MGI:1913917]	-	146	103	86	181	134	87	94	90	97	85	0.593281	0.421997	0.344824	0.730205	0.471385	0.34743	0.378922	0.4123	0.368425	0.331662
ENSMUSG00000031698	39.1159	20.0961	16.1184	31.2738	14.0341	16.8072	68.788	104.072	26.4949	39.8342	24.1277	51.1994	-1.08371	0.0204519	0.999545	Mylk3	8	85324303	85386345	-	4283	protein_coding	myosin light chain kinase 3 [Source:MGI Symbol;Acc:MGI:2443063]	-	39	20	16	31	16	17	70	91	28	41	0.348669	0.180278	0.141143	0.27515	0.123832	0.149361	0.620814	0.917176	0.233979	0.351967
ENSMUSG00000077387	5.01485	2.00961	0	1.00883	7.01703	0.988659	0	0	0	0	3.01007	0.197732	3.45851	0.0204783	0.999545	Gm22656	5	25510865	25511035	+	171	snRNA	predicted gene, 22656 [Source:MGI Symbol;Acc:MGI:5452433]	-	5	2	0	1	8	1	0	0	0	0	1.11962	0.451539	0	0.22231	1.55079	0.22006	0	0	0	0
ENSMUSG00000019359	112.333	160.769	199.466	249.182	464.878	150.276	91.3897	180.697	151.399	133.105	237.325	141.373	0.749234	0.0206696	0.999545	Gdpd2	X	100729873	100738895	+	4609	protein_coding	glycerophosphodiester phosphodiesterase domain containing 2 [Source:MGI Symbol;Acc:MGI:1918834]	-	112	160	198	247	530	152	93	158	160	137	0.930482	1.34021	1.62311	2.03726	3.81179	1.24101	0.766457	1.47982	1.24245	1.0929
ENSMUSG00000086453	14.0416	15.0721	14.1036	18.159	12.2798	8.89793	7.86148	4.57461	10.4087	6.80097	14.7312	7.70874	0.919383	0.02075	0.999545	Gm11457	2	164754242	164769666	-	735	antisense	predicted gene 11457 [Source:MGI Symbol;Acc:MGI:3705139]	-	14	15	14	18	14	9	8	4	11	7	0.729352	0.787889	0.719663	0.930981	0.631394	0.460778	0.413442	0.234927	0.535639	0.350169
ENSMUSG00000020062	3.00891	0	2.01481	5.04417	3.50851	0	0	0	0	0.971567	2.71528	0.194313	3.30288	0.0207877	0.999545	Slc5a8	10	88885992	88929515	+	5331	protein_coding	solute carrier family 5 (iodide transporter), member 8 [Source:MGI Symbol;Acc:MGI:2384916]	-	3	0	2	5	4	0	0	0	0	1	0.0215481	0	0.0141746	0.0356547	0.024872	0	0	0	0	0.00689696
ENSMUSG00000020653	122.362	137.659	134.992	96.848	143.849	146.321	193.589	185.272	136.259	162.252	127.142	164.739	-0.370994	0.0210952	0.999545	Klf11	12	24651274	24662789	+	4340	protein_coding	Kruppel-like factor 11 [Source:MGI Symbol;Acc:MGI:2653368]	zf-C2H2	122	137	134	96	164	148	197	162	144	167	1.07638	1.21869	1.16655	0.840886	1.25261	1.28324	1.7242	1.61133	1.18752	1.41479
ENSMUSG00000097404	14.0416	24.1154	14.1036	8.07066	10.5255	32.6257	25.5498	12.5802	31.2261	26.2323	14.1714	25.6428	-0.865388	0.0212831	0.999545	Gm10814	19	6012620	6018426	+	1933	lincRNA	predicted gene 10814 [Source:MGI Symbol;Acc:MGI:3642580]	-	14	24	14	8	12	33	26	11	33	27	0.277327	0.479337	0.273643	0.157331	0.205783	0.64242	0.51092	0.245652	0.611011	0.513569
ENSMUSG00000056999	754.234	810.879	707.197	694.077	691.177	873.974	912.915	791.408	831.75	789.884	731.513	839.986	-0.200076	0.0213788	0.999545	Ide	19	37268743	37337852	-	5823	protein_coding	insulin degrading enzyme [Source:MGI Symbol;Acc:MGI:96412]	-	752	807	702	688	788	884	929	692	879	813	4.94501	5.35042	4.5549	4.49156	4.4858	5.71271	6.06011	5.13002	5.40267	5.13346
ENSMUSG00000103082	34.101	37.1779	35.2591	65.5741	58.7676	22.7392	32.4286	41.1715	25.5486	25.2607	46.1759	29.4297	0.658462	0.0215224	0.999545	Gm38124	3	45269987	45272567	-	2581	TEC	predicted gene, 38124 [Source:MGI Symbol;Acc:MGI:5611352]	-	34	37	35	65	67	23	33	36	27	26	0.504414	0.553446	0.512352	0.957372	0.860492	0.335333	0.485666	0.602107	0.374406	0.370384
ENSMUSG00000059835	0	1.00481	1.0074	1.00883	0	0.988659	2.94806	5.71827	5.67748	2.9147	0.604209	3.64943	-2.61962	0.0215777	0.999545	Rpl13-ps3	14	58893506	58894129	+	624	processed_pseudogene	ribosomal protein L13, pseudogene 3 [Source:MGI Symbol;Acc:MGI:3646682]	-	0	1	1	1	0	1	3	5	6	3	0	0.0618695	0.0605486	0.0609216	0	0.0603049	0.18262	0.345896	0.344139	0.176768
ENSMUSG00000048572	34.101	51.2452	47.3479	120.051	50.8735	24.7165	26.5325	45.7461	48.2586	26.2323	60.7237	34.2972	0.825377	0.0216488	0.999545	Tmem252	19	24674008	24679661	+	2462	protein_coding	transmembrane protein 252 [Source:MGI Symbol;Acc:MGI:3583948]	-	34	51	47	119	58	25	27	40	51	27	0.528795	0.79973	0.721271	1.83745	0.780908	0.38211	0.416569	0.701345	0.741393	0.40322
ENSMUSG00000057751	234.695	228.091	270.991	359.145	715.737	240.244	150.351	292.775	207.228	228.318	361.732	223.783	0.694343	0.0216839	0.999545	Megf6	4	154170730	154275713	+	7877	protein_coding	multiple EGF-like-domains 6 [Source:MGI Symbol;Acc:MGI:1919351]	-	234	227	269	356	816	243	153	256	219	235	1.1375	1.11257	1.29027	1.71809	3.43391	1.16087	0.737806	1.40294	0.995061	1.09692
ENSMUSG00000098916	1.00297	9.04326	3.02221	2.01767	5.26277	0	0	1.14365	1.89249	0	4.06978	0.607229	2.75829	0.0217914	0.999545	Gm27749	19	50144491	50144615	+	125	miRNA	predicted gene, 27749 [Source:MGI Symbol;Acc:MGI:5531131]	-	1	9	3	2	6	0	0	1	2	0	0.306328	2.77967	0.906776	0.608241	1.59111	0	0	0.345342	0.572646	0
ENSMUSG00000114612	23.0683	16.0769	11.0814	16.1413	14.9112	7.90927	12.7749	9.14923	5.67748	7.77254	16.2558	8.65668	0.911483	0.0218873	0.999545	Gm47550	13	98732986	98734690	+	1705	TEC	predicted gene, 47550 [Source:MGI Symbol;Acc:MGI:6096567]	-	23	16	11	16	17	8	13	8	6	8	0.516535	0.36229	0.243757	0.356739	0.33051	0.176564	0.289621	0.202547	0.125949	0.172517
ENSMUSG00000073394	4.01188	2.00961	1.0074	4.03533	0	7.90927	2.94806	10.2929	9.46246	4.85784	2.21285	7.0941	-1.69767	0.0219192	0.999545	Runx2os1	17	44735845	44737612	+	792	antisense	runt related transcription factor 2, opposite strand 1 [Source:MGI Symbol;Acc:MGI:3641707]	-	4	2	1	4	0	8	3	9	10	5	0.193389	0.0974913	0.047705	0.191995	0	0.380103	0.143882	0.490543	0.451899	0.232119
ENSMUSG00000019970	2370.02	2447.71	3883.54	4249.2	3711.13	1246.7	1204.77	4074.84	2247.33	1286.35	3332.32	2012	0.728097	0.0220432	0.999545	Sgk1	10	21882184	21999903	+	4903	protein_coding	serum/glucocorticoid regulated kinase 1 [Source:MGI Symbol;Acc:MGI:1340062]	-	2363	2436	3855	4212	4231	1261	1226	3563	2375	1324	18.4543	19.1812	29.7065	32.6574	28.6049	9.6781	9.49818	31.3699	17.3368	9.92871
ENSMUSG00000058392	448.328	472.259	600.412	613.37	625.393	422.157	390.126	441.45	537.468	424.575	551.952	443.155	0.31687	0.0220656	0.999545	Rrp1b	17	32036100	32062865	+	7702	protein_coding	ribosomal RNA processing 1 homolog B (S. cerevisiae) [Source:MGI Symbol;Acc:MGI:1919712]	-	447	470	596	608	713	427	397	386	568	437	2.22229	2.35589	2.92369	3.00093	3.06864	2.08623	1.95794	2.16343	2.63944	2.08614
ENSMUSG00000103209	9.02674	12.0577	13.0962	19.1678	5.26277	8.89793	2.94806	3.43096	3.78498	5.8294	11.7223	4.97827	1.22392	0.0221421	0.999545	Gm37331	1	25296512	25299886	-	3375	TEC	predicted gene, 37331 [Source:MGI Symbol;Acc:MGI:5610559]	-	9	12	13	19	6	9	3	3	4	6	0.102109	0.137268	0.145532	0.214011	0.0589301	0.100347	0.0337644	0.0383713	0.0424183	0.0653648
ENSMUSG00000115700	2.00594	3.01442	3.02221	5.04417	1.75426	2.96598	7.86148	8.00557	17.0324	5.8294	2.9682	8.33897	-1.50316	0.0222619	0.999545	Gm7517	15	48888353	48890024	+	1672	processed_pseudogene	predicted gene 7517 [Source:MGI Symbol;Acc:MGI:3643004]	-	2	3	3	5	2	3	8	7	18	6	0.0458026	0.0692702	0.0677912	0.113681	0.039651	0.0675184	0.181746	0.180726	0.385303	0.131942
ENSMUSG00000054115	221.657	207.995	225.658	220.934	219.282	179.936	177.866	162.399	193.98	204.029	219.105	183.642	0.252519	0.0222904	0.999545	Skp2	15	9111985	9155425	-	7875	protein_coding	S-phase kinase-associated protein 2 (p45) [Source:MGI Symbol;Acc:MGI:1351663]	-	221	207	224	219	250	182	181	142	205	210	1.07458	1.0148	1.0747	1.05718	1.05232	0.869677	0.873051	0.77839	0.931687	0.980472
ENSMUSG00000083849	0	2.00961	0	0	0	2.96598	4.91343	2.28731	2.83874	1.94313	0.401923	2.98972	-2.90214	0.0224076	0.999545	Gm13477	2	44788265	44790951	+	2687	processed_pseudogene	predicted gene 13477 [Source:MGI Symbol;Acc:MGI:3652109]	-	0	2	0	0	0	3	5	2	3	2	0	0.0287358	0	0	0	0.0420137	0.0706828	0.0321308	0.0399595	0.0273671
ENSMUSG00000045730	43.1277	41.1971	35.2591	41.3622	33.3309	30.6484	23.5844	29.735	21.7637	28.1754	38.8554	26.7814	0.538179	0.0226214	0.999545	Adrb2	18	62177817	62179959	-	2143	protein_coding	adrenergic receptor, beta 2 [Source:MGI Symbol;Acc:MGI:87938]	-	43	41	35	41	38	31	24	26	23	29	0.768321	0.738623	0.61707	0.727306	0.587789	0.544348	0.425403	0.523734	0.384125	0.497556
ENSMUSG00000102644	58.1723	89.4278	80.5922	52.4593	68.416	63.2742	53.065	44.6025	45.4198	40.8058	69.8135	49.4335	0.49703	0.0230339	0.999545	Thap6	5	91962389	91972066	+	4119	transcribed_unitary_pseudogene	THAP domain containing 6 [Source:MGI Symbol;Acc:MGI:1922436]	-	58	89	80	52	78	64	54	39	48	42	0.539179	0.834179	0.733815	0.479918	0.627716	0.584689	0.497982	0.408726	0.417077	0.374907
ENSMUSG00000019969	1016.01	1046	1063.82	1041.12	975.367	1133.99	1209.69	1151.66	1126.98	1091.07	1028.46	1142.68	-0.152178	0.0230997	0.999545	Psen1	12	83688152	83735199	+	4557	protein_coding	presenilin 1 [Source:MGI Symbol;Acc:MGI:1202717]	-	1013	1041	1056	1032	1112	1147	1231	1007	1191	1123	8.51191	8.81927	8.75535	8.60907	8.08883	9.47156	10.261	9.53916	9.35404	9.06081
ENSMUSG00000104120	0	3.01442	12.0888	14.1237	14.9112	0	3.93074	3.43096	0.946246	1.94313	8.82762	2.05022	2.12305	0.0231076	0.999545	Gm37484	9	86712004	86714526	+	2523	TEC	predicted gene, 37484 [Source:MGI Symbol;Acc:MGI:5610712]	-	0	3	12	14	17	0	4	3	1	2	0	0.0459055	0.179702	0.210944	0.223353	0	0.0602219	0.0513291	0.0141857	0.029146
ENSMUSG00000039321	1.00297	4.01923	6.04442	3.0265	7.01703	0.988659	0.982685	2.28731	0	0	4.22203	0.85173	2.3766	0.0231822	0.999545	Uts2r	11	121160271	121161973	+	1703	protein_coding	urotensin 2 receptor [Source:MGI Symbol;Acc:MGI:2183450]	-	1	4	6	3	8	1	1	2	0	0	0.0224844	0.090679	0.133114	0.0669672	0.155717	0.0220964	0.0223047	0.0506961	0	0
ENSMUSG00000111800	2.00594	2.00961	1.0074	0	0.877128	1.97732	3.93074	11.4365	2.83874	4.85784	1.18002	5.00823	-2.07277	0.023339	0.999545	Gm31557	9	46666273	46674844	+	1229	lincRNA	predicted gene, 31557 [Source:MGI Symbol;Acc:MGI:5590716]	-	2	2	1	0	1	2	4	10	3	5	0.0623124	0.062826	0.0307423	0	0.0269717	0.0612372	0.123629	0.351243	0.0873647	0.149584
ENSMUSG00000098327	1.00297	0	0	0	1.75426	1.97732	0.982685	10.2929	3.78498	2.9147	0.551446	3.99051	-2.77961	0.0234122	0.999545	Mir7087	9	45939521	45939590	-	70	miRNA	microRNA 7087 [Source:MGI Symbol;Acc:MGI:5530655]	-	1	0	0	0	2	2	1	9	4	3	0.547014	0	0	0	0.947092	1.07515	0.542642	5.55014	2.04517	1.57576
ENSMUSG00000086771	1.00297	7.03365	3.02221	4.03533	0	6.92061	3.93074	6.86192	17.0324	11.6588	3.01883	9.2809	-1.6425	0.0235205	0.999545	1700080G11Rik	4	127531622	127532885	+	436	lincRNA	RIKEN cDNA 1700080G11 gene [Source:MGI Symbol;Acc:MGI:1920738]	-	1	7	3	4	0	7	4	6	18	12	0.0878234	0.61983	0.25997	0.348762	0	0.604155	0.348486	0.594052	1.47759	1.01196
ENSMUSG00000108217	2.00594	0	5.03701	5.04417	4.38564	0.988659	0	0	0	0.971567	3.29455	0.392045	3.00517	0.02356	0.999545	Gm43883	6	46785953	46789702	+	3750	TEC	predicted gene, 43883 [Source:MGI Symbol;Acc:MGI:5690275]	-	2	0	5	5	5	1	0	0	0	1	0.0204219	0	0.0503764	0.0506867	0.0441976	0.0100347	0	0	0	0.00980472
ENSMUSG00000084876	7.02079	3.01442	2.01481	4.03533	1.75426	0.988659	0.982685	0	0.946246	0	3.56792	0.583518	2.57302	0.0237104	0.999545	Gm14965	19	6409400	6418606	-	1232	processed_transcript	predicted gene 14965 [Source:MGI Symbol;Acc:MGI:3705214]	-	7	3	2	4	2	1	1	0	1	0	0.217562	0.0940095	0.0613349	0.123425	0.053812	0.030544	0.0308319	0	0.0290507	0
ENSMUSG00000022076	137.407	177.851	132.977	96.848	223.668	136.435	134.628	93.7796	69.076	73.8391	153.75	101.551	0.599892	0.0237245	0.999545	Klhl1	14	96102736	96519102	-	6645	protein_coding	kelch-like 1 [Source:MGI Symbol;Acc:MGI:2136335]	-	137	177	132	96	255	138	137	82	73	76	0.789445	1.02835	0.750529	0.549202	1.27205	0.781486	0.783136	0.532695	0.393183	0.420519
ENSMUSG00000051359	8474.1	7803.33	8260.7	8281.51	5434.69	8584.52	9236.26	9261.31	9528.7	10028.5	7650.87	9327.86	-0.286002	0.023831	0.999545	Ncald	15	37366175	37792570	-	8581	protein_coding	neurocalcin delta [Source:MGI Symbol;Acc:MGI:1196326]	-	8449	7766	8200	8209	6196	8683	9399	8098	10070	10322	37.702	34.9398	36.1048	36.367	23.935	38.0775	41.6059	40.738	42.0009	44.2275
ENSMUSG00000058626	8.02377	7.03365	2.01481	4.03533	12.2798	5.93195	14.7403	4.57461	6.62372	82.5832	6.67747	22.8908	-1.77376	0.023875	0.999545	Capn11	17	45630204	45659325	-	2708	protein_coding	calpain 11 [Source:MGI Symbol;Acc:MGI:1352490]	-	8	7	2	4	14	6	15	4	7	85	0.11312	0.0997954	0.0279042	0.0561522	0.171372	0.0833757	0.210404	0.0637633	0.0925158	1.15408
ENSMUSG00000076618	5.01485	7.03365	4.02961	3.0265	1.75426	0	1.96537	0	0	1.94313	4.17177	0.781701	2.38371	0.0238771	0.999545	Ighj4	12	113428514	113428567	-	54	IG_J_gene	immunoglobulin heavy joining 4 [Source:MGI Symbol;Acc:MGI:4439658]	-	5	7	4	3	2	0	2	0	0	2	3.54546	5.00455	2.79869	2.11195	1.22771	0	1.40685	0	0	1.36177
ENSMUSG00000078600	0	2.00961	0	0	0	1.97732	0	8.00557	2.83874	5.8294	0.401923	3.73021	-3.20974	0.0242422	0.999545	1700092K14Rik	11	114198258	114199199	+	395	processed_transcript	RIKEN cDNA 1700092K14 gene [Source:MGI Symbol;Acc:MGI:1920786]	-	0	2	0	0	0	2	0	7	3	6	0	0.195476	0	0	0	0.190533	0	0.764998	0.271826	0.558497
ENSMUSG00000086043	77.2287	62.298	82.607	73.6448	82.4501	65.2515	64.8572	52.6081	57.721	39.8342	75.6457	56.0544	0.432801	0.0242568	0.999545	Gm12473	4	43631539	43641533	-	579	antisense	predicted gene 12473 [Source:MGI Symbol;Acc:MGI:3652337]	-	77	62	82	73	94	66	66	46	61	41	5.09224	4.13404	5.35086	4.79292	5.38157	4.28946	4.32989	3.42956	3.77066	2.60359
ENSMUSG00000024391	1.00297	7.03365	4.02961	13.1148	5.26277	0.988659	1.96537	0	1.89249	2.9147	6.08877	1.55224	1.94269	0.0242887	0.999545	Apom	17	35128997	35132050	-	1013	protein_coding	apolipoprotein M [Source:MGI Symbol;Acc:MGI:1930124]	-	1	7	4	13	6	1	2	0	2	3	0.0377996	0.266778	0.14919	0.487854	0.196337	0.0371473	0.074995	0	0.0706622	0.108888
ENSMUSG00000108474	2.00594	7.03365	6.04442	6.053	8.77128	1.97732	1.96537	0	0.946246	3.88627	5.98166	1.75504	1.74922	0.0242998	0.999545	Gm44895	7	54876114	54877651	+	1538	TEC	predicted gene 44895 [Source:MGI Symbol;Acc:MGI:5753471]	-	2	7	6	6	10	2	2	0	1	4	0.0497932	0.175713	0.147395	0.148303	0.215528	0.048934	0.0493953	0	0.0232707	0.0956247
ENSMUSG00000054204	25.0743	10.0481	26.1925	10.0883	4.38564	14.8299	17.6883	35.4533	44.4736	51.4931	15.1578	32.7876	-1.11899	0.0243598	0.999545	Alkal2	12	30884322	30893854	+	1509	protein_coding	ALK and LTK ligand 2 [Source:MGI Symbol;Acc:MGI:3697448]	-	25	10	26	10	5	15	18	31	47	53	0.634377	0.255842	0.650988	0.251922	0.109835	0.374058	0.453101	0.886813	1.11474	1.29138
ENSMUSG00000033316	1200.56	1268.07	1390.22	1399.25	892.04	1325.79	1370.85	1792.1	1452.49	1846.95	1230.03	1557.64	-0.340816	0.0245327	0.999545	Galnt9	5	110544355	110621380	+	3006	protein_coding	polypeptide N-acetylgalactosaminyltransferase 9 [Source:MGI Symbol;Acc:MGI:2677965]	-	1197	1262	1380	1387	1017	1341	1395	1567	1535	1901	15.2476	16.2081	17.3452	17.5405	11.2148	16.7871	17.6277	22.503	18.2762	23.252
ENSMUSG00000042961	56.1664	69.3317	73.5404	76.6713	106.133	63.2742	55.0304	58.3263	53.936	45.6637	76.3685	55.2461	0.47204	0.0245813	0.999545	Egflam	15	7206120	7398395	-	6121	protein_coding	EGF-like, fibronectin type III and laminin G domains [Source:MGI Symbol;Acc:MGI:2146149]	-	56	69	73	76	121	64	56	51	57	47	0.350318	0.435199	0.450598	0.472005	0.655274	0.393455	0.347518	0.359673	0.333288	0.28232
ENSMUSG00000045052	10.0297	14.0673	9.06663	6.053	19.2968	4.94329	6.8788	3.43096	0	7.77254	11.7027	4.60512	1.35024	0.0245905	0.999545	Prlhr	19	60466733	60468304	-	1572	protein_coding	prolactin releasing hormone receptor [Source:MGI Symbol;Acc:MGI:2135956]	-	10	14	9	6	22	5	7	3	0	8	0.243581	0.343824	0.216311	0.145096	0.463906	0.119689	0.169144	0.0823812	0	0.187113
ENSMUSG00000108268	17.0505	16.0769	7.05182	5.04417	4.38564	0.988659	4.91343	8.00557	1.89249	0.971567	9.92181	3.35434	1.58986	0.0246568	0.999545	Gm44187	6	88040539	88042467	-	1929	TEC	predicted gene, 44187 [Source:MGI Symbol;Acc:MGI:5690579]	-	17	16	7	5	5	1	5	7	2	1	0.337453	0.32022	0.137105	0.0985356	0.0859207	0.0195076	0.0984576	0.156648	0.0371077	0.0190605
ENSMUSG00000116056	20.0594	7.03365	11.0814	4.03533	4.38564	13.8412	22.6018	22.8731	15.1399	20.4029	9.31909	18.9718	-1.03045	0.0246596	0.999545	Gm4544	15	102657111	102660468	+	1360	lincRNA	predicted gene 4544 [Source:MGI Symbol;Acc:MGI:3782728]	-	20	7	11	4	5	14	23	20	16	21	0.563103	0.19871	0.305592	0.111809	0.121868	0.38737	0.642393	0.63482	0.421064	0.567737
ENSMUSG00000038007	133.395	362.735	285.095	436.825	336.817	209.596	231.914	161.255	269.68	128.247	310.973	200.138	0.635287	0.0247374	0.999545	Acer2	4	86874396	86934822	+	7159	protein_coding	alkaline ceramidase 2 [Source:MGI Symbol;Acc:MGI:1920932]	-	133	361	283	433	384	212	236	141	285	132	0.71137	1.94678	1.49356	2.29928	1.77803	1.11435	1.25219	0.85021	1.42482	0.677935
ENSMUSG00000043024	9.02674	9.04326	16.1184	8.07066	20.174	29.6598	13.7576	17.1548	27.4411	26.2323	12.4866	22.8491	-0.865848	0.0247445	0.999545	Gm16433	6	108563605	108565588	-	1984	processed_pseudogene	predicted gene 16433 [Source:MGI Symbol;Acc:MGI:3645626]	-	9	9	16	8	23	30	14	15	29	27	0.173699	0.175131	0.304696	0.153286	0.384279	0.569006	0.268039	0.326369	0.523146	0.500367
ENSMUSG00000021456	4.01188	0	3.02221	6.053	0.877128	0	0	0	0	0.971567	2.79284	0.194313	3.33593	0.0247769	0.999545	Fbp2	13	62836877	62858422	-	1469	protein_coding	fructose bisphosphatase 2 [Source:MGI Symbol;Acc:MGI:95491]	-	4	0	3	6	1	0	0	0	0	1	0.104264	0	0.0771593	0.155269	0.0225652	0	0	0	0	0.0250291
ENSMUSG00000022548	4053	4802.98	5858.05	6513.03	4933.85	4160.28	3689	4246.39	5129.6	2927.33	5232.18	4030.52	0.376436	0.0249508	0.999545	Apod	16	31296192	31314808	-	2577	protein_coding	apolipoprotein D [Source:MGI Symbol;Acc:MGI:88056]	-	4041	4780	5815	6456	5625	4208	3754	3713	5421	3013	60.0442	71.6102	85.2558	95.2368	72.3549	61.4467	55.3339	62.1971	75.289	42.9884
ENSMUSG00000093528	8.02377	15.0721	11.0814	11.0972	4.38564	15.8185	22.6018	12.5802	19.8712	19.4313	9.93202	18.0606	-0.878491	0.0250748	0.999545	Nrg3os	14	38898302	38958794	+	927	antisense	neuregulin 3, opposite strand [Source:MGI Symbol;Acc:MGI:1922420]	-	8	15	11	11	5	16	23	11	21	20	0.330451	0.624702	0.448334	0.451096	0.178793	0.649497	0.942453	0.512239	0.810786	0.793262
ENSMUSG00000074235	31.0921	35.1682	37.2739	12.106	33.3309	54.3762	59.9438	30.8786	36.9036	60.2372	29.7942	48.4679	-0.703317	0.0250895	0.999545	Gm10649	8	76605226	76900621	-	4038	bidirectional_promoter_lncRNA	predicted gene 10649 [Source:MGI Symbol;Acc:MGI:3642042]	-	31	35	37	12	38	55	61	27	39	62	0.293962	0.334628	0.346198	0.112972	0.311945	0.512547	0.573819	0.28864	0.345673	0.564536
ENSMUSG00000106288	17.0505	29.1394	10.074	16.1413	13.1569	32.6257	52.0823	20.5858	20.8174	27.2039	17.1124	30.663	-0.84637	0.0251122	0.999545	Gm43593	5	107806362	107807707	-	1346	TEC	predicted gene 43593 [Source:MGI Symbol;Acc:MGI:5663730]	-	17	29	10	16	15	33	53	18	22	28	0.483616	0.831791	0.280701	0.451888	0.369408	0.922584	1.49569	0.577281	0.584984	0.764856
ENSMUSG00000021314	3634.77	3331.94	3781.79	2957.9	2403.33	3898.28	4034.91	3779.77	3573.97	4495.44	3221.95	3956.47	-0.296439	0.0251736	0.999545	Amph	13	18948205	19150921	+	4528	protein_coding	amphiphysin [Source:MGI Symbol;Acc:MGI:103574]	-	3624	3316	3754	2932	2740	3943	4106	3305	3777	4627	30.6463	28.2728	31.3239	24.6158	20.0588	32.7686	34.4448	31.5083	29.8543	37.5716
ENSMUSG00000045075	21.0624	22.1058	24.1777	12.106	13.1569	16.8072	38.3247	33.1659	30.2799	34.0048	18.5217	30.5165	-0.723873	0.0251814	0.999545	Gm9796	11	95696894	95699143	-	2250	lincRNA	predicted gene 9796 [Source:MGI Symbol;Acc:MGI:3648412]	-	21	22	24	12	15	17	39	29	32	35	0.357382	0.377486	0.403011	0.202747	0.220988	0.284317	0.658406	0.556384	0.509019	0.571942
ENSMUSG00000021711	1374.07	1427.83	1240.11	1392.19	1341.13	1463.21	1508.42	1452.44	1523.46	1664.29	1355.07	1522.37	-0.168229	0.0253323	0.999545	Trappc13	13	104142149	104178469	-	5166	protein_coding	trafficking protein particle complex 13 [Source:MGI Symbol;Acc:MGI:1914225]	-	1370	1421	1231	1380	1529	1480	1535	1270	1610	1713	10.1546	10.6194	9.0031	10.155	9.811	10.7806	11.2867	10.6123	11.1542	12.1918
ENSMUSG00000066687	364.078	645.086	547.02	351.074	288.575	628.787	607.299	1164.24	358.627	672.324	439.167	686.255	-0.643719	0.0253853	0.999545	Zbtb16	9	48654297	48836222	-	5283	protein_coding	zinc finger and BTB domain containing 16 [Source:MGI Symbol;Acc:MGI:103222]	ZBTB	363	642	543	348	329	636	618	1018	379	692	2.63101	4.69154	3.88336	2.50411	2.06431	4.53016	4.44344	8.31815	2.56759	4.81606
ENSMUSG00000027801	0	1.00481	2.01481	1.00883	12.2798	0	0	1.14365	0	0	3.26165	0.228731	3.57911	0.0254157	0.999545	Tm4sf4	3	57425314	57441677	+	1496	protein_coding	transmembrane 4 superfamily member 4 [Source:MGI Symbol;Acc:MGI:2385173]	-	0	1	2	1	14	0	0	1	0	0	0	0.0258065	0.0505111	0.0254111	0.310211	0	0	0.0288555	0	0
ENSMUSG00000024981	866.567	828.966	760.589	919.047	628.024	859.144	1093.73	941.227	974.634	958.937	800.638	965.534	-0.27083	0.025417	0.999545	Acsl5	19	55251938	55297720	+	4864	protein_coding	acyl-CoA synthetase long-chain family member 5 [Source:MGI Symbol;Acc:MGI:1919129]	-	864	825	755	911	716	869	1113	823	1030	987	6.80169	6.54819	5.86465	7.12001	4.87955	6.723	8.69187	7.30408	7.57897	7.46088
ENSMUSG00000020303	34.101	35.1682	37.2739	32.2827	42.1022	65.2515	29.4806	45.7461	63.3985	65.095	36.1856	53.7943	-0.572194	0.0254627	0.999545	Stc2	11	31357307	31370074	-	5175	protein_coding	stanniocalcin 2 [Source:MGI Symbol;Acc:MGI:1316731]	-	34	35	37	32	48	66	30	40	67	67	0.251574	0.261107	0.270134	0.235069	0.307462	0.479922	0.220203	0.333664	0.463373	0.476026
ENSMUSG00000112571	0	0	0	0	0	0.988659	4.91343	1.14365	1.89249	0.971567	0	1.98196	-3.46472	0.0255057	0.999545	Gm48207	10	105532984	105534493	-	1510	TEC	predicted gene, 48207 [Source:MGI Symbol;Acc:MGI:6097599]	-	0	0	0	0	0	1	5	1	2	1	0	0	0	0	0	0.0249207	0.125778	0.0285879	0.0474045	0.0243495
ENSMUSG00000092021	33.098	19.0913	28.2073	33.2915	27.191	14.8299	18.671	14.8675	25.5486	13.6019	28.1758	17.5038	0.681113	0.02559	0.999545	Gbp11	5	105323042	105346472	-	2692	polymorphic_pseudogene	guanylate binding protein 11 [Source:MGI Symbol;Acc:MGI:3646307]	-	33	19	28	33	31	15	19	13	27	14	0.469392	0.272483	0.392981	0.466009	0.381722	0.209678	0.268096	0.208462	0.358968	0.191214
ENSMUSG00000024667	153.455	151.726	146.073	153.343	185.951	106.775	122.836	148.675	100.302	144.763	158.11	124.67	0.34698	0.0258323	0.999545	Tmem216	19	10533865	10556238	-	1977	protein_coding	transmembrane protein 216 [Source:MGI Symbol;Acc:MGI:1920020]	-	153	151	145	152	212	108	125	130	106	149	2.96334	2.94871	2.77109	2.92276	3.55459	2.05567	2.40168	2.83855	1.91896	2.77106
ENSMUSG00000087177	533.58	569.725	592.353	669.865	751.699	498.284	497.239	546.666	550.715	523.675	623.445	523.316	0.253532	0.0259496	0.999545	E130307A14Rik	10	39621412	39732007	-	7141	antisense	RIKEN cDNA E130307A14 gene [Source:MGI Symbol;Acc:MGI:3036287]	-	532	567	588	664	857	504	506	478	582	539	2.85265	3.06539	3.11105	3.5348	3.97816	2.65588	2.69155	2.88954	2.91696	2.77521
ENSMUSG00000075707	31.0921	46.2211	43.3183	10.0883	2.63139	42.5123	32.4286	30.8786	92.7321	130.19	26.6702	65.7483	-1.30588	0.026145	0.999545	Dio3	12	110279068	110281097	+	2030	protein_coding	deiodinase, iodothyronine type III [Source:MGI Symbol;Acc:MGI:1306782]	-	31	46	43	10	3	43	33	27	98	134	0.584739	0.874829	0.800315	0.187266	0.0489875	0.797094	0.617489	0.574152	1.72781	2.42703
ENSMUSG00000063409	26.0772	12.0577	42.3109	31.2738	39.4708	4.94329	7.86148	26.304	17.9787	18.4598	30.2381	15.1095	1.00992	0.0261509	0.999545	Lrrc43	5	123489305	123508205	+	2066	protein_coding	leucine rich repeat containing 43 [Source:MGI Symbol;Acc:MGI:2685907]	-	26	12	42	31	45	5	8	23	19	19	0.481881	0.224239	0.768082	0.57041	0.722008	0.0910703	0.147086	0.48057	0.329147	0.338135
ENSMUSG00000086212	75.2228	80.3845	71.5256	55.4858	64.9075	87.002	84.5109	94.9232	83.2697	98.1283	69.5053	89.5668	-0.365703	0.0263485	0.999545	Mkln1os	6	31366885	31398773	-	2944	lincRNA	muskelin 1, intracellular mediator containing kelch motifs, opposite strand [Source:MGI Symbol;Acc:MGI:3651306]	-	75	80	71	55	74	88	86	83	88	101	0.975484	1.04909	0.91119	0.7102	0.833209	1.12482	1.10961	1.21703	1.06982	1.26139
ENSMUSG00000039787	228.677	197.947	321.361	404.542	423.653	217.505	155.264	257.322	289.551	146.707	315.236	213.27	0.564663	0.0263628	0.999545	Cercam	2	29869164	29882840	+	3383	protein_coding	cerebral endothelial cell adhesion molecule [Source:MGI Symbol;Acc:MGI:2139134]	-	228	197	319	401	483	220	158	225	306	151	2.58065	2.24815	3.56268	4.50607	4.73266	2.44713	1.77405	2.87105	3.23732	1.64112
ENSMUSG00000032269	105.312	100.481	109.807	95.8391	62.2761	98.8659	142.489	131.52	103.141	193.342	94.743	133.872	-0.500967	0.0263743	0.999545	Htr3a	9	48899213	48911099	-	2083	protein_coding	5-hydroxytryptamine (serotonin) receptor 3A [Source:MGI Symbol;Acc:MGI:96282]	-	105	100	109	95	71	100	145	115	109	199	1.93017	1.85341	1.97709	1.73376	1.12987	1.80654	2.64418	2.38324	1.87285	3.51261
ENSMUSG00000041567	2.00594	1.00481	2.01481	1.00883	3.50851	5.93195	5.89611	4.57461	10.4087	2.9147	1.90858	5.94522	-1.6243	0.0265174	0.999545	Serpina12	12	104028769	104044443	-	3690	protein_coding	serine (or cysteine) peptidase inhibitor, clade A (alpha-1 antiproteinase, antitrypsin), member 12 [Source:MGI Symbol;Acc:MGI:1915304]	-	2	1	2	1	4	6	6	4	11	3	0.0207539	0.0104625	0.0204782	0.0103022	0.035933	0.0611874	0.0617642	0.0467943	0.106692	0.0298924
ENSMUSG00000067578	328.974	402.928	417.065	360.153	613.113	290.666	283.013	412.859	234.669	346.849	424.447	313.611	0.438569	0.0266178	0.999545	Cbln4	2	172036233	172043466	-	2902	protein_coding	cerebellin 4 precursor protein [Source:MGI Symbol;Acc:MGI:2154433]	-	328	401	414	357	699	294	288	361	248	357	4.32786	5.33468	5.39003	4.67656	7.98435	3.8123	3.7697	5.36994	3.05859	4.52311
ENSMUSG00000019880	126.374	130.625	82.607	113.998	92.9756	130.503	137.576	131.52	138.152	166.138	109.316	140.778	-0.36715	0.0267403	0.999545	Rspo3	10	29452416	29535867	-	3090	protein_coding	R-spondin 3 [Source:MGI Symbol;Acc:MGI:1920030]	-	126	130	82	113	106	132	140	115	146	171	1.56138	1.62422	1.00264	1.39019	1.13712	1.60751	1.721	1.60657	1.69107	2.03472
ENSMUSG00000053846	77.2287	84.4038	50.3701	53.4682	27.191	89.9679	94.3378	82.343	63.3985	126.304	58.5324	91.2702	-0.644397	0.0269086	0.999545	Lipg	18	74939322	74961263	-	3787	protein_coding	lipase, endothelial [Source:MGI Symbol;Acc:MGI:1341803]	-	77	84	50	53	31	91	96	72	67	130	0.77856	0.856338	0.498842	0.53203	0.271348	0.904239	0.962914	0.820723	0.633208	1.26216
ENSMUSG00000015812	28.0832	10.0481	18.1333	50.4417	87.7128	11.8639	10.8095	25.1604	22.7099	18.4598	38.8838	17.8007	1.13378	0.027039	0.999545	Gnrh1	14	67745181	67749439	+	642	protein_coding	gonadotropin releasing hormone 1 [Source:MGI Symbol;Acc:MGI:95789]	-	28	10	18	50	100	12	11	22	24	19	1.67001	0.601348	1.05932	2.96067	5.16327	0.703369	0.650833	1.47927	1.33796	1.08814
ENSMUSG00000054934	220.654	223.067	181.333	231.023	143.849	256.063	208.329	306.499	274.411	239.977	199.985	257.056	-0.362779	0.0271329	0.999545	Kcnmb4	10	116417861	116473878	-	3324	protein_coding	potassium large conductance calcium-activated channel, subfamily M, beta member 4 [Source:MGI Symbol;Acc:MGI:1913272]	-	220	222	180	229	164	259	212	268	290	247	2.5343	2.57842	2.04597	2.61897	1.63547	2.93208	2.42263	3.48043	3.12251	2.73214
ENSMUSG00000025789	87.2584	95.4567	124.918	81.7155	157.883	103.809	73.7014	81.1994	43.5273	68.0097	109.446	74.0494	0.567236	0.0273467	0.999545	St8sia2	7	73939119	74013690	-	5384	protein_coding	ST8 alpha-N-acetyl-neuraminide alpha-2,8-sialyltransferase 2 [Source:MGI Symbol;Acc:MGI:106020]	-	87	95	124	81	180	105	75	71	46	70	0.618744	0.681208	0.870172	0.57192	1.10822	0.733874	0.529137	0.569263	0.305787	0.478035
ENSMUSG00000087437	35.104	24.1154	27.1999	25.2208	106.133	41.5237	13.7576	14.8675	17.9787	16.5166	43.5545	20.9288	1.06045	0.0274269	0.999545	Gm13112	4	154864506	154872003	-	1297	antisense	predicted gene 13112 [Source:MGI Symbol;Acc:MGI:3701127]	-	35	24	27	25	121	42	14	13	19	17	1.0333	0.714385	0.786525	0.73275	3.09247	1.21856	0.410015	0.432676	0.5243	0.481921
ENSMUSG00000098900	16.0475	12.0577	15.111	13.1148	7.89416	5.93195	8.84417	5.71827	6.62372	5.8294	12.845	6.5895	0.953589	0.0275228	0.999545	Gm18190	7	7265498	7278267	-	1397	transcribed_unprocessed_pseudogene	predicted gene, 18190 [Source:MGI Symbol;Acc:MGI:5010375]	-	16	12	15	13	9	6	9	5	7	6	0.438551	0.331624	0.40568	0.353755	0.213553	0.161619	0.244713	0.154502	0.179336	0.157914
ENSMUSG00000073490	6.01782	6.02884	1.0074	15.1325	5.26277	0.988659	2.94806	1.14365	1.89249	2.9147	6.68987	1.97751	1.74504	0.0276178	0.999545	Ifi207	1	173723427	173741747	-	3422	protein_coding	interferon activated gene 207 [Source:MGI Symbol;Acc:MGI:2138302]	-	6	6	1	15	6	1	3	1	2	3	0.0671379	0.0676912	0.011041	0.166635	0.0581208	0.0109966	0.0333007	0.0126148	0.0209178	0.0322335
ENSMUSG00000065642	0	1.00481	0	0	0	0.988659	2.94806	3.43096	0	5.8294	0.200961	2.63942	-3.29284	0.0276537	0.999545	Snora69	X	37082912	37083042	-	131	snoRNA	small nucleolar RNA, H/ACA box 69 [Source:MGI Symbol;Acc:MGI:2148180]	-	0	1	0	0	0	1	3	3	0	6	0	0.294707	0	0	0	0.287254	0.869884	0.988575	0	1.68402
ENSMUSG00000052295	3.00891	2.00961	0	3.0265	4.38564	0	0	0	0.946246	0	2.48613	0.189249	3.18025	0.027675	0.999545	8030423F21Rik	5	52607550	52619012	-	2851	lincRNA	RIKEN cDNA 8030423F21 gene [Source:MGI Symbol;Acc:MGI:2443206]	-	3	2	0	3	5	0	0	0	1	0	0.0402922	0.0270828	0	0.0400018	0.0581344	0	0	0	0.0125536	0
ENSMUSG00000076281	902.674	1267.06	519.82	677.936	517.506	307.473	546.373	671.325	489.209	581.969	776.999	519.27	0.581546	0.0277658	0.999545	Gm24270	9	56223715	56223771	-	57	miRNA	predicted gene, 24270 [Source:MGI Symbol;Acc:MGI:5454047]	-	900	1261	516	672	590	311	556	587	517	599	604.594	854.086	342.029	448.177	343.113	205.316	370.52	444.552	324.625	386.383
ENSMUSG00000021732	95.2822	82.3942	157.155	89.7861	83.3272	148.299	106.13	114.365	154.238	208.887	101.589	146.384	-0.529183	0.0279075	0.999545	Fgf10	13	118669791	118792115	+	4601	protein_coding	fibroblast growth factor 10 [Source:MGI Symbol;Acc:MGI:1099809]	-	95	82	156	89	95	150	108	100	163	215	0.79062	0.688054	1.28103	0.735349	0.684434	1.22681	0.891627	0.938226	1.26795	1.71812
ENSMUSG00000040272	115.342	107.514	113.837	128.122	169.286	96.8886	94.3378	110.934	106.926	67.0381	126.82	95.2249	0.417404	0.0279213	0.999545	Accs	2	93833467	93849943	-	8364	protein_coding	1-aminocyclopropane-1-carboxylate synthase (non-functional) [Source:MGI Symbol;Acc:MGI:1919717]	-	115	107	113	127	193	98	96	97	113	69	0.526478	0.493891	0.51045	0.577225	0.764898	0.440909	0.435982	0.50063	0.483538	0.30332
ENSMUSG00000020108	851.522	720.447	1051.73	1275.16	1029.75	602.093	524.754	1124.21	705.9	580.026	985.722	707.397	0.479362	0.0281545	0.999545	Ddit4	10	59949669	59951834	-	1755	protein_coding	DNA-damage-inducible transcript 4 [Source:MGI Symbol;Acc:MGI:1921997]	-	849	717	1044	1264	1174	609	534	983	746	597	18.5237	15.7726	22.4756	27.3795	22.1744	13.058	11.5578	24.1789	15.2135	12.5073
ENSMUSG00000044145	14.0416	12.0577	10.074	14.1237	8.77128	17.7959	16.7056	25.1604	22.7099	16.5166	11.8136	19.7777	-0.744395	0.0281917	0.999545	1810024B03Rik	2	127186355	127208280	-	3550	protein_coding	RIKEN cDNA 1810024B03 gene [Source:MGI Symbol;Acc:MGI:1925560]	-	14	12	10	14	10	18	17	22	24	17	0.151007	0.130501	0.106429	0.149919	0.0933752	0.190801	0.1819	0.267519	0.241963	0.176071
ENSMUSG00000089281	11.0327	9.04326	7.05182	4.03533	9.64841	3.95464	2.94806	4.57461	3.78498	1.94313	8.1623	3.44108	1.25825	0.0282536	0.999545	Scarna6	1	87784556	87784820	+	265	scaRNA	small Cajal body-specific RNA 6 [Source:MGI Symbol;Acc:MGI:3819487]	-	11	9	7	4	11	4	3	4	4	2	1.58944	1.31117	0.998024	0.573812	1.37596	0.568004	0.430018	0.651589	0.540233	0.277492
ENSMUSG00000025475	1437.26	1294.19	1275.37	1344.77	1321.83	1569.99	1446.51	1429.57	1470.47	1480.67	1334.69	1479.44	-0.148761	0.0282735	0.999545	Adgra1	7	139834174	139878088	+	5386	protein_coding	adhesion G protein-coupled receptor A1 [Source:MGI Symbol;Acc:MGI:1277167]	-	1433	1288	1266	1333	1507	1588	1472	1250	1554	1524	10.1877	9.23232	8.88088	9.40848	9.27485	11.0948	10.3813	10.0185	10.3265	10.4036
ENSMUSG00000084839	1.00297	0	1.0074	3.0265	0.877128	0.988659	8.84417	10.2929	2.83874	2.9147	1.1828	5.17583	-2.1245	0.0282817	0.999545	Gm14097	2	132694432	132698523	-	470	antisense	predicted gene 14097 [Source:MGI Symbol;Acc:MGI:3651729]	-	1	0	1	3	1	1	9	9	3	3	0.0814702	0	0.0803879	0.242649	0.0705281	0.0800643	0.727371	0.826617	0.228449	0.234687
ENSMUSG00000111006	19.0564	13.0625	7.05182	12.106	11.4027	3.95464	6.8788	10.2929	3.78498	5.8294	12.5359	6.14814	1.04431	0.0283166	0.999545	Gm10826	10	21030490	21033793	-	3304	TEC	predicted gene 10826 [Source:MGI Symbol;Acc:MGI:3642318]	-	19	13	7	12	13	4	7	9	4	6	0.220196	0.151902	0.0800473	0.138069	0.130426	0.0455572	0.0804766	0.117588	0.0433298	0.0667694
ENSMUSG00000042579	364.078	374.793	377.776	300.632	322.783	447.862	470.706	377.406	357.681	433.319	348.013	417.395	-0.263098	0.0283559	0.999545	4632404H12Rik	3	89767511	89773240	-	5730	lincRNA	RIKEN cDNA 4632404H12 gene [Source:MGI Symbol;Acc:MGI:1921284]	-	363	373	375	298	368	453	479	330	378	446	2.42576	2.51313	2.47266	1.97705	2.12889	2.97496	3.17536	2.4861	2.36104	2.86185
ENSMUSG00000108736	36.1069	26.125	30.2221	26.2297	42.9793	13.8412	22.6018	24.0167	14.1937	28.1754	32.3326	20.5658	0.660385	0.0285903	0.999545	Gm45151	7	116543656	116545755	+	712	lincRNA	predicted gene 45151 [Source:MGI Symbol;Acc:MGI:5753727]	-	36	26	30	26	49	14	23	21	15	29	1.93606	1.40979	1.59195	1.38819	2.28127	0.73992	1.22704	1.27321	0.754011	1.49756
ENSMUSG00000112304	5.01485	0	2.01481	2.01767	3.50851	0.988659	0	0	0	0	2.51117	0.197732	3.19142	0.0286127	0.999545	Gm35206	10	99759506	99830562	+	1642	antisense	predicted gene, 35206 [Source:MGI Symbol;Acc:MGI:5594365]	-	5	0	2	2	4	1	0	0	0	0	0.116599	0	0.0460199	0.0463033	0.0807508	0.0229173	0	0	0	0
ENSMUSG00000114018	1.00297	4.01923	2.01481	1.00883	0	6.92061	4.91343	4.57461	7.56997	2.9147	1.60917	5.37866	-1.76851	0.0287531	0.999545	Gm36495	12	16844881	16850881	-	684	lincRNA	predicted gene, 36495 [Source:MGI Symbol;Acc:MGI:5595654]	-	1	4	2	1	0	7	5	4	8	3	0.055981	0.225769	0.110475	0.0555776	0	0.385105	0.277668	0.252443	0.418601	0.161262
ENSMUSG00000096929	1332.95	1589.6	1540.32	1413.38	1808.64	1455.31	1211.65	1304.91	1112.79	1378.65	1536.98	1292.66	0.250118	0.0287574	0.999545	A330023F24Rik	1	194976375	195037904	+	9354	processed_transcript	RIKEN cDNA A330023F24 gene [Source:MGI Symbol;Acc:MGI:2443958]	-	1329	1582	1529	1401	2062	1472	1233	1141	1176	1419	5.44032	6.52936	6.17588	5.69372	7.30721	5.92171	5.007	5.2656	4.49963	5.57765
ENSMUSG00000056412	11.0327	4.01923	2.01481	6.053	1.75426	5.93195	12.7749	19.4421	14.1937	7.77254	4.97479	12.023	-1.27725	0.0288044	0.999545	Gm12396	4	40775259	40775564	-	306	processed_pseudogene	predicted gene 12396 [Source:MGI Symbol;Acc:MGI:3649201]	-	11	4	2	6	2	6	13	17	15	8	1.37647	0.504661	0.246943	0.745393	0.216655	0.737848	1.61374	2.39821	1.75443	0.961247
ENSMUSG00000050296	7.02079	8.03845	12.0888	2.01767	2.63139	4.94329	0.982685	1.14365	0.946246	0.971567	6.35943	1.79749	1.8141	0.0288073	0.999545	Abca12	1	71242276	71414910	-	14808	protein_coding	ATP-binding cassette, sub-family A (ABC1), member 12 [Source:MGI Symbol;Acc:MGI:2676312]	-	7	8	12	2	3	5	1	1	1	1	0.0181008	0.0208571	0.0306178	0.00513439	0.0067156	0.0127061	0.00256516	0.00291516	0.00241696	0.00248296
ENSMUSG00000028944	1306.87	1437.88	1571.55	1461.8	1162.2	1540.33	1518.25	1596.54	1622.81	2152.02	1388.06	1685.99	-0.280846	0.0288903	0.999545	Prkag2	5	24862744	25100642	-	6480	protein_coding	protein kinase, AMP-activated, gamma 2 non-catalytic subunit [Source:MGI Symbol;Acc:MGI:1336153]	-	1303	1431	1560	1449	1325	1558	1545	1396	1715	2215	7.69956	8.52562	9.09574	8.50059	6.77799	9.04752	9.0566	9.29972	9.47231	12.568
ENSMUSG00000103010	0	5.02403	0	4.03533	7.01703	0	0.982685	0	0	0	3.21528	0.196537	3.55024	0.0291385	0.999545	Gm37504	14	52373153	52375526	-	2374	TEC	predicted gene, 37504 [Source:MGI Symbol;Acc:MGI:5610732]	-	0	5	0	4	8	0	1	0	0	0	0	0.0813112	0	0.0640523	0.111704	0	0.0160004	0	0	0
ENSMUSG00000082512	1.00297	2.00961	3.02221	2.01767	2.63139	0	0.982685	0	0	0	2.13677	0.196537	2.95758	0.0291572	0.999545	Gm13937	2	110209178	110210165	-	988	processed_pseudogene	predicted gene 13937 [Source:MGI Symbol;Acc:MGI:3651879]	-	1	2	3	2	3	0	1	0	0	0	0.0387561	0.0781509	0.114724	0.0769535	0.100652	0	0.0384463	0	0	0
ENSMUSG00000021260	381.129	371.779	352.591	447.922	417.513	333.178	337.061	355.676	350.111	313.816	394.187	337.968	0.222933	0.0293054	0.999545	Hhipl1	12	108306270	108330869	+	5601	protein_coding	hedgehog interacting protein-like 1 [Source:MGI Symbol;Acc:MGI:1919265]	-	380	370	350	444	476	337	343	311	370	323	2.59785	2.55034	2.36097	3.01351	2.81709	2.26413	2.32616	2.39692	2.3643	2.12033
ENSMUSG00000098047	2.00594	0	0	0	0	0.988659	5.89611	4.57461	6.62372	0	0.401188	3.61662	-3.17324	0.0293371	0.999545	Gm18822	3	8615275	8616504	-	1025	processed_pseudogene	predicted gene, 18822 [Source:MGI Symbol;Acc:MGI:5011007]	-	2	0	0	0	0	1	6	4	7	0	0.0747141	0	0	0	0	0.0367124	0.222351	0.16846	0.244422	0
ENSMUSG00000024042	319.948	250.197	317.332	477.178	431.547	230.357	223.07	300.781	329.294	261.352	359.24	268.971	0.418193	0.0294796	0.999545	Sik1	17	31844248	31855792	-	4511	protein_coding	salt inducible kinase 1 [Source:MGI Symbol;Acc:MGI:104754]	-	319	249	315	473	492	233	227	263	348	269	2.70779	2.13102	2.63831	3.98606	3.61537	1.94366	1.91146	2.51676	2.76104	2.19253
ENSMUSG00000092009	30.0891	19.0913	21.1555	37.3268	16.6654	42.5123	41.2728	26.304	37.8498	42.749	24.8656	38.1376	-0.625937	0.0294806	0.999545	Myh15	16	49057486	49199104	+	6340	protein_coding	myosin, heavy chain 15 [Source:MGI Symbol;Acc:MGI:3643515]	-	30	19	21	37	19	43	42	23	40	44	0.181188	0.115698	0.125146	0.221854	0.0993401	0.255221	0.251635	0.156602	0.225807	0.25517
ENSMUSG00000045795	467.384	440.105	527.879	722.324	612.236	425.123	442.208	472.329	477.854	404.172	553.986	444.337	0.318641	0.0295741	0.999545	Whamm	7	81571266	81596836	+	3176	protein_coding	WAS protein homolog associated with actin, golgi membranes and microtubules [Source:MGI Symbol;Acc:MGI:2142282]	-	466	438	524	716	698	430	450	413	505	416	5.61826	5.32421	6.23361	8.57014	7.28509	5.09477	5.382	5.61344	5.69085	4.81592
ENSMUSG00000044867	2.00594	2.00961	2.01481	4.03533	0.877128	0	0	0	0	0.971567	2.18856	0.194313	2.98214	0.0296	0.999545	Gimap1os	6	48738346	48741444	-	3099	processed_transcript	GTPase, IMAP family member 1, opposite strand [Source:MGI Symbol;Acc:MGI:3781523]	-	2	2	2	4	1	0	0	0	0	1	0.0247118	0.0249155	0.0243836	0.0490675	0.0106964	0	0	0	0	0.0118644
ENSMUSG00000028949	1180.5	1135.43	1103.11	1155.11	1207.81	1096.42	1075.06	1049.87	990.72	1002.66	1156.39	1042.95	0.149403	0.0297021	0.999545	Smarcd3	5	24590818	24624411	-	5120	protein_coding	SWI/SNF related, matrix associated, actin dependent regulator of chromatin, subfamily d, member 3 [Source:MGI Symbol;Acc:MGI:1914243]	-	1177	1130	1095	1145	1377	1109	1094	918	1047	1032	8.80244	8.52059	8.0804	8.50141	8.91506	8.15077	8.11632	7.73984	7.31886	7.41099
ENSMUSG00000025450	51.1515	41.1971	57.422	86.7596	64.9075	39.5464	39.3074	44.6025	47.3123	41.7774	60.2875	42.5092	0.505032	0.0297446	0.999545	Gm9752	13	119473804	119476761	-	2659	processed_transcript	predicted gene 9752 [Source:MGI Symbol;Acc:MGI:3641896]	-	51	41	57	86	74	40	40	39	50	43	0.734426	0.595287	0.809926	1.22952	0.922515	0.566081	0.571417	0.633149	0.673005	0.594589
ENSMUSG00000006270	21.0624	23.1106	29.2147	31.2738	101.747	15.8185	19.6537	40.0279	12.3012	7.77254	41.2817	19.1148	1.1238	0.0297524	0.999545	Vax1	19	59166187	59170056	-	1117	protein_coding	ventral anterior homeobox 1 [Source:MGI Symbol;Acc:MGI:1277163]	Homeobox	21	23	29	31	116	16	20	35	13	8	0.719884	0.794943	0.98092	1.05503	3.44243	0.539019	0.680125	1.35262	0.41654	0.263332
ENSMUSG00000048038	907.688	709.394	678.989	520.558	835.026	625.821	566.027	430.014	703.061	450.807	730.331	555.146	0.395326	0.029761	0.999545	Ccdc187	2	26243469	26294557	-	9827	protein_coding	coiled-coil domain containing 187 [Source:MGI Symbol;Acc:MGI:3045295]	-	905	706	674	516	952	633	576	376	743	464	3.52634	2.77361	2.59136	1.99611	3.21126	2.42393	2.22645	1.65168	2.70604	1.73606
ENSMUSG00000085059	13.0386	20.0961	3.02221	11.0972	19.2968	4.94329	9.82685	5.71827	2.83874	5.8294	13.3102	5.83131	1.19668	0.0298326	0.999545	Gm11750	11	118791372	118793828	+	583	lincRNA	predicted gene 11750 [Source:MGI Symbol;Acc:MGI:3650640]	-	13	20	3	11	22	5	10	5	3	6	0.85383	1.32441	0.19442	0.717265	1.25088	0.322729	0.651543	0.370221	0.18417	0.378398
ENSMUSG00000042474	0	0	0	0	0.877128	0.988659	2.94806	0	2.83874	5.8294	0.175426	2.52097	-3.2414	0.0298806	0.999545	Fcmr	1	130865669	130880791	+	1736	protein_coding	Fc fragment of IgM receptor [Source:MGI Symbol;Acc:MGI:1916419]	-	0	0	0	0	1	1	3	0	3	6	0	0	0	0	0.0190946	0.0216764	0.0656422	0	0.0618498	0.127077
ENSMUSG00000022206	152.452	110.529	195.436	123.078	93.8527	171.038	164.108	188.703	171.271	213.745	135.069	181.773	-0.430018	0.0300064	0.999545	Npr3	15	11839896	11907287	-	9389	protein_coding	natriuretic peptide receptor 3 [Source:MGI Symbol;Acc:MGI:97373]	-	152	110	194	122	107	173	167	165	181	220	0.619899	0.452308	0.780676	0.493965	0.377767	0.693368	0.67563	0.75862	0.689963	0.861529
ENSMUSG00000057465	1.00297	2.00961	2.01481	5.04417	11.4027	0.988659	0.982685	0	0	1.94313	4.29485	0.782896	2.44736	0.0300271	0.999545	Saa2	7	46751790	46754313	+	2518	protein_coding	serum amyloid A 2 [Source:MGI Symbol;Acc:MGI:98222]	-	1	2	2	5	13	1	1	0	0	2	0.0152069	0.0306645	0.0300098	0.0754866	0.171138	0.0149445	0.0150854	0	0	0.0292039
ENSMUSG00000107355	19.0564	26.125	25.1851	12.106	42.9793	16.8072	17.6883	9.14923	13.2474	13.6019	25.0904	14.0988	0.832945	0.030056	0.999545	AI839979	5	31569595	31571397	-	1539	lincRNA	expressed sequence AI839979 [Source:MGI Symbol;Acc:MGI:2140975]	-	19	26	25	12	49	17	18	8	14	14	0.472728	0.652223	0.613748	0.296414	1.0554	0.415669	0.444268	0.224394	0.325579	0.334469
ENSMUSG00000021025	423.254	380.822	468.442	1087.52	701.703	270.892	257.464	635.871	426.757	329.361	612.349	384.069	0.673703	0.0300605	0.999545	Nfkbia	12	55489410	55492647	-	1610	protein_coding	nuclear factor of kappa light polypeptide gene enhancer in B cells inhibitor, alpha [Source:MGI Symbol;Acc:MGI:104741]	-	422	379	465	1078	800	274	262	556	451	339	10.0365	9.08813	10.9123	25.4536	16.4712	6.40415	6.1814	14.9076	10.0258	7.74177
ENSMUSG00000044626	26.0772	15.0721	16.1184	14.1237	15.7883	9.88659	15.723	2.28731	5.67748	10.6872	17.436	8.85231	0.964782	0.0301903	0.999545	Liph	16	21953817	21995663	-	4402	protein_coding	lipase, member H [Source:MGI Symbol;Acc:MGI:2388029]	-	26	15	16	14	18	10	16	2	6	11	0.226162	0.131553	0.137328	0.120902	0.135545	0.0854844	0.138064	0.0196128	0.0487829	0.0918775
ENSMUSG00000037217	10015.7	9466.29	9138.15	9991.48	6755.64	10446.2	11403.1	10167.1	10164.6	12438	9073.45	10923.8	-0.267822	0.0302497	0.999545	Syn1	X	20860511	20921004	-	3299	protein_coding	synapsin I [Source:MGI Symbol;Acc:MGI:98460]	-	9986	9421	9071	9904	7702	10566	11604	8890	10742	12802	115.906	110.249	103.887	114.126	77.3894	120.522	133.609	116.327	116.539	142.68
ENSMUSG00000026572	0	2.00961	3.02221	6.053	10.5255	0	1.96537	1.14365	0	0	4.32207	0.621805	2.83552	0.0303174	0.999545	Tbx19	1	165137855	165160773	-	3192	protein_coding	T-box 19 [Source:MGI Symbol;Acc:MGI:1891158]	T-box	0	2	3	6	12	0	2	1	0	0	0	0.0241896	0.0355097	0.0714569	0.124617	0	0.0238001	0.0135237	0	0
ENSMUSG00000110605	52.1545	39.1875	22.1629	34.3003	34.208	56.3535	62.8919	40.0279	41.6348	70.9244	36.4026	54.3665	-0.581494	0.0304262	0.999545	Gm32856	8	129263641	129282844	+	4824	lincRNA	predicted gene, 32856 [Source:MGI Symbol;Acc:MGI:5592015]	-	52	39	22	34	39	57	64	35	44	73	0.412755	0.312118	0.172307	0.267934	0.267989	0.444636	0.503946	0.313199	0.326446	0.556394
ENSMUSG00000039356	268.796	279.336	321.361	345.021	387.691	261.995	242.723	277.908	281.035	259.408	320.441	264.614	0.277713	0.0304822	0.999545	Exosc2	2	31670715	31681349	+	2888	protein_coding	exosome component 2 [Source:MGI Symbol;Acc:MGI:2385133]	-	268	278	319	342	442	265	247	243	297	267	3.55332	3.71628	4.17332	4.50178	5.07324	3.45291	3.24871	3.63219	3.68066	3.39923
ENSMUSG00000022911	271.805	264.264	266.962	260.279	183.32	201.686	217.173	195.565	219.529	169.053	249.326	200.601	0.311749	0.0305528	0.999545	Arl13b	16	62793685	62847040	-	5087	protein_coding	ADP-ribosylation factor-like 13B [Source:MGI Symbol;Acc:MGI:1915396]	-	271	263	265	258	209	204	221	171	232	174	2.03988	1.99598	1.96822	1.92803	1.3619	1.50906	1.65022	1.45109	1.63227	1.25763
ENSMUSG00000052981	3081.13	3128.97	3055.45	3139.49	2412.98	3308.05	3321.48	3782.06	3119.77	3787.17	2963.6	3463.71	-0.225034	0.0306992	0.999545	Ube2ql1	13	69702832	69739889	-	2674	protein_coding	ubiquitin-conjugating enzyme E2Q family-like 1 [Source:MGI Symbol;Acc:MGI:1924230]	-	3072	3114	3033	3112	2751	3346	3380	3307	3297	3898	43.9902	44.9592	42.8548	44.2419	34.1027	47.0871	48.0139	53.3866	44.129	53.5978
ENSMUSG00000089984	11.0327	6.02884	16.1184	10.0883	7.89416	2.96598	4.91343	8.00557	4.73123	2.9147	10.2325	4.70618	1.13448	0.0307854	0.999545	Fbxo24	5	137612503	137629002	-	2512	protein_coding	F-box protein 24 [Source:MGI Symbol;Acc:MGI:1918426]	-	11	6	16	10	9	3	5	7	5	3	0.167675	0.0922131	0.240652	0.151334	0.118763	0.0449406	0.075607	0.120292	0.0712389	0.0439105
ENSMUSG00000006469	9.02674	11.0529	20.1481	11.0972	12.2798	12.8526	2.94806	2.28731	6.62372	3.88627	12.7209	5.71958	1.14152	0.0308789	0.999545	Slc34a3	2	25228898	25234364	-	2358	protein_coding	solute carrier family 34 (sodium phosphate), member 3 [Source:MGI Symbol;Acc:MGI:2159410]	-	9	11	20	11	14	13	3	2	7	4	0.146149	0.180098	0.320461	0.177339	0.196809	0.207461	0.0483269	0.0366139	0.106248	0.062371
ENSMUSG00000024505	58.1723	49.2355	51.3775	40.3533	39.4708	47.4556	73.7014	60.6136	78.5384	66.0666	47.7219	65.2751	-0.456017	0.0309172	0.999545	Dtwd2	18	49696145	49755601	-	3520	protein_coding	DTW domain containing 2 [Source:MGI Symbol;Acc:MGI:1916107]	-	58	49	51	40	45	48	75	53	83	68	0.630931	0.537421	0.547414	0.431989	0.42377	0.51314	0.809338	0.649969	0.843921	0.710285
ENSMUSG00000027306	68.202	74.3557	89.6589	91.8038	109.641	55.3649	80.5802	65.1882	45.4198	70.9244	86.7323	63.4955	0.45316	0.0309326	0.999545	Nusap1	2	119618298	119651244	+	4059	protein_coding	nucleolar and spindle associated protein 1 [Source:MGI Symbol;Acc:MGI:2675669]	-	68	74	89	91	125	56	82	57	48	73	0.641485	0.70384	0.828437	0.852271	1.02082	0.519166	0.767373	0.606199	0.423242	0.661257
ENSMUSG00000114354	0	2.00961	0	0	1.75426	0.988659	4.91343	8.00557	1.89249	4.85784	0.752774	4.1316	-2.41123	0.0309737	0.999545	Gm34961	13	59823266	59833236	+	727	lincRNA	predicted gene, 34961 [Source:MGI Symbol;Acc:MGI:5594120]	-	0	2	0	0	2	1	5	7	2	5	0	0.106208	0	0	0.0911918	0.051761	0.261245	0.415646	0.0984605	0.252873
ENSMUSG00000091060	0	0	0	2.01767	1.75426	0	5.89611	4.57461	6.62372	4.85784	0.754385	4.39046	-2.51255	0.031027	0.999545	Myocos	1	162647193	162658219	-	969	protein_coding	myocilin opposite strand [Source:MGI Symbol;Acc:MGI:3642786]	-	0	0	0	2	2	0	6	4	7	5	0	0	0	0.0784624	0.0684174	0	0.235201	0.178195	0.258548	0.18972
ENSMUSG00000068200	1.00297	1.00481	0	0	0	1.97732	2.94806	2.28731	1.89249	3.88627	0.401556	2.59829	-2.69861	0.0310397	0.999545	Gm5931	X	10660522	10660998	+	477	processed_pseudogene	predicted pseudogene 5931 [Source:MGI Symbol;Acc:MGI:3647036]	-	1	1	0	0	0	2	3	2	2	4	0.0802746	0.0809362	0	0	0	0.157779	0.238899	0.180997	0.150065	0.308325
ENSMUSG00000116802	68.202	79.3797	48.3553	64.5653	45.6107	77.1154	81.5629	66.3319	87.0546	105.901	61.2226	83.5931	-0.454622	0.0310643	0.999545	AC129328.1	17	17234872	17266063	+	2322	lincRNA	novel transcript	-	68	79	48	64	52	78	83	58	92	109	1.12136	1.31349	0.78103	1.04779	0.742337	1.26406	1.35777	1.07826	1.41805	1.72596
ENSMUSG00000030254	86.2555	115.553	92.6811	63.5565	94.7299	104.798	135.611	100.641	115.442	140.877	90.5551	119.474	-0.400872	0.0311538	0.999545	Rad18	6	112619850	112696686	-	5796	protein_coding	RAD18 E3 ubiquitin protein ligase [Source:MGI Symbol;Acc:MGI:1890476]	-	86	115	92	63	108	106	138	88	122	145	0.568155	0.766003	0.599719	0.413207	0.617668	0.6882	0.904404	0.655411	0.753352	0.919827
ENSMUSG00000047867	58.1723	56.2692	92.6811	94.8303	75.4331	40.535	39.3074	64.0446	59.6135	62.1803	75.4772	53.1362	0.508103	0.0312382	0.999545	Gimap6	6	48701582	48708225	-	3496	protein_coding	GTPase, IMAP family member 6 [Source:MGI Symbol;Acc:MGI:1918876]	-	58	56	92	94	86	41	40	56	63	64	0.635262	0.618412	0.994272	1.02214	0.815431	0.441316	0.43461	0.691474	0.644964	0.673093
ENSMUSG00000082292	5.01485	12.0577	3.02221	4.03533	14.9112	2.96598	1.96537	4.57461	2.83874	1.94313	7.80825	2.85757	1.47454	0.0312783	0.999545	Gm12250	11	58187739	58189012	+	1274	processed_pseudogene	predicted gene 12250 [Source:MGI Symbol;Acc:MGI:3649299]	-	5	12	3	4	17	3	2	4	3	2	0.150279	0.363641	0.0889694	0.119357	0.442323	0.0886112	0.059631	0.135535	0.0842788	0.0577201
ENSMUSG00000064380	2.00594	4.01923	0	2.01767	7.89416	0.988659	0	0	0.946246	0	3.1874	0.386981	2.96694	0.0313427	0.999545	Gm26448	9	120129351	120129553	+	203	snoRNA	predicted gene, 26448 [Source:MGI Symbol;Acc:MGI:5456225]	-	2	4	0	2	9	1	0	0	1	0	0.377251	0.760721	0	0.374533	1.46962	0.185371	0	0	0.176307	0
ENSMUSG00000001065	467.384	475.274	564.146	539.726	553.468	408.316	404.866	492.915	485.424	426.518	519.999	443.608	0.230199	0.0313764	0.999545	Zfp276	8	123254195	123269745	+	5530	protein_coding	zinc finger protein (C2H2 type) 276 [Source:MGI Symbol;Acc:MGI:1888495]	zf-C2H2	466	473	560	535	631	413	412	431	513	439	3.22669	3.30215	3.82606	3.67777	3.78237	2.81036	2.82998	3.36443	3.32016	2.91881
ENSMUSG00000056310	352.043	379.817	356.621	414.63	358.746	293.632	299.719	341.952	320.777	346.849	372.371	320.586	0.216343	0.0314364	0.999545	Tyw1	5	130255619	130341563	+	7388	protein_coding	tRNA-yW synthesizing protein 1 homolog (S. cerevisiae) [Source:MGI Symbol;Acc:MGI:2141161]	-	351	378	354	411	409	297	305	299	339	357	1.81918	1.97527	1.81036	2.11481	1.83509	1.51275	1.56814	1.74704	1.64225	1.77667
ENSMUSG00000063804	278.826	377.807	245.806	347.039	435.056	315.382	259.429	232.162	262.11	238.034	336.907	261.423	0.36641	0.0315379	0.999545	Lin28b	10	45376620	45486395	-	9065	protein_coding	lin-28 homolog B (C. elegans) [Source:MGI Symbol;Acc:MGI:3584032]	CSD	278	376	244	344	496	319	264	203	277	245	1.17428	1.60133	1.01698	1.4426	1.81374	1.32422	1.10624	0.966691	1.09365	0.993722
ENSMUSG00000078877	164.487	251.202	227.673	202.775	211.388	219.482	353.767	217.294	281.981	292.442	211.505	272.993	-0.369269	0.031546	0.999545	Gm14295	2	176798612	176811223	+	3527	protein_coding	predicted gene 14295 [Source:MGI Symbol;Acc:MGI:3709624]	zf-C2H2	164	250	226	201	241	222	360	190	298	301	1.78047	2.7365	2.42098	2.16644	2.26502	2.36856	3.87711	2.32545	3.02397	3.13782
ENSMUSG00000044694	24.0713	25.1202	19.1407	8.07066	16.6654	25.7051	29.4806	19.4421	43.5273	36.9195	18.6136	31.0149	-0.743033	0.0315969	0.999545	2010007H06Rik	9	51278513	51284210	+	4934	antisense	RIKEN cDNA 2010007H06 gene [Source:MGI Symbol;Acc:MGI:1917099]	-	24	25	19	8	19	26	30	17	46	38	0.186255	0.195615	0.145493	0.0616377	0.127648	0.198295	0.230958	0.148734	0.333676	0.283172
ENSMUSG00000082160	0	6.02884	1.0074	0	2.63139	6.92061	4.91343	4.57461	10.4087	5.8294	1.93353	6.52935	-1.75265	0.0318025	0.999545	Gm11578	1	60592251	60592709	-	459	processed_pseudogene	predicted gene 11578 [Source:MGI Symbol;Acc:MGI:3650505]	-	0	6	1	0	3	7	5	4	11	6	0	0.504661	0.0823144	0	0.216655	0.573882	0.413779	0.37619	0.857722	0.480624
ENSMUSG00000006567	67.199	64.3076	89.6589	112.989	131.569	90.9566	59.9438	67.4755	53.936	42.749	93.1448	63.0122	0.567025	0.0320167	0.999545	Atp7b	8	21992785	22060305	-	6505	protein_coding	ATPase, Cu++ transporting, beta polypeptide [Source:MGI Symbol;Acc:MGI:103297]	-	67	64	89	112	150	92	61	59	57	44	0.394388	0.379834	0.51693	0.654525	0.764371	0.532203	0.3562	0.391529	0.313613	0.248698
ENSMUSG00000095588	8.02377	4.01923	6.04442	7.06183	7.01703	7.90927	13.7576	26.304	10.4087	8.7441	6.43325	13.4247	-1.04556	0.0320365	0.999545	Gm12350	4	34485832	34486293	+	462	processed_pseudogene	predicted gene 12350 [Source:MGI Symbol;Acc:MGI:3649478]	-	8	4	6	7	8	8	14	23	11	9	0.663047	0.334256	0.490679	0.575986	0.573995	0.651606	1.15106	2.14904	0.852152	0.716254
ENSMUSG00000045464	92.2733	67.3221	78.5774	67.5918	71.0474	57.3422	47.1689	67.4755	62.4522	52.4646	75.3624	57.3807	0.395489	0.0320836	0.999545	2810002D19Rik	2	94406151	94411682	+	2040	processed_transcript	RIKEN cDNA 2810002D19 gene [Source:MGI Symbol;Acc:MGI:1913707]	-	92	67	78	67	81	58	48	59	66	54	1.72685	1.26796	1.44462	1.24853	1.31618	1.06988	0.893764	1.24848	1.15792	0.973263
ENSMUSG00000048939	275.817	271.298	293.154	395.463	322.783	261.995	259.429	266.471	237.508	261.352	311.703	257.351	0.277057	0.0321397	0.999545	Atp13a5	16	29231851	29378732	-	4661	protein_coding	ATPase type 13A5 [Source:MGI Symbol;Acc:MGI:2444068]	-	275	270	291	392	368	265	264	233	251	269	2.25918	2.23638	2.35886	3.19715	2.61715	2.13946	2.15148	2.15792	1.92735	2.12197
ENSMUSG00000100552	2.00594	0	2.01481	7.06183	1.75426	0	0	0	0.946246	0	2.56737	0.189249	3.21693	0.0322296	0.999545	Gm29019	15	82982725	82987830	-	564	lincRNA	predicted gene 29019 [Source:MGI Symbol;Acc:MGI:5579725]	-	2	0	2	7	2	0	0	0	1	0	0.135784	0	0.13398	0.471818	0.117547	0	0	0	0.0634582	0
ENSMUSG00000110824	69.205	61.2932	31.2295	42.371	52.6277	40.535	35.3767	20.5858	38.7961	34.9764	51.3453	34.054	0.586967	0.032307	0.999545	Gm48677	9	75317072	75342842	-	614	antisense	predicted gene, 48677 [Source:MGI Symbol;Acc:MGI:6098297]	-	69	61	31	42	60	41	36	18	41	36	4.30306	3.83551	1.90758	2.60038	3.23924	2.51277	2.22713	1.2655	2.38991	2.15576
ENSMUSG00000024658	10.0297	5.02403	11.0814	12.106	16.6654	5.93195	0.982685	2.28731	6.62372	7.77254	10.9813	4.71964	1.21021	0.0323111	0.999545	Gm9750	19	9135157	9279175	+	2017	processed_transcript	predicted gene 9750 [Source:MGI Symbol;Acc:MGI:3642669]	-	10	5	11	12	19	6	1	2	7	8	0.189841	0.0957029	0.206051	0.226168	0.312254	0.111939	0.0188324	0.0428039	0.124211	0.145831
ENSMUSG00000089718	14.0416	26.125	18.1333	19.1678	5.26277	4.94329	15.723	3.43096	5.67748	7.77254	16.5461	7.50945	1.12643	0.0323242	0.999545	2310075C17Rik	9	112227579	112228242	+	326	lincRNA	RIKEN cDNA 2310075C17 gene [Source:MGI Symbol;Acc:MGI:1917444]	-	14	26	18	19	6	5	16	3	6	8	1.6444	3.07905	2.08614	2.2156	0.61009	0.577151	1.86429	0.397249	0.658719	0.902275
ENSMUSG00000110080	470.393	524.509	655.819	680.962	745.559	516.08	410.762	488.34	557.339	500.357	615.449	494.576	0.315774	0.0323282	0.999545	Gm6145	14	105621015	105643725	-	5671	processed_transcript	predicted gene 6145 [Source:MGI Symbol;Acc:MGI:3779559]	-	469	522	651	675	850	522	418	427	589	515	3.16672	3.55363	4.33721	4.5248	4.96843	3.46376	2.79981	3.25033	3.71725	3.33898
ENSMUSG00000052479	64.1901	55.2644	89.6589	65.5741	87.7128	127.537	99.2512	88.0613	75.6997	101.043	72.4801	98.3184	-0.438202	0.0323309	0.999545	A330008L17Rik	8	99416642	99733438	+	5730	lincRNA	RIKEN cDNA A330008L17 gene [Source:MGI Symbol;Acc:MGI:2443215]	-	64	55	89	65	100	129	101	77	80	104	0.427683	0.370569	0.586846	0.431235	0.578503	0.847173	0.669543	0.58009	0.499692	0.667337
ENSMUSG00000105890	4.01188	2.00961	4.02961	0	0.877128	0	0	0	0	0	2.18565	0	3.56076	0.0323553	0.999545	Gm42780	5	111028552	111029285	+	734	TEC	predicted gene 42780 [Source:MGI Symbol;Acc:MGI:5662917]	-	4	2	4	0	1	0	0	0	0	0	0.20867	0.105195	0.205898	0	0.045161	0	0	0	0	0
ENSMUSG00000071665	22.0654	32.1538	31.2295	37.3268	85.0815	24.7165	22.6018	26.304	24.6024	24.2892	41.5714	24.5028	0.769832	0.0325002	0.999545	Foxr2	X	153118786	153132861	+	3213	protein_coding	forkhead box R2 [Source:MGI Symbol;Acc:MGI:3511682]	Fork	22	32	31	37	97	25	23	23	26	25	0.262185	0.384504	0.364535	0.437771	1.00074	0.292797	0.271912	0.309013	0.28962	0.286085
ENSMUSG00000096361	2.00594	3.01442	0	0	2.63139	2.96598	5.89611	12.5802	1.89249	5.8294	1.53035	5.83283	-1.89998	0.0325949	0.999545	Gm5814	17	47410363	47410737	+	375	processed_pseudogene	predicted pseudogene 5814 [Source:MGI Symbol;Acc:MGI:3648910]	-	2	3	0	0	3	3	6	11	2	6	0.204219	0.308853	0	0	0.265186	0.301042	0.607759	1.26625	0.190882	0.588283
ENSMUSG00000056735	41.1218	28.1346	36.2665	54.477	28.9452	45.4783	42.2555	51.4644	70.0222	66.0666	37.789	55.0574	-0.547591	0.0326132	0.999545	A930024E05Rik	5	122989354	122998345	+	1896	antisense	RIKEN cDNA A930024E05 gene [Source:MGI Symbol;Acc:MGI:1924414]	-	41	28	36	54	33	46	43	45	74	68	0.828022	0.570139	0.717386	1.08271	0.576947	0.91297	0.861473	1.02455	1.39688	1.31867
ENSMUSG00000001496	133.395	99.4759	99.7329	98.8656	390.322	99.8545	69.7706	155.537	72.861	54.4078	164.358	90.4862	0.864718	0.0327506	0.999545	Nkx2-1	12	56531958	56536908	-	2842	protein_coding	NK2 homeobox 1 [Source:MGI Symbol;Acc:MGI:108067]	Homeobox	133	99	99	98	445	101	71	136	77	56	1.79194	1.34485	1.31613	1.31086	5.19034	1.33732	0.948956	2.06573	0.969691	0.724487
ENSMUSG00000033961	293.87	288.38	325.391	319.8	370.148	297.586	243.706	272.19	261.164	278.84	319.518	270.697	0.240614	0.0328024	0.999545	Zfp446	7	12977848	12985714	+	7175	protein_coding	zinc finger protein 446 [Source:MGI Symbol;Acc:MGI:2442185]	zf-C2H2	293	287	323	317	422	301	248	238	276	287	1.56366	1.54426	1.70086	1.67955	1.94962	1.57863	1.31293	1.43191	1.37675	1.47071
ENSMUSG00000032807	74.2198	90.4326	63.4664	100.883	20.174	56.3535	140.524	108.647	116.388	183.626	69.8352	121.108	-0.796867	0.03293	0.999545	Alox12b	11	69156989	69169792	+	2431	protein_coding	arachidonate 12-lipoxygenase, 12R type [Source:MGI Symbol;Acc:MGI:1274782]	-	74	90	63	100	23	57	143	95	123	189	1.16558	1.42928	0.979139	1.56376	0.313619	0.882322	2.23441	1.68693	1.81087	2.85853
ENSMUSG00000032902	762.258	777.721	842.189	749.563	698.194	753.358	660.364	561.534	655.749	666.495	765.985	659.5	0.214778	0.0329786	0.999545	Slc16a1	3	104638668	104658462	+	4426	protein_coding	solute carrier family 16 (monocarboxylic acid transporters), member 1 [Source:MGI Symbol;Acc:MGI:106013]	-	760	774	836	743	796	762	672	491	693	686	6.57504	6.75135	7.13647	6.38165	5.96158	6.47859	5.76726	4.78883	5.60387	5.69875
ENSMUSG00000061898	289.859	308.476	308.265	334.933	353.483	261.995	279.083	263.04	242.239	308.958	319.003	271.063	0.235634	0.0329818	0.999545	Rbak	5	143172186	143180775	-	4143	protein_coding	RB-associated KRAB zinc finger [Source:MGI Symbol;Acc:MGI:1927369]	zf-C2H2	289	307	306	332	403	265	284	230	256	318	2.67103	2.86078	2.79058	3.04634	3.22441	2.40695	2.60384	2.39647	2.21152	2.82214
ENSMUSG00000039814	0	1.00481	0	1.00883	3.50851	1.97732	4.91343	8.00557	2.83874	5.8294	1.10443	4.71289	-2.03251	0.0330107	0.999545	Xkr5	8	18932729	18950975	-	4141	protein_coding	X-linked Kx blood group related 5 [Source:MGI Symbol;Acc:MGI:2442327]	-	0	1	0	1	4	2	5	7	3	6	0	0.00932301	0	0.00918016	0.0320195	0.0181745	0.0458645	0.0729713	0.0259288	0.0532737
ENSMUSG00000007682	633.877	647.096	541.983	672.892	272.787	591.218	920.776	876.038	661.426	810.287	553.727	771.949	-0.479737	0.033018	0.999545	Dio2	12	90724552	90738438	-	5815	protein_coding	deiodinase, iodothyronine, type II [Source:MGI Symbol;Acc:MGI:1338833]	-	632	644	538	667	311	598	937	766	699	834	4.16163	4.2756	3.4956	4.36045	1.77284	3.8698	6.12071	5.68642	4.30223	5.2733
ENSMUSG00000030772	3718.01	3209.35	3592.4	2975.05	1712.15	3317.94	4202.94	5369.45	3141.54	4804.4	3041.39	4167.25	-0.454395	0.0331886	0.999545	Dkk3	7	112116017	112159057	-	3359	protein_coding	dickkopf WNT signaling pathway inhibitor 3 [Source:MGI Symbol;Acc:MGI:1354952]	-	3707	3194	3566	2949	1952	3356	4277	4695	3320	4945	42.258	36.7101	40.1107	33.3749	19.2633	37.5966	48.3661	60.3372	35.3749	54.1281
ENSMUSG00000107868	37.1099	35.1682	52.3849	44.3887	41.225	24.7165	22.6018	25.1604	41.6348	30.1186	42.0554	28.8464	0.539013	0.0333306	0.999545	Gm5112	6	122811170	122813537	+	2368	TEC	predicted gene 5112 [Source:MGI Symbol;Acc:MGI:3779460]	-	37	35	52	44	47	25	23	22	44	31	0.598297	0.570621	0.829679	0.706361	0.657925	0.397279	0.368942	0.401052	0.665024	0.481334
ENSMUSG00000024215	12.0356	11.0529	11.0814	23.2032	28.9452	11.8639	4.91343	10.2929	9.46246	8.7441	17.2637	9.05536	0.940512	0.0333382	0.999545	Spdef	17	27714352	27728955	-	2305	protein_coding	SAM pointed domain containing ets transcription factor [Source:MGI Symbol;Acc:MGI:1353422]	ETS	12	11	11	23	33	12	5	9	10	9	0.199346	0.18424	0.180306	0.379326	0.474573	0.195906	0.0823969	0.168551	0.155273	0.143562
ENSMUSG00000046909	75.2228	71.3413	80.5922	64.5653	77.1873	91.9453	100.234	92.6359	84.2159	93.2704	73.7818	92.4603	-0.324298	0.0333818	0.999545	Tefm	11	80136678	80142175	-	1570	protein_coding	transcription elongation factor, mitochondrial [Source:MGI Symbol;Acc:MGI:1915800]	-	75	71	80	64	88	93	102	81	89	96	1.82919	1.7459	1.92521	1.54966	1.85799	2.22905	2.46781	2.22713	2.02888	2.24822
ENSMUSG00000040752	173.514	194.933	249.836	384.365	331.555	202.675	138.559	209.289	206.282	200.143	266.84	191.389	0.480272	0.0333889	0.999545	Myh6	14	54941921	54966927	-	6726	protein_coding	myosin, heavy polypeptide 6, cardiac muscle, alpha [Source:MGI Symbol;Acc:MGI:97255]	-	173	194	248	381	378	205	141	183	218	206	0.984885	1.11354	1.3931	2.15339	1.86292	1.14692	0.796295	1.1745	1.16002	1.1261
ENSMUSG00000027547	11.0327	14.0673	7.05182	15.1325	6.1399	10.8752	0	1.14365	0.946246	4.85784	10.6848	3.5646	1.57372	0.0335111	0.999545	Sall4	2	168748332	168767943	-	5536	protein_coding	spalt like transcription factor 4 [Source:MGI Symbol;Acc:MGI:2139360]	zf-C2H2	11	14	7	15	7	11	0	1	1	5	0.076084	0.0976322	0.0477739	0.103003	0.0419143	0.0747711	0	0.00779764	0.00646503	0.0332078
ENSMUSG00000102260	2.00594	1.00481	2.01481	3.0265	0.877128	3.95464	3.93074	5.71827	5.67748	6.80097	1.78584	5.21642	-1.55983	0.0335428	0.999545	D330025C20Rik	18	80362781	80365826	+	3046	TEC	RIKEN cDNA D330025C20 gene [Source:MGI Symbol;Acc:MGI:3588219]	-	2	1	2	3	1	4	4	5	6	7	0.0251418	0.0126745	0.0248078	0.037441	0.0108825	0.0494159	0.0498818	0.0708597	0.0704998	0.0844957
ENSMUSG00000079019	6.01782	13.0625	3.02221	13.1148	13.1569	1.97732	4.91343	8.00557	2.83874	1.94313	9.67486	3.93564	1.32476	0.0335771	0.999545	Insl3	8	71689214	71690575	+	623	protein_coding	insulin-like 3 [Source:MGI Symbol;Acc:MGI:108427]	-	6	13	3	13	15	2	5	7	3	2	0.368773	0.805594	0.181937	0.793251	0.798111	0.120803	0.304855	0.485031	0.172345	0.118034
ENSMUSG00000062252	98.2911	67.3221	118.874	105.927	319.275	93.9226	67.8053	124.658	65.291	55.3793	141.938	81.4113	0.805833	0.0335892	0.999545	Lhfpl5	17	28575641	28585679	+	2388	protein_coding	lipoma HMGIC fusion partner-like 5 [Source:MGI Symbol;Acc:MGI:1915382]	-	98	67	118	105	364	95	69	109	69	57	1.57141	1.08318	1.86697	1.67152	5.05274	1.49702	1.09756	1.97039	1.03414	0.877621
ENSMUSG00000004815	721.136	710.398	823.048	694.077	1019.22	774.12	615.161	650.739	608.436	606.258	793.577	650.943	0.286539	0.0335906	0.999545	Dgkq	5	108646693	108669672	-	7189	protein_coding	diacylglycerol kinase, theta [Source:MGI Symbol;Acc:MGI:102918]	-	719	707	817	688	1162	783	626	569	643	624	3.82963	3.79675	4.2938	3.63811	5.35794	4.09855	3.30763	3.41667	3.20117	3.19141
ENSMUSG00000112627	65.1931	56.2692	50.3701	82.7243	35.9623	75.1381	76.6494	56.039	104.087	112.702	58.1038	84.9231	-0.553359	0.0338874	0.999545	4933412E12Rik	10	116949757	116963279	+	2434	bidirectional_promoter_lncRNA	RIKEN cDNA 4933412E12 gene [Source:MGI Symbol;Acc:MGI:1918336]	-	65	56	50	82	41	76	78	49	110	116	1.02256	0.888237	0.776136	1.2807	0.558372	1.17498	1.21727	0.86903	1.61748	1.75228
ENSMUSG00000102196	1.00297	0	0	0	0	1.97732	1.96537	3.43096	1.89249	0.971567	0.200594	2.04754	-2.91985	0.0340851	0.999545	Gm38171	2	11315372	11319874	-	478	lincRNA	predicted gene, 38171 [Source:MGI Symbol;Acc:MGI:5611399]	-	1	0	0	0	0	2	2	3	2	1	0.0801067	0	0	0	0	0.157449	0.158933	0.270927	0.149751	0.0769199
ENSMUSG00000029165	445.319	419.004	476.502	467.09	635.041	430.067	354.749	385.411	443.789	390.57	488.591	400.917	0.286072	0.0341105	0.999545	Agbl5	5	30888694	30906965	+	7053	protein_coding	ATP/GTP binding protein-like 5 [Source:MGI Symbol;Acc:MGI:2441745]	-	444	417	473	463	724	435	361	337	469	402	2.41049	2.28257	2.53382	2.49553	3.40271	2.32088	1.94422	2.0626	2.37994	2.09565
ENSMUSG00000021356	7.02079	7.03365	6.04442	1.00883	7.01703	10.8752	20.6364	10.2929	10.4087	7.77254	5.62494	11.9972	-1.08888	0.0342115	0.999545	Irf4	13	30749226	30766976	+	4903	protein_coding	interferon regulatory factor 4 [Source:MGI Symbol;Acc:MGI:1096873]	IRF	7	7	6	1	8	11	21	9	11	8	0.0546679	0.0551185	0.0462358	0.00775343	0.0540864	0.0844244	0.162693	0.0792392	0.0802966	0.0599922
ENSMUSG00000038301	2087.18	1995.55	2090.36	1743.26	1991.08	2270.95	2258.21	2129.48	2078.9	2562.99	1981.49	2260.11	-0.189895	0.0343025	0.999545	Snx10	6	51523901	51590679	+	9300	protein_coding	sorting nexin 10 [Source:MGI Symbol;Acc:MGI:1919232]	-	2081	1986	2075	1728	2270	2297	2298	1862	2197	2638	8.56812	8.24437	8.42993	7.06344	8.09101	9.29426	9.38596	8.64284	8.455	10.4294
ENSMUSG00000025855	13624.4	13621.2	11844	14315.3	13393.8	13979.6	15202.1	15160.3	14382	15863.7	13359.7	14917.6	-0.159111	0.0343667	0.999545	Prkar1b	5	139017306	139150001	-	3810	protein_coding	protein kinase, cAMP dependent regulatory, type I beta [Source:MGI Symbol;Acc:MGI:97759]	-	13584	13556	11757	14190	15270	14140	15470	13256	15199	16328	136.521	137.362	116.59	141.584	132.854	139.657	154.233	150.192	142.776	157.57
ENSMUSG00000107201	60.1782	78.3749	45.3331	57.5035	114.027	48.4443	44.2208	53.7517	53.936	43.7205	71.0833	48.8147	0.547295	0.0344992	0.999545	5930420M18Rik	5	30897300	30899580	+	2281	TEC	RIKEN cDNA 5930420M18 gene [Source:MGI Symbol;Acc:MGI:2441703]	-	60	78	45	57	130	49	45	47	57	45	1.00722	1.32017	0.745377	0.94996	1.8892	0.808366	0.749374	0.889472	0.894368	0.72536
ENSMUSG00000077148	4.01188	3.01442	3.02221	0	0	8.89793	3.93074	4.57461	7.56997	5.8294	2.0097	6.16053	-1.64116	0.0345139	0.999545	Gm22935	3	89097910	89098013	-	104	snRNA	predicted gene, 22935 [Source:MGI Symbol;Acc:MGI:5452712]	-	4	3	3	0	0	9	4	4	8	6	1.47273	1.11365	1.08987	0	0	3.25646	1.46096	1.6603	2.75311	2.12121
ENSMUSG00000055093	126.374	132.635	118.874	124.086	85.0815	77.1154	76.6494	75.4811	120.173	92.2989	117.41	88.3436	0.405624	0.0345189	0.999545	Gm8430	6	122456904	122457374	+	471	processed_pseudogene	predicted pseudogene 8430 [Source:MGI Symbol;Acc:MGI:3645406]	-	126	132	118	123	97	78	78	66	127	95	10.2434	10.8197	9.46563	9.9275	6.8267	6.23176	6.2905	6.04899	9.65049	7.41599
ENSMUSG00000072738	1.00297	2.00961	2.01481	1.00883	3.50851	1.97732	6.8788	6.86192	9.46246	3.88627	1.90895	5.81335	-1.58633	0.0346048	0.999545	Gm16440	14	6380721	6390319	-	1089	protein_coding	predicted gene 16440 [Source:MGI Symbol;Acc:MGI:3647179]	-	1	2	2	1	4	2	7	6	10	4	0.0351616	0.0709028	0.069389	0.0349082	0.121757	0.0691097	0.244164	0.237839	0.328654	0.135051
ENSMUSG00000047911	7.02079	6.02884	8.05922	11.0972	2.63139	5.93195	15.723	9.14923	17.0324	25.2607	6.96748	14.6195	-1.08458	0.0347027	0.999545	Npm2	14	70647302	70659244	-	1036	protein_coding	nucleophosmin/nucleoplasmin 2 [Source:MGI Symbol;Acc:MGI:1890811]	-	7	6	8	11	3	6	16	8	18	26	0.258723	0.22359	0.291755	0.403635	0.095989	0.217936	0.58664	0.333342	0.621841	0.922742
ENSMUSG00000000125	56.1664	93.447	131.97	162.422	157.006	122.594	70.7533	58.3263	73.8072	24.2892	120.202	69.9539	0.781119	0.0347577	0.999545	Wnt3	11	103774150	103817957	+	3076	protein_coding	wingless-type MMTV integration site family, member 3 [Source:MGI Symbol;Acc:MGI:98955]	-	56	93	131	161	179	124	72	51	78	25	0.697105	1.16723	1.60907	1.98973	1.92898	1.51695	0.889115	0.71572	0.907559	0.298827
ENSMUSG00000111605	28.0832	19.0913	16.1184	23.2032	17.5426	13.8412	17.6883	10.2929	13.2474	5.8294	20.8077	12.1799	0.767972	0.0348024	0.999545	4632418H02Rik	9	122127294	122130014	+	2721	TEC	RIKEN cDNA 4632418H02 gene [Source:MGI Symbol;Acc:MGI:1925515]	-	28	19	16	23	20	14	18	9	14	6	0.394027	0.269579	0.222167	0.321333	0.243647	0.193614	0.251279	0.142782	0.184148	0.0810754
ENSMUSG00000111394	428.268	345.654	425.124	366.206	476.281	395.464	368.507	273.333	320.777	309.93	408.307	333.602	0.291263	0.0348962	0.999545	AC160637.1	9	59672814	59676700	+	3887	TEC	novel transcript	-	427	344	422	363	543	400	375	239	339	319	4.20639	3.41669	4.10191	3.55016	4.63069	3.87242	3.66461	2.65426	3.12142	3.01747
ENSMUSG00000020027	363.075	380.822	351.584	320.809	233.316	339.11	385.213	393.417	475.016	492.584	329.921	417.068	-0.339594	0.0349428	0.999545	Socs2	10	95385362	95417180	-	9531	protein_coding	suppressor of cytokine signaling 2 [Source:MGI Symbol;Acc:MGI:1201787]	-	362	379	349	318	266	343	392	344	502	507	1.45434	1.53519	1.38349	1.26836	0.925131	1.35423	1.56228	1.55804	1.88509	1.95585
ENSMUSG00000109635	3.00891	0	6.04442	0	6.1399	0	0.982685	0	0	0	3.03865	0.196537	3.46812	0.0349665	0.999545	Gm45670	7	133747624	133753038	+	711	antisense	predicted gene 45670 [Source:MGI Symbol;Acc:MGI:5791506]	-	3	0	6	0	7	0	1	0	0	0	0.161565	0	0.318838	0	0.326354	0	0.0534247	0	0	0
ENSMUSG00000102243	6.01782	5.02403	7.05182	1.00883	5.26277	3.95464	0.982685	0	0	0.971567	4.87306	1.18178	2.0287	0.0350056	0.999545	Gm37718	1	139155152	139157782	+	2631	TEC	predicted gene, 37718 [Source:MGI Symbol;Acc:MGI:5610946]	-	6	5	7	1	6	4	1	0	0	1	0.0873226	0.0733686	0.100523	0.0144489	0.0755945	0.0572106	0.0144375	0	0	0.0139748
ENSMUSG00000032113	48.1426	37.1779	38.2813	81.7155	74.5559	18.7845	42.2555	44.6025	36.9036	35.948	55.9746	35.6988	0.65319	0.0350073	0.999545	Chek1	9	36708482	36727065	-	4635	protein_coding	checkpoint kinase 1 [Source:MGI Symbol;Acc:MGI:1202065]	-	48	37	38	81	85	19	43	39	39	37	0.396541	0.308186	0.309758	0.664341	0.607896	0.154256	0.352395	0.363224	0.301149	0.293507
ENSMUSG00000029546	27.0802	17.0817	18.1333	30.265	110.518	33.6144	11.7922	26.304	9.46246	6.80097	40.6157	17.5948	1.21528	0.0350122	0.999545	Uncx	5	139543494	139548179	+	3136	protein_coding	UNC homeobox [Source:MGI Symbol;Acc:MGI:108013]	Homeobox	27	17	18	30	126	34	12	23	10	7	0.329674	0.209283	0.216863	0.363664	1.33185	0.407981	0.145351	0.3166	0.114128	0.0820708
ENSMUSG00000038534	570.69	539.581	630.634	621.441	739.419	492.352	389.143	543.235	617.899	481.897	620.353	504.905	0.297655	0.0351452	0.999545	Osbpl7	11	97050628	97068904	+	5920	protein_coding	oxysterol binding protein-like 7 [Source:MGI Symbol;Acc:MGI:1918490]	-	569	537	626	616	843	498	396	475	653	496	3.68033	3.50198	3.99523	3.95562	4.72026	3.16552	2.54089	3.46363	3.94783	3.08054
ENSMUSG00000040749	94.2792	103.495	106.785	71.6271	84.2043	81.07	62.8919	37.7406	72.861	78.6969	92.0781	66.6521	0.4604	0.0351853	0.999545	Siah1b	X	164070705	164076493	-	2119	protein_coding	siah E3 ubiquitin protein ligase 1B [Source:MGI Symbol;Acc:MGI:108063]	-	94	103	106	71	96	82	64	33	77	81	1.69861	1.87658	1.89001	1.27375	1.50176	1.4562	1.14726	0.672268	1.30055	1.40547
ENSMUSG00000096753	66.1961	47.2259	54.3998	34.3003	85.9586	62.2855	35.3767	28.5913	27.4411	28.1754	57.6161	36.374	0.665303	0.0353242	0.999545	Fam181a	12	103310975	103317065	+	1537	protein_coding	family with sequence similarity 181, member A [Source:MGI Symbol;Acc:MGI:3647570]	-	66	47	54	34	98	63	36	25	29	29	1.64425	1.18055	1.32742	0.840931	2.11355	1.54242	0.889693	0.702143	0.675291	0.69373
ENSMUSG00000004651	1.00297	1.00481	0	0	0.877128	3.95464	2.94806	4.57461	5.67748	0	0.576981	3.43096	-2.55335	0.035533	0.999545	Tyr	7	87424771	87493512	-	7108	protein_coding	tyrosinase [Source:MGI Symbol;Acc:MGI:98880]	-	1	1	0	0	1	4	3	4	6	0	0.00538703	0.00543142	0	0	0.00466351	0.0211763	0.0160319	0.0242925	0.0302114	0
ENSMUSG00000108195	7.02079	7.03365	2.01481	9.0795	1.75426	0.988659	2.94806	0	2.83874	0	5.3806	1.35509	1.95428	0.0355634	0.999545	Gm44415	6	87138741	87140852	-	2112	TEC	predicted gene, 44415 [Source:MGI Symbol;Acc:MGI:5690807]	-	7	7	2	9	2	1	3	0	3	0	0.126911	0.127957	0.0357787	0.161996	0.0313903	0.0178173	0.0539559	0	0.0508386	0
ENSMUSG00000097005	1.00297	3.01442	7.05182	5.04417	3.50851	0	1.96537	0	0	1.94313	3.92438	0.781701	2.3015	0.0357122	0.999545	4930598A11Rik	4	20032846	20041564	-	628	lincRNA	RIKEN cDNA 4930598A11 gene [Source:MGI Symbol;Acc:MGI:2152336]	-	1	3	7	5	4	0	2	0	0	2	0.0609729	0.184426	0.421141	0.302668	0.211135	0	0.120971	0	0	0.117095
ENSMUSG00000023266	454.346	499.389	461.39	571	806.081	444.896	384.23	523.793	442.843	360.451	558.441	431.243	0.374293	0.0358412	0.999545	Frs3	17	47689030	47704286	+	3128	protein_coding	fibroblast growth factor receptor substrate 3 [Source:MGI Symbol;Acc:MGI:2135965]	-	453	497	458	566	919	450	391	458	468	371	5.54534	6.1341	5.53207	6.87868	9.73888	5.41356	4.74812	6.3206	5.35483	4.36088
ENSMUSG00000084782	5.01485	5.02403	5.03701	0	3.50851	0	0	1.14365	0	1.94313	3.71688	0.617358	2.61499	0.0358711	0.999545	Gm11213	4	63596901	63605261	-	684	protein_coding	predicted gene 11213 [Source:MGI Symbol;Acc:MGI:3701774]	-	5	5	5	0	4	0	0	1	0	2	0.279905	0.282212	0.276187	0	0.193849	0	0	0.0631108	0	0.107508
ENSMUSG00000021876	252.749	257.231	280.058	330.897	232.439	195.754	236.827	236.736	234.669	217.631	270.675	224.324	0.270333	0.0361282	0.999545	Rnase4	14	51091077	51106151	+	1637	protein_coding	ribonuclease, RNase A family 4 [Source:MGI Symbol;Acc:MGI:1926217]	-	252	256	278	328	265	198	241	207	248	224	5.89452	6.03743	6.4163	7.61694	5.36608	4.55149	5.59216	5.4586	5.42213	5.03113
ENSMUSG00000068015	440.304	485.322	633.656	680.962	762.225	553.649	439.26	462.036	494.887	417.774	600.494	473.521	0.343162	0.0361347	0.999545	Lrch1	14	74754675	74947876	-	7734	protein_coding	leucine-rich repeats and calponin homology (CH) domain containing 1 [Source:MGI Symbol;Acc:MGI:2443390]	-	439	483	629	675	869	560	447	404	523	430	2.17349	2.41104	3.07281	3.31784	3.72457	2.72471	2.19541	2.25495	2.42027	2.04423
ENSMUSG00000049600	485.438	509.437	490.605	548.805	465.755	535.853	588.628	538.661	616.952	560.594	500.008	568.138	-0.185482	0.0361604	0.999545	Zbtb45	7	13003898	13010034	-	4210	protein_coding	zinc finger and BTB domain containing 45 [Source:MGI Symbol;Acc:MGI:2685003]	ZBTB	484	507	487	544	531	542	599	471	652	577	4.4021	4.64929	4.37054	4.91216	4.18093	4.84456	5.40451	4.82946	5.54284	5.03918
ENSMUSG00000042258	152.452	152.731	191.407	135.184	435.933	192.788	122.836	138.382	132.474	68.0097	213.541	130.898	0.707676	0.0362852	0.999545	Isl1	13	116298281	116309689	-	3959	protein_coding	ISL1 transcription factor, LIM/homeodomain [Source:MGI Symbol;Acc:MGI:101791]	Homeobox	152	152	190	134	497	195	125	121	140	70	1.47013	1.48224	1.81325	1.28669	4.16132	1.85347	1.19932	1.31935	1.26564	0.650098
ENSMUSG00000068290	1251.71	1305.24	1436.56	1523.34	1560.41	1060.83	1003.32	1422.7	1354.08	995.856	1415.45	1167.36	0.278486	0.0365091	0.999545	Ddrgk1	2	130653960	130664659	-	2084	protein_coding	DDRGK domain containing 1 [Source:MGI Symbol;Acc:MGI:1924256]	-	1248	1299	1426	1510	1779	1073	1021	1244	1431	1025	22.9305	24.0643	25.853	27.5445	28.2969	19.3749	18.6097	25.7681	24.5758	18.0839
ENSMUSG00000058523	1.00297	1.00481	2.01481	4.03533	0	2.96598	5.89611	9.14923	5.67748	2.9147	1.61158	5.3207	-1.73802	0.0365457	0.999545	Mup5	4	61831319	61835233	-	925	protein_coding	major urinary protein 5 [Source:MGI Symbol;Acc:MGI:104974]	-	1	1	2	4	0	3	6	8	6	3	0.0413957	0.0417368	0.0816915	0.164389	0	0.122044	0.246389	0.373343	0.232154	0.119247
ENSMUSG00000050370	7.02079	20.0961	10.074	35.3092	15.7883	7.90927	3.93074	11.4365	12.3012	6.80097	17.6577	8.47574	1.06174	0.0366973	0.999545	Ch25h	19	34473786	34475135	-	1350	protein_coding	cholesterol 25-hydroxylase [Source:MGI Symbol;Acc:MGI:1333869]	-	7	20	10	35	18	8	4	10	13	7	0.198546	0.571949	0.279869	0.985575	0.441976	0.222994	0.112548	0.319761	0.344648	0.190647
ENSMUSG00000100213	82.2436	104.5	69.5108	107.945	74.5559	109.741	116.94	84.6304	121.12	150.593	87.7511	116.605	-0.414093	0.0367414	0.999545	Gm28151	1	46849529	46850479	-	951	lincRNA	predicted gene 28151 [Source:MGI Symbol;Acc:MGI:5578857]	-	82	104	69	107	85	111	119	74	128	155	3.30164	4.22196	2.7413	4.27719	2.96277	4.39217	4.75311	3.35901	4.81722	5.99263
ENSMUSG00000086591	4.01188	0	4.02961	7.06183	5.26277	0	1.96537	1.14365	0	0.971567	4.07322	0.816118	2.33794	0.0367855	0.999545	Dnah2os	11	69448548	69453676	+	859	antisense	dynein, axonemal, heavy chain 2, opposite strand [Source:MGI Symbol;Acc:MGI:1924973]	-	4	0	4	7	6	0	2	1	0	1	0.178305	0	0.175936	0.309785	0.231536	0	0.0884399	0.0502535	0	0.0428029
ENSMUSG00000009394	10287.5	9340.68	9780.87	7951.62	7220.52	10627.1	9880.9	9716.48	10404	12789.7	8916.23	10683.6	-0.26096	0.0369032	0.999545	Syn2	6	115134902	115282006	+	7031	protein_coding	synapsin II [Source:MGI Symbol;Acc:MGI:103020]	-	10257	9296	9709	7882	8232	10749	10055	8496	10995	13164	55.8598	51.0435	52.173	42.6162	38.8104	57.5292	54.3221	52.1623	55.9686	68.8394
ENSMUSG00000089996	0	1.00481	1.0074	0	0	5.93195	4.91343	1.14365	0	2.9147	0.402442	2.98075	-2.89858	0.0370566	0.999545	Tmsb15b2	X	136955265	136975497	-	550	protein_coding	thymosin beta 15b2 [Source:MGI Symbol;Acc:MGI:3843061]	-	0	1	1	0	0	6	5	1	0	3	0	0.0701938	0.0686951	0	0	0.410512	0.345318	0.0784868	0	0.200551
ENSMUSG00000054944	21.0624	27.1298	22.1629	17.1502	3.50851	22.7392	52.0823	36.5969	23.6562	32.0617	18.2027	33.4272	-0.88321	0.0371352	0.999545	5330416C01Rik	13	97733498	97747411	-	3675	lincRNA	RIKEN cDNA 5330416C01 gene [Source:MGI Symbol;Acc:MGI:2685378]	-	21	27	22	17	4	23	53	32	25	33	0.218806	0.28364	0.22618	0.175852	0.0360797	0.235509	0.54781	0.375883	0.243472	0.330159
ENSMUSG00000031672	3780.2	3808.22	3895.63	4234.07	3919.89	4363.94	4222.6	4255.53	4163.48	4360.39	3927.6	4273.19	-0.121673	0.0371656	0.999545	Got2	8	95864134	95888547	-	4824	protein_coding	glutamatic-oxaloacetic transaminase 2, mitochondrial [Source:MGI Symbol;Acc:MGI:95792]	-	3769	3790	3867	4197	4469	4414	4297	3721	4400	4488	29.9168	30.3314	30.2869	33.074	30.7088	34.432	33.8353	33.2975	32.6446	34.2068
ENSMUSG00000106775	8.02377	17.0817	52.3849	34.3003	211.388	20.7618	10.8095	43.4588	8.51622	5.8294	64.6357	17.8752	1.86001	0.0372388	0.999545	C130093G08Rik	6	23251133	23253358	+	2226	TEC	RIKEN cDNA C130093G08 gene [Source:MGI Symbol;Acc:MGI:2443208]	-	8	17	52	34	241	21	11	38	9	6	0.137614	0.294839	0.882606	0.580643	3.58882	0.355002	0.187706	0.736916	0.144705	0.0991043
ENSMUSG00000081800	3.00891	5.02403	0	11.0972	0	0	0.982685	1.14365	0	0	3.82602	0.425268	3.21311	0.0372418	0.999545	Gm14200	2	158468169	158468360	-	192	processed_pseudogene	predicted gene 14200 [Source:MGI Symbol;Acc:MGI:3651374]	-	3	5	0	11	0	0	1	1	0	0	0.598297	1.00538	0	2.17795	0	0	0.197838	0.224832	0	0
ENSMUSG00000022818	0	8.03845	0	3.0265	2.63139	0	0	0	0	0	2.73927	0	3.89019	0.0372651	0.999545	Cyp2ab1	16	20308387	20325404	-	3144	protein_coding	cytochrome P450, family 2, subfamily ab, polypeptide 1 [Source:MGI Symbol;Acc:MGI:3644957]	-	0	8	0	3	3	0	0	0	0	0	0	0.0982355	0	0.0362739	0.03163	0	0	0	0	0
ENSMUSG00000096775	10.0297	21.1009	12.0888	21.1855	57.0134	8.89793	6.8788	11.4365	17.9787	13.6019	24.2837	11.7588	1.05148	0.0374414	0.999545	Gm5796	14	4023941	4041370	+	1817	protein_coding	predicted gene 5796 [Source:MGI Symbol;Acc:MGI:3779522]	-	10	21	12	21	65	9	7	10	19	14	0.210737	0.446196	0.249526	0.439359	1.18582	0.186391	0.146337	0.237577	0.374253	0.283295
ENSMUSG00000029924	945.801	911.36	851.255	764.695	692.054	904.623	1000.37	966.387	989.773	976.425	833.033	967.516	-0.21651	0.037468	0.999545	Slc37a3	6	39334773	39377675	-	5409	protein_coding	solute carrier family 37 (glycerol-3-phosphate transporter), member 3 [Source:MGI Symbol;Acc:MGI:1919394]	-	943	907	845	758	789	915	1018	845	1046	1005	6.67561	6.47368	5.9024	5.32731	4.83526	6.36563	7.14895	6.74372	6.9212	6.83149
ENSMUSG00000113491	40.1188	27.1298	12.0888	20.1767	26.3139	11.8639	28.4979	8.00557	8.51622	8.7441	25.1656	13.1255	0.935823	0.0375026	0.999545	Gm19221	12	69980886	69982468	+	1477	processed_pseudogene	predicted gene, 19221 [Source:MGI Symbol;Acc:MGI:5011406]	-	40	27	12	20	30	12	29	7	9	9	1.03699	0.70574	0.306965	0.51476	0.673288	0.30573	0.745812	0.204587	0.218086	0.224042
ENSMUSG00000115373	16.0475	22.1058	23.1703	31.2738	10.5255	9.88659	7.86148	11.4365	17.9787	10.6872	20.6246	11.5701	0.825735	0.0375091	0.999545	Gm49194	14	45273250	45274723	+	1474	sense_intronic	predicted gene, 49194 [Source:MGI Symbol;Acc:MGI:6118637]	-	16	22	23	31	12	10	8	10	19	11	0.415642	0.576217	0.589548	0.799502	0.269863	0.255293	0.20616	0.292861	0.461342	0.274386
ENSMUSG00000044933	483.432	438.096	430.161	402.524	263.139	392.498	567.009	527.224	485.424	641.234	403.47	522.678	-0.374272	0.0375792	0.999545	Sstr3	15	78537008	78544685	-	4320	protein_coding	somatostatin receptor 3 [Source:MGI Symbol;Acc:MGI:98329]	-	482	436	427	399	300	397	577	461	513	660	4.27228	3.8964	3.7345	3.51111	2.30196	3.45815	5.07345	4.60656	4.25011	5.61729
ENSMUSG00000087523	55.1634	30.1442	64.4738	74.6536	64.0304	26.6938	44.2208	56.039	33.1186	31.0901	57.6931	38.2325	0.599929	0.0375867	0.999545	Gm12319	11	70654741	70656493	-	357	lincRNA	predicted gene 12319 [Source:MGI Symbol;Acc:MGI:3649749]	-	55	30	64	74	73	27	45	49	35	32	5.89917	3.24425	6.7733	7.87987	6.7782	2.84598	4.78802	5.92499	3.50886	3.2957
ENSMUSG00000029784	8.02377	2.00961	0	1.00883	1.75426	11.8639	9.82685	3.43096	8.51622	4.85784	2.55929	7.69915	-1.59875	0.0376028	0.999545	Ssmem1	6	30509849	30520254	+	1807	protein_coding	serine-rich single-pass membrane protein 1 [Source:MGI Symbol;Acc:MGI:1922897]	-	8	2	0	1	2	12	10	3	9	5	0.169523	0.04273	0	0.0210377	0.0366887	0.249896	0.21021	0.0716676	0.178259	0.101737
ENSMUSG00000066043	239.71	283.356	317.332	328.88	307.872	242.221	247.637	229.874	289.551	213.745	295.43	244.606	0.271733	0.0376868	0.999545	Phactr4	4	132355923	132422489	-	4960	protein_coding	phosphatase and actin regulator 4 [Source:MGI Symbol;Acc:MGI:2140327]	-	239	282	315	326	351	245	252	201	306	220	1.84507	2.19497	2.39948	2.49857	2.34577	1.85875	1.92988	1.74934	2.20804	1.63083
ENSMUSG00000056025	9.02674	14.0673	15.111	26.2297	21.0511	8.89793	2.94806	11.4365	10.4087	11.6588	17.0972	9.07001	0.920578	0.0377977	0.999545	Clca3a1	3	144729677	144760977	-	3899	protein_coding	chloride channel accessory 3A1 [Source:MGI Symbol;Acc:MGI:1316732]	-	9	14	15	26	24	9	3	10	11	12	0.0883865	0.138623	0.145354	0.253499	0.204041	0.0868613	0.0292267	0.110715	0.100973	0.11316
ENSMUSG00000081016	8.02377	2.00961	0	0	5.26277	0.988659	0	0	0	0	3.05923	0.197732	3.47645	0.0378008	0.999545	Olfr1397-ps1	11	108687074	108688035	-	962	unprocessed_pseudogene	olfactory receptor 1397, pseudogene 1 [Source:MGI Symbol;Acc:MGI:3031231]	-	8	2	0	0	6	1	0	0	0	0	0.318428	0.0802631	0	0	0.206746	0.0391167	0	0	0	0
ENSMUSG00000018569	3.00891	3.01442	5.03701	2.01767	15.7883	1.97732	2.94806	1.14365	1.89249	0	5.77327	1.5923	1.86781	0.0378938	0.999545	Cldn7	11	69964779	69967885	+	1948	protein_coding	claudin 7 [Source:MGI Symbol;Acc:MGI:1859285]	-	3	3	5	2	18	2	3	1	2	0	0.0589697	0.0594557	0.0969772	0.0390298	0.306298	0.0386347	0.0584984	0.02216	0.0367458	0
ENSMUSG00000078302	40.1188	29.1394	49.3627	41.3622	51.7506	24.7165	32.4286	37.7406	31.2261	20.4029	42.3467	29.3029	0.53885	0.038044	0.999545	Foxd1	13	98354242	98359305	+	5064	protein_coding	forkhead box D1 [Source:MGI Symbol;Acc:MGI:1347463]	Fork	40	29	49	41	59	25	33	33	33	21	0.302456	0.221088	0.365587	0.307784	0.386205	0.185773	0.247532	0.281306	0.233231	0.152473
ENSMUSG00000116633	3.00891	3.01442	4.02961	0	1.75426	10.8752	7.86148	4.57461	8.51622	1.94313	2.36144	6.75414	-1.52505	0.0381106	0.999545	CT009594.1	17	21394078	21395117	-	1040	processed_pseudogene	crumbs family member 1, photoreceptor morphogenesis associated (Crb1) pseudogene	-	3	3	4	0	2	11	8	4	9	2	0.110455	0.111365	0.145317	0	0.0637466	0.398012	0.292192	0.16603	0.309725	0.0707071
ENSMUSG00000102914	0	4.01923	2.01481	4.03533	2.63139	4.94329	10.8095	4.57461	3.78498	10.6872	2.54015	6.95993	-1.45781	0.0381107	0.999545	Gm35106	3	65968902	65969151	-	250	processed_pseudogene	predicted gene, 35106 [Source:MGI Symbol;Acc:MGI:5594265]	-	0	4	2	4	3	5	11	4	4	11	0	0.617705	0.302259	0.608241	0.397778	0.752605	1.67134	0.690684	0.572646	1.61778
ENSMUSG00000109935	4.01188	1.00481	5.03701	0	0.877128	0	0	0	0	0	2.18617	0	3.56135	0.0381638	0.999545	Gm7619	8	65131033	65132314	-	1282	processed_pseudogene	predicted gene 7619 [Source:MGI Symbol;Acc:MGI:3644741]	-	4	1	5	0	1	0	0	0	0	0	0.119473	0.0301143	0.147357	0	0.0258566	0	0	0	0	0
ENSMUSG00000080783	4.01188	5.02403	1.0074	9.0795	2.63139	0	0	2.28731	1.89249	0.971567	4.35084	1.03027	2.09999	0.0381643	0.999545	Gm8250	19	18581455	18582228	+	774	processed_pseudogene	predicted gene 8250 [Source:MGI Symbol;Acc:MGI:3647615]	-	4	5	1	9	3	0	0	2	2	1	0.197886	0.249396	0.0488144	0.442035	0.128481	0	0	0.111545	0.0924817	0.0475035
ENSMUSG00000105271	13.0386	16.0769	5.03701	7.06183	2.63139	8.89793	23.5844	11.4365	24.6024	21.3745	8.76915	17.9792	-1.04895	0.0383205	0.999545	Gm42875	5	128769524	128777837	+	1015	antisense	predicted gene 42875 [Source:MGI Symbol;Acc:MGI:5663012]	-	13	16	5	7	3	9	24	10	26	22	0.490426	0.608576	0.18612	0.262173	0.097975	0.333667	0.898166	0.425298	0.916799	0.796935
ENSMUSG00000084817	10.0297	16.0769	8.05922	12.106	12.2798	24.7165	17.6883	21.7294	14.1937	18.4598	11.7103	19.3575	-0.720475	0.0383664	0.999545	Gm5526	1	45857332	45857754	-	423	processed_pseudogene	predicted pseudogene 5526 [Source:MGI Symbol;Acc:MGI:3643066]	-	10	16	8	12	14	25	18	19	15	19	0.905224	1.4603	0.714559	1.07844	1.0971	2.22401	1.61638	1.93898	1.26916	1.6515
ENSMUSG00000081382	0	2.00961	2.01481	3.0265	2.63139	0	0	0	0	0	1.93646	0	3.39252	0.0384787	0.999545	Rpl18-ps1	1	60900898	60901422	+	525	processed_pseudogene	ribosomal protein L18, pseudogene 1 [Source:MGI Symbol;Acc:MGI:98018]	-	0	2	2	3	3	0	0	0	0	0	0	0.147073	0.143933	0.217229	0.189418	0	0	0	0	0
ENSMUSG00000080478	0	0	0	0	0	0.988659	0	2.28731	3.78498	2.9147	0	1.99513	-3.47109	0.0388049	0.999545	Snord23	7	15938762	15938870	-	109	snoRNA	small nucleolar RNA, C/D box 23 [Source:MGI Symbol;Acc:MGI:3819529]	-	0	0	0	0	0	1	0	2	4	3	0	0	0	0	0	0.345232	0	0.792069	1.31341	1.01196
ENSMUSG00000004952	154.457	173.832	236.74	345.021	533.294	225.414	153.299	179.554	239.4	117.56	288.669	183.045	0.657984	0.0390171	0.999545	Rasa4	5	136083916	136111860	+	7485	protein_coding	RAS p21 protein activator 4 [Source:MGI Symbol;Acc:MGI:1858600]	-	154	173	235	342	608	228	156	157	253	121	0.787817	0.892309	1.18622	1.73696	2.6926	1.14625	0.79167	0.905456	1.20975	0.594374
ENSMUSG00000028661	281.835	317.519	316.324	369.233	288.575	263.972	289.892	149.819	302.799	181.683	314.697	237.633	0.403282	0.0390538	0.999545	Epha8	4	136929419	136956816	-	4713	protein_coding	Eph receptor A8 [Source:MGI Symbol;Acc:MGI:109378]	-	281	316	314	366	329	267	295	131	320	187	2.283	2.58852	2.51722	2.95216	2.31397	2.13182	2.37759	1.19987	2.43007	1.45885
ENSMUSG00000026639	83.2466	79.3797	89.6589	83.7331	149.112	86.0133	59.9438	78.9121	71.9147	54.4078	97.026	70.2383	0.470964	0.0391103	0.999545	Lamb3	1	193207699	193343878	+	6612	protein_coding	laminin, beta 3 [Source:MGI Symbol;Acc:MGI:99915]	-	83	79	89	83	170	87	61	69	76	56	0.480664	0.46127	0.508564	0.4772	0.852268	0.495135	0.350436	0.45048	0.411384	0.311402
ENSMUSG00000039754	117.348	120.577	170.251	163.431	134.201	94.9112	117.922	99.4978	128.689	115.616	141.161	111.327	0.340208	0.0391921	0.999545	Alkbh4	5	136136146	136141615	+	2117	protein_coding	alkB homolog 4, lysine demethylase [Source:MGI Symbol;Acc:MGI:1919291]	-	117	120	169	162	153	96	120	87	136	119	2.11622	2.18837	3.01616	2.90904	2.39569	1.70643	2.15314	1.77402	2.29924	2.06677
ENSMUSG00000097281	0	0	0	0	0	2.96598	0	0	10.4087	0.971567	0	2.86925	-4.00097	0.0392949	0.999545	Gm26685	1	164503309	164514882	+	2023	lincRNA	predicted gene, 26685 [Source:MGI Symbol;Acc:MGI:5477179]	-	0	0	0	0	0	3	0	0	11	1	0	0	0	0	0	0.0558036	0	0	0.194609	0.0181748
ENSMUSG00000020032	1278.79	1252.99	950.988	897.861	677.143	1141.9	1529.06	1234	1220.66	1349.51	1011.55	1295.03	-0.356773	0.0393013	0.999545	Nuak1	10	84370905	84440597	-	5625	protein_coding	NUAK family, SNF1-like kinase, 1 [Source:MGI Symbol;Acc:MGI:1925226]	-	1275	1247	944	890	772	1155	1556	1079	1290	1389	8.67929	8.55865	6.34071	6.01483	4.54941	7.72674	10.5075	8.28054	8.20793	9.07917
ENSMUSG00000048752	28.0832	19.0913	24.1777	23.2032	59.6447	18.7845	11.7922	18.2985	19.8712	22.346	30.84	18.2185	0.766323	0.0393484	0.999545	Prss50	9	110857967	110864629	+	1456	protein_coding	protease, serine 50 [Source:MGI Symbol;Acc:MGI:2447303]	-	28	19	24	23	68	19	12	16	21	23	0.736365	0.503794	0.622786	0.600512	1.54813	0.491054	0.313063	0.474371	0.516208	0.580809
ENSMUSG00000025961	23.0683	14.0673	18.1333	20.1767	10.5255	29.6598	41.2728	19.4421	28.3874	19.4313	17.1942	27.6387	-0.694252	0.0393532	0.999545	4933402D24Rik	1	63754907	63769267	-	1758	protein_coding	RIKEN cDNA 4933402D24 gene [Source:MGI Symbol;Acc:MGI:1921676]	-	23	14	18	20	12	30	42	17	30	20	0.500963	0.307447	0.38685	0.432481	0.226268	0.642154	0.90749	0.417436	0.610758	0.41829
ENSMUSG00000086165	4.01188	11.0529	7.05182	23.2032	7.89416	6.92061	0.982685	5.71827	0.946246	5.8294	10.6428	4.07944	1.39149	0.0394244	0.999545	Gm15690	5	120479842	120480903	-	432	antisense	predicted gene 15690 [Source:MGI Symbol;Acc:MGI:3783131]	-	4	11	7	23	9	7	1	5	1	6	0.354546	0.983038	0.612214	2.02395	0.690588	0.609749	0.0879281	0.499627	0.0828482	0.510663
ENSMUSG00000050248	361.069	405.942	391.88	326.862	209.634	350.974	373.42	430.014	517.597	584.883	339.077	451.378	-0.41381	0.0394757	0.999545	Evc2	5	37338499	37425055	+	5837	protein_coding	EvC ciliary complex subunit 2 [Source:MGI Symbol;Acc:MGI:1915775]	-	360	404	389	324	239	355	380	376	547	602	2.36162	2.6721	2.51796	2.11014	1.35728	2.28863	2.47289	2.78072	3.35401	3.79204
ENSMUSG00000052281	7.02079	11.0529	14.1036	13.1148	10.5255	19.7732	18.671	27.4477	22.7099	8.7441	11.1635	19.4692	-0.797796	0.0395144	0.999545	Tspan32os	7	142988969	143008033	-	995	antisense	tetraspanin 32, opposite strand [Source:MGI Symbol;Acc:MGI:3705185]	-	7	11	14	13	12	20	19	24	24	9	0.269384	0.426806	0.531611	0.496679	0.399777	0.756387	0.725341	1.04123	0.863286	0.332572
ENSMUSG00000044387	5.01485	5.02403	10.074	9.0795	4.38564	7.90927	20.6364	18.2985	7.56997	12.6304	6.71561	13.4089	-0.998031	0.039525	0.999545	2410080I02Rik	19	23134900	23135717	+	414	lincRNA	RIKEN cDNA 2410080I02 gene [Source:MGI Symbol;Acc:MGI:1915498]	-	5	5	10	9	5	8	21	16	8	13	0.462451	0.466263	0.912616	0.826414	0.400341	0.727154	1.92677	1.66832	0.691602	1.15454
ENSMUSG00000056508	103.306	116.558	135.999	95.8391	147.358	93.9226	81.5629	106.36	98.4096	92.2989	119.812	94.5107	0.346017	0.0395744	0.999545	1700001K19Rik	12	110667688	110682619	-	955	protein_coding	RIKEN cDNA 1700001K19 gene [Source:MGI Symbol;Acc:MGI:1913573]	-	103	116	135	95	168	95	83	93	104	95	4.12981	4.68938	5.34096	3.7816	5.83131	3.74332	3.30131	4.20377	3.89759	3.65752
ENSMUSG00000055897	494.465	540.586	650.782	595.211	894.671	533.876	475.62	556.959	516.65	434.29	635.143	503.479	0.33621	0.0397866	0.999545	Ppp4r1l-ps	2	173579320	173659640	-	12025	transcribed_unprocessed_pseudogene	protein phosphatase 4, regulatory subunit 1-like, pseudogene [Source:MGI Symbol;Acc:MGI:1924560]	-	493	538	646	590	1020	540	484	487	546	447	1.56985	1.72726	2.02972	1.86519	2.81174	1.68984	1.52887	1.74825	1.62508	1.36675
ENSMUSG00000095427	8.02377	2.00961	6.04442	3.0265	3.50851	2.96598	0	0	1.89249	0.971567	4.52256	1.16601	1.92459	0.0397896	0.999545	Rps2-ps6	14	76236691	76237545	-	855	processed_pseudogene	ribosomal protein S2, pseudogene 6 [Source:MGI Symbol;Acc:MGI:3644876]	-	8	2	6	3	4	3	0	0	2	1	0.358278	0.0903078	0.265139	0.133386	0.155079	0.132036	0	0	0.0837202	0.0430032
ENSMUSG00000105571	3.00891	6.02884	0	3.0265	5.26277	28.6711	25.5498	1.14365	7.56997	0.971567	3.4654	12.7812	-1.88046	0.0398205	0.999545	Gm43662	5	14778932	14781202	+	2271	TEC	predicted gene 43662 [Source:MGI Symbol;Acc:MGI:5663799]	-	3	6	0	3	6	29	26	1	8	1	0.0505825	0.101999	0	0.050218	0.0875778	0.480527	0.434878	0.0190083	0.126078	0.0161901
ENSMUSG00000097649	73.2169	85.4086	84.6218	134.175	75.4331	108.752	93.3551	133.807	139.098	131.162	90.571	121.235	-0.421695	0.0398497	0.999545	Gm10561	1	55226251	55235622	+	1943	antisense	predicted gene 10561 [Source:MGI Symbol;Acc:MGI:3648163]	-	73	85	84	133	86	110	95	117	147	135	1.43862	1.68891	1.63341	2.60216	1.46719	2.13038	1.85722	2.5994	2.70777	2.55463
ENSMUSG00000058454	679.011	705.374	669.923	690.042	747.313	658.447	586.663	551.241	684.136	584.883	698.333	613.074	0.18734	0.0398823	0.999545	Dhcr7	7	143823145	143848410	+	5817	protein_coding	7-dehydrocholesterol reductase [Source:MGI Symbol;Acc:MGI:1298378]	-	677	702	665	684	852	666	597	482	723	602	4.45642	4.65907	4.31928	4.47005	4.85513	4.30836	3.8984	3.57691	4.44842	3.80508
ENSMUSG00000032179	4.01188	4.01923	2.01481	1.00883	0	7.90927	15.723	6.86192	0.946246	4.85784	2.21095	7.25965	-1.73059	0.0399421	0.999545	Bmp5	9	75775364	75900310	+	4025	protein_coding	bone morphogenetic protein 5 [Source:MGI Symbol;Acc:MGI:88181]	-	4	4	2	1	0	8	16	6	1	5	0.0380531	0.0383668	0.0187738	0.00944473	0	0.074793	0.150996	0.0643495	0.00889203	0.0456742
ENSMUSG00000106743	89.2644	95.4567	68.5034	72.636	62.2761	100.843	115.957	131.52	78.5384	88.4126	77.6273	103.054	-0.407385	0.0399867	0.999545	Gm42847	5	33990510	33993062	-	2553	TEC	predicted gene 42847 [Source:MGI Symbol;Acc:MGI:5662984]	-	89	95	68	72	71	102	118	115	83	91	1.33486	1.43659	1.00634	1.0721	0.921866	1.50344	1.75567	1.94449	1.16357	1.31056
ENSMUSG00000105748	7.02079	14.0673	8.05922	7.06183	10.5255	15.8185	17.6883	22.8731	10.4087	15.5451	9.34694	16.4667	-0.806359	0.0401179	0.999545	Gm43088	3	137897144	137899490	+	2347	TEC	predicted gene 43088 [Source:MGI Symbol;Acc:MGI:5663225]	-	7	14	8	7	12	16	18	20	11	16	0.114204	0.230291	0.128785	0.113381	0.169484	0.256533	0.29132	0.367855	0.167744	0.250653
ENSMUSG00000102413	56.1664	72.3461	48.3553	50.4417	41.225	61.2968	73.7014	73.1938	105.033	58.294	53.7069	74.3039	-0.4718	0.0401489	0.999545	Gm36937	1	172322994	172323661	+	429	antisense	predicted gene, 36937 [Source:MGI Symbol;Acc:MGI:5610165]	-	56	72	48	50	47	62	75	64	111	60	4.99836	6.47942	4.22739	4.43066	3.63162	5.4384	6.64073	6.43995	9.26045	5.14234
ENSMUSG00000085087	3.00891	2.00961	1.0074	5.04417	5.26277	0	1.96537	0	0.946246	0	3.26657	0.582323	2.46149	0.0402113	0.999545	Gm13528	2	33177902	33181881	+	410	antisense	predicted gene 13528 [Source:MGI Symbol;Acc:MGI:3651630]	-	3	2	1	5	6	0	2	0	1	0	0.280178	0.188325	0.092152	0.463598	0.485096	0	0.185292	0	0.0872937	0
ENSMUSG00000096107	22.0654	22.1058	12.0888	14.1237	1.75426	17.7959	55.0304	29.735	21.7637	22.346	14.4276	29.3342	-1.03043	0.040354	0.999545	Gm16505	13	3358273	3363862	+	1627	transcribed_unprocessed_pseudogene	predicted gene 16505 [Source:MGI Symbol;Acc:MGI:3642261]	-	22	22	12	14	2	18	56	26	23	23	0.517764	0.522031	0.278665	0.327112	0.0407476	0.416315	1.30741	0.689835	0.505949	0.519765
ENSMUSG00000112054	20.0594	18.0865	21.1555	23.2032	69.2932	20.7618	10.8095	26.304	7.56997	12.6304	30.3595	15.6151	0.973846	0.0404108	0.999545	Gm33680	12	45466273	45546677	+	7020	lincRNA	predicted gene, 33680 [Source:MGI Symbol;Acc:MGI:5592839]	-	20	18	21	23	79	21	11	23	8	13	0.109091	0.0989912	0.113024	0.124551	0.373035	0.112569	0.0595206	0.141433	0.0407868	0.0680883
ENSMUSG00000026601	11.0327	13.0625	8.05922	4.03533	3.50851	11.8639	6.8788	30.8786	24.6024	10.6872	7.93965	16.9822	-1.09745	0.0404982	0.999545	Axdnd1	1	156323509	156421159	-	6014	protein_coding	axonemal dynein light chain domain containing 1 [Source:MGI Symbol;Acc:MGI:1924602]	-	11	13	8	4	4	12	7	27	26	11	0.0700367	0.0834528	0.0502592	0.0252844	0.0220474	0.0750853	0.0442126	0.193803	0.154731	0.0672505
ENSMUSG00000034522	246.731	263.259	334.458	277.429	471.018	281.768	236.827	258.466	245.078	193.342	318.579	243.096	0.391752	0.0405377	0.999545	Zfp395	14	65358389	65398930	+	4733	protein_coding	zinc finger protein 395 [Source:MGI Symbol;Acc:MGI:2682318]	-	246	262	332	275	537	285	241	226	259	199	1.99019	2.13711	2.65027	2.20878	3.76095	2.26592	1.93416	2.06125	1.95853	1.54591
ENSMUSG00000027628	611.812	702.36	648.767	708.201	614.867	707.88	787.131	758.242	755.104	698.557	657.201	741.383	-0.174173	0.0405414	0.999545	Aar2	2	156547584	156568972	+	3615	protein_coding	AAR2 splicing factor homolog [Source:MGI Symbol;Acc:MGI:1915545]	-	610	699	644	702	701	716	801	663	798	719	6.46127	7.465	6.73079	7.38218	6.42791	7.45318	8.41658	7.91707	7.90062	7.31286
ENSMUSG00000032946	2306.83	2385.41	1803.25	2391.94	1805.13	1932.83	1953.58	1036.15	1893.44	1457.35	2138.51	1654.67	0.369717	0.0405721	0.999545	Rasgrp2	19	6399340	6415216	+	12384	protein_coding	RAS, guanyl releasing protein 2 [Source:MGI Symbol;Acc:MGI:1333849]	-	2300	2374	1790	2371	2058	1955	1988	906	2001	1500	7.11154	7.40084	5.46111	7.27824	5.50864	5.9405	6.09771	3.15811	5.78299	4.45345
ENSMUSG00000090565	3.00891	7.03365	6.04442	9.0795	0	0	0.982685	3.43096	0	0.971567	5.03329	1.07704	2.2728	0.0406522	0.999545	4930405O22Rik	17	63305446	63312973	-	1012	sense_intronic	RIKEN cDNA 4930405O22 gene [Source:MGI Symbol;Acc:MGI:3041158]	-	3	7	6	9	0	0	1	3	0	1	0.113511	0.267041	0.224006	0.338079	0	0	0.0375345	0.127968	0	0.0363317
ENSMUSG00000055547	13.0386	3.01442	8.05922	0	5.26277	1.97732	0.982685	3.43096	0	0.971567	5.87501	1.47251	2.03047	0.0406716	0.999545	Apobec4	1	152750551	152757544	+	1566	protein_coding	apolipoprotein B mRNA editing enzyme, catalytic polypeptide-like 4 (putative) [Source:MGI Symbol;Acc:MGI:1918531]	-	13	3	8	0	6	2	1	3	0	1	0.317869	0.0739589	0.193013	0	0.127005	0.0480591	0.024256	0.0826969	0	0.0234787
ENSMUSG00000023935	71.2109	54.2596	42.3109	41.3622	54.382	73.1607	66.8226	76.6248	58.6673	76.7538	52.7051	70.4058	-0.415436	0.0407131	0.999545	Spats1	17	45440578	45475415	-	4856	protein_coding	spermatogenesis associated, serine-rich 1 [Source:MGI Symbol;Acc:MGI:1918270]	-	71	54	42	41	62	74	68	67	62	79	0.559856	0.429315	0.326783	0.320967	0.423227	0.573443	0.531915	0.595601	0.456962	0.598157
ENSMUSG00000106047	9.02674	7.03365	5.03701	1.00883	2.63139	1.97732	0	3.43096	0	0.971567	4.94752	1.27597	2.00013	0.0407592	0.999545	Gm42942	3	156703900	156705227	+	1328	TEC	predicted gene 42942 [Source:MGI Symbol;Acc:MGI:5663079]	-	9	7	5	1	3	2	0	3	0	1	0.259502	0.203498	0.142253	0.0286258	0.074883	0.0566721	0	0.0975175	0	0.0276865
ENSMUSG00000059201	0	0	0	0	0	1.97732	0	2.28731	0.946246	4.85784	0	2.01374	-3.48216	0.0407714	0.999545	Lep	6	29060220	29073877	+	3354	protein_coding	leptin [Source:MGI Symbol;Acc:MGI:104663]	-	0	0	0	0	0	2	0	2	1	5	0	0	0	0	0	0.022439	0	0.0257411	0.010671	0.0548117
ENSMUSG00000112269	0	0	1.0074	1.00883	0	2.96598	7.86148	1.14365	0.946246	0.971567	0.403247	2.77778	-2.79772	0.0407729	0.999545	Gm6906	10	25836687	25837255	+	569	processed_pseudogene	predicted gene 6906 [Source:MGI Symbol;Acc:MGI:3644963]	-	0	0	1	1	0	3	8	1	1	1	0	0	0.0664013	0.0668103	0	0.198402	0.534059	0.075866	0.0629005	0.0646181
ENSMUSG00000076006	25.0743	29.1394	2.01481	8.07066	22.8053	6.92061	12.7749	6.86192	6.62372	3.88627	17.4209	7.41349	1.23425	0.0407735	0.999545	Mir376c	12	109722718	109722803	+	86	miRNA	microRNA 376c [Source:MGI Symbol;Acc:MGI:3619381]	-	25	29	2	8	26	7	13	6	7	4	11.1311	13.0185	0.878659	3.53628	10.0216	3.06293	5.74191	3.0117	2.91317	1.71013
ENSMUSG00000116506	37.1099	33.1586	28.2073	38.3357	32.4538	17.7959	24.5671	28.5913	23.6562	24.2892	33.853	23.7799	0.513192	0.0407933	0.999545	5730414N17Rik	15	98872644	98874082	+	1439	lincRNA	RIKEN cDNA 5730414N17 gene [Source:MGI Symbol;Acc:MGI:1917774]	-	37	33	28	38	37	18	25	25	25	25	0.984549	0.885349	0.735167	1.00387	0.852317	0.470705	0.659919	0.749961	0.621793	0.638772
ENSMUSG00000097825	53.1574	42.2019	26.1925	43.3798	21.0511	63.2742	71.736	49.1771	42.5811	49.5499	37.1965	55.2637	-0.575918	0.0409599	0.999545	9630001P10Rik	5	45638699	45645469	+	4765	antisense	RIKEN cDNA 9630001P10 gene [Source:MGI Symbol;Acc:MGI:2441755]	-	53	42	26	43	24	64	73	43	45	51	0.425902	0.340289	0.206157	0.343053	0.166958	0.505422	0.581931	0.389552	0.338	0.393526
ENSMUSG00000107571	3.00891	12.0577	8.05922	27.2385	20.174	2.96598	2.94806	6.86192	7.56997	9.71567	14.1077	6.01232	1.2334	0.0411811	0.999545	Gm43877	6	46049158	46051395	+	2238	TEC	predicted gene, 43877 [Source:MGI Symbol;Acc:MGI:5690269]	-	3	12	8	27	23	3	3	6	8	10	0.0513284	0.207006	0.135057	0.458627	0.340665	0.0504427	0.0509182	0.115731	0.127937	0.164288
ENSMUSG00000036957	469.39	465.226	422.102	485.249	401.725	503.227	468.741	520.362	516.65	556.708	448.738	513.138	-0.194225	0.0414297	0.999545	Lrfn3	7	30355489	30362772	-	2886	protein_coding	leucine rich repeat and fibronectin type III domain containing 3 [Source:MGI Symbol;Acc:MGI:2442512]	-	468	463	419	481	458	509	477	455	546	573	6.20935	6.19364	5.48538	6.33584	5.26053	6.6368	6.27818	6.80573	6.77116	7.30003
ENSMUSG00000030766	488.447	450.153	518.812	458.01	405.233	416.225	378.334	337.378	467.446	349.764	464.131	389.829	0.25002	0.041537	0.999545	Arhgap17	7	123279218	123369915	-	9759	protein_coding	Rho GTPase activating protein 17 [Source:MGI Symbol;Acc:MGI:1917747]	-	487	448	515	454	462	421	385	295	494	360	1.91082	1.77229	1.99384	1.7685	1.56927	1.62336	1.49854	1.3049	1.81171	1.35632
ENSMUSG00000105153	4.01188	3.01442	2.01481	7.06183	2.63139	2.96598	0	0	0	0.971567	3.74687	0.787509	2.22893	0.0417116	0.999545	Gm3143	3	34699640	34716662	-	960	lincRNA	predicted gene 3143 [Source:MGI Symbol;Acc:MGI:3781322]	-	4	3	2	7	3	3	0	0	0	1	0.159546	0.120646	0.0787132	0.277193	0.103588	0.117595	0	0	0	0.0382997
ENSMUSG00000054892	1.00297	2.00961	1.0074	3.0265	0	9.88659	2.94806	1.14365	5.67748	4.85784	1.4093	4.90272	-1.8319	0.0417748	0.999545	Txk	5	72695978	72752777	-	10955	protein_coding	TXK tyrosine kinase [Source:MGI Symbol;Acc:MGI:102960]	-	1	2	1	3	0	10	3	1	6	5	0.0034953	0.00704821	0.00344887	0.0104103	0	0.0343498	0.0104021	0.00394046	0.0196022	0.0167812
ENSMUSG00000053985	281.835	292.399	302.221	319.8	332.432	263.972	246.654	282.482	277.25	258.437	305.737	265.759	0.203808	0.0417999	0.999545	Zfp14	7	30036359	30051380	-	3475	protein_coding	zinc finger protein 14 [Source:MGI Symbol;Acc:MGI:99160]	zf-C2H2	281	291	300	317	379	267	251	247	293	266	3.09634	3.23295	3.26178	3.46785	3.6153	2.8913	2.74366	3.06833	3.01772	2.81445
ENSMUSG00000038973	2.00594	0	3.02221	7.06183	5.26277	0.988659	0	1.14365	0.946246	0	3.47055	0.615712	2.5226	0.0418246	0.999545	Cldnd2	7	43440782	43443334	+	721	protein_coding	claudin domain containing 2 [Source:MGI Symbol;Acc:MGI:1921526]	-	2	0	3	7	6	1	0	1	1	0	0.106216	0	0.157208	0.369078	0.275852	0.0521917	0	0.0598721	0.04964	0
ENSMUSG00000056380	44.1307	17.0817	35.2591	27.2385	218.405	24.7165	17.6883	50.3207	15.1399	10.6872	68.423	23.7105	1.53422	0.0418442	0.999545	Gpr50	X	71663667	71669257	+	3069	protein_coding	G-protein-coupled receptor 50 [Source:MGI Symbol;Acc:MGI:1333877]	-	44	17	35	27	249	25	18	44	16	11	0.548975	0.213852	0.430883	0.334443	2.68944	0.306535	0.222786	0.618893	0.186591	0.131784
ENSMUSG00000081225	103.306	83.399	133.985	141.237	109.641	118.639	84.5109	74.3375	83.2697	62.1803	114.313	84.5875	0.433359	0.0419589	0.999545	Cyp2j12	4	96099318	96141152	-	1944	protein_coding	cytochrome P450, family 2, subfamily j, polypeptide 12 [Source:MGI Symbol;Acc:MGI:3717097]	-	103	83	133	140	125	120	86	65	88	64	2.02879	1.64833	2.5849	2.73771	2.13144	2.32285	1.6804	1.44337	1.62014	1.21046
ENSMUSG00000042228	86.2555	130.625	120.888	94.8303	93.8527	128.526	129.714	140.669	121.12	136.019	105.29	131.21	-0.317774	0.0419728	0.999545	Lyn	4	3678115	3813122	+	4073	protein_coding	LYN proto-oncogene, Src family tyrosine kinase [Source:MGI Symbol;Acc:MGI:96892]	-	86	130	120	94	107	130	132	123	128	140	0.808501	1.23223	1.11315	0.877342	0.870822	1.20106	1.23104	1.30362	1.12477	1.26381
ENSMUSG00000076613	0	0	12.0888	2.01767	0.877128	0	0	0	0	0	2.99673	0	4.01744	0.0420404	0.999545	Ighg2b	12	113302965	113307933	-	2678	IG_C_gene	immunoglobulin heavy constant gamma 2B [Source:MGI Symbol;Acc:MGI:96445]	-	0	0	12	2	1	0	0	0	0	0	0	0	0.169301	0.0283906	0.012378	0	0	0	0	0
ENSMUSG00000083964	18.0535	22.1058	12.0888	25.2208	19.2968	11.8639	7.86148	17.1548	13.2474	7.77254	19.3531	11.58	0.750781	0.0420833	0.999545	Gm14122	2	150398256	150399399	-	973	processed_pseudogene	predicted gene 14122 [Source:MGI Symbol;Acc:MGI:3651998]	-	18	22	12	25	22	12	8	15	14	8	0.708363	0.872913	0.465969	0.976748	0.749497	0.464093	0.312312	0.665484	0.51497	0.302304
ENSMUSG00000113514	1.00297	9.04326	3.02221	4.03533	1.75426	6.92061	18.671	8.00557	4.73123	8.7441	3.77161	9.41451	-1.3295	0.0421219	0.999545	Gm18960	13	93420604	93421316	-	713	processed_pseudogene	predicted gene, 18960 [Source:MGI Symbol;Acc:MGI:5011145]	-	1	9	3	4	2	7	19	7	5	9	0.053704	0.48732	0.158972	0.213268	0.0929823	0.369441	1.01222	0.423807	0.250985	0.464108
ENSMUSG00000019892	40.1188	43.2067	34.2517	19.1678	22.8053	51.4103	49.1343	32.0223	61.506	42.749	31.9101	47.3644	-0.576927	0.0421889	0.999545	Lrriq1	10	103046031	103236322	-	6449	protein_coding	leucine-rich repeats and IQ motif containing 1 [Source:MGI Symbol;Acc:MGI:1922228]	-	40	43	34	19	26	52	50	28	65	44	0.2375	0.257417	0.199194	0.112	0.133641	0.303423	0.294503	0.187424	0.360734	0.250857
ENSMUSG00000117251	0	0	0	0	0	0.988659	0	9.14923	3.78498	0	0	2.78457	-3.94093	0.042217	0.999545	AL805899.2	4	88995118	89039192	-	1332	lincRNA	novel transcript	-	0	0	0	0	0	1	0	8	4	0	0	0	0	0	0	0.0282509	0	0.259266	0.107479	0
ENSMUSG00000028681	81.2406	84.4038	57.422	98.8656	112.272	65.2515	55.0304	69.7629	75.6997	59.2656	86.8409	65.002	0.420973	0.0422585	0.999545	Ptch2	4	117096075	117116101	+	5974	protein_coding	patched 2 [Source:MGI Symbol;Acc:MGI:1095405]	-	81	84	57	98	128	66	56	61	80	61	0.519178	0.542844	0.360494	0.623615	0.710239	0.415734	0.356069	0.440782	0.479282	0.375432
ENSMUSG00000085847	1.00297	1.00481	1.0074	0	0	2.96598	2.94806	1.14365	3.78498	3.88627	0.603036	2.94579	-2.32888	0.0422667	0.999545	Gm14540	6	33038468	33043222	+	3261	antisense	predicted gene 14540 [Source:MGI Symbol;Acc:MGI:3705140]	-	1	1	1	0	0	3	3	1	4	4	0.0117421	0.0118389	0.0115861	0	0	0.0346184	0.0349448	0.0132376	0.0439011	0.0450999
ENSMUSG00000041161	213.633	211.009	155.14	155.36	143.849	168.072	271.221	253.891	218.583	213.745	175.798	225.102	-0.356917	0.0422729	0.999545	Otud3	4	138895379	138913945	-	1668	protein_coding	OTU domain containing 3 [Source:MGI Symbol;Acc:MGI:1920412]	-	213	210	154	154	164	170	276	222	231	220	4.88968	4.86054	3.4883	3.50978	3.25918	3.83522	6.28528	5.74535	4.95658	4.84946
ENSMUSG00000027544	373.105	490.346	526.872	520.558	699.071	465.658	419.607	431.157	388.907	391.542	521.99	419.374	0.316803	0.042401	0.999545	Nfatc2	2	168476410	168601657	-	10578	protein_coding	nuclear factor of activated T cells, cytoplasmic, calcineurin dependent 2 [Source:MGI Symbol;Acc:MGI:102463]	RHD	372	488	523	516	797	471	427	377	411	403	1.34659	1.78106	1.86804	1.85439	2.49755	1.67554	1.53333	1.5385	1.39061	1.40077
ENSMUSG00000055177	4.01188	3.01442	1.0074	4.03533	3.50851	7.90927	5.89611	2.28731	8.51622	13.6019	3.11551	7.64217	-1.30295	0.0424125	0.999545	Cstl1	2	148750358	148755433	+	722	protein_coding	cystatin-like 1 [Source:MGI Symbol;Acc:MGI:2652834]	-	4	3	1	4	4	8	6	2	9	14	0.212138	0.160415	0.0523301	0.21061	0.183647	0.416956	0.315664	0.119578	0.446141	0.712947
ENSMUSG00000040616	87.2584	85.4086	77.57	94.8303	116.658	54.3762	77.6321	62.9009	88.9471	68.9813	92.3451	70.5675	0.388109	0.0425227	0.999545	Tmem51	4	142030992	142084304	-	1875	protein_coding	transmembrane protein 51 [Source:MGI Symbol;Acc:MGI:2384874]	-	87	85	77	94	133	55	79	55	94	71	1.7767	1.75016	1.55159	1.90582	2.35131	1.10382	1.60043	1.26625	1.79429	1.39227
ENSMUSG00000042401	991.938	872.172	940.914	873.649	806.081	1049.96	1044.59	982.398	903.665	1465.12	896.951	1089.15	-0.280433	0.042646	0.999545	Crtac1	19	42283037	42431783	-	2616	protein_coding	cartilage acidic protein 1 [Source:MGI Symbol;Acc:MGI:1920082]	-	989	868	934	866	919	1062	1063	859	955	1508	14.4762	12.8098	13.4896	12.5845	11.645	15.2765	15.435	14.1747	13.0657	21.1948
ENSMUSG00000039512	642.904	625.995	584.294	567.973	709.597	585.286	585.68	546.666	509.08	493.556	626.152	544.054	0.203648	0.0426475	0.999545	Uhrf1bp1	17	27856441	27900041	+	8758	protein_coding	UHRF1 (ICBP90) binding protein 1 [Source:MGI Symbol;Acc:MGI:3041238]	-	641	623	580	563	809	592	596	478	538	508	2.80253	2.74628	2.50214	2.44376	3.06199	2.54363	2.58495	2.35604	2.19859	2.13268
ENSMUSG00000017204	0	2.00961	1.0074	2.01767	7.01703	0	0.982685	0	0	0	2.41034	0.196537	3.14273	0.0426628	0.999545	Gsdma	11	98664351	98677708	+	2726	protein_coding	gasdermin A [Source:MGI Symbol;Acc:MGI:1889509]	-	0	2	1	2	8	0	1	0	0	0	0	0.0283247	0.01386	0.0278907	0.0972801	0	0.0139343	0	0	0
ENSMUSG00000020022	678.008	687.288	1156.5	1578.82	1527.96	734.573	548.338	910.348	926.375	835.548	1125.72	791.037	0.509253	0.042684	0.999545	Ndufa12	10	94198720	94221443	+	1569	protein_coding	NADH:ubiquinone oxidoreductase subunit A12 [Source:MGI Symbol;Acc:MGI:1913664]	-	676	684	1148	1565	1742	743	558	796	979	860	16.4976	16.8304	27.6444	37.9181	36.8032	17.8198	13.509	21.9003	22.3319	20.1531
ENSMUSG00000048782	166.493	147.707	138.014	112.989	133.324	120.616	109.078	110.934	120.173	109.787	139.705	114.118	0.290899	0.0427792	0.999545	Insc	7	114743694	114850383	+	3722	protein_coding	INSC spindle orientation adaptor protein [Source:MGI Symbol;Acc:MGI:1917942]	-	166	147	137	112	152	122	111	97	127	113	1.70777	1.52476	1.3907	1.14392	1.35372	1.23345	1.13281	1.12501	1.22122	1.11627
ENSMUSG00000102538	0	4.01923	3.02221	2.01767	0.877128	0	0	0	0	0	1.98725	0	3.4232	0.042796	0.999545	Gm37230	9	108190531	108191348	-	818	TEC	predicted gene, 37230 [Source:MGI Symbol;Acc:MGI:5610458]	-	0	4	3	2	1	0	0	0	0	0	0	0.188785	0.138566	0.0929463	0.0405235	0	0	0	0	0
ENSMUSG00000086534	22.0654	26.125	29.2147	17.1502	17.5426	26.6938	20.6364	42.3152	37.8498	43.7205	22.4195	34.2431	-0.611871	0.0428003	0.999545	Gm16758	17	29890084	29897067	+	3848	processed_transcript	predicted gene, 16758 [Source:MGI Symbol;Acc:MGI:4439682]	-	22	26	29	17	20	27	21	37	40	45	0.218919	0.260855	0.284742	0.167946	0.172288	0.264038	0.207298	0.415075	0.372042	0.429976
ENSMUSG00000105119	1.00297	1.00481	0	0	0	3.95464	2.94806	0	10.4087	0	0.401556	3.46228	-3.12029	0.0428054	0.999545	Gm43765	3	126986808	126987700	-	893	TEC	predicted gene 43765 [Source:MGI Symbol;Acc:MGI:5663902]	-	1	1	0	0	0	4	3	0	11	0	0.042879	0.0432324	0	0	0	0.168557	0.127609	0	0.440867	0
ENSMUSG00000017677	2238.63	2334.17	2544.7	2743.02	4148.82	2444.95	1906.41	2314.75	2228.41	2176.31	2801.87	2214.17	0.339841	0.0428457	0.999545	Wsb1	11	79239372	79254671	-	3987	protein_coding	WD repeat and SOCS box-containing 1 [Source:MGI Symbol;Acc:MGI:1926139]	-	2232	2323	2526	2719	4730	2473	1940	2024	2355	2240	21.436	22.4939	23.9373	25.925	39.3256	23.3408	18.4828	21.9141	21.1403	20.6571
ENSMUSG00000111777	4.01188	2.00961	0	0	3.50851	4.94329	10.8095	6.86192	2.83874	4.85784	1.906	6.06227	-1.64762	0.042862	0.999545	Gm47147	9	98575308	98576766	-	1459	processed_pseudogene	predicted gene, 47147 [Source:MGI Symbol;Acc:MGI:6095911]	-	4	2	0	0	4	5	11	6	3	5	0.104979	0.052922	0	0	0.0908793	0.128959	0.286384	0.177523	0.0735923	0.126003
ENSMUSG00000028527	794.353	766.668	855.285	682.98	707.843	855.19	784.183	897.768	847.837	1283.44	761.426	933.683	-0.294453	0.0428909	0.999545	Ak4	4	101419277	101466995	+	4646	protein_coding	adenylate kinase 4 [Source:MGI Symbol;Acc:MGI:87979]	-	792	763	849	677	807	865	798	785	896	1321	6.52743	6.34025	6.90426	5.53943	5.75777	7.00606	6.52432	7.29373	6.90233	10.4542
ENSMUSG00000112969	7.02079	3.01442	6.04442	7.06183	7.89416	0.988659	4.91343	2.28731	1.89249	1.94313	6.20712	2.405	1.37168	0.0428932	0.999545	Gm48496	13	16431525	16431780	-	256	processed_pseudogene	predicted gene, 48496 [Source:MGI Symbol;Acc:MGI:6098022]	-	7	3	6	7	9	1	5	2	2	2	1.04702	0.452421	0.885523	1.03947	1.16537	0.146993	0.741894	0.337248	0.279613	0.287248
ENSMUSG00000022350	630.869	709.394	603.434	637.582	654.338	802.791	821.525	737.656	637.77	716.045	647.123	743.157	-0.1994	0.0429154	0.999545	Washc5	15	59331997	59374167	-	4244	protein_coding	WASH complex subunit 5 [Source:MGI Symbol;Acc:MGI:2146110]	-	629	706	599	632	746	812	836	645	674	737	5.67508	6.4223	5.33261	5.66105	5.82671	7.19975	7.48243	6.5606	5.68396	6.38497
ENSMUSG00000025930	9.02674	24.1154	13.0962	20.1767	11.4027	29.6598	39.3074	18.2985	25.5486	17.4882	15.5635	26.0605	-0.750525	0.0429371	0.999545	Msc	1	14753346	14755992	-	2546	protein_coding	musculin [Source:MGI Symbol;Acc:MGI:1333884]	bHLH	9	24	13	20	13	30	40	16	27	18	0.135357	0.363927	0.192918	0.298626	0.169256	0.443404	0.596779	0.271282	0.379553	0.259945
ENSMUSG00000108943	60.1782	61.2932	79.5848	67.5918	96.4841	66.2401	52.0823	53.7517	59.6135	38.8627	73.0264	54.1101	0.435585	0.0429531	0.999545	Gm44559	7	59262923	59263934	-	1012	TEC	predicted gene 44559 [Source:MGI Symbol;Acc:MGI:5753135]	-	60	61	79	67	110	67	53	47	63	40	2.27022	2.32708	2.94941	2.51681	3.60307	2.49133	1.98933	2.00483	2.22806	1.45327
ENSMUSG00000039405	171.508	146.702	145.066	175.537	90.3442	147.31	171.97	312.217	196.819	183.626	145.831	202.389	-0.472379	0.0429568	0.999545	Prss23	7	89507783	89527187	-	3767	protein_coding	protease, serine 23 [Source:MGI Symbol;Acc:MGI:1923703]	-	171	146	144	174	103	149	175	273	208	189	1.73819	1.4963	1.44429	1.75594	0.906362	1.48843	1.76463	3.12843	1.97622	1.84473
ENSMUSG00000026726	12.0356	11.0529	14.1036	34.3003	32.4538	9.88659	12.7749	11.4365	9.46246	13.6019	20.7892	11.4325	0.867911	0.0432434	0.999545	Cubn	2	13276338	13491813	-	14935	protein_coding	cubilin (intrinsic factor-cobalamin receptor) [Source:MGI Symbol;Acc:MGI:1931256]	-	12	11	14	34	37	10	13	10	10	14	0.0307661	0.0284347	0.035417	0.0865425	0.0821214	0.025196	0.0330636	0.0289038	0.0239641	0.0344659
ENSMUSG00000076441	534.583	620.971	505.716	608.326	1052.55	608.025	547.356	534.086	404.993	334.219	664.43	485.736	0.452755	0.0432593	0.999545	Ass1	2	31470207	31520672	+	2414	protein_coding	argininosuccinate synthetase 1 [Source:MGI Symbol;Acc:MGI:88090]	-	533	618	502	603	1200	615	557	467	428	344	8.45447	9.88354	7.85697	9.49589	16.478	9.58683	8.76455	8.35101	6.34561	5.23947
ENSMUSG00000111361	3.00891	4.01923	3.02221	9.0795	0.877128	0.988659	0	0	0	2.9147	4.00139	0.780672	2.32621	0.0432639	0.999545	Gm47445	10	34178235	34179928	-	1694	TEC	predicted gene, 47445 [Source:MGI Symbol;Acc:MGI:6096399]	-	3	4	3	9	1	1	0	0	0	3	0.0678117	0.0911607	0.0669108	0.201969	0.019568	0.0222138	0	0	0	0.065114
ENSMUSG00000102930	3.00891	2.00961	1.0074	3.0265	0.877128	0.988659	0	0	0	0	1.98591	0.197732	2.84271	0.0433089	0.999545	Gm38115	1	36913601	36916539	-	2413	sense_intronic	predicted gene, 38115 [Source:MGI Symbol;Acc:MGI:5611343]	-	3	2	1	3	1	1	0	0	0	0	0.0476059	0.0319988	0.0156578	0.0472628	0.0137373	0.0155948	0	0	0	0
ENSMUSG00000040323	15.0446	13.0625	8.05922	19.1678	10.5255	6.92061	3.93074	5.71827	4.73123	12.6304	13.1719	6.78624	0.951101	0.0433749	0.999545	Gm15429	1	161726242	161727489	-	798	processed_pseudogene	predicted pseudogene 15429 [Source:MGI Symbol;Acc:MGI:3642423]	-	15	13	8	19	12	7	4	5	5	13	0.719755	0.628929	0.37877	0.90512	0.498469	0.33009	0.190401	0.270475	0.224251	0.598973
ENSMUSG00000031958	336.998	340.63	329.421	446.913	495.578	298.575	301.684	336.234	348.219	309.93	389.908	318.928	0.291119	0.0434116	0.999545	Ldhd	8	111623785	111630374	-	5328	protein_coding	lactate dehydrogenase D [Source:MGI Symbol;Acc:MGI:106428]	-	336	339	327	443	565	302	307	294	368	319	2.41475	2.45639	2.31885	3.16079	3.51515	2.13295	2.1887	2.382	2.47201	2.20137
ENSMUSG00000069893	7.02079	6.02884	3.02221	3.0265	1.75426	8.89793	6.8788	6.86192	13.2474	8.7441	4.17052	8.92604	-1.11561	0.0434175	0.999545	9930111J21Rik1	11	48946150	48979398	-	4895	protein_coding	RIKEN cDNA 9930111J21 gene 1 [Source:MGI Symbol;Acc:MGI:3041173]	-	7	6	3	3	2	9	7	6	14	9	0.0547573	0.0473216	0.0231557	0.0232983	0.0135437	0.0691874	0.0543196	0.0529125	0.102363	0.0676015
ENSMUSG00000027355	38.1129	24.1154	20.1481	13.1148	10.5255	37.569	22.6018	24.0167	47.3123	48.5784	21.2033	36.0156	-0.772213	0.043447	0.999545	Tmco5	2	116878691	116892494	+	1228	protein_coding	transmembrane and coiled-coil domains 5 [Source:MGI Symbol;Acc:MGI:1914606]	-	38	24	20	13	12	38	23	21	50	50	1.1849	0.754526	0.615347	0.402439	0.323924	1.16445	0.711445	0.738211	1.45726	1.49706
ENSMUSG00000110637	24.0713	33.1586	25.1851	25.2208	26.3139	11.8639	21.6191	13.7238	19.8712	21.3745	26.7899	17.6905	0.592297	0.0434959	0.999545	Gm7807	8	20381081	20381658	+	578	processed_pseudogene	predicted gene 7807 [Source:MGI Symbol;Acc:MGI:3643361]	-	24	33	25	25	30	12	22	12	21	22	1.58994	2.20418	1.63418	1.64425	1.7205	0.781251	1.44579	0.896216	1.30034	1.39946
ENSMUSG00000047036	4803.23	4824.08	4526.26	4508.47	4767.19	4306.6	4391.62	4317.29	3978.02	4502.24	4685.85	4299.15	0.124333	0.0435364	0.999545	Zfp445	9	122844529	122866006	-	7409	protein_coding	zinc finger protein 445 [Source:MGI Symbol;Acc:MGI:2143340]	zf-C2H2	4789	4801	4493	4469	5435	4356	4469	3775	4204	4634	24.7504	25.0169	22.9121	22.9301	24.3164	22.1241	22.912	21.9946	20.3081	22.9966
ENSMUSG00000074619	6.01782	3.01442	1.0074	6.053	8.77128	0.988659	1.96537	3.43096	0.946246	0	4.97279	1.46625	1.80793	0.0436743	0.999545	1700034I23Rik	3	40900196	40902543	-	2348	protein_coding	RIKEN cDNA 1700034I23 gene [Source:MGI Symbol;Acc:MGI:1920547]	-	6	3	1	6	10	1	2	3	1	0	0.0978475	0.049327	0.0160913	0.0971424	0.141176	0.0160265	0.0323552	0.0551547	0.0152429	0
ENSMUSG00000048655	6.01782	13.0625	18.1333	12.106	11.4027	3.95464	9.82685	9.14923	4.73123	0.971567	12.1444	5.7267	1.09711	0.0437464	0.999545	Ccdc169	3	55137339	55172935	+	3334	protein_coding	coiled-coil domain containing 169 [Source:MGI Symbol;Acc:MGI:2444356]	-	6	13	18	12	13	4	10	8	5	1	0.06891	0.150536	0.203984	0.136827	0.129252	0.0451473	0.113932	0.103582	0.0536749	0.0110281
ENSMUSG00000113966	10.0297	13.0625	16.1184	10.0883	14.0341	1.97732	4.91343	8.00557	7.56997	10.6872	12.6666	6.6307	0.937402	0.0437661	0.999545	Gm47980	12	108960912	108963832	+	2921	TEC	predicted gene, 47980 [Source:MGI Symbol;Acc:MGI:6097267]	-	10	13	16	10	16	2	5	7	8	11	0.131089	0.17182	0.206956	0.130144	0.181572	0.0257653	0.0650205	0.103449	0.0980223	0.138461
ENSMUSG00000112666	46.1366	76.3653	70.5182	53.4682	192.968	65.2515	56.9957	49.1771	40.6886	54.4078	87.8913	53.3041	0.724733	0.0438061	0.999545	Gm48485	10	86657405	86671018	+	4227	lincRNA	predicted gene, 48485 [Source:MGI Symbol;Acc:MGI:6098005]	-	46	76	70	53	220	66	58	43	43	56	0.416699	0.694133	0.625683	0.47665	1.72524	0.587555	0.521204	0.439133	0.364085	0.487105
ENSMUSG00000020143	69.205	56.2692	64.4738	52.4593	57.0134	85.0247	86.4763	73.1938	55.8285	90.3557	59.8841	78.1758	-0.385194	0.0438656	0.999545	Dock2	11	34226815	34783892	-	11425	protein_coding	dedicator of cyto-kinesis 2 [Source:MGI Symbol;Acc:MGI:2149010]	-	69	56	64	52	65	86	88	64	59	93	0.231254	0.189231	0.211647	0.173023	0.188589	0.283256	0.292576	0.241815	0.184826	0.299291
ENSMUSG00000061013	281.835	288.38	293.154	346.03	277.173	195.754	284.979	288.201	217.637	238.034	297.314	244.921	0.280818	0.0439766	0.999545	Mkx	18	6910459	7004780	-	3925	protein_coding	mohawk homeobox [Source:MGI Symbol;Acc:MGI:2687286]	-	281	287	291	343	316	198	290	252	230	245	2.74134	2.82295	2.80119	3.32208	2.66875	1.89829	2.80653	2.77154	2.09727	2.29505
ENSMUSG00000017697	24.0713	14.0673	20.1481	46.4063	34.208	11.8639	14.7403	22.8731	21.7637	5.8294	27.7802	15.4141	0.856557	0.044019	0.999545	Ada	2	163726584	163750239	-	2002	protein_coding	adenosine deaminase [Source:MGI Symbol;Acc:MGI:87916]	-	24	14	20	46	39	12	15	20	23	6	0.459033	0.269976	0.377446	0.873473	0.645744	0.225556	0.284603	0.431246	0.411178	0.110193
ENSMUSG00000021743	452.34	364.745	324.384	320.809	123.675	320.325	372.438	580.976	476.908	613.059	317.19	472.741	-0.57622	0.0440238	0.999545	Fezf2	14	12342094	12348189	-	3047	protein_coding	Fez family zinc finger 2 [Source:MGI Symbol;Acc:MGI:1859823]	zf-C2H2	451	363	322	318	141	324	379	508	504	631	5.66762	4.59934	3.99275	3.96744	1.53393	4.00138	4.72474	7.19699	5.92004	7.61419
ENSMUSG00000112730	5.01485	4.01923	2.01481	0	2.63139	0.988659	0	0	0	0.971567	2.73605	0.392045	2.73458	0.0440291	0.999545	4930567K20Rik	10	10748930	10778370	+	1250	antisense	RIKEN cDNA 4930567K20 gene [Source:MGI Symbol;Acc:MGI:1925306]	-	5	4	2	0	3	1	0	0	0	1	0.153164	0.123541	0.0604517	0	0.0795557	0.0301042	0	0	0	0.0294142
ENSMUSG00000030774	6624.62	6430.76	5493.37	6607.86	5106.64	6538.99	7909.63	7022.03	6346.47	7339.22	6052.65	7031.27	-0.216279	0.0440958	0.999545	Pak1	7	97788541	97912381	+	3943	protein_coding	p21 (RAC1) activated kinase 1 [Source:MGI Symbol;Acc:MGI:1339975]	-	6605	6400	5453	6550	5822	6614	8049	6140	6707	7554	64.142	62.6635	52.2513	63.1495	48.9447	63.1211	77.5402	67.2204	60.8791	70.4396
ENSMUSG00000055560	36.1069	22.1058	17.1258	31.2738	11.4027	37.569	34.394	41.1715	29.3336	39.8342	23.603	36.4605	-0.632081	0.0440986	0.999545	Zfp459	13	67405709	67421418	-	3669	protein_coding	zinc finger protein 459 [Source:MGI Symbol;Acc:MGI:3040701]	zf-C2H2	36	22	17	31	13	38	35	36	31	41	0.375709	0.231492	0.175061	0.321196	0.117451	0.389738	0.362353	0.423559	0.302399	0.410868
ENSMUSG00000106490	0	2.00961	0	0	0	1.97732	6.8788	3.43096	0	2.9147	0.401923	3.04036	-2.92058	0.0442714	0.999545	Gm43283	3	123209400	123211947	-	2548	TEC	predicted gene 43283 [Source:MGI Symbol;Acc:MGI:5663420]	-	0	2	0	0	0	2	7	3	0	3	0	0.0303034	0	0	0	0.0295371	0.104354	0.0508255	0	0.0432901
ENSMUSG00000102997	32.0951	36.173	28.2073	21.1855	78.9416	21.7505	18.671	36.5969	23.6562	13.6019	39.3205	22.8553	0.794457	0.0443274	0.999545	Gm17244	4	123113349	123116764	-	3416	TEC	predicted gene, 17244 [Source:MGI Symbol;Acc:MGI:4936878]	-	32	36	28	21	90	22	19	32	25	14	0.358698	0.406861	0.309691	0.233699	0.873343	0.242349	0.211275	0.404382	0.261932	0.150687
ENSMUSG00000031953	111.33	102.49	140.029	96.848	135.078	93.9226	80.5802	100.641	88.9471	102.986	117.155	93.4155	0.329443	0.0443935	0.999545	Tmem170	8	111863038	111876750	-	3878	protein_coding	transmembrane protein 170 [Source:MGI Symbol;Acc:MGI:106426]	-	111	102	139	96	154	95	82	88	94	106	1.096	1.01544	1.35424	0.941064	1.31635	0.921834	0.803189	0.979568	0.867534	1.005
ENSMUSG00000029449	706.091	654.129	658.841	689.033	674.512	731.607	740.945	738.8	723.878	888.012	676.521	764.649	-0.176898	0.0444535	0.999545	Rhof	5	123103044	123132692	-	4602	protein_coding	ras homolog family member F (in filopodia) [Source:MGI Symbol;Acc:MGI:1345629]	-	704	651	654	683	769	740	754	646	765	914	5.85764	5.46129	5.36933	5.64196	5.53911	6.05093	6.22352	6.05962	5.94951	7.30241
ENSMUSG00000082812	2.00594	0	0	0	1.75426	10.8752	5.89611	2.28731	2.83874	0	0.75204	4.37948	-2.51497	0.0444749	0.999545	Gm14860	X	103514922	103515350	+	429	processed_pseudogene	predicted gene 14860 [Source:MGI Symbol;Acc:MGI:3801974]	-	2	0	0	0	2	11	6	2	3	0	0.178513	0	0	0	0.154537	0.964878	0.531258	0.201248	0.250283	0
ENSMUSG00000074452	8.02377	5.02403	4.02961	3.0265	0.877128	5.93195	13.7576	9.14923	12.3012	5.8294	4.19621	9.39387	-1.17875	0.0446408	0.999545	Pate2	9	35570284	35690318	+	4720	protein_coding	prostate and testis expressed 2 [Source:MGI Symbol;Acc:MGI:2685692]	-	8	5	4	3	1	6	14	8	13	6	0.0649	0.0408968	0.0320189	0.0241621	0.00702293	0.0478351	0.112667	0.0731657	0.0985753	0.0467386
ENSMUSG00000104897	15.0446	5.02403	12.0888	10.0883	2.63139	4.94329	3.93074	2.28731	2.83874	4.85784	8.97543	3.77158	1.23546	0.0446622	0.999545	Gm43203	3	35845342	35845899	+	558	TEC	predicted gene 43203 [Source:MGI Symbol;Acc:MGI:5663340]	-	15	5	12	10	3	5	4	2	3	5	1.02933	0.345937	0.812523	0.681273	0.178216	0.337189	0.272294	0.154723	0.192422	0.32946
ENSMUSG00000075324	148.44	205.985	235.732	151.325	251.736	225.414	106.13	77.7684	162.754	103.958	198.644	135.205	0.55401	0.0448151	0.999545	Fign	2	63971507	64098038	-	9969	protein_coding	fidgetin [Source:MGI Symbol;Acc:MGI:1890647]	-	148	205	234	150	287	228	108	68	172	107	0.568469	0.793896	0.886856	0.571999	0.954312	0.860637	0.411513	0.294454	0.617509	0.394638
ENSMUSG00000045287	1171.47	1081.17	1124.26	1018.92	503.472	1135.97	1414.08	1168.81	1257.56	1515.64	979.859	1298.41	-0.406555	0.0448276	0.999545	Rtn4rl1	11	75193783	75267769	+	3525	protein_coding	reticulon 4 receptor-like 1 [Source:MGI Symbol;Acc:MGI:2661375]	-	1168	1076	1116	1010	574	1149	1439	1022	1329	1560	12.6876	11.7846	11.9617	10.8923	5.39775	12.2659	15.5065	12.5156	13.4937	16.2717
ENSMUSG00000055200	35.104	27.1298	28.2073	43.3798	33.3309	44.4896	40.2901	45.7461	64.3447	38.8627	33.4303	46.7467	-0.485294	0.044957	0.999545	Sertad3	7	27473768	27477364	+	1329	protein_coding	SERTA domain containing 3 [Source:MGI Symbol;Acc:MGI:2180697]	-	35	27	28	43	38	45	41	40	68	40	1.00842	0.784332	0.796016	1.22998	0.947804	1.27416	1.17185	1.29926	1.83126	1.10663
ENSMUSG00000103116	3.00891	2.00961	1.0074	1.00883	2.63139	0	0.982685	0	0	0	1.93323	0.196537	2.8152	0.0449761	0.999545	4930539M17Rik	3	9061964	9071074	+	846	lincRNA	RIKEN cDNA 4930539M17 gene [Source:MGI Symbol;Acc:MGI:1922399]	-	3	2	1	1	3	0	1	0	0	0	0.135784	0.0912685	0.04466	0.044935	0.117547	0	0.0448995	0	0	0
ENSMUSG00000021228	55.1634	39.1875	40.2961	36.318	28.9452	60.3082	48.1516	51.4644	45.4198	70.9244	39.982	55.2537	-0.470947	0.0449873	0.999545	Acot3	12	84052144	84060402	+	3438	protein_coding	acyl-CoA thioesterase 3 [Source:MGI Symbol;Acc:MGI:2159619]	-	55	39	40	36	33	61	49	45	48	73	0.612567	0.437945	0.439585	0.398063	0.318177	0.667669	0.541379	0.565023	0.499692	0.780699
ENSMUSG00000097318	11.0327	11.0529	11.0814	7.06183	7.89416	4.94329	4.91343	3.43096	7.56997	2.9147	9.62459	4.75447	1.00456	0.0449997	0.999545	1700007L15Rik	16	33379854	33380727	-	738	bidirectional_promoter_lncRNA	RIKEN cDNA 1700007L15 gene [Source:MGI Symbol;Acc:MGI:1916581]	-	11	11	11	7	9	5	5	3	8	3	0.570733	0.575437	0.563151	0.360576	0.404246	0.254947	0.257351	0.175479	0.387972	0.149462
ENSMUSG00000112756	1.00297	6.02884	5.03701	2.01767	3.50851	3.95464	10.8095	13.7238	5.67748	7.77254	3.519	8.38761	-1.24342	0.0450155	0.999545	Gm48014	12	95724956	95726255	+	1300	TEC	predicted gene, 48014 [Source:MGI Symbol;Acc:MGI:6097321]	-	1	6	5	2	4	4	11	12	6	8	0.0294546	0.178184	0.145317	0.0584847	0.101994	0.115785	0.321411	0.398472	0.165186	0.226263
ENSMUSG00000055720	1073.18	1058.06	1040.65	1222.71	962.21	1168.59	1270.61	1204.27	1224.44	1158.11	1071.36	1205.2	-0.170268	0.0451064	0.999545	Ubl7	9	57910979	57929968	+	2402	protein_coding	ubiquitin-like 7 (bone marrow stromal cell-derived) [Source:MGI Symbol;Acc:MGI:1916709]	-	1070	1053	1033	1212	1097	1182	1293	1053	1294	1192	17.0572	16.9245	16.2486	19.1816	15.1389	18.5175	20.4474	18.9241	19.2809	18.2461
ENSMUSG00000074165	784.323	843.033	794.841	835.314	934.142	721.721	763.546	730.795	682.243	812.23	838.33	742.107	0.176415	0.0452414	0.999545	Zfp788	7	41633203	41651530	+	4346	protein_coding	zinc finger protein 788 [Source:MGI Symbol;Acc:MGI:1914857]	zf-C2H2	782	839	789	828	1065	730	777	639	721	836	6.88991	7.45304	6.85924	7.24263	8.12307	6.32077	6.79114	6.34703	5.93762	7.07266
ENSMUSG00000030757	897.659	878.201	893.566	935.188	1245.52	960.976	891.295	685.048	715.362	728.675	970.027	796.272	0.284971	0.0452835	0.999545	Zkscan2	7	123475384	123500449	-	8984	protein_coding	zinc finger with KRAB and SCAN domains 2 [Source:MGI Symbol;Acc:MGI:2444060]	zf-C2H2	895	874	887	927	1420	972	907	599	756	750	3.81461	3.7558	3.73029	3.92252	5.23936	4.0713	3.83486	2.87817	3.01175	3.06943
ENSMUSG00000001435	131.389	179.86	312.295	307.694	584.168	189.822	118.905	250.46	242.239	136.019	303.081	187.489	0.694166	0.0453268	0.999545	Col18a1	10	77052178	77166548	-	7021	protein_coding	collagen, type XVIII, alpha 1 [Source:MGI Symbol;Acc:MGI:88451]	-	131	179	310	305	666	192	121	219	256	140	0.714445	0.984272	1.66821	1.65142	3.14438	1.02906	0.654633	1.34649	1.30499	0.733155
ENSMUSG00000108601	53.1574	61.2932	51.3775	89.7861	75.4331	56.3535	38.3247	42.3152	53.936	51.4931	66.2095	48.4845	0.44858	0.0453345	0.999545	Gm44645	7	73422250	73423902	+	1653	TEC	predicted gene 44645 [Source:MGI Symbol;Acc:MGI:5753221]	-	53	61	51	89	86	57	39	37	57	53	1.22772	1.42468	1.1657	2.04679	1.72459	1.29759	0.896197	0.966247	1.23415	1.17888
ENSMUSG00000059439	786.329	750.591	730.367	724.342	556.099	871.008	948.291	736.513	775.922	855.951	709.546	837.537	-0.240238	0.0453968	0.999545	Bcas3	11	85353167	85826058	+	6085	protein_coding	breast carcinoma amplified sequence 3 [Source:MGI Symbol;Acc:MGI:2385848]	-	784	747	725	718	634	881	965	644	820	881	4.93346	4.73938	4.50159	4.48559	3.45373	5.44819	6.02391	4.56862	4.82303	5.32331
ENSMUSG00000040666	31.0921	24.1154	30.2221	27.2385	35.9623	21.7505	15.723	20.5858	28.3874	12.6304	29.7261	19.8154	0.587227	0.0454826	0.999545	Sh3bgr	16	96200450	96228935	+	1570	protein_coding	SH3-binding domain glutamic acid-rich protein [Source:MGI Symbol;Acc:MGI:1354740]	-	31	24	30	27	41	22	16	18	30	13	0.756064	0.590164	0.721955	0.653762	0.865654	0.527303	0.387108	0.494917	0.683893	0.304446
ENSMUSG00000026078	443.313	455.178	487.583	503.408	656.092	421.169	362.611	480.334	422.026	428.461	509.115	422.92	0.269246	0.0454982	0.999545	Pdcl3	1	38985608	38997238	+	4219	protein_coding	phosducin-like 3 [Source:MGI Symbol;Acc:MGI:1916083]	-	442	453	484	499	748	426	369	420	446	441	4.01152	4.14524	4.33435	4.49621	5.87695	3.79959	3.32222	4.29734	3.78348	3.84322
ENSMUSG00000078880	1.00297	4.01923	3.02221	3.0265	3.50851	7.90927	3.93074	12.5802	7.56997	3.88627	2.91588	7.17529	-1.28249	0.0455717	0.999545	Gm14308	2	176613364	176636344	-	3329	protein_coding	predicted gene 14308 [Source:MGI Symbol;Acc:MGI:3782921]	zf-C2H2	1	4	3	3	4	8	4	11	8	4	0.0115022	0.0463882	0.0340484	0.0342581	0.0398296	0.0904301	0.0456413	0.142639	0.0860088	0.0441787
ENSMUSG00000055471	185.55	243.163	204.503	213.873	287.698	234.312	168.039	180.697	158.969	161.28	226.957	180.66	0.330867	0.0455769	0.999545	Alk	17	71868972	72604627	-	7755	protein_coding	anaplastic lymphoma kinase [Source:MGI Symbol;Acc:MGI:103305]	-	185	242	203	212	328	237	171	158	168	166	0.913453	1.20474	0.989015	1.03923	1.40201	1.15002	0.837579	0.879498	0.775343	0.787033
ENSMUSG00000113688	22.0654	19.0913	16.1184	16.1413	16.6654	7.90927	16.7056	10.2929	9.46246	10.6872	18.0164	11.0115	0.708317	0.0456834	0.999545	A930027P06Rik	13	17951938	17954912	+	2975	TEC	RIKEN cDNA A930027P06 gene [Source:MGI Symbol;Acc:MGI:3026956]	-	22	19	16	16	19	8	17	9	10	11	0.28316	0.246563	0.203199	0.204451	0.211703	0.101191	0.217057	0.130592	0.120304	0.135948
ENSMUSG00000092241	9.02674	3.01442	2.01481	12.106	13.1569	11.8639	11.7922	18.2985	23.6562	13.6019	7.86378	15.8425	-1.00039	0.04573	0.999545	Gm20522	17	35122738	35126440	-	784	antisense	predicted gene 20522 [Source:MGI Symbol;Acc:MGI:5141987]	-	9	3	2	12	15	12	12	16	25	14	0.439565	0.147729	0.0963835	0.581863	0.634213	0.575973	0.581402	0.880975	1.14128	0.656566
ENSMUSG00000021506	7.02079	3.01442	2.01481	6.053	33.3309	3.95464	0.982685	3.43096	6.62372	0.971567	10.2868	3.19271	1.69686	0.0457716	0.999545	Pitx1	13	55825051	55836192	-	2656	protein_coding	paired-like homeodomain transcription factor 1 [Source:MGI Symbol;Acc:MGI:107374]	Homeobox	7	3	2	6	38	4	1	3	7	1	0.100917	0.0436068	0.0284505	0.0858774	0.474259	0.0566721	0.0143016	0.0487588	0.0943271	0.0138433
ENSMUSG00000046717	23.0683	14.0673	17.1258	4.03533	18.4197	8.89793	3.93074	6.86192	7.56997	11.6588	15.3433	7.78387	0.978691	0.0457812	0.999545	Igbp1b	6	138657089	138658544	-	1456	protein_coding	immunoglobulin (CD79A) binding protein 1b [Source:MGI Symbol;Acc:MGI:1354380]	-	23	14	17	4	21	9	4	6	8	12	0.604871	0.371217	0.44114	0.104437	0.478099	0.232605	0.104354	0.177889	0.196651	0.303031
ENSMUSG00000024846	78.2317	97.4663	51.3775	89.7861	85.0815	73.1607	99.2512	141.813	124.904	108.816	80.3886	109.589	-0.444781	0.0458463	0.999545	Cst6	19	5344705	5349574	-	3951	protein_coding	cystatin E/M [Source:MGI Symbol;Acc:MGI:1920970]	-	78	97	51	89	97	74	101	124	132	112	0.755934	0.94782	0.487699	0.856325	0.813813	0.704793	0.971015	1.3548	1.19573	1.04226
ENSMUSG00000068922	350.037	364.745	367.702	374.277	449.967	319.337	314.459	320.223	372.821	310.901	381.346	327.548	0.220132	0.0458481	0.999545	Msto1	3	88905107	88913999	-	5418	protein_coding	misato 1, mitochondrial distribution and morphology regulator [Source:MGI Symbol;Acc:MGI:2385175]	-	349	363	365	371	513	323	320	280	394	320	2.46651	2.5866	2.54532	2.6031	3.13862	2.24337	2.24348	2.23089	2.6027	2.17159
ENSMUSG00000030098	874.59	893.273	797.863	1037.08	1177.11	809.712	689.845	777.684	940.569	761.709	955.983	795.904	0.26465	0.0458552	0.999545	Grip2	6	91761509	91827250	-	9359	protein_coding	glutamate receptor interacting protein 2 [Source:MGI Symbol;Acc:MGI:2681173]	-	872	889	792	1028	1342	819	702	680	994	784	3.56766	3.66719	3.19731	4.1756	4.75317	3.293	2.84918	3.13645	3.80122	3.08002
ENSMUSG00000027639	429.271	404.937	431.168	467.09	542.943	397.441	388.161	418.577	379.445	382.797	455.082	393.284	0.212359	0.045953	0.999545	Samhd1	2	157097533	157135265	-	9150	protein_coding	SAM domain and HD domain, 1 [Source:MGI Symbol;Acc:MGI:1927468]	-	428	403	428	463	619	402	395	366	401	394	1.7911	1.70038	1.7673	1.9236	2.24249	1.65326	1.63979	1.72671	1.56852	1.58322
ENSMUSG00000023013	3.00891	0	9.06663	4.03533	2.63139	0	0.982685	2.28731	0	0	3.74845	0.653998	2.59046	0.0459557	0.999545	Aqp2	15	99579055	99584547	+	1419	protein_coding	aquaporin 2 [Source:MGI Symbol;Acc:MGI:1096865]	-	3	0	9	4	3	0	1	2	0	0	0.0809534	0	0.239634	0.10716	0.0700808	0	0.0267688	0.0608425	0	0
ENSMUSG00000031613	86.2555	92.4422	76.5626	70.6183	56.1362	120.616	86.4763	96.0669	101.248	87.441	76.403	98.3698	-0.36782	0.045964	0.999545	Hpgd	8	56294585	56321043	+	1683	protein_coding	hydroxyprostaglandin dehydrogenase 15 (NAD) [Source:MGI Symbol;Acc:MGI:108085]	-	86	92	76	70	64	122	88	84	107	90	1.95664	2.1104	1.70615	1.58114	1.26054	2.7278	1.98614	2.15454	2.27544	1.96619
ENSMUSG00000096296	11.0327	5.02403	7.05182	9.0795	20.174	4.94329	8.84417	2.28731	0	4.85784	10.4724	4.18652	1.32629	0.0460172	0.999545	Snord88c	7	44249852	44249941	+	90	snoRNA	small nucleolar RNA, C/D box 88C [Source:MGI Symbol;Acc:MGI:3819561]	-	11	5	7	9	23	5	9	2	0	5	4.68001	2.14481	2.93862	3.80151	8.47121	2.09057	3.7985	0.959284	0	2.04265
ENSMUSG00000068243	0	2.00961	0	1.00883	0.877128	0	4.91343	8.00557	1.89249	4.85784	0.779115	3.93387	-2.32182	0.0460776	0.999545	Gm7079	X	8047229	8047399	+	171	processed_pseudogene	predicted pseudogene 7079 [Source:MGI Symbol;Acc:MGI:3643105]	-	0	2	0	1	1	0	5	7	2	5	0	0.451539	0	0.22231	0.193849	0	1.11067	1.7671	0.418601	1.07508
ENSMUSG00000035394	11.0327	2.00961	25.1851	16.1413	19.2968	7.90927	4.91343	9.14923	4.73123	7.77254	14.7331	6.89514	1.10402	0.046143	0.999545	Cfap53	18	74283090	74359986	+	2600	protein_coding	cilia and flagella associated protein 53 [Source:MGI Symbol;Acc:MGI:1921703]	-	11	2	25	16	22	8	5	8	5	8	0.162	0.0296974	0.363292	0.233939	0.280485	0.115785	0.073048	0.132824	0.0688277	0.113131
ENSMUSG00000086512	5.01485	1.00481	3.02221	6.053	6.1399	1.97732	1.96537	1.14365	0.946246	0	4.24695	1.20652	1.82404	0.0461475	0.999545	Gm12600	4	87298362	87301270	+	708	lincRNA	predicted gene 12600 [Source:MGI Symbol;Acc:MGI:3651471]	-	5	1	3	6	7	2	2	1	1	0	0.270417	0.054529	0.160095	0.322161	0.327737	0.1063	0.107302	0.0609714	0.0505514	0
ENSMUSG00000020928	56.1664	58.2788	59.4368	57.5035	67.5389	46.467	30.4632	45.7461	58.6673	42.749	59.7849	44.8185	0.416456	0.0461888	0.999545	Higd1b	11	102835849	102838040	+	847	protein_coding	HIG1 domain family, member 1B [Source:MGI Symbol;Acc:MGI:1922939]	-	56	58	59	57	77	47	31	40	62	44	2.53164	2.64366	2.63183	2.55827	3.01347	2.0881	1.39024	2.03862	2.61984	1.91001
ENSMUSG00000001583	8.02377	2.00961	0	4.03533	8.77128	0	1.96537	0	1.89249	0.971567	4.568	0.965886	2.21905	0.0463342	0.999545	Tnk1	11	69851005	69858730	-	3329	protein_coding	tyrosine kinase, non-receptor, 1 [Source:MGI Symbol;Acc:MGI:1930958]	-	8	2	0	4	10	0	2	0	2	1	0.092018	0.0231941	0	0.0456774	0.0995741	0	0.0228206	0	0.0215022	0.0110447
ENSMUSG00000104878	0	2.00961	0	0	0	6.92061	0.982685	2.28731	5.67748	0	0.401923	3.17362	-2.98825	0.0464741	0.999545	Gm43567	5	85720774	85722751	+	1978	lincRNA	predicted gene 43567 [Source:MGI Symbol;Acc:MGI:5663704]	-	0	2	0	0	0	7	1	2	6	0	0	0.039036	0	0	0	0.133171	0.0192037	0.0436479	0.108565	0
ENSMUSG00000006218	99.2941	89.4278	107.792	87.7685	185.951	111.718	67.8053	91.4923	70.9685	35.948	114.047	75.5865	0.596918	0.0465494	0.999545	Fam131c	4	141368220	141384175	+	1433	protein_coding	family with sequence similarity 131, member C [Source:MGI Symbol;Acc:MGI:2685539]	-	99	89	107	87	212	113	69	80	75	37	2.64536	2.39776	2.82115	2.30796	4.90399	2.96735	1.829	2.40992	1.87319	0.949341
ENSMUSG00000107969	5.01485	2.00961	2.01481	5.04417	3.50851	0	1.96537	0	0	1.94313	3.51839	0.781701	2.14465	0.046568	0.999545	Gm44085	6	146992367	146994024	-	372	antisense	predicted gene, 44085 [Source:MGI Symbol;Acc:MGI:5690477]	-	5	2	2	5	4	0	2	0	0	2	0.514664	0.207562	0.203131	0.510955	0.356432	0	0.20422	0	0	0.197676
ENSMUSG00000039195	1483.39	1461.99	1020.5	1982.36	914.845	1260.54	1631.26	2441.7	2003.2	2009.2	1372.62	1869.18	-0.445515	0.0465936	0.999545	1110008P14Rik	2	32377097	32381938	-	2694	protein_coding	RIKEN cDNA 1110008P14 gene [Source:MGI Symbol;Acc:MGI:1920987]	-	1479	1455	1013	1965	1043	1275	1660	2135	2117	2068	21.0217	20.851	14.2069	27.7281	12.8335	17.8094	23.4057	34.2105	28.1248	28.2241
ENSMUSG00000001588	10.0297	4.01923	25.1851	10.0883	6.1399	3.95464	0	6.86192	7.56997	2.9147	11.0924	4.26025	1.38455	0.0468109	0.999545	Acap1	11	69881567	69895539	-	4878	protein_coding	ArfGAP with coiled-coil, ankyrin repeat and PH domains 1 [Source:MGI Symbol;Acc:MGI:2388270]	-	10	4	25	10	7	4	0	6	8	3	0.0784973	0.0316577	0.193636	0.0779316	0.0475682	0.0308571	0	0.0530969	0.0586969	0.0226124
ENSMUSG00000093629	71.2109	85.4086	53.3923	100.883	55.2591	42.5123	45.2035	58.3263	60.5598	59.2656	73.2308	53.1735	0.460249	0.046991	0.999545	Prox2os	12	85086374	85088228	+	1133	antisense	prospero homeobox 2 opposite strand [Source:MGI Symbol;Acc:MGI:5011542]	-	71	85	53	100	63	43	46	51	64	61	2.39952	2.89634	1.7674	3.35526	1.84319	1.42816	1.5422	1.94312	2.0217	1.97955
ENSMUSG00000078716	1536.55	1465.01	1558.45	1361.92	1432.35	1688.63	1689.24	1525.63	1584.96	1624.46	1470.86	1622.58	-0.141981	0.047196	0.999545	Tmem8b	4	43668971	43692668	+	5603	protein_coding	transmembrane protein 8B [Source:MGI Symbol;Acc:MGI:2441680]	-	1532	1458	1547	1350	1633	1708	1719	1334	1675	1672	10.4697	10.0461	10.4318	9.15944	9.66108	11.4711	11.6538	10.2777	10.6994	10.9719
ENSMUSG00000114511	3.00891	4.01923	7.05182	1.00883	6.1399	1.97732	2.94806	0	0	0	4.24574	0.985075	2.09607	0.04722	0.999545	0710001A04Rik	18	25713770	25719147	+	1345	antisense	RIKEN cDNA 0710001A04 gene [Source:MGI Symbol;Acc:MGI:1915652]	-	3	4	7	1	7	2	3	0	0	0	0.0854074	0.114815	0.196637	0.028264	0.172519	0.0559557	0.0847248	0	0	0
ENSMUSG00000113052	15.0446	10.0481	14.1036	17.1502	15.7883	24.7165	33.4113	19.4421	20.8174	15.5451	14.4269	22.7865	-0.659369	0.0474181	0.999545	Gm31513	12	84195969	84199580	+	684	antisense	predicted gene, 31513 [Source:MGI Symbol;Acc:MGI:5590672]	-	15	10	14	17	18	25	34	17	22	16	0.839714	0.564423	0.773322	0.944818	0.872321	1.37537	1.88814	1.07288	1.15115	0.860063
ENSMUSG00000114917	8.02377	0	5.03701	0	3.50851	0.988659	0.982685	0	0	0	3.31386	0.394269	3.01149	0.0476982	0.999545	Gm48250	13	46881027	46884898	+	771	antisense	predicted gene, 48250 [Source:MGI Symbol;Acc:MGI:6097663]	-	8	0	5	0	4	1	1	0	0	0	0.397312	0	0.245022	0	0.171975	0.0488071	0.0492671	0	0	0
ENSMUSG00000027350	6982.68	6555.36	7867.82	6730.93	5393.46	6909.74	7162.79	8707.78	8218.15	8415.71	6706.05	7882.83	-0.233286	0.0477711	0.999545	Chgb	2	132781278	132795079	+	2740	protein_coding	chromogranin B [Source:MGI Symbol;Acc:MGI:88395]	-	6962	6524	7810	6672	6149	6989	7289	7614	8685	8662	97.2926	91.9231	107.693	92.568	74.3899	95.9846	101.048	119.956	113.445	116.234
ENSMUSG00000038146	402.191	379.817	421.094	551.832	552.591	464.67	310.529	353.389	411.617	246.778	461.505	357.396	0.36915	0.0478179	0.999545	Notch3	17	32120820	32166880	-	8044	protein_coding	notch 3 [Source:MGI Symbol;Acc:MGI:99460]	-	401	378	418	547	630	470	316	309	435	254	1.90884	1.81418	1.96333	2.58506	2.59614	2.19868	1.4922	1.65823	1.93546	1.16099
ENSMUSG00000039763	226.671	173.832	207.525	178.563	226.299	245.187	279.083	239.024	211.013	239.005	202.578	242.662	-0.259237	0.0478288	0.999545	Dnajc28	16	91614254	91619026	-	3565	protein_coding	DnaJ heat shock protein family (Hsp40) member C28 [Source:MGI Symbol;Acc:MGI:2181053]	-	226	173	206	177	258	248	284	209	223	246	2.42742	1.87347	2.18321	1.88742	2.39894	2.61776	3.02601	2.53073	2.23878	2.53713
ENSMUSG00000109963	1.00297	0	1.0074	2.01767	2.63139	2.96598	4.91343	2.28731	5.67748	5.8294	1.33189	4.33472	-1.68756	0.0479287	0.999545	Gm45635	8	58246587	58248720	+	2134	TEC	predicted gene 45635 [Source:MGI Symbol;Acc:MGI:5791471]	-	1	0	1	2	3	3	5	2	6	6	0.0179433	0	0.0177049	0.035628	0.0466001	0.052901	0.0889994	0.0404571	0.100629	0.103377
ENSMUSG00000111446	0	0	0	1.00883	1.75426	1.97732	1.96537	2.28731	5.67748	2.9147	0.552618	2.96443	-2.37058	0.047945	0.999545	Gm6581	9	22092513	22092772	+	260	processed_pseudogene	predicted gene 6581 [Source:MGI Symbol;Acc:MGI:3648298]	-	0	0	0	1	2	2	2	2	6	3	0	0	0	0.146212	0.254986	0.289463	0.292192	0.33206	0.825932	0.424243
ENSMUSG00000018574	463.372	432.067	531.909	515.514	578.028	417.214	365.559	511.213	452.306	346.849	504.178	418.628	0.269783	0.0479745	0.999545	Acadvl	11	70010183	70015411	-	2686	protein_coding	acyl-Coenzyme A dehydrogenase, very long chain [Source:MGI Symbol;Acc:MGI:895149]	-	462	430	528	511	659	422	372	447	478	357	6.58616	6.1805	7.42705	7.2322	8.13279	5.91212	5.26076	7.18391	6.36925	4.88685
ENSMUSG00000046897	1650.89	1459.98	1705.53	1823.97	1925.3	1529.46	1348.24	1670.88	1502.64	1395.17	1713.13	1489.28	0.202542	0.0480124	0.999545	Zfp740	15	102203249	102215606	+	5091	protein_coding	zinc finger protein 740 [Source:MGI Symbol;Acc:MGI:1915994]	zf-C2H2	1646	1453	1693	1808	2195	1547	1372	1461	1588	1436	12.3801	11.0185	12.5644	13.5005	14.2919	11.4347	10.2368	12.3882	11.1639	10.3709
ENSMUSG00000059187	632.874	542.596	480.531	436.825	216.651	590.229	519.84	534.086	694.545	919.102	461.895	651.561	-0.497097	0.0481202	0.999545	Fam19a1	6	96113154	96657198	+	4214	protein_coding	family with sequence similarity 19, member A1 [Source:MGI Symbol;Acc:MGI:2443695]	-	631	540	477	433	247	597	529	467	734	946	5.73365	4.94721	4.27674	3.90615	1.94295	5.3311	4.7684	4.7839	6.23402	8.25397
ENSMUSG00000106294	0	9.04326	5.03701	3.0265	0.877128	0	0.982685	1.14365	0.946246	0	3.59678	0.614517	2.56325	0.0482576	0.999545	Gm8539	5	21613994	21614494	-	501	processed_pseudogene	predicted gene 8539 [Source:MGI Symbol;Acc:MGI:3779802]	-	0	9	5	3	1	0	1	1	1	0	0	0.693531	0.377069	0.227635	0.0661641	0	0.0758183	0.0861632	0.0714379	0
ENSMUSG00000107374	13.0386	24.1154	31.2295	32.2827	24.5596	36.5804	37.342	37.7406	35.9574	33.0333	25.0451	36.1307	-0.52854	0.0482704	0.999545	Gm43172	5	93090994	93093130	+	2137	TEC	predicted gene 43172 [Source:MGI Symbol;Acc:MGI:5663309]	-	13	24	31	32	28	37	38	33	38	34	0.232935	0.433579	0.548082	0.569247	0.434324	0.65153	0.675446	0.666606	0.636423	0.58498
ENSMUSG00000081238	12.0356	4.01923	0	4.03533	6.1399	0	3.93074	1.14365	0	0	5.24602	1.01488	2.3794	0.0483352	0.999545	Gm15836	14	57435721	57436513	-	793	processed_pseudogene	predicted gene 15836 [Source:MGI Symbol;Acc:MGI:3801924]	-	12	4	0	4	7	0	4	1	0	0	0.579435	0.194737	0	0.191753	0.292607	0	0.191601	0.054436	0	0
ENSMUSG00000090122	97.2882	122.586	84.6218	98.8656	174.549	101.832	85.4936	94.9232	80.4309	61.2087	115.582	84.7777	0.451215	0.0483574	0.999545	Kcne1l	X	142304752	142306294	-	1543	protein_coding	potassium voltage-gated channel, Isk-related family, member 1-like, pseudogene [Source:MGI Symbol;Acc:MGI:1913490]	-	97	122	84	98	199	103	87	83	85	63	2.40715	3.0525	2.05685	2.41444	4.27511	2.51193	2.14173	2.32205	1.9716	1.50121
ENSMUSG00000037188	27.0802	12.0577	7.05182	8.07066	4.38564	18.7845	25.5498	16.0111	22.7099	25.2607	11.7292	21.6632	-0.895006	0.0484272	0.999545	Grhl3	4	135541888	135573630	-	2789	protein_coding	grainyhead like transcription factor 3 [Source:MGI Symbol;Acc:MGI:2655333]	CP2	27	12	7	8	5	19	26	14	24	26	0.370691	0.166109	0.0948283	0.109043	0.0594267	0.256355	0.354109	0.21669	0.307985	0.342761
ENSMUSG00000079036	360.066	330.581	404.976	334.933	376.288	309.45	309.546	280.195	327.401	339.077	361.369	313.134	0.205699	0.0485053	0.999545	Alkbh1	12	87425840	87444017	-	6574	protein_coding	alkB homolog 1, histone H2A dioxygenase [Source:MGI Symbol;Acc:MGI:2384034]	-	359	329	402	332	429	313	315	245	346	349	2.09103	1.93209	2.31039	1.91984	2.16316	1.79164	1.82009	1.60878	1.88371	1.95192
ENSMUSG00000098950	0	0	0	0	0	4.94329	2.94806	0	3.78498	0	0	2.33527	-3.70301	0.0486373	0.999545	Gm28036	2	156071845	156127092	-	5823	protein_coding	predicted gene, 28036 [Source:MGI Symbol;Acc:MGI:5547772]	-	0	0	0	0	0	5	3	0	4	0	0	0	0	0	0	0.0323117	0.0195698	0	0.0245855	0
ENSMUSG00000110962	3.00891	1.00481	5.03701	1.00883	0	0	0	0	0	0	2.01191	0	3.43863	0.0487057	0.999545	Gm47062	9	120580135	120582738	+	1078	unprocessed_pseudogene	predicted gene, 47062 [Source:MGI Symbol;Acc:MGI:6095773]	-	3	1	5	1	0	0	0	0	0	0	0.106561	0.0358131	0.175243	0.0352644	0	0	0	0	0	0
ENSMUSG00000070469	25.0743	14.0673	17.1258	24.212	39.4708	13.8412	21.6191	5.71827	17.9787	7.77254	23.99	13.386	0.837932	0.0487111	0.999545	Adamtsl3	7	82335694	82614450	+	7744	protein_coding	ADAMTS-like 3 [Source:MGI Symbol;Acc:MGI:3028499]	-	25	14	17	24	45	14	22	5	19	8	0.123615	0.0697949	0.0829416	0.117815	0.192623	0.0680299	0.107912	0.0278717	0.0878122	0.0379832
ENSMUSG00000028030	569.687	516.471	604.442	561.92	435.056	649.549	602.386	583.263	622.63	650.95	537.515	621.756	-0.21135	0.048815	0.999545	Tbck	3	132684144	132841688	+	12127	protein_coding	TBC1 domain containing kinase [Source:MGI Symbol;Acc:MGI:2445052]	-	568	514	600	557	496	657	613	510	658	670	1.79346	1.63633	1.86933	1.74605	1.35578	2.03868	1.92008	1.81542	1.94195	2.03136
ENSMUSG00000020673	18.0535	16.0769	13.0962	22.1943	22.8053	10.8752	12.7749	13.7238	12.3012	7.77254	18.4453	11.4895	0.691239	0.0489403	0.999545	Tpo	12	30054659	30132624	-	3915	protein_coding	thyroid peroxidase [Source:MGI Symbol;Acc:MGI:98813]	-	18	16	13	22	26	11	13	12	13	8	0.17605	0.157779	0.125459	0.213622	0.220141	0.10573	0.126131	0.132315	0.118844	0.075132
ENSMUSG00000089744	1.00297	3.01442	0	0	0	3.95464	2.94806	3.43096	2.83874	3.88627	0.803478	3.41173	-2.11101	0.0489872	0.999545	Gm16146	18	84858636	84859547	-	439	antisense	predicted gene 16146 [Source:MGI Symbol;Acc:MGI:3801801]	-	1	3	0	0	0	4	3	3	3	4	0.0872232	0.263826	0	0	0	0.342872	0.259578	0.294996	0.244581	0.335013
ENSMUSG00000101102	15.0446	10.0481	10.074	2.01767	7.89416	0.988659	5.89611	4.57461	4.73123	2.9147	9.0157	3.82106	1.24012	0.0489961	0.999545	Gm28609	1	133050128	133068405	-	463	antisense	predicted gene 28609 [Source:MGI Symbol;Acc:MGI:5579315]	-	15	10	10	2	9	1	6	4	5	3	1.24053	0.833835	0.816033	0.164212	0.64435	0.0812748	0.492246	0.37294	0.386505	0.238236
ENSMUSG00000083935	10.0297	14.0673	6.04442	3.0265	3.50851	1.97732	5.89611	1.14365	2.83874	1.94313	7.33529	2.75979	1.39227	0.0490325	0.999545	Gm12294	11	65037052	65037541	-	490	processed_pseudogene	predicted gene 12294 [Source:MGI Symbol;Acc:MGI:3649526]	-	10	14	6	3	4	2	6	1	3	2	0.781449	1.10304	0.462641	0.232745	0.270598	0.153593	0.465122	0.0880975	0.219125	0.150072
ENSMUSG00000037989	2973.81	3136	3059.48	3096.11	2928.73	3243.79	3353.9	3379.5	3111.26	3326.65	3038.83	3283.02	-0.11148	0.0490567	0.999545	Wnk2	13	49036303	49148014	-	8481	protein_coding	WNK lysine deficient protein kinase 2 [Source:MGI Symbol;Acc:MGI:1922857]	-	2965	3121	3037	3069	3339	3281	3413	2955	3288	3424	13.3867	14.2072	13.5296	13.7564	13.0506	14.5578	15.2862	15.0408	13.8756	14.8441
ENSMUSG00000102728	1.00297	0	0	0	0	0.988659	4.91343	0	2.83874	1.94313	0.200594	2.13679	-3.00323	0.0490989	0.999545	Gm37934	1	111833823	111834224	+	402	TEC	predicted gene, 37934 [Source:MGI Symbol;Acc:MGI:5611162]	-	1	0	0	0	0	1	5	0	3	2	0.0952512	0	0	0	0	0.0936076	0.47245	0	0.267093	0.182924
ENSMUSG00000055102	1.00297	2.00961	1.0074	0	0	4.94329	0.982685	4.57461	1.89249	4.85784	0.803997	3.45018	-2.12126	0.0491776	0.999545	Zfp819	7	43607169	43618285	+	2466	protein_coding	zinc finger protein 819 [Source:MGI Symbol;Acc:MGI:1921650]	zf-C2H2	1	2	1	0	0	5	1	4	2	5	0.0155276	0.0313111	0.0153213	0	0	0.0762981	0.0154035	0.0700207	0.0290271	0.0745493
ENSMUSG00000021218	3328.86	3521.85	3594.41	3540	3608.51	4030.76	3935.65	3514.45	3786.88	3953.31	3518.72	3844.21	-0.12778	0.0491832	0.999545	Gdi2	13	3538063	3567871	+	10558	protein_coding	guanosine diphosphate (GDP) dissociation inhibitor 2 [Source:MGI Symbol;Acc:MGI:99845]	-	3319	3505	3568	3509	4114	4077	4005	3073	4002	4069	12.0371	12.8164	12.7683	12.6345	12.9164	14.531	14.409	12.5644	13.5663	14.1701
ENSMUSG00000085372	0	1.00481	1.0074	0	0	6.92061	3.93074	1.14365	1.89249	0	0.402442	2.7775	-2.79711	0.0491847	0.999545	Gm16145	10	63353853	63366887	+	583	antisense	predicted gene 16145 [Source:MGI Symbol;Acc:MGI:3802016]	-	0	1	1	0	0	7	4	1	2	0	0	0.0662205	0.0648067	0	0	0.451821	0.260617	0.0740442	0.12278	0
ENSMUSG00000108584	10.0297	22.1058	16.1184	11.0972	6.1399	19.7732	19.6537	13.7238	35.0111	24.2892	13.0982	22.4902	-0.793222	0.0492625	0.999545	Gm45216	6	91522409	91532379	+	600	sense_overlapping	predicted gene 45216 [Source:MGI Symbol;Acc:MGI:5753792]	-	10	22	16	11	7	20	20	12	37	25	0.638183	1.41557	1.00753	0.696943	0.386729	1.25434	1.26617	0.863355	2.20707	1.53199
ENSMUSG00000108772	2.00594	10.0481	11.0814	4.03533	4.38564	9.88659	16.7056	13.7238	8.51622	13.6019	6.31128	12.4868	-0.987909	0.0492659	0.999545	Gm6063	6	71641612	71642096	-	485	processed_pseudogene	predicted gene 6063 [Source:MGI Symbol;Acc:MGI:3645395]	-	2	10	11	4	5	10	17	12	9	14	0.157901	0.796012	0.856919	0.313526	0.341734	0.775881	1.33143	1.06807	0.664152	1.06134
ENSMUSG00000026458	2035.03	2108.08	2272.7	1971.26	2787.51	2081.13	1921.15	1935.06	1873.57	1809.06	2234.92	1923.99	0.216433	0.0493676	0.999545	Ppfia4	1	134296783	134332928	-	6572	protein_coding	protein tyrosine phosphatase, receptor type, f polypeptide (PTPRF), interacting protein (liprin), alpha 4 [Source:MGI Symbol;Acc:MGI:1915757]	-	2029	2098	2256	1954	3178	2105	1955	1692	1980	1862	11.8217	12.3245	12.9697	11.3027	16.0294	12.0529	11.2995	11.1138	10.7829	10.4171
ENSMUSG00000079460	2.00594	2.00961	3.02221	3.0265	16.6654	2.96598	0	2.28731	0.946246	0.971567	5.34594	1.43422	1.93087	0.0494439	0.999545	4933403O08Rik	X	112239049	112243852	+	1540	protein_coding	RIKEN cDNA 4933403O08 gene [Source:MGI Symbol;Acc:MGI:1918280]	-	2	2	3	3	19	3	0	2	1	1	0.0497285	0.0501384	0.0736019	0.0740553	0.408971	0.0733057	0	0.056062	0.0232405	0.0238751
ENSMUSG00000044037	369.093	381.827	449.302	506.434	800.818	390.52	241.741	371.687	475.962	347.821	501.495	365.546	0.45677	0.049467	0.999545	Als2cl	9	110879870	110900530	+	5883	protein_coding	ALS2 C-terminal like [Source:MGI Symbol;Acc:MGI:2447532]	-	368	380	446	502	913	395	246	325	503	358	2.39522	2.49371	2.86434	3.24385	5.14437	2.52659	1.58836	2.38476	3.0601	2.23744
ENSMUSG00000020092	272.808	262.255	290.132	288.526	336.817	230.357	229.948	272.19	266.841	243.863	290.108	248.64	0.224733	0.0495213	0.999545	Pald1	10	61319656	61383530	-	4535	protein_coding	phosphatase domain containing, paladin 1 [Source:MGI Symbol;Acc:MGI:1351623]	-	272	261	288	286	384	233	234	238	282	251	2.29661	2.2219	2.39941	2.39742	2.80682	1.93337	1.95997	2.26547	2.22556	2.03499
ENSMUSG00000026709	268.796	289.384	314.31	276.42	207.002	368.77	307.58	284.77	301.853	385.712	271.183	329.737	-0.284047	0.0495986	0.999545	Dars2	1	161040601	161070658	-	5195	protein_coding	aspartyl-tRNA synthetase 2 (mitochondrial) [Source:MGI Symbol;Acc:MGI:2442510]	-	268	288	312	274	236	373	313	249	319	397	1.97536	2.14027	2.26912	2.00503	1.50587	2.70184	2.2886	2.06906	2.19772	2.80977
ENSMUSG00000020738	1315.9	194.933	166.221	598.238	530.663	199.709	192.606	346.527	159.916	382.797	561.19	256.311	1.13077	0.0496724	0.999545	Sumo2	11	115523102	115536276	-	1736	protein_coding	small ubiquitin-like modifier 2 [Source:MGI Symbol;Acc:MGI:2158813]	-	1312	194	165	593	605	202	196	303	169	394	28.9388	4.31433	3.59106	12.9856	11.5522	4.37863	4.28862	7.53446	3.4842	8.34474
ENSMUSG00000021086	1.00297	6.02884	0	0	0	5.93195	8.84417	3.43096	3.78498	4.85784	1.40636	5.36998	-1.95379	0.0497017	0.999545	Ccdc175	12	72101300	72185029	-	2622	protein_coding	coiled-coil domain containing 175 [Source:MGI Symbol;Acc:MGI:1921186]	-	1	6	0	0	0	6	9	3	4	5	0.0146037	0.0883445	0	0	0	0.0861104	0.130383	0.049391	0.0546002	0.0701139
ENSMUSG00000047061	3.00891	7.03365	0	1.00883	0.877128	0	0.982685	0	0	0	2.3857	0.196537	3.1097	0.0497594	0.999545	Gm9817	13	45078692	45081222	+	2531	protein_coding	predicted gene 9817 [Source:MGI Symbol;Acc:MGI:3809102]	-	3	7	0	1	1	0	1	0	0	0	0.0453864	0.106774	0	0.0150198	0.0130969	0	0.0150079	0	0	0
ENSMUSG00000057766	296.879	375.798	363.672	289.535	226.299	373.713	415.676	397.991	318.885	404.172	310.437	382.087	-0.300431	0.0498486	0.999545	Ankrd29	18	12252362	12305720	-	3295	protein_coding	ankyrin repeat domain 29 [Source:MGI Symbol;Acc:MGI:2687055]	-	296	374	361	287	258	378	423	348	337	416	3.4398	4.38205	4.13943	3.31117	2.59552	4.31691	4.87637	4.55914	3.66051	4.64199

## Sheet: iWAT
gene_id	iW1KOSFN	iW2KOSFN	iW3KOSFN	iW4KOSFN	iW5KOSFN	iW6_KO_C	iW7_KO_C	iW8_KO_C	iW9_KO_C	iW10_KO_C	iWKOSFN	iW_KO_C	log2FoldChange	pvalue	padj	gene_name	gene_chr	gene_start	gene_end	gene_strand	gene_length	gene_biotype	gene_description	tf_family	iW1KOSFN_count	iW2KOSFN_count	iW3KOSFN_count	iW4KOSFN_count	iW5KOSFN_count	iW6_KO_C_count	iW7_KO_C_count	iW8_KO_C_count	iW9_KO_C_count	iW10_KO_C_count	iW1KOSFN_fpkm	iW2KOSFN_fpkm	iW3KOSFN_fpkm	iW4KOSFN_fpkm	iW5KOSFN_fpkm	iW6_KO_C_fpkm	iW7_KO_C_fpkm	iW8_KO_C_fpkm	iW9_KO_C_fpkm	iW10_KO_C_fpkm
ENSMUSG00000012889	26.2534	35.7046	27.093	27.2403	17.8871	101.983	109.987	154.01	66.6626	169.377	26.8357	120.404	-2.16366	7.82e-11	1.49e-06	Podnl1	8	84125989	84132527	+	3549	protein_coding	podocan-like 1 [Source:MGI Symbol;Acc:MGI:2685352]	-	19	33	40	26	16	105	126	166	67	161	0.301181	0.409	0.295329	0.30359	0.19914	1.12719	1.25127	1.71913	0.730247	1.95806
ENSMUSG00000076928	109.159	95.2123	54.1859	66.0053	126.328	625.499	362.26	981.583	148.25	571.253	90.178	537.769	-2.5802	1.51e-10	1.49e-06	Trac	14	54220521	54224206	+	935	TR_C_gene	T cell receptor alpha constant [Source:MGI Symbol;Acc:MGI:4439838]	-	79	88	80	63	113	644	415	1058	149	543	4.7533	4.13987	2.24197	2.79221	5.3384	26.2415	15.6431	41.5891	6.16419	25.0666
ENSMUSG00000030091	172.719	124.425	158.494	276.593	177.754	728.453	510.655	423.992	539.271	330.338	181.997	506.542	-1.47728	1.97e-08	0.000129849	Nup210	6	91013068	91116829	-	10474	protein_coding	nucleoporin 210 [Source:MGI Symbol;Acc:MGI:1859555]	-	125	115	234	264	159	750	585	457	542	314	0.671394	0.482949	0.585404	1.04451	0.670547	2.72812	1.96847	1.60365	2.00165	1.29397
ENSMUSG00000007107	70.4695	64.9175	58.9272	82.7685	124.092	210.766	371.862	260.704	138.3	266.164	80.235	249.559	-1.64068	5.96e-08	0.00029372	Atp1a4	1	172223513	172258414	-	3667	protein_coding	ATPase, Na+/K+ transporting, alpha 4 polypeptide [Source:MGI Symbol;Acc:MGI:1351335]	-	51	60	87	79	111	217	426	281	139	253	0.782419	0.719707	0.621671	0.892763	1.33708	2.25457	4.09435	2.81644	1.46624	2.97794
ENSMUSG00000043931	11.054	8.65567	8.12789	11.5247	10.0615	326.347	41.027	23.1943	32.8338	105.203	9.88477	105.721	-3.42396	1.51e-07	0.000593883	Gimap7	6	48718621	48724636	+	2325	protein_coding	GTPase, IMAP family member 7 [Source:MGI Symbol;Acc:MGI:1349657]	-	8	8	12	11	9	336	47	25	33	100	0.193574	0.15135	0.135242	0.19606	0.170987	5.50593	0.712461	0.395205	0.549025	1.85645
ENSMUSG00000040264	2.76351	14.0655	2.7093	0	7.82563	301.094	31.4249	38.0387	15.9194	131.504	5.47278	103.596	-4.24983	2.49e-07	0.000818975	Gbp2b	3	142594847	142619179	+	2823	protein_coding	guanylate binding protein 2b [Source:MGI Symbol;Acc:MGI:95666]	-	2	13	4	0	7	310	36	41	16	125	0.0398565	0.202557	0.037128	0	0.10953	4.18374	0.449446	0.5338	0.219235	1.9112
ENSMUSG00000022181	420.054	394.915	228.935	288.118	408.051	661.436	761.182	1166.21	552.205	1042.56	348.015	836.719	-1.26789	4.56e-07	0.00128603	C6	15	4727175	4814967	+	3556	protein_coding	complement component 6 [Source:MGI Symbol;Acc:MGI:88233]	-	304	365	338	275	365	681	872	1257	555	991	4.80941	4.51489	2.49062	3.20473	4.53394	7.29625	8.64253	12.9921	6.03715	12.0287
ENSMUSG00000062783	52.5067	31.3768	71.7963	45.0512	68.1948	194.254	138.794	116.899	113.426	191.47	53.7852	150.969	-1.48186	5.5e-07	0.0013566	Csprs	GL456221.1	111572	163011	-	2719	protein_coding	component of Sp100-rs [Source:NCBI gene;Acc:114564]	-	38	29	106	43	61	200	159	126	114	182	0.786239	0.469142	1.02152	0.655359	0.990981	2.80243	2.06098	1.70321	1.6218	2.88914
ENSMUSG00000079457	22.1081	38.9505	55.5405	56.5759	35.7743	286.525	73.3249	154.01	87.5569	281.944	41.7899	176.672	-2.07023	1.05e-06	0.00229848	Gm7609	1	85199613	85213786	+	2496	transcribed_unprocessed_pseudogene	predicted pseudogene 7609 [Source:MGI Symbol;Acc:MGI:3644536]	-	16	36	82	54	32	295	84	166	88	268	0.360625	0.634415	0.860838	0.896539	0.566304	4.50289	1.1861	2.44438	1.36376	4.63443
ENSMUSG00000028713	2060.2	1870.71	1631	1426.97	1749.59	951.846	768.165	1031.68	1070.58	513.391	1747.69	867.134	1.01069	1.2e-06	0.00237079	Cyp4b1	4	115624725	115647723	-	2256	protein_coding	cytochrome P450, family 4, subfamily b, polypeptide 1 [Source:MGI Symbol;Acc:MGI:103225]	-	1491	1729	2408	1362	1565	980	880	1112	1076	488	37.1808	33.711	27.9685	25.0183	30.6422	16.5501	13.7477	18.1164	18.4491	9.33657
ENSMUSG00000041642	194.828	255.342	333.921	346.79	291.784	593.447	797.845	629.957	383.061	617.543	284.533	604.371	-1.08442	1.93e-06	0.00346021	Kif21b	1	136131389	136177998	+	12184	protein_coding	kinesin family member 21B [Source:MGI Symbol;Acc:MGI:109234]	-	141	236	493	331	261	611	914	679	385	587	0.651042	0.851996	1.06025	1.12579	0.946227	1.91058	2.64388	2.04826	1.22228	2.07948
ENSMUSG00000055430	161.665	421.964	1416.28	148.774	205.702	95.1846	109.987	92.7772	76.6123	57.8617	470.878	86.4846	2.44615	2.69e-06	0.0044162	Nap1l5	6	58905233	58907076	-	1844	protein_coding	nucleosome assembly protein 1-like 5 [Source:MGI Symbol;Acc:MGI:1923555]	-	117	390	2091	142	184	98	126	100	77	55	3.56948	9.30292	29.7129	3.19115	4.40759	2.02479	2.40822	1.99317	1.61522	1.28738
ENSMUSG00000025279	12.4358	17.3113	4.06394	1.0477	13.4154	311.778	25.3145	60.3052	22.8842	95.7349	9.65483	103.203	-3.43396	3.1e-06	0.00469954	Dnase1l3	14	7964533	7994573	-	5151	protein_coding	deoxyribonuclease 1-like 3 [Source:MGI Symbol;Acc:MGI:1314633]	-	9	16	6	1	12	321	29	65	23	91	0.0982949	0.136629	0.0305219	0.00804504	0.102904	2.37426	0.198423	0.463797	0.172718	0.762529
ENSMUSG00000026117	12.4358	5.40979	12.8692	18.8586	3.35384	263.214	41.027	20.411	49.7482	69.4341	10.5854	88.767	-3.06308	3.73e-06	0.00504561	Zap70	1	36761798	36782818	+	2992	protein_coding	zeta-chain (TCR) associated protein kinase [Source:MGI Symbol;Acc:MGI:99613]	-	9	5	19	18	3	271	47	22	50	66	0.169224	0.0735062	0.166397	0.249305	0.0442899	3.45082	0.553633	0.270251	0.646412	0.952114
ENSMUSG00000015314	6.90878	5.40979	10.1599	9.42932	4.47179	303.037	39.2812	11.1333	18.9043	49.4455	7.27591	84.3602	-3.52444	3.84e-06	0.00504561	Slamf6	1	171917515	171953170	+	10832	protein_coding	SLAM family member 6 [Source:MGI Symbol;Acc:MGI:1353620]	-	5	5	15	9	4	312	45	12	19	47	0.0259682	0.0203038	0.0362856	0.0344313	0.0163116	1.09739	0.146416	0.0407172	0.0678494	0.187282
ENSMUSG00000024526	2492.69	1475.79	1239.5	4198.14	1955.29	1453.02	357.022	349.77	510.417	331.39	2272.28	600.324	1.92026	4.91e-06	0.00605448	Cidea	18	67343564	67367794	+	1164	protein_coding	cell death-inducing DNA fragmentation factor, alpha subunit-like effector A [Source:MGI Symbol;Acc:MGI:1270845]	-	1804	1364	1830	4007	1749	1496	409	377	513	315	87.1894	51.5439	41.1956	142.655	66.3715	48.9658	12.3839	11.904	17.0477	11.6806
ENSMUSG00000102070	2827.07	1414.12	2809.54	3359.98	1424.26	1069.37	802.209	1221.88	1077.55	1138.3	2367	1061.86	1.15662	6.12e-06	0.0070965	Gm28661	1	24614885	24615565	-	681	unprocessed_pseudogene	predicted gene 28661 [Source:MGI Symbol;Acc:MGI:5579367]	-	2046	1307	4148	3207	1274	1101	919	1317	1083	1082	169.02	84.4198	159.604	195.151	82.6355	61.5963	47.5614	71.0795	61.5152	68.5783
ENSMUSG00000026390	23.4898	14.0655	18.2877	13.6201	25.7128	77.7017	85.5457	73.294	25.8691	67.33	19.0352	65.9481	-1.80127	7.01e-06	0.00768549	Marco	1	120474538	120505024	-	1925	protein_coding	macrophage receptor with collagenous structure [Source:MGI Symbol;Acc:MGI:1309998]	-	17	13	27	13	23	80	98	79	26	64	0.496819	0.297049	0.367524	0.279855	0.527766	1.58334	1.79424	1.50835	0.522449	1.43501
ENSMUSG00000073555	35.9256	47.6062	46.7353	55.5282	43.5999	269.042	109.987	60.3052	102.481	216.719	45.8791	151.707	-1.72187	9.33e-06	0.00968644	Gm4951	18	60212080	60247820	+	2645	protein_coding	predicted gene 4951 [Source:MGI Symbol;Acc:MGI:3644953]	-	26	44	69	53	39	277	126	65	103	206	0.553003	0.731716	0.683559	0.830367	0.651304	3.98996	1.67892	0.90322	1.5063	3.36162
ENSMUSG00000037686	154.757	35.7046	195.069	303.834	247.066	33.0232	75.0707	56.5941	30.8439	21.0406	187.286	43.3145	2.10967	1.19e-05	0.0113761	Aspg	12	112106679	112127559	+	3521	protein_coding	asparaginase [Source:MGI Symbol;Acc:MGI:2144822]	-	112	33	288	290	221	34	86	61	31	20	1.7895	0.412253	2.14328	3.41312	2.7725	0.367898	0.860832	0.636751	0.340562	0.245172
ENSMUSG00000048038	2.76351	5.40979	196.424	36.6696	4.47179	0	1.74583	0.927772	0	4.20813	49.1477	1.37635	5.17774	1.3e-05	0.0113761	Ccdc187	2	26243469	26294557	-	9827	protein_coding	coiled-coil domain containing 187 [Source:MGI Symbol;Acc:MGI:3045295]	-	2	5	290	35	4	0	2	1	0	4	0.0114496	0.0223802	0.773267	0.147593	0.0179797	0	0.0071729	0.00374011	0	0.0175689
ENSMUSG00000027316	114.686	129.835	157.139	122.581	129.682	61.1901	57.6124	62.1608	83.577	77.8503	130.785	68.4781	0.940986	1.31e-05	0.0113761	Gfra4	2	131039632	131043088	-	2165	protein_coding	glial cell line derived neurotrophic factor family receptor alpha 4 [Source:MGI Symbol;Acc:MGI:1341873]	-	83	120	232	117	116	63	66	67	84	74	2.15675	2.43803	2.8079	2.23948	2.36671	1.10866	1.07441	1.13742	1.5008	1.4753
ENSMUSG00000043556	105.013	154.72	111.758	140.392	107.323	57.305	68.0874	51.0275	75.6173	50.4975	123.841	60.5069	1.03288	1.33e-05	0.0113761	Fbxl7	15	26540459	26895580	-	6526	protein_coding	F-box and leucine-rich repeat protein 7 [Source:MGI Symbol;Acc:MGI:3052506]	-	76	143	165	134	96	59	78	55	76	48	0.655159	0.963839	0.662505	0.850898	0.649784	0.344444	0.421244	0.309757	0.450472	0.317469
ENSMUSG00000024670	11.054	2.16392	11.5145	8.38162	14.5333	192.312	79.4353	25.9776	11.9396	53.6536	9.52948	72.6636	-2.92983	1.46e-05	0.0119779	Cd6	19	10789341	10830058	-	3404	protein_coding	CD6 antigen [Source:MGI Symbol;Acc:MGI:103566]	-	8	2	17	8	13	198	91	28	12	51	0.132215	0.0258438	0.130861	0.0973913	0.168694	2.2161	0.942189	0.302325	0.136362	0.646677
ENSMUSG00000016763	5.52702	22.7211	198.456	8.38162	15.6513	0	4.36458	4.63886	1.98993	0	50.1474	2.19867	4.49973	1.86e-05	0.014145	Scube1	15	83604999	83725021	-	9829	protein_coding	signal peptide, CUB domain, EGF-like 1 [Source:MGI Symbol;Acc:MGI:1890616]	-	4	21	293	8	14	0	5	5	2	0	0.0228945	0.0939779	0.781107	0.0337288	0.0629163	0	0.0179286	0.0186968	0.00787085	0
ENSMUSG00000040026	69.0878	63.8356	84.6655	99.5317	198.995	280.697	714.918	155.866	191.033	495.507	103.223	367.604	-1.83271	1.86e-05	0.014145	Saa3	7	46711998	46715700	-	2606	protein_coding	serum amyloid A 3 [Source:MGI Symbol;Acc:MGI:98223]	-	50	59	125	95	178	289	819	168	192	471	1.07938	0.995848	1.25686	1.51067	3.0171	4.22511	11.0763	2.36941	2.84989	7.80105
ENSMUSG00000047880	12.4358	11.9015	6.77324	7.33392	4.47179	371.997	21.8229	12.061	11.9396	66.278	8.58326	96.8197	-3.50349	1.97e-05	0.0143691	Cxcr5	9	44511787	44561877	-	3332	protein_coding	chemokine (C-X-C motif) receptor 5 [Source:MGI Symbol;Acc:MGI:103567]	-	9	11	10	7	4	383	25	13	12	63	0.151956	0.145212	0.0786407	0.0870588	0.0530273	4.37933	0.264436	0.143398	0.139308	0.816098
ENSMUSG00000030830	78.7601	75.7371	52.8313	67.053	54.7794	752.735	153.633	110.405	107.456	224.083	65.8322	269.662	-2.03619	2.19e-05	0.0154482	Itgal	7	127296260	127335138	+	6569	protein_coding	integrin alpha L [Source:MGI Symbol;Acc:MGI:96606]	-	57	70	78	64	49	775	176	119	108	213	0.488153	0.468721	0.311134	0.403739	0.329489	4.49487	0.944277	0.665815	0.635954	1.39954
ENSMUSG00000089844	6.90878	11.9015	6.77324	6.28622	6.70768	72.8453	36.6624	15.7721	15.9194	64.1739	7.71549	41.0747	-2.41334	2.55e-05	0.0170998	A530032D15Rik	1	85083069	85109853	-	1603	protein_coding	RIKEN cDNA A530032D15Rik gene [Source:MGI Symbol;Acc:MGI:3037746]	-	5	11	10	6	6	75	42	17	16	61	0.175476	0.301839	0.163463	0.155109	0.165334	1.78255	0.923425	0.389781	0.386089	1.64249
ENSMUSG00000066363	1.38176	21.6392	5.41859	5.23851	25.7128	283.611	64.5957	43.6053	9.94965	147.284	11.8782	109.809	-3.20948	2.67e-05	0.0170998	Serpina3f	12	104214544	104221129	+	2290	protein_coding	serine (or cysteine) peptidase inhibitor, clade A, member 3F [Source:MGI Symbol;Acc:MGI:2182838]	-	1	20	8	5	23	292	74	47	10	140	0.0245666	0.384158	0.0915391	0.0904804	0.443646	4.85805	1.13889	0.754342	0.168914	2.63875
ENSMUSG00000022385	74.6148	69.2453	72.4736	81.7208	77.1383	207.852	188.55	93.705	134.32	159.909	75.0386	156.867	-1.06447	2.69e-05	0.0170998	Gtse1	15	85859745	85876573	+	2742	protein_coding	G two S phase expressed protein 1 [Source:MGI Symbol;Acc:MGI:1352755]	-	54	64	107	78	69	214	216	101	135	152	1.10791	1.02666	1.02251	1.17882	1.11154	2.97345	2.77634	1.35382	1.90444	2.39267
ENSMUSG00000030742	22.1081	29.2129	39.9621	14.6678	26.8307	441.928	90.7832	31.5443	53.7281	112.567	26.5563	146.11	-2.45371	3.3e-05	0.0198217	Lat	7	126363824	126369570	-	2767	protein_coding	linker for activation of T cells [Source:MGI Symbol;Acc:MGI:1342293]	-	16	27	59	14	24	455	104	34	54	107	0.325305	0.42921	0.558721	0.209671	0.38313	6.26493	1.32468	0.451622	0.754893	1.6691
ENSMUSG00000067649	9.67229	2.16392	6.77324	8.38162	5.58973	19.4254	30.552	64.9441	13.9295	47.3414	6.51616	35.2385	-2.44427	3.32e-05	0.0198217	Mageb18	X	92118879	92599572	-	2243	protein_coding	melanoma antigen family B, 18 [Source:MGI Symbol;Acc:MGI:3045344]	-	7	2	10	8	5	20	35	70	14	45	0.175569	0.0392208	0.116822	0.147802	0.0984658	0.339715	0.549952	1.14703	0.241435	0.865944
ENSMUSG00000078853	281.878	329.997	277.703	266.116	283.958	2346.59	323.852	497.286	438.779	1385.53	287.931	998.407	-1.79382	3.77e-05	0.0218881	Igtp	11	58199556	58207591	+	2022	protein_coding	interferon gamma induced GTPase [Source:MGI Symbol;Acc:MGI:107729]	-	204	305	410	254	254	2416	371	536	441	1317	5.67583	6.6349	5.31319	5.20562	5.54878	45.5229	6.46664	9.74293	8.43642	28.1133
ENSMUSG00000031748	490.523	623.208	955.704	681.007	574.625	420.56	398.049	335.854	408.931	322.974	665.013	377.274	0.820004	4.05e-05	0.0228171	Gnao1	8	93809966	93969388	+	11053	protein_coding	guanine nucleotide binding protein, alpha O [Source:MGI Symbol;Acc:MGI:95775]	-	355	576	1411	650	514	433	456	362	411	307	1.80688	2.29223	3.34502	2.43699	2.05413	1.49253	1.45402	1.20374	1.43834	1.19885
ENSMUSG00000059146	110.54	93.0484	264.834	481.943	143.097	96.1558	49.7562	65.8718	62.6828	53.6536	218.693	65.624	1.73855	4.17e-05	0.0228723	Ntrk3	7	78175959	78738012	-	30170	protein_coding	neurotrophic tyrosine kinase, receptor, type 3 [Source:MGI Symbol;Acc:MGI:97385]	-	80	86	391	460	128	99	57	71	63	51	0.149175	0.125383	0.339589	0.631833	0.187404	0.125018	0.0665864	0.0864946	0.080773	0.0729628
ENSMUSG00000108218	38.6892	43.2783	136.819	84.8639	54.7794	24.2818	20.0771	20.411	27.859	19.9886	71.686	22.5235	1.68198	4.46e-05	0.0238005	Olfr1372-ps1	11	52154722	52168159	-	9812	transcribed_unprocessed_pseudogene	olfactory receptor 1372, pseudogene 1 [Source:MGI Symbol;Acc:MGI:3031206]	-	28	40	202	81	49	25	23	22	28	19	0.160539	0.179316	0.539444	0.342095	0.220589	0.0970726	0.0826145	0.0824083	0.110383	0.08358
ENSMUSG00000023945	502.959	234.785	251.287	320.597	573.507	574.021	1360	1078.07	531.311	1093.06	376.627	927.293	-1.3016	5.25e-05	0.0272293	Slc5a7	17	54273590	54299034	-	5644	protein_coding	solute carrier family 5 (choline transporter), member 7 [Source:MGI Symbol;Acc:MGI:1927126]	-	364	217	371	306	513	591	1558	1162	534	1039	3.62823	1.69117	1.72242	2.24675	4.0149	3.98947	9.72896	7.56702	3.65978	7.94575
ENSMUSG00000000244	38.6892	48.6881	50.122	25.1449	48.0717	374.911	54.1207	104.838	91.5368	143.076	42.1432	153.697	-1.86409	5.68e-05	0.0287172	Tspan32	7	143005046	143019644	+	6234	protein_coding	tetraspanin 32 [Source:MGI Symbol;Acc:MGI:1350360]	-	28	45	74	24	43	386	62	113	92	136	0.25268	0.317513	0.311041	0.159538	0.304682	2.35904	0.350518	0.66622	0.57085	0.941626
ENSMUSG00000027514	161.665	147.146	95.5027	91.1501	171.046	684.746	258.383	177.205	196.008	751.151	133.302	413.498	-1.63492	6.04e-05	0.0297662	Zbp1	2	173206612	173218923	-	3529	protein_coding	Z-DNA binding protein 1 [Source:MGI Symbol;Acc:MGI:1927449]	-	117	136	141	87	153	705	296	191	197	714	1.86515	1.69513	1.04694	1.02162	1.91507	7.61117	2.95615	1.98924	2.15931	8.73279
ENSMUSG00000026814	2999.79	2843.39	3253.86	2834.04	2673.01	1814.33	1394.05	2366.75	1902.37	1186.69	2920.82	1732.84	0.753251	6.38e-05	0.0302832	Eng	2	32646595	32682669	+	4048	protein_coding	endoglin [Source:MGI Symbol;Acc:MGI:95392]	-	2171	2628	4804	2705	2391	1868	1597	2551	1912	1128	30.1717	28.5562	31.0967	27.6915	26.0906	17.5813	13.9043	23.162	18.2704	12.0275
ENSMUSG00000037318	26.2534	10.8196	23.7063	38.765	19.0051	390.451	56.7395	38.9664	50.7432	90.4747	23.7099	125.475	-2.40364	6.45e-05	0.0302832	Traf3ip3	1	193175453	193201703	-	5756	protein_coding	TRAF3 interacting protein 3 [Source:MGI Symbol;Acc:MGI:2441706]	-	19	10	35	37	17	402	65	42	51	86	0.1857	0.0764178	0.159331	0.26638	0.130459	2.66084	0.397996	0.268185	0.342729	0.644888
ENSMUSG00000056290	22.1081	51.934	33.1889	35.6219	38.0102	603.159	75.9436	42.6775	54.7231	183.054	36.1726	191.911	-2.40584	6.8e-05	0.0307167	Ms4a4b	19	11443553	11463549	+	5274	protein_coding	membrane-spanning 4-domains, subfamily A, member 4B [Source:MGI Symbol;Acc:MGI:1913083]	-	16	48	49	34	34	621	87	46	55	174	0.170671	0.400329	0.243449	0.267152	0.284763	4.48607	0.581387	0.32057	0.403389	1.42402
ENSMUSG00000074071	2.76351	3.24588	3.38662	6.28622	4.47179	156.375	9.60207	6.49441	15.9194	23.1447	4.0308	42.3071	-3.38898	6.85e-05	0.0307167	Fam169b	7	68273839	68363092	+	7027	protein_coding	family with sequence similarity 169, member B [Source:MGI Symbol;Acc:MGI:3644026]	-	2	3	5	6	4	161	11	7	16	22	0.0160118	0.0187788	0.0186446	0.0353835	0.025144	0.872911	0.0551707	0.0366129	0.0880747	0.135132
ENSMUSG00000051748	486.378	388.423	204.552	191.73	724.43	1002.35	1269.22	1147.65	474.598	1741.11	399.102	1126.99	-1.49892	7.43e-05	0.0312282	Wfdc21	11	83746940	83752642	+	434	protein_coding	WAP four-disulfide core domain 21 [Source:MGI Symbol;Acc:MGI:1913357]	-	352	359	302	183	648	1032	1454	1237	477	1655	45.6282	36.3848	18.2335	17.4736	65.9523	90.595	118.076	104.758	42.5138	164.594
ENSMUSG00000069515	179.628	125.507	163.912	192.777	128.564	571.107	238.306	211.532	277.595	666.988	158.078	393.106	-1.31382	7.47e-05	0.0312282	Lyz1	10	117287797	117292868	-	1263	protein_coding	lysozyme 1 [Source:MGI Symbol;Acc:MGI:96902]	-	130	116	242	184	115	588	273	228	279	634	5.79055	4.0399	5.0207	6.03718	4.02197	17.7373	7.61808	6.63494	8.5448	21.6667
ENSMUSG00000048031	1.38176	0	0	0	0	87.4144	12.2208	0	6.96475	2.10406	0.276351	21.7408	-6.25872	7.57e-05	0.0312282	Fcrl5	3	87435773	87500678	+	3480	protein_coding	Fc receptor-like 5 [Source:MGI Symbol;Acc:MGI:3053558]	-	1	0	0	0	0	90	14	0	7	2	0.0161659	0	0	0	0	0.98532	0.141786	0	0.0778072	0.024806
ENSMUSG00000028751	53.8885	138.491	46.7353	64.9576	230.297	321.491	364.879	537.18	161.184	356.639	106.874	348.275	-1.70613	7.6e-05	0.0312282	Pla2g2e	4	138877942	138882817	+	917	protein_coding	phospholipase A2, group IIE [Source:MGI Symbol;Acc:MGI:1349660]	-	39	128	69	62	206	331	418	579	162	339	2.39263	6.13983	1.97166	2.80183	9.92299	13.7522	16.0655	23.2068	6.83355	15.9565
ENSMUSG00000052477	161.665	135.245	89.4067	127.82	195.641	673.091	232.195	166.999	347.243	427.125	141.955	369.331	-1.38195	7.9e-05	0.0313383	C130026I21Rik	1	84992690	85270566	-	3827	protein_coding	RIKEN cDNA C130026I21 gene [Source:MGI Symbol;Acc:MGI:3612702]	-	117	125	132	122	175	693	266	180	349	406	1.71992	1.4367	0.90379	1.32106	2.01987	6.89905	2.44968	1.7287	3.52751	4.57904
ENSMUSG00000039264	114.686	141.737	113.79	73.3392	154.277	1424.85	210.373	198.543	193.023	322.974	119.566	469.954	-1.97488	7.94e-05	0.0313383	Gimap3	6	48764464	48770851	-	2577	protein_coding	GTPase, IMAP family member 3 [Source:MGI Symbol;Acc:MGI:1932723]	-	83	131	168	70	138	1467	241	214	194	307	1.81194	2.236	1.70823	1.12565	2.36543	21.6885	3.29601	3.05214	2.91198	5.14198
ENSMUSG00000032094	12.4358	14.0655	12.8692	15.7155	35.7743	338.974	34.0437	36.1831	36.8137	79.9544	18.172	105.194	-2.53506	8.16e-05	0.0315503	Cd3d	9	44981786	44987339	+	1815	protein_coding	CD3 antigen, delta polypeptide [Source:MGI Symbol;Acc:MGI:88331]	-	9	13	19	15	32	349	39	39	37	76	0.278963	0.315052	0.274302	0.342479	0.778786	7.32593	0.75731	0.789757	0.788544	1.80735
ENSMUSG00000028268	410.381	426.292	419.941	437.94	494.132	1531.69	592.709	678.202	594.989	1181.43	437.737	915.805	-1.06478	8.49e-05	0.0315503	Gbp3	3	142560026	142573209	+	3265	protein_coding	guanylate binding protein 3 [Source:MGI Symbol;Acc:MGI:1926263]	-	297	394	620	418	442	1577	679	731	598	1123	5.11745	5.30797	4.97578	5.30534	5.97976	18.4019	7.32947	8.22886	7.08466	14.8458
ENSMUSG00000021880	40.0709	51.934	51.4766	45.0512	39.1281	427.359	101.258	77.9329	57.708	167.273	45.5322	166.306	-1.86645	8.64e-05	0.0315503	Rnase6	14	51123908	51132187	+	2667	protein_coding	ribonuclease, RNase A family, 6 [Source:MGI Symbol;Acc:MGI:1925666]	-	29	48	76	43	35	440	116	84	58	159	0.611723	0.791651	0.746694	0.668137	0.579682	6.28556	1.53293	1.15761	0.841213	2.57324
ENSMUSG00000038855	2393.2	2193.13	2080.74	1977.01	2020.13	1528.78	1436.82	1798.95	1388.97	1239.29	2132.84	1478.56	0.5281	8.64e-05	0.0315503	Itpkb	1	180330485	180424802	+	10463	protein_coding	inositol 1,4,5-trisphosphate 3-kinase B [Source:MGI Symbol;Acc:MGI:109235]	-	1732	2027	3072	1887	1807	1574	1646	1939	1396	1178	9.31262	8.52144	7.69338	7.4737	7.62863	5.73143	5.54446	6.81126	5.16096	4.85954
ENSMUSG00000083563	96.7229	120.097	136.142	138.297	61.4871	41.7647	23.5687	41.7498	69.6475	44.1853	110.549	44.1832	1.32904	9.05e-05	0.0324659	Gm13340	2	22588103	22589647	-	1545	unprocessed_pseudogene	predicted gene 13340 [Source:MGI Symbol;Acc:MGI:3650227]	-	70	111	201	132	55	43	27	45	70	42	2.54888	3.16017	3.40894	3.54051	1.57246	1.06036	0.615916	1.07051	1.75255	1.17335
ENSMUSG00000070034	139.557	156.884	120.564	155.06	122.974	624.527	283.697	154.01	227.847	396.616	139.008	337.34	-1.27948	9.78e-05	0.0344322	Sp110	1	85576899	85598817	-	6781	protein_coding	Sp110 nuclear body protein [Source:MGI Symbol;Acc:MGI:1923364]	SAND	101	145	178	148	110	643	325	166	229	377	0.83793	0.940567	0.687826	0.904457	0.716545	3.6127	1.68918	0.899746	1.3063	2.39968
ENSMUSG00000027359	20.7263	16.2294	33.8662	27.2403	62.605	6.7989	11.3479	2.78332	0	2.10406	32.1334	4.60684	2.78652	9.96e-05	0.0344822	Slc27a2	2	126552407	126588243	+	3754	protein_coding	solute carrier family 27 (fatty acid transporter), member 2 [Source:MGI Symbol;Acc:MGI:1347099]	-	15	15	50	26	56	7	13	3	0	2	0.22479	0.175757	0.349002	0.287011	0.658929	0.0710425	0.122049	0.0293719	0	0.0229955
ENSMUSG00000034336	5.52702	14.0655	214.712	2.09541	23.4769	3.88508	3.49166	2.78332	6.96475	1.05203	51.9753	3.63537	3.84437	0.000102855	0.0349778	Ina	19	47014698	47025327	+	3240	protein_coding	internexin neuronal intermediate filament protein, alpha [Source:MGI Symbol;Acc:MGI:96568]	-	4	13	317	2	21	4	4	3	7	1	0.0694536	0.176487	2.5637	0.0255803	0.286298	0.0470359	0.0435112	0.0340316	0.0835707	0.0133218
ENSMUSG00000101939	136.794	150.392	150.366	294.404	156.513	81.5868	52.3749	69.5829	73.6274	119.932	177.694	79.4207	1.16482	0.000110606	0.036976	Gm28438	1	24612775	24613119	-	345	unprocessed_pseudogene	predicted gene 28438 [Source:MGI Symbol;Acc:MGI:5579144]	-	99	139	222	281	140	84	60	75	74	114	16.1434	17.7219	16.8611	33.7526	17.9248	9.27629	6.1294	7.99002	8.29686	14.2624
ENSMUSG00000031217	1025.26	1089.53	751.152	889.5	911.127	687.66	440.822	662.43	573.1	386.096	933.315	550.021	0.762009	0.000114125	0.0375168	Efnb1	X	99136130	99148991	+	3452	protein_coding	ephrin B1 [Source:MGI Symbol;Acc:MGI:102708]	-	742	1007	1109	849	815	708	505	714	576	367	12.0924	12.8314	8.41808	10.1919	10.4287	7.81406	5.15592	7.60209	6.45435	4.58883
ENSMUSG00000038754	150.611	33.5407	91.4387	71.2438	64.8409	38.8508	13.0937	32.472	16.9144	7.36422	82.3351	21.739	1.91709	0.000119509	0.0386427	Elovl3	19	46131897	46135307	+	1494	protein_coding	elongation of very long chain fatty acids (FEN1/Elo2, SUR4/Elo3, yeast)-like 3 [Source:MGI Symbol;Acc:MGI:1195976]	-	109	31	135	68	58	40	15	35	17	7	4.10446	0.912697	2.36775	1.88616	1.71483	1.02006	0.353856	0.86104	0.440149	0.202234
ENSMUSG00000024669	4.14527	17.3113	5.41859	10.477	12.2974	149.576	36.6624	20.411	12.9345	67.33	9.92993	57.3828	-2.53209	0.000132941	0.0419896	Cd5	19	10718143	10738974	-	2069	protein_coding	CD5 antigen [Source:MGI Symbol;Acc:MGI:88340]	-	3	16	8	10	11	154	42	22	13	64	0.0815719	0.340154	0.101317	0.20029	0.234843	2.83579	0.715443	0.390812	0.243043	1.33514
ENSMUSG00000109505	6.90878	2.16392	20.997	2.09541	11.1795	0	0	0	0	0	8.66892	0	5.62666	0.000135948	0.0419896	Gm44677	7	91627272	91631010	+	3739	TEC	predicted gene 44677 [Source:MGI Symbol;Acc:MGI:5753253]	-	5	2	31	2	10	0	0	0	0	0	0.0752306	0.0235283	0.217249	0.0221664	0.118138	0	0	0	0	0
ENSMUSG00000018819	947.884	1202.06	1091.85	1136.76	962.552	2386.41	1577.36	1142.09	1781.98	2418.62	1068.22	1861.29	-0.80069	0.000136247	0.0419896	Lsp1	7	142460809	142494867	+	5174	protein_coding	lymphocyte specific 1 [Source:MGI Symbol;Acc:MGI:96832]	-	686	1111	1612	1085	861	2457	1807	1231	1791	2299	7.45895	9.44503	8.16377	8.69007	7.35058	18.0923	12.3089	8.74455	13.3897	19.1787
ENSMUSG00000104713	168.574	191.507	104.985	104.77	158.748	661.436	212.118	232.871	198.993	734.318	145.717	407.947	-1.48661	0.000142204	0.0431514	Gbp6	5	105270702	105293698	-	5954	protein_coding	guanylate binding protein 6 [Source:MGI Symbol;Acc:MGI:2140937]	-	122	177	155	100	142	681	243	251	200	698	1.15274	1.30762	0.682143	0.696003	1.05347	4.35765	1.43841	1.54943	1.29934	5.06003
ENSMUSG00000061100	1945.51	3924.26	1851.13	1477.26	1227.51	5432.32	2802.93	3948.6	4186.81	10529.8	2085.13	5380.09	-1.36746	0.000145348	0.043437	Retnla	16	48842551	48844461	+	599	protein_coding	resistin like alpha [Source:MGI Symbol;Acc:MGI:1888504]	-	1408	3627	2733	1410	1098	5593	3211	4256	4208	10009	132.238	266.34	119.554	97.5466	80.9693	355.74	188.929	261.144	271.738	721.224
ENSMUSG00000032093	27.6351	8.65567	12.8692	20.9541	16.7692	232.134	30.552	25.0499	76.6123	49.4455	17.3766	82.7587	-2.26131	0.000150447	0.0442897	Cd3e	9	44998740	45009627	-	4080	protein_coding	CD3 antigen, epsilon polypeptide [Source:MGI Symbol;Acc:MGI:88332]	-	20	8	19	20	15	239	35	27	77	47	0.275772	0.0862473	0.122024	0.203137	0.162396	2.23178	0.302339	0.243226	0.730015	0.497215
ENSMUSG00000030225	364.783	537.733	292.604	283.927	413.64	738.166	692.222	587.28	548.226	656.468	378.538	644.472	-0.769169	0.000155812	0.0451948	Dera	6	137754546	137857340	+	8127	protein_coding	deoxyribose-phosphate aldolase (putative) [Source:MGI Symbol;Acc:MGI:1913762]	-	264	497	432	271	370	760	793	633	551	624	1.82748	2.68993	1.39285	1.38184	2.01102	3.56285	3.43897	2.86272	2.62254	3.31406
ENSMUSG00000071553	58.0337	69.2453	38.6075	42.9558	58.1332	78.673	232.195	163.288	67.6576	147.284	53.3951	137.82	-1.3741	0.000159804	0.0456809	Cpa2	6	30541582	30564476	+	3212	protein_coding	carboxypeptidase A2, pancreatic [Source:MGI Symbol;Acc:MGI:3617840]	-	42	64	57	41	52	81	266	176	68	140	0.73562	0.876436	0.464999	0.528967	0.715109	0.960779	2.91872	2.01392	0.818907	1.8813
ENSMUSG00000064337	28285.9	17686.8	29330.2	27207.8	20305.3	13649.3	10997	16291.7	13372.3	19032.3	24563.2	14668.5	0.743803	0.00016331	0.0458204	mt-Rnr1	MT	70	1024	+	955	Mt_rRNA	mitochondrially encoded 12S rRNA [Source:MGI Symbol;Acc:MGI:102493]	-	20471	16347	43303	25969	18163	14053	12598	17560	13440	18091	1205.91	752.923	1188.14	1126.86	840.096	560.635	464.926	675.814	544.373	817.647
ENSMUSG00000055555	6.90878	6.49175	7.45056	10.477	8.94357	18.4542	48.0103	34.3276	11.9396	51.5496	8.05434	32.8562	-2.02788	0.000164939	0.0458204	4930502E18Rik	X	53724826	53738441	+	1427	protein_coding	RIKEN cDNA 4930502E18 gene [Source:MGI Symbol;Acc:MGI:1922263]	-	5	6	11	10	8	19	55	37	12	49	0.197118	0.184945	0.201986	0.2904	0.247634	0.507275	1.35839	0.952979	0.325281	1.4821
ENSMUSG00000025732	1293.32	1328.65	1667.57	1231.05	1717.17	781.873	733.249	1168.07	1023.82	672.248	1447.55	875.851	0.725127	0.000168393	0.0458586	Mcrip2	17	25863698	25868738	-	816	protein_coding	MAPK regulated corepressor interacting protein 2 [Source:MGI Symbol;Acc:MGI:1915491]	-	936	1228	2462	1175	1536	805	840	1259	1029	639	64.5306	66.1948	79.0588	59.6716	83.1468	37.5855	36.2807	56.7076	48.7783	33.8
ENSMUSG00000114277	64.9425	73.5732	58.2498	55.5282	88.3178	121.409	100.385	147.516	137.305	113.619	68.1223	124.047	-0.868629	0.000172392	0.0458586	Gm48583	13	60641790	60642009	+	220	processed_pseudogene	predicted gene, 48583 [Source:MGI Symbol;Acc:MGI:6098152]	-	47	68	86	53	79	125	115	159	138	108	12.0186	13.5957	10.243	9.98328	15.8617	21.6472	18.423	26.5632	24.2637	21.1889
ENSMUSG00000072235	12527	14490.7	8527.51	10198.3	18799.4	19769.3	30783.4	38777.2	13815.1	31570.4	12908.6	26943.1	-1.06162	0.000172953	0.0458586	Tuba1a	15	98949837	98953703	-	1803	protein_coding	tubulin, alpha 1A [Source:MGI Symbol;Acc:MGI:98869]	-	9066	13393	12590	9734	16816	20354	35265	41796	13885	30009	282.879	326.737	182.971	223.725	411.976	430.099	689.341	852.01	297.887	718.393
ENSMUSG00000069874	415.908	530.16	387.429	363.553	448.297	2349.5	535.097	642.019	546.236	1694.82	429.069	1153.54	-1.42678	0.000174376	0.0458586	Irgm2	11	58199618	58222782	+	3690	protein_coding	immunity-related GTPase family M member 2 [Source:MGI Symbol;Acc:MGI:1926262]	-	301	490	572	347	401	2419	613	692	549	1611	4.58902	5.84097	4.06183	3.89693	4.80024	24.976	5.85491	6.89264	5.75502	18.8441
ENSMUSG00000031710	3925.57	530.16	2851.53	6711.58	2044.72	1009.15	118.716	29.6887	68.6526	108.359	3212.71	266.914	3.58936	0.000186921	0.0485109	Ucp1	8	83290352	83298452	+	1636	protein_coding	uncoupling protein 1 (mitochondrial, proton carrier) [Source:MGI Symbol;Acc:MGI:98894]	-	2841	490	4210	6406	1829	1039	136	32	69	103	97.694	13.1743	67.4297	162.264	49.3827	24.1962	2.92982	0.718906	1.63142	2.71744
ENSMUSG00000074896	263.915	332.161	320.374	271.355	552.266	962.53	686.111	476.875	464.649	1391.84	348.014	796.401	-1.19403	0.000190681	0.0488441	Ifit3	19	34583531	34588731	+	1745	protein_coding	interferon-induced protein with tetratricopeptide repeats 3 [Source:MGI Symbol;Acc:MGI:1101055]	-	191	307	473	259	494	991	786	514	467	1323	6.15769	7.73853	7.10261	6.1507	12.5048	21.6368	15.875	10.8261	10.352	32.7243
ENSMUSG00000047844	4.14527	0	76.5376	31.4311	5.58973	1.94254	0	0	0.994965	0	23.5407	0.587501	5.34624	0.000194413	0.0491615	Bex4	X	136138996	136140443	+	837	protein_coding	brain expressed X-linked 4 [Source:MGI Symbol;Acc:MGI:3606746]	-	3	0	113	30	5	2	0	0	1	0	0.20164	0	3.53757	1.48531	0.263869	0.0910372	0	0	0.0462142	0
ENSMUSG00000031167	1630.47	1581.82	1519.24	1685.75	1755.18	2914.78	2155.23	2106.04	2117.28	2201.9	1634.49	2299.05	-0.492415	0.000199157	0.0495873	Rbm3	X	8138975	8145880	-	4698	protein_coding	RNA binding motif (RNP1, RRM) protein 3 [Source:MGI Symbol;Acc:MGI:1099460]	-	1180	1462	2243	1609	1570	3001	2469	2270	2128	2093	14.1302	13.6883	12.5103	14.1926	14.7615	24.337	18.5223	17.759	17.521	19.2293
ENSMUSG00000066364	1.38176	1.08196	2.03197	1.0477	0	14.5691	9.60207	35.2554	0	42.0813	1.10868	20.3016	-4.14663	0.000201401	0.0495873	Serpina3b	12	104127996	104139545	+	2070	protein_coding	serine (or cysteine) peptidase inhibitor, clade A, member 3B [Source:MGI Symbol;Acc:MGI:2182835]	-	1	1	3	1	0	15	11	38	0	40	0.0271775	0.0212493	0.0379755	0.0200193	0	0.27608	0.187287	0.674713	0	0.834058
ENSMUSG00000035042	111.922	68.1634	88.7294	90.1024	177.754	723.597	188.55	172.566	134.32	433.437	107.334	330.494	-1.62353	0.00020411	0.0495873	Ccl5	11	83525778	83530518	-	960	protein_coding	chemokine (C-C motif) ligand 5 [Source:MGI Symbol;Acc:MGI:98262]	-	81	63	131	86	159	745	216	186	135	412	4.74672	2.88659	3.57563	3.71233	7.31595	29.5665	7.92991	7.12111	5.43956	18.5239
ENSMUSG00000030790	378.601	572.356	1065.43	321.645	240.359	203.967	257.51	149.371	214.912	218.823	515.678	208.917	1.30545	0.000207478	0.0495873	Adm	7	110627661	110629820	+	1619	protein_coding	adrenomedullin [Source:MGI Symbol;Acc:MGI:108058]	-	274	529	1573	307	215	210	295	161	216	208	9.52103	14.3722	25.4586	7.85799	5.86592	4.94182	6.42186	3.65498	5.16069	5.54527
ENSMUSG00000051855	1655.34	1606.71	3025.61	3827.26	2488.55	3762.7	8603.45	5312.42	3021.71	7474.69	2520.69	5634.99	-1.16041	0.000208667	0.0495873	Mest	6	30723547	30748465	+	3945	protein_coding	mesoderm specific transcript [Source:MGI Symbol;Acc:MGI:96968]	-	1198	1485	4467	3653	2226	3874	9856	5726	3037	7105	17.084	16.5575	29.6703	38.3727	24.9243	37.4134	88.0521	53.347	29.7782	77.7362
ENSMUSG00000082292	56.652	21.6392	16.2558	24.0972	14.5333	248.645	52.3749	56.5941	31.8389	183.054	26.6355	114.501	-2.11607	0.000213236	0.0500699	Gm12250	11	58187739	58189012	+	1274	processed_pseudogene	predicted gene 12250 [Source:MGI Symbol;Acc:MGI:3649299]	-	41	20	24	23	13	256	60	61	32	174	1.81048	0.69052	0.493622	0.748132	0.450732	7.6557	1.65985	1.75981	0.971587	5.89503
ENSMUSG00000054072	461.506	698.945	323.083	328.979	469.538	5786.83	649.449	1172.7	536.286	4195.5	456.41	2468.16	-2.43516	0.000219804	0.0510048	Iigp1	18	60376029	60392627	+	3121	protein_coding	interferon inducible GTPase 1 [Source:MGI Symbol;Acc:MGI:1926259]	-	334	646	477	314	420	5958	744	1264	539	3988	6.0205	9.10446	4.00476	4.16923	5.94429	72.7312	8.40166	14.8853	6.6803	55.1528
ENSMUSG00000027217	757.202	925.075	1069.49	816.16	958.08	538.084	613.659	768.196	492.508	521.808	905.202	586.851	0.625891	0.000249062	0.0571221	Tspan18	2	93201760	93334505	-	8175	protein_coding	tetraspanin 18 [Source:MGI Symbol;Acc:MGI:1917186]	-	548	855	1579	779	857	554	703	828	495	496	3.77114	4.60038	5.06112	3.94884	4.6306	2.58188	3.03077	3.72262	2.34217	2.61879
ENSMUSG00000029417	899.523	1396.81	390.138	708.247	913.363	4157.04	1476.97	1627.31	908.403	3415.95	861.616	2317.14	-1.42762	0.000260601	0.0589768	Cxcl9	5	92321347	92328079	-	3016	protein_coding	chemokine (C-X-C motif) ligand 9 [Source:MGI Symbol;Acc:MGI:1352449]	-	651	1291	576	676	817	4280	1692	1754	913	3247	12.1431	18.8283	5.0043	9.28828	11.9656	54.0663	19.7722	21.3749	11.7096	46.4684
ENSMUSG00000015354	823.526	1019.2	684.097	692.531	545.558	960.587	1783.37	1259.91	1017.85	2204.01	752.984	1445.14	-0.940756	0.00026534	0.0589768	Pcolce2	9	95637601	95698096	+	4625	protein_coding	procollagen C-endopeptidase enhancer 2 [Source:MGI Symbol;Acc:MGI:1923727]	-	596	942	1010	661	488	989	2043	1358	1023	2095	7.24961	8.9589	5.72219	5.92256	4.66072	8.14702	15.5684	10.7918	8.55588	19.5514
ENSMUSG00000076612	70.4695	33.5407	2.7093	86.9593	3.35384	5583.84	657.305	4.63886	881.539	34.717	39.4065	1432.41	-5.18548	0.000266119	0.0589768	Ighg2c	12	113285325	113288932	-	1326	IG_C_gene	immunoglobulin heavy constant gamma 2C [Source:MGI Symbol;Acc:MGI:2686979]	-	51	31	4	83	3	5749	753	5	886	33	2.16375	1.02833	0.079044	2.59391	0.0999361	165.182	20.0142	0.13859	25.8459	1.07418
ENSMUSG00000040387	6.90878	0	109.049	11.5247	5.58973	0	1.74583	0	0.994965	2.10406	26.6145	0.968972	4.79591	0.000270121	0.0591985	Klhl32	4	24612554	24851124	-	7826	protein_coding	kelch-like 32 [Source:MGI Symbol;Acc:MGI:3612790]	-	5	0	161	11	5	0	2	0	1	2	0.0359427	0	0.539062	0.0582469	0.0282212	0	0.00900692	0	0.00494266	0.0110305
ENSMUSG00000037411	469.797	800.649	520.185	1127.33	1217.44	888.713	2631.84	2058.73	1568.06	2071.45	827.081	1843.76	-1.15668	0.000274911	0.0595862	Serpine1	5	137061504	137072268	-	3876	protein_coding	serine (or cysteine) peptidase inhibitor, clade E, member 1 [Source:MGI Symbol;Acc:MGI:97608]	-	340	740	768	1076	1089	915	3015	2219	1576	1969	4.93486	8.39776	5.19194	11.504	12.4105	8.99397	27.4151	21.0416	15.728	21.9265
ENSMUSG00000042351	16.5811	31.3768	26.4156	37.7173	38.0102	301.094	85.5457	37.1109	45.7684	95.7349	30.0202	113.051	-1.91057	0.000286075	0.061332	Grap2	15	80572594	80652854	+	6243	protein_coding	GRB2-related adaptor protein 2 [Source:MGI Symbol;Acc:MGI:1333842]	-	12	29	39	36	34	310	98	40	46	91	0.108135	0.204324	0.163691	0.238962	0.240564	1.89183	0.553247	0.23549	0.285014	0.629151
ENSMUSG00000028071	15.1993	7.57371	10.1599	3.14311	23.4769	171.915	15.7125	21.3388	38.8036	73.6422	11.9106	64.2824	-2.43962	0.000312154	0.0662035	Sh2d2a	3	87846755	87855722	+	5939	protein_coding	SH2 domain containing 2A [Source:MGI Symbol;Acc:MGI:1351596]	-	11	7	15	3	21	177	18	23	39	70	0.104198	0.0518442	0.0661805	0.0209328	0.156189	1.13547	0.106818	0.142338	0.254011	0.508735
ENSMUSG00000002204	37.3074	38.9505	42.6714	44.0035	49.1897	518.659	51.502	84.4273	56.713	127.296	42.4245	167.719	-1.98221	0.000325211	0.0682389	Napsa	7	44572380	44586862	+	2660	protein_coding	napsin A aspartic peptidase [Source:MGI Symbol;Acc:MGI:109365]	-	27	36	63	42	44	534	59	91	57	121	0.571034	0.595301	0.620599	0.654316	0.730661	7.64846	0.781729	1.25738	0.828885	1.96341
ENSMUSG00000000409	20.7263	40.0325	49.4446	31.4311	91.6716	571.107	116.971	67.7274	60.6928	157.805	46.6612	194.861	-2.05983	0.000330323	0.068582	Lck	4	129548344	129573641	-	2929	protein_coding	lymphocyte protein tyrosine kinase [Source:MGI Symbol;Acc:MGI:96756]	-	15	37	73	30	82	588	134	73	61	150	0.288106	0.555646	0.653064	0.424445	1.23663	7.64843	1.61239	0.916029	0.805585	2.21044
ENSMUSG00000025607	965.847	920.747	1083.72	1041.42	1149.25	1320.93	2717.39	1789.67	1134.26	2114.58	1032.2	1815.37	-0.814497	0.000334843	0.0687964	Copg2	6	30747554	30896794	-	5121	protein_coding	coatomer protein complex, subunit gamma 2 [Source:MGI Symbol;Acc:MGI:1858683]	-	699	851	1600	994	1028	1360	3113	1929	1140	2010	7.67896	7.30955	8.18686	8.04362	8.86713	10.1181	21.4245	13.8447	8.61095	16.9413
ENSMUSG00000037447	88.4323	142.819	99.5666	144.583	146.451	329.261	222.593	199.471	192.028	189.366	124.37	226.544	-0.865374	0.000367591	0.0747461	Arid5a	1	36307733	36324029	+	12540	protein_coding	AT rich interactive domain 5A (MRF1-like) [Source:MGI Symbol;Acc:MGI:2443039]	ARID	64	132	147	138	131	339	255	215	193	180	0.287119	0.463012	0.307165	0.456038	0.461443	1.02995	0.716685	0.630154	0.595334	0.619557
ENSMUSG00000098814	0	0	3.38662	0	2.23589	70.9028	6.11041	1.85554	59.6979	1.05203	1.1245	27.9237	-4.52606	0.000404441	0.0813999	Igkv19-93	6	68736297	68736780	-	363	IG_V_gene	immunoglobulin kappa chain variable 19-93 [Source:MGI Symbol;Acc:MGI:107617]	-	0	0	5	0	2	73	7	2	60	1	0	0	0.360924	0	0.243371	7.66179	0.679638	0.202502	6.3936	0.118905
ENSMUSG00000000305	26.2534	33.5407	108.372	85.9116	11.1795	6.7989	9.60207	3.71109	19.8993	15.7805	53.0514	11.1584	2.26131	0.000410902	0.081865	Cdh4	2	179442431	179899373	+	7257	protein_coding	cadherin 4 [Source:MGI Symbol;Acc:MGI:99218]	-	19	31	160	82	10	7	11	4	20	15	0.147291	0.187897	0.577717	0.468249	0.0608678	0.0367498	0.0534222	0.0202586	0.106604	0.0892156
ENSMUSG00000026104	737.857	801.731	780.954	723.962	1019.57	2908.96	1193.28	1187.55	872.584	2185.07	812.815	1669.49	-1.03832	0.000417585	0.0823242	Stat1	1	52119440	52161865	+	7105	protein_coding	signal transducer and activator of transcription 1 [Source:MGI Symbol;Acc:MGI:103063]	STAT	534	741	1153	691	912	2995	1367	1280	877	2077	4.22822	4.58743	4.25224	4.03027	5.6699	16.0601	6.78095	6.62143	4.77459	12.6177
ENSMUSG00000002033	17.9628	28.1309	27.093	27.2403	44.7179	415.704	59.3582	37.1109	30.8439	112.567	29.029	131.117	-2.1737	0.000421554	0.0823242	Cd3g	9	44969572	44980431	-	3269	protein_coding	CD3 antigen, gamma polypeptide [Source:MGI Symbol;Acc:MGI:88333]	-	13	26	40	26	40	428	68	40	31	107	0.223722	0.349844	0.320625	0.329593	0.540493	4.98819	0.733128	0.449729	0.366816	1.41278
ENSMUSG00000073209	35.9256	32.4588	48.7673	36.6696	95.0255	79.6442	190.296	205.965	63.6777	139.92	49.7694	135.901	-1.44915	0.000434901	0.0840979	Klf14	6	30956023	30959078	-	3056	protein_coding	Kruppel-like factor 14 [Source:MGI Symbol;Acc:MGI:3577024]	zf-C2H2	26	30	72	35	85	82	218	222	64	133	0.47863	0.431801	0.61735	0.474607	1.2286	1.02229	2.51414	2.66996	0.810079	1.87847
ENSMUSG00000050232	38.6892	27.049	21.6744	30.3834	46.9538	254.473	54.9937	61.233	59.6979	83.1105	32.9499	102.702	-1.64649	0.000440184	0.0842931	Cxcr3	X	101731535	101734269	-	1731	protein_coding	chemokine (C-X-C motif) receptor 3 [Source:MGI Symbol;Acc:MGI:1277207]	-	28	25	32	29	42	262	63	66	60	79	0.909999	0.63527	0.484401	0.694258	1.07176	5.76658	1.28271	1.40137	1.34077	1.96987
ENSMUSG00000074497	2.76351	3.24588	2.7093	0	0	60.2188	15.7125	8.34995	17.9094	2.10406	1.74374	20.8589	-3.56963	0.000452185	0.085442	A430078G23Rik	8	3353415	3390299	+	4755	protein_coding	RIKEN cDNA A430078G23 gene [Source:MGI Symbol;Acc:MGI:2442135]	-	2	3	4	0	0	62	18	9	18	2	0.0236624	0.0277515	0.0220425	0	0	0.49677	0.133416	0.0695661	0.146428	0.0181546
ENSMUSG00000017692	208.645	228.293	165.267	215.827	260.482	321.491	343.056	406.364	286.55	309.297	215.703	333.352	-0.631732	0.000454847	0.085442	Rhbdl3	11	80300912	80355955	+	4734	protein_coding	rhomboid like 3 [Source:MGI Symbol;Acc:MGI:2179276]	-	151	211	244	206	233	331	393	438	288	294	1.79444	1.96051	1.35056	1.80326	2.17406	2.66388	2.92584	3.40057	2.35323	2.68056
ENSMUSG00000036832	22.1081	11.9015	23.7063	47.1466	21.241	40.7934	102.131	101.127	33.8288	108.359	25.2207	77.2479	-1.6134	0.000468388	0.0871555	Lpar3	3	146220963	146286186	+	2464	protein_coding	lysophosphatidic acid receptor 3 [Source:MGI Symbol;Acc:MGI:1929469]	-	16	11	35	45	19	42	117	109	34	103	0.365308	0.196367	0.372203	0.756818	0.34061	0.649416	1.67352	1.62589	0.533752	1.80428
ENSMUSG00000037944	16.5811	21.6392	16.2558	24.0972	13.4154	228.249	35.7895	25.0499	29.8489	66.278	18.3977	77.043	-2.06563	0.000483721	0.0887843	Ccr7	11	99144196	99155077	-	1978	protein_coding	chemokine (C-C motif) receptor 7 [Source:MGI Symbol;Acc:MGI:103011]	-	12	20	24	23	12	235	41	27	30	63	0.341299	0.444753	0.317934	0.481861	0.267978	4.52643	0.730539	0.501699	0.586673	1.37474
ENSMUSG00000073008	6.90878	9.73763	2.7093	9.42932	1.11795	165.116	9.60207	9.27772	12.9345	36.8211	5.98059	46.7503	-2.97784	0.000486144	0.0887843	Gpr174	X	107255878	107296769	+	5402	protein_coding	G protein-coupled receptor 174 [Source:MGI Symbol;Acc:MGI:2685222]	-	5	9	4	9	1	170	11	10	13	35	0.0520709	0.073283	0.0194025	0.0690411	0.00817692	1.19897	0.0717669	0.0680379	0.0930872	0.279653
ENSMUSG00000000248	1.38176	0	0	0	0	28.1669	3.49166	2.78332	2.98489	7.36422	0.276351	8.95819	-4.9783	0.000508716	0.0920543	Clec2g	6	128934381	128984707	+	2847	protein_coding	C-type lectin domain family 2, member g [Source:MGI Symbol;Acc:MGI:1918059]	-	1	0	0	0	0	29	4	3	3	7	0.0197603	0	0	0	0	0.388083	0.0495175	0.0387293	0.0407601	0.106125
ENSMUSG00000030149	23.4898	41.1144	23.7063	31.4311	29.0666	175.8	48.8833	51.0275	48.7533	90.4747	29.7617	82.9878	-1.47953	0.000569465	0.0994563	Klrk1	6	129610323	129623864	-	7183	protein_coding	killer cell lectin-like receptor subfamily K, member 1 [Source:MGI Symbol;Acc:MGI:1196250]	-	17	38	35	30	26	181	56	55	49	86	0.133144	0.232698	0.127678	0.173075	0.159887	0.960035	0.274769	0.281425	0.263871	0.516772
ENSMUSG00000027435	2360.04	2015.69	2000.81	2016.83	1518.17	1430.68	1357.38	1288.68	1451.65	1549.64	1982.31	1415.61	0.485629	0.000570747	0.0994563	Cd93	2	148436640	148443563	-	6677	protein_coding	CD93 antigen [Source:MGI Symbol;Acc:MGI:106664]	-	1708	1863	2954	1925	1358	1473	1555	1389	1459	1473	14.3909	12.2729	11.5926	11.9473	8.98386	8.40496	8.20796	7.64586	8.4523	9.52199
ENSMUSG00000030745	26.2534	23.8031	30.4796	26.1926	20.123	524.486	36.6624	20.411	30.8439	81.0064	25.3703	138.682	-2.44888	0.000571328	0.0994563	Il21r	7	125603429	125633570	+	3324	protein_coding	interleukin 21 receptor [Source:MGI Symbol;Acc:MGI:1890475]	-	19	22	45	25	18	540	42	22	31	77	0.321568	0.291123	0.354735	0.311673	0.239197	6.18938	0.445322	0.243258	0.360746	0.999853
ENSMUSG00000037358	92.5776	81.1469	70.4417	95.3409	62.605	46.621	38.4083	50.0997	46.7633	35.7691	80.4224	43.5323	0.880969	0.000573698	0.0994563	4930578C19Rik	X	18414881	18461397	-	3499	protein_coding	RIKEN cDNA 4930578C19 gene [Source:MGI Symbol;Acc:MGI:1923155]	-	67	75	104	91	56	48	44	54	47	34	1.07724	0.942829	0.778828	1.07775	0.70695	0.522651	0.443195	0.567225	0.519583	0.419413
ENSMUSG00000043017	48.3614	93.0484	75.8603	46.0989	48.0717	135.978	83.7999	150.299	107.456	162.013	62.2882	127.909	-1.03074	0.000574833	0.0994563	Ptgir	7	16906490	16910905	+	3334	protein_coding	prostaglandin I receptor (IP) [Source:MGI Symbol;Acc:MGI:99535]	-	35	86	112	44	43	140	96	162	108	154	0.590585	1.13461	0.880247	0.546899	0.569702	1.59984	1.01483	1.78589	1.25302	1.99371
ENSMUSG00000037849	9.67229	18.3933	14.9011	3.14311	13.4154	133.064	34.0437	15.7721	21.8892	62.0699	11.905	53.3678	-2.15743	0.000629701	0.108002	Ifi206	1	173468485	173491041	-	3054	protein_coding	interferon activated gene 206 [Source:MGI Symbol;Acc:MGI:3646410]	-	7	17	22	3	12	137	39	17	22	59	0.128946	0.244847	0.188758	0.0407073	0.173563	1.70909	0.450072	0.204591	0.278647	0.833853
ENSMUSG00000019987	81.5236	22.7211	40.6394	12.5724	5.58973	1.94254	6.11041	3.71109	8.95468	8.41625	32.6093	5.82699	2.48344	0.000647133	0.110035	Arg1	10	24915221	24927484	-	2228	protein_coding	arginase, liver [Source:MGI Symbol;Acc:MGI:88070]	-	59	21	60	12	5	2	7	4	9	8	1.48976	0.414591	0.705648	0.223196	0.0991287	0.0342002	0.110731	0.0659858	0.156253	0.154982
ENSMUSG00000051998	17.9628	24.885	10.1599	63.9099	33.5384	507.975	75.9436	78.8607	38.8036	39.9772	30.0912	148.312	-2.3033	0.00068045	0.114711	Lax1	1	133679091	133690108	-	2309	protein_coding	lymphocyte transmembrane adaptor 1 [Source:MGI Symbol;Acc:MGI:2443362]	-	13	23	15	61	30	523	87	85	39	38	0.316738	0.438147	0.170224	1.09478	0.573908	8.62963	1.32795	1.35301	0.653344	0.71034
ENSMUSG00000048616	114.686	109.278	113.113	61.8145	65.9589	82.558	180.693	346.059	216.902	233.551	92.97	211.953	-1.18853	0.000705353	0.117332	Nog	11	89300638	89302332	-	1695	protein_coding	noggin [Source:MGI Symbol;Acc:MGI:104327]	-	83	101	167	59	59	85	207	373	218	222	2.75479	2.621	2.58166	1.44245	1.53754	1.91057	4.30414	8.08807	4.97494	5.65314
ENSMUSG00000071552	0	8.65567	4.74127	4.19081	3.35384	69.9315	12.2208	16.6999	5.96979	33.665	4.18832	27.6974	-2.69806	0.000709168	0.117332	Tigit	16	43648867	43664146	-	919	protein_coding	T cell immunoreceptor with Ig and ITIM domains [Source:MGI Symbol;Acc:MGI:3642260]	-	0	8	7	4	3	72	14	18	6	32	0	0.382904	0.199588	0.18037	0.144195	2.98491	0.536906	0.719884	0.252544	1.50294
ENSMUSG00000105096	20.7263	23.8031	6.09591	28.288	12.2974	184.542	12.2208	60.3052	11.9396	221.979	18.2421	98.1972	-2.43458	0.000717679	0.117332	Gbp10	5	105215699	105239533	-	3873	protein_coding	guanylate-binding protein 10 [Source:MGI Symbol;Acc:MGI:4359647]	-	15	22	9	27	11	190	14	65	12	211	0.217883	0.249857	0.0608902	0.288892	0.125456	1.86905	0.127399	0.616839	0.119849	2.35148
ENSMUSG00000034855	63.5607	83.3108	36.5755	77.53	62.605	333.146	107.369	150.299	46.7633	288.257	64.7164	185.167	-1.51912	0.000725162	0.117332	Cxcl10	5	92346638	92348889	-	2252	protein_coding	chemokine (C-X-C motif) ligand 10 [Source:MGI Symbol;Acc:MGI:1352450]	-	46	77	54	74	56	343	123	162	47	274	1.14913	1.50397	0.628315	1.36171	1.09841	5.80283	1.92496	2.64394	0.807292	5.25156
ENSMUSG00000050921	13.8176	15.1474	32.5115	18.8586	26.8307	269.042	49.7562	38.0387	17.9094	78.9024	21.4332	90.7297	-2.07275	0.000728038	0.117332	P2ry10	X	107088492	107104974	+	2982	protein_coding	purinergic receptor P2Y, G-protein coupled 10 [Source:MGI Symbol;Acc:MGI:1926076]	-	10	14	48	18	24	277	57	41	18	75	0.188657	0.206508	0.42178	0.250141	0.355507	3.53905	0.673679	0.505338	0.233489	1.08558
ENSMUSG00000078954	24.8716	19.4753	19.6424	17.8109	15.6513	2.91381	6.11041	2.78332	8.95468	6.31219	19.4903	5.41488	1.84884	0.00073169	0.117332	Arhgap8	15	84720052	84772207	+	3546	protein_coding	Rho GTPase activating protein 8 [Source:MGI Symbol;Acc:MGI:1920417]	-	18	18	29	17	14	3	7	3	9	6	0.285571	0.22328	0.214295	0.198669	0.174395	0.0322327	0.0695737	0.0310948	0.0981759	0.073033
ENSMUSG00000018168	24.8716	31.3768	18.9651	70.1961	22.3589	592.475	75.9436	25.0499	48.7533	91.5268	33.5537	166.75	-2.31382	0.000747708	0.118887	Ikzf3	11	98464902	98546031	-	8754	protein_coding	IKAROS family zinc finger 3 [Source:MGI Symbol;Acc:MGI:1342542]	zf-C2H2	18	29	28	67	20	610	87	27	49	87	0.115677	0.145716	0.0838115	0.317167	0.100918	2.65483	0.350267	0.113361	0.216516	0.428962
ENSMUSG00000110063	0	0	0	0	0	3.88508	2.61875	7.42218	9.94965	5.26016	0	5.82716	-4.9347	0.000753441	0.118887	Gm31045	8	25463677	25487585	-	922	lincRNA	predicted gene, 31045 [Source:MGI Symbol;Acc:MGI:5590204]	-	0	0	0	0	0	4	3	8	10	5	0	0	0	0	0	0.165289	0.114677	0.318908	0.419537	0.23407
ENSMUSG00000056054	63.5607	58.4258	20.3197	72.2915	74.9024	151.518	209.5	96.4883	66.6626	221.979	57.9	149.23	-1.3732	0.00077737	0.120822	S100a8	3	90668978	90670035	+	694	protein_coding	S100 calcium binding protein A8 (calgranulin A) [Source:MGI Symbol;Acc:MGI:88244]	-	46	54	30	69	67	156	240	104	67	211	3.72888	3.42255	1.1327	4.12012	4.26442	8.56405	12.1881	5.50782	3.73436	13.1229
ENSMUSG00000076577	0	0	1.35465	0	0	101.012	16.5854	1.85554	0	99.943	0.27093	43.8792	-6.78343	0.000777957	0.120822	Igkv8-30	6	70117061	70117620	-	368	IG_V_gene	immunoglobulin kappa chain variable 8-30 [Source:MGI Symbol;Acc:MGI:3642250]	-	0	0	2	0	0	104	19	2	0	95	0	0	0.142408	0	0	10.7671	1.81967	0.199751	0	11.1425
ENSMUSG00000079339	2.76351	2.16392	19.6424	6.28622	4.47179	117.524	28.8062	8.34995	9.94965	70.4861	7.06556	47.0231	-2.68946	0.0007957	0.121728	Ifit1bl1	19	34592888	34601968	-	2275	protein_coding	interferon induced protein with tetratricpeptide repeats 1B like 1 [Source:MGI Symbol;Acc:MGI:3650685]	-	2	2	29	6	4	121	33	9	10	67	0.0494571	0.0386691	0.334017	0.109292	0.0776646	2.02637	0.511233	0.145401	0.170028	1.27116
ENSMUSG00000037940	116.067	131.999	111.081	73.3392	152.041	340.916	207.754	188.338	221.877	147.284	116.905	221.234	-0.921558	0.000815539	0.121728	Inpp4b	8	81342556	82127914	+	13066	protein_coding	inositol polyphosphate-4-phosphatase, type II [Source:MGI Symbol;Acc:MGI:2158925]	-	84	122	164	70	136	351	238	203	223	140	0.361674	0.410708	0.328892	0.222011	0.45977	1.02348	0.641978	0.57103	0.660181	0.462479
ENSMUSG00000061013	0	0	130.046	25.1449	6.70768	3.88508	0.872915	0	0.994965	1.05203	32.3797	1.361	4.58407	0.000817299	0.121728	Mkx	18	6910459	7004780	-	3925	protein_coding	mohawk homeobox [Source:MGI Symbol;Acc:MGI:2687286]	-	0	0	192	24	6	4	1	0	1	1	0	0	1.28178	0.253391	0.0675237	0.0388271	0.00897938	0	0.00985511	0.0109968
ENSMUSG00000041481	80.1418	61.6716	56.2179	32.4788	105.087	1163.58	125.7	102.983	112.431	319.818	67.1194	364.903	-2.4437	0.000819701	0.121728	Serpina3g	12	104236245	104241939	+	2105	protein_coding	serine (or cysteine) peptidase inhibitor, clade A, member 3G [Source:MGI Symbol;Acc:MGI:105046]	-	58	57	83	31	94	1198	144	111	113	304	1.55009	1.19107	1.03319	0.61028	1.97252	21.683	2.411	1.9381	2.07648	6.23344
ENSMUSG00000025488	5281.07	2127.13	2410.6	8441.34	3107.89	2310.65	851.965	1041.89	2881.42	1467.58	4273.61	1710.7	1.32085	0.000820945	0.121728	Cox8b	7	140898945	140900446	-	360	protein_coding	cytochrome c oxidase subunit 8B [Source:MGI Symbol;Acc:MGI:105958]	-	3822	1966	3559	8057	2780	2379	976	1123	2896	1395	597.267	240.213	259.047	927.45	341.104	251.771	95.5506	114.652	311.17	167.255
ENSMUSG00000006386	971.374	1059.24	803.306	1214.29	806.04	737.195	632.864	605.835	745.229	618.595	970.849	667.943	0.539066	0.00082544	0.121728	Tek	4	94739289	94874976	+	4712	protein_coding	TEK receptor tyrosine kinase [Source:MGI Symbol;Acc:MGI:98664]	-	703	979	1186	1159	721	759	725	653	749	588	8.39325	9.13888	6.59526	10.1929	6.75888	6.13692	5.42274	5.09347	6.14862	5.38615
ENSMUSG00000028270	1033.55	1331.89	766.053	868.545	1216.33	3709.28	1442.06	1496.5	1077.55	3346.51	1043.27	2214.38	-1.08596	0.000826987	0.121728	Gbp2	3	142620602	142638008	+	2516	protein_coding	guanylate binding protein 2 [Source:MGI Symbol;Acc:MGI:102772]	-	748	1231	1131	829	1088	3819	1652	1613	1083	3181	16.7252	21.521	11.7789	13.6541	19.1013	57.83	23.1412	23.5629	16.6502	54.5707
ENSMUSG00000004612	29.0169	43.2783	28.4476	34.5742	58.1332	276.812	89.9103	39.8942	40.7936	185.158	38.69	126.514	-1.71002	0.000843585	0.122309	Nkg7	7	43437073	43438249	+	914	protein_coding	natural killer cell group 7 sequence [Source:MGI Symbol;Acc:MGI:1931250]	-	21	40	42	33	52	285	103	43	41	176	1.29257	1.92499	1.20408	1.49619	2.51305	11.8799	3.97171	1.72913	1.73516	8.31138
ENSMUSG00000074766	56.652	75.7371	253.996	72.2915	80.4922	35.937	39.2812	24.1221	52.7331	45.2374	107.834	39.4622	1.45969	0.000849155	0.122309	Ism1	2	139678178	139758581	+	2965	protein_coding	isthmin 1, angiogenesis inhibitor [Source:MGI Symbol;Acc:MGI:2442963]	-	41	70	375	69	72	37	45	26	53	43	0.777928	1.03846	3.31405	0.964371	1.07264	0.475435	0.534901	0.322296	0.691436	0.625965
ENSMUSG00000025318	5.52702	12.9835	164.59	17.8109	0	0	6.11041	3.71109	2.98489	1.05203	40.1822	2.77168	3.85462	0.000849539	0.122309	Jph3	8	121729623	121794276	+	4457	protein_coding	junctophilin 3 [Source:MGI Symbol;Acc:MGI:1891497]	-	4	12	243	17	0	0	7	4	3	1	0.0504891	0.118428	1.42862	0.158062	0	0	0.055353	0.0329855	0.0260363	0.0096842
ENSMUSG00000016496	344.057	318.096	296.668	328.979	433.763	669.206	625.88	496.358	413.905	456.582	344.313	532.386	-0.630455	0.000877146	0.125368	Cd274	19	29367455	29388095	+	3622	protein_coding	CD274 antigen [Source:MGI Symbol;Acc:MGI:1926446]	-	249	294	438	314	388	689	717	535	416	434	3.86751	3.57038	3.16868	3.59254	4.73182	7.24745	6.97681	5.42889	4.44269	5.17187
ENSMUSG00000060550	780.692	879.632	522.217	574.141	932.368	2823.49	1387.94	950.039	900.443	1353.96	737.81	1483.17	-1.00789	0.000916355	0.129205	H2-Q7	17	35439155	35443773	+	4265	protein_coding	histocompatibility 2, Q region locus 7 [Source:MGI Symbol;Acc:MGI:95936]	-	565	813	771	548	834	2907	1590	1024	905	1287	7.45263	8.38469	4.73683	5.32453	8.63757	25.9681	13.1391	8.82443	8.20787	13.0246
ENSMUSG00000055170	0	0	0.677324	0	0	23.3105	7.85624	9.27772	0	6.31219	0.135465	9.35133	-5.04211	0.000917092	0.129205	Ifng	10	118441046	118445892	+	1295	protein_coding	interferon gamma [Source:MGI Symbol;Acc:MGI:107656]	-	0	0	1	0	0	24	9	10	0	6	0	0	0.020234	0	0	0.706083	0.244939	0.283815	0	0.199981
ENSMUSG00000055413	147.848	202.326	119.886	185.443	209.056	599.274	354.404	214.315	239.786	296.673	172.912	340.891	-0.980703	0.000924931	0.129385	H2-Q5	17	35394126	35397800	+	1591	polymorphic_pseudogene	histocompatibility 2, Q region locus 5 [Source:MGI Symbol;Acc:MGI:95934]	-	107	187	177	177	187	617	406	231	241	282	3.7835	5.16996	2.91511	4.61023	5.19178	14.7751	8.99377	5.33639	5.85933	7.65042
ENSMUSG00000064364	163.047	166.622	258.738	227.351	252.656	129.179	87.2915	95.5606	179.094	98.891	213.683	118.003	0.860214	0.000933209	0.129624	mt-Th	MT	11546	11612	+	67	Mt_tRNA	mitochondrially encoded tRNA histidine [Source:MGI Symbol;Acc:MGI:102485]	-	118	154	382	217	226	133	100	103	180	94	99.0803	101.102	149.397	134.216	148.997	75.6295	52.6031	56.5026	103.92	60.5563
ENSMUSG00000024887	475.324	442.521	492.414	450.512	343.21	332.175	297.664	287.609	312.419	336.65	440.796	313.303	0.493899	0.000946359	0.130418	Asah2	19	31984654	32061469	-	4682	protein_coding	N-acylsphingosine amidohydrolase 2 [Source:MGI Symbol;Acc:MGI:1859310]	-	344	409	727	430	307	342	341	310	314	320	4.1334	3.84244	4.0687	3.8059	2.89635	2.78297	2.5669	2.43353	2.59417	2.95002
ENSMUSG00000050350	4.14527	7.57371	9.48253	2.09541	8.94357	135.978	21.8229	6.49441	9.94965	28.4049	6.4481	40.53	-2.63751	0.000952152	0.130418	Gpr18	14	121911253	121915781	-	1498	protein_coding	G protein-coupled receptor 18 [Source:MGI Symbol;Acc:MGI:107859]	-	3	7	14	2	8	140	25	7	10	27	0.112665	0.205543	0.244889	0.0553271	0.235897	3.56066	0.588185	0.171748	0.25822	0.777962
ENSMUSG00000076498	24.8716	40.0325	8.12789	22.0018	83.846	841.121	145.777	67.7274	49.7482	172.533	35.7759	255.381	-2.83813	0.00096381	0.131105	Trbc2	6	41546730	41548352	+	692	TR_C_gene	T cell receptor beta, constant 2 [Source:MGI Symbol;Acc:MGI:4835227]	-	18	37	12	21	75	866	167	73	50	164	1.46334	2.35186	0.454389	1.25757	4.7874	47.6789	8.50543	3.87724	2.79489	10.2293
ENSMUSG00000038421	15.1993	30.2948	10.8372	15.7155	6.70768	317.606	47.1374	14.8444	21.8892	30.5089	15.7509	86.3971	-2.45812	0.000994813	0.132976	Fcrla	1	170917576	170927583	-	1745	protein_coding	Fc receptor-like A [Source:MGI Symbol;Acc:MGI:2138647]	-	11	28	16	15	6	327	54	16	22	29	0.354632	0.705794	0.240257	0.356218	0.15188	7.13948	1.09065	0.337	0.487672	0.717314
ENSMUSG00000018924	11.054	8.65567	5.41859	4.19081	1.11795	18.4542	13.9666	5.56663	46.7633	88.3707	6.08741	34.6243	-2.52076	0.000995979	0.132976	Alox15	11	70344152	70352031	-	2454	protein_coding	arachidonate 15-lipoxygenase [Source:MGI Symbol;Acc:MGI:87997]	-	8	8	8	4	1	19	16	6	47	84	0.183398	0.143394	0.0854216	0.0675469	0.0179999	0.29498	0.22979	0.0898633	0.74084	1.47744
ENSMUSG00000021360	484.996	477.144	324.438	479.848	579.096	584.705	971.555	946.328	536.286	877.394	469.104	783.254	-0.741201	0.000998689	0.132976	Gcnt2	13	40859754	40960892	+	7051	protein_coding	glucosaminyl (N-acetyl) transferase 2, I-branching enzyme [Source:MGI Symbol;Acc:MGI:1100870]	-	351	441	479	458	518	602	1113	1020	539	834	2.80051	2.75108	1.78007	2.69175	3.24507	3.25282	5.56327	5.31686	2.95692	5.10531
ENSMUSG00000022180	1008.68	894.78	1400.03	759.584	802.686	532.257	578.743	623.463	742.244	646.999	973.152	624.741	0.640644	0.00100453	0.132976	Slc7a8	14	54722209	54781946	-	5005	protein_coding	solute carrier family 7 (cationic amino acid transporter, y+ system), member 8 [Source:MGI Symbol;Acc:MGI:1355323]	-	730	827	2067	725	718	548	663	672	746	615	8.20538	7.26804	10.8215	6.0028	6.33673	4.17149	4.66869	4.93482	5.76548	5.30368
ENSMUSG00000049103	349.584	229.375	384.043	358.314	438.235	1162.61	626.753	321.937	454.699	1324.51	351.91	778.102	-1.14434	0.00101953	0.133989	Ccr2	9	124101950	124113557	+	6760	protein_coding	chemokine (C-C motif) receptor 2 [Source:MGI Symbol;Acc:MGI:106185]	-	253	212	567	342	392	1197	718	347	457	1259	2.10549	1.37945	2.1978	2.09652	2.56144	6.74624	3.74338	1.88664	2.61499	8.03869
ENSMUSG00000035929	1945.51	1879.36	1508.4	2030.45	2746.8	6466.72	3617.36	2525.4	2409.8	3563.23	2022.1	3716.5	-0.878258	0.00102577	0.133989	H2-Q4	17	35379617	35385290	+	2596	protein_coding	histocompatibility 2, Q region locus 4 [Source:MGI Symbol;Acc:MGI:95933]	-	1408	1737	2227	1938	2457	6658	4144	2722	2422	3387	30.5125	29.4314	22.4785	30.9363	41.8066	97.7132	56.2602	38.538	36.0886	56.3141
ENSMUSG00000100707	12.4358	4.32783	31.1569	16.7632	21.241	2.91381	5.23749	0	2.98489	3.1561	17.185	2.85846	2.59538	0.0010406	0.135031	Gm28523	6	141246920	141250009	-	1588	antisense	predicted gene 28523 [Source:MGI Symbol;Acc:MGI:5579229]	-	9	4	46	16	19	3	6	0	3	3	0.318839	0.110796	0.759031	0.417532	0.528503	0.0719755	0.133164	0	0.0730755	0.0815412
ENSMUSG00000091803	225.226	249.932	180.168	225.256	183.343	307.893	316.868	313.587	270.63	312.453	212.785	304.286	-0.51951	0.0010582	0.135951	Cox16	12	81359026	81485127	-	3751	protein_coding	cytochrome c oxidase assembly protein 16 [Source:MGI Symbol;Acc:MGI:1913522]	-	163	231	266	215	164	317	363	338	272	297	2.44467	2.70882	1.85818	2.37526	1.93126	3.21978	3.41072	3.31189	2.80494	3.41756
ENSMUSG00000034949	85.6688	103.868	335.275	200.111	102.851	65.0752	45.3916	67.7274	103.476	53.6536	165.555	67.0648	1.30967	0.00106147	0.135951	Zfr2	10	81233155	81252123	+	7483	protein_coding	zinc finger RNA binding protein 2 [Source:MGI Symbol;Acc:MGI:2143792]	-	62	96	495	191	92	67	52	73	104	51	0.466118	0.564301	1.73333	1.05774	0.543071	0.341125	0.244914	0.358553	0.537599	0.294172
ENSMUSG00000036880	6240.01	5116.58	4614.61	7038.47	6191.19	4369.75	3874.87	3978.29	4821.6	3606.36	5840.17	4130.17	0.499633	0.00106972	0.136123	Acaa2	18	74779197	74806207	+	1515	protein_coding	acetyl-Coenzyme A acyltransferase 2 (mitochondrial 3-oxoacyl-Coenzyme A thiolase) [Source:MGI Symbol;Acc:MGI:1098623]	-	4516	4729	6813	6718	5538	4499	4439	4288	4846	3428	167.695	137.301	117.836	183.758	161.467	113.14	103.266	104.027	123.729	97.664
ENSMUSG00000020486	645.28	668.65	810.079	726.058	661.824	560.423	496.689	532.541	457.684	324.026	702.378	474.273	0.566957	0.00108727	0.13747	2021-09-04	11	87568903	87590539	+	3563	protein_coding	septin 4 [Source:MGI Symbol;Acc:MGI:1270156]	-	467	618	1196	693	592	577	569	574	460	308	7.37363	7.62936	8.79564	8.06004	7.33923	6.16984	5.62837	5.92109	4.99394	3.73114
ENSMUSG00000090186	24.8716	19.4753	12.8692	19.9063	5.58973	65.0752	27.9333	25.9776	53.7281	65.226	16.5424	47.588	-1.5348	0.00110328	0.138605	Gm7592	1	85526690	85550577	+	627	transcribed_unprocessed_pseudogene	predicted gene 7592 [Source:MGI Symbol;Acc:MGI:3644077]	-	18	18	19	19	5	67	32	28	54	62	1.61505	1.26276	0.794033	1.25576	0.352247	4.07119	1.79874	1.64133	3.3314	4.26806
ENSMUSG00000029664	109.159	84.3928	53.5086	116.295	154.277	128.208	281.079	305.237	125.366	300.881	103.526	228.154	-1.14444	0.00113656	0.141768	Tfpi2	6	3962595	3988919	-	1747	protein_coding	tissue factor pathway inhibitor 2 [Source:MGI Symbol;Acc:MGI:108543]	-	79	78	79	111	138	132	322	329	126	286	2.54398	1.96389	1.18491	2.63299	3.48924	2.87869	6.49604	6.92164	2.78984	7.0661
ENSMUSG00000041479	56.652	93.0484	77.8922	146.678	97.2614	50.5061	42.7728	64.0163	23.8792	28.4049	94.3065	41.9159	1.16854	0.00114283	0.141768	Syt15	14	34219595	34230420	+	5164	protein_coding	synaptotagmin XV [Source:MGI Symbol;Acc:MGI:2442166]	-	41	86	115	140	87	52	49	69	24	27	0.446661	0.732534	0.583531	1.12347	0.744179	0.383647	0.334423	0.491098	0.179774	0.225675
ENSMUSG00000073565	190.682	245.605	201.165	259.83	397.989	352.571	522.876	571.508	350.228	445.009	259.054	448.438	-0.792485	0.00115487	0.142366	Prr16	18	51117898	51304641	+	2224	protein_coding	proline rich 16 [Source:MGI Symbol;Acc:MGI:1918623]	-	138	227	297	248	356	363	599	616	352	423	3.4908	4.48959	3.49924	4.62101	7.07066	6.21851	9.49244	10.1801	6.12222	8.20941
ENSMUSG00000062939	6.90878	6.49175	4.74127	1.0477	15.6513	115.581	13.9666	11.1333	18.9043	33.665	6.96815	38.6501	-2.48219	0.00118662	0.145372	Stat4	1	51987148	52107189	+	3872	protein_coding	signal transducer and activator of transcription 4 [Source:MGI Symbol;Acc:MGI:103062]	STAT	5	6	7	1	14	119	16	12	19	32	0.0726465	0.0681603	0.0473713	0.0107025	0.159712	1.17092	0.145637	0.113907	0.18981	0.356715
ENSMUSG00000071856	403.473	351.637	346.112	352.028	238.123	158.317	239.179	189.266	271.625	198.834	338.274	211.444	0.677172	0.00119513	0.145511	Mcc	18	44425060	44812182	-	14577	protein_coding	mutated in colorectal cancers [Source:MGI Symbol;Acc:MGI:96930]	-	292	325	511	336	213	163	274	204	273	189	1.12692	0.980688	0.918555	0.955193	0.64544	0.426024	0.662473	0.514361	0.724428	0.559629
ENSMUSG00000037202	6.90878	8.65567	0	6.28622	10.0615	63.1326	8.72915	37.1109	19.8993	32.613	6.38244	32.297	-2.36975	0.0012465	0.150441	Prf1	10	61297833	61304680	+	2584	protein_coding	perforin 1 (pore forming protein) [Source:MGI Symbol;Acc:MGI:97551]	-	5	8	0	6	9	65	10	40	20	31	0.108857	0.13618	0	0.0962229	0.153849	0.958374	0.136393	0.568949	0.299391	0.517816
ENSMUSG00000020395	8.29053	8.65567	9.48253	10.477	16.7692	128.208	8.72915	22.2665	29.8489	38.9252	10.735	45.5955	-2.08578	0.00125088	0.150441	Itk	11	46325150	46389515	-	5354	protein_coding	IL2 inducible T cell kinase [Source:MGI Symbol;Acc:MGI:96621]	-	6	8	14	10	15	132	10	24	30	37	0.0630453	0.0657245	0.0685176	0.0774001	0.123754	0.939312	0.0658275	0.164755	0.216742	0.298284
ENSMUSG00000093894	6.90878	10.8196	2.03197	0	0	199.111	20.95	1.85554	13.9295	8.41625	3.95207	48.8524	-3.64646	0.0012606	0.150692	Ighv1-53	12	115158403	115158835	-	351	IG_V_gene	immunoglobulin heavy variable 1-53 [Source:MGI Symbol;Acc:MGI:3576502]	-	5	10	3	0	0	205	24	2	14	8	0.801388	1.25317	0.223958	0	0	22.2516	2.40985	0.209425	1.54284	0.98376
ENSMUSG00000078920	215.554	236.949	123.273	138.297	175.518	938.248	222.593	223.593	197.998	691.185	177.918	454.723	-1.35495	0.00128378	0.152538	Ifi47	11	49076587	49096974	+	2473	protein_coding	interferon gamma inducible protein 47 [Source:MGI Symbol;Acc:MGI:99448]	-	156	219	182	132	157	966	255	241	199	657	3.54879	3.89525	1.92841	2.21192	2.80427	14.8822	3.63414	3.58178	3.11265	11.4669
ENSMUSG00000048251	6.90878	10.8196	4.06394	17.8109	7.82563	202.024	23.5687	8.34995	13.9295	27.3528	9.48578	55.0451	-2.54143	0.00132632	0.155086	Bcl11b	12	107910403	108003602	-	8111	protein_coding	B cell leukemia/lymphoma 11B [Source:MGI Symbol;Acc:MGI:1929913]	zf-C2H2	5	10	6	17	7	208	27	9	14	26	0.0346797	0.0542302	0.0193834	0.0868549	0.0381213	0.977019	0.117321	0.0407825	0.0667659	0.138358
ENSMUSG00000035778	928.54	771.436	887.971	663.196	868.645	695.43	482.722	554.808	616.878	565.993	823.958	583.166	0.498798	0.00132712	0.155086	Ggta1	2	35400179	35463231	-	4709	protein_coding	glycoprotein galactosyltransferase alpha 1, 3 [Source:MGI Symbol;Acc:MGI:95704]	-	672	713	1311	633	777	716	553	598	620	538	8.02825	6.66003	7.29502	5.57051	7.28848	5.79293	4.13888	4.66743	5.09289	4.93128
ENSMUSG00000001281	165.811	178.523	119.209	58.6713	116.266	843.063	203.389	170.71	178.099	309.297	127.696	340.912	-1.41778	0.00133809	0.155086	Itgb7	15	102215995	102231944	-	2770	protein_coding	integrin beta 7 [Source:MGI Symbol;Acc:MGI:96616]	-	120	165	176	56	104	868	233	184	179	294	2.43715	2.62011	1.66489	0.837776	1.65843	11.9386	2.96457	2.44143	2.49962	4.58115
ENSMUSG00000026009	4.14527	19.4753	16.2558	9.42932	0	98.0984	26.1875	31.5443	36.8137	33.665	9.86112	45.2618	-2.1752	0.0013425	0.155086	Icos	1	60977927	61000320	+	3430	protein_coding	inducible T cell co-stimulator [Source:MGI Symbol;Acc:MGI:1858745]	-	3	18	24	9	0	101	30	34	37	32	0.0492048	0.230831	0.183345	0.108735	0	1.12187	0.308257	0.364326	0.417262	0.402682
ENSMUSG00000024534	151.993	135.245	140.206	203.254	120.738	87.4144	66.3416	116.899	90.5418	50.4975	150.287	82.3389	0.866736	0.00134454	0.155086	Sncaip	18	52767709	52915935	+	4522	protein_coding	synuclein, alpha interacting protein (synphilin) [Source:MGI Symbol;Acc:MGI:1915097]	-	110	125	207	194	108	90	76	126	91	48	1.36849	1.21589	1.19948	1.77783	1.05496	0.758274	0.592337	1.02411	0.778416	0.45816
ENSMUSG00000034612	672.915	585.34	854.105	482.991	584.686	389.48	440.822	442.547	477.583	297.725	636.007	409.631	0.635426	0.00135547	0.155437	Chst11	10	82985498	83195900	+	5527	protein_coding	carbohydrate sulfotransferase 11 [Source:MGI Symbol;Acc:MGI:1927166]	-	487	541	1261	461	523	401	505	477	480	283	4.95701	4.3055	5.9783	3.45646	4.17981	2.7642	3.22024	3.17201	3.35933	2.21006
ENSMUSG00000097365	15.1993	9.73763	33.1889	10.477	44.7179	4.85636	3.49166	7.42218	6.96475	5.26016	22.6641	5.59902	2.02668	0.0013647	0.155592	C030034L19Rik	3	9403064	9437233	+	5786	lincRNA	RIKEN cDNA C030034L19 gene [Source:MGI Symbol;Acc:MGI:2444519]	-	11	9	49	10	40	5	4	8	7	5	0.106953	0.0684195	0.221906	0.0716212	0.30537	0.0329235	0.0243651	0.050818	0.0467973	0.0372991
ENSMUSG00000045589	5.52702	1.08196	31.8342	6.28622	0	0	0	0	0	0	8.94588	0	5.67327	0.00139667	0.156558	Frrs1l	4	56957173	56990391	-	6817	protein_coding	ferric-chelate reductase 1 like [Source:MGI Symbol;Acc:MGI:2442704]	-	4	1	47	6	0	0	0	0	0	0	0.0330101	0.00645242	0.180658	0.0364735	0	0	0	0	0	0
ENSMUSG00000000386	49.7432	49.7701	55.5405	29.3357	69.3127	146.662	98.6394	67.7274	63.6777	239.863	50.7404	123.314	-1.27931	0.00139758	0.156558	Mx1	16	97447035	97462907	-	3785	protein_coding	MX dynamin-like GTPase 1 [Source:MGI Symbol;Acc:MGI:97243]	-	36	46	82	28	62	151	113	73	64	228	0.535077	0.534574	0.567676	0.306558	0.723553	1.51994	1.0522	0.708864	0.654056	2.60001
ENSMUSG00000067341	4.14527	10.8196	2.03197	4.19081	0	116.553	20.0771	5.56663	3.97986	27.3528	4.23753	34.7058	-3.04413	0.00140482	0.156558	H2-Eb2	17	34325665	34340229	+	2209	protein_coding	histocompatibility 2, class II antigen E beta2 [Source:MGI Symbol;Acc:MGI:95902]	-	3	10	3	4	0	120	23	6	4	26	0.0764022	0.199122	0.0355859	0.0750385	0	2.06966	0.366959	0.09983	0.0700431	0.508024
ENSMUSG00000041515	906.432	764.945	727.446	655.862	762.44	2178.56	1323.34	877.673	848.705	1396.05	763.425	1324.86	-0.795659	0.00141106	0.156558	Irf8	8	120736358	120756694	+	7055	protein_coding	interferon regulatory factor 8 [Source:MGI Symbol;Acc:MGI:96395]	IRF	656	707	1074	626	682	2243	1516	946	853	1327	5.23103	4.40796	3.98896	3.67703	4.27004	12.1129	7.57335	4.92833	4.67685	8.11859
ENSMUSG00000096150	0	0	0	0	0	11.6553	0	0	9.94965	39.9772	0	12.3164	-6.01369	0.00141287	0.156558	Ighv1-85	12	116000028	116000461	-	351	IG_V_gene	immunoglobulin heavy variable 1-85 [Source:MGI Symbol;Acc:MGI:3645723]	-	0	0	0	0	0	12	0	0	10	38	0	0	0	0	0	1.30253	0	0	1.10203	4.67286
ENSMUSG00000026249	1196.6	863.403	905.582	1588.32	1405.26	1417.08	1856.69	2173.77	1922.27	1952.57	1191.83	1864.48	-0.646058	0.00142173	0.15666	Serpine2	1	79794197	79861180	-	8287	protein_coding	serine (or cysteine) peptidase inhibitor, clade E, member 2 [Source:MGI Symbol;Acc:MGI:101780]	-	866	798	1337	1516	1257	1459	2127	2343	1932	1856	5.87896	4.23566	4.22753	7.58092	6.70012	6.70768	9.04599	10.3916	9.01801	9.6669
ENSMUSG00000060509	4.14527	20.5572	14.9011	8.38162	13.4154	77.7017	39.2812	20.411	13.9295	73.6422	12.2801	44.9931	-1.85826	0.00144336	0.15773	Xcr1	9	123852315	123862029	-	4453	protein_coding	chemokine (C motif) receptor 1 [Source:MGI Symbol;Acc:MGI:1346338]	-	3	19	22	8	12	80	45	22	14	70	0.0379008	0.187679	0.129456	0.0744487	0.119035	0.684465	0.356161	0.181583	0.121612	0.678503
ENSMUSG00000090958	385.51	469.57	507.993	425.367	323.087	305.95	256.637	327.504	281.575	189.366	422.305	272.206	0.634702	0.00144743	0.15773	Lrrc32	7	98489283	98502181	+	4688	protein_coding	leucine rich repeat containing 32 [Source:MGI Symbol;Acc:MGI:93882]	-	279	434	750	406	289	315	294	353	283	180	3.34809	4.07209	4.19205	3.58887	2.72305	2.55998	2.21027	2.76753	2.33507	1.65726
ENSMUSG00000022534	4.14527	8.65567	3.38662	1.0477	3.35384	42.7359	10.475	16.6999	7.95972	22.0927	4.11782	19.9926	-2.28804	0.00149303	0.161769	Mefv	16	3707218	3718097	-	3251	protein_coding	Mediterranean fever [Source:MGI Symbol;Acc:MGI:1859396]	-	3	8	5	1	3	44	12	18	8	21	0.051914	0.10824	0.0403	0.0127469	0.0407614	0.515644	0.130092	0.203499	0.0951862	0.27881
ENSMUSG00000045441	117.449	98.4582	80.6015	133.058	71.5486	108.782	390.193	212.46	102.481	347.17	100.223	232.217	-1.2143	0.0015009	0.161769	Gprin3	6	59347226	59426294	-	8339	protein_coding	GPRIN family member 3 [Source:MGI Symbol;Acc:MGI:1924785]	-	85	91	119	127	64	112	447	229	103	330	0.573436	0.480002	0.373926	0.631117	0.339009	0.511703	1.88921	1.00932	0.477776	1.70807
ENSMUSG00000016024	2799.44	2078.44	2122.73	2895.85	3231.98	3339.23	5110.92	4872.66	2806.8	4526.89	2625.69	4131.3	-0.654161	0.00153194	0.16339	Lbp	2	158306493	158332852	+	4831	protein_coding	lipopolysaccharide binding protein [Source:MGI Symbol;Acc:MGI:1098776]	-	2026	1921	3134	2764	2891	3438	5855	5252	2821	4303	23.593	17.4906	16.9986	23.7094	26.4336	27.1133	42.7145	39.957	22.5874	38.4451
ENSMUSG00000064354	2507.89	1611.04	2468.17	6571.19	1678.04	1256.82	931.401	1297.95	1885.46	1532.81	2967.26	1380.89	1.10363	0.00153888	0.16339	mt-Co2	MT	7013	7696	+	684	protein_coding	mitochondrially encoded cytochrome c oxidase II [Source:MGI Symbol;Acc:MGI:102503]	-	1815	1489	3644	6272	1501	1294	1067	1399	1895	1457	149.28	95.7534	139.597	379.988	96.9325	72.0763	54.9787	75.1739	107.165	91.9412
ENSMUSG00000039197	1062.57	1128.48	1039.01	1082.28	991.619	1245.17	1350.4	1644.94	1236.74	1552.8	1060.79	1406.01	-0.406523	0.00154079	0.16339	Adk	14	21052574	21448569	+	8526	protein_coding	adenosine kinase [Source:MGI Symbol;Acc:MGI:87930]	-	769	1043	1534	1033	887	1282	1547	1773	1243	1476	5.07412	5.3809	4.71446	5.02082	4.5954	5.72871	6.39486	7.64309	5.63932	7.47218
ENSMUSG00000059994	12.4358	11.9015	8.12789	6.28622	15.6513	270.985	14.8396	4.63886	13.9295	38.9252	10.8805	68.6636	-2.66277	0.00155579	0.164098	Fcrl1	3	87376387	87402934	+	3560	protein_coding	Fc receptor-like 1 [Source:MGI Symbol;Acc:MGI:2442862]	-	9	11	12	6	14	279	17	5	14	37	0.142224	0.135912	0.088325	0.0698427	0.173709	2.98585	0.1683	0.0516209	0.152117	0.448599
ENSMUSG00000045672	200.355	205.572	2170.82	557.378	472.891	128.208	261.002	159.577	180.089	75.7463	721.404	160.924	2.16484	0.00161813	0.16958	Col27a1	4	63214004	63334991	+	13022	protein_coding	collagen, type XXVII, alpha 1 [Source:MGI Symbol;Acc:MGI:2672118]	-	145	190	3205	532	423	132	299	172	181	72	0.626427	0.641788	6.44915	1.69299	1.43485	0.386198	0.809244	0.485463	0.537653	0.23865
ENSMUSG00000031934	118.831	88.7206	142.915	127.82	97.2614	310.807	148.396	124.322	276.6	221.979	115.11	216.421	-0.907564	0.0016307	0.16958	Panx1	9	15002128	15045478	-	6030	protein_coding	pannexin 1 [Source:MGI Symbol;Acc:MGI:1860055]	-	86	82	211	122	87	320	170	134	278	211	0.802345	0.598153	0.91689	0.838421	0.637304	2.02184	0.993614	0.816758	1.78332	1.51033
ENSMUSG00000091957	117.449	94.1304	101.599	122.581	178.871	197.168	226.958	254.21	279.585	131.504	122.926	217.885	-0.828472	0.00163355	0.16958	Rps2-ps10	18	61259008	61259972	-	965	transcribed_processed_pseudogene	ribosomal protein S2, pseudogene 10 [Source:MGI Symbol;Acc:MGI:3645604]	-	85	87	150	117	160	203	260	274	281	125	4.95532	3.96559	4.07302	5.02433	7.32381	8.01462	9.49581	10.4359	11.2637	5.591
ENSMUSG00000020701	20.7263	14.0655	88.0521	10.477	21.241	3.88508	2.61875	5.56663	10.9446	10.5203	30.9124	6.70708	2.2272	0.00165034	0.170207	Tmem132e	11	82388900	82446332	+	4693	protein_coding	transmembrane protein 132E [Source:MGI Symbol;Acc:MGI:2685490]	-	15	13	130	10	19	4	3	6	11	10	0.179813	0.121845	0.725847	0.0883018	0.178833	0.0324731	0.0225298	0.0469901	0.0906657	0.0919721
ENSMUSG00000025902	480.851	531.242	439.583	619.192	526.553	353.543	256.637	386.881	348.238	136.764	519.484	296.413	0.808752	0.00165685	0.170207	Sox17	1	4490931	4497354	-	4772	protein_coding	SRY (sex determining region Y)-box 17 [Source:MGI Symbol;Acc:MGI:107543]	HMG	348	491	649	591	471	364	294	417	350	130	4.1026	4.52581	3.56366	5.13224	4.35979	2.90613	2.17137	3.21175	2.83706	1.17584
ENSMUSG00000030165	6.90878	6.49175	11.5145	18.8586	4.47179	118.495	16.5854	24.1221	10.9446	45.2374	9.64909	43.0769	-2.14705	0.00166606	0.170266	Klrd1	6	129591782	129598775	+	1281	protein_coding	killer cell lectin-like receptor, subfamily D, member 1 [Source:MGI Symbol;Acc:MGI:1196275]	-	5	6	17	18	4	122	19	26	11	43	0.219584	0.206024	0.347738	0.582295	0.137929	3.62848	0.522746	0.745985	0.332158	1.44886
ENSMUSG00000031933	0	3.24588	0	0	7.82563	90.3282	4.36458	13.9166	7.95972	14.7284	2.2143	26.2595	-3.58926	0.00167872	0.170676	Izumo1r	9	14885814	14903949	-	2320	protein_coding	IZUMO1 receptor, JUNO [Source:MGI Symbol;Acc:MGI:1929185]	-	0	3	0	0	7	93	5	15	8	14	0	0.0568786	0	0	0.133277	1.52725	0.075957	0.237634	0.133384	0.260463
ENSMUSG00000091649	109.159	65.9995	99.5666	66.0053	103.969	414.733	103.877	117.827	101.486	400.824	88.9398	227.749	-1.35631	0.001688	0.170739	Phf11b	14	59320964	59341351	-	1184	protein_coding	PHD finger protein 11B [Source:MGI Symbol;Acc:MGI:3645789]	-	79	61	147	63	93	427	119	127	102	381	3.75366	2.26618	3.25325	2.205	3.46957	13.7401	3.54227	3.94237	3.33234	13.8893
ENSMUSG00000099719	424.199	360.292	172.04	161.346	666.296	723.597	870.296	920.35	449.724	907.903	356.835	774.374	-1.11949	0.0017039	0.171468	Gm28802	1	58850085	58892792	-	944	unprocessed_pseudogene	predicted gene 28802 [Source:MGI Symbol;Acc:MGI:5579508]	-	307	333	254	154	596	745	997	992	452	863	18.2956	15.5163	7.0504	6.76034	27.8881	30.0676	37.2228	38.6229	18.5211	39.4589
ENSMUSG00000048232	185.155	135.245	308.182	181.253	178.871	101.983	106.496	149.371	115.416	83.1105	197.741	111.275	0.832949	0.0017258	0.17279	Fbxo10	4	45034247	45084604	-	4691	protein_coding	F-box protein 10 [Source:MGI Symbol;Acc:MGI:2686937]	-	134	125	455	173	160	105	122	161	116	79	1.60701	1.17209	2.54155	1.52827	1.5066	0.852782	0.916601	1.26144	0.956519	0.726889
ENSMUSG00000038576	6.90878	6.49175	118.532	66.0053	3.35384	8.74144	9.60207	0	0.994965	2.10406	40.2583	4.28851	3.23062	0.00174614	0.17349	Susd4	1	182763860	182896591	+	3858	protein_coding	sushi domain containing 4 [Source:MGI Symbol;Acc:MGI:2138351]	-	5	6	175	63	3	9	11	0	1	2	0.0729101	0.0684076	1.18858	0.676703	0.0343482	0.088878	0.100489	0	0.0100263	0.0223756
ENSMUSG00000000682	707.459	418.718	805.338	557.378	550.03	3291.64	1128.68	572.436	538.276	1921.01	607.784	1490.41	-1.29383	0.00175038	0.17349	Cd52	4	134082448	134095082	-	1187	protein_coding	CD52 antigen [Source:MGI Symbol;Acc:MGI:1346088]	-	512	387	1189	532	492	3389	1293	617	541	1826	24.2661	14.3409	26.2472	18.5729	18.3088	108.776	38.3914	19.1047	17.6298	66.3982
ENSMUSG00000004035	149.23	167.704	316.988	104.77	196.759	73.8166	102.131	107.622	106.461	104.151	187.09	98.8363	0.92548	0.00176977	0.174535	Gstm7	3	107926334	107931817	-	1601	protein_coding	glutathione S-transferase, mu 7 [Source:MGI Symbol;Acc:MGI:1915562]	-	108	155	468	100	176	76	117	116	107	99	3.79501	4.25849	7.65961	2.58838	4.85586	1.80857	2.57561	2.66301	2.5852	2.66901
ENSMUSG00000004113	24.8716	19.4753	276.348	57.6236	49.1897	38.8508	12.2208	18.5554	17.9094	16.8325	85.5016	20.8738	2.04255	0.00178426	0.17463	Cacna1b	2	24603887	24763152	-	9942	protein_coding	calcium channel, voltage-dependent, N type, alpha 1B subunit [Source:MGI Symbol;Acc:MGI:88296]	-	18	18	408	55	44	40	14	20	18	16	0.101854	0.0796369	1.07532	0.22925	0.19549	0.153285	0.0496295	0.073937	0.0700325	0.0694629
ENSMUSG00000043592	0	0	0	1.0477	0	26.2243	13.9666	0.927772	0	7.36422	0.209541	9.69659	-5.09447	0.00178845	0.17463	Unc5cl	17	48454901	48539714	+	3224	protein_coding	unc-5 family C-terminal like [Source:MGI Symbol;Acc:MGI:1923839]	-	0	0	0	1	0	27	16	1	0	7	0	0	0	0.0128536	0	0.319068	0.174909	0.0114002	0	0.0937151
ENSMUSG00000025171	544.412	589.667	435.519	510.231	522.081	648.809	682.62	703.252	655.682	744.838	520.382	687.04	-0.402962	0.00180862	0.17573	Ubtd1	19	41981763	42034641	+	1527	protein_coding	ubiquitin domain containing 1 [Source:MGI Symbol;Acc:MGI:2385092]	-	394	545	643	487	467	668	782	758	659	708	14.5157	15.699	11.0338	13.2163	13.509	16.6668	18.049	18.2447	16.6935	20.0125
ENSMUSG00000029658	174.101	133.081	81.2789	99.5317	304.082	183.57	350.039	863.756	175.114	503.923	158.415	415.28	-1.39252	0.00185985	0.179822	Wdr95	5	149528679	149611894	+	3477	protein_coding	WD40 repeat domain 95 [Source:MGI Symbol;Acc:MGI:1923042]	-	126	123	120	95	272	189	401	931	176	479	2.03867	1.55602	0.904334	1.13224	3.45548	2.07096	4.06467	9.84126	1.95798	5.94617
ENSMUSG00000058396	259.77	230.457	220.808	230.495	278.369	133.064	60.2312	229.16	110.441	74.6942	243.98	121.518	1.00456	0.00190632	0.183009	Gpr182	10	127747276	127751732	-	3954	protein_coding	G protein-coupled receptor 182 [Source:MGI Symbol;Acc:MGI:109545]	-	188	213	326	220	249	137	69	247	111	71	2.67486	2.36951	2.1604	2.30572	2.78168	1.32007	0.615033	2.29597	1.08589	0.775047
ENSMUSG00000032578	33.1621	35.7046	46.058	57.6236	20.123	81.5868	70.7061	63.0885	320.379	48.3935	38.5343	116.831	-1.59622	0.00191137	0.183009	Cish	9	107296026	107302784	+	6419	protein_coding	cytokine inducible SH2-containing protein [Source:MGI Symbol;Acc:MGI:103159]	-	24	33	68	55	18	84	81	68	322	46	0.210341	0.226132	0.277584	0.355071	0.123865	0.49857	0.444737	0.389356	1.94039	0.309312
ENSMUSG00000089817	40.0709	73.5732	78.5696	76.4823	38.0102	24.2818	20.0771	44.5331	26.864	23.1447	61.3412	27.7801	1.14922	0.0019414	0.184152	Gm7162	17	12819819	12820842	-	1024	processed_pseudogene	predicted gene 7162 [Source:MGI Symbol;Acc:MGI:3645097]	-	29	68	116	73	34	25	23	48	27	22	1.59323	2.92095	2.96832	2.95422	1.46664	0.930153	0.791615	1.72285	1.01992	0.927319
ENSMUSG00000057606	2.76351	11.9015	9.48253	26.1926	27.9487	88.3857	41.027	28.7609	46.7633	44.1853	15.6578	49.8245	-1.66666	0.001949	0.184152	Colq	14	31523082	31591343	-	3803	protein_coding	collagen-like tail subunit (single strand of homotrimer) of asymmetric acetylcholinesterase [Source:MGI Symbol;Acc:MGI:1338761]	-	2	11	14	25	25	91	47	31	47	42	0.0295858	0.127228	0.0964615	0.272417	0.290374	0.911652	0.43557	0.2996	0.478049	0.476683
ENSMUSG00000027380	24.8716	28.1309	8.80521	11.5247	14.5333	29.1381	48.0103	76.0773	27.859	53.6536	17.5732	46.9477	-1.43874	0.00195132	0.184152	Acoxl	2	127838876	128123873	+	3179	protein_coding	acyl-Coenzyme A oxidase-like [Source:MGI Symbol;Acc:MGI:1921371]	-	18	26	13	11	13	30	55	82	28	51	0.318539	0.359748	0.107153	0.143391	0.180633	0.359538	0.609759	0.948045	0.340697	0.692446
ENSMUSG00000047786	24.8716	46.5242	175.427	50.2897	48.0717	16.5116	15.7125	24.1221	32.8338	26.3008	69.0368	23.0962	1.59279	0.00197823	0.185803	Lix1	17	17402672	17459387	+	3434	protein_coding	limb and CNS expressed 1 [Source:MGI Symbol;Acc:MGI:1913893]	-	18	43	259	48	43	17	18	26	33	25	0.294885	0.550787	1.97629	0.579243	0.553112	0.188609	0.184739	0.278278	0.371719	0.314229
ENSMUSG00000051335	439.398	334.325	182.877	357.267	252.656	177.743	192.914	235.654	153.225	116.776	313.305	175.262	0.834088	0.00206633	0.192884	Gfod1	13	43195245	43304172	-	7208	protein_coding	glucose-fructose oxidoreductase domain containing 1 [Source:MGI Symbol;Acc:MGI:2145304]	-	318	309	270	341	226	183	221	254	154	111	2.48195	1.88564	0.981525	1.96047	1.38496	0.967276	1.0806	1.29516	0.826432	0.664683
ENSMUSG00000056445	16.5811	41.1144	18.2877	28.288	11.1795	6.7989	2.61875	8.34995	6.96475	9.46829	23.0901	6.84013	1.76385	0.00209565	0.192884	Hoxaas2	6	52165674	52169564	+	3361	processed_transcript	Hoxa cluster antisense RNA 2 [Source:MGI Symbol;Acc:MGI:1913890]	-	12	38	27	27	10	7	3	9	7	9	0.20086	0.497314	0.210498	0.332901	0.131424	0.0793494	0.0314586	0.0984192	0.0805621	0.115579
ENSMUSG00000023903	0	5.40979	0	0	0	39.8221	20.95	7.42218	2.98489	7.36422	1.08196	15.7087	-3.88427	0.00209814	0.192884	Mmp25	17	23628311	23645277	-	5303	protein_coding	matrix metallopeptidase 25 [Source:MGI Symbol;Acc:MGI:2443938]	-	0	5	0	0	0	41	24	8	3	7	0	0.0414729	0	0	0	0.294562	0.159505	0.0554465	0.0218827	0.0569748
ENSMUSG00000027525	1.38176	6.49175	62.9911	0	0	0	0	0	0	1.05203	14.1729	0.210406	5.75713	0.00209967	0.192884	Phactr3	2	178118975	178338492	+	6407	protein_coding	phosphatase and actin regulator 3 [Source:MGI Symbol;Acc:MGI:1921439]	-	1	6	93	0	0	0	0	0	0	1	0.00878062	0.0411919	0.380347	0	0	0	0	0	0	0.00673677
ENSMUSG00000052544	46.9797	63.8356	98.2119	79.6254	35.7743	17.4829	21.8229	45.4608	32.8338	22.0927	64.8854	27.9386	1.22246	0.00211519	0.192884	St6galnac3	3	153198266	153725174	-	8994	protein_coding	ST6 (alpha-N-acetyl-neuraminyl-2,3-beta-galactosyl-1,3)-N-acetylgalactosaminide alpha-2,6-sialyltransferase 3 [Source:MGI Symbol;Acc:MGI:1341828]	-	34	59	145	76	32	18	25	49	33	21	0.21267	0.288546	0.422442	0.350171	0.15716	0.0762489	0.0979655	0.200239	0.141926	0.10078
ENSMUSG00000031883	102.25	136.327	98.8893	160.298	81.6101	52.4486	60.2312	64.9441	66.6626	13.6764	115.875	51.5926	1.16479	0.0021206	0.192884	Car7	8	104534689	104550343	+	3637	protein_coding	carbonic anhydrase 7 [Source:MGI Symbol;Acc:MGI:103100]	-	74	126	146	153	73	54	69	70	67	13	1.14464	1.52385	1.05187	1.74328	0.886593	0.565672	0.668639	0.707393	0.712578	0.154279
ENSMUSG00000064339	32686.8	20491.2	34248.9	32669.5	22905.6	15907.5	13039.6	19855.3	17511.4	24885.8	28600.4	18239.9	0.648961	0.00212576	0.192884	mt-Rnr2	MT	1094	2675	+	1582	Mt_rRNA	mitochondrially encoded 16S rRNA [Source:MGI Symbol;Acc:MGI:102492]	-	23656	18939	50565	31182	20489	16378	14938	21401	17600	23655	841.23	526.582	837.521	816.803	572.083	394.429	332.791	497.203	430.336	645.391
ENSMUSG00000007682	135.412	147.146	46.7353	99.5317	34.6563	66.0464	11.3479	10.2055	21.8892	33.665	92.6964	28.6308	1.69476	0.00213783	0.192884	Dio2	12	90724552	90738438	-	5815	protein_coding	deiodinase, iodothyronine, type II [Source:MGI Symbol;Acc:MGI:1338833]	-	98	136	69	95	31	68	13	11	22	32	0.948105	1.02874	0.310922	0.677008	0.235481	0.445526	0.0787915	0.0695262	0.146344	0.237524
ENSMUSG00000062960	1571.06	1605.63	1430.51	1970.73	1276.7	1291.79	823.159	1278.47	983.025	699.601	1570.92	1015.21	0.629655	0.00214163	0.192884	Kdr	5	75932827	75978458	-	9030	protein_coding	kinase insert domain protein receptor [Source:MGI Symbol;Acc:MGI:96683]	-	1137	1484	2112	1881	1142	1330	943	1378	988	665	7.08358	7.22873	6.12856	8.63219	5.58628	5.61149	3.68053	5.60876	4.23224	3.17863
ENSMUSG00000076490	46.9797	22.7211	15.5784	28.288	111.795	472.038	94.2748	58.4497	67.6576	133.608	45.0724	165.206	-1.87866	0.00215762	0.193441	Trbc1	6	41538218	41539881	+	749	TR_C_gene	T cell receptor beta, constant region 1 [Source:MGI Symbol;Acc:MGI:4439726]	-	34	21	23	27	100	486	108	63	68	127	2.55374	1.23326	0.804634	1.49383	5.89743	24.7212	5.08192	3.09147	3.51179	7.31861
ENSMUSG00000058656	160.284	70.3273	240.45	195.92	25.7128	90.3282	24.4416	35.2554	47.7583	29.4569	138.539	45.4481	1.61043	0.00217126	0.193783	Samd12	15	53453810	53902537	-	9283	protein_coding	sterile alpha motif domain containing 12 [Source:MGI Symbol;Acc:MGI:2444518]	-	116	65	355	187	23	93	28	38	48	28	0.702991	0.307993	1.00206	0.834782	0.109442	0.381688	0.106305	0.150453	0.200011	0.13019
ENSMUSG00000078921	127.121	120.097	90.7614	124.677	134.154	567.222	127.446	202.254	119.396	352.431	119.362	273.75	-1.19865	0.00220202	0.195643	Tgtp2	11	49057194	49064206	-	2938	protein_coding	T cell specific GTPase 2 [Source:MGI Symbol;Acc:MGI:3710083]	-	92	111	134	119	120	584	146	218	120	335	1.76164	1.66183	1.1951	1.67848	1.80416	7.57313	1.75141	2.72716	1.5799	4.92152
ENSMUSG00000025347	74.6148	27.049	31.1569	45.0512	131.918	155.403	172.837	194.832	91.5368	131.504	61.9579	149.223	-1.27549	0.00221268	0.195708	Mettl7b	10	128958274	128960988	-	1230	protein_coding	methyltransferase like 7B [Source:MGI Symbol;Acc:MGI:1918914]	-	54	25	46	43	118	160	198	210	92	125	2.46984	0.894027	0.979952	1.44872	4.23762	4.95597	5.67343	6.27509	2.89324	4.38643
ENSMUSG00000096802	11.054	33.5407	31.1569	28.288	16.7692	52.4486	58.4853	22.2665	70.6425	134.66	24.1618	67.7006	-1.47273	0.00235104	0.206396	Gm15433	1	84963669	84964559	+	891	processed_pseudogene	predicted pseudogene 15433 [Source:MGI Symbol;Acc:MGI:3705860]	-	8	31	46	27	15	54	67	24	71	128	0.505117	1.53038	1.3528	1.25576	0.743632	2.30903	2.65023	0.990009	3.08235	6.20067
ENSMUSG00000039004	496.05	593.995	300.054	535.376	257.128	259.329	165.854	206.893	359.182	117.828	436.521	221.817	0.975944	0.00236521	0.206396	Bmp6	13	38345107	38500302	+	3900	protein_coding	bone morphogenetic protein 6 [Source:MGI Symbol;Acc:MGI:88182]	-	359	549	443	511	230	267	190	223	361	112	5.17857	6.19189	2.9764	5.4297	2.605	2.60832	1.71702	2.10158	3.5805	1.23954
ENSMUSG00000113918	20.7263	16.2294	20.997	12.5724	19.0051	52.4486	53.2478	54.7386	19.8993	31.561	17.9061	42.3791	-1.24399	0.00237145	0.206396	Gm6566	12	87149475	87155486	-	1171	antisense	predicted gene 6566 [Source:MGI Symbol;Acc:MGI:3647745]	-	15	15	31	12	17	54	61	59	20	30	0.720633	0.563443	0.693677	0.424663	0.641264	1.75692	1.83594	1.85183	0.660654	1.10579
ENSMUSG00000029103	3491.7	3642.95	2767.54	2788.98	3590.85	4191.04	4862.14	5965.58	3310.25	5680.97	3256.4	4801.99	-0.560557	0.00238104	0.206396	Lrpap1	5	35091501	35105766	-	4116	protein_coding	low density lipoprotein receptor-related protein associated protein 1 [Source:MGI Symbol;Acc:MGI:96829]	-	2527	3367	4086	2662	3212	4315	5570	6430	3327	5400	34.539	35.9818	26.0121	26.8011	34.4703	39.9411	47.6942	57.4171	31.2664	56.6272
ENSMUSG00000042190	1029.41	1499.59	778.245	1309.63	1681.39	1420	2898.08	3975.5	1251.67	2589.05	1259.65	2426.86	-0.946336	0.00238584	0.206396	Cmklr1	5	113612354	113650426	-	3408	protein_coding	chemokine-like receptor 1 [Source:MGI Symbol;Acc:MGI:109603]	-	745	1386	1149	1250	1504	1462	3320	4285	1258	2461	12.2981	17.8887	8.83431	15.1995	19.4936	16.3441	34.334	46.2122	14.2785	31.1687
ENSMUSG00000029821	290.169	240.195	124.628	193.825	238.123	396.279	374.481	364.615	299.484	315.61	217.388	350.094	-0.693642	0.00241091	0.207553	Gsdme	6	50188888	50263862	-	12742	protein_coding	gasdermin E [Source:MGI Symbol;Acc:MGI:1889850]	-	210	222	184	185	213	408	429	393	301	300	0.927175	0.766357	0.378384	0.601664	0.738391	1.21994	1.1866	1.1336	0.913755	1.01623
ENSMUSG00000034981	790.364	968.353	1397.32	872.736	614.871	731.367	609.295	504.708	525.341	546.004	928.729	583.343	0.672235	0.00242026	0.207553	Parm1	5	91517615	91626894	+	5068	protein_coding	prostate androgen-regulated mucin-like protein 1 [Source:MGI Symbol;Acc:MGI:2443349]	-	572	895	2063	833	550	753	698	544	528	519	6.3495	7.76787	10.6663	6.81127	4.7937	5.66073	4.85406	3.94519	4.02994	4.42015
ENSMUSG00000073409	985.192	1032.19	889.326	1100.09	1568.48	4712.61	2110.71	1249.71	1437.72	1598.04	1115.05	2221.76	-0.994719	0.00246618	0.20928	H2-Q6	17	35424850	35430055	+	2085	protein_coding	histocompatibility 2, Q region locus 6 [Source:MGI Symbol;Acc:MGI:95935]	-	713	954	1313	1050	1403	4852	2418	1347	1445	1519	19.2382	20.126	16.501	20.8691	29.7232	88.6603	40.873	23.7447	26.8079	31.4455
ENSMUSG00000000838	3450.24	2954.83	2701.17	3389.32	5733.95	4989.42	8334.59	6814.49	4066.42	6219.61	3645.9	6084.91	-0.739115	0.00247137	0.20928	Fmr1	X	68678541	68717963	+	8966	protein_coding	fragile X mental retardation 1 [Source:MGI Symbol;Acc:MGI:95564]	-	2497	2731	3988	3235	5129	5137	9548	7345	4087	5912	15.6675	13.398	11.6549	14.9519	25.2684	21.8286	37.5318	30.1092	17.6322	28.4605
ENSMUSG00000104399	58.0337	57.3438	67.7324	55.5282	57.0153	27.1956	39.2812	28.7609	36.8137	11.5723	59.1307	28.7248	1.03884	0.00247223	0.20928	Gm37963	9	108389082	108390205	+	613	sense_intronic	predicted gene, 37963 [Source:MGI Symbol;Acc:MGI:5611191]	-	42	53	100	53	51	28	45	31	37	11	3.85451	3.80304	4.27456	3.5829	3.67497	1.74025	2.58725	1.85869	2.33476	0.774531
ENSMUSG00000075010	721.276	701.109	370.496	471.466	787.035	2044.53	1007.34	783.04	689.511	1252.97	610.276	1155.48	-0.92188	0.0025319	0.213416	AW112010	19	11047617	11050566	-	770	lincRNA	expressed sequence AW112010 [Source:MGI Symbol;Acc:MGI:2147706]	-	522	648	547	450	704	2105	1154	844	693	1191	38.1382	37.0169	18.6144	24.2182	40.3856	104.154	52.8203	40.2863	34.8132	66.7617
ENSMUSG00000089877	2.76351	0	0	0	0	3.88508	11.3479	8.34995	5.96979	5.26016	0.552702	6.96258	-4.01867	0.00255859	0.214748	Gm16102	1	44644279	44644698	+	420	processed_pseudogene	predicted gene 16102 [Source:MGI Symbol;Acc:MGI:3802041]	-	2	0	0	0	0	4	13	9	6	5	0.267893	0	0	0	0	0.362848	1.09089	0.787588	0.55259	0.513839
ENSMUSG00000027636	1.38176	7.57371	3.38662	5.23851	4.47179	67.0177	6.98332	12.9888	8.95468	16.8325	4.41048	22.5554	-2.34639	0.00259029	0.216431	Sla2	2	156872457	156887192	-	3099	protein_coding	Src-like-adaptor 2 [Source:MGI Symbol;Acc:MGI:1925049]	-	1	7	5	5	4	69	8	14	9	16	0.0181534	0.0993555	0.0422767	0.0668603	0.0570142	0.848285	0.0909818	0.16604	0.112337	0.222846
ENSMUSG00000061740	610.736	651.339	911	813.017	911.127	438.043	479.23	669.852	594.989	422.917	779.444	521.006	0.58201	0.00260086	0.216431	Cyp2d22	15	82370527	82380260	-	3909	protein_coding	cytochrome P450, family 2, subfamily d, polypeptide 22 [Source:MGI Symbol;Acc:MGI:1929474]	-	442	602	1345	776	815	451	549	722	598	402	6.36117	6.77402	9.0159	8.22652	9.20951	4.39567	4.94986	6.78855	5.91748	4.43881
ENSMUSG00000001467	852.543	877.468	542.536	689.388	988.265	1205.35	1291.91	1361.04	789.007	1624.34	790.04	1254.33	-0.667899	0.00261158	0.216431	Cyp51	5	4081145	4104746	-	4415	protein_coding	cytochrome P450, family 51 [Source:MGI Symbol;Acc:MGI:106040]	-	617	811	801	658	884	1241	1480	1467	793	1544	7.86203	8.0799	4.75394	6.17611	8.84435	10.7092	11.8145	12.2125	6.94774	15.0947
ENSMUSG00000100910	2.76351	1.08196	12.8692	8.38162	14.5333	0	0	0	1.98993	0	7.92591	0.397986	4.34083	0.00267722	0.219559	Gm29128	1	31136026	31150105	+	2858	antisense	predicted gene 29128 [Source:MGI Symbol;Acc:MGI:5579834]	-	2	1	19	8	13	0	0	0	2	0	0.0393684	0.0153905	0.174198	0.115997	0.200921	0	0	0	0.0270688	0
ENSMUSG00000111067	9.67229	3.24588	6.77324	11.5247	0	0	0	0	0	0	6.24323	0	5.13996	0.00268517	0.219559	Gm48714	10	19873007	19874447	-	1441	TEC	predicted gene, 48714 [Source:MGI Symbol;Acc:MGI:6098361]	-	7	3	10	11	0	0	0	0	0	0	0.273284	0.0915741	0.18184	0.316336	0	0	0	0	0	0
ENSMUSG00000091307	5.52702	10.8196	0.677324	8.38162	5.58973	20.3967	28.8062	38.9664	7.95972	26.3008	6.19906	24.486	-2.011	0.00268898	0.219559	Gm8895	12	103867846	103881511	-	1223	unprocessed_pseudogene	predicted gene 8895 [Source:MGI Symbol;Acc:MGI:3643891]	-	4	10	1	8	5	21	33	42	8	25	0.183998	0.359658	0.0214252	0.271071	0.180588	0.654195	0.950985	1.2622	0.253026	0.882308
ENSMUSG00000021365	616.263	596.159	667.841	1026.75	705.424	1131.53	1705.68	884.167	810.896	1404.46	722.487	1187.35	-0.716621	0.00269384	0.219559	Nedd9	13	41309581	41487362	-	6376	protein_coding	neural precursor cell expressed, developmentally down-regulated gene 9 [Source:MGI Symbol;Acc:MGI:97302]	-	446	551	986	980	631	1165	1954	953	815	1335	3.9352	3.80118	4.05211	6.36939	4.37145	6.96132	10.801	5.49352	4.94436	9.03732
ENSMUSG00000004698	337.148	267.244	178.813	228.399	211.292	348.686	400.668	362.759	301.474	523.912	244.579	387.5	-0.667913	0.00270674	0.219702	Hdac9	12	34047580	34917095	-	14665	protein_coding	histone deacetylase 9 [Source:MGI Symbol;Acc:MGI:1931221]	-	244	247	264	218	189	359	459	391	303	498	0.936026	0.74085	0.471709	0.616019	0.569278	0.932667	1.1031	0.979942	0.799211	1.46573
ENSMUSG00000028874	55.2702	45.4423	58.9272	59.719	44.7179	243.789	82.9269	71.4385	59.6979	135.712	52.8153	118.713	-1.1665	0.00273734	0.221276	Fgr	4	132974095	133001910	+	3863	protein_coding	FGR proto-oncogene, Src family tyrosine kinase [Source:MGI Symbol;Acc:MGI:95527]	-	40	42	87	57	40	251	95	77	60	129	0.582526	0.478234	0.590129	0.611463	0.457383	2.4755	0.866732	0.732608	0.600797	1.44136
ENSMUSG00000109237	33.1621	15.1474	15.5784	18.8586	23.4769	5.82763	4.36458	6.49441	10.9446	8.41625	21.2447	7.2095	1.55306	0.00276773	0.222819	9130214F15Rik	8	24506430	24508082	+	1653	TEC	RIKEN cDNA 9130214F15 gene [Source:MGI Symbol;Acc:MGI:1924373]	-	24	14	23	18	21	6	5	7	11	8	0.816805	0.372538	0.364592	0.451252	0.561166	0.138291	0.106606	0.155643	0.257407	0.208893
ENSMUSG00000064370	265384	272820	232342	282891	206232	160768	119805	171704	229502	185157	251934	173387	0.539051	0.00280181	0.224646	mt-Cytb	MT	14145	15288	+	1144	protein_coding	mitochondrially encoded cytochrome b [Source:MGI Symbol;Acc:MGI:102501]	-	192063	252154	343029	270011	184474	165523	137247	185071	230663	175999	9444.91	9695.17	7857.01	9780.82	7122.85	5512.47	4228.27	5945.91	7799.25	6640.35
ENSMUSG00000021294	357.875	503.111	547.278	494.516	375.63	234.076	195.533	364.615	320.379	95.7349	455.682	242.067	0.913033	0.00281667	0.224923	Kif26a	12	112146208	112181747	+	6918	protein_coding	kinesin family member 26A [Source:MGI Symbol;Acc:MGI:2447072]	-	259	465	808	472	336	241	224	393	322	91	2.1062	2.95657	3.06043	2.82736	2.14538	1.32724	1.14118	2.08794	1.80043	0.567763
ENSMUSG00000051457	106.395	124.425	100.921	73.3392	99.4973	556.538	231.323	84.4273	103.476	250.384	100.916	245.23	-1.28118	0.00288058	0.22821	Spn	7	127132232	127137823	-	4681	protein_coding	sialophorin [Source:MGI Symbol;Acc:MGI:98384]	-	77	115	149	70	89	573	265	91	104	238	0.925406	1.08062	0.834065	0.619697	0.839839	4.6637	1.99523	0.71451	0.859401	2.19455
ENSMUSG00000030849	117.449	221.801	1165.67	305.929	213.528	241.847	164.981	88.1384	123.376	86.2666	404.876	140.922	1.5246	0.00288098	0.22821	Fgfr2	7	130162451	133123350	-	10328	protein_coding	fibroblast growth factor receptor 2 [Source:MGI Symbol;Acc:MGI:95523]	-	85	205	1721	292	191	249	189	95	124	82	0.463002	0.873078	4.36633	1.17162	0.816887	0.918538	0.644958	0.338075	0.464415	0.342692
ENSMUSG00000086669	5.52702	3.24588	0	0	0	6.7989	15.7125	20.411	7.95972	15.7805	1.75458	13.3325	-3.04993	0.00292568	0.229121	AA645442	2	27326704	27331297	+	285	antisense	expressed sequence AA645442 [Source:MGI Symbol;Acc:MGI:3035071]	-	4	3	0	0	0	7	18	22	8	15	0.789578	0.463012	0	0	0	0.935766	2.22594	2.83716	1.08579	2.27171
ENSMUSG00000062328	882.942	974.845	1872.8	1126.28	1324.77	4084.2	1808.68	1943.68	1054.66	3170.82	1236.33	2412.41	-0.963839	0.00292774	0.229121	Rpl17	18	75000477	75003381	+	775	protein_coding	ribosomal protein L17 [Source:MGI Symbol;Acc:MGI:2448270]	-	639	901	2765	1075	1185	4205	2072	2095	1060	3014	46.3852	51.1374	93.4858	57.4813	67.54	206.718	94.2267	99.3546	52.906	167.86
ENSMUSG00000024675	20.7263	17.3113	32.5115	15.7155	36.8922	300.123	52.3749	13.9166	20.8943	105.203	24.6314	98.5023	-1.99614	0.00293145	0.229121	Ms4a4c	19	11404770	11427246	+	1751	protein_coding	membrane-spanning 4-domains, subfamily A, member 4C [Source:MGI Symbol;Acc:MGI:1927656]	-	15	16	48	15	33	309	60	15	21	100	0.481931	0.401929	0.718302	0.354997	0.832477	6.72336	1.20768	0.314855	0.46391	2.46502
ENSMUSG00000010154	8.29053	7.57371	88.7294	38.765	16.7692	14.5691	0.872915	3.71109	4.97482	6.31219	32.0256	6.08802	2.41271	0.00293893	0.229121	Spire2	8	123332713	123369515	+	2510	protein_coding	spire type actin nucleation factor 2 [Source:MGI Symbol;Acc:MGI:2446256]	-	6	7	131	37	15	15	1	4	5	6	0.13448	0.12267	1.36757	0.610869	0.263975	0.227684	0.0140415	0.0585723	0.0770544	0.103177
ENSMUSG00000037225	308.131	327.833	264.834	320.597	294.02	368.112	393.685	424.92	383.061	417.657	303.083	397.487	-0.393613	0.0029578	0.229684	Fgf2	3	37348346	37410108	+	6782	protein_coding	fibroblast growth factor 2 [Source:MGI Symbol;Acc:MGI:95516]	-	223	303	391	306	263	379	451	458	385	397	1.84981	1.96517	1.51068	1.86975	1.71294	2.1291	2.34371	2.48207	2.19586	2.52662
ENSMUSG00000022096	987.955	1449.82	707.126	2138.36	1503.64	1653.1	3076.15	3709.23	1871.53	2246.09	1357.38	2511.22	-0.887817	0.00299025	0.230527	Hr	14	70552212	70573548	+	6919	protein_coding	hairless [Source:MGI Symbol;Acc:MGI:96223]	-	715	1340	1044	2041	1345	1702	3524	3998	1881	2135	5.81357	8.51877	3.95375	12.2242	8.58665	9.37196	17.9506	21.2376	10.5159	13.3187
ENSMUSG00000085887	13.8176	3.24588	11.5145	7.33392	14.5333	58.2763	18.3312	39.8942	11.9396	34.717	10.089	32.6317	-1.69722	0.00299204	0.230527	Arhgap27os3	11	103344753	103350124	+	2729	antisense	Rho GTPase activating protein 27, opposite strand 3 [Source:MGI Symbol;Acc:MGI:3650159]	-	10	3	17	7	13	60	21	43	12	33	0.206147	0.0483541	0.163229	0.106295	0.210419	0.837649	0.271208	0.579123	0.17009	0.521936
ENSMUSG00000085442	478.087	487.963	575.048	500.802	643.937	879	715.79	732.012	831.791	585.982	537.168	748.915	-0.478667	0.00303524	0.231062	Gm3362	15	37943327	37943792	-	466	processed_pseudogene	predicted pseudogene 3362 [Source:MGI Symbol;Acc:MGI:3781540]	-	346	451	849	478	576	905	820	789	836	557	41.7706	42.5703	47.7391	42.5071	54.5986	73.9907	62.0175	62.2296	69.3939	51.5912
ENSMUSG00000024353	4.14527	34.6227	10.1599	33.5265	21.241	1082.97	121.335	1.85554	34.8238	46.2894	20.7391	257.454	-3.63351	0.00304319	0.231062	Mzb1	18	35647266	35649367	-	905	protein_coding	marginal zone B and B1 cell-specific protein 1 [Source:MGI Symbol;Acc:MGI:1917066]	-	3	32	15	32	19	1115	139	2	35	44	0.186489	1.55531	0.434305	1.46528	0.927363	46.9397	5.41318	0.0812245	1.49596	2.09851
ENSMUSG00000041202	95.3411	99.5402	83.9881	88.007	30.1846	482.722	99.5123	173.493	105.466	142.024	79.4122	200.644	-1.33722	0.0030474	0.231062	Pla2g2d	4	138775735	138782046	+	2243	protein_coding	phospholipase A2, group IID [Source:MGI Symbol;Acc:MGI:1341796]	-	69	92	124	84	27	497	114	187	106	135	1.73061	1.80416	1.44859	1.55192	0.531715	8.44192	1.79127	3.06421	1.82801	2.59783
ENSMUSG00000050919	294.314	386.259	244.514	447.369	264.953	168.03	140.539	305.237	179.094	157.805	327.482	190.141	0.783488	0.00305366	0.231062	Zfp366	13	99184823	99250656	+	6382	protein_coding	zinc finger protein 366 [Source:MGI Symbol;Acc:MGI:2178429]	zf-C2H2	213	357	361	427	237	173	161	329	180	150	1.8776	2.46052	1.48219	2.77262	1.64035	1.03277	0.889109	1.89472	1.09098	1.01447
ENSMUSG00000115439	17.9628	7.57371	10.1599	15.7155	40.2461	41.7647	43.6458	73.294	29.8489	57.8617	18.3316	49.283	-1.43919	0.00305948	0.231062	Gm36107	14	106265292	106271248	+	426	lincRNA	predicted gene, 36107 [Source:MGI Symbol;Acc:MGI:5595266]	-	13	7	15	15	36	43	50	79	30	55	1.71678	0.722777	0.922644	1.45916	3.73282	3.84568	4.13663	6.8159	2.72403	5.57262
ENSMUSG00000033730	58.0337	43.2783	44.7034	20.9541	13.4154	138.892	64.5957	59.3774	62.6828	105.203	36.077	86.1502	-1.25731	0.00307715	0.231062	Egr3	14	70077203	70082614	+	4406	protein_coding	early growth response 3 [Source:MGI Symbol;Acc:MGI:1306780]	zf-C2H2	42	40	66	20	12	143	74	64	63	100	0.536272	0.399329	0.392511	0.188107	0.120304	1.23653	0.591934	0.533877	0.553092	0.97963
ENSMUSG00000078763	13.8176	29.2129	8.12789	16.7632	7.82563	180.656	33.1708	2.78332	27.859	108.359	15.1494	70.5658	-2.22293	0.00308098	0.231062	Slfn1	11	83116849	83122670	+	1864	protein_coding	schlafen 1 [Source:MGI Symbol;Acc:MGI:1313259]	-	10	27	12	16	7	186	38	3	28	103	0.30181	0.637138	0.168689	0.355708	0.165881	3.80173	0.718495	0.0591536	0.58105	2.38505
ENSMUSG00000046470	1062.57	957.533	799.919	743.869	719.958	687.66	453.916	662.43	559.17	300.881	856.77	532.811	0.684521	0.00312447	0.233435	Sox18	2	181669836	181671640	-	1620	protein_coding	SRY (sex determining region Y)-box 18 [Source:MGI Symbol;Acc:MGI:103559]	HMG	769	885	1181	710	644	708	520	714	562	286	26.7049	24.0295	19.1024	18.162	17.5596	16.6507	11.3129	16.199	13.4191	7.62004
ENSMUSG00000031871	3448.86	3585.61	2651.05	3970.79	2332.04	2434.98	1401.03	2360.25	2263.54	997.326	3197.67	1891.43	0.757424	0.00314806	0.234311	Cdh5	8	104101625	104144511	+	4203	protein_coding	cadherin 5 [Source:MGI Symbol;Acc:MGI:105057]	-	2496	3314	3914	3790	2086	2507	1605	2544	2275	948	33.4091	34.6824	24.4013	37.368	21.923	22.7253	13.4587	22.2466	20.9374	9.73544
ENSMUSG00000034266	34.5439	43.2783	23.7063	34.5742	51.4256	269.042	58.4853	39.8942	46.7633	113.619	37.5057	105.561	-1.49586	0.00318926	0.236485	Batf	12	85686669	85709087	+	1406	protein_coding	basic leucine zipper transcription factor, ATF-like [Source:MGI Symbol;Acc:MGI:1859147]	TF_bZIP	25	40	35	33	46	277	67	43	47	108	1.00031	1.25138	0.652281	0.972632	1.44516	7.506	1.67948	1.12406	1.29304	3.31547
ENSMUSG00000096108	0	0	0	5.23851	0	20.3967	4.36458	2.78332	39.7986	7.36422	1.0477	14.9415	-3.83634	0.00321865	0.237069	Ighv11-2	12	114048241	114048812	-	461	IG_V_gene	immunoglobulin heavy variable V11-2 [Source:MGI Symbol;Acc:MGI:4947968]	-	0	0	0	5	0	21	5	3	40	7	0	0	0	0.449458	0	1.73553	0.382257	0.239181	3.35629	0.655396
ENSMUSG00000115240	62.179	32.4588	31.1569	22.0018	102.851	93.242	139.666	173.493	91.5368	87.3186	50.1295	117.051	-1.23184	0.00322118	0.237069	Gm5144	15	11906519	11907464	+	946	bidirectional_promoter_lncRNA	predicted gene 5144 [Source:MGI Symbol;Acc:MGI:3779468]	-	45	30	46	21	92	96	160	187	92	83	2.67609	1.39491	1.27415	0.919916	4.29577	3.86629	5.96094	7.26534	3.76182	3.78698
ENSMUSG00000031444	38.6892	54.0979	34.5435	50.2897	30.1846	67.0177	81.1811	61.233	63.6777	112.567	41.561	77.1354	-0.893086	0.0032391	0.237099	F10	8	13037308	13056676	+	2731	protein_coding	coagulation factor X [Source:MGI Symbol;Acc:MGI:103107]	-	28	50	51	48	27	69	93	66	64	107	0.576788	0.805312	0.489329	0.728349	0.436703	0.962591	1.20018	0.888235	0.906482	1.6911
ENSMUSG00000098428	136.794	11.9015	4.74127	8.38162	91.6716	8.74144	6.11041	10.2055	14.9245	9.46829	50.698	9.89002	2.35218	0.00324563	0.237099	Gm2260	14	26016431	26025837	+	657	unprocessed_pseudogene	predicted gene 2260 [Source:MGI Symbol;Acc:MGI:3780429]	-	99	11	7	8	82	9	7	11	15	9	8.47715	0.736449	0.27918	0.504597	5.51306	0.521905	0.375508	0.615365	0.883135	0.591267
ENSMUSG00000020175	30.3986	33.5407	526.281	86.9593	14.5333	36.9083	37.5354	18.5554	37.8087	24.1967	138.343	31.0009	2.16217	0.00326261	0.237411	Rab36	10	75037058	75054748	+	6175	protein_coding	RAB36, member RAS oncogene family [Source:MGI Symbol;Acc:MGI:1924127]	-	22	31	777	83	13	38	43	20	38	23	0.200431	0.220821	3.29713	0.557007	0.0929932	0.234456	0.245424	0.119042	0.238039	0.160767
ENSMUSG00000024538	1010.06	1074.38	663.1	816.16	918.952	1108.22	1207.24	1361.97	1218.83	1279.27	896.532	1235.11	-0.463795	0.00327397	0.237411	Ppic	18	53406341	53418007	-	1286	protein_coding	peptidylprolyl isomerase C [Source:MGI Symbol;Acc:MGI:97751]	-	731	993	979	779	822	1141	1383	1468	1225	1216	31.9784	33.9644	19.9478	25.1025	28.2342	33.8033	37.9024	41.9557	36.8465	40.8131
ENSMUSG00000027863	45.5979	61.6716	48.7673	39.8127	43.5999	473.98	60.2312	64.0163	42.7835	111.515	47.8899	150.505	-1.65149	0.00331334	0.238394	Cd2	3	101275899	101287939	-	1741	protein_coding	CD2 antigen [Source:MGI Symbol;Acc:MGI:88320]	-	33	57	72	38	39	488	69	69	43	106	1.06634	1.4401	1.08364	0.904492	0.989488	10.6791	1.39681	1.45665	0.955368	2.62793
ENSMUSG00000021217	111.922	107.114	132.755	117.343	117.384	45.6497	94.2748	75.1496	61.6878	81.0064	117.304	71.5537	0.71414	0.00331927	0.238394	Tshz3	7	36698118	36773553	+	5456	protein_coding	teashirt zinc finger family member 3 [Source:MGI Symbol;Acc:MGI:2442819]	zf-C2H2	81	99	196	112	105	47	108	81	62	77	0.8352	0.798135	0.941313	0.850675	0.850079	0.328199	0.697646	0.545653	0.43956	0.609148
ENSMUSG00000032017	15.1993	3.24588	95.5027	4.19081	2.23589	0	5.23749	1.85554	3.97986	2.10406	24.0749	2.63539	3.19768	0.00333076	0.238394	Grik4	9	42518135	42944493	-	5962	protein_coding	glutamate receptor, ionotropic, kainate 4 [Source:MGI Symbol;Acc:MGI:95817]	-	11	3	141	4	2	0	6	2	4	2	0.103796	0.0221332	0.619697	0.0278028	0.0148178	0	0.0354687	0.0123295	0.0259519	0.0144792
ENSMUSG00000026904	1.38176	5.40979	134.11	40.8604	0	1.94254	0	0	0	2.10406	36.3524	0.809321	5.51085	0.00333588	0.238394	Slc4a10	2	62046462	62326730	+	6424	protein_coding	solute carrier family 4, sodium bicarbonate cotransporter-like, member 10 [Source:MGI Symbol;Acc:MGI:2150150]	-	1	5	198	39	0	2	0	0	0	2	0.00875739	0.0342358	0.807629	0.251582	0	0.0118615	0	0	0	0.0134379
ENSMUSG00000040146	268.061	319.178	488.35	375.078	405.815	237.961	164.108	330.287	227.847	153.597	371.296	222.76	0.738896	0.00335976	0.239234	Rgl3	9	21968711	21989446	-	3924	protein_coding	ral guanine nucleotide dissociation stimulator-like 3 [Source:MGI Symbol;Acc:MGI:1918996]	-	194	295	721	358	363	245	188	356	229	146	2.78133	3.30681	4.81458	3.78071	4.08622	2.37876	1.68855	3.33447	2.25739	1.60594
ENSMUSG00000064358	1521.31	3237.22	1637.77	4764.95	1405.26	936.305	893.865	1362.9	1266.59	1863.15	2513.3	1264.56	0.991072	0.00337395	0.23938	mt-Co3	MT	8607	9390	+	784	protein_coding	mitochondrially encoded cytochrome c oxidase III [Source:MGI Symbol;Acc:MGI:102502]	-	1101	2992	2418	4548	1257	964	1024	1469	1273	1771	79.0044	167.865	80.8151	240.394	70.8213	46.8463	46.0331	68.867	62.8078	97.501
ENSMUSG00000045467	13.8176	15.1474	37.2528	32.4788	21.241	6.7989	4.36458	12.061	9.94965	8.41625	23.9875	8.31808	1.54589	0.00342708	0.241734	Ttll13	7	80246376	80260821	+	4321	protein_coding	tubulin tyrosine ligase-like family, member 13 [Source:MGI Symbol;Acc:MGI:1920845]	-	10	14	55	31	19	7	5	13	10	8	0.130195	0.142515	0.333527	0.297302	0.194229	0.0617203	0.0407823	0.110577	0.0895193	0.079912
ENSMUSG00000024910	29.0169	22.7211	23.029	31.4311	36.8922	202.996	29.6791	49.1719	59.6979	50.4975	28.6181	78.4084	-1.45657	0.00343163	0.241734	Ctsw	19	5465240	5468498	-	1232	protein_coding	cathepsin W [Source:MGI Symbol;Acc:MGI:1338045]	-	21	21	34	30	33	209	34	53	60	48	0.958934	0.749763	0.723137	1.00909	1.18317	6.46323	0.972645	1.58114	1.88383	1.68166
ENSMUSG00000085873	1.38176	0	46.058	10.477	0	0	0.872915	0	0	0	11.5834	0.174583	5.46711	0.00345417	0.242456	Ttc39aos1	4	109403794	109406155	-	858	antisense	Ttc39a opposite strand RNA 1 [Source:MGI Symbol;Acc:MGI:3651956]	-	1	0	68	10	0	0	1	0	0	0	0.0655681	0	2.0767	0.482984	0	0	0.041077	0	0	0
ENSMUSG00000027347	34.5439	32.4588	31.1569	37.7173	23.4769	263.214	42.7728	52.883	31.8389	75.7463	31.8707	93.2911	-1.54958	0.0034778	0.243248	Rasgrp1	2	117279993	117343001	-	5600	protein_coding	RAS guanyl releasing protein 1 [Source:MGI Symbol;Acc:MGI:1314635]	-	25	30	46	36	21	271	49	57	32	72	0.251149	0.23564	0.21524	0.2664	0.165644	1.84372	0.308386	0.374104	0.221036	0.554946
ENSMUSG00000053318	107.777	101.704	111.081	56.5759	96.1434	543.912	163.235	93.705	95.5166	261.956	94.6563	231.665	-1.29079	0.00350679	0.24441	Slamf8	1	172581758	172590568	-	3079	protein_coding	SLAM family member 8 [Source:MGI Symbol;Acc:MGI:1921998]	-	78	94	164	54	86	560	187	101	96	249	1.42516	1.34287	1.39568	0.726782	1.23377	6.92935	2.14051	1.20564	1.20604	3.49057
ENSMUSG00000068606	30.3986	32.4588	8.12789	56.5759	16.7692	262.243	21.8229	47.3164	45.7684	142.024	28.8661	103.835	-1.85152	0.0035346	0.24548	Gm4841	18	60268301	60273267	-	2838	protein_coding	predicted gene 4841 [Source:MGI Symbol;Acc:MGI:3643814]	-	22	30	12	54	15	270	25	51	46	135	0.436104	0.464969	0.110795	0.788499	0.233466	3.62465	0.310466	0.660486	0.62697	2.05318
ENSMUSG00000024044	35.9256	43.2783	509.347	111.056	17.8871	58.2763	30.552	18.5554	35.8187	32.613	143.499	35.1631	2.03375	0.00359119	0.248352	Epb41l3	17	69075683	69289989	+	11919	protein_coding	erythrocyte membrane protein band 4.1 like 3 [Source:MGI Symbol;Acc:MGI:103008]	-	26	40	752	106	16	60	35	20	36	31	0.12272	0.147617	1.65322	0.368541	0.0592959	0.19179	0.103494	0.0616731	0.116833	0.112261
ENSMUSG00000085603	5.52702	3.24588	0.677324	1.0477	5.58973	106.84	8.72915	0	10.9446	13.6764	3.21753	28.038	-3.15817	0.00360113	0.248352	Gm11346	13	24596347	24604925	-	4098	transcribed_processed_pseudogene	predicted gene 11346 [Source:MGI Symbol;Acc:MGI:1923274]	-	4	3	1	1	5	110	10	0	11	13	0.0549121	0.0322007	0.00639411	0.0101123	0.0538943	1.02267	0.0860031	0	0.10383	0.136923
ENSMUSG00000085786	13.8176	3.24588	0.677324	5.23851	3.35384	118.495	14.8396	1.85554	9.94965	26.3008	5.26662	34.2881	-2.74276	0.00363429	0.248995	Gm15987	6	128951204	128975029	-	2231	antisense	predicted gene 15987 [Source:MGI Symbol;Acc:MGI:3801849]	-	10	3	1	5	3	122	17	2	10	25	0.252162	0.0591476	0.011745	0.0928732	0.0593972	2.08341	0.268556	0.0329485	0.173381	0.483668
ENSMUSG00000032021	4.14527	4.32783	0.677324	0	0	51.4774	20.0771	0.927772	3.97986	12.6244	1.83008	17.8173	-3.33961	0.00363671	0.248995	Crtam	9	40969691	41004628	-	5131	protein_coding	cytotoxic and regulatory T cell molecule [Source:MGI Symbol;Acc:MGI:1859822]	-	3	4	1	0	0	53	23	1	4	12	0.0328927	0.0342905	0.00510682	0	0	0.393539	0.157984	0.00716315	0.030155	0.100945
ENSMUSG00000083822	0	0	0	0	0	2.91381	6.98332	2.78332	3.97986	5.26016	0	4.38409	-4.52668	0.00363935	1	Hmgb1-ps5	3	95530418	95530974	+	557	processed_pseudogene	high mobility group box 1, pseudogene 5 [Source:MGI Symbol;Acc:MGI:3776505]	-	0	0	0	0	0	3	8	3	4	5	0	0	0	0	0	0.205201	0.506198	0.197957	0.277783	0.387455
ENSMUSG00000087516	15.1993	10.8196	883.908	89.0547	0	22.3392	0.872915	11.1333	5.96979	7.36422	199.796	9.53589	4.3905	0.00364833	0.248995	Tbx3os1	5	119570130	119671365	-	3167	antisense	T-box 3, opposite strand 1 [Source:MGI Symbol;Acc:MGI:3780472]	-	11	10	1305	85	0	23	1	12	6	7	0.1954	0.138889	10.7973	1.11222	0	0.27669	0.0111285	0.139264	0.0732832	0.0954018
ENSMUSG00000047222	0	0	0	0	0	2.91381	4.36458	11.1333	1.98993	3.1561	0	4.71154	-4.63226	0.00365225	1	Rnase2a	14	51255262	51256112	-	690	protein_coding	ribonuclease, RNase A family, 2A (liver, eosinophil-derived neurotoxin) [Source:MGI Symbol;Acc:MGI:1890465]	-	0	0	0	0	0	3	5	12	2	3	0	0	0	0	0	0.165648	0.255392	0.639202	0.11212	0.187663
ENSMUSG00000067599	0	5.40979	6.09591	6.28622	0	63.1326	15.7125	18.5554	2.98489	17.8845	3.55838	23.654	-2.68899	0.0036802	0.250305	Klra7	6	130218605	130233322	-	1265	protein_coding	killer cell lectin-like receptor, subfamily A, member 7 [Source:MGI Symbol;Acc:MGI:101901]	-	0	5	9	6	0	65	18	20	3	17	0	0.173858	0.186425	0.196553	0	1.95766	0.501497	0.581092	0.0917343	0.580049
ENSMUSG00000068227	73.233	61.6716	77.8922	63.9099	83.846	403.078	96.0207	78.8607	85.567	190.418	72.1106	170.789	-1.2431	0.00374995	0.253308	Il2rb	15	78479256	78495271	-	4287	protein_coding	interleukin 2 receptor, beta chain [Source:MGI Symbol;Acc:MGI:96550]	-	53	57	115	61	75	415	110	85	86	181	0.695509	0.58484	0.702905	0.589653	0.772774	3.68815	0.904326	0.728738	0.775972	1.82235
ENSMUSG00000021903	1519.93	1476.87	1114.2	1378.78	1411.97	1126.67	941.003	891.589	1231.77	818.481	1380.35	1001.9	0.46155	0.00376118	0.253308	Galnt15	14	32028989	32062197	+	6326	protein_coding	polypeptide N-acetylgalactosaminyltransferase 15 [Source:MGI Symbol;Acc:MGI:1926004]	-	1100	1365	1645	1316	1263	1160	1078	961	1238	778	9.78236	9.49115	6.81379	8.62078	8.81899	6.98623	6.00586	5.58342	7.56994	5.30832
ENSMUSG00000014602	34.5439	81.1469	1274.72	170.776	45.8358	43.7072	49.7562	52.883	66.6626	34.717	321.405	49.5452	2.69875	0.00376289	0.253308	Kif1a	1	93015464	93101951	-	9330	protein_coding	kinesin family member 1A [Source:MGI Symbol;Acc:MGI:108391]	-	25	75	1882	163	41	45	57	57	67	33	0.150743	0.353586	5.28555	0.723979	0.19411	0.183758	0.215317	0.224543	0.277776	0.152665
ENSMUSG00000105867	45.5979	46.5242	42.6714	26.1926	14.5333	7.77017	13.9666	15.7721	14.9245	17.8845	35.1039	14.0636	1.32168	0.00377696	0.25339	Gm42517	5	108366073	108367922	-	1850	protein_coding	predicted gene 42517 [Source:MGI Symbol;Acc:MGI:5662654]	-	33	43	63	25	13	8	16	17	15	17	1.00351	1.02238	0.892321	0.56	0.310396	0.164753	0.304814	0.33774	0.313632	0.396628
ENSMUSG00000041020	6.90878	3.24588	109.726	3.14311	26.8307	9.71271	0	3.71109	2.98489	2.10406	29.971	3.70255	3.03051	0.00379083	0.253459	Map7d2	X	159414572	159498757	+	4121	protein_coding	MAP7 domain containing 2 [Source:MGI Symbol;Acc:MGI:1917474]	-	5	3	162	3	24	10	0	4	3	2	0.068257	0.032021	1.03007	0.0301674	0.257249	0.092451	0	0.0356749	0.0281592	0.0209476
ENSMUSG00000025163	13.8176	8.65567	6.77324	6.28622	15.6513	111.696	18.3312	16.6999	3.97986	70.4861	10.2368	44.2387	-2.1218	0.00380493	0.253542	Cd7	11	121036747	121039418	-	1133	protein_coding	CD7 antigen [Source:MGI Symbol;Acc:MGI:88344]	-	10	8	10	6	14	115	21	18	4	67	0.496535	0.310582	0.231272	0.219453	0.545812	3.86707	0.653244	0.583913	0.136562	2.55242
ENSMUSG00000037095	3016.37	2240.74	2214.85	2716.69	7320.32	5596.46	8344.2	6325.55	4618.63	8267.92	3501.79	6630.55	-0.921144	0.00382122	0.25377	Lrg1	17	56119678	56122001	-	1408	protein_coding	leucine-rich alpha-2-glycoprotein 1 [Source:MGI Symbol;Acc:MGI:1924155]	-	2183	2071	3270	2593	6548	5762	9559	6818	4642	7859	87.223	64.6983	60.8552	76.3167	205.424	155.914	239.274	177.975	127.527	240.919
ENSMUSG00000032204	20.7263	5.40979	16.2558	31.4311	12.2974	34.9658	41.027	36.1831	43.7784	52.6016	17.2241	41.7112	-1.27789	0.0038664	0.255139	Aqp9	9	71110659	71168682	-	4143	protein_coding	aquaporin 9 [Source:MGI Symbol;Acc:MGI:1891066]	-	15	5	24	30	11	36	47	39	44	50	0.203684	0.0530849	0.151792	0.300072	0.11728	0.331056	0.399824	0.345984	0.410808	0.520909
ENSMUSG00000020427	436.635	443.603	1003.79	1089.61	300.728	382.681	283.697	216.171	419.875	347.17	654.874	329.919	0.99047	0.00386769	0.255139	Igfbp3	11	7206086	7213923	-	3130	protein_coding	insulin-like growth factor binding protein 3 [Source:MGI Symbol;Acc:MGI:96438]	-	316	410	1482	1040	269	394	325	233	422	330	5.67967	5.76176	12.4067	13.7692	3.79623	4.79586	3.65953	2.73601	5.21518	4.55068
ENSMUSG00000042208	516.777	517.176	440.26	489.277	479.599	572.079	610.168	632.741	600.959	664.884	488.618	616.166	-0.336505	0.00390136	0.256502	0610010F05Rik	11	23564961	23633639	-	5226	protein_coding	RIKEN cDNA 0610010F05 gene [Source:MGI Symbol;Acc:MGI:1918925]	-	374	478	650	467	429	589	699	682	604	632	4.02608	4.02322	3.25909	3.70312	3.62604	4.29398	4.71405	4.79646	4.47063	5.2198
ENSMUSG00000074796	49.7432	73.5732	105.663	47.1466	73.7845	23.3105	14.8396	60.3052	31.8389	18.9366	69.982	29.8461	1.23399	0.00394098	0.258245	Slc4a11	2	130684113	130697519	-	4998	protein_coding	solute carrier family 4, sodium bicarbonate transporter-like, member 11 [Source:MGI Symbol;Acc:MGI:2138987]	-	36	68	156	45	66	24	17	65	32	18	0.405216	0.598451	0.817863	0.373109	0.5833	0.182949	0.119878	0.477994	0.247659	0.155447
ENSMUSG00000000489	1058.42	930.484	1032.92	1093.8	826.163	805.184	664.288	834.995	780.052	658.572	988.358	748.618	0.400851	0.00399591	0.260978	Pdgfb	15	79995874	80014977	-	4161	protein_coding	platelet derived growth factor, B polypeptide [Source:MGI Symbol;Acc:MGI:97528]	-	766	860	1525	1044	739	829	761	900	784	626	10.3565	9.0911	9.60339	10.3973	7.84497	7.59051	6.44574	7.9497	7.28818	6.49356
ENSMUSG00000054008	714.368	703.273	2380.12	525.947	337.62	359.37	456.535	339.565	486.538	430.281	932.265	414.458	1.17063	0.00402751	0.262174	Ndst1	18	60685978	60713389	-	6070	protein_coding	N-deacetylase/N-sulfotransferase (heparan glucosaminyl) 1 [Source:MGI Symbol;Acc:MGI:104719]	-	517	650	3514	502	302	370	523	366	489	409	4.79162	4.71021	15.1693	3.42716	2.19767	2.32235	3.03668	2.21614	3.11617	2.90831
ENSMUSG00000058624	1627.71	1809.03	1041.05	1165.05	2039.13	2442.75	2638.82	2174.7	1653.63	3312.85	1536.39	2444.55	-0.670472	0.00405881	0.263342	Gda	19	21391307	21473445	-	6135	protein_coding	guanine deaminase [Source:MGI Symbol;Acc:MGI:95678]	-	1178	1672	1537	1112	1824	2515	3023	2344	1662	3149	10.8022	11.9877	6.56465	7.51121	13.1327	15.6184	17.3664	14.0426	10.4789	22.1546
ENSMUSG00000075122	55.2702	40.0325	44.026	41.9081	36.8922	75.7591	56.7395	51.9553	123.376	106.255	43.6258	82.8169	-0.92574	0.00409067	0.264539	Cd80	16	38455561	38496335	+	3703	protein_coding	CD80 antigen [Source:MGI Symbol;Acc:MGI:101775]	-	40	37	65	40	33	78	65	56	124	101	0.607696	0.439505	0.459951	0.447637	0.393645	0.802519	0.618651	0.555828	1.2953	1.17726
ENSMUSG00000028121	1970.38	1919.39	1442.02	1862.82	2054.79	2186.33	3406.12	2932.69	1937.2	2835.23	1849.88	2659.51	-0.524258	0.00410715	0.264737	Bcar3	3	122294136	122530191	+	5604	protein_coding	breast cancer anti-estrogen resistance 3 [Source:MGI Symbol;Acc:MGI:1352501]	-	1426	1774	2129	1778	1838	2251	3902	3161	1947	2695	14.3153	13.9242	9.95474	13.1478	14.4875	15.3035	24.54	20.7316	13.4391	20.7571
ENSMUSG00000048534	15.1993	9.73763	13.5465	13.6201	25.7128	73.8166	19.2041	33.3998	26.864	48.3935	15.5633	40.3356	-1.37683	0.00418352	0.268069	Jaml	9	45079183	45108534	+	3108	protein_coding	junction adhesion molecule like [Source:MGI Symbol;Acc:MGI:2685484]	-	11	9	20	13	23	76	22	36	27	46	0.199109	0.127373	0.168617	0.173333	0.326882	0.931637	0.249475	0.425723	0.336034	0.638827
ENSMUSG00000068011	2.76351	6.49175	8.80521	5.23851	4.47179	0.971271	0	0	0.994965	0	5.55415	0.393247	3.83446	0.00418603	0.268069	Mkrn2os	6	115583544	115592576	-	2542	protein_coding	makorin, ring finger protein 2, opposite strand [Source:MGI Symbol;Acc:MGI:1917541]	-	2	6	13	5	4	1	0	0	1	0	0.0442624	0.103822	0.134005	0.0815106	0.0695071	0.0149878	0	0	0.0152169	0
ENSMUSG00000061232	25704.8	25285.4	17485.1	20563.3	31813.4	60890.9	37510.9	30516.3	25061.2	41430.1	24170.4	39081.9	-0.693283	0.00424554	0.269833	H2-K1	17	33996017	34000333	-	2608	protein_coding	histocompatibility 2, K1, K region [Source:MGI Symbol;Acc:MGI:95904]	-	18603	23370	25815	19627	28457	62692	42972	32892	25188	39381	401.287	394.155	259.368	311.865	481.977	915.838	580.716	463.541	373.583	651.757
ENSMUSG00000064365	117.449	93.0484	210.648	159.251	120.738	54.3912	54.9937	41.7498	94.5216	113.619	140.227	71.8551	0.971306	0.00426051	0.269833	mt-Ts2	MT	11613	11671	+	59	Mt_tRNA	mitochondrially encoded tRNA serine 2 [Source:MGI Symbol;Acc:MGI:102474]	-	85	86	311	152	108	56	63	45	95	108	81.0489	64.1154	138.121	106.761	80.8568	36.1618	37.6335	28.0328	62.2834	79.0093
ENSMUSG00000037254	16.5811	17.3113	151.043	40.8604	20.123	18.4542	8.72915	0	5.96979	16.8325	49.1838	9.99712	2.3104	0.00426577	0.269833	Itih2	2	10094593	10131396	-	3315	protein_coding	inter-alpha trypsin inhibitor, heavy chain 2 [Source:MGI Symbol;Acc:MGI:96619]	-	12	16	223	39	18	19	10	0	6	16	0.203647	0.212301	1.76268	0.48753	0.239847	0.218366	0.106317	0	0.0700114	0.208326
ENSMUSG00000021620	0	3.24588	14.9011	7.33392	5.58973	0	0.872915	0	0	0	6.21413	0.174583	4.5758	0.00428317	0.269833	Acot12	13	91741512	91786148	+	3293	protein_coding	acyl-CoA thioesterase 12 [Source:MGI Symbol;Acc:MGI:1921406]	-	0	3	22	7	5	0	1	0	0	0	0	0.0400724	0.175059	0.0880899	0.0670692	0	0.0107027	0	0	0
ENSMUSG00000024730	30.3986	54.0979	35.2208	12.5724	20.123	118.495	24.4416	70.5107	55.718	142.024	30.4826	82.2379	-1.42852	0.00429633	0.269833	Ms4a8a	19	11067471	11081102	-	1795	protein_coding	membrane-spanning 4-domains, subfamily A, member 8A [Source:MGI Symbol;Acc:MGI:1927657]	-	22	50	52	12	18	122	28	76	56	135	0.689506	1.22524	0.759086	0.277036	0.442948	2.58946	0.549768	1.55616	1.20677	3.2462
ENSMUSG00000017314	109.159	137.409	270.252	203.254	226.943	111.696	97.7665	152.155	80.5921	89.4227	189.403	106.326	0.836633	0.00430906	0.269833	Mpp2	11	102057015	102088515	-	4807	protein_coding	membrane protein, palmitoylated 2 (MAGUK p55 subfamily member 2) [Source:MGI Symbol;Acc:MGI:1858257]	-	79	127	399	194	203	115	112	164	81	85	0.924556	1.1621	2.17496	1.67243	1.86538	0.911461	0.821164	1.25394	0.651796	0.763223
ENSMUSG00000040536	11.054	0	138.174	15.7155	0	1.94254	2.61875	0	4.97482	3.1561	32.9887	2.53844	3.7113	0.00430933	0.269833	Necab1	4	14952245	15149794	-	5237	protein_coding	N-terminal EF-hand calcium binding protein 1 [Source:MGI Symbol;Acc:MGI:1916602]	-	8	0	204	15	0	2	3	0	5	3	0.0859384	0	1.0207	0.118694	0	0.01455	0.0201895	0	0.0369308	0.0247255
ENSMUSG00000029217	160.284	131.999	163.235	174.966	171.046	192.312	245.289	210.604	213.917	277.736	160.306	227.972	-0.507228	0.00434511	0.271212	Tec	5	72755716	72868483	-	3744	protein_coding	tec protein tyrosine kinase [Source:MGI Symbol;Acc:MGI:98662]	-	116	122	241	167	153	198	281	227	215	264	1.74302	1.43331	1.68668	1.84842	1.8051	2.01485	2.64519	2.22841	2.22128	3.04351
ENSMUSG00000101111	963.084	832.026	738.96	1640.7	667.414	482.722	417.253	578.93	791.992	598.606	968.437	573.901	0.754877	0.00437238	0.271281	Gm28437	1	24613189	24613971	-	783	unprocessed_pseudogene	predicted gene 28437 [Source:MGI Symbol;Acc:MGI:5579143]	-	697	769	1091	1566	597	497	478	624	796	569	50.0785	43.1996	36.5103	82.88	33.6788	24.1829	21.5155	29.2906	39.3235	31.3658
ENSMUSG00000037353	1298.85	997.566	1341.1	1307.53	1303.53	977.099	807.447	1135.59	780.052	912.111	1249.72	922.461	0.438164	0.00437373	0.271281	Letmd1	15	100469023	100479164	+	4847	protein_coding	LETM1 domain containing 1 [Source:MGI Symbol;Acc:MGI:1915864]	-	940	922	1980	1248	1166	1006	925	1224	784	867	10.9103	8.36707	10.704	10.6699	10.626	7.9075	6.72597	9.28141	6.25668	7.72063
ENSMUSG00000110615	22.1081	21.6392	20.997	28.288	20.123	8.74144	13.9666	9.27772	6.96475	7.36422	22.6311	9.26296	1.27965	0.00440226	0.272195	Gm45890	8	123948790	123958935	+	1863	antisense	predicted gene 45890 [Source:MGI Symbol;Acc:MGI:5805005]	-	16	20	31	27	18	9	16	10	7	7	0.483156	0.472207	0.436015	0.60058	0.42678	0.184053	0.302687	0.197284	0.14534	0.162178
ENSMUSG00000033933	500.195	440.357	525.603	583.57	799.332	711.942	1104.24	1122.6	553.2	1100.43	569.812	918.482	-0.688934	0.00442772	0.272914	Vhl	6	113623959	113631633	+	2997	protein_coding	von Hippel-Lindau tumor suppressor [Source:MGI Symbol;Acc:MGI:103223]	-	362	407	776	557	715	733	1265	1210	556	1046	6.79519	5.97342	6.78465	7.70173	10.5381	9.31819	14.8761	14.839	7.17611	15.0644
ENSMUSG00000083097	138.176	142.819	122.596	145.631	186.697	250.588	191.168	267.198	201.978	179.897	147.183	218.166	-0.570691	0.00445496	0.273737	Gm14494	2	153826171	153826605	+	435	processed_pseudogene	predicted gene 14494 [Source:MGI Symbol;Acc:MGI:3704210]	-	100	132	181	139	167	258	219	288	203	171	12.9327	13.3475	10.9029	13.2418	16.9579	22.5967	17.7436	24.3337	18.0513	16.9673
ENSMUSG00000048763	24.8716	17.3113	119.886	81.7208	29.0666	26.2243	3.49166	21.3388	16.9144	12.6244	54.5713	16.1187	1.76925	0.00447351	0.274023	Hoxb3	11	96323326	96347930	+	4251	protein_coding	homeobox B3 [Source:MGI Symbol;Acc:MGI:96184]	Homeobox	18	16	177	78	26	27	4	23	17	12	0.238211	0.165556	1.09102	0.760367	0.270164	0.241984	0.0331631	0.198858	0.154689	0.121842
ENSMUSG00000018537	111.922	125.507	315.633	227.351	162.102	151.518	58.4853	115.972	70.6425	70.4861	188.503	93.4208	1.0169	0.00450449	0.275067	Pcgf2	11	97688823	97700497	-	3526	protein_coding	polycomb group ring finger 2 [Source:MGI Symbol;Acc:MGI:99161]	-	81	116	466	217	145	156	67	125	71	67	1.29236	1.44708	3.46303	2.55034	1.81648	1.68561	0.669697	1.30297	0.778892	0.820161
ENSMUSG00000043421	345.439	202.326	300.732	378.221	352.153	329.261	958.461	758.918	326.348	534.432	315.774	581.484	-0.881603	0.00452441	0.275431	Hilpda	6	29272488	29275446	+	1103	protein_coding	hypoxia inducible lipid droplet associated [Source:MGI Symbol;Acc:MGI:1916823]	-	250	187	444	361	315	339	1098	818	328	508	12.751	7.4573	10.5477	13.5629	12.6148	11.7095	35.0843	27.2573	11.5027	19.879
ENSMUSG00000036594	9452.59	7543.41	7813.61	7281.53	10434.9	27171.3	13306.7	8679.31	8111.95	19102.8	8505.21	15274.4	-0.844717	0.00456012	0.275531	H2-Aa	17	34282744	34287827	-	1874	protein_coding	histocompatibility 2, class II antigen A, alpha [Source:MGI Symbol;Acc:MGI:95895]	-	6841	6972	11536	6950	9334	27975	15244	9355	8153	18158	205.367	163.645	161.301	153.686	220.01	568.741	286.692	183.476	168.286	418.22
ENSMUSG00000074736	1.38176	0	23.7063	10.477	11.1795	1.94254	0	0	0	0	9.34892	0.388508	4.58162	0.00460944	0.275531	Syndig1	2	149829211	150004392	+	2463	protein_coding	synapse differentiation inducing 1 [Source:MGI Symbol;Acc:MGI:3702158]	-	1	0	35	10	10	2	0	0	0	0	0.022841	0	0.372354	0.16825	0.179341	0.0309371	0	0	0	0
ENSMUSG00000005364	2.76351	0	0	0	1.11795	46.621	12.2208	0	0.994965	9.46829	0.776292	13.861	-4.30458	0.00461245	0.275531	Il5ra	6	106710357	106749037	-	3575	protein_coding	interleukin 5 receptor, alpha [Source:MGI Symbol;Acc:MGI:96558]	-	2	0	0	0	1	48	14	0	1	9	0.0314727	0	0	0	0.0123557	0.51154	0.138019	0	0.0108199	0.108661
ENSMUSG00000001020	2.76351	7.57371	4.74127	6.28622	12.2974	36.9083	31.4249	12.061	21.8892	9.46829	6.73242	22.3504	-1.73368	0.00462364	0.275531	S100a4	3	90603771	90606045	+	584	protein_coding	S100 calcium binding protein A4 [Source:MGI Symbol;Acc:MGI:1330282]	-	2	7	7	6	11	38	36	13	22	9	0.192663	0.527231	0.314078	0.425754	0.832002	2.47905	2.17258	0.818156	1.45717	0.665175
ENSMUSG00000040283	2089.21	2966.73	1761.04	2066.07	2490.79	1476.33	1197.64	1957.6	1431.75	564.941	2274.77	1325.65	0.778779	0.00463479	0.275531	Btnl9	11	49165585	49187159	-	6054	protein_coding	butyrophilin-like 9 [Source:MGI Symbol;Acc:MGI:2442439]	-	1512	2742	2600	1972	2228	1520	1372	2110	1439	537	14.0504	19.9224	11.2534	13.4985	16.2561	9.56567	7.98726	12.8099	9.19432	3.82859
ENSMUSG00000052142	106.395	89.8026	123.95	81.7208	124.092	667.263	162.362	118.755	117.406	188.314	105.192	250.82	-1.25286	0.00463907	0.275531	Rasal3	17	32390659	32403583	-	4897	protein_coding	RAS protein activator like 3 [Source:MGI Symbol;Acc:MGI:2444128]	-	77	83	183	78	111	687	186	128	118	179	0.884587	0.745527	0.979204	0.660061	1.00124	5.34492	1.33866	0.960695	0.932079	1.57772
ENSMUSG00000044927	150.611	227.211	96.8573	132.011	218	225.335	390.193	472.236	201.978	233.551	164.938	304.659	-0.888288	0.0046455	0.275531	H1fx	6	87980421	87981637	-	1217	protein_coding	H1 histone family, member X [Source:MGI Symbol;Acc:MGI:2685307]	-	109	210	143	126	195	232	447	509	203	222	5.03867	7.59004	3.07892	4.29042	7.07764	7.26293	12.945	15.3721	6.45218	7.87352
ENSMUSG00000040260	218.317	204.49	375.237	199.063	167.692	169.001	132.683	109.477	173.124	88.3707	232.96	134.531	0.795515	0.00465077	0.275531	Daam2	17	49456022	49564343	-	9769	protein_coding	dishevelled associated activator of morphogenesis 2 [Source:MGI Symbol;Acc:MGI:1923691]	-	158	189	554	190	150	174	152	118	174	84	0.909886	0.850996	1.48598	0.805978	0.678244	0.678599	0.548377	0.443954	0.68897	0.371138
ENSMUSG00000063286	543.03	558.291	692.225	580.427	488.543	1851.24	1064.96	476.875	529.321	1619.08	572.503	1108.29	-0.952492	0.0046568	0.275531	Gm8995	7	106504239	106511671	-	7433	transcribed_unprocessed_pseudogene	predicted gene 8995 [Source:MGI Symbol;Acc:MGI:3644223]	-	393	516	1022	554	437	1906	1220	514	532	1539	2.97446	3.05352	3.60279	3.08863	2.59694	9.76951	5.78471	2.54159	2.76853	8.93678
ENSMUSG00000079547	1222.85	1013.8	929.966	831.876	1290.11	2497.14	1775.51	1052.09	1143.21	2213.47	1057.72	1736.29	-0.715377	0.00467424	0.275531	H2-DMb1	17	34153072	34160230	+	1485	protein_coding	histocompatibility 2, class II, locus Mb1 [Source:MGI Symbol;Acc:MGI:95922]	-	885	937	1373	794	1154	2571	2034	1134	1149	2104	33.5272	27.7542	24.2268	22.1572	34.3261	65.9614	48.2737	28.0668	29.9292	61.1541
ENSMUSG00000020875	34.5439	19.4753	858.847	134.106	22.3589	59.2475	13.9666	29.6887	21.8892	8.41625	213.866	26.6417	3.0063	0.00468631	0.275531	Hoxb9	11	96271457	96276595	+	2574	protein_coding	homeobox B9 [Source:MGI Symbol;Acc:MGI:96190]	Homeobox	25	18	1268	128	20	61	16	32	22	8	0.546401	0.307595	12.9081	2.06073	0.343215	0.902891	0.219077	0.456927	0.330609	0.134149
ENSMUSG00000097604	1.38176	0	43.3487	8.38162	2.23589	1.94254	0	0	0	0	11.0696	0.388508	4.82798	0.00469369	0.275531	Gm17322	9	57998041	58007451	+	2169	lincRNA	predicted gene, 17322 [Source:MGI Symbol;Acc:MGI:4936956]	-	1	0	64	8	2	2	0	0	0	0	0.025937	0	0.773166	0.152845	0.0407301	0.0351305	0	0	0	0
ENSMUSG00000072109	56.652	47.6062	30.4796	38.765	86.0819	371.997	88.1644	51.9553	69.6475	114.671	51.9169	139.287	-1.42762	0.00474253	0.277572	A530040E14Rik	1	85105946	85114035	+	2323	antisense	RIKEN cDNA A530040E14 gene [Source:MGI Symbol;Acc:MGI:3612703]	-	41	44	45	37	77	383	101	56	70	109	0.992921	0.833142	0.507593	0.660043	1.46415	6.28151	1.53235	0.886022	1.1656	2.02527
ENSMUSG00000040111	1296.09	1652.15	4158.09	762.727	1490.22	861.518	935.765	1137.45	932.282	892.123	1871.86	951.827	0.976286	0.00479754	0.279961	Gramd1b	9	40293233	40531383	-	10075	protein_coding	GRAM domain containing 1B [Source:MGI Symbol;Acc:MGI:1925037]	-	938	1527	6139	728	1333	887	1072	1226	937	848	5.23767	6.66668	15.9663	2.99438	5.84426	3.35423	3.75004	4.47251	3.59746	3.63293
ENSMUSG00000041134	537.503	479.308	287.185	538.519	268.307	270.985	185.931	261.632	319.384	100.995	422.164	227.785	0.88879	0.00482311	0.280623	Cyyr1	16	85421533	85553397	-	8894	protein_coding	cysteine and tyrosine-rich protein 1 [Source:MGI Symbol;Acc:MGI:2152187]	-	389	443	424	514	240	279	213	282	321	96	2.46055	2.1909	1.24917	2.39489	1.19195	1.19515	0.844051	1.16535	1.39608	0.465887
ENSMUSG00000099349	1425.97	1233.43	408.426	632.812	1589.72	1342.3	2115.07	3412.35	1284.5	2557.49	1058.07	2142.34	-1.01843	0.00485543	0.281672	1700047G03Rik	15	11964276	11970086	+	1493	lincRNA	RIKEN cDNA 1700047G03 gene [Source:MGI Symbol;Acc:MGI:1920589]	-	1032	1140	603	604	1422	1382	2423	3678	1291	2431	38.8866	33.5862	10.583	16.7647	42.0712	35.2665	57.1978	90.5436	33.4478	70.28
ENSMUSG00000089727	1.38176	4.32783	8.12789	2.09541	12.2974	12.6265	14.8396	31.5443	18.9043	23.1447	5.64606	20.2119	-1.80984	0.00501367	0.289999	Klra8	6	130115226	130129898	-	1178	protein_coding	killer cell lectin-like receptor, subfamily A, member 8 [Source:MGI Symbol;Acc:MGI:102968]	-	1	4	12	2	11	13	17	34	19	22	0.0477568	0.149359	0.266924	0.0703566	0.41247	0.420448	0.508616	1.06081	0.623892	0.806091
ENSMUSG00000064057	9.67229	5.40979	4.74127	1.0477	12.2974	0	1.74583	0	0	0	6.63369	0.349166	4.06589	0.00502908	0.29004	Scgb3a1	11	49663610	49665118	+	598	protein_coding	secretoglobin, family 3A, member 1 [Source:MGI Symbol;Acc:MGI:1915912]	-	7	5	7	1	11	0	2	0	0	0	0.658532	0.367777	0.306725	0.0692977	0.812524	0	0.117873	0	0	0
ENSMUSG00000021485	12.4358	16.2294	17.6104	28.288	17.8871	64.1039	58.4853	41.7498	15.9194	39.9772	18.4901	44.0471	-1.24841	0.00506926	0.290974	Mxd3	13	55325168	55329823	-	2369	protein_coding	Max dimerization protein 3 [Source:MGI Symbol;Acc:MGI:104987]	bHLH	9	15	26	27	16	66	67	45	16	38	0.213726	0.278511	0.287581	0.472301	0.298332	1.06143	0.996772	0.698157	0.26125	0.692349
ENSMUSG00000031872	9.67229	10.8196	71.7963	11.5247	17.8871	10.684	0	5.56663	4.97482	2.10406	24.34	4.6659	2.40051	0.00508918	0.290974	Bean1	8	104170442	104219122	+	3494	protein_coding	brain expressed, associated with Nedd4, 1 [Source:MGI Symbol;Acc:MGI:1929597]	-	7	10	106	11	16	11	0	6	5	2	0.112708	0.12589	0.794942	0.130464	0.202275	0.119946	0	0.0631152	0.0553539	0.0247066
ENSMUSG00000062098	410.381	363.538	457.871	452.608	390.163	318.577	251.4	340.492	343.263	289.309	414.912	308.608	0.428698	0.00508953	0.290974	Btbd3	2	138256565	138589292	+	5776	protein_coding	BTB (POZ) domain containing 3 [Source:MGI Symbol;Acc:MGI:2385155]	-	297	336	676	432	349	328	288	367	345	275	2.89274	2.55875	3.0667	3.09939	2.66896	2.16352	1.75732	2.33531	2.31043	2.055
ENSMUSG00000042793	44.2162	3.24588	35.8982	167.632	49.1897	7.77017	5.23749	0.927772	32.8338	0	60.0365	9.35385	2.6838	0.00511059	0.291263	Lgr6	1	134983301	135105276	-	6851	protein_coding	leucine-rich repeat-containing G protein-coupled receptor 6 [Source:MGI Symbol;Acc:MGI:2441805]	-	32	3	53	160	44	8	6	1	33	0	0.26277	0.0192612	0.20271	0.967801	0.28369	0.0444888	0.0308662	0.00536478	0.186321	0
ENSMUSG00000029544	49.7432	51.934	283.799	56.5759	59.2512	10.684	47.1374	53.8108	32.8338	8.41625	100.261	30.5765	1.71616	0.0051401	0.291263	Cabp1	5	115168689	115194381	-	5832	protein_coding	calcium binding protein 1 [Source:MGI Symbol;Acc:MGI:1352750]	-	36	48	419	54	53	11	54	58	33	8	0.347268	0.362026	1.88256	0.383704	0.401424	0.0718604	0.326334	0.365524	0.218876	0.0592078
ENSMUSG00000044667	88.4323	81.1469	49.4446	33.5265	105.087	148.604	114.352	148.444	111.436	127.296	71.5275	130.026	-0.870131	0.00515192	0.291263	Plppr4	3	117319139	117360876	-	7144	protein_coding	phospholipid phosphatase related 4 [Source:MGI Symbol;Acc:MGI:106530]	-	64	75	73	32	94	153	131	160	112	121	0.503986	0.46178	0.267753	0.185622	0.581207	0.815951	0.646273	0.82316	0.606426	0.731056
ENSMUSG00000095134	24.8716	16.2294	26.4156	18.8586	17.8871	5.82763	9.60207	6.49441	12.9345	4.20813	20.8525	7.81335	1.41548	0.00515952	0.291263	Mid1-ps1	Y	90753057	90763485	+	1248	unprocessed_pseudogene	midline 1, pseudogene 1 [Source:MGI Symbol;Acc:MGI:5780070]	-	18	15	39	18	16	6	11	7	13	4	0.811406	0.528679	0.818846	0.597692	0.566304	0.183169	0.310645	0.206153	0.40293	0.138341
ENSMUSG00000056492	3672.71	3993.51	2854.92	3819.92	3549.48	2244.61	1650.68	3223.08	2764.01	1140.4	3578.11	2204.56	0.698564	0.00516843	0.291263	Adgrf5	17	43360451	43459557	+	9010	protein_coding	adhesion G protein-coupled receptor F5 [Source:MGI Symbol;Acc:MGI:2182928]	-	2658	3691	4215	3646	3175	2311	1891	3474	2778	1084	16.5963	18.0192	12.2582	16.7692	15.5655	9.77213	7.39695	14.1713	11.9264	5.19291
ENSMUSG00000066361	1945.51	1990.8	782.309	1904.72	3371.73	2894.39	5186.86	4856.89	2124.25	3837.81	1999.02	3780.04	-0.91944	0.00522281	0.293196	Serpina3c	12	104146382	104153870	-	2213	protein_coding	serine (or cysteine) peptidase inhibitor, clade A, member 3C [Source:MGI Symbol;Acc:MGI:102848]	-	1408	1840	1155	1818	3016	2980	5942	5235	2135	3648	35.7933	36.5723	13.6758	34.0434	60.1997	51.3037	94.6318	86.9443	37.3179	71.1508
ENSMUSG00000039221	587.246	485.799	552.696	639.099	671.886	873.173	809.192	815.512	722.344	664.884	587.345	777.021	-0.404547	0.00523245	0.293196	Rpl22l1	3	28805436	28807424	+	1989	protein_coding	ribosomal protein L22 like 1 [Source:MGI Symbol;Acc:MGI:1915278]	-	425	449	816	610	601	899	927	879	726	632	12.0208	9.92949	10.75	12.7091	13.347	17.2202	16.426	16.2428	14.119	13.7148
ENSMUSG00000029001	109.159	111.442	314.278	138.297	140.861	86.4431	80.3082	77.0051	116.411	74.6942	162.807	86.9723	0.911489	0.00525169	0.29344	Fbxo44	4	148152800	148160482	-	3024	protein_coding	F-box protein 44 [Source:MGI Symbol;Acc:MGI:1354744]	-	79	103	464	132	126	89	92	83	117	71	1.46969	1.4982	4.02058	1.80889	1.84049	1.1213	1.07224	1.00879	1.4966	1.01341
ENSMUSG00000033595	8.29053	12.9835	182.2	118.39	4.47179	19.4254	12.2208	7.42218	10.9446	17.8845	65.2673	13.5795	2.27223	0.00529048	0.294158	Lgi3	14	70530685	70538324	+	3899	protein_coding	leucine-rich repeat LGI family, member 3 [Source:MGI Symbol;Acc:MGI:2182619]	-	6	12	269	113	4	20	14	8	11	17	0.0865721	0.135377	1.8078	1.20101	0.045316	0.19543	0.12655	0.0754124	0.109129	0.188192
ENSMUSG00000044303	44.2162	22.7211	39.9621	19.9063	38.0102	130.15	54.1207	42.6775	80.5921	50.4975	32.9632	71.6077	-1.1199	0.00529436	0.294158	Cdkn2a	4	89274471	89294653	-	1172	protein_coding	cyclin dependent kinase inhibitor 2A [Source:MGI Symbol;Acc:MGI:104738]	-	32	21	59	19	34	134	62	46	81	48	1.53604	0.788147	1.3191	0.671809	1.28143	4.35604	1.86445	1.44257	2.67337	1.76775
ENSMUSG00000034795	143.703	156.884	142.238	168.68	153.159	184.542	192.041	219.882	206.953	255.644	152.933	211.812	-0.46944	0.00534562	0.296172	Ccdc122	14	77036772	77112257	+	1985	protein_coding	coiled-coil domain containing 122 [Source:MGI Symbol;Acc:MGI:1918358]	-	104	145	210	161	137	190	220	237	208	243	2.94749	3.21309	2.77211	3.36113	3.04863	3.64676	3.90614	4.38827	4.05325	5.28387
ENSMUSG00000032446	12.4358	8.65567	0	5.23851	4.47179	95.1846	8.72915	10.2055	17.9094	25.2488	6.16035	31.4555	-2.38753	0.00547937	0.302328	Eomes	9	118478212	118486132	+	4155	protein_coding	eomesodermin [Source:MGI Symbol;Acc:MGI:1201683]	T-box	9	8	0	5	4	98	10	11	18	24	0.121857	0.0846905	0	0.0498676	0.0425239	0.898606	0.0848233	0.0973033	0.167572	0.249314
ENSMUSG00000039137	53.8885	56.2618	509.347	107.913	81.6101	67.989	58.4853	59.3774	42.7835	53.6536	161.804	56.4578	1.52416	0.00548739	0.302328	Whrn	4	63414910	63495991	-	7337	protein_coding	whirlin [Source:MGI Symbol;Acc:MGI:2682003]	-	39	52	752	103	73	70	67	64	43	51	0.299038	0.311746	2.68566	0.581753	0.43949	0.363491	0.321842	0.320603	0.2267	0.300025
ENSMUSG00000047502	5.52702	9.73763	62.3138	15.7155	5.58973	0	3.49166	4.63886	6.96475	2.10406	19.7767	3.43987	2.53958	0.00551832	0.30242	Mroh7	4	106680417	106730925	-	4800	protein_coding	maestro heat-like repeat family member 7 [Source:MGI Symbol;Acc:MGI:2685873]	-	4	9	92	15	5	0	4	5	7	2	0.0468812	0.082474	0.502226	0.1295	0.0460122	0	0.0293701	0.0382855	0.0564102	0.0179844
ENSMUSG00000064360	1193.84	1115.5	1376.32	1659.56	1139.19	737.195	562.157	725.518	1034.76	1188.8	1296.88	849.686	0.610733	0.00551972	0.30242	mt-Nd3	MT	9459	9806	+	348	protein_coding	mitochondrially encoded NADH dehydrogenase 3 [Source:MGI Symbol;Acc:MGI:102499]	-	864	1031	2032	1584	1019	759	644	782	1040	1130	139.674	130.315	153.002	188.624	129.342	83.0954	65.2218	82.5911	115.599	140.154
ENSMUSG00000062991	0	1.08196	27.093	15.7155	0	0	0	0	0	0	8.77809	0	5.64244	0.00554851	0.303155	Nrg1	8	31814551	32884029	-	10351	protein_coding	neuregulin 1 [Source:MGI Symbol;Acc:MGI:96083]	-	0	1	40	15	0	0	0	0	0	0	0	0.00424946	0.101258	0.0600522	0	0	0	0	0	0
ENSMUSG00000021313	251.479	271.572	344.08	169.728	258.246	128.208	239.179	53.8108	136.31	123.088	259.021	136.119	0.928423	0.00558529	0.304321	Ryr2	13	11553102	12106945	-	28790	protein_coding	ryanodine receptor 2, cardiac [Source:MGI Symbol;Acc:MGI:99685]	-	182	251	508	162	231	132	274	58	137	117	0.355639	0.383484	0.462354	0.233181	0.354417	0.174681	0.335425	0.0740444	0.184069	0.175409
ENSMUSG00000052749	6.90878	1.08196	0.677324	12.5724	2.23589	27.1956	11.3479	14.8444	11.9396	39.9772	4.69528	21.0609	-2.19534	0.00561555	0.304636	Trim30b	7	104355382	104369884	-	7527	protein_coding	tripartite motif-containing 30B [Source:MGI Symbol;Acc:MGI:4821256]	-	5	1	1	12	2	28	13	16	12	38	0.0373704	0.00584378	0.00348121	0.0660662	0.0117369	0.141726	0.0608706	0.0781275	0.0616681	0.217905
ENSMUSG00000015289	486.378	557.209	432.81	487.182	620.46	755.649	696.586	696.757	595.984	670.144	516.808	683.024	-0.403719	0.00562196	0.304636	Lage3	X	74351276	74353618	-	2021	protein_coding	L antigen family, member 3 [Source:MGI Symbol;Acc:MGI:1913442]	-	352	515	639	465	555	778	798	751	599	637	9.79843	11.2087	8.28489	9.53469	12.1303	14.6665	13.9163	13.6578	11.4647	13.6044
ENSMUSG00000034926	417.29	466.324	371.851	445.274	310.789	517.688	665.161	718.096	406.941	620.699	402.306	585.717	-0.542655	0.00565336	0.305498	Dhcr24	4	106561038	106589113	+	4028	protein_coding	24-dehydrocholesterol reductase [Source:MGI Symbol;Acc:MGI:1922004]	-	302	431	549	425	278	533	762	774	409	590	4.21791	4.70656	3.57137	4.37239	3.0486	5.04141	6.66732	7.06248	3.92767	6.32221
ENSMUSG00000064349	1101.26	821.207	866.297	872.736	684.183	518.659	365.751	269.054	574.095	843.729	869.136	514.258	0.757462	0.00572994	0.30879	mt-Tc	MT	5192	5257	-	66	Mt_tRNA	mitochondrially encoded tRNA cysteine [Source:MGI Symbol;Acc:MGI:102490]	-	797	759	1279	833	612	534	419	290	577	802	679.351	505.84	507.784	523.023	409.593	308.256	223.746	161.495	338.168	524.49
ENSMUSG00000046204	0	0	48.09	9.42932	4.47179	0	0	0	0	2.10406	12.3982	0.420813	4.9882	0.00578334	0.310343	Pnma2	14	66911170	66921023	+	5976	protein_coding	paraneoplastic antigen MA2 [Source:MGI Symbol;Acc:MGI:2444129]	-	0	0	71	9	4	0	0	0	0	2	0	0	0.311315	0.0624097	0.0295661	0	0	0	0	0.0144453
ENSMUSG00000078881	175.483	24.885	89.4067	1.0477	0	0	7.85624	0.927772	0	1.05203	58.1645	1.96721	4.87315	0.00579021	0.310343	Gm14434	2	176473278	176486783	-	2774	protein_coding	predicted gene 14434 [Source:MGI Symbol;Acc:MGI:3702417]	zf-C2H2	127	23	132	1	0	0	9	1	0	1	2.57559	0.364701	1.24687	0.0149387	0	0	0.114346	0.0132495	0	0.0155597
ENSMUSG00000048489	876.033	1065.73	615.687	1329.53	858.583	678.919	230.45	886.95	290.53	201.99	949.113	457.768	1.05162	0.00581871	0.310495	Depp1	6	116650609	116652794	+	1358	protein_coding	DEPP1 autophagy regulator [Source:MGI Symbol;Acc:MGI:1918730]	-	634	985	909	1269	768	699	264	956	292	192	26.2645	31.9045	17.5395	38.7241	24.9808	19.6106	6.85157	25.874	8.31733	6.1025
ENSMUSG00000027500	66.3243	62.7536	547.955	117.343	88.3178	56.3337	48.0103	62.1608	54.7231	93.6308	176.539	62.9717	1.49289	0.00582453	0.310495	Stmn2	3	8509360	8561606	+	5602	protein_coding	stathmin-like 2 [Source:MGI Symbol;Acc:MGI:98241]	-	48	58	809	112	79	58	55	67	55	89	0.482035	0.455408	3.78406	0.828504	0.622915	0.394457	0.346023	0.439579	0.37977	0.68573
ENSMUSG00000062713	15.1993	17.3113	6.77324	100.579	35.7743	3.88508	6.98332	9.27772	11.9396	13.6764	35.1275	9.15242	1.94233	0.00584058	0.310511	Sim2	16	94084931	94127032	+	4221	protein_coding	single-minded family bHLH transcription factor 2 [Source:MGI Symbol;Acc:MGI:98307]	-	11	16	10	96	32	4	8	10	12	13	0.146608	0.166732	0.0620779	0.942488	0.334872	0.0361043	0.0667976	0.0870744	0.109968	0.132934
ENSMUSG00000022584	63.5607	20.5572	20.997	92.1978	36.8922	400.164	96.8936	42.6775	34.8238	179.897	46.841	150.891	-1.69131	0.00585733	0.310564	Ly6c2	15	75108158	75111970	-	2740	protein_coding	lymphocyte antigen 6 complex, locus C2 [Source:MGI Symbol;Acc:MGI:3712069]	-	46	19	31	88	33	412	111	46	35	171	0.944468	0.305013	0.296458	1.33092	0.531996	5.72876	1.42777	0.61704	0.494104	2.69372
ENSMUSG00000010825	0	4.32783	41.9941	2.09541	0	0.971271	0	0	0	0	9.68346	0.194254	5.21179	0.00591484	0.312773	Grid2ip	5	143357338	143392152	+	6773	protein_coding	glutamate receptor, ionotropic, delta 2 (Grid2) interacting protein 1 [Source:MGI Symbol;Acc:MGI:2176213]	-	0	4	62	2	0	1	0	0	0	0	0	0.0259773	0.239863	0.0122368	0	0.00562514	0	0	0	0
ENSMUSG00000006360	2257.79	2194.21	2322.54	1972.82	2422.59	3100.3	3269.94	2494.78	2432.69	4449.04	2233.99	3149.35	-0.495333	0.00593332	0.312911	Crip1	12	113146316	113153879	+	2280	protein_coding	cysteine-rich protein 1 (intestinal) [Source:MGI Symbol;Acc:MGI:88501]	-	1634	2028	3429	1883	2167	3192	3746	2689	2445	4229	40.3178	39.1245	39.408	34.2244	41.9825	53.3387	57.9054	43.3473	41.4806	80.0588
ENSMUSG00000043263	85.6688	121.179	120.564	80.6731	100.615	685.717	116.971	75.1496	89.5468	390.304	101.74	271.538	-1.41489	0.00601248	0.31624	Ifi209	1	173630917	173647928	+	3547	protein_coding	interferon activated gene 209 [Source:MGI Symbol;Acc:MGI:2138243]	-	62	112	178	77	90	706	134	81	90	371	0.983356	1.3889	1.31496	0.8996	1.12079	7.58329	1.33146	0.839324	0.981482	4.5146
ENSMUSG00000020717	2749.69	3041.39	2259.55	3061.39	2565.69	2201.87	1349.53	2052.23	2124.25	836.365	2735.54	1712.85	0.675278	0.00602976	0.316306	Pecam1	11	106654217	106750628	-	6228	protein_coding	platelet/endothelial cell adhesion molecule 1 [Source:MGI Symbol;Acc:MGI:97537]	-	1990	2811	3336	2922	2295	2267	1546	2212	2135	795	17.9756	19.8531	14.0356	19.4425	16.2772	13.8681	8.74877	13.054	13.2602	5.50966
ENSMUSG00000069917	693.641	740.06	211.325	1007.89	1508.11	547.797	272.35	303.382	423.855	462.894	832.205	402.055	1.04923	0.00605798	0.316943	Hba-a2	11	32296489	32297298	+	667	protein_coding	hemoglobin alpha, adult chain 2 [Source:MGI Symbol;Acc:MGI:96016]	-	502	684	312	962	1349	564	312	327	426	440	42.3407	45.1072	12.2569	59.7681	89.3369	32.2157	16.486	18.0189	24.705	28.473
ENSMUSG00000018848	905.05	888.288	919.128	927.217	904.419	1076.17	1193.28	1003.85	1091.48	1136.19	908.82	1100.19	-0.27556	0.00611779	0.318247	Rars	11	35808381	35834506	-	3228	protein_coding	arginyl-tRNA synthetase [Source:MGI Symbol;Acc:MGI:1914297]	-	655	821	1357	885	809	1108	1367	1082	1097	1080	11.4153	11.1873	11.0154	11.3613	11.0703	13.0774	14.9252	12.3197	13.1454	14.441
ENSMUSG00000002058	1343.07	2029.75	948.931	1139.9	2010.07	1940.6	2658.9	3576.56	1676.52	2439.66	1494.34	2458.45	-0.71861	0.00613099	0.318247	Unc119	11	78343482	78349164	+	2448	protein_coding	unc-119 lipid binding chaperone [Source:MGI Symbol;Acc:MGI:1328357]	-	972	1876	1401	1088	1798	1998	3046	3855	1685	2319	22.3375	33.7083	14.9961	18.4178	32.4431	31.0956	43.8535	57.8787	26.625	40.888
ENSMUSG00000052981	8.29053	0	23.029	10.477	10.0615	0	0	0	2.98489	1.05203	10.3716	0.807385	3.72349	0.00613131	0.318247	Ube2ql1	13	69702832	69739889	-	2674	protein_coding	ubiquitin-conjugating enzyme E2Q family-like 1 [Source:MGI Symbol;Acc:MGI:1924230]	-	6	0	34	10	9	0	0	0	3	1	0.126232	0	0.333173	0.154974	0.148671	0	0	0	0.0433971	0.0161415
ENSMUSG00000050271	498.814	416.554	317.665	450.512	308.553	316.634	206.881	329.359	255.706	173.585	398.42	256.433	0.633723	0.00621619	0.321605	Prag1	8	36094828	36147787	+	9606	protein_coding	PEAK1 related kinase activating pseudokinase 1 [Source:MGI Symbol;Acc:MGI:1196223]	-	361	385	469	430	276	326	237	355	257	165	2.11419	1.76292	1.27933	1.85501	1.26914	1.29297	0.869544	1.35829	1.03488	0.741392
ENSMUSG00000029088	12.4358	21.6392	69.7643	14.6678	0	1.94254	1.74583	5.56663	3.97986	7.36422	23.7014	4.11982	2.54304	0.00623898	0.321605	Kcnip4	5	48389502	49524907	-	3627	protein_coding	Kv channel interacting protein 4 [Source:MGI Symbol;Acc:MGI:1933131]	-	9	20	103	14	0	2	2	6	4	7	0.139597	0.242548	0.744118	0.159956	0	0.0210086	0.0194343	0.0608008	0.0426593	0.0833023
ENSMUSG00000054814	428.344	456.586	392.17	401.27	431.527	524.486	586.599	529.758	467.633	571.253	421.98	535.946	-0.346382	0.00624491	0.321605	Usp46	5	73998453	74068431	-	7841	protein_coding	ubiquitin specific peptidase 46 [Source:MGI Symbol;Acc:MGI:1916977]	-	310	422	579	383	386	540	672	571	470	543	2.22418	2.36732	1.9349	2.02417	2.17451	2.62384	3.02053	2.67652	2.31861	2.98906
ENSMUSG00000087400	8.29053	2.16392	4.74127	7.33392	1.11795	0.971271	0	0	0	0	4.72952	0.194254	4.15786	0.00626166	1	Gm15270	10	24549441	24597108	-	2053	processed_transcript	predicted gene 15270 [Source:MGI Symbol;Acc:MGI:3705149]	-	6	2	7	7	1	1	0	0	0	0	0.164415	0.0428506	0.0893432	0.141296	0.0215157	0.0185577	0	0	0	0
ENSMUSG00000046093	2.76351	0	36.5755	0	6.70768	0	0.872915	0	0	0	9.20934	0.174583	5.13786	0.00629058	0.323113	Hpcal4	4	123183227	123194701	+	5339	protein_coding	hippocalcin-like 4 [Source:MGI Symbol;Acc:MGI:2157521]	-	2	0	54	0	6	0	1	0	0	0	0.0210742	0	0.265025	0	0.0496405	0	0.00660125	0	0	0
ENSMUSG00000037321	708.841	810.387	621.783	643.289	869.763	2802.12	832.761	976.944	720.354	1416.03	730.813	1349.64	-0.885127	0.00632677	0.323868	Tap1	17	34187553	34197225	+	5476	protein_coding	transporter 1, ATP-binding cassette, sub-family B (MDR/TAP) [Source:MGI Symbol;Acc:MGI:98483]	-	513	749	918	614	778	2885	954	1053	724	1346	5.27028	6.01636	4.3927	4.64649	6.27568	20.0723	6.14004	7.06758	5.11418	10.6093
ENSMUSG00000109394	9.67229	6.49175	149.011	31.4311	11.1795	8.74144	10.475	13.9166	2.98489	0	41.5572	7.22358	2.52693	0.00634336	0.323868	A230057D06Rik	7	61704519	61928690	-	11357	lincRNA	RIKEN cDNA A230057D06 gene [Source:MGI Symbol;Acc:MGI:2442922]	-	7	6	220	30	10	9	12	15	3	0	0.0346748	0.0232382	0.507588	0.109466	0.0388939	0.0301921	0.0372395	0.0485438	0.0102178	0
ENSMUSG00000097871	9.67229	1.08196	0	9.42932	8.94357	0	0	0	0	0	5.82543	0	5.0316	0.00637524	0.323868	B230104I21Rik	4	154336127	154349918	+	876	protein_coding	RIKEN cDNA B230104I21 gene [Source:MGI Symbol;Acc:MGI:3642713]	-	7	1	0	9	8	0	0	0	0	0	0.449546	0.0502125	0	0.425754	0.403395	0	0	0	0	0
ENSMUSG00000102037	33.1621	4.32783	10.8372	9.42932	13.4154	105.869	21.8229	15.7721	27.859	63.1219	14.2344	46.8889	-1.73825	0.00638707	0.323868	Bcl2a1a	9	88956900	88962419	+	819	protein_coding	B cell leukemia/lymphoma 2 related protein A1a [Source:MGI Symbol;Acc:MGI:102687]	-	24	4	16	9	12	109	25	17	28	60	1.64857	0.214828	0.511904	0.455385	0.647205	5.07057	1.07583	0.762906	1.32244	3.16209
ENSMUSG00000069441	8.29053	7.57371	3.38662	0	3.35384	9.71271	36.6624	12.061	10.9446	22.0927	4.52094	18.2947	-2.04984	0.00638738	0.323868	Dsg1a	18	20310811	20343350	+	5686	protein_coding	desmoglein 1 alpha [Source:MGI Symbol;Acc:MGI:94930]	-	6	7	5	0	3	10	42	13	11	21	0.0593642	0.054151	0.0230417	0	0.0233055	0.067005	0.260333	0.0840315	0.0748319	0.159411
ENSMUSG00000065947	196.209	135.245	432.133	294.404	137.507	132.093	88.1644	88.1384	166.159	146.232	239.1	124.157	0.949826	0.00646505	0.326833	mt-Nd4l	MT	9877	10173	+	297	protein_coding	mitochondrially encoded NADH dehydrogenase 4L [Source:MGI Symbol;Acc:MGI:102497]	-	142	125	638	281	123	136	101	95	167	139	26.8975	18.5127	56.2881	39.2076	18.2934	17.446	11.9854	11.7564	21.7501	20.2006
ENSMUSG00000049892	1276.74	1489.86	1225.28	1727.66	2196.77	2683.62	4106.19	1954.82	1855.61	2074.61	1583.26	2534.97	-0.679288	0.00648292	0.326833	Rasd1	11	59963181	59964944	-	1611	protein_coding	RAS, dexamethasone-induced 1 [Source:MGI Symbol;Acc:MGI:1270848]	-	924	1377	1809	1649	1965	2763	4704	2107	1865	1972	32.2668	37.5971	29.4236	42.4175	53.878	65.3431	102.91	48.0701	44.78	52.8345
ENSMUSG00000064350	78.7601	74.6551	109.049	81.7208	117.384	36.9083	33.1708	26.9054	88.5519	51.5496	92.3139	47.4172	0.96634	0.00649556	0.326833	mt-Ty	MT	5260	5326	-	67	Mt_tRNA	mitochondrially encoded tRNA tyrosine [Source:MGI Symbol;Acc:MGI:102470]	-	57	69	161	78	105	38	38	29	89	49	47.8608	45.2991	62.9656	48.2436	69.2244	21.6084	19.9892	15.9085	51.3826	31.5666
ENSMUSG00000113737	4.14527	2.16392	2.03197	6.28622	2.23589	9.71271	3.49166	15.7721	15.9194	24.1967	3.37265	13.8185	-2.05177	0.00653847	0.327472	BB123696	13	52729615	52757205	-	2306	lincRNA	expressed sequence BB123696 [Source:MGI Symbol;Acc:MGI:2145475]	-	3	2	3	6	2	10	4	17	16	23	0.0731884	0.0381493	0.034089	0.107823	0.0383103	0.165217	0.0611345	0.270954	0.268387	0.430502
ENSMUSG00000087201	4.14527	6.49175	6.09591	0	11.1795	0	0	0	0.994965	0	5.58248	0.198993	4.40359	0.00654147	0.327472	Gm15261	X	169037674	169106536	-	2763	antisense	predicted gene 15261 [Source:MGI Symbol;Acc:MGI:3705201]	-	3	6	9	0	10	0	0	0	1	0	0.061083	0.0955182	0.085352	0	0.159869	0	0	0	0.0139997	0
ENSMUSG00000029165	92.5776	89.8026	181.523	189.634	105.087	81.5868	95.1478	60.3052	78.6022	59.9658	131.725	75.1216	0.81458	0.0065709	0.328112	Agbl5	5	30888694	30906965	+	7053	protein_coding	ATP/GTP binding protein-like 5 [Source:MGI Symbol;Acc:MGI:2441745]	-	67	83	268	181	94	84	109	65	79	57	0.534418	0.51763	0.995665	1.06347	0.588706	0.453753	0.544676	0.338723	0.433266	0.348825
ENSMUSG00000016255	2.76351	4.32783	10.1599	11.5247	0	0	0	0	0	1.05203	5.75519	0.210406	4.45804	0.00661767	0.329268	Tubb1	2	174450695	174457882	+	1406	protein_coding	tubulin, beta 1 class VI [Source:MGI Symbol;Acc:MGI:107814]	-	2	4	15	11	0	0	0	0	0	1	0.0800248	0.125138	0.279549	0.324211	0	0	0	0	0	0.0306988
ENSMUSG00000059401	156.138	142.819	249.932	162.394	175.518	102.955	120.462	86.2828	123.376	142.024	177.36	115.02	0.630976	0.00662744	0.329268	Mamld1	X	71050256	71156056	+	4796	protein_coding	mastermind-like domain containing 1 [Source:MGI Symbol;Acc:MGI:3045303]	-	113	132	369	155	157	106	138	93	124	135	1.3255	1.21063	2.01604	1.33928	1.44599	0.842056	1.01411	0.712705	1.0001	1.21496
ENSMUSG00000086049	8.29053	4.32783	6.77324	0	5.58973	0	0	0	0	0	4.99627	0	4.81793	0.00667328	1	Gm12735	11	3193516	3194263	-	651	antisense	predicted gene 12735 [Source:MGI Symbol;Acc:MGI:3650816]	-	6	4	10	0	5	0	0	0	0	0	0.518502	0.270268	0.402505	0	0.339261	0	0	0	0	0
ENSMUSG00000037664	602.445	561.536	1970.33	738.63	527.671	445.813	413.762	454.608	651.702	282.997	880.124	449.776	0.969743	0.00670154	0.331388	Cdkn1c	7	143458339	143461050	-	2039	protein_coding	cyclin-dependent kinase inhibitor 1C (P57) [Source:MGI Symbol;Acc:MGI:104564]	-	436	519	2909	705	472	459	474	490	655	269	12.0295	11.1961	37.3834	14.3282	10.2251	8.57649	8.19308	8.83252	12.4258	5.69432
ENSMUSG00000049112	736.476	703.273	1190.06	863.307	1332.59	1403.49	4033.74	748.712	1353.15	1999.91	965.141	1907.8	-0.982902	0.00670371	0.331388	Oxtr	6	112473683	112489943	-	4790	protein_coding	oxytocin receptor [Source:MGI Symbol;Acc:MGI:109147]	-	533	650	1757	824	1192	1445	4621	807	1360	1901	6.25996	5.96889	9.61144	7.12872	10.9922	11.4933	34.0006	6.19218	10.9826	17.1298
ENSMUSG00000023132	5.52702	12.9835	23.029	14.6678	1.11795	98.0984	15.7125	16.6999	22.8842	67.33	11.4651	44.145	-1.9198	0.00674781	0.332697	Gzma	13	113093825	113100981	-	1006	protein_coding	granzyme A [Source:MGI Symbol;Acc:MGI:109266]	-	4	12	34	14	1	101	18	18	23	64	0.223688	0.524685	0.885591	0.5767	0.0439083	3.82505	0.630609	0.657628	0.884364	2.74592
ENSMUSG00000074213	1.38176	18.3933	3.38662	7.33392	14.5333	16.5116	31.4249	52.883	29.8489	17.8845	9.00578	29.7106	-1.7275	0.00676391	0.332697	Gm10642	9	70656251	70657860	+	1610	protein_coding	predicted gene 10642 [Source:MGI Symbol;Acc:MGI:3704338]	-	1	17	5	7	13	17	36	57	30	17	0.0349425	0.46445	0.081376	0.180174	0.356666	0.402288	0.788066	1.30123	0.720769	0.455753
ENSMUSG00000022790	16.5811	9.73763	102.953	2.09541	4.47179	0	1.74583	10.2055	3.97986	0	27.1678	3.18624	3.09453	0.00685519	0.336007	Igsf11	16	38892671	39027159	+	4493	protein_coding	immunoglobulin superfamily, member 11 [Source:MGI Symbol;Acc:MGI:2388477]	-	12	9	152	2	4	0	2	11	4	0	0.150254	0.0881093	0.886461	0.0184465	0.0393249	0	0.0156884	0.0899833	0.0344369	0
ENSMUSG00000035697	1047.37	1105.76	1281.5	949.219	1228.62	3241.13	1633.22	1301.66	1355.14	1457.06	1122.49	1797.65	-0.679168	0.00686787	0.336007	Arhgap45	10	80016653	80031472	+	4478	protein_coding	Rho GTPase activating protein 45 [Source:MGI Symbol;Acc:MGI:1917969]	-	758	1022	1892	906	1099	3337	1871	1403	1362	1385	9.52281	10.0388	11.0711	8.38425	10.8407	28.3914	14.7257	11.5154	11.7651	13.3497
ENSMUSG00000075592	74.6148	43.2783	65.0231	33.5265	24.5948	16.5116	24.4416	12.9888	34.8238	17.8845	48.2075	21.3301	1.17647	0.0068948	0.336007	Nynrin	14	55854010	55874736	+	7518	protein_coding	NYN domain and retroviral integrase containing [Source:MGI Symbol;Acc:MGI:2652872]	-	54	40	96	32	22	17	28	14	35	17	0.404084	0.234031	0.334596	0.176387	0.12926	0.0861511	0.131263	0.0684434	0.180081	0.0976007
ENSMUSG00000099974	67.706	55.1799	79.9242	90.1024	53.6614	286.525	94.2748	78.8607	71.6375	206.198	69.3148	147.499	-1.08684	0.00689935	0.336007	Bcl2a1d	9	88723285	88731914	-	863	protein_coding	B cell leukemia/lymphoma 2 related protein A1d [Source:MGI Symbol;Acc:MGI:1278325]	-	49	51	118	86	48	295	108	85	72	196	3.19422	2.59941	3.58281	4.1296	2.45683	13.0234	4.41061	3.62004	3.22718	9.80284
ENSMUSG00000038453	38.6892	81.1469	478.191	91.1501	103.969	42.7359	68.9603	77.9329	53.7281	45.2374	158.629	57.7189	1.46322	0.00693145	0.336189	Srcin1	11	97509340	97576186	-	9558	protein_coding	SRC kinase signaling inhibitor 1 [Source:MGI Symbol;Acc:MGI:1933179]	-	28	75	706	87	93	44	79	84	54	43	0.164805	0.345152	1.93549	0.3772	0.429794	0.175388	0.291304	0.323012	0.218538	0.194182
ENSMUSG00000029830	27.6351	18.3933	10.8372	18.8586	6.70768	3.88508	8.72915	2.78332	5.96979	2.10406	16.4864	4.69428	1.78941	0.00693719	0.336189	Svopl	6	37983739	38046996	-	5814	protein_coding	SV2 related protein homolog (rat)-like [Source:MGI Symbol;Acc:MGI:2444335]	-	20	17	16	18	6	4	10	3	6	2	0.193524	0.128614	0.0721103	0.128297	0.0455849	0.0262119	0.0606193	0.018965	0.0399188	0.0148478
ENSMUSG00000028334	654.952	625.372	721.35	615.001	634.994	947.961	848.474	802.523	699.46	834.261	650.334	826.536	-0.345029	0.00697988	0.337429	Nans	4	46489248	46503632	+	4581	protein_coding	N-acetylneuraminic acid synthase (sialic acid synthase) [Source:MGI Symbol;Acc:MGI:2149820]	-	474	578	1065	587	568	976	972	865	703	793	5.82101	5.54987	6.09174	5.31004	5.47687	8.11715	7.47811	6.94003	5.93603	7.4717
ENSMUSG00000029757	1.38176	0	43.3487	1.0477	6.70768	0	0	0	0	2.10406	10.4972	0.420813	4.75133	0.00703428	0.3386	Dync1i1	6	5725639	6028039	+	3572	protein_coding	dynein cytoplasmic 1 intermediate chain 1 [Source:MGI Symbol;Acc:MGI:107743]	-	1	0	64	1	6	0	0	0	0	2	0.0157496	0	0.469484	0.0116013	0.0741967	0	0	0	0	0.0241671
ENSMUSG00000080845	11.054	8.65567	6.09591	8.38162	8.94357	28.1669	20.95	14.8444	13.9295	28.4049	8.62616	21.2591	-1.32154	0.00703842	0.3386	Gm9115	X	102724402	102725749	-	1348	processed_pseudogene	predicted gene 9115 [Source:MGI Symbol;Acc:MGI:3648181]	-	8	8	9	8	8	29	24	16	14	27	0.333872	0.261045	0.174946	0.245935	0.262147	0.819638	0.627491	0.43625	0.401735	0.864531
ENSMUSG00000028480	245.952	305.112	205.906	189.634	260.482	490.492	277.587	299.67	301.474	527.068	241.417	379.258	-0.652254	0.00708012	0.339615	Glipr2	4	43957401	43979118	+	2320	protein_coding	GLI pathogenesis-related 2 [Source:MGI Symbol;Acc:MGI:1917770]	-	178	282	304	181	233	505	318	323	303	501	4.3163	5.34659	3.43351	3.23304	4.43621	8.29311	4.83087	5.11706	5.05191	9.32087
ENSMUSG00000023008	659.097	596.159	791.114	800.445	661.824	576.935	506.291	614.185	493.503	470.258	701.728	532.234	0.399792	0.00709396	0.339615	Fmnl3	15	99317225	99370482	-	5021	protein_coding	formin-like 3 [Source:MGI Symbol;Acc:MGI:109569]	-	477	551	1168	764	592	594	580	662	496	447	5.34451	4.827	6.09544	6.30555	5.20806	4.50724	4.07121	4.84589	3.82114	3.84259
ENSMUSG00000046031	98.1046	56.2618	63.6684	78.5777	41.364	442.9	118.716	45.4608	52.7331	250.384	67.5953	182.039	-1.43058	0.00715053	0.341494	Calhm6	10	34126067	34127984	-	1094	protein_coding	calcium homeostasis modulator family member 6 [Source:MGI Symbol;Acc:MGI:2443082]	-	71	52	94	75	37	456	136	49	53	238	3.65108	2.09075	2.25145	2.84095	1.49393	15.8804	4.38135	1.64621	1.87396	9.39001
ENSMUSG00000000791	2.76351	4.32783	5.41859	8.38162	5.58973	45.6497	5.23749	8.34995	32.8338	11.5723	5.29626	20.7287	-1.95461	0.00719883	0.34297	Il12rb1	8	70808449	70821424	+	4105	protein_coding	interleukin 12 receptor, beta 1 [Source:MGI Symbol;Acc:MGI:104579]	-	2	4	8	8	5	47	6	9	33	11	0.0274092	0.042861	0.0510657	0.0807601	0.0538024	0.436213	0.0515139	0.0805814	0.310958	0.115661
ENSMUSG00000078302	5.52702	7.57371	21.6744	14.6678	0	0.971271	0	1.85554	0	2.10406	9.88859	0.986176	3.35579	0.00724206	0.343249	Foxd1	13	98354242	98359305	+	5064	protein_coding	forkhead box D1 [Source:MGI Symbol;Acc:MGI:1347463]	Fork	4	7	32	14	0	1	0	2	0	2	0.0444372	0.0608023	0.16558	0.114566	0	0.00752351	0	0.0145158	0	0.0170468
ENSMUSG00000044408	1319.58	1129.56	1040.37	1042.46	1170.49	1439.42	1508.4	1442.69	1226.79	1813.7	1140.49	1486.2	-0.382755	0.00725235	0.343249	Sptssa	12	54645392	54656573	-	1518	protein_coding	serine palmitoyltransferase, small subunit A [Source:MGI Symbol;Acc:MGI:1913399]	-	955	1044	1536	995	1047	1482	1728	1555	1233	1724	35.3925	30.2513	26.5138	27.1626	30.4663	37.1955	40.1197	37.6499	31.419	49.0199
ENSMUSG00000036473	422.817	502.029	666.487	403.365	479.599	380.738	381.464	357.192	361.172	265.112	494.859	349.136	0.505165	0.00725689	0.343249	Tbc1d24	17	24175431	24209387	-	13362	protein_coding	TBC1 domain family, member 24 [Source:MGI Symbol;Acc:MGI:2443456]	-	306	464	984	385	429	392	437	385	363	252	1.28834	1.52743	1.92964	1.19401	1.41818	1.11771	1.15265	1.059	1.05084	0.814021
ENSMUSG00000095351	6.90878	119.015	0	9.42932	29.0666	2895.36	80.3082	7.42218	357.192	18.9366	32.884	671.844	-4.35318	0.00728369	0.343693	Igkv3-2	6	70698449	70699067	+	378	IG_V_gene	immunoglobulin kappa variable 3-2 [Source:MGI Symbol;Acc:MGI:1330850]	-	5	110	0	9	26	2981	92	8	359	18	0.744146	12.8002	0	0.986667	3.03827	300.458	8.57792	0.777864	36.737	2.05536
ENSMUSG00000022756	27.6351	27.049	257.383	115.247	55.8973	55.3625	32.2979	6.49441	25.8691	29.4569	96.6423	29.8961	1.69887	0.00732972	0.344405	Slc7a4	16	17572018	17583214	-	4153	protein_coding	solute carrier family 7 (cationic amino acid transporter, y+ system), member 4 [Source:MGI Symbol;Acc:MGI:2146512]	-	20	25	380	110	50	57	37	7	26	28	0.270924	0.264785	2.39758	1.09762	0.531805	0.52291	0.313997	0.0619501	0.242166	0.291006
ENSMUSG00000030651	1.38176	4.32783	2.03197	0	0	44.6785	2.61875	2.78332	3.97986	13.6764	1.54831	13.5474	-3.11122	0.0073337	0.344405	Art2b	7	101576970	101585600	-	2828	protein_coding	ADP-ribosyltransferase 2b [Source:MGI Symbol;Acc:MGI:107545]	-	1	4	3	0	0	46	3	3	4	13	0.019893	0.0622152	0.0277968	0	0	0.619716	0.0373876	0.0389895	0.0547119	0.198413
ENSMUSG00000068270	312.277	305.112	271.607	379.268	238.123	175.8	139.666	304.309	175.114	100.995	301.277	179.177	0.748597	0.00738276	0.344597	Shroom4	X	6399854	6637448	+	8880	protein_coding	shroom family member 4 [Source:MGI Symbol;Acc:MGI:2685570]	-	226	282	401	362	213	181	160	328	176	96	1.43178	1.39686	1.18327	1.68933	1.05953	0.776569	0.635028	1.35758	0.766656	0.466622
ENSMUSG00000036006	89.8141	50.852	44.7034	80.6731	29.0666	427.359	68.0874	24.1221	238.792	105.203	59.0218	172.713	-1.55141	0.00738557	0.344597	Ripor2	13	24582189	24733816	+	11662	protein_coding	RHO family interacting cell polarization regulator 2 [Source:MGI Symbol;Acc:MGI:2444879]	-	65	47	66	77	26	440	78	26	240	100	0.31356	0.177272	0.148294	0.273614	0.0984793	1.43745	0.235726	0.0819419	0.796048	0.370112
ENSMUSG00000028007	498.814	562.618	358.982	352.028	430.41	574.021	644.211	629.03	524.346	668.04	440.57	607.93	-0.466731	0.00739022	0.344597	Snx7	3	117781647	117868936	-	6147	protein_coding	sorting nexin 7 [Source:MGI Symbol;Acc:MGI:1923811]	-	361	520	530	336	385	591	738	678	527	635	3.30388	3.72097	2.25925	2.26514	2.76657	3.66301	4.23135	4.05389	3.31626	4.45879
ENSMUSG00000004040	1445.32	1512.58	1460.99	1651.18	1756.29	2074.64	1923.91	1845.34	1748.15	2095.65	1565.27	1937.54	-0.307827	0.0074356	0.345159	Stat3	11	100885098	100939540	-	9527	protein_coding	signal transducer and activator of transcription 3 [Source:MGI Symbol;Acc:MGI:103038]	STAT	1046	1398	2157	1576	1571	2136	2204	1989	1757	1992	6.17669	6.45456	5.93262	6.8552	7.28391	8.54199	8.15345	7.67334	7.13373	9.02484
ENSMUSG00000022151	439.398	403.571	333.243	391.841	412.522	548.768	537.716	421.209	573.1	514.443	396.115	519.047	-0.39259	0.00743726	0.345159	Ttc33	15	5185525	5218336	+	2163	protein_coding	tetratricopeptide repeat domain 33 [Source:MGI Symbol;Acc:MGI:1914765]	-	318	373	492	374	369	565	616	454	576	489	8.27086	7.58522	5.9602	7.16531	7.53554	9.9519	10.0371	7.71445	10.3007	9.75796
ENSMUSG00000021186	1445.32	1487.69	1824.03	1790.52	1046.4	1078.11	995.123	899.939	1228.78	1231.93	1518.79	1086.78	0.48362	0.00745965	0.345385	Fbln5	12	101746565	101819055	-	6911	protein_coding	fibulin 5 [Source:MGI Symbol;Acc:MGI:1346091]	-	1046	1375	2693	1709	936	1110	1140	970	1235	1171	8.51473	8.7514	10.2105	10.2476	5.98246	6.11922	5.81366	5.15866	6.91237	7.31345
ENSMUSG00000021109	1307.14	1419.53	1030.21	1227.91	1280.05	1976.54	1875.89	1709.88	1112.37	2302.9	1252.97	1795.52	-0.519449	0.00750049	0.345597	Hif1a	12	73901375	73947530	+	5896	protein_coding	hypoxia inducible factor 1, alpha subunit [Source:MGI Symbol;Acc:MGI:106918]	-	946	1312	1521	1172	1145	2035	2149	1843	1118	2189	9.02638	9.78795	6.75965	8.2374	8.57813	13.1499	12.8459	11.4888	7.33475	16.0249
ENSMUSG00000037337	174.101	192.589	222.84	147.726	173.282	789.643	254.891	192.049	215.907	314.557	182.107	353.41	-0.955374	0.0075131	0.345597	Map4k1	7	28982050	29003279	+	3077	protein_coding	mitogen-activated protein kinase kinase kinase kinase 1 [Source:MGI Symbol;Acc:MGI:1346882]	-	126	178	329	141	155	813	292	207	217	299	2.30369	2.54453	2.80169	1.89894	2.2251	10.0665	3.34458	2.47257	2.72793	4.19421
ENSMUSG00000023868	109.159	104.95	224.871	89.0547	76.0204	63.1326	41.8999	33.3998	99.4965	61.0178	120.811	59.7893	1.02193	0.00751678	0.345597	Pde10a	17	8525372	8986648	+	12849	protein_coding	phosphodiesterase 10A [Source:MGI Symbol;Acc:MGI:1345143]	-	79	97	332	85	68	65	48	36	100	58	0.34589	0.332061	0.67705	0.274138	0.233768	0.192734	0.131661	0.102977	0.301045	0.194834
ENSMUSG00000021719	176.865	325.67	165.267	365.648	383.456	388.508	689.603	809.945	266.651	467.102	283.381	524.362	-0.8886	0.00755266	0.346439	Rgs7bp	13	104945904	105054930	-	7077	protein_coding	regulator of G-protein signalling 7 binding protein [Source:MGI Symbol;Acc:MGI:106334]	-	128	301	244	349	343	400	790	873	268	444	1.01752	1.87082	0.903427	2.0436	2.14087	2.1534	3.93427	4.53389	1.46483	2.70795
ENSMUSG00000039195	1738.25	1761.43	1402.74	1731.85	2146.46	1491.87	1313.74	1301.66	1180.03	1439.18	1756.14	1345.3	0.383963	0.0076188	0.346987	1110008P14Rik	2	32377097	32381938	-	2694	protein_coding	RIKEN cDNA 1110008P14 gene [Source:MGI Symbol;Acc:MGI:1920987]	-	1258	1628	2071	1653	1920	1536	1505	1403	1186	1368	26.2702	26.5811	20.1435	25.427	31.481	21.7224	19.6891	19.1411	17.029	21.9177
ENSMUSG00000038555	11.054	29.2129	339.339	51.3374	16.7692	32.0519	11.3479	32.472	20.8943	12.6244	89.5426	21.8781	2.03951	0.00762317	0.346987	Reep2	18	34840589	34847463	+	1926	protein_coding	receptor accessory protein 2 [Source:MGI Symbol;Acc:MGI:2385070]	-	8	27	501	49	15	33	13	35	21	12	0.233676	0.616628	6.81607	1.05429	0.344017	0.652788	0.237888	0.667909	0.421759	0.268925
ENSMUSG00000022035	572.047	513.93	407.072	497.659	603.691	653.665	583.107	807.162	653.692	851.094	518.88	709.744	-0.453602	0.00763066	0.346987	Ccdc25	14	65837302	65866607	+	4897	protein_coding	coiled-coil domain containing 25 [Source:MGI Symbol;Acc:MGI:1914429]	-	414	475	601	475	540	673	668	870	657	809	4.75609	4.26657	3.21586	4.0196	4.87089	5.23599	4.80764	6.52972	5.18963	7.13058
ENSMUSG00000035354	790.364	669.732	560.824	673.673	599.219	948.932	899.103	809.945	724.334	933.152	658.763	863.093	-0.391691	0.00763499	0.346987	Uvrag	7	98885021	99141141	-	9035	protein_coding	UV radiation resistance associated gene [Source:MGI Symbol;Acc:MGI:1925860]	-	572	619	828	643	536	977	1030	873	728	887	3.56162	3.01355	2.40134	2.94919	2.62048	4.11984	4.01786	3.55134	3.11677	4.23742
ENSMUSG00000033880	4696.59	4283.47	3146.17	2837.18	4505.33	6143.29	4627.32	5335.62	4654.44	6858.19	3893.75	5523.77	-0.504721	0.00766413	0.347134	Lgals3bp	11	118392751	118402092	-	2847	protein_coding	lectin, galactoside-binding, soluble, 3 binding protein [Source:MGI Symbol;Acc:MGI:99554]	-	3399	3959	4645	2708	4030	6325	5301	5751	4678	6519	67.1651	61.1665	42.7514	39.4168	62.5262	84.6423	65.623	74.244	63.5585	98.8326
[truncated: 1,042 more rows]

## Sheet: eWAT
gene_id	eW1KOSFN	eW2KOSFN	eW3KOSFN	eW4KOSFN	eW5KOSFN	eW6_KO_C	eW7_KO_C	eW8_KO_C	eW9_KO_C	eW10_KO_C	eWKOSFN	eW_KO_C	log2FoldChange	pvalue	padj	gene_name	gene_chr	gene_start	gene_end	gene_strand	gene_length	gene_biotype	gene_description	tf_family	eW1KOSFN_count	eW2KOSFN_count	eW3KOSFN_count	eW4KOSFN_count	eW5KOSFN_count	eW6_KO_C_count	eW7_KO_C_count	eW8_KO_C_count	eW9_KO_C_count	eW10_KO_C_count	eW1KOSFN_fpkm	eW2KOSFN_fpkm	eW3KOSFN_fpkm	eW4KOSFN_fpkm	eW5KOSFN_fpkm	eW6_KO_C_fpkm	eW7_KO_C_fpkm	eW8_KO_C_fpkm	eW9_KO_C_fpkm	eW10_KO_C_fpkm
[truncated: 906 more rows]

[truncated: 2 more sheets: Liver, Skeletal Muscle]
