# Supplementary material for: Sulforaphane reduces obesity by reversing leptin resistance
Source: eLife. 2022 Mar 24;11:e67368. doi: 10.7554/eLife.67368 (PMC8947770; doi:10.7554/eLife.67368)
Supplement: Supplementary file 3. — NRF2 is identified as the most significant transcription factor only for the skeletal muscle gene set in WT mice. [file elife-67368-supp3.xlsx]

## Sheet: Sk Muscle SFN ENCODE_and_ChEA_C
Term	Overlap	P-value	Adjusted P-value	Old P-value	Old Adjusted P-value	Odds Ratio	Combined Score	Genes
NFE2L2 CHEA	13/1022	0.000570519	0.0513467	0	0	3.2044	23.9335	TGIF1;ZRSR1;NAPB;CDKN1A;OAT;TXNRD1;PRKCD;OSGIN1;SHISA2;PRDX1;HMOX1;SLC16A9;GCLM
ZC3H11A ENCODE	3/129	0.0199096	0.534679	0	0	5.47757	21.4532	BRPF1;NFIL3;PTPRF
CREB1 CHEA	12/1444	0.0260322	0.534679	0	0	2.01106	7.33721	MAP2K3;CDKN1A;DAXX;OAT;BRPF1;NFIL3;SECISBP2;IFRD1;NOLC1;CCNL2;TRMT61A;SF1
RUNX1 CHEA	11/1294	0.0283161	0.534679	0	0	2.04756	7.29819	EDC4;GTF2A1;CACNA1I;SECISBP2;PRDX1;RORC;CRY1;MTHFR;PTPRF;FTSJ3;FAM129B
GATA2 CHEA	7/772	0.0563063	0.534679	0	0	2.13649	6.14657	PNMT;MAP2K3;PPP1R15A;CDKN1A;SLC20A1;MICAL2;PTPRF
FOSL2 ENCODE	3/196	0.0570711	0.534679	0	0	3.56392	10.2051	SLC20A1;IFRD1;FAM129B
YY1 CHEA	4/332	0.0608547	0.534679	0	0	2.80961	7.86485	DAXX;EHD3;SNW1;SMCR8
FOXA1 ENCODE	3/205	0.0635422	0.534679	0	0	3.40358	9.38044	PPP1R15A;ZFAND3;TRMT61A
GATA1 CHEA	7/807	0.0680327	0.534679	0	0	2.03928	5.48112	PNMT;PPP1R15A;SLC20A1;EIF4EBP1;MICAL2;MTHFR;PTPRF
MYC ENCODE	11/1515	0.0726862	0.534679	0	0	1.72597	4.52481	GTF2A1;SLC20A1;ASCC1;SECISBP2;HEATR1;EIF4EBP1;NOLC1;TRMT61A;APRT;FKBP5;ARF6
SALL4 CHEA	4/355	0.0738884	0.534679	0	0	2.62242	6.83194	SLC20A1;ARID5B;HMOX1;RANBP9
MAX ENCODE	14/2073	0.0739153	0.534679	0	0	1.61844	4.21578	GTF2A1;SLC20A1;SECISBP2;HEATR1;NOLC1;MICAL2;APRT;IMPACT;PRDX1;CRY1;EIF4EBP1;SMCR8;TRMT61A;ARF6
TCF3 ENCODE	7/840	0.0803535	0.534679	0	0	1.95511	4.92947	GTF2A1;SLC20A1;TXNRD1;EIF4EBP1;CCNL2;ASB2;FKBP5
E2F1 CHEA	7/859	0.088005	0.534679	0	0	1.90961	4.64104	TGIF1;GTF2A1;CDKN1A;BRPF1;SLC20A1;NOLC1;MTHFR
EZH2 CHEA	3/237	0.0891132	0.534679	0	0	2.93336	7.09243	CACNA1I;SLC16A9;ZDHHC14
ZKSCAN1 ENCODE	2/120	0.0999122	0.562006	0	0	3.85603	8.88222	MAP2K3;LPIN1
SMAD4 CHEA	5/584	0.118998	0.629988	0	0	1.98742	4.23052	TINAGL1;SLC20A1;ARID5B;MICAL2;LPIN1
CEBPB ENCODE	2/144	0.134792	0.669705	0	0	3.20042	6.41373	NFIL3;ARID5B
KLF4 CHEA	7/987	0.149838	0.669705	0	0	1.64904	3.13021	TGIF1;GTF2A1;CDKN1A;PRDX1;IFRD1;MTHFR;SMCR8
EGR1 CHEA	3/315	0.165432	0.669705	0	0	2.1913	3.94258	RORC;RANBP9;FKBP5
FOXA2 ENCODE	3/316	0.166514	0.669705	0	0	2.18419	3.91555	PPP1R15A;PRKCD;TRMT61A
CHD1 ENCODE	5/655	0.167228	0.669705	0	0	1.76383	3.15443	GTF2A1;SNW1;ZFAND3;SLC20A1;GCLM
PML ENCODE	10/1596	0.171147	0.669705	0	0	1.46256	2.58176	EDC4;PPP1R15A;GTF2A1;ZFAND3;SLC20A1;SECISBP2;PRDX1;NOLC1;APRT;ARF6
USF1 ENCODE	9/1423	0.181293	0.67985	0	0	1.47165	2.51305	GTF2A1;SLC20A1;HEATR1;CRY1;HMOX1;MTHFR;SMCR8;APRT;FKBP5
ZMIZ1 ENCODE	6/914	0.221587	0.797711	0	0	1.5129	2.27985	EDC4;GTF2A1;OAT;ZFAND3;SLC20A1;PRDX1
SIN3A ENCODE	7/1131	0.238062	0.804181	0	0	1.42684	2.04784	GTF2A1;PRDX1;HEATR1;NOLC1;MTHFR;LPIN1;TRMT61A
REST ENCODE	3/383	0.242969	0.804181	0	0	1.79293	2.53668	SCN3B;TRMT61A;SF1
MYC CHEA	4/573	0.251457	0.804181	0	0	1.59967	2.20832	MAP2K3;EIF4EBP1;NOLC1;TRMT61A
USF2 ENCODE	6/965	0.259125	0.804181	0	0	1.4286	1.92924	GTF2A1;SLC20A1;HMOX1;MTHFR;SMCR8;FKBP5
NANOG CHEA	4/595	0.273041	0.811565	0	0	1.53837	1.99701	SECISBP2;NOLC1;SMCR8;FKBP5
NELFE ENCODE	2/234	0.279539	0.811565	0	0	1.94996	2.48545	SLC20A1;PRDX1
UBTF ENCODE	9/1631	0.300424	0.844942	0	0	1.2685	1.52545	MAP2K3;GTF2A1;SNW1;RANBP9;LPIN1;GCLM;ZDHHC14;FKBP5;ARF6
SPI1 CHEA	6/1056	0.329797	0.898286	0	0	1.29852	1.44042	DAXX;OSGIN1;RANBP9;SMCR8;SF1;ARF6
BCL3 ENCODE	2/273	0.343424	0.898286	0	0	1.66603	1.78063	NOLC1;CCNL2
PPARD CHEA	2/285	0.362775	0.898286	0	0	1.59441	1.61669	TINAGL1;OSGIN1
ZBTB7A ENCODE	2184-11-01	0.379481	0.898286	0	0	1.15118	1.11544	PNMT;GINS1;NAPB;GTF2A1;ZFAND3;EIF4EBP1;OSGIN1;MTHFR;RANBP9;ZDHHC14;SNTA1
RCOR1 ENCODE	4/702	0.381024	0.898286	0	0	1.29533	1.24986	PRKCD;OSGIN1;RANBP9;ZDHHC14
ZBTB33 ENCODE	4/702	0.381024	0.898286	0	0	1.29533	1.24986	PPP1R15A;GTF2A1;PRDX1;SF1
ATF3 ENCODE	1/114	0.39943	0.898286	0	0	1.99095	1.82713	NOLC1
CEBPD ENCODE	4/734	0.41341	0.898286	0	0	1.23649	1.09221	PPP1R15A;GTF2A1;OAT;NFIL3
TRIM28 ENCODE	1/120	0.41538	0.898286	0	0	1.88999	1.66048	PPP1R15A
PPARG CHEA	3/535	0.42681	0.898286	0	0	1.2707	1.08189	GTF2A1;CDKN1A;SLC20A1
EGR1 ENCODE	3/537	0.429181	0.898286	0	0	1.26581	1.07072	EDC4;SECISBP2;APRT
EZH2 ENCODE	2/338	0.445347	0.898966	0	0	1.33929	1.08335	PNMT;SLC16A9
YY1 ENCODE	13/2753	0.454723	0.898966	0	0	1.07195	0.844769	NAPB;GTF2A1;SLC20A1;NOLC1;MTHFR;CDKAL1;APRT;FTSJ3;EHD3;SNW1;SMCR8;CCNL2;SF1
NR2C2 ENCODE	2/350	0.463244	0.898966	0	0	1.29231	0.994435	IMPACT;FTSJ3
ERG CHEA	1/144	0.475097	0.898966	0	0	1.57088	1.16911	SF1
ESR1 CHEA	1/154	0.49816	0.898966	0	0	1.46747	1.02258	NFIL3
REST CHEA	6/1280	0.508453	0.898966	0	0	1.0575	0.715272	TXNRD1;CRY1;SCN3B;TRMT61A;APRT;ARNTL
BCLAF1 ENCODE	4/851	0.527702	0.898966	0	0	1.05918	0.677055	EDC4;SECISBP2;PRDX1;GCLM
STAT3 CHEA	1/177	0.547473	0.898966	0	0	1.27421	0.767639	ARID5B
FLI1 ENCODE	3/650	0.556173	0.898966	0	0	1.03864	0.609345	BRPF1;NOLC1;MTHFR
BRCA1 ENCODE	14/3218	0.581515	0.898966	0	0	0.973358	0.527676	PPP1R15A;GTF2A1;ZFAND3;SECISBP2;NOLC1;MTHFR;RANBP9;APRT;PRDX1;EIF4EBP1;CCNL2;FKBP5;SF1;ARF6
GABPA ENCODE	2082-09-01	0.587994	0.898966	0	0	0.968054	0.514073	EDC4;IMPACT;SNW1;SECISBP2;NOLC1;MTHFR;SMCR8;CCNL2;FTSJ3
NRF1 ENCODE	8/1882	0.607484	0.898966	0	0	0.950604	0.47381	NAPB;GTF2A1;SNW1;ZFAND3;ASCC1;CDKAL1;APRT;SF1
TRIM28 CHEA	1/210	0.609966	0.898966	0	0	1.07123	0.529562	TXNRD1
E2F4 ENCODE	3/710	0.616562	0.898966	0	0	0.947535	0.458225	GINS1;GTF2A1;NOLC1
ATF2 ENCODE	2852-12-01	0.6292	0.898966	0	0	0.936766	0.43401	PPP1R15A;GTF2A1;ASCC1;SECISBP2;PRDX1;HEATR1;NOLC1;RANBP9;CDKAL1;CCNL2;APRT;SF1
SUZ12 CHEA	7/1684	0.630492	0.898966	0	0	0.928182	0.428129	CACNA1I;NFIL3;SLC16A9;SHISA2;HOXC11;ZDHHC14;SLC7A2
STAT3 ENCODE	3/725	0.630785	0.898966	0	0	0.927124	0.427209	SLC20A1;HEATR1;GCLM
STAT5A ENCODE	1/233	0.648396	0.898966	0	0	0.963901	0.417614	PPP1R15A
TCF3 CHEA	4/1006	0.660796	0.898966	0	0	0.888059	0.367932	ARID5B;SMCR8;GCLM;APRT
PBX3 ENCODE	5/1269	0.673559	0.898966	0	0	0.878117	0.347014	MAP2K3;PPP1R15A;ZFAND3;CCNL2;ARNTL
SOX2 CHEA	3/775	0.675582	0.898966	0	0	0.864818	0.339165	ARID5B;CDKAL1;ZDHHC14
HNF4A ENCODE	5/1276	0.678323	0.898966	0	0	0.872953	0.338821	TINAGL1;SLC20A1;PRKCD;CCNL2;ARF6
ELF1 ENCODE	2483-10-01	0.680054	0.898966	0	0	0.892577	0.344162	GTF2A1;ZFAND3;SECISBP2;HEATR1;CDKAL1;SMCR8;CCNL2;ZDHHC14;APRT;SF1
POU5F1 CHEA	1/261	0.690157	0.898966	0	0	0.858872	0.318501	TGIF1
SPI1 ENCODE	6/1540	0.690571	0.898966	0	0	0.866009	0.320628	PPP1R15A;ZFAND3;PRKCD;SMCR8;SF1;ARF6
IRF1 ENCODE	1/263	0.692945	0.898966	0	0	0.852229	0.312602	ZDHHC14
SIX5 ENCODE	4/1094	0.724365	0.898966	0	0	0.812563	0.26202	NAPB;SNW1;ZDHHC14;FTSJ3
AR CHEA	4/1095	0.725034	0.898966	0	0	0.811775	0.261015	TXNRD1;MICAL2;PTPRF;FKBP5
SRF ENCODE	1/299	0.739088	0.898966	0	0	0.747903	0.226119	SECISBP2
TP63 CHEA	5/1399	0.754576	0.898966	0	0	0.790676	0.222654	CDKN1A;TINAGL1;ASB2;APRT;FAM129B
TP53 CHEA	1/319	0.761687	0.898966	0	0	0.70015	0.190594	CDKN1A
FOS ENCODE	2/637	0.780351	0.898966	0	0	0.697837	0.173071	MTHFR;CCNL2
TAF7 ENCODE	2/640	0.782579	0.898966	0	0	0.694447	0.170251	PRDX1;SLC16A9
BHLHE40 ENCODE	1/348	0.791059	0.898966	0	0	0.640686	0.150166	MTHFR
CREB1 ENCODE	2238-08-01	0.792597	0.898966	0	0	0.783081	0.18202	PPP1R15A;GTF2A1;SECISBP2;NOLC1;CCNL2;TRMT61A;SF1;ARF6
IRF3 ENCODE	2/663	0.799022	0.898966	0	0	0.669484	0.15021	CCNL2;ARNTL
E2F6 ENCODE	3245-12-01	0.799081	0.898966	0	0	0.80395	0.180321	PNMT;GINS1;GTF2A1;IMPACT;SECISBP2;EIF4EBP1;NOLC1;MICAL2;SMCR8;TRMT61A;APRT;ARF6
TAF1 ENCODE	3346-12-01	0.832395	0.924883	0	0	0.774874	0.142149	GTF2A1;ZFAND3;SLC20A1;ASCC1;SECISBP2;PRDX1;SMCR8;CCNL2;APRT;FTSJ3;SF1;ARF6
NFYB ENCODE	13/3715	0.866382	0.950907	0	0	0.748944	0.10742	MAP2K3;GINS1;GTF2A1;OAT;SLC20A1;MICAL2;MTHFR;APRT;ARNTL;NFIL3;CRY1;CCNL2;SF1
NFYA ENCODE	2250-07-01	0.88581	0.950934	0	0	0.672423	0.0815328	MAP2K3;GINS1;OAT;CRY1;CCNL2;SF1;ARNTL
RELA ENCODE	1/484	0.887539	0.950934	0	0	0.457086	0.0545318	NOLC1
SMC3 ENCODE	3/1181	0.902782	0.951673	0	0	0.554734	0.0567351	NFIL3;CRY1;PTPRF
CTCF ENCODE	5/1790	0.909376	0.951673	0	0	0.604442	0.0574197	EHD3;SECISBP2;CRY1;GCLM;PTPRF
RFX5 ENCODE	1/559	0.92023	0.951962	0	0	0.394123	0.0327642	PPP1R15A
SP1 ENCODE	1/707	0.959654	0.981464	0	0	0.30912	0.0127304	CCNL2
SP2 ENCODE	1/994	0.989402	0.997055	0	0	0.216493	0.0023067	CCNL2
RAD21 ENCODE	1/1265	0.997055	0.997055	0	0	0.167641	0.000494479	PTPRF

## Sheet: BAT SFN ENCODE_and_ChEA_Consens
Term	Overlap	P-value	Adjusted P-value	Old P-value	Old Adjusted P-value	Odds Ratio	Combined Score	Genes
ESR1 CHEA	4/154	0.00748437	0.613718	0	0	5.48611	26.8542	C3;NFIL3;ID3;XDH
STAT5A ENCODE	4/233	0.0295572	0.818891	0	0	3.57915	12.6037	C1RL;HIST1H4H;HIST1H4I;HIST1H1C
NELFE ENCODE	4/234	0.0299594	0.818891	0	0	3.56341	12.5001	RPS28;PNP;BSG;HIST1H1C
PPARG CHEA	6/535	0.0518171	0.961384	0	0	2.33733	6.91858	CDKN1A;RETSAT;NABP1;DTX4;CIDEC;BCAT2
KLF4 CHEA	9/987	0.058621	0.961384	0	0	1.9135	5.42796	CDKN1A;BNIP3;MTHFR;NABP1;HIST1H4H;PRODH;FBXO31;HIST1H1C;BCAT2
CEBPD ENCODE	7/734	0.0749164	0.998783	0	0	1.98505	5.14402	NFIL3;BSG;C1RL;NABP1;HIST1H4H;FBXO31;HIST1H1C
ZMIZ1 ENCODE	8/914	0.0870648	0.998783	0	0	1.82302	4.45017	RPS28;PNP;RETSAT;NABP1;HIST1H4H;HIST1H4I;HIST1H1C;BCAT2
ZC3H11A ENCODE	2/129	0.13623	0.998783	0	0	3.17741	6.33387	NFIL3;TSHR
IRF1 ENCODE	3/263	0.144887	0.998783	0	0	2.33624	4.51315	LRG1;HIST1H4H;FAH
ETS1 ENCODE	2/156	0.18352	0.998783	0	0	2.61675	4.43652	FBXO31;HIST1H1C
EGR1 CHEA	3/315	0.209038	0.998783	0	0	1.94171	3.03924	SGCD;FAH;BCAT2
TAF7 ENCODE	5/640	0.216658	0.998783	0	0	1.59677	2.44215	RPS28;NABP1;HIST1H4H;HIST1H4I;HIST1H1C
RELA ENCODE	4/484	0.223632	0.998783	0	0	1.68576	2.52486	RPS28;LRG1;HIST1H4H;HIST1H4I
BHLHE40 ENCODE	3/348	0.252567	0.998783	0	0	1.75303	2.4123	BNIP3;BSG;MTHFR
E2F1 CHEA	6/859	0.259561	0.998783	0	0	1.42528	1.92237	CDKN1A;PGAP3;CBS;BSG;MTHFR;ID3
USF1 ENCODE	9/1423	0.281226	0.998783	0	0	1.29299	1.64028	COPRS;RPS28;PPA1;BSG;CRY1;ST3GAL5;MTHFR;PRDX6;FBXO31
HNF4A ENCODE	8/1276	0.306462	0.998783	0	0	1.27774	1.51113	C3;ALDH1L1;EPHX2;ACOT2;ACOT1;HIST1H4H;PKP4;AIG1
RUNX1 CHEA	8/1294	0.319947	0.998783	0	0	1.25864	1.43434	GRAMD1B;PEG3;CRY1;MTHFR;ID3;NABP1;PKP4;HIST1H1C
GATA2 CHEA	5/772	0.343176	0.998783	0	0	1.31291	1.40417	CDKN1A;NNMT;PPA1;EPHX2;NABP1
SOX2 CHEA	5/775	0.346163	0.998783	0	0	1.30759	1.38715	EPHX2;ACOT1;FAH;FBXO31;HIST1H1C
USF2 ENCODE	6/965	0.352459	0.998783	0	0	1.26069	1.31467	COPRS;RPS28;PPA1;BSG;ST3GAL5;MTHFR
SMC3 ENCODE	7/1181	0.377855	0.998783	0	0	1.20058	1.16846	NFIL3;NPR1;C1RL;CRY1;DTX4;TSHR;TMEM82
GATA1 CHEA	5/807	0.378111	0.998783	0	0	1.25331	1.21893	BSG;ST3GAL5;MTHFR;NABP1;HIST1H4H
TP63 CHEA	8/1399	0.400418	0.998783	0	0	1.15707	1.059	CDKN1A;LAMB3;SLC1A3;ST3GAL5;ADTRP;FAH;KCTD15;GRINA
NFE2L2 CHEA	6/1022	0.403831	0.998783	0	0	1.18638	1.07576	SLC22A12;GABARAPL1;CDKN1A;DTX4;PRDX6;HIST1H1C
NFIC ENCODE	2/279	0.40773	0.998783	0	0	1.44574	1.29705	ST3GAL5;HIST1H1C
PPARD CHEA	2/285	0.418166	0.998783	0	0	1.41465	1.2334	HIST1H4H;HIST1H1C
PBX3 ENCODE	7/1269	0.450823	0.998783	0	0	1.11162	0.885603	KLHL25;NABP1;HIST1H4H;DTX4;FBXO31;HIST1H1C;ARNTL
TRIM28 ENCODE	1/120	0.452999	0.998783	0	0	1.67906	1.32959	HIST1H4H
SUZ12 CHEA	9/1684	0.468511	0.998783	0	0	1.0761	0.815897	GRAMD1B;NFIL3;NPR1;TESC;ID3;ITGA7;HS3ST6;DTX4;GNAI1
STAT3 ENCODE	4/725	0.492842	0.998783	0	0	1.10836	0.784236	RETSAT;C1RL;HIST1H4H;HIST1H1C
YY1 CHEA	2/332	0.496487	0.998783	0	0	1.21027	0.847426	GRAMD1B;RPS28
CEBPB ENCODE	1/144	0.515387	0.998783	0	0	1.39556	0.925033	NFIL3
SALL4 CHEA	2/355	0.532347	0.998783	0	0	1.13008	0.71247	ID3;BCAT2
ZBTB7A ENCODE	2184-11-01	0.537225	0.998783	0	0	1.00827	0.626479	NPR1;CBS;TESC;ST3GAL5;MTHFR;NABP1;PKP4;KCTD15;FBXO31;MSRB1;GRINA
STAT3 CHEA	1/177	0.589818	0.998783	0	0	1.132	0.59763	KLHL25
NFYB ENCODE	18/3715	0.599411	0.998783	0	0	0.962065	0.492392	RETSAT;KLHL25;PGAP3;MTHFR;PRDX6;ARNTL;PNP;NFIL3;TMEM67;BSG;ACOT2;CRY1;NABP1;PKP4;NOL12;HIST1H1C;BCAT2;MSRB1
RAD21 ENCODE	6/1265	0.612073	0.998783	0	0	0.945076	0.463941	MORC4;NPR1;C1RL;DTX4;TSHR;TMEM82
SPI1 CHEA	5/1056	0.613452	0.998783	0	0	0.943913	0.461246	PGAP3;CTSZ;ID3;HIST1H4I;NOL12
TRIM28 CHEA	1/210	0.652914	0.998783	0	0	0.95167	0.405706	NNMT
SP1 ENCODE	3/707	0.6913	0.998783	0	0	0.843311	0.311334	KLHL25;SYT7;HIST1H1C
EZH2 CHEA	1/237	0.697312	0.998783	0	0	0.841637	0.303429	TESC
POU5F1 CHEA	1/261	0.732027	0.998783	0	0	0.763015	0.238013	EPHX2
CREB1 CHEA	6/1444	0.737112	0.998783	0	0	0.819489	0.249957	CDKN1A;PEG3;NFIL3;NABP1;HIST1H4H;SYT7
TCF3 CHEA	4/1006	0.747107	0.998783	0	0	0.785845	0.229111	EPHX2;ACOT1;SLC1A3;ID3
BCL3 ENCODE	1/273	0.747876	0.998783	0	0	0.728907	0.211761	HIST1H1C
SMAD4 CHEA	2/584	0.793789	0.998783	0	0	0.677397	0.156437	ID3;XDH
TCF3 ENCODE	3/840	0.796691	0.998783	0	0	0.704393	0.1601	BSG;NABP1;BCAT2
TP53 CHEA	1/319	0.800487	0.998783	0	0	0.622006	0.138418	CDKN1A
CTCF ENCODE	7/1790	0.80203	0.998783	0	0	0.764804	0.168722	NPR1;C1RL;CRY1;ST3GAL5;DTX4;TSHR;TMEM82
NANOG CHEA	2/595	0.802336	0.998783	0	0	0.664453	0.146331	EPHX2;KCTD15
FOS ENCODE	2/637	0.832172	0.998783	0	0	0.619155	0.113749	KLHL25;MTHFR
ZBTB33 ENCODE	2/702	0.870471	0.998783	0	0	0.559767	0.0776513	RPS28;HIST1H1C
E2F4 ENCODE	2/710	0.874592	0.998783	0	0	0.553211	0.074129	BSG;HIST1H1C
ZNF384 ENCODE	2/730	0.884378	0.998783	0	0	0.537452	0.0660374	TMEM67;ID3
REST CHEA	4/1280	0.889695	0.998783	0	0	0.60815	0.0710788	SGCD;CRY1;SYT7;ARNTL
SPI1 ENCODE	5/1540	0.892071	0.998783	0	0	0.629693	0.0719168	PNP;PGAP3;C1RL;CTSZ;ID3
MAX ENCODE	2073-07-01	0.904382	0.998783	0	0	0.649731	0.0653004	RPS28;PPA1;BSG;CRY1;NABP1;NOL12;PRDX6
AR CHEA	3/1095	0.916607	0.998783	0	0	0.532684	0.0463841	CAPN9;NNMT;LMNTD1
BCLAF1 ENCODE	2/851	0.930081	0.998783	0	0	0.457946	0.0331934	HIST1H4H;BCAT2
RFX5 ENCODE	1/559	0.941686	0.998783	0	0	0.350132	0.0210371	PKP4
MYC CHEA	1/573	0.945749	0.998783	0	0	0.341315	0.0190379	FBXO31
ATF2 ENCODE	2852-09-01	0.957909	0.998783	0	0	0.593372	0.0255167	GABARAPL1;RPS28;RETSAT;HIST1H4H;HIST1H4I;DTX4;NOL12;SYT7;HIST1H1C
FLI1 ENCODE	1/650	0.963567	0.998783	0	0	0.299622	0.01112	MTHFR
NRF1 ENCODE	5/1882	0.964457	0.998783	0	0	0.50537	0.0182891	RETSAT;PPA1;BNIP3;BSG;FBXO31
CHD1 ENCODE	1/655	0.964499	0.998783	0	0	0.297254	0.0107448	NABP1
IRF3 ENCODE	1/663	0.965941	0.998783	0	0	0.29354	0.010172	ARNTL
RCOR1 ENCODE	1/702	0.972181	0.998783	0	0	0.276647	0.00780504	BNIP3
NFYA ENCODE	2250-06-01	0.974689	0.998783	0	0	0.502219	0.0128755	KLHL25;TMEM67;CRY1;PKP4;HIST1H1C;ARNTL
SIN3A ENCODE	2/1131	0.979481	0.998783	0	0	0.339311	0.00703475	MTHFR;HIST1H1C
MYC ENCODE	3/1515	0.984082	0.998783	0	0	0.376125	0.00603518	RPS28;PPA1;NABP1
BRCA1 ENCODE	3218-09-01	0.986261	0.998783	0	0	0.514415	0.00711642	RPS28;C1RL;MTHFR;ID3;DTX4;AIG1;PRDX6;TMEM82;HIST1H1C
E2F6 ENCODE	3245-09-01	0.987415	0.998783	0	0	0.509298	0.0064502	PPA1;CBS;EPHX2;BNIP3;BSG;NABP1;PKP4;DTX4;BCAT2
PML ENCODE	3/1596	0.988675	0.998783	0	0	0.355427	0.0040483	RPS28;NABP1;HIST1H4H
ELF1 ENCODE	2483-06-01	0.988831	0.998783	0	0	0.448973	0.00504297	RETSAT;PGAP3;ID3;HIST1H4H;NOL12;FBXO31
CREB1 ENCODE	2238-05-01	0.990277	0.998783	0	0	0.416409	0.00406868	GABARAPL1;RPS28;HIST1H4H;AIG1;FBXO31
TAF1 ENCODE	3346-09-01	0.990989	0.998783	0	0	0.49089	0.00444354	RPS28;RETSAT;PGAP3;BSG;ID3;NABP1;HIST1H4H;PRDX6;FBXO31
SP2 ENCODE	1/994	0.993966	0.998783	0	0	0.192326	0.00116401	KLHL25
SIX5 ENCODE	1/1094	0.996443	0.998783	0	0	0.173806	0.000619258	RETSAT
UBTF ENCODE	2/1631	0.998035	0.998783	0	0	0.2289	0.00045033	ID3;DTX4
GABPA ENCODE	2082-03-01	0.998685	0.998783	0	0	0.265111	0.000348752	PGAP3;MTHFR;NOL12
YY1 ENCODE	2753-05-01	0.998783	0.998783	0	0	0.328507	0.000400053	RPS28;MTHFR;FBXO31;HIST1H1C;BCAT2

## Sheet: eWAT SFN ENCODE_and_ChEA_Consen
Term	Overlap	P-value	Adjusted P-value	Old P-value	Old Adjusted P-value	Odds Ratio	Combined Score	Genes
POU5F1 CHEA	3/261	0.142567	0.999996	0	0	2.35459	4.58661	IFITM1;GJB3;STMN2
VDR CHEA	1976-01-01	0.31728	0.999996	0	0	2.67003	3.06512	IL21R
NANOG CHEA	4/595	0.347032	0.999996	0	0	1.36132	1.44074	IFITM1;GJB3;SPP1;CD38
IRF1 ENCODE	2/263	0.379484	0.999996	0	0	1.53562	1.48792	MX1;ISG15
ZKSCAN1 ENCODE	1/120	0.452999	0.999996	0	0	1.67906	1.32959	DERL3
IRF8 CHEA	1/121	0.455751	0.999996	0	0	1.66498	1.30836	AIF1
ESR1 CHEA	1/154	0.539253	0.999996	0	0	1.30369	0.805122	GFRA1
SOX2 CHEA	4/775	0.54565	0.999996	0	0	1.03378	0.626239	IFITM1;GJB3;SPP1;CD38
TCF3 CHEA	5/1006	0.569841	0.999996	0	0	0.993691	0.55885	IFITM1;GJB3;STMN2;SPP1;CD38
REST ENCODE	2/383	0.573634	0.999996	0	0	1.04553	0.581068	SRRM3;STMN2
HDAC2 ENCODE	1/175	0.585649	0.999996	0	0	1.14513	0.612685	SRRM3
FOSL2 ENCODE	1/196	0.627415	0.999996	0	0	1.02072	0.475806	GPR39
TRIM28 CHEA	1/210	0.652914	0.999996	0	0	0.95167	0.405706	IGFBP3
SUZ12 CHEA	7/1684	0.747458	0.999996	0	0	0.817903	0.238072	TMEM132D;GREM2;IGFBP3;GPR88;DIO3;GFRA1;SSTR4
BCL3 ENCODE	1/273	0.747876	0.999996	0	0	0.728907	0.211761	IRF7
RUNX1 CHEA	5/1294	0.782949	0.999996	0	0	0.759912	0.185941	ZBP1;DERL3;TREML2;IL21R;IL12RB1
FLI1 ENCODE	2/650	0.840559	0.999996	0	0	0.606324	0.105311	TREML2;IL12RB1
KLF4 CHEA	3/987	0.87681	0.999996	0	0	0.594544	0.0781615	IFITM1;STMN2;SPP1
RAD21 ENCODE	4/1265	0.884203	0.999996	0	0	0.61588	0.0757957	IL6;IGFBP3;SPP1;STEAP1
REST CHEA	4/1280	0.889695	0.999996	0	0	0.60815	0.0710788	TMEM132D;CHL1;STMN2;IL12RB1
NFE2L2 CHEA	3/1022	0.891236	0.999996	0	0	0.57306	0.0659855	CCL8;IGFBP3;ZBTB8B
GATA2 CHEA	2/772	0.902691	0.999996	0	0	0.507024	0.0519067	GPR39;MAPK13
RELA ENCODE	1/484	0.914214	0.999996	0	0	0.406069	0.0364204	IL21R
PPARG CHEA	1/535	0.934009	0.999996	0	0	0.366322	0.0250087	SSTR4
SMC3 ENCODE	3/1181	0.939585	0.999996	0	0	0.491537	0.0306309	IL6;IGFBP3;STEAP1
SMAD4 CHEA	1/584	0.948744	0.999996	0	0	0.334685	0.01761	GPR39
SPI1 ENCODE	4/1540	0.954769	0.999996	0	0	0.498155	0.0230573	OAS3;TREML2;IRF7;IL18BP
TAF7 ENCODE	1/640	0.96163	0.999996	0	0	0.304469	0.0119125	SRRM3
SPI1 CHEA	2/1056	0.971294	0.999996	0	0	0.364907	0.0106283	SLAMF6;AIF1
ZNF384 ENCODE	1/730	0.97595	0.999996	0	0	0.265633	0.00646666	CTSC
CTCF ENCODE	4/1790	0.982218	0.999996	0	0	0.422592	0.00758197	IL6;IGFBP3;SPP1;STEAP1
GATA1 CHEA	1/807	0.983901	0.999996	0	0	0.239291	0.00388379	MAPK13
TCF3 ENCODE	1/840	0.986451	0.999996	0	0	0.229482	0.0031304	IL21R
BCLAF1 ENCODE	1/851	0.987209	0.999996	0	0	0.226381	0.00291424	SRRM3
E2F1 CHEA	1/859	0.987734	0.999996	0	0	0.224176	0.00276674	OAS3
SP2 ENCODE	1/994	0.993966	0.999996	0	0	0.192326	0.00116401	SRRM3
TP63 CHEA	2/1399	0.99404	0.999996	0	0	0.270302	0.00161587	OAS3;SLAMF6
PBX3 ENCODE	1/1269	0.998598	0.999996	0	0	0.148424	0.000208181	ZBTB8B
MYC ENCODE	1/1515	0.999625	0.999996	0	0	0.122667	4.5953e-05	CTSC
MAX ENCODE	2073-01-01	0.99998	0.999996	0	0	0.0869116	1.77846e-06	CTSC
ZBTB7A ENCODE	2184-01-01	0.999987	0.999996	0	0	0.0819787	1.02891e-06	SRRM3
NFYA ENCODE	2250-01-01	0.99999	0.999996	0	0	0.0792765	7.70388e-07	DERL3
E2F6 ENCODE	3245-03-01	0.999992	0.999996	0	0	0.158913	1.24344e-06	DERL3;IRF7;CTSC
NFYB ENCODE	3715-02-01	0.999996	0.999996	0	0	0.0889704	3.49401e-07	DERL3;CTSC
ATF2 ENCODE	2852-01-01	0.999996	0.999996	0	0	0.0604041	2.30725e-07	IRF7

## Sheet: Liver SFN ENCODE_and_ChEA_Conse
Term	Overlap	P-value	Adjusted P-value	Old P-value	Old Adjusted P-value	Odds Ratio	Combined Score	Genes
EZH2 ENCODE	5/338	0.0273998	0.999996	0	0	3.09262	11.1248	CADM4;APLP1;GRM8;CSPG5;HAPLN4
EZH2 CHEA	4/237	0.0311856	0.999996	0	0	3.51699	12.1962	GRM8;NPTX1;CXCL14;HAPLN4
ZKSCAN1 ENCODE	1/120	0.452999	0.999996	0	0	1.67906	1.32959	DERL3
EGR1 CHEA	2/315	0.468903	0.999996	0	0	1.27711	0.967228	IGDCC4;PRTN3
FOXA2 ENCODE	2/316	0.47055	0.999996	0	0	1.27298	0.959635	FGL1;SARM1
ZC3H11A ENCODE	1/129	0.477275	0.999996	0	0	1.56029	1.15409	ANKRD2
CEBPB ENCODE	1/144	0.515387	0.999996	0	0	1.39556	0.925033	PYCR1
SALL4 CHEA	2/355	0.532347	0.999996	0	0	1.13008	0.71247	ASNS;FAM81A
RFX5 ENCODE	3/559	0.53251	0.999996	0	0	1.07602	0.678059	SDF2L1;PSAT1;LRRC73
ESR1 CHEA	1/154	0.539253	0.999996	0	0	1.30369	0.805122	CAPN8
MYOD1 ENCODE	1/166	0.56636	0.999996	0	0	1.20814	0.68686	TTC9
STAT3 CHEA	1/177	0.589818	0.999996	0	0	1.132	0.59763	ASNS
FOS ENCODE	3/637	0.621599	0.999996	0	0	0.939835	0.446854	PSAT1;HIST1H3D;NUCB2
NELFE ENCODE	1/234	0.692671	0.999996	0	0	0.852603	0.313077	HIST1H3D
KLF4 CHEA	4/987	0.733464	0.999996	0	0	0.80184	0.248552	FABP5;SPP1;ASNS;HIST1H3D
IRF1 ENCODE	1/263	0.734736	0.999996	0	0	0.757113	0.233376	LRG1
SUZ12 CHEA	7/1684	0.747458	0.999996	0	0	0.817903	0.238072	ATG9B;GRM8;NPTX1;CHRDL2;SLC13A5;CXCL14;HAPLN4
PPARG CHEA	2/535	0.751707	0.999996	0	0	0.741548	0.211644	FABP5;CYB561
RAD21 ENCODE	5/1265	0.765828	0.999996	0	0	0.778613	0.207732	SDF2L1;SCARA5;GRM8;SPP1;ANKRD2
NANOG CHEA	2/595	0.802336	0.999996	0	0	0.664453	0.146331	SPP1;ASNS
AR CHEA	4/1095	0.804089	0.999996	0	0	0.718339	0.156631	SCARA5;GMDS;FABP5;PSAT1
YY1 CHEA	1/332	0.813275	0.999996	0	0	0.59718	0.123429	CAPN8
TP63 CHEA	5/1399	0.837048	0.999996	0	0	0.698709	0.124282	FABP5;GRM8;CDHR2;FAM81A;CYB561
E2F6 ENCODE	13/3245	0.844967	0.999996	0	0	0.770613	0.129816	ISYNA1;SDF2L1;CADM4;DERL3;APLP1;PYCR1;ENHO;FABP5;PSAT1;GRM8;CDHR2;CYB561;NUCB2
IRF3 ENCODE	2/663	0.848569	0.999996	0	0	0.593998	0.0975371	SDF2L1;HIST1H3D
SMC3 ENCODE	4/1181	0.848959	0.999996	0	0	0.662808	0.108531	SCARA5;GRM8;NPTX1;ANKRD2
REST ENCODE	1/383	0.856068	0.999996	0	0	0.516103	0.0802054	SARM1
CEBPD ENCODE	2/734	0.886249	0.999996	0	0	0.534404	0.0645333	PYCR1;HIST1H3D
CTCF ENCODE	6/1790	0.893053	0.999996	0	0	0.648173	0.0733147	SDF2L1;SCARA5;GRM8;SEMA3G;SPP1;ANKRD2
SOX2 CHEA	2/775	0.903891	0.999996	0	0	0.504977	0.0510263	SPP1;ASNS
RELA ENCODE	1/484	0.914214	0.999996	0	0	0.406069	0.0364204	LRG1
UBTF ENCODE	5/1631	0.918509	0.999996	0	0	0.591506	0.0502802	ENHO;PSAT1;SEPT5;CYB561;HIST1H3D
NFYA ENCODE	2250-07-01	0.942428	0.999996	0	0	0.59252	0.0351337	SDF2L1;PSAT1;DERL3;PYCR1;HIST1H3D;TTC16;NUCB2
TCF7L2 ENCODE	1/583	0.948478	0.999996	0	0	0.335277	0.0177349	SARM1
REST CHEA	3/1280	0.95879	0.999996	0	0	0.451033	0.0189808	APLP1;ASNS;NPTX1
TAF7 ENCODE	1/640	0.96163	0.999996	0	0	0.304469	0.0119125	HIST1H3D
TCF3 CHEA	2/1006	0.964194	0.999996	0	0	0.384096	0.0140054	SPP1;ASNS
RCOR1 ENCODE	1/702	0.972181	0.999996	0	0	0.276647	0.00780504	DPF1
SP1 ENCODE	1/707	0.972895	0.999996	0	0	0.274616	0.00754632	SDF2L1
E2F4 ENCODE	1/710	0.973314	0.999996	0	0	0.273411	0.00739541	HIST1H3D
STAT3 ENCODE	1/725	0.975316	0.999996	0	0	0.267537	0.00668679	HIST1H3D
GATA2 CHEA	1/772	0.980675	0.999996	0	0	0.250612	0.00489059	CYB561
GATA1 CHEA	1/807	0.983901	0.999996	0	0	0.239291	0.00388379	CYB561
NFYB ENCODE	3715-11-01	0.986014	0.999996	0	0	0.54043	0.00761203	ENHO;SDF2L1;GMDS;PSAT1;DERL3;DPF1;ASNS;PYCR1;HIST1H3D;TTC16;NUCB2
TCF3 ENCODE	1/840	0.986451	0.999996	0	0	0.229482	0.0031304	TTC9
E2F1 CHEA	1/859	0.987734	0.999996	0	0	0.224176	0.00276674	FAM81A
HNF4A ENCODE	2/1276	0.989419	0.999996	0	0	0.298369	0.00317401	SCARA5;SARM1
RUNX1 CHEA	2/1294	0.990265	0.999996	0	0	0.293928	0.00287554	LCN12;DERL3
ZMIZ1 ENCODE	1/914	0.990807	0.999996	0	0	0.210063	0.00193995	HIST1H3D
SP2 ENCODE	1/994	0.993966	0.999996	0	0	0.192326	0.00116401	NUCB2
USF1 ENCODE	2/1423	0.994678	0.999996	0	0	0.265392	0.00141626	SARM1;NPTX1
NFE2L2 CHEA	1/1022	0.994795	0.999996	0	0	0.186775	0.000974745	TTC9
SPI1 CHEA	1/1056	0.995651	0.999996	0	0	0.18043	0.000786429	PRTN3
SIX5 ENCODE	1/1094	0.996443	0.999996	0	0	0.173806	0.000619258	DPF1
SPI1 ENCODE	2/1540	0.996951	0.999996	0	0	0.243651	0.000743974	ANKRD2;HAPLN4
MAX ENCODE	2073-03-01	0.99863	0.999996	0	0	0.266398	0.000365269	FABP5;PYCR1;CYB561
ZBTB7A ENCODE	2184-03-01	0.999181	0.999996	0	0	0.251266	0.00020599	ISYNA1;PYCR1;NUCB2
CREB1 CHEA	1/1444	0.999451	0.999996	0	0	0.129199	7.09082e-05	ATG9B
MYC ENCODE	1/1515	0.999625	0.999996	0	0	0.122667	4.5953e-05	PYCR1
PML ENCODE	1/1596	0.999758	0.999996	0	0	0.115924	2.80849e-05	ASNS
CREB1 ENCODE	2238-01-01	0.99999	0.999996	0	0	0.079756	8.1013e-07	TTC16
BRCA1 ENCODE	3218-03-01	0.999992	0.999996	0	0	0.160507	1.35448e-06	SDF2L1;GMDS;PSAT1
ATF2 ENCODE	2852-02-01	0.999993	0.999996	0	0	0.122091	8.74209e-07	ASNS;HIST1H3D
ELF1 ENCODE	2483-01-01	0.999995	0.999996	0	0	0.0708861	3.65701e-07	TTC16
YY1 ENCODE	2753-01-01	0.999996	0.999996	0	0	0.0629405	2.47834e-07	TTC16
TAF1 ENCODE	3346-01-01	0.999996	0.999996	0	0	0.0499917	1.90027e-07	HIST1H3D

## Sheet: iWAT SFN ENCODE_and_ChEA_Consen
Term	Overlap	P-value	Adjusted P-value	Old P-value	Old Adjusted P-value	Odds Ratio	Combined Score	Genes
PPARG CHEA	4/535	0.0137535	0.756443	0	0	4.72243	20.2425	TMEM134;UHRF1BP1L;HPGD;PNPLA2
CHD1 ENCODE	3/655	0.105893	0.984215	0	0	2.77698	6.23525	UHRF1BP1L;FANCM;ZFC3H1
CEBPB ENCODE	1/144	0.223631	0.984215	0	0	4.07692	6.10625	NCOA7
TP63 CHEA	4/1399	0.226885	0.984215	0	0	1.71766	2.54782	PHYHD1;SLC1A3;NCOA7;UBR1
ESR1 CHEA	1/154	0.237211	0.984215	0	0	3.80854	5.47974	PDK4
ETS1 ENCODE	1/156	0.239899	0.984215	0	0	3.75901	5.36613	ZFC3H1
NFE2L2 CHEA	3/1022	0.264666	0.984215	0	0	1.74307	2.31704	CCL8;NCOA7;PDIA4
NANOG CHEA	2/595	0.279619	0.984215	0	0	1.97987	2.523	ZFC3H1;TIMP4
FOXA1 ENCODE	1/205	0.302958	0.984215	0	0	2.84905	3.40223	UHRF1BP1L
UBTF ENCODE	4/1631	0.31855	0.984215	0	0	1.45433	1.66372	FANCM;ZFC3H1;NCOA7;PNPLA2
EZH2 CHEA	1/237	0.341363	0.984215	0	0	2.45875	2.64268	BMP3
CEBPD ENCODE	2/734	0.369628	0.984215	0	0	1.5924	1.58485	RSRP1;NCOA7
PPARD CHEA	1/285	0.395145	0.984215	0	0	2.03821	1.89248	HMGCS2
SRF ENCODE	1/299	0.410011	0.984215	0	0	1.94108	1.73061	TMEM134
FOXA2 ENCODE	1/316	0.427586	0.984215	0	0	1.83473	1.55879	UHRF1BP1L
BCLAF1 ENCODE	2/851	0.44227	0.984215	0	0	1.3646	1.11329	FANCM;ZFC3H1
MYC ENCODE	3/1515	0.500849	0.984215	0	0	1.14416	0.791129	SNHG20;NCOA7;PDIA4
SP2 ENCODE	2/994	0.52487	0.984215	0	0	1.15915	0.747194	FANCM;SNHG20
TCF3 CHEA	2/1006	0.531444	0.984215	0	0	1.14457	0.723551	ZFC3H1;SLC1A3
YY1 ENCODE	2753-05-01	0.538132	0.984215	0	0	1.04421	0.647048	TMEM134;UHRF1BP1L;FANCM;ZFC3H1;UBR1
SIN3A ENCODE	2/1131	0.596371	0.984215	0	0	1.01114	0.522651	FANCM;ZFC3H1
RFX5 ENCODE	1/559	0.62955	0.984215	0	0	1.02293	0.473361	PDIA4
TCF7L2 ENCODE	1/583	0.645238	0.984215	0	0	0.979533	0.429169	PDIA4
RAD21 ENCODE	2/1265	0.658597	0.984215	0	0	0.89743	0.374806	TMEM134;SNHG20
HNF4A ENCODE	2/1276	0.663365	0.984215	0	0	0.889158	0.364938	UHRF1BP1L;PHYHD1
FLI1 ENCODE	1/650	0.685695	0.984215	0	0	0.875374	0.330298	ZFC3H1
IRF3 ENCODE	1/663	0.693009	0.984215	0	0	0.857606	0.314495	UBR1
ZBTB33 ENCODE	1/702	0.71397	0.984215	0	0	0.808257	0.272313	ZFC3H1
SP1 ENCODE	1/707	0.716555	0.984215	0	0	0.802325	0.267415	FANCM
E2F4 ENCODE	1/710	0.718095	0.984215	0	0	0.798805	0.264528	FANCM
GABPA ENCODE	2082-03-01	0.720753	0.984215	0	0	0.806548	0.264111	FANCM;SNHG20;ZFC3H1
STAT3 ENCODE	1/725	0.725673	0.984215	0	0	0.781646	0.250639	FANCM
SOX2 CHEA	1/775	0.749532	0.984215	0	0	0.729252	0.210248	TIMP4
TCF3 ENCODE	1/840	0.777552	0.984215	0	0	0.670476	0.168695	FANCM
PML ENCODE	2/1596	0.780604	0.984215	0	0	0.698491	0.173007	TMEM134;RSRP1
ZMIZ1 ENCODE	1/914	0.805753	0.984215	0	0	0.613749	0.132557	UBR1
SUZ12 CHEA	2/1684	0.806111	0.984215	0	0	0.658776	0.141989	BMP3;HPGD
ELF1 ENCODE	2483-03-01	0.827144	0.984215	0	0	0.660975	0.125437	SNHG20;ZFC3H1;UBR1
KLF4 CHEA	1/987	0.830154	0.984215	0	0	0.566132	0.105382	PNPLA2
CTCF ENCODE	2/1790	0.833435	0.984215	0	0	0.616128	0.112258	TMEM134;ZFC3H1
TAF1 ENCODE	3346-04-01	0.859884	0.984215	0	0	0.641802	0.0968849	UHRF1BP1L;FANCM;ZFC3H1;RSRP1
SIX5 ENCODE	1/1094	0.860622	0.984215	0	0	0.507831	0.0762252	ZFC3H1
MAX ENCODE	2073-02-01	0.890619	0.984215	0	0	0.523653	0.0606594	SNHG20;PDIA4
ATF2 ENCODE	2852-03-01	0.893448	0.984215	0	0	0.563224	0.0634568	SNHG20;ZFC3H1;NCOA7
PBX3 ENCODE	1/1269	0.899373	0.984215	0	0	0.433684	0.0459953	FANCM
RUNX1 CHEA	1/1294	0.903973	0.984215	0	0	0.42473	0.0428791	FANCM
NFYB ENCODE	3715-04-01	0.911655	0.984215	0	0	0.565155	0.0522736	FANCM;PDK4;PDIA4;PNPLA2
CREB1 ENCODE	2238-02-01	0.915196	0.984215	0	0	0.480539	0.0425842	ZFC3H1;UBR1
NFYA ENCODE	2250-02-01	0.916772	0.984215	0	0	0.47765	0.0415063	FANCM;PDIA4
CREB1 CHEA	1/1444	0.927572	0.984215	0	0	0.377522	0.0283839	ZFC3H1
BRCA1 ENCODE	3218-03-01	0.93639	0.984215	0	0	0.488433	0.0321016	FANCM;ZFC3H1;PNPLA2
SPI1 ENCODE	1/1540	0.939606	0.984215	0	0	0.352139	0.0219362	ZFC3H1
NRF1 ENCODE	1/1882	0.968632	0.984215	0	0	0.282766	0.00901197	RSRP1
ZBTB7A ENCODE	2184-01-01	0.982591	0.984215	0	0	0.239579	0.00420753	TMEM134
E2F6 ENCODE	3245-02-01	0.984215	0.984215	0	0	0.312505	0.00497211	SNHG20;PDIA4
