# Supplementary material for: Sulforaphane reduces obesity by reversing leptin resistance
Source: eLife. 2022 Mar 24;11:e67368. doi: 10.7554/eLife.67368 (PMC8947770; doi:10.7554/eLife.67368)
Supplement: Supplementary file 4. — KEGG pathway analysis of skeletal muscle transcriptome identifies ribosome biogenesis, proteasome pathway, the RNA transport, and mitophagy as the significantly upregulated pathways in SFN-treated wild-type mice. The KEGG pathway analysis of muscle samples from NRF2 KO animals identified only the splicesome pathway as significantly upregulated following SFN treatments. [file elife-67368-supp4.xlsx]

## Sheet: SkMuscle KEGG WT Up
KEGGID	Description	GeneRatio	BgRatio	pvalue	padj	geneID	geneName	keggID	Count
mmu03008	Ribosome biogenesis in eukaryotes	19|354	73|6069	1.92774e-08	5.22418e-06	ENSMUSG00000050244/ENSMUSG00000032834/ENSMUSG00000030521/ENSMUSG00000042354/ENSMUSG00000025995/ENSMUSG00000003848/ENSMUSG00000063785/ENSMUSG00000021149/ENSMUSG00000028430/ENSMUSG00000033285/ENSMUSG00000028010/ENSMUSG00000022325/ENSMUSG00000027185/ENSMUSG00000025337/ENSMUSG00000041057/ENSMUSG00000024613/ENSMUSG00000041747/ENSMUSG00000021428/ENSMUSG00000029701	Heatr1/Pwp2/Mphosph10/Gnl3/Wdr75/Nob1/Utp14a/Gtpbp4/Nol6/Wdr3/Gar1/Pop1/Nat10/Sbds/Wdr43/Tcof1/Utp15/Riok1/Rbm28	mmu:217995/mmu:110816/mmu:67973/mmu:30877/mmu:73674/mmu:67619/mmu:72554/mmu:69237/mmu:230082/mmu:269470/mmu:68147/mmu:67724/mmu:98956/mmu:66711/mmu:72515/mmu:21453/mmu:105372/mmu:71340/mmu:68272	19
mmu03050	Proteasome	14|354	44|6069	9.46544e-08	1.28257e-05	ENSMUSG00000021178/ENSMUSG00000017428/ENSMUSG00000028932/ENSMUSG00000006998/ENSMUSG00000027566/ENSMUSG00000039067/ENSMUSG00000020708/ENSMUSG00000005625/ENSMUSG00000014769/ENSMUSG00000032869/ENSMUSG00000017221/ENSMUSG00000068749/ENSMUSG00000039041/ENSMUSG00000021832	Psmc1/Psmd11/Psmc2/Psmd2/Psma7/Psmd7/Psmc5/Psmd4/Psmb1/Psmf1/Psmd3/Psma5/Adrm1/Psmc6	mmu:19179/mmu:69077/mmu:19181/mmu:21762/mmu:26444/mmu:17463/mmu:19184/mmu:19185/mmu:19170/mmu:228769/mmu:22123/mmu:26442/mmu:56436/mmu:67089	14
mmu03013	RNA transport	25|354	152|6069	1.83365e-06	0.00016564	ENSMUSG00000031490/ENSMUSG00000037275/ENSMUSG00000013736/ENSMUSG00000028609/ENSMUSG00000067150/ENSMUSG00000034826/ENSMUSG00000035530/ENSMUSG00000058655/ENSMUSG00000109511/ENSMUSG00000022325/ENSMUSG00000021282/ENSMUSG00000022884/ENSMUSG00000016554/ENSMUSG00000030738/ENSMUSG00000056076/ENSMUSG00000023110/ENSMUSG00000003235/ENSMUSG00000028233/ENSMUSG00000030447/ENSMUSG00000028683/ENSMUSG00000070319/…	Eif4ebp1/Gemin5/Trnt1/Magoh/Xpo5/Nup54/Eif1/Eif4b/Nup62/Pop1/Eif5/Eif4a2/Eif3d/Eif3c/Eif3b/Prmt5/Eif2b5/Tgs1/Cyfip1/Eif2b3/Eif3g/Eif4a1/Eif5b/Ddx20/Magohb	mmu:13685/mmu:216766/mmu:70047/mmu:17149/mmu:72322/mmu:269113/mmu:20918/mmu:75705/mmu:18226/mmu:67724/mmu:217869/mmu:13682/mmu:55944/mmu:56347/mmu:27979/mmu:27374/mmu:224045/mmu:116940/mmu:20430/mmu:108067/mmu:53356/mmu:13681/mmu:226982/mmu:53975/mmu:66441	25

## Sheet: SkMuscle KEGG WT Down
KEGGID	Description	GeneRatio	BgRatio	pvalue	padj	geneID	geneName	keggID	Count
mmu04510	Focal adhesion	32|346	195|6069	3.80801e-08	1.07767e-05	ENSMUSG00000001119/ENSMUSG00000029661/ENSMUSG00000020241/ENSMUSG00000048126/ENSMUSG00000001506/ENSMUSG00000026193/ENSMUSG00000039936/ENSMUSG00000026147/ENSMUSG00000033327/ENSMUSG00000023951/ENSMUSG00000078816/ENSMUSG00000044951/ENSMUSG00000026971/ENSMUSG00000021936/ENSMUSG00000029231/ENSMUSG00000019899/ENSMUSG00000020357/ENSMUSG00000028047/ENSMUSG00000034902/ENSMUSG00000062825/ENSMUSG00000001281/…	Col6a1/Col1a2/Col6a2/Col6a3/Col1a1/Fn1/Pik3cd/Col9a1/Tnxb/Vegfa/Prkcg/Mylk4/Itgb6/Mapk8/Pdgfra/Lama2/Flt4/Thbs3/Pip5k1c/Actg1/Itgb7/Sos1/Itga4/Myl9/Vegfc/Hras/Cdc42/Egfr/Lamc2/Lamc3/Cav3/Vav2	mmu:12833/mmu:12843/mmu:12834/mmu:12835/mmu:12842/mmu:14268/mmu:18707/mmu:12839/mmu:81877/mmu:22339/mmu:18752/mmu:238564/mmu:16420/mmu:26419/mmu:18595/mmu:16773/mmu:14257/mmu:21827/mmu:18717/mmu:11465/mmu:16421/mmu:20662/mmu:16401/mmu:98932/mmu:22341/mmu:15461/mmu:12540/mmu:13649/mmu:16782/mmu:23928/mmu:12391/mmu:22325	32
mmu04974	Protein digestion and absorption	18|346	73|6069	8.02142e-08	1.13503e-05	ENSMUSG00000026043/ENSMUSG00000001119/ENSMUSG00000028339/ENSMUSG00000029661/ENSMUSG00000020241/ENSMUSG00000048126/ENSMUSG00000001506/ENSMUSG00000026147/ENSMUSG00000026042/ENSMUSG00000022371/ENSMUSG00000028197/ENSMUSG00000007107/ENSMUSG00000027966/ENSMUSG00000004098/ENSMUSG00000079022/ENSMUSG00000079055/ENSMUSG00000054640/ENSMUSG00000059412	Col3a1/Col6a1/Col15a1/Col1a2/Col6a2/Col6a3/Col1a1/Col9a1/Col5a2/Col14a1/Col24a1/Atp1a4/Col11a1/Col5a3/Col22a1/Slc8a3/Slc8a1/Fxyd2	mmu:12825/mmu:12833/mmu:12819/mmu:12843/mmu:12834/mmu:12835/mmu:12842/mmu:12839/mmu:12832/mmu:12818/mmu:71355/mmu:27222/mmu:12814/mmu:53867/mmu:69700/mmu:110893/mmu:20541/mmu:11936	18
mmu05414	Dilated cardiomyopathy (DCM)	16|346	83|6069	1.36443e-05	0.00128577	ENSMUSG00000022994/ENSMUSG00000039239/ENSMUSG00000035296/ENSMUSG00000010066/ENSMUSG00000002603/ENSMUSG00000026971/ENSMUSG00000026407/ENSMUSG00000031659/ENSMUSG00000019899/ENSMUSG00000027523/ENSMUSG00000062825/ENSMUSG00000001281/ENSMUSG00000027009/ENSMUSG00000005580/ENSMUSG00000054640/ENSMUSG00000024401	Adcy6/Tgfb2/Sgcg/Cacna2d2/Tgfb1/Itgb6/Cacna1s/Adcy7/Lama2/Gnas/Actg1/Itgb7/Itga4/Adcy9/Slc8a1/Tnf	mmu:11512/mmu:21808/mmu:24053/mmu:56808/mmu:21803/mmu:16420/mmu:12292/mmu:11513/mmu:16773/mmu:14683/mmu:11465/mmu:16421/mmu:16401/mmu:11515/mmu:20541/mmu:21926	16
mmu05323	Rheumatoid arthritis	14|346	67|6069	1.81735e-05	0.00128577	ENSMUSG00000039239/ENSMUSG00000036594/ENSMUSG00000014599/ENSMUSG00000023951/ENSMUSG00000038600/ENSMUSG00000002603/ENSMUSG00000028111/ENSMUSG00000073421/ENSMUSG00000060586/ENSMUSG00000031712/ENSMUSG00000022901/ENSMUSG00000024401/ENSMUSG00000075122/ENSMUSG00000026321	Tgfb2/H2-Aa/Csf1/Vegfa/Atp6v0a4/Tgfb1/Ctsk/H2-Ab1/H2-Eb1/Il15/Cd86/Tnf/Cd80/Tnfrsf11a	mmu:21808/mmu:14960/mmu:12977/mmu:22339/mmu:140494/mmu:21803/mmu:13038/mmu:14961/mmu:14969/mmu:16168/mmu:12524/mmu:21926/mmu:12519/mmu:21934	14
mmu04512	ECM-receptor interaction	15|346	80|6069	3.5818e-05	0.0020273	ENSMUSG00000001119/ENSMUSG00000029661/ENSMUSG00000020241/ENSMUSG00000048126/ENSMUSG00000001506/ENSMUSG00000026193/ENSMUSG00000026147/ENSMUSG00000033327/ENSMUSG00000026971/ENSMUSG00000019899/ENSMUSG00000028047/ENSMUSG00000001281/ENSMUSG00000027009/ENSMUSG00000026479/ENSMUSG00000026840	Col6a1/Col1a2/Col6a2/Col6a3/Col1a1/Fn1/Col9a1/Tnxb/Itgb6/Lama2/Thbs3/Itgb7/Itga4/Lamc2/Lamc3	mmu:12833/mmu:12843/mmu:12834/mmu:12835/mmu:12842/mmu:14268/mmu:12839/mmu:81877/mmu:16420/mmu:16773/mmu:21827/mmu:16421/mmu:16401/mmu:16782/mmu:23928	15
mmu04926	Relaxin signaling pathway	19|346	121|6069	4.60139e-05	0.00217032	ENSMUSG00000026043/ENSMUSG00000029661/ENSMUSG00000022994/ENSMUSG00000001506/ENSMUSG00000039936/ENSMUSG00000023951/ENSMUSG00000031740/ENSMUSG00000031748/ENSMUSG00000018909/ENSMUSG00000002603/ENSMUSG00000032192/ENSMUSG00000021936/ENSMUSG00000031659/ENSMUSG00000027523/ENSMUSG00000024241/ENSMUSG00000005580/ENSMUSG00000031520/ENSMUSG00000025499/ENSMUSG00000020122	Col3a1/Col1a2/Adcy6/Col1a1/Pik3cd/Vegfa/Mmp2/Gnao1/Arrb1/Tgfb1/Gnb5/Mapk8/Adcy7/Gnas/Sos1/Adcy9/Vegfc/Hras/Egfr	mmu:12825/mmu:12843/mmu:11512/mmu:12842/mmu:18707/mmu:22339/mmu:17390/mmu:14681/mmu:109689/mmu:21803/mmu:14697/mmu:26419/mmu:11513/mmu:14683/mmu:20662/mmu:11515/mmu:22341/mmu:15461/mmu:13649	19
mmu04912	GnRH signaling pathway	15|346	85|6069	7.47663e-05	0.00302269	ENSMUSG00000022994/ENSMUSG00000031740/ENSMUSG00000021936/ENSMUSG00000026407/ENSMUSG00000031659/ENSMUSG00000030102/ENSMUSG00000027523/ENSMUSG00000053819/ENSMUSG00000020623/ENSMUSG00000024241/ENSMUSG00000005580/ENSMUSG00000025499/ENSMUSG00000006699/ENSMUSG00000020122/ENSMUSG00000056220	Adcy6/Mmp2/Mapk8/Cacna1s/Adcy7/Itpr1/Gnas/Camk2d/Map2k6/Sos1/Adcy9/Hras/Cdc42/Egfr/Pla2g4a	mmu:11512/mmu:17390/mmu:26419/mmu:12292/mmu:11513/mmu:16438/mmu:14683/mmu:108058/mmu:26399/mmu:20662/mmu:11515/mmu:15461/mmu:12540/mmu:13649/mmu:18783	15
mmu04672	Intestinal immune network for IgA production	9|346	35|6069	0.000107859	0.00368008	ENSMUSG00000036594/ENSMUSG00000002603/ENSMUSG00000073421/ENSMUSG00000060586/ENSMUSG00000031712/ENSMUSG00000022901/ENSMUSG00000001281/ENSMUSG00000027009/ENSMUSG00000075122	H2-Aa/Tgfb1/H2-Ab1/H2-Eb1/Il15/Cd86/Itgb7/Itga4/Cd80	mmu:14960/mmu:21803/mmu:14961/mmu:14969/mmu:16168/mmu:12524/mmu:16421/mmu:16401/mmu:12519	9
mmu04151	PI3K-Akt signaling pathway	35|346	319|6069	0.000117034	0.00368008	ENSMUSG00000001119/ENSMUSG00000029661/ENSMUSG00000020241/ENSMUSG00000048126/ENSMUSG00000001506/ENSMUSG00000026193/ENSMUSG00000039936/ENSMUSG00000026147/ENSMUSG00000033327/ENSMUSG00000024621/ENSMUSG00000020573/ENSMUSG00000014599/ENSMUSG00000023951/ENSMUSG00000019471/ENSMUSG00000026626/ENSMUSG00000032192/ENSMUSG00000043154/ENSMUSG00000026971/ENSMUSG00000038668/ENSMUSG00000031230/ENSMUSG00000029231/…	Col6a1/Col1a2/Col6a2/Col6a3/Col1a1/Fn1/Pik3cd/Col9a1/Tnxb/Csf1r/Pik3cg/Csf1/Vegfa/Cdc37/Ppp2r5a/Gnb5/Ppp2r3a/Itgb6/Lpar1/Fgf16/Pdgfra/Lama2/Flt4/Ghr/Thbs3/Ntf5/Itgb7/Sos1/Itga4/Vegfc/Hras/Egfr/Lamc2/Lamc3/Ppp2r3d	mmu:12833/mmu:12843/mmu:12834/mmu:12835/mmu:12842/mmu:14268/mmu:18707/mmu:12839/mmu:81877/mmu:12978/mmu:30955/mmu:12977/mmu:22339/mmu:12539/mmu:226849/mmu:14697/mmu:235542/mmu:16420/mmu:14745/mmu:80903/mmu:18595/mmu:16773/mmu:14257/mmu:14600/mmu:21827/mmu:78405/mmu:16421/mmu:20662/mmu:16401/mmu:22341/mmu:15461/mmu:13649/mmu:16782/mmu:23928/mmu:19054	35
mmu05032	Morphine addiction	14|346	81|6069	0.000163321	0.00462199	ENSMUSG00000022994/ENSMUSG00000032177/ENSMUSG00000019990/ENSMUSG00000024462/ENSMUSG00000004347/ENSMUSG00000078816/ENSMUSG00000031748/ENSMUSG00000018909/ENSMUSG00000034656/ENSMUSG00000032192/ENSMUSG00000021478/ENSMUSG00000031659/ENSMUSG00000027523/ENSMUSG00000005580	Adcy6/Pde4a/Pde7b/Gabbr1/Pde1c/Prkcg/Gnao1/Arrb1/Cacna1a/Gnb5/Drd1/Adcy7/Gnas/Adcy9	mmu:11512/mmu:18577/mmu:29863/mmu:54393/mmu:18575/mmu:18752/mmu:14681/mmu:109689/mmu:12286/mmu:14697/mmu:13488/mmu:11513/mmu:14683/mmu:11515	14
mmu05205	Proteoglycans in cancer	24|346	194|6069	0.000244278	0.00611421	ENSMUSG00000036446/ENSMUSG00000022261/ENSMUSG00000029661/ENSMUSG00000039239/ENSMUSG00000032826/ENSMUSG00000021822/ENSMUSG00000001506/ENSMUSG00000026193/ENSMUSG00000039936/ENSMUSG00000015957/ENSMUSG00000023951/ENSMUSG00000078816/ENSMUSG00000031740/ENSMUSG00000002603/ENSMUSG00000030102/ENSMUSG00000062825/ENSMUSG00000053819/ENSMUSG00000024241/ENSMUSG00000025499/ENSMUSG00000024401/ENSMUSG00000006699/…	Lum/Sdc2/Col1a2/Tgfb2/Ank2/Plau/Col1a1/Fn1/Pik3cd/Wnt11/Vegfa/Prkcg/Mmp2/Tgfb1/Itpr1/Actg1/Camk2d/Sos1/Hras/Tnf/Cdc42/Egfr/Cav3/Vav2	mmu:17022/mmu:15529/mmu:12843/mmu:21808/mmu:109676/mmu:18792/mmu:12842/mmu:14268/mmu:18707/mmu:22411/mmu:22339/mmu:18752/mmu:17390/mmu:21803/mmu:16438/mmu:11465/mmu:108058/mmu:20662/mmu:15461/mmu:21926/mmu:12540/mmu:13649/mmu:12391/mmu:22325	24
mmu05146	Amoebiasis	14|346	85|6069	0.000276461	0.00611421	ENSMUSG00000026043/ENSMUSG00000029661/ENSMUSG00000039239/ENSMUSG00000001506/ENSMUSG00000026193/ENSMUSG00000039936/ENSMUSG00000052688/ENSMUSG00000078816/ENSMUSG00000002603/ENSMUSG00000019899/ENSMUSG00000027523/ENSMUSG00000024401/ENSMUSG00000026479/ENSMUSG00000026840	Col3a1/Col1a2/Tgfb2/Col1a1/Fn1/Pik3cd/Rab7b/Prkcg/Tgfb1/Lama2/Gnas/Tnf/Lamc2/Lamc3	mmu:12825/mmu:12843/mmu:21808/mmu:12842/mmu:14268/mmu:18707/mmu:226421/mmu:18752/mmu:21803/mmu:16773/mmu:14683/mmu:21926/mmu:16782/mmu:23928	14
mmu04010	MAPK signaling pathway	31|346	282|6069	0.000280865	0.00611421	ENSMUSG00000039239/ENSMUSG00000005583/ENSMUSG00000023809/ENSMUSG00000024621/ENSMUSG00000014599/ENSMUSG00000023951/ENSMUSG00000053716/ENSMUSG00000078816/ENSMUSG00000010066/ENSMUSG00000024190/ENSMUSG00000071369/ENSMUSG00000071042/ENSMUSG00000018909/ENSMUSG00000034656/ENSMUSG00000002603/ENSMUSG00000025225/ENSMUSG00000021936/ENSMUSG00000026407/ENSMUSG00000031230/ENSMUSG00000029231/ENSMUSG00000020357/…	Tgfb2/Mef2c/Rps6ka2/Csf1r/Csf1/Vegfa/Dusp7/Prkcg/Cacna2d2/Dusp1/Map3k5/Rasgrp3/Arrb1/Cacna1a/Tgfb1/Nfkb2/Mapk8/Cacna1s/Fgf16/Pdgfra/Flt4/Ntf5/Map2k6/Dusp8/Sos1/Vegfc/Hras/Tnf/Cdc42/Egfr/Pla2g4a	mmu:21808/mmu:17260/mmu:20112/mmu:12978/mmu:12977/mmu:22339/mmu:235584/mmu:18752/mmu:56808/mmu:19252/mmu:26408/mmu:240168/mmu:109689/mmu:12286/mmu:21803/mmu:18034/mmu:26419/mmu:12292/mmu:80903/mmu:18595/mmu:14257/mmu:78405/mmu:26399/mmu:18218/mmu:20662/mmu:22341/mmu:15461/mmu:21926/mmu:12540/mmu:13649/mmu:18783	31
mmu04020	Calcium signaling pathway	21|346	163|6069	0.000341829	0.00690983	ENSMUSG00000030987/ENSMUSG00000004347/ENSMUSG00000078816/ENSMUSG00000044951/ENSMUSG00000034656/ENSMUSG00000009647/ENSMUSG00000019943/ENSMUSG00000026407/ENSMUSG00000029231/ENSMUSG00000021478/ENSMUSG00000031659/ENSMUSG00000049686/ENSMUSG00000030102/ENSMUSG00000027523/ENSMUSG00000079055/ENSMUSG00000053819/ENSMUSG00000010660/ENSMUSG00000005580/ENSMUSG00000054640/ENSMUSG00000020788/ENSMUSG00000020122	Stim1/Pde1c/Prkcg/Mylk4/Cacna1a/Mcu/Atp2b1/Cacna1s/Pdgfra/Drd1/Adcy7/Orai1/Itpr1/Gnas/Slc8a3/Camk2d/Plcd1/Adcy9/Slc8a1/Atp2a3/Egfr	mmu:20866/mmu:18575/mmu:18752/mmu:238564/mmu:12286/mmu:215999/mmu:67972/mmu:12292/mmu:18595/mmu:13488/mmu:11513/mmu:109305/mmu:16438/mmu:14683/mmu:110893/mmu:108058/mmu:18799/mmu:11515/mmu:20541/mmu:53313/mmu:13649	21
mmu04921	Oxytocin signaling pathway	19|346	143|6069	0.000440488	0.00831054	ENSMUSG00000022994/ENSMUSG00000005583/ENSMUSG00000020573/ENSMUSG00000078816/ENSMUSG00000010066/ENSMUSG00000044951/ENSMUSG00000031748/ENSMUSG00000026407/ENSMUSG00000031659/ENSMUSG00000030102/ENSMUSG00000027523/ENSMUSG00000062825/ENSMUSG00000053819/ENSMUSG00000027544/ENSMUSG00000067818/ENSMUSG00000005580/ENSMUSG00000025499/ENSMUSG00000020122/ENSMUSG00000056220	Adcy6/Mef2c/Pik3cg/Prkcg/Cacna2d2/Mylk4/Gnao1/Cacna1s/Adcy7/Itpr1/Gnas/Actg1/Camk2d/Nfatc2/Myl9/Adcy9/Hras/Egfr/Pla2g4a	mmu:11512/mmu:17260/mmu:30955/mmu:18752/mmu:56808/mmu:238564/mmu:14681/mmu:12292/mmu:11513/mmu:16438/mmu:14683/mmu:11465/mmu:108058/mmu:18019/mmu:98932/mmu:11515/mmu:15461/mmu:13649/mmu:18783	19
mmu04933	AGE-RAGE signaling pathway in diabetic complications	15|346	100|6069	0.000481925	0.00852405	ENSMUSG00000026043/ENSMUSG00000029661/ENSMUSG00000039239/ENSMUSG00000001506/ENSMUSG00000026193/ENSMUSG00000039936/ENSMUSG00000023951/ENSMUSG00000031740/ENSMUSG00000002603/ENSMUSG00000021936/ENSMUSG00000010660/ENSMUSG00000031520/ENSMUSG00000025499/ENSMUSG00000024401/ENSMUSG00000006699	Col3a1/Col1a2/Tgfb2/Col1a1/Fn1/Pik3cd/Vegfa/Mmp2/Tgfb1/Mapk8/Plcd1/Vegfc/Hras/Tnf/Cdc42	mmu:12825/mmu:12843/mmu:21808/mmu:12842/mmu:14268/mmu:18707/mmu:22339/mmu:17390/mmu:21803/mmu:26419/mmu:18799/mmu:22341/mmu:15461/mmu:21926/mmu:12540	15
mmu04961	Endocrine and other factor-regulated calcium reabsorption	9|346	44|6069	0.000686644	0.0110443	ENSMUSG00000022994/ENSMUSG00000026825/ENSMUSG00000078816/ENSMUSG00000007107/ENSMUSG00000019943/ENSMUSG00000027523/ENSMUSG00000005580/ENSMUSG00000054640/ENSMUSG00000059412	Adcy6/Dnm1/Prkcg/Atp1a4/Atp2b1/Gnas/Adcy9/Slc8a1/Fxyd2	mmu:11512/mmu:13429/mmu:18752/mmu:27222/mmu:67972/mmu:14683/mmu:11515/mmu:20541/mmu:11936	9
mmu04015	Rap1 signaling pathway	23|346	196|6069	0.000702462	0.0110443	ENSMUSG00000022994/ENSMUSG00000039936/ENSMUSG00000024621/ENSMUSG00000035954/ENSMUSG00000014599/ENSMUSG00000023951/ENSMUSG00000078816/ENSMUSG00000031748/ENSMUSG00000071042/ENSMUSG00000038668/ENSMUSG00000031230/ENSMUSG00000029231/ENSMUSG00000031659/ENSMUSG00000020357/ENSMUSG00000027523/ENSMUSG00000062825/ENSMUSG00000020623/ENSMUSG00000005580/ENSMUSG00000031520/ENSMUSG00000025499/ENSMUSG00000006699/…	Adcy6/Pik3cd/Csf1r/Dock4/Csf1/Vegfa/Prkcg/Gnao1/Rasgrp3/Lpar1/Fgf16/Pdgfra/Adcy7/Flt4/Gnas/Actg1/Map2k6/Adcy9/Vegfc/Hras/Cdc42/Egfr/Ralgds	mmu:11512/mmu:18707/mmu:12978/mmu:238130/mmu:12977/mmu:22339/mmu:18752/mmu:14681/mmu:240168/mmu:14745/mmu:80903/mmu:18595/mmu:11513/mmu:14257/mmu:14683/mmu:11465/mmu:26399/mmu:11515/mmu:22341/mmu:15461/mmu:12540/mmu:13649/mmu:19730	23
mmu04714	Thermogenesis	25|346	222|6069	0.00076921	0.0114572	ENSMUSG00000022994/ENSMUSG00000023809/ENSMUSG00000071369/ENSMUSG00000029167/ENSMUSG00000020544/ENSMUSG00000033938/ENSMUSG00000000088/ENSMUSG00000027673/ENSMUSG00000031659/ENSMUSG00000021265/ENSMUSG00000025204/ENSMUSG00000026112/ENSMUSG00000027523/ENSMUSG00000062825/ENSMUSG00000022890/ENSMUSG00000024082/ENSMUSG00000024241/ENSMUSG00000031278/ENSMUSG00000005580/ENSMUSG00000025499/ENSMUSG00000030647/…	Adcy6/Rps6ka2/Map3k5/Ppargc1a/Cox11/Ndufb7/Cox5a/Ndufb5/Adcy7/Slc25a29/Ndufb8/Coa5/Gnas/Actg1/Atp5j/Ndufaf7/Sos1/Acsl4/Adcy9/Hras/Ndufc2/Cox10/Atp5a1/Ndufs3/Cyc1	mmu:11512/mmu:20112/mmu:26408/mmu:19017/mmu:69802/mmu:66916/mmu:12858/mmu:66046/mmu:11513/mmu:214663/mmu:67264/mmu:76178/mmu:14683/mmu:11465/mmu:11957/mmu:73694/mmu:20662/mmu:50790/mmu:11515/mmu:15461/mmu:68197/mmu:70383/mmu:11946/mmu:68349/mmu:66445	25
mmu04024	cAMP signaling pathway	21|346	174|6069	0.000825667	0.0116832	ENSMUSG00000022994/ENSMUSG00000039936/ENSMUSG00000032177/ENSMUSG00000024462/ENSMUSG00000026114/ENSMUSG00000007107/ENSMUSG00000019943/ENSMUSG00000021936/ENSMUSG00000026407/ENSMUSG00000021478/ENSMUSG00000031659/ENSMUSG00000021318/ENSMUSG00000049686/ENSMUSG00000027523/ENSMUSG00000036570/ENSMUSG00000053819/ENSMUSG00000067818/ENSMUSG00000005580/ENSMUSG00000001986/ENSMUSG00000059412/ENSMUSG00000009621	Adcy6/Pik3cd/Pde4a/Gabbr1/Cnga3/Atp1a4/Atp2b1/Mapk8/Cacna1s/Drd1/Adcy7/Gli3/Orai1/Gnas/Fxyd1/Camk2d/Myl9/Adcy9/Gria3/Fxyd2/Vav2	mmu:11512/mmu:18707/mmu:18577/mmu:54393/mmu:12790/mmu:27222/mmu:67972/mmu:26419/mmu:12292/mmu:13488/mmu:11513/mmu:14634/mmu:109305/mmu:14683/mmu:56188/mmu:108058/mmu:98932/mmu:11515/mmu:53623/mmu:11936/mmu:22325	21
mmu05310	Asthma	5|346	15|6069	0.00109213	0.0147177	ENSMUSG00000036594/ENSMUSG00000020676/ENSMUSG00000073421/ENSMUSG00000060586/ENSMUSG00000024401	H2-Aa/Ccl11/H2-Ab1/H2-Eb1/Tnf	mmu:14960/mmu:20292/mmu:14961/mmu:14969/mmu:21926	5
mmu05165	Human papillomavirus infection	32|346	321|6069	0.00124833	0.016058	ENSMUSG00000001119/ENSMUSG00000029661/ENSMUSG00000020241/ENSMUSG00000048126/ENSMUSG00000001506/ENSMUSG00000026193/ENSMUSG00000039936/ENSMUSG00000021277/ENSMUSG00000026147/ENSMUSG00000033327/ENSMUSG00000015957/ENSMUSG00000023951/ENSMUSG00000022528/ENSMUSG00000038600/ENSMUSG00000026626/ENSMUSG00000000142/ENSMUSG00000043154/ENSMUSG00000026971/ENSMUSG00000063870/ENSMUSG00000019899/ENSMUSG00000028047/…	Col6a1/Col1a2/Col6a2/Col6a3/Col1a1/Fn1/Pik3cd/Traf3/Col9a1/Tnxb/Wnt11/Vegfa/Hes1/Atp6v0a4/Ppp2r5a/Axin2/Ppp2r3a/Itgb6/Chd4/Lama2/Thbs3/Gnas/Itgb7/Sos1/Itga4/Hras/Tnf/Cdc42/Egfr/Lamc2/Lamc3/Ppp2r3d	mmu:12833/mmu:12843/mmu:12834/mmu:12835/mmu:12842/mmu:14268/mmu:18707/mmu:22031/mmu:12839/mmu:81877/mmu:22411/mmu:22339/mmu:15205/mmu:140494/mmu:226849/mmu:12006/mmu:235542/mmu:16420/mmu:107932/mmu:16773/mmu:21827/mmu:14683/mmu:16421/mmu:20662/mmu:16401/mmu:15461/mmu:21926/mmu:12540/mmu:13649/mmu:16782/mmu:23928/mmu:19054	32
mmu05410	Hypertrophic cardiomyopathy (HCM)	12|346	78|6069	0.00139314	0.0171416	ENSMUSG00000039239/ENSMUSG00000035296/ENSMUSG00000010066/ENSMUSG00000002603/ENSMUSG00000026971/ENSMUSG00000026407/ENSMUSG00000019899/ENSMUSG00000062825/ENSMUSG00000001281/ENSMUSG00000027009/ENSMUSG00000054640/ENSMUSG00000024401	Tgfb2/Sgcg/Cacna2d2/Tgfb1/Itgb6/Cacna1s/Lama2/Actg1/Itgb7/Itga4/Slc8a1/Tnf	mmu:21808/mmu:24053/mmu:56808/mmu:21803/mmu:16420/mmu:12292/mmu:16773/mmu:11465/mmu:16421/mmu:16401/mmu:20541/mmu:21926	12
mmu04640	Hematopoietic cell lineage	12|346	79|6069	0.00156047	0.0181101	ENSMUSG00000022797/ENSMUSG00000024621/ENSMUSG00000036594/ENSMUSG00000014599/ENSMUSG00000051504/ENSMUSG00000073421/ENSMUSG00000060586/ENSMUSG00000027009/ENSMUSG00000024401/ENSMUSG00000059326/ENSMUSG00000004609/ENSMUSG00000030577	Tfrc/Csf1r/H2-Aa/Csf1/Siglech/H2-Ab1/H2-Eb1/Itga4/Tnf/Csf2ra/Cd33/Cd22	mmu:22042/mmu:12978/mmu:14960/mmu:12977/mmu:233274/mmu:14961/mmu:14969/mmu:16401/mmu:21926/mmu:12982/mmu:12489/mmu:12483	12
mmu04072	Phospholipase D signaling pathway	17|346	135|6069	0.00159983	0.0181101	ENSMUSG00000022994/ENSMUSG00000039936/ENSMUSG00000026825/ENSMUSG00000017132/ENSMUSG00000020573/ENSMUSG00000038668/ENSMUSG00000029231/ENSMUSG00000031659/ENSMUSG00000034902/ENSMUSG00000027523/ENSMUSG00000024241/ENSMUSG00000005580/ENSMUSG00000025499/ENSMUSG00000004815/ENSMUSG00000020122/ENSMUSG00000026821/ENSMUSG00000056220	Adcy6/Pik3cd/Dnm1/Cyth1/Pik3cg/Lpar1/Pdgfra/Adcy7/Pip5k1c/Gnas/Sos1/Adcy9/Hras/Dgkq/Egfr/Ralgds/Pla2g4a	mmu:11512/mmu:18707/mmu:13429/mmu:19157/mmu:30955/mmu:14745/mmu:18595/mmu:11513/mmu:18717/mmu:14683/mmu:20662/mmu:11515/mmu:15461/mmu:110524/mmu:13649/mmu:19730/mmu:18783	17
mmu04540	Gap junction	12|346	80|6069	0.00174403	0.0187877	ENSMUSG00000022994/ENSMUSG00000078816/ENSMUSG00000038668/ENSMUSG00000029231/ENSMUSG00000021478/ENSMUSG00000031659/ENSMUSG00000030102/ENSMUSG00000027523/ENSMUSG00000024241/ENSMUSG00000005580/ENSMUSG00000025499/ENSMUSG00000020122	Adcy6/Prkcg/Lpar1/Pdgfra/Drd1/Adcy7/Itpr1/Gnas/Sos1/Adcy9/Hras/Egfr	mmu:11512/mmu:18752/mmu:14745/mmu:18595/mmu:13488/mmu:11513/mmu:16438/mmu:14683/mmu:20662/mmu:11515/mmu:15461/mmu:13649	12
mmu04725	Cholinergic synapse	14|346	102|6069	0.00179246	0.0187877	ENSMUSG00000022994/ENSMUSG00000039936/ENSMUSG00000028033/ENSMUSG00000020573/ENSMUSG00000078816/ENSMUSG00000031748/ENSMUSG00000034656/ENSMUSG00000032192/ENSMUSG00000026407/ENSMUSG00000031659/ENSMUSG00000030102/ENSMUSG00000053819/ENSMUSG00000005580/ENSMUSG00000025499	Adcy6/Pik3cd/Kcnq5/Pik3cg/Prkcg/Gnao1/Cacna1a/Gnb5/Cacna1s/Adcy7/Itpr1/Camk2d/Adcy9/Hras	mmu:11512/mmu:18707/mmu:226922/mmu:30955/mmu:18752/mmu:14681/mmu:12286/mmu:14697/mmu:12292/mmu:11513/mmu:16438/mmu:108058/mmu:11515/mmu:15461	14
mmu04261	Adrenergic signaling in cardiomyocytes	17|346	139|6069	0.00220194	0.0222554	ENSMUSG00000022994/ENSMUSG00000061086/ENSMUSG00000020573/ENSMUSG00000010066/ENSMUSG00000026626/ENSMUSG00000007107/ENSMUSG00000043154/ENSMUSG00000019943/ENSMUSG00000026407/ENSMUSG00000031659/ENSMUSG00000027523/ENSMUSG00000053819/ENSMUSG00000005580/ENSMUSG00000054640/ENSMUSG00000046480/ENSMUSG00000059412/ENSMUSG00000093803	Adcy6/Myl4/Pik3cg/Cacna2d2/Ppp2r5a/Atp1a4/Ppp2r3a/Atp2b1/Cacna1s/Adcy7/Gnas/Camk2d/Adcy9/Slc8a1/Scn4b/Fxyd2/Ppp2r3d	mmu:11512/mmu:17896/mmu:30955/mmu:56808/mmu:226849/mmu:27222/mmu:235542/mmu:67972/mmu:12292/mmu:11513/mmu:14683/mmu:108058/mmu:11515/mmu:20541/mmu:399548/mmu:11936/mmu:19054	17
mmu04750	Inflammatory mediator regulation of TRP channels	13|346	96|6069	0.00292024	0.0276989	ENSMUSG00000022994/ENSMUSG00000032860/ENSMUSG00000039936/ENSMUSG00000026778/ENSMUSG00000078816/ENSMUSG00000021936/ENSMUSG00000031659/ENSMUSG00000030102/ENSMUSG00000027523/ENSMUSG00000053819/ENSMUSG00000020623/ENSMUSG00000005580/ENSMUSG00000056220	Adcy6/P2ry2/Pik3cd/Prkcq/Prkcg/Mapk8/Adcy7/Itpr1/Gnas/Camk2d/Map2k6/Adcy9/Pla2g4a	mmu:11512/mmu:18442/mmu:18707/mmu:18761/mmu:18752/mmu:26419/mmu:11513/mmu:16438/mmu:14683/mmu:108058/mmu:26399/mmu:11515/mmu:18783	13
mmu04611	Platelet activation	15|346	119|6069	0.00293628	0.0276989	ENSMUSG00000026043/ENSMUSG00000029661/ENSMUSG00000022994/ENSMUSG00000001506/ENSMUSG00000039936/ENSMUSG00000030987/ENSMUSG00000020573/ENSMUSG00000044951/ENSMUSG00000031659/ENSMUSG00000049686/ENSMUSG00000030102/ENSMUSG00000027523/ENSMUSG00000062825/ENSMUSG00000005580/ENSMUSG00000056220	Col3a1/Col1a2/Adcy6/Col1a1/Pik3cd/Stim1/Pik3cg/Mylk4/Adcy7/Orai1/Itpr1/Gnas/Actg1/Adcy9/Pla2g4a	mmu:12825/mmu:12843/mmu:11512/mmu:12842/mmu:18707/mmu:20866/mmu:30955/mmu:238564/mmu:11513/mmu:109305/mmu:16438/mmu:14683/mmu:11465/mmu:11515/mmu:18783	15
mmu04723	Retrograde endocannabinoid signaling	16|346	133|6069	0.00347825	0.0317531	ENSMUSG00000022994/ENSMUSG00000078816/ENSMUSG00000031748/ENSMUSG00000034656/ENSMUSG00000032192/ENSMUSG00000021936/ENSMUSG00000033938/ENSMUSG00000026407/ENSMUSG00000027673/ENSMUSG00000031659/ENSMUSG00000025204/ENSMUSG00000030102/ENSMUSG00000005580/ENSMUSG00000030647/ENSMUSG00000001986/ENSMUSG00000005510	Adcy6/Prkcg/Gnao1/Cacna1a/Gnb5/Mapk8/Ndufb7/Cacna1s/Ndufb5/Adcy7/Ndufb8/Itpr1/Adcy9/Ndufc2/Gria3/Ndufs3	mmu:11512/mmu:18752/mmu:14681/mmu:12286/mmu:14697/mmu:26419/mmu:66916/mmu:12292/mmu:66046/mmu:11513/mmu:67264/mmu:16438/mmu:11515/mmu:68197/mmu:53623/mmu:68349	16
mmu04972	Pancreatic secretion	11|346	77|6069	0.00396359	0.035053	ENSMUSG00000022994/ENSMUSG00000078816/ENSMUSG00000007107/ENSMUSG00000019943/ENSMUSG00000031659/ENSMUSG00000030102/ENSMUSG00000027523/ENSMUSG00000005580/ENSMUSG00000020788/ENSMUSG00000059412/ENSMUSG00000041202	Adcy6/Prkcg/Atp1a4/Atp2b1/Adcy7/Itpr1/Gnas/Adcy9/Atp2a3/Fxyd2/Pla2g2d	mmu:11512/mmu:18752/mmu:27222/mmu:67972/mmu:11513/mmu:16438/mmu:14683/mmu:11515/mmu:53313/mmu:11936/mmu:18782	11
mmu04713	Circadian entrainment	12|346	89|6069	0.00433434	0.0371703	ENSMUSG00000028957/ENSMUSG00000022994/ENSMUSG00000078816/ENSMUSG00000031748/ENSMUSG00000055866/ENSMUSG00000032192/ENSMUSG00000031659/ENSMUSG00000030102/ENSMUSG00000027523/ENSMUSG00000053819/ENSMUSG00000005580/ENSMUSG00000001986	Per3/Adcy6/Prkcg/Gnao1/Per2/Gnb5/Adcy7/Itpr1/Gnas/Camk2d/Adcy9/Gria3	mmu:18628/mmu:11512/mmu:18752/mmu:14681/mmu:18627/mmu:14697/mmu:11513/mmu:16438/mmu:14683/mmu:108058/mmu:11515/mmu:53623	12
mmu05145	Toxoplasmosis	13|346	101|6069	0.00456676	0.0380116	ENSMUSG00000039239/ENSMUSG00000020573/ENSMUSG00000036594/ENSMUSG00000031748/ENSMUSG00000002603/ENSMUSG00000021936/ENSMUSG00000073421/ENSMUSG00000019899/ENSMUSG00000060586/ENSMUSG00000020623/ENSMUSG00000024401/ENSMUSG00000026479/ENSMUSG00000026840	Tgfb2/Pik3cg/H2-Aa/Gnao1/Tgfb1/Mapk8/H2-Ab1/Lama2/H2-Eb1/Map2k6/Tnf/Lamc2/Lamc3	mmu:21808/mmu:30955/mmu:14960/mmu:14681/mmu:21803/mmu:26419/mmu:14961/mmu:16773/mmu:14969/mmu:26399/mmu:21926/mmu:16782/mmu:23928	13

## Sheet: Liver KEGG WT Up
KEGGID	Description	GeneRatio	BgRatio	pvalue	padj	geneID	geneName	keggID	Count
mmu03010	Ribosome	81|922	133|6197	6.6867e-35	2.02607e-32	ENSMUSG00000020460/ENSMUSG00000067274/ENSMUSG00000032518/ENSMUSG00000046364/ENSMUSG00000028234/ENSMUSG00000008683/ENSMUSG00000038900/ENSMUSG00000045948/ENSMUSG00000000740/ENSMUSG00000037563/ENSMUSG00000037805/ENSMUSG00000025362/ENSMUSG00000029614/ENSMUSG00000090862/ENSMUSG00000012848/ENSMUSG00000007892/ENSMUSG00000090733/ENSMUSG00000030744/ENSMUSG00000003970/ENSMUSG00000003429/ENSMUSG00000030432/…	Rps27a/Rplp0/Rpsa/Rpl27a/Rps20/Rps15a/Rpl12/Mrps12/Rpl13/Rps16/Rpl10a/Rps26/Rpl6/Rps13/Rps5/Rplp1/Rps27/Rps3/Rpl8/Rps11/Rpl28/Rpl29/Rpl41/Rps19/Rpl14/Rps4x/Rps12/Rpl30/Rpl22l1/Rps3a1/Rplp2/Rpl10/Rpl15/Rps8/Rps18/Rpl18a/Rps6/Rpl4/Rps14/Rpl19/Rpl9/Rpl3/Rpl5/Rpl37a/Rps7/Rpl23/Rpl39/Rpl31/Rpl13a/Rpl34/Rpl7a/Rpl23a/Rpl37/Rps2/Mrpl34/Rpl32/Rps17/Rpl36/Rpl27/Rpl21/Rpl36a/Rps25/Fau/Mrpl17/Rpl26/Rpl11/Rpl…	mmu:78294/mmu:11837/mmu:16785/mmu:26451/mmu:67427/mmu:267019/mmu:269261/mmu:24030/mmu:270106/mmu:20055/mmu:19896/mmu:27370/mmu:19988/mmu:68052/mmu:20103/mmu:56040/mmu:57294/mmu:27050/mmu:26961/mmu:27207/mmu:19943/mmu:19944/mmu:67945/mmu:20085/mmu:67115/mmu:20102/mmu:20042/mmu:19946/mmu:68028/mmu:20091/mmu:67186/mmu:110954/mmu:66480/mmu:20116/mmu:20084/mmu:76808/mmu:20104/mmu:67891/mmu:20044/mmu:1…	81
mmu04141	Protein processing in endoplasmic reticulum	69|922	157|6197	6.79388e-19	1.02927e-16	ENSMUSG00000002014/ENSMUSG00000020571/ENSMUSG00000003814/ENSMUSG00000030062/ENSMUSG00000055401/ENSMUSG00000028757/ENSMUSG00000003402/ENSMUSG00000027248/ENSMUSG00000029616/ENSMUSG00000025823/ENSMUSG00000039615/ENSMUSG00000022136/ENSMUSG00000038312/ENSMUSG00000037470/ENSMUSG00000053317/ENSMUSG00000004460/ENSMUSG00000071650/ENSMUSG00000025130/ENSMUSG00000009293/ENSMUSG00000030104/ENSMUSG00000027006/…	Ssr4/Pdia6/Calr/Rpn1/Fbxo6/Ddost/Prkcsh/Pdia3/Erp29/Pdia4/Stub1/Dnajc3/Edem2/Uggt1/Sec61b/Dnajb11/Ganab/P4hb/Ube2g2/Edem1/Dnajc10/Dad1/Sel1l/Hsp90b1/Sec61g/Ero1lb/Rpn2/Hyou1/Os9/Lman2/Ssr1/Hspa5/Derl3/Fbxo2/Stt3a/Derl1/Sil1/Ssr3/Hsph1/Ddit3/Sec61a1/Sec63/Capn2/Edem3/Ssr2/Man1b1/Sec13/Rnf185/Mogs/Hsp90aa1/Preb/Sec61a2/Uggt2/Txndc5/Hsp90ab1/Lman1/Tram1/Dnajb1/Syvn1/Mbtps1/Eif2ak2/Ern1/Man1a2/Rrbp1/…	mmu:20832/mmu:71853/mmu:12317/mmu:103963/mmu:50762/mmu:13200/mmu:19089/mmu:14827/mmu:67397/mmu:12304/mmu:56424/mmu:100037258/mmu:108687/mmu:320011/mmu:66212/mmu:67838/mmu:14376/mmu:18453/mmu:22213/mmu:192193/mmu:66861/mmu:13135/mmu:20338/mmu:22027/mmu:20335/mmu:67475/mmu:20014/mmu:12282/mmu:216440/mmu:66890/mmu:107513/mmu:14828/mmu:70377/mmu:230904/mmu:16430/mmu:67819/mmu:81500/mmu:67437/mmu:1550…	69
mmu04610	Complement and coagulation cascades	32|922	86|6197	2.43465e-07	1.98875e-05	ENSMUSG00000026365/ENSMUSG00000021999/ENSMUSG00000035031/ENSMUSG00000033860/ENSMUSG00000033831/ENSMUSG00000024164/ENSMUSG00000026405/ENSMUSG00000023224/ENSMUSG00000017344/ENSMUSG00000030111/ENSMUSG00000022037/ENSMUSG00000028001/ENSMUSG00000026874/ENSMUSG00000038224/ENSMUSG00000029656/ENSMUSG00000022875/ENSMUSG00000031444/ENSMUSG00000059481/ENSMUSG00000027249/ENSMUSG00000060459/ENSMUSG00000037780/…	Cfh/Cpb2/C8a/Fgg/Fgb/C3/C4bp/Serping1/Vtn/A2m/Clu/Fga/Hc/Serpinf2/C8b/Kng1/F10/Plg/F2/Kng2/Mbl1/C4b/C9/Serpina1e/Cfi/Itgb2l/C1s1/Pros1/Masp2/Serpina5/F7/F12	mmu:12628/mmu:56373/mmu:230558/mmu:99571/mmu:110135/mmu:12266/mmu:12269/mmu:12258/mmu:22370/mmu:232345/mmu:12759/mmu:14161/mmu:15139/mmu:18816/mmu:110382/mmu:16644/mmu:14058/mmu:18815/mmu:14061/mmu:385643/mmu:17194/mmu:12268/mmu:12279/mmu:20704/mmu:12630/mmu:16415/mmu:50908/mmu:19128/mmu:17175/mmu:268591/mmu:14068/mmu:58992	32
mmu03060	Protein export	15|922	25|6197	2.62541e-07	1.98875e-05	ENSMUSG00000021917/ENSMUSG00000053317/ENSMUSG00000026511/ENSMUSG00000078974/ENSMUSG00000026864/ENSMUSG00000024516/ENSMUSG00000032553/ENSMUSG00000054408/ENSMUSG00000030082/ENSMUSG00000019802/ENSMUSG00000032042/ENSMUSG00000025724/ENSMUSG00000035227/ENSMUSG00000025816/ENSMUSG00000014504	Spcs1/Sec61b/Srp9/Sec61g/Hspa5/Sec11c/Srprb/Spcs3/Sec61a1/Sec63/Srpr/Sec11a/Spcs2/Sec61a2/Srp19	mmu:69019/mmu:66212/mmu:27058/mmu:20335/mmu:14828/mmu:66286/mmu:20818/mmu:76687/mmu:53421/mmu:140740/mmu:67398/mmu:56529/mmu:66624/mmu:57743/mmu:66384	15
mmu00510	N-Glycan biosynthesis	21|922	45|6197	3.60227e-07	2.02218e-05	ENSMUSG00000030062/ENSMUSG00000028757/ENSMUSG00000071650/ENSMUSG00000022174/ENSMUSG00000027642/ENSMUSG00000032116/ENSMUSG00000039427/ENSMUSG00000036155/ENSMUSG00000033809/ENSMUSG00000035704/ENSMUSG00000036646/ENSMUSG00000052423/ENSMUSG00000030036/ENSMUSG00000035845/ENSMUSG00000008763/ENSMUSG00000026856/ENSMUSG00000032059/ENSMUSG00000032437/ENSMUSG00000075419/ENSMUSG00000032123/ENSMUSG00000020346	Rpn1/Ddost/Ganab/Dad1/Rpn2/Stt3a/Alg1/Mgat5/Alg3/Alg8/Man1b1/B4galt3/Mogs/Alg12/Man1a2/Dolpp1/Alg9/Stt3b/Dolk/Dpagt1/Mgat1	mmu:103963/mmu:13200/mmu:14376/mmu:13135/mmu:20014/mmu:16430/mmu:208211/mmu:107895/mmu:208624/mmu:381903/mmu:227619/mmu:57370/mmu:57377/mmu:223774/mmu:17156/mmu:57170/mmu:102580/mmu:68292/mmu:227697/mmu:13478/mmu:17308	21
mmu03030	DNA replication	18|922	35|6197	4.00431e-07	2.02218e-05	ENSMUSG00000026355/ENSMUSG00000023104/ENSMUSG00000024854/ENSMUSG00000022673/ENSMUSG00000029363/ENSMUSG00000002870/ENSMUSG00000025395/ENSMUSG00000028884/ENSMUSG00000028394/ENSMUSG00000029730/ENSMUSG00000005410/ENSMUSG00000030042/ENSMUSG00000036875/ENSMUSG00000041859/ENSMUSG00000038644/ENSMUSG00000030726/ENSMUSG00000007080/ENSMUSG00000033970	Mcm6/Rfc2/Pold4/Mcm4/Rfc5/Mcm2/Prim1/Rpa2/Pole3/Mcm7/Mcm5/Pole4/Dna2/Mcm3/Pold1/Pold3/Pole/Rfc3	mmu:17219/mmu:19718/mmu:69745/mmu:17217/mmu:72151/mmu:17216/mmu:19075/mmu:19891/mmu:59001/mmu:17220/mmu:17218/mmu:66979/mmu:327762/mmu:17215/mmu:18971/mmu:67967/mmu:18973/mmu:69263	18
mmu00563	Glycosylphosphatidylinositol (GPI)-anchor biosynthesis	11|922	25|6197	0.000446324	0.0193195	ENSMUSG00000017721/ENSMUSG00000022561/ENSMUSG00000028454/ENSMUSG00000038383/ENSMUSG00000041958/ENSMUSG00000031381/ENSMUSG00000073678/ENSMUSG00000021120/ENSMUSG00000024145/ENSMUSG00000079469/ENSMUSG00000056536	Pigt/Gpaa1/Pigo/Pigu/Pigs/Piga/Pgap1/Pigh/Pigf/Pigb/Pign	mmu:78928/mmu:14731/mmu:56703/mmu:228812/mmu:276846/mmu:18700/mmu:241062/mmu:110417/mmu:18701/mmu:55981/mmu:27392	11

## Sheet: Liver KEGG WT Down
KEGGID	Description	GeneRatio	BgRatio	pvalue	padj	geneID	geneName	keggID	Count
mmu01200	Carbon metabolism	57|997	112|6197	7.12063e-18	1.81405e-15	ENSMUSG00000032418/ENSMUSG00000062908/ENSMUSG00000041650/ENSMUSG00000022853/ENSMUSG00000009863/ENSMUSG00000021238/ENSMUSG00000063524/ENSMUSG00000031299/ENSMUSG00000031700/ENSMUSG00000021748/ENSMUSG00000021957/ENSMUSG00000027406/ENSMUSG00000028307/ENSMUSG00000052738/ENSMUSG00000020321/ENSMUSG00000021577/ENSMUSG00000041237/ENSMUSG00000030541/ENSMUSG00000053604/ENSMUSG00000021996/ENSMUSG00000002010/…	Me1/Acadm/Pcca/Ehhadh/Sdhb/Aldh6a1/Eno1/Pdha1/Gpt2/Pdhb/Tkt/Idh3b/Aldob/Suclg1/Mdh1/Sdha/Pklr/Idh2/Rpia/Esd/Idh3g/Shmt1/Sucla2/Hk2/Cat/Dlat/Sdhd/Idh1/Hao1/Hadha/Hibch/Hao2/Mut/Dlst/Acss2/Mcee/Acads/Aldoa/Echs1/Cps1/Taldo1/Dld/Gpi1/Gcsh/Eno1b/Acat1/Suclg2/Hk1/Rgn/Mdh2/Acss1/Gpt/Pfkp/Ogdh/Gapdh/Got1/Cs	mmu:17436/mmu:11364/mmu:110821/mmu:74147/mmu:67680/mmu:104776/mmu:13806/mmu:18597/mmu:108682/mmu:68263/mmu:21881/mmu:170718/mmu:230163/mmu:56451/mmu:17449/mmu:66945/mmu:18770/mmu:269951/mmu:19895/mmu:13885/mmu:15929/mmu:20425/mmu:20916/mmu:15277/mmu:12359/mmu:235339/mmu:66925/mmu:15926/mmu:15112/mmu:97212/mmu:227095/mmu:56185/mmu:17850/mmu:78920/mmu:60525/mmu:73724/mmu:11409/mmu:11674/mmu:93747/m…	57
mmu00280	Valine, leucine and isoleucine degradation	36|997	52|6197	1.18179e-17	1.81405e-15	ENSMUSG00000062908/ENSMUSG00000041650/ENSMUSG00000022853/ENSMUSG00000021238/ENSMUSG00000010651/ENSMUSG00000027709/ENSMUSG00000029776/ENSMUSG00000059447/ENSMUSG00000010025/ENSMUSG00000027984/ENSMUSG00000021646/ENSMUSG00000000340/ENSMUSG00000029455/ENSMUSG00000025745/ENSMUSG00000057880/ENSMUSG00000041426/ENSMUSG00000032263/ENSMUSG00000023921/ENSMUSG00000033429/ENSMUSG00000031969/ENSMUSG00000036880/…	Acadm/Pcca/Ehhadh/Aldh6a1/Acaa1b/Mccc1/Hibadh/Hadhb/Aldh3a2/Hadh/Mccc2/Dbt/Aldh2/Hadha/Abat/Hibch/Bckdhb/Mut/Mcee/Acad8/Acaa2/Acads/Echs1/Acadsb/Dld/Aldh9a1/Aacs/Aox1/Acaa1a/Auh/Hmgcl/Acat1/Hsd17b10/Aldh7a1/Ivd/Hmgcs2	mmu:11364/mmu:110821/mmu:74147/mmu:104776/mmu:235674/mmu:72039/mmu:58875/mmu:231086/mmu:11671/mmu:15107/mmu:78038/mmu:13171/mmu:11669/mmu:97212/mmu:268860/mmu:227095/mmu:12040/mmu:17850/mmu:73724/mmu:66948/mmu:52538/mmu:11409/mmu:93747/mmu:66885/mmu:13382/mmu:56752/mmu:78894/mmu:11761/mmu:113868/mmu:11992/mmu:15356/mmu:110446/mmu:15108/mmu:110695/mmu:56357/mmu:15360	36
mmu05012	Parkinson disease	59|997	132|6197	4.14153e-15	4.23817e-13	ENSMUSG00000026032/ENSMUSG00000030884/ENSMUSG00000021520/ENSMUSG00000009863/ENSMUSG00000026260/ENSMUSG00000064360/ENSMUSG00000025651/ENSMUSG00000017778/ENSMUSG00000005510/ENSMUSG00000064356/ENSMUSG00000064357/ENSMUSG00000025968/ENSMUSG00000038462/ENSMUSG00000025781/ENSMUSG00000021577/ENSMUSG00000016319/ENSMUSG00000064367/ENSMUSG00000064358/ENSMUSG00000000563/ENSMUSG00000031231/ENSMUSG00000064368/…	Ndufb3/Uqcrc2/Uqcrb/Sdhb/Ndufa10/mt-Nd3/Uqcrc1/Cox7c/Ndufs3/mt-Atp8/mt-Atp6/Ndufs1/Uqcrfs1/Atp5c1/Sdha/Slc25a5/mt-Nd5/mt-Co3/Atp5f1/Cox7b/mt-Nd6/Sdhd/Cox5b/Ndufs2/Ndufb8/Cyc1/Ndufb10/Ndufb9/Ndufv1/Ndufa6/Atp5a1/Ndufa9/mt-Nd4l/Atp5b/Ndufv2/Ndufab1/Ndufc2/Vdac1/Atp5g3/mt-Cytb/mt-Co1/Apaf1/Ndufa12/Cox6c/Ndufb5/Ndufa13/Atp5h/Atp5j/Uqcr10/Ndufa4/Ndufa7/mt-Nd4/Adcy5/Pink1/Ndufb6/Ndufs5/Slc25a4/Ube2g1/V…	mmu:66495/mmu:67003/mmu:67530/mmu:67680/mmu:67273/mmu:17718/mmu:22273/mmu:12867/mmu:68349/mmu:17706/mmu:17705/mmu:227197/mmu:66694/mmu:11949/mmu:66945/mmu:11740/mmu:17721/mmu:17710/mmu:11950/mmu:66142/mmu:17722/mmu:66925/mmu:12859/mmu:226646/mmu:67264/mmu:66445/mmu:68342/mmu:66218/mmu:17995/mmu:67130/mmu:11946/mmu:66108/mmu:17720/mmu:11947/mmu:72900/mmu:70316/mmu:68197/mmu:22333/mmu:228033/mmu:17…	59
mmu00190	Oxidative phosphorylation	56|997	124|6197	1.21787e-14	9.34716e-13	ENSMUSG00000026032/ENSMUSG00000030884/ENSMUSG00000021520/ENSMUSG00000009863/ENSMUSG00000026260/ENSMUSG00000064360/ENSMUSG00000025651/ENSMUSG00000017778/ENSMUSG00000005510/ENSMUSG00000064356/ENSMUSG00000064357/ENSMUSG00000025968/ENSMUSG00000038462/ENSMUSG00000025781/ENSMUSG00000021577/ENSMUSG00000064367/ENSMUSG00000064358/ENSMUSG00000000563/ENSMUSG00000028013/ENSMUSG00000031231/ENSMUSG00000064368/…	Ndufb3/Uqcrc2/Uqcrb/Sdhb/Ndufa10/mt-Nd3/Uqcrc1/Cox7c/Ndufs3/mt-Atp8/mt-Atp6/Ndufs1/Uqcrfs1/Atp5c1/Sdha/mt-Nd5/mt-Co3/Atp5f1/Ppa2/Cox7b/mt-Nd6/Atp5j2/Sdhd/Cox5b/Ndufs2/Ndufb8/Cyc1/Atp6v1h/Ndufb10/Ndufb9/Ndufv1/Ndufa6/Atp5a1/Ndufa9/mt-Nd4l/Atp5b/Ndufv2/Ndufab1/Ndufc2/Atp5g3/mt-Cytb/mt-Co1/Lhpp/Ndufa12/Cox6c/Ndufb5/Atp6v1e1/Ndufa13/Atp5h/Atp5j/Uqcr10/Ndufa4/Ndufa7/mt-Nd4/Ndufb6/Ndufs5	mmu:66495/mmu:67003/mmu:67530/mmu:67680/mmu:67273/mmu:17718/mmu:22273/mmu:12867/mmu:68349/mmu:17706/mmu:17705/mmu:227197/mmu:66694/mmu:11949/mmu:66945/mmu:17721/mmu:17710/mmu:11950/mmu:74776/mmu:66142/mmu:17722/mmu:57423/mmu:66925/mmu:12859/mmu:226646/mmu:67264/mmu:66445/mmu:108664/mmu:68342/mmu:66218/mmu:17995/mmu:67130/mmu:11946/mmu:66108/mmu:17720/mmu:11947/mmu:72900/mmu:70316/mmu:68197/mmu:22…	56
mmu00640	Propanoate metabolism	23|997	29|6197	8.05931e-14	4.94841e-12	ENSMUSG00000062908/ENSMUSG00000041650/ENSMUSG00000022853/ENSMUSG00000021238/ENSMUSG00000052738/ENSMUSG00000020532/ENSMUSG00000022110/ENSMUSG00000035948/ENSMUSG00000000340/ENSMUSG00000025745/ENSMUSG00000057880/ENSMUSG00000041426/ENSMUSG00000032263/ENSMUSG00000023921/ENSMUSG00000027605/ENSMUSG00000033429/ENSMUSG00000025465/ENSMUSG00000020664/ENSMUSG00000042010/ENSMUSG00000032047/ENSMUSG00000019883/…	Acadm/Pcca/Ehhadh/Aldh6a1/Suclg1/Acaca/Sucla2/Acss3/Dbt/Hadha/Abat/Hibch/Bckdhb/Mut/Acss2/Mcee/Echs1/Dld/Acacb/Acat1/Echdc1/Suclg2/Acss1	mmu:11364/mmu:110821/mmu:74147/mmu:104776/mmu:56451/mmu:107476/mmu:20916/mmu:380660/mmu:13171/mmu:97212/mmu:268860/mmu:227095/mmu:12040/mmu:17850/mmu:60525/mmu:73724/mmu:93747/mmu:13382/mmu:100705/mmu:110446/mmu:52665/mmu:20917/mmu:68738	23
mmu00980	Metabolism of xenobiotics by cytochrome P450	35|997	63|6197	6.37425e-13	2.87001e-11	ENSMUSG00000038776/ENSMUSG00000058135/ENSMUSG00000025934/ENSMUSG00000032348/ENSMUSG00000033318/ENSMUSG00000001663/ENSMUSG00000001665/ENSMUSG00000051483/ENSMUSG00000035836/ENSMUSG00000026688/ENSMUSG00000057933/ENSMUSG00000054630/ENSMUSG00000089943/ENSMUSG00000070704/ENSMUSG00000090175/ENSMUSG00000004038/ENSMUSG00000025068/ENSMUSG00000011382/ENSMUSG00000029864/ENSMUSG00000068762/ENSMUSG00000074183/…	Ephx1/Gstm1/Gsta3/Gsta4/Gstt2/Gstt1/Gstt3/Cbr1/Ugt2b1/Mgst3/Gsta2/Ugt2b5/Ugt1a5/Ugt2b36/Ugt1a9/Gstm3/Gsto1/Dhdh/Gstk1/Gstm6/Gsta1/Ugt2a3/Ugt2b35/Hsd11b1/Gstm4/Cyp2f2/Cbr3/Hpgds/Cyp2e1/Ugt1a6a/Gstm2/Ugt2b34/Adh1/Ugt1a1/Cyp1b1	mmu:13849/mmu:14862/mmu:14859/mmu:14860/mmu:14872/mmu:14871/mmu:103140/mmu:12408/mmu:71773/mmu:66447/mmu:14858/mmu:22238/mmu:394433/mmu:231396/mmu:394434/mmu:14864/mmu:14873/mmu:71755/mmu:76263/mmu:14867/mmu:14857/mmu:72094/mmu:243085/mmu:15483/mmu:14865/mmu:13107/mmu:109857/mmu:54486/mmu:13106/mmu:94284/mmu:14863/mmu:100727/mmu:11522/mmu:394436/mmu:13078	35
mmu05010	Alzheimer disease	64|997	164|6197	6.544e-13	2.87001e-11	ENSMUSG00000027820/ENSMUSG00000026032/ENSMUSG00000030884/ENSMUSG00000021520/ENSMUSG00000009863/ENSMUSG00000018411/ENSMUSG00000026260/ENSMUSG00000025651/ENSMUSG00000017778/ENSMUSG00000005510/ENSMUSG00000064356/ENSMUSG00000064357/ENSMUSG00000025968/ENSMUSG00000038462/ENSMUSG00000025781/ENSMUSG00000021577/ENSMUSG00000064358/ENSMUSG00000000563/ENSMUSG00000028161/ENSMUSG00000031231/ENSMUSG00000000171/…	Mme/Ndufb3/Uqcrc2/Uqcrb/Sdhb/Mapt/Ndufa10/Uqcrc1/Cox7c/Ndufs3/mt-Atp8/mt-Atp6/Ndufs1/Uqcrfs1/Atp5c1/Sdha/mt-Co3/Atp5f1/Ppp3ca/Cox7b/Sdhd/Cox5b/Ndufs2/Ndufb8/Cyc1/Ndufb10/Ndufb9/Ndufv1/App/Ndufa6/Atp5a1/Ndufa9/Atp5b/Gsk3b/Ndufv2/Ndufab1/Ndufc2/Atp5g3/mt-Cytb/mt-Co1/Apaf1/Ndufa12/Cox6c/Ndufb5/Ndufa13/Atp5h/Atp2a1/Atp5j/Uqcr10/Ndufa4/Ndufa7/Hsd17b10/Ppp3cb/Itpr3/Casp12/Ndufb6/Apoe/Ndufs5/Nae1/Cacna1…	mmu:17380/mmu:66495/mmu:67003/mmu:67530/mmu:67680/mmu:17762/mmu:67273/mmu:22273/mmu:12867/mmu:68349/mmu:17706/mmu:17705/mmu:227197/mmu:66694/mmu:11949/mmu:66945/mmu:17710/mmu:11950/mmu:19055/mmu:66142/mmu:66925/mmu:12859/mmu:226646/mmu:67264/mmu:66445/mmu:68342/mmu:66218/mmu:17995/mmu:11820/mmu:67130/mmu:11946/mmu:66108/mmu:11947/mmu:56637/mmu:72900/mmu:70316/mmu:68197/mmu:228033/mmu:17711/mmu:17…	64
mmu05204	Chemical carcinogenesis	41|997	84|6197	2.01449e-12	7.7306e-11	ENSMUSG00000032808/ENSMUSG00000038776/ENSMUSG00000058135/ENSMUSG00000025934/ENSMUSG00000032348/ENSMUSG00000033318/ENSMUSG00000001663/ENSMUSG00000001665/ENSMUSG00000051483/ENSMUSG00000035836/ENSMUSG00000026688/ENSMUSG00000057933/ENSMUSG00000054630/ENSMUSG00000089943/ENSMUSG00000070704/ENSMUSG00000090175/ENSMUSG00000004038/ENSMUSG00000025068/ENSMUSG00000029864/ENSMUSG00000056035/ENSMUSG00000068762/…	Cyp2c38/Ephx1/Gstm1/Gsta3/Gsta4/Gstt2/Gstt1/Gstt3/Cbr1/Ugt2b1/Mgst3/Gsta2/Ugt2b5/Ugt1a5/Ugt2b36/Ugt1a9/Gstm3/Gsto1/Gstk1/Cyp3a11/Gstm6/Gsta1/Ugt2a3/Ugt2b35/Hsd11b1/Gstm4/Cyp2b13/Cyp3a25/Sult1a1/Hpgds/Cyp2e1/Cyp2c37/Cyp2c68/Ugt1a6a/Gstm2/Ugt2b34/Cyp2c50/Adh1/Ugt1a1/Cyp1b1/Cyp2b9	mmu:13097/mmu:13849/mmu:14862/mmu:14859/mmu:14860/mmu:14872/mmu:14871/mmu:103140/mmu:12408/mmu:71773/mmu:66447/mmu:14858/mmu:22238/mmu:394433/mmu:231396/mmu:394434/mmu:14864/mmu:14873/mmu:76263/mmu:13112/mmu:14867/mmu:14857/mmu:72094/mmu:243085/mmu:15483/mmu:14865/mmu:13089/mmu:56388/mmu:20887/mmu:54486/mmu:13106/mmu:13096/mmu:433247/mmu:94284/mmu:14863/mmu:100727/mmu:107141/mmu:11522/mmu:394436/…	41
mmu00983	Drug metabolism - other enzymes	40|997	84|6197	1.02308e-11	3.48986e-10	ENSMUSG00000061959/ENSMUSG00000056973/ENSMUSG00000058135/ENSMUSG00000025934/ENSMUSG00000032348/ENSMUSG00000033318/ENSMUSG00000001663/ENSMUSG00000001665/ENSMUSG00000031886/ENSMUSG00000035836/ENSMUSG00000026688/ENSMUSG00000057933/ENSMUSG00000054630/ENSMUSG00000089943/ENSMUSG00000031725/ENSMUSG00000070704/ENSMUSG00000090175/ENSMUSG00000004038/ENSMUSG00000025068/ENSMUSG00000025630/ENSMUSG00000068762/…	Ces1e/Ces1d/Gstm1/Gsta3/Gsta4/Gstt2/Gstt1/Gstt3/Ces2e/Ugt2b1/Mgst3/Gsta2/Ugt2b5/Ugt1a5/Ces1f/Ugt2b36/Ugt1a9/Gstm3/Gsto1/Hprt/Gstm6/Gsta1/Ugt2a3/Ugt2b35/Dpys/Gstm4/Rrm2/Ces2c/Dpyd/Cyp2e1/Upp1/Cmpk1/Ugt1a6a/Gstm2/Ugt2b34/Tk2/Upb1/Ugt1a1/Upp2/Uck1	mmu:13897/mmu:104158/mmu:14862/mmu:14859/mmu:14860/mmu:14872/mmu:14871/mmu:103140/mmu:234673/mmu:71773/mmu:66447/mmu:14858/mmu:22238/mmu:394433/mmu:234564/mmu:231396/mmu:394434/mmu:14864/mmu:14873/mmu:15452/mmu:14867/mmu:14857/mmu:72094/mmu:243085/mmu:64705/mmu:14865/mmu:20135/mmu:234671/mmu:99586/mmu:13106/mmu:22271/mmu:66588/mmu:94284/mmu:14863/mmu:100727/mmu:57813/mmu:103149/mmu:394436/mmu:766…	40
mmu00982	Drug metabolism - cytochrome P450	33|997	62|6197	1.44265e-11	4.42893e-10	ENSMUSG00000058135/ENSMUSG00000025934/ENSMUSG00000032348/ENSMUSG00000033318/ENSMUSG00000001663/ENSMUSG00000001665/ENSMUSG00000040181/ENSMUSG00000035836/ENSMUSG00000026688/ENSMUSG00000040147/ENSMUSG00000057933/ENSMUSG00000054630/ENSMUSG00000089943/ENSMUSG00000070704/ENSMUSG00000090175/ENSMUSG00000004038/ENSMUSG00000025068/ENSMUSG00000029864/ENSMUSG00000068762/ENSMUSG00000074183/ENSMUSG00000035780/…	Gstm1/Gsta3/Gsta4/Gstt2/Gstt1/Gstt3/Fmo1/Ugt2b1/Mgst3/Maob/Gsta2/Ugt2b5/Ugt1a5/Ugt2b36/Ugt1a9/Gstm3/Gsto1/Gstk1/Gstm6/Gsta1/Ugt2a3/Ugt2b35/Gstm4/Fmo5/Fmo2/Hpgds/Cyp2e1/Aox1/Ugt1a6a/Gstm2/Ugt2b34/Adh1/Ugt1a1	mmu:14862/mmu:14859/mmu:14860/mmu:14872/mmu:14871/mmu:103140/mmu:14261/mmu:71773/mmu:66447/mmu:109731/mmu:14858/mmu:22238/mmu:394433/mmu:231396/mmu:394434/mmu:14864/mmu:14873/mmu:76263/mmu:14867/mmu:14857/mmu:72094/mmu:243085/mmu:14865/mmu:14263/mmu:55990/mmu:54486/mmu:13106/mmu:11761/mmu:94284/mmu:14863/mmu:100727/mmu:11522/mmu:394436	33
mmu00020	Citrate cycle (TCA cycle)	21|997	29|6197	2.11084e-11	5.89117e-10	ENSMUSG00000009863/ENSMUSG00000031299/ENSMUSG00000021748/ENSMUSG00000027406/ENSMUSG00000052738/ENSMUSG00000020321/ENSMUSG00000021577/ENSMUSG00000030541/ENSMUSG00000002010/ENSMUSG00000022110/ENSMUSG00000000168/ENSMUSG00000000171/ENSMUSG00000025950/ENSMUSG00000004789/ENSMUSG00000020664/ENSMUSG00000020917/ENSMUSG00000061838/ENSMUSG00000019179/ENSMUSG00000027513/ENSMUSG00000020456/ENSMUSG00000005683	Sdhb/Pdha1/Pdhb/Idh3b/Suclg1/Mdh1/Sdha/Idh2/Idh3g/Sucla2/Dlat/Sdhd/Idh1/Dlst/Dld/Acly/Suclg2/Mdh2/Pck1/Ogdh/Cs	mmu:67680/mmu:18597/mmu:68263/mmu:170718/mmu:56451/mmu:17449/mmu:66945/mmu:269951/mmu:15929/mmu:20916/mmu:235339/mmu:66925/mmu:15926/mmu:78920/mmu:13382/mmu:104112/mmu:20917/mmu:17448/mmu:18534/mmu:18293/mmu:12974	21
mmu00830	Retinol metabolism	35|997	78|6197	1.55656e-09	3.9822e-08	ENSMUSG00000032808/ENSMUSG00000005547/ENSMUSG00000035836/ENSMUSG00000054630/ENSMUSG00000074254/ENSMUSG00000069456/ENSMUSG00000089943/ENSMUSG00000070704/ENSMUSG00000090175/ENSMUSG00000056666/ENSMUSG00000056035/ENSMUSG00000028003/ENSMUSG00000035780/ENSMUSG00000035811/ENSMUSG00000066071/ENSMUSG00000040583/ENSMUSG00000029630/ENSMUSG00000031220/ENSMUSG00000025396/ENSMUSG00000060407/ENSMUSG00000066441/…	Cyp2c38/Cyp2a5/Ugt2b1/Ugt2b5/Cyp2a4/Rdh16/Ugt1a5/Ugt2b36/Ugt1a9/Retsat/Cyp3a11/Lrat/Ugt2a3/Ugt2b35/Cyp4a12a/Cyp2b13/Cyp3a25/Awat2/Hsd17b6/Cyp2a12/Rdh11/Cyp2c37/Aox1/Dhrs4/Aldh1a7/Cyp26a1/Cyp2c68/Ugt1a6a/Aldh1a1/Ugt2b34/Cyp2c50/Adh1/Ugt1a1/Dgat1/Cyp2b9	mmu:13097/mmu:13087/mmu:71773/mmu:22238/mmu:13086/mmu:19683/mmu:394433/mmu:231396/mmu:394434/mmu:67442/mmu:13112/mmu:79235/mmu:72094/mmu:243085/mmu:277753/mmu:13089/mmu:56388/mmu:245532/mmu:27400/mmu:13085/mmu:17252/mmu:13096/mmu:11761/mmu:28200/mmu:26358/mmu:13082/mmu:433247/mmu:94284/mmu:11668/mmu:100727/mmu:107141/mmu:11522/mmu:394436/mmu:13350/mmu:13094	35
mmu04714	Thermogenesis	70|997	222|6197	4.34653e-09	1.02645e-07	ENSMUSG00000026032/ENSMUSG00000030884/ENSMUSG00000021520/ENSMUSG00000009863/ENSMUSG00000026260/ENSMUSG00000064360/ENSMUSG00000025651/ENSMUSG00000000440/ENSMUSG00000017778/ENSMUSG00000005510/ENSMUSG00000064356/ENSMUSG00000064357/ENSMUSG00000025968/ENSMUSG00000038462/ENSMUSG00000025781/ENSMUSG00000021577/ENSMUSG00000064367/ENSMUSG00000064358/ENSMUSG00000000563/ENSMUSG00000025509/ENSMUSG00000031231/…	Ndufb3/Uqcrc2/Uqcrb/Sdhb/Ndufa10/mt-Nd3/Uqcrc1/Pparg/Cox7c/Ndufs3/mt-Atp8/mt-Atp6/Ndufs1/Uqcrfs1/Atp5c1/Sdha/mt-Nd5/mt-Co3/Atp5f1/Pnpla2/Cox7b/mt-Nd6/Atp5j2/Sdhd/Cox5b/Ndufs2/Ndufb8/Cyc1/Cox19/Ndufb10/Cpt1a/Mgll/Ndufb9/Ndufv1/Creb3l1/Ndufa6/Atp5a1/Ndufa9/Ndufaf6/mt-Nd4l/Atp5b/Ndufv2/Ndufab1/Ndufc2/Ndufaf1/Sos1/Atp5g3/mt-Cytb/mt-Co1/Acsl5/Ndufa12/Mapk12/Cox6c/Ndufb5/Ndufa13/Atp5h/Atp5j/Uqcr10/Nduf…	mmu:66495/mmu:67003/mmu:67530/mmu:67680/mmu:67273/mmu:17718/mmu:22273/mmu:19016/mmu:12867/mmu:68349/mmu:17706/mmu:17705/mmu:227197/mmu:66694/mmu:11949/mmu:66945/mmu:17721/mmu:17710/mmu:11950/mmu:66853/mmu:66142/mmu:17722/mmu:57423/mmu:66925/mmu:12859/mmu:226646/mmu:67264/mmu:66445/mmu:68033/mmu:68342/mmu:12894/mmu:23945/mmu:66218/mmu:17995/mmu:26427/mmu:67130/mmu:11946/mmu:66108/mmu:76947/mmu:177…	70
mmu01212	Fatty acid metabolism	26|997	51|6197	7.28581e-09	1.59767e-07	ENSMUSG00000062908/ENSMUSG00000022853/ENSMUSG00000010651/ENSMUSG00000041220/ENSMUSG00000026003/ENSMUSG00000059447/ENSMUSG00000020532/ENSMUSG00000010663/ENSMUSG00000021364/ENSMUSG00000027984/ENSMUSG00000025745/ENSMUSG00000024900/ENSMUSG00000032349/ENSMUSG00000037071/ENSMUSG00000036880/ENSMUSG00000024665/ENSMUSG00000029545/ENSMUSG00000025153/ENSMUSG00000027195/ENSMUSG00000025465/ENSMUSG00000030861/…	Acadm/Ehhadh/Acaa1b/Elovl6/Acadl/Hadhb/Acaca/Fads1/Elovl2/Hadh/Hadha/Cpt1a/Elovl5/Scd1/Acaa2/Fads2/Acads/Fasn/Hsd17b12/Echs1/Acadsb/Acsl5/Pecr/Acaa1a/Tecr/Acat1	mmu:11364/mmu:74147/mmu:235674/mmu:170439/mmu:11363/mmu:231086/mmu:107476/mmu:76267/mmu:54326/mmu:15107/mmu:97212/mmu:12894/mmu:68801/mmu:20249/mmu:52538/mmu:56473/mmu:11409/mmu:14104/mmu:56348/mmu:93747/mmu:66885/mmu:433256/mmu:111175/mmu:113868/mmu:106529/mmu:110446	26
mmu00071	Fatty acid degradation	24|997	47|6197	2.66852e-08	5.46157e-07	ENSMUSG00000062908/ENSMUSG00000024132/ENSMUSG00000022853/ENSMUSG00000010651/ENSMUSG00000026003/ENSMUSG00000059447/ENSMUSG00000010025/ENSMUSG00000027984/ENSMUSG00000029455/ENSMUSG00000025745/ENSMUSG00000024900/ENSMUSG00000066071/ENSMUSG00000003809/ENSMUSG00000036880/ENSMUSG00000029545/ENSMUSG00000025465/ENSMUSG00000030861/ENSMUSG00000024981/ENSMUSG00000026687/ENSMUSG00000036138/ENSMUSG00000032047/…	Acadm/Eci1/Ehhadh/Acaa1b/Acadl/Hadhb/Aldh3a2/Hadh/Aldh2/Hadha/Cpt1a/Cyp4a12a/Gcdh/Acaa2/Acads/Echs1/Acadsb/Acsl5/Aldh9a1/Acaa1a/Acat1/Eci2/Aldh7a1/Adh1	mmu:11364/mmu:13177/mmu:74147/mmu:235674/mmu:11363/mmu:231086/mmu:11671/mmu:15107/mmu:11669/mmu:97212/mmu:12894/mmu:277753/mmu:270076/mmu:52538/mmu:11409/mmu:93747/mmu:66885/mmu:433256/mmu:56752/mmu:113868/mmu:110446/mmu:23986/mmu:110695/mmu:11522	24
mmu00620	Pyruvate metabolism	20|997	35|6197	3.24014e-08	6.21702e-07	ENSMUSG00000032418/ENSMUSG00000031299/ENSMUSG00000021748/ENSMUSG00000020532/ENSMUSG00000020321/ENSMUSG00000041237/ENSMUSG00000010025/ENSMUSG00000000168/ENSMUSG00000029455/ENSMUSG00000027605/ENSMUSG00000020664/ENSMUSG00000026687/ENSMUSG00000060923/ENSMUSG00000042010/ENSMUSG00000032047/ENSMUSG00000021620/ENSMUSG00000053644/ENSMUSG00000019179/ENSMUSG00000027452/ENSMUSG00000027513	Me1/Pdha1/Pdhb/Acaca/Mdh1/Pklr/Aldh3a2/Dlat/Aldh2/Acss2/Dld/Aldh9a1/Acyp2/Acacb/Acat1/Acot12/Aldh7a1/Mdh2/Acss1/Pck1	mmu:17436/mmu:18597/mmu:68263/mmu:107476/mmu:17449/mmu:18770/mmu:11671/mmu:235339/mmu:11669/mmu:60525/mmu:13382/mmu:56752/mmu:75572/mmu:100705/mmu:110446/mmu:74156/mmu:110695/mmu:17448/mmu:68738/mmu:18534	20
mmu05016	Huntington disease	58|997	183|6197	7.87712e-08	1.42252e-06	ENSMUSG00000026032/ENSMUSG00000030884/ENSMUSG00000021520/ENSMUSG00000009863/ENSMUSG00000026260/ENSMUSG00000025651/ENSMUSG00000000440/ENSMUSG00000017778/ENSMUSG00000005510/ENSMUSG00000064356/ENSMUSG00000064357/ENSMUSG00000025968/ENSMUSG00000038462/ENSMUSG00000025781/ENSMUSG00000021577/ENSMUSG00000016319/ENSMUSG00000064358/ENSMUSG00000000563/ENSMUSG00000031231/ENSMUSG00000000171/ENSMUSG00000061518/…	Ndufb3/Uqcrc2/Uqcrb/Sdhb/Ndufa10/Uqcrc1/Pparg/Cox7c/Ndufs3/mt-Atp8/mt-Atp6/Ndufs1/Uqcrfs1/Atp5c1/Sdha/Slc25a5/mt-Co3/Atp5f1/Cox7b/Sdhd/Cox5b/Ndufs2/Ndufb8/Cyc1/Ndufb10/Ndufb9/Ndufv1/Creb3l1/Ndufa6/Atp5a1/Ndufa9/Atp5b/Ndufv2/Ndufab1/Ndufc2/Vdac1/Atp5g3/Sod1/mt-Cytb/mt-Co1/Apaf1/Ndufa12/Cox6c/Ndufb5/Ndufa13/Atp5h/Taf4b/Atp5j/Uqcr10/Ndufa4/Ndufa7/Trp53/Ndufb6/Ndufs5/Slc25a4/Vdac2/Ppargc1a/Casp8	mmu:66495/mmu:67003/mmu:67530/mmu:67680/mmu:67273/mmu:22273/mmu:19016/mmu:12867/mmu:68349/mmu:17706/mmu:17705/mmu:227197/mmu:66694/mmu:11949/mmu:66945/mmu:11740/mmu:17710/mmu:11950/mmu:66142/mmu:66925/mmu:12859/mmu:226646/mmu:67264/mmu:66445/mmu:68342/mmu:66218/mmu:17995/mmu:26427/mmu:67130/mmu:11946/mmu:66108/mmu:11947/mmu:72900/mmu:70316/mmu:68197/mmu:22333/mmu:228033/mmu:20655/mmu:17711/mmu:17…	58
mmu00053	Ascorbate and aldarate metabolism	16|997	25|6197	8.69606e-08	1.48316e-06	ENSMUSG00000035836/ENSMUSG00000054630/ENSMUSG00000089943/ENSMUSG00000070704/ENSMUSG00000090175/ENSMUSG00000010025/ENSMUSG00000029455/ENSMUSG00000035780/ENSMUSG00000035811/ENSMUSG00000026687/ENSMUSG00000054545/ENSMUSG00000053644/ENSMUSG00000023070/ENSMUSG00000029260/ENSMUSG00000029201/ENSMUSG00000089960	Ugt2b1/Ugt2b5/Ugt1a5/Ugt2b36/Ugt1a9/Aldh3a2/Aldh2/Ugt2a3/Ugt2b35/Aldh9a1/Ugt1a6a/Aldh7a1/Rgn/Ugt2b34/Ugdh/Ugt1a1	mmu:71773/mmu:22238/mmu:394433/mmu:231396/mmu:394434/mmu:11671/mmu:11669/mmu:72094/mmu:243085/mmu:56752/mmu:94284/mmu:110695/mmu:19733/mmu:100727/mmu:22235/mmu:394436	16
mmu00650	Butanoate metabolism	16|997	27|6197	4.02234e-07	6.17429e-06	ENSMUSG00000022853/ENSMUSG00000020988/ENSMUSG00000027984/ENSMUSG00000030972/ENSMUSG00000025745/ENSMUSG00000057880/ENSMUSG00000028167/ENSMUSG00000030935/ENSMUSG00000029545/ENSMUSG00000025465/ENSMUSG00000035936/ENSMUSG00000029482/ENSMUSG00000028672/ENSMUSG00000032047/ENSMUSG00000046598/ENSMUSG00000027875	Ehhadh/L2hgdh/Hadh/Acsm5/Hadha/Abat/Bdh2/Acsm3/Acads/Echs1/Aldh5a1/Aacs/Hmgcl/Acat1/Bdh1/Hmgcs2	mmu:74147/mmu:217666/mmu:15107/mmu:272428/mmu:97212/mmu:268860/mmu:69772/mmu:20216/mmu:11409/mmu:93747/mmu:214579/mmu:78894/mmu:15356/mmu:110446/mmu:71911/mmu:15360	16
mmu01040	Biosynthesis of unsaturated fatty acids	16|997	27|6197	4.02234e-07	6.17429e-06	ENSMUSG00000010651/ENSMUSG00000041220/ENSMUSG00000039653/ENSMUSG00000010663/ENSMUSG00000021364/ENSMUSG00000052392/ENSMUSG00000025745/ENSMUSG00000032349/ENSMUSG00000021226/ENSMUSG00000037071/ENSMUSG00000024665/ENSMUSG00000072949/ENSMUSG00000027195/ENSMUSG00000026189/ENSMUSG00000036138/ENSMUSG00000031708	Acaa1b/Elovl6/Baat/Fads1/Elovl2/Acot4/Hadha/Elovl5/Acot2/Scd1/Fads2/Acot1/Hsd17b12/Pecr/Acaa1a/Tecr	mmu:235674/mmu:170439/mmu:12012/mmu:76267/mmu:54326/mmu:171282/mmu:97212/mmu:68801/mmu:171210/mmu:20249/mmu:56473/mmu:26897/mmu:56348/mmu:111175/mmu:113868/mmu:106529	16
mmu04146	Peroxisome	32|997	83|6197	5.86352e-07	8.57191e-06	ENSMUSG00000022853/ENSMUSG00000010651/ENSMUSG00000028127/ENSMUSG00000039653/ENSMUSG00000055782/ENSMUSG00000036775/ENSMUSG00000030541/ENSMUSG00000024228/ENSMUSG00000029864/ENSMUSG00000027187/ENSMUSG00000025950/ENSMUSG00000024507/ENSMUSG00000027359/ENSMUSG00000027261/ENSMUSG00000027870/ENSMUSG00000020003/ENSMUSG00000022040/ENSMUSG00000022982/ENSMUSG00000019809/ENSMUSG00000024981/ENSMUSG00000053898/…	Ehhadh/Acaa1b/Abcd3/Baat/Abcd2/Decr2/Idh2/Nudt12/Gstk1/Cat/Idh1/Hsd17b4/Slc27a2/Hao1/Hao2/Pex7/Ephx2/Sod1/Pex3/Acsl5/Ech1/Pecr/Dhrs4/Scp2/Acaa1a/Nudt19/Hmgcl/Eci2/Pex11a/Pipox/Phyh/Far1	mmu:74147/mmu:235674/mmu:19299/mmu:12012/mmu:26874/mmu:26378/mmu:269951/mmu:67993/mmu:76263/mmu:12359/mmu:15926/mmu:15488/mmu:26458/mmu:15112/mmu:56185/mmu:18634/mmu:13850/mmu:20655/mmu:56535/mmu:433256/mmu:51798/mmu:111175/mmu:28200/mmu:20280/mmu:113868/mmu:110959/mmu:15356/mmu:23986/mmu:18631/mmu:19193/mmu:16922/mmu:67420	32
mmu04932	Non-alcoholic fatty liver disease (NAFLD)	46|997	141|6197	7.09134e-07	9.89565e-06	ENSMUSG00000026032/ENSMUSG00000030884/ENSMUSG00000021520/ENSMUSG00000009863/ENSMUSG00000026260/ENSMUSG00000025651/ENSMUSG00000017778/ENSMUSG00000005510/ENSMUSG00000025968/ENSMUSG00000038462/ENSMUSG00000021577/ENSMUSG00000041237/ENSMUSG00000064358/ENSMUSG00000031231/ENSMUSG00000000171/ENSMUSG00000061518/ENSMUSG00000052684/ENSMUSG00000013593/ENSMUSG00000025204/ENSMUSG00000022551/ENSMUSG00000040048/…	Ndufb3/Uqcrc2/Uqcrb/Sdhb/Ndufa10/Uqcrc1/Cox7c/Ndufs3/Ndufs1/Uqcrfs1/Sdha/Pklr/mt-Co3/Cox7b/Sdhd/Cox5b/Jun/Ndufs2/Ndufb8/Cyc1/Ndufb10/Mlxipl/Ndufb9/Ndufv1/Ndufa6/Ndufa9/Gsk3b/Ndufv2/Ndufab1/Ndufc2/Pik3cb/mt-Cytb/mt-Co1/Cyp2e1/Ndufa12/Cox6c/Ndufb5/Il1a/Ndufa13/Uqcr10/Ndufa4/Ndufa7/Adipor2/Ndufb6/Ndufs5/Casp8	mmu:66495/mmu:67003/mmu:67530/mmu:67680/mmu:67273/mmu:22273/mmu:12867/mmu:68349/mmu:227197/mmu:66694/mmu:66945/mmu:18770/mmu:17710/mmu:66142/mmu:66925/mmu:12859/mmu:16476/mmu:226646/mmu:67264/mmu:66445/mmu:68342/mmu:58805/mmu:66218/mmu:17995/mmu:67130/mmu:66108/mmu:56637/mmu:72900/mmu:70316/mmu:68197/mmu:74769/mmu:17711/mmu:17708/mmu:13106/mmu:66414/mmu:12864/mmu:66046/mmu:16175/mmu:67184/mmu:661…	46
mmu00630	Glyoxylate and dicarboxylate metabolism	16|997	29|6197	1.51809e-06	2.02632e-05	ENSMUSG00000041650/ENSMUSG00000020321/ENSMUSG00000020534/ENSMUSG00000027187/ENSMUSG00000027261/ENSMUSG00000027870/ENSMUSG00000023921/ENSMUSG00000027605/ENSMUSG00000033429/ENSMUSG00000025176/ENSMUSG00000020664/ENSMUSG00000034424/ENSMUSG00000032047/ENSMUSG00000019179/ENSMUSG00000027452/ENSMUSG00000005683	Pcca/Mdh1/Shmt1/Cat/Hao1/Hao2/Mut/Acss2/Mcee/Hoga1/Dld/Gcsh/Acat1/Mdh2/Acss1/Cs	mmu:110821/mmu:17449/mmu:20425/mmu:12359/mmu:15112/mmu:56185/mmu:17850/mmu:60525/mmu:73724/mmu:67432/mmu:13382/mmu:68133/mmu:110446/mmu:17448/mmu:68738/mmu:12974	16
mmu00010	Glycolysis / Gluconeogenesis	25|997	62|6197	3.8921e-06	4.97865e-05	ENSMUSG00000063524/ENSMUSG00000031299/ENSMUSG00000021748/ENSMUSG00000028307/ENSMUSG00000041237/ENSMUSG00000035473/ENSMUSG00000010025/ENSMUSG00000000628/ENSMUSG00000000168/ENSMUSG00000029455/ENSMUSG00000027605/ENSMUSG00000030695/ENSMUSG00000020664/ENSMUSG00000026687/ENSMUSG00000036427/ENSMUSG00000028692/ENSMUSG00000025791/ENSMUSG00000059040/ENSMUSG00000053644/ENSMUSG00000037012/ENSMUSG00000027452/…	Eno1/Pdha1/Pdhb/Aldob/Pklr/Galm/Aldh3a2/Hk2/Dlat/Aldh2/Acss2/Aldoa/Dld/Aldh9a1/Gpi1/Akr1a1/Pgm2/Eno1b/Aldh7a1/Hk1/Acss1/Pfkp/Adh1/Pck1/Gapdh	mmu:13806/mmu:18597/mmu:68263/mmu:230163/mmu:18770/mmu:319625/mmu:11671/mmu:15277/mmu:235339/mmu:11669/mmu:60525/mmu:11674/mmu:13382/mmu:56752/mmu:14751/mmu:58810/mmu:72157/mmu:433182/mmu:110695/mmu:15275/mmu:68738/mmu:56421/mmu:11522/mmu:18534/mmu:14433	25
mmu00040	Pentose and glucuronate interconversions	16|997	31|6197	4.8768e-06	5.98871e-05	ENSMUSG00000001891/ENSMUSG00000035836/ENSMUSG00000054630/ENSMUSG00000089943/ENSMUSG00000070704/ENSMUSG00000090175/ENSMUSG00000011382/ENSMUSG00000027227/ENSMUSG00000035780/ENSMUSG00000035811/ENSMUSG00000021947/ENSMUSG00000028692/ENSMUSG00000054545/ENSMUSG00000029260/ENSMUSG00000029201/ENSMUSG00000089960	Ugp2/Ugt2b1/Ugt2b5/Ugt1a5/Ugt2b36/Ugt1a9/Dhdh/Sord/Ugt2a3/Ugt2b35/Cryl1/Akr1a1/Ugt1a6a/Ugt2b34/Ugdh/Ugt1a1	mmu:216558/mmu:71773/mmu:22238/mmu:394433/mmu:231396/mmu:394434/mmu:71755/mmu:20322/mmu:72094/mmu:243085/mmu:68631/mmu:58810/mmu:94284/mmu:100727/mmu:22235/mmu:394436	16
mmu04723	Retrograde endocannabinoid signaling	39|997	127|6197	2.46168e-05	0.000289728	ENSMUSG00000019935/ENSMUSG00000026032/ENSMUSG00000026260/ENSMUSG00000064360/ENSMUSG00000005510/ENSMUSG00000025968/ENSMUSG00000064367/ENSMUSG00000064368/ENSMUSG00000013593/ENSMUSG00000025204/ENSMUSG00000040048/ENSMUSG00000033174/ENSMUSG00000022354/ENSMUSG00000037916/ENSMUSG00000022450/ENSMUSG00000000399/ENSMUSG00000065947/ENSMUSG00000024099/ENSMUSG00000030869/ENSMUSG00000030647/ENSMUSG00000029663/…	Slc17a8/Ndufb3/Ndufa10/mt-Nd3/Ndufs3/Ndufs1/mt-Nd5/mt-Nd6/Ndufs2/Ndufb8/Ndufb10/Mgll/Ndufb9/Ndufv1/Ndufa6/Ndufa9/mt-Nd4l/Ndufv2/Ndufab1/Ndufc2/Gngt1/Ndufa12/Mapk12/Ndufb5/Ndufa13/Ndufa4/Ndufa7/mt-Nd4/Itpr3/Faah/Gabra3/Adcy5/Ndufb6/Mapk11/Ndufs5/Gabrq/Gng12/Cacna1c/Abhd6	mmu:216227/mmu:66495/mmu:67273/mmu:17718/mmu:68349/mmu:227197/mmu:17721/mmu:17722/mmu:226646/mmu:67264/mmu:68342/mmu:23945/mmu:66218/mmu:17995/mmu:67130/mmu:66108/mmu:17720/mmu:72900/mmu:70316/mmu:68197/mmu:14699/mmu:66414/mmu:29857/mmu:66046/mmu:67184/mmu:17992/mmu:66416/mmu:17719/mmu:16440/mmu:14073/mmu:14396/mmu:224129/mmu:230075/mmu:19094/mmu:595136/mmu:57249/mmu:14701/mmu:12288/mmu:66082	39
mmu00140	Steroid hormone biosynthesis	26|997	72|6197	2.62614e-05	0.000289728	ENSMUSG00000032808/ENSMUSG00000038641/ENSMUSG00000035836/ENSMUSG00000054630/ENSMUSG00000089943/ENSMUSG00000070704/ENSMUSG00000090175/ENSMUSG00000056035/ENSMUSG00000035780/ENSMUSG00000035811/ENSMUSG00000016194/ENSMUSG00000021594/ENSMUSG00000040583/ENSMUSG00000027195/ENSMUSG00000029630/ENSMUSG00000025396/ENSMUSG00000025479/ENSMUSG00000042248/ENSMUSG00000074882/ENSMUSG00000054545/ENSMUSG00000029260/…	Cyp2c38/Akr1d1/Ugt2b1/Ugt2b5/Ugt1a5/Ugt2b36/Ugt1a9/Cyp3a11/Ugt2a3/Ugt2b35/Hsd11b1/Srd5a1/Cyp2b13/Hsd17b12/Cyp3a25/Hsd17b6/Cyp2e1/Cyp2c37/Cyp2c68/Ugt1a6a/Ugt2b34/Cyp2c50/Akr1c18/Ugt1a1/Cyp1b1/Cyp2b9	mmu:13097/mmu:208665/mmu:71773/mmu:22238/mmu:394433/mmu:231396/mmu:394434/mmu:13112/mmu:72094/mmu:243085/mmu:15483/mmu:78925/mmu:13089/mmu:56348/mmu:56388/mmu:27400/mmu:13106/mmu:13096/mmu:433247/mmu:94284/mmu:100727/mmu:107141/mmu:105349/mmu:394436/mmu:13078/mmu:13094	26
mmu00410	beta-Alanine metabolism	15|997	31|6197	2.64247e-05	0.000289728	ENSMUSG00000062908/ENSMUSG00000022853/ENSMUSG00000021238/ENSMUSG00000010025/ENSMUSG00000029455/ENSMUSG00000025745/ENSMUSG00000057880/ENSMUSG00000041426/ENSMUSG00000022304/ENSMUSG00000025465/ENSMUSG00000033308/ENSMUSG00000026687/ENSMUSG00000053644/ENSMUSG00000027333/ENSMUSG00000033427	Acadm/Ehhadh/Aldh6a1/Aldh3a2/Aldh2/Hadha/Abat/Hibch/Dpys/Echs1/Dpyd/Aldh9a1/Aldh7a1/Smox/Upb1	mmu:11364/mmu:74147/mmu:104776/mmu:11671/mmu:11669/mmu:97212/mmu:268860/mmu:227095/mmu:64705/mmu:93747/mmu:99586/mmu:56752/mmu:110695/mmu:228608/mmu:103149	15
mmu00480	Glutathione metabolism	23|997	62|6197	4.66198e-05	0.000493527	ENSMUSG00000058135/ENSMUSG00000025934/ENSMUSG00000032348/ENSMUSG00000033318/ENSMUSG00000001663/ENSMUSG00000001665/ENSMUSG00000026688/ENSMUSG00000057933/ENSMUSG00000004038/ENSMUSG00000025068/ENSMUSG00000030541/ENSMUSG00000029864/ENSMUSG00000025950/ENSMUSG00000068762/ENSMUSG00000074183/ENSMUSG00000075706/ENSMUSG00000027890/ENSMUSG00000020649/ENSMUSG00000029919/ENSMUSG00000089694/ENSMUSG00000040562/…	Gstm1/Gsta3/Gsta4/Gstt2/Gstt1/Gstt3/Mgst3/Gsta2/Gstm3/Gsto1/Idh2/Gstk1/Idh1/Gstm6/Gsta1/Gpx4/Gstm4/Rrm2/Hpgds/Nat8f7/Gstm2/Gpx8/Gpx6	mmu:14862/mmu:14859/mmu:14860/mmu:14872/mmu:14871/mmu:103140/mmu:66447/mmu:14858/mmu:14864/mmu:14873/mmu:269951/mmu:76263/mmu:15926/mmu:14867/mmu:14857/mmu:625249/mmu:14865/mmu:20135/mmu:54486/mmu:100043497/mmu:14863/mmu:69590/mmu:75512	23
mmu00380	Tryptophan metabolism	17|997	40|6197	6.26914e-05	0.000641542	ENSMUSG00000003477/ENSMUSG00000022853/ENSMUSG00000040147/ENSMUSG00000010025/ENSMUSG00000027984/ENSMUSG00000027187/ENSMUSG00000029455/ENSMUSG00000025745/ENSMUSG00000057228/ENSMUSG00000003809/ENSMUSG00000025465/ENSMUSG00000026687/ENSMUSG00000063558/ENSMUSG00000032047/ENSMUSG00000053644/ENSMUSG00000020456/ENSMUSG00000024087	Inmt/Ehhadh/Maob/Aldh3a2/Hadh/Cat/Aldh2/Hadha/Aadat/Gcdh/Echs1/Aldh9a1/Aox1/Acat1/Aldh7a1/Ogdh/Cyp1b1	mmu:21743/mmu:74147/mmu:109731/mmu:11671/mmu:15107/mmu:12359/mmu:11669/mmu:97212/mmu:23923/mmu:270076/mmu:93747/mmu:56752/mmu:11761/mmu:110446/mmu:110695/mmu:18293/mmu:13078	17
mmu01230	Biosynthesis of amino acids	24|997	71|6197	0.000176507	0.00174799	ENSMUSG00000031173/ENSMUSG00000063524/ENSMUSG00000031700/ENSMUSG00000021957/ENSMUSG00000027406/ENSMUSG00000028307/ENSMUSG00000041237/ENSMUSG00000025533/ENSMUSG00000037798/ENSMUSG00000030541/ENSMUSG00000053604/ENSMUSG00000002010/ENSMUSG00000020534/ENSMUSG00000025950/ENSMUSG00000020051/ENSMUSG00000030695/ENSMUSG00000025991/ENSMUSG00000025503/ENSMUSG00000059040/ENSMUSG00000022546/ENSMUSG00000021196/…	Otc/Eno1/Gpt2/Tkt/Idh3b/Aldob/Pklr/Asl/Mat1a/Idh2/Rpia/Idh3g/Shmt1/Idh1/Pah/Aldoa/Cps1/Taldo1/Eno1b/Gpt/Pfkp/Gapdh/Got1/Cs	mmu:18416/mmu:13806/mmu:108682/mmu:21881/mmu:170718/mmu:230163/mmu:18770/mmu:109900/mmu:11720/mmu:269951/mmu:19895/mmu:15929/mmu:20425/mmu:15926/mmu:18478/mmu:11674/mmu:227231/mmu:21351/mmu:433182/mmu:76282/mmu:56421/mmu:14433/mmu:14718/mmu:12974	24
mmu03320	PPAR signaling pathway	25|997	77|6197	0.000267437	0.00253131	ENSMUSG00000017754/ENSMUSG00000032418/ENSMUSG00000062908/ENSMUSG00000022853/ENSMUSG00000023057/ENSMUSG00000010651/ENSMUSG00000000440/ENSMUSG00000026003/ENSMUSG00000050445/ENSMUSG00000005681/ENSMUSG00000054422/ENSMUSG00000027359/ENSMUSG00000024900/ENSMUSG00000028494/ENSMUSG00000066071/ENSMUSG00000002944/ENSMUSG00000037071/ENSMUSG00000024665/ENSMUSG00000024981/ENSMUSG00000028603/ENSMUSG00000036138/…	Pltp/Me1/Acadm/Ehhadh/Fabp2/Acaa1b/Pparg/Acadl/Cyp8b1/Apoa2/Fabp1/Slc27a2/Cpt1a/Plin2/Cyp4a12a/Cd36/Scd1/Fads2/Acsl5/Scp2/Acaa1a/Ubc/Dbi/Hmgcs2/Pck1	mmu:18830/mmu:17436/mmu:11364/mmu:74147/mmu:14079/mmu:235674/mmu:19016/mmu:11363/mmu:13124/mmu:11807/mmu:14080/mmu:26458/mmu:12894/mmu:11520/mmu:277753/mmu:12491/mmu:20249/mmu:56473/mmu:433256/mmu:20280/mmu:113868/mmu:22190/mmu:13167/mmu:15360/mmu:18534	25
mmu01210	2-Oxocarboxylic acid metabolism	9|997	16|6197	0.000272095	0.00253131	ENSMUSG00000031700/ENSMUSG00000027406/ENSMUSG00000030541/ENSMUSG00000002010/ENSMUSG00000025950/ENSMUSG00000057228/ENSMUSG00000022546/ENSMUSG00000025190/ENSMUSG00000005683	Gpt2/Idh3b/Idh2/Idh3g/Idh1/Aadat/Gpt/Got1/Cs	mmu:108682/mmu:170718/mmu:269951/mmu:15929/mmu:15926/mmu:23923/mmu:76282/mmu:14718/mmu:12974	9
mmu05418	Fluid shear stress and atherosclerosis	38|997	137|6197	0.000337072	0.00304356	ENSMUSG00000058135/ENSMUSG00000025934/ENSMUSG00000032348/ENSMUSG00000033318/ENSMUSG00000001663/ENSMUSG00000001665/ENSMUSG00000015839/ENSMUSG00000031740/ENSMUSG00000026688/ENSMUSG00000057933/ENSMUSG00000005583/ENSMUSG00000004038/ENSMUSG00000025068/ENSMUSG00000025199/ENSMUSG00000028978/ENSMUSG00000052684/ENSMUSG00000030557/ENSMUSG00000068762/ENSMUSG00000074183/ENSMUSG00000027890/ENSMUSG00000015837/…	Gstm1/Gsta3/Gsta4/Gstt2/Gstt1/Gstt3/Nfe2l2/Mmp2/Mgst3/Gsta2/Mef2c/Gstm3/Gsto1/Chuk/Nos3/Jun/Mef2a/Gstm6/Gsta1/Gstm4/Sqstm1/Bmp4/Fos/Thbd/Pik3cb/Mapk12/Il1a/Bmpr2/Pecam1/Nqo1/Gstm2/Trp53/Mapk11/Klf2/Src/Vegfa/Ccl2/Plat	mmu:14862/mmu:14859/mmu:14860/mmu:14872/mmu:14871/mmu:103140/mmu:18024/mmu:17390/mmu:66447/mmu:14858/mmu:17260/mmu:14864/mmu:14873/mmu:12675/mmu:18127/mmu:16476/mmu:17258/mmu:14867/mmu:14857/mmu:14865/mmu:18412/mmu:12159/mmu:14281/mmu:21824/mmu:74769/mmu:29857/mmu:16175/mmu:12168/mmu:18613/mmu:18104/mmu:14863/mmu:22059/mmu:19094/mmu:16598/mmu:20779/mmu:22339/mmu:20296/mmu:18791	38
mmu00062	Fatty acid elongation	13|997	31|6197	0.000537463	0.00471432	ENSMUSG00000041220/ENSMUSG00000059447/ENSMUSG00000021364/ENSMUSG00000027984/ENSMUSG00000052392/ENSMUSG00000025745/ENSMUSG00000032349/ENSMUSG00000021226/ENSMUSG00000036880/ENSMUSG00000072949/ENSMUSG00000027195/ENSMUSG00000025465/ENSMUSG00000031708	Elovl6/Hadhb/Elovl2/Hadh/Acot4/Hadha/Elovl5/Acot2/Acaa2/Acot1/Hsd17b12/Echs1/Tecr	mmu:170439/mmu:231086/mmu:54326/mmu:15107/mmu:171282/mmu:97212/mmu:68801/mmu:171210/mmu:52538/mmu:26897/mmu:56348/mmu:93747/mmu:106529	13
mmu00500	Starch and sucrose metabolism	12|997	28|6197	0.000693651	0.0059153	ENSMUSG00000001891/ENSMUSG00000030244/ENSMUSG00000074264/ENSMUSG00000000628/ENSMUSG00000021069/ENSMUSG00000022707/ENSMUSG00000032648/ENSMUSG00000036427/ENSMUSG00000025791/ENSMUSG00000030729/ENSMUSG00000037012/ENSMUSG00000033400	Ugp2/Gys2/Amy1/Hk2/Pygl/Gbe1/Pygm/Gpi1/Pgm2/Pgm2l1/Hk1/Agl	mmu:216558/mmu:232493/mmu:11722/mmu:15277/mmu:110095/mmu:74185/mmu:19309/mmu:14751/mmu:72157/mmu:70974/mmu:15275/mmu:77559	12
mmu00220	Arginine biosynthesis	9|997	19|6197	0.0013891	0.0115258	ENSMUSG00000031173/ENSMUSG00000031700/ENSMUSG00000025533/ENSMUSG00000028978/ENSMUSG00000025991/ENSMUSG00000044005/ENSMUSG00000022546/ENSMUSG00000026103/ENSMUSG00000025190	Otc/Gpt2/Asl/Nos3/Cps1/Gls2/Gpt/Gls/Got1	mmu:18416/mmu:108682/mmu:109900/mmu:18127/mmu:227231/mmu:216456/mmu:76282/mmu:14660/mmu:14718	9
mmu00561	Glycerolipid metabolism	17|997	54|6197	0.00358096	0.0289304	ENSMUSG00000025509/ENSMUSG00000010025/ENSMUSG00000029455/ENSMUSG00000033174/ENSMUSG00000046338/ENSMUSG00000024052/ENSMUSG00000032207/ENSMUSG00000026687/ENSMUSG00000012187/ENSMUSG00000031545/ENSMUSG00000041653/ENSMUSG00000023827/ENSMUSG00000028692/ENSMUSG00000053846/ENSMUSG00000053644/ENSMUSG00000024978/ENSMUSG00000022555	Pnpla2/Aldh3a2/Aldh2/Mgll/Gpat2/Lpin2/Lipc/Aldh9a1/Mogat1/Gpat4/Pnpla3/Agpat4/Akr1a1/Lipg/Aldh7a1/Gpam/Dgat1	mmu:66853/mmu:11671/mmu:11669/mmu:23945/mmu:215456/mmu:64898/mmu:15450/mmu:56752/mmu:68393/mmu:102247/mmu:116939/mmu:68262/mmu:58810/mmu:16891/mmu:110695/mmu:14732/mmu:13350	17
mmu00860	Porphyrin and chlorophyll metabolism	13|997	39|6197	0.00606232	0.0477214	ENSMUSG00000035836/ENSMUSG00000054630/ENSMUSG00000089943/ENSMUSG00000070704/ENSMUSG00000090175/ENSMUSG00000031209/ENSMUSG00000035780/ENSMUSG00000035811/ENSMUSG00000024588/ENSMUSG00000031352/ENSMUSG00000054545/ENSMUSG00000029260/ENSMUSG00000089960	Ugt2b1/Ugt2b5/Ugt1a5/Ugt2b36/Ugt1a9/Heph/Ugt2a3/Ugt2b35/Fech/Hccs/Ugt1a6a/Ugt2b34/Ugt1a1	mmu:71773/mmu:22238/mmu:394433/mmu:231396/mmu:394434/mmu:15203/mmu:72094/mmu:243085/mmu:14151/mmu:15159/mmu:94284/mmu:100727/mmu:394436	13

## Sheet: iWAT KEGG WT Up
KEGGID	Description	GeneRatio	BgRatio	pvalue	padj	geneID	geneName	keggID	Count

## Sheet: iWAT KEGG WT Down
KEGGID	Description	GeneRatio	BgRatio	pvalue	padj	geneID	geneName	keggID	Count
mmu04510	Focal adhesion	35|403	195|6467	8.09975e-09	2.32463e-06	ENSMUSG00000043719/ENSMUSG00000048126/ENSMUSG00000025856/ENSMUSG00000062960/ENSMUSG00000070348/ENSMUSG00000027111/ENSMUSG00000026840/ENSMUSG00000020241/ENSMUSG00000078816/ENSMUSG00000021702/ENSMUSG00000001119/ENSMUSG00000031274/ENSMUSG00000028364/ENSMUSG00000062825/ENSMUSG00000029648/ENSMUSG00000001506/ENSMUSG00000029661/ENSMUSG00000073557/ENSMUSG00000052684/ENSMUSG00000031955/ENSMUSG00000024620/…	Col6a6/Col6a3/Pdgfa/Kdr/Ccnd1/Itga6/Lamc3/Col6a2/Prkcg/Thbs4/Col6a1/Col4a5/Tnc/Actg1/Flt1/Col1a1/Col1a2/Ppp1r12b/Jun/Bcar1/Pdgfrb/Ccnd2/Flnc/Pdgfb/Vegfa/Flnb/Lama2/Dock1/Itga5/Cdc42/Col4a4/Mapk3/Arhgap35/Shc4/Itga8	mmu:245026/mmu:12835/mmu:18590/mmu:16542/mmu:12443/mmu:16403/mmu:23928/mmu:12834/mmu:18752/mmu:21828/mmu:12833/mmu:12830/mmu:21923/mmu:11465/mmu:14254/mmu:12842/mmu:12843/mmu:329251/mmu:16476/mmu:12927/mmu:18596/mmu:12444/mmu:68794/mmu:18591/mmu:22339/mmu:286940/mmu:16773/mmu:330662/mmu:16402/mmu:12540/mmu:12829/mmu:26417/mmu:232906/mmu:271849/mmu:241226	35
mmu04974	Protein digestion and absorption	17|403	76|6467	2.90521e-06	0.000301207	ENSMUSG00000007107/ENSMUSG00000043719/ENSMUSG00000048126/ENSMUSG00000028339/ENSMUSG00000026043/ENSMUSG00000020241/ENSMUSG00000004098/ENSMUSG00000041329/ENSMUSG00000071553/ENSMUSG00000001435/ENSMUSG00000001119/ENSMUSG00000031274/ENSMUSG00000026837/ENSMUSG00000001506/ENSMUSG00000024935/ENSMUSG00000029661/ENSMUSG00000067158	Atp1a4/Col6a6/Col6a3/Col15a1/Col3a1/Col6a2/Col5a3/Atp1b2/Cpa2/Col18a1/Col6a1/Col4a5/Col5a1/Col1a1/Slc1a1/Col1a2/Col4a4	mmu:27222/mmu:245026/mmu:12835/mmu:12819/mmu:12825/mmu:12834/mmu:53867/mmu:11932/mmu:232680/mmu:12822/mmu:12833/mmu:12830/mmu:12831/mmu:12842/mmu:20510/mmu:12843/mmu:12829	17
mmu05200	Pathways in cancer	57|403	497|6467	3.14851e-06	0.000301207	ENSMUSG00000020826/ENSMUSG00000005413/ENSMUSG00000025856/ENSMUSG00000070348/ENSMUSG00000032766/ENSMUSG00000027111/ENSMUSG00000017716/ENSMUSG00000026821/ENSMUSG00000026840/ENSMUSG00000032744/ENSMUSG00000025231/ENSMUSG00000022528/ENSMUSG00000048701/ENSMUSG00000020431/ENSMUSG00000021974/ENSMUSG00000078816/ENSMUSG00000024617/ENSMUSG00000021109/ENSMUSG00000002799/ENSMUSG00000030110/ENSMUSG00000031274/…	Nos2/Hmox1/Pdgfa/Ccnd1/Gng11/Itga6/Birc5/Ralgds/Lamc3/Heyl/Sufu/Hes1/Ccdc6/Adcy1/Fgf9/Prkcg/Camk2a/Hif1a/Jag2/Ret/Col4a5/Fzd9/F2rl3/Cks2/Fgf1/Dll4/Ptch2/Tgfb2/Apc2/Jun/Nqo1/Igf2/Pdgfrb/Ccnd2/Pdgfb/Hey1/Vegfa/E2f3/Ikbkg/Lama2/Smad2/Fzd6/Tfg/Ppard/Gstp2/Il4/Calm3/Cdc42/Notch3/Col4a4/Jag1/Stat5a/Mapk3/Txnrd1/Arhgef11/Ifngr2/Gng5	mmu:18126/mmu:15368/mmu:18590/mmu:12443/mmu:66066/mmu:16403/mmu:11799/mmu:19730/mmu:23928/mmu:56198/mmu:24069/mmu:15205/mmu:76551/mmu:432530/mmu:14180/mmu:18752/mmu:12322/mmu:15251/mmu:16450/mmu:19713/mmu:12830/mmu:14371/mmu:14065/mmu:66197/mmu:14164/mmu:54485/mmu:19207/mmu:21808/mmu:23805/mmu:16476/mmu:18104/mmu:16002/mmu:18596/mmu:12444/mmu:18591/mmu:15213/mmu:22339/mmu:13557/mmu:16151/mmu:1677…	57
mmu04512	ECM-receptor interaction	17|403	81|6467	7.30924e-06	0.000524438	ENSMUSG00000043719/ENSMUSG00000048126/ENSMUSG00000027111/ENSMUSG00000026840/ENSMUSG00000020241/ENSMUSG00000021702/ENSMUSG00000001119/ENSMUSG00000031274/ENSMUSG00000028364/ENSMUSG00000001506/ENSMUSG00000029661/ENSMUSG00000028763/ENSMUSG00000020330/ENSMUSG00000019899/ENSMUSG00000000555/ENSMUSG00000067158/ENSMUSG00000026768	Col6a6/Col6a3/Itga6/Lamc3/Col6a2/Thbs4/Col6a1/Col4a5/Tnc/Col1a1/Col1a2/Hspg2/Hmmr/Lama2/Itga5/Col4a4/Itga8	mmu:245026/mmu:12835/mmu:16403/mmu:23928/mmu:12834/mmu:21828/mmu:12833/mmu:12830/mmu:21923/mmu:12842/mmu:12843/mmu:15530/mmu:15366/mmu:16773/mmu:16402/mmu:12829/mmu:241226	17
mmu05205	Proteoglycans in cancer	28|403	196|6467	2.71073e-05	0.00155596	ENSMUSG00000062960/ENSMUSG00000070348/ENSMUSG00000034220/ENSMUSG00000036446/ENSMUSG00000078816/ENSMUSG00000024617/ENSMUSG00000021109/ENSMUSG00000021822/ENSMUSG00000049551/ENSMUSG00000062825/ENSMUSG00000001506/ENSMUSG00000020044/ENSMUSG00000039239/ENSMUSG00000029661/ENSMUSG00000028763/ENSMUSG00000073557/ENSMUSG00000022261/ENSMUSG00000022610/ENSMUSG00000048583/ENSMUSG00000068699/ENSMUSG00000023951/…	Kdr/Ccnd1/Gpc1/Lum/Prkcg/Camk2a/Hif1a/Plau/Fzd9/Actg1/Col1a1/Timp3/Tgfb2/Col1a2/Hspg2/Ppp1r12b/Sdc2/Mapk12/Igf2/Flnc/Vegfa/Ank3/Flnb/Itga5/Smad2/Fzd6/Cdc42/Mapk3	mmu:16542/mmu:12443/mmu:14733/mmu:17022/mmu:18752/mmu:12322/mmu:15251/mmu:18792/mmu:14371/mmu:11465/mmu:12842/mmu:21859/mmu:21808/mmu:12843/mmu:15530/mmu:329251/mmu:15529/mmu:29857/mmu:16002/mmu:68794/mmu:22339/mmu:11735/mmu:286940/mmu:16402/mmu:17126/mmu:14368/mmu:12540/mmu:26417	28
mmu00100	Steroid biosynthesis	7|403	19|6467	9.06107e-05	0.00402201	ENSMUSG00000034926/ENSMUSG00000001467/ENSMUSG00000058454/ENSMUSG00000022351/ENSMUSG00000031349/ENSMUSG00000033105/ENSMUSG00000026675	Dhcr24/Cyp51/Dhcr7/Sqle/Nsdhl/Lss/Hsd17b7	mmu:74754/mmu:13121/mmu:13360/mmu:20775/mmu:18194/mmu:16987/mmu:15490	7
mmu04151	PI3K-Akt signaling pathway	38|403	324|6467	9.80977e-05	0.00402201	ENSMUSG00000043719/ENSMUSG00000048126/ENSMUSG00000025856/ENSMUSG00000062960/ENSMUSG00000070348/ENSMUSG00000032766/ENSMUSG00000027111/ENSMUSG00000026840/ENSMUSG00000020241/ENSMUSG00000018965/ENSMUSG00000021974/ENSMUSG00000021702/ENSMUSG00000001119/ENSMUSG00000031274/ENSMUSG00000028364/ENSMUSG00000030244/ENSMUSG00000029648/ENSMUSG00000036585/ENSMUSG00000001506/ENSMUSG00000029661/ENSMUSG00000006445/…	Col6a6/Col6a3/Pdgfa/Kdr/Ccnd1/Gng11/Itga6/Lamc3/Col6a2/Ywhah/Fgf9/Thbs4/Col6a1/Col4a5/Tnc/Gys2/Flt1/Fgf1/Col1a1/Col1a2/Epha2/Sgk1/Igf2/Pdgfrb/Ccnd2/Pdgfb/Vegfa/Angpt2/Ikbkg/Lama2/Itga5/Il4/Col4a4/Mapk3/Tsc2/Itga8/Ppp2r1a/Gng5	mmu:245026/mmu:12835/mmu:18590/mmu:16542/mmu:12443/mmu:66066/mmu:16403/mmu:23928/mmu:12834/mmu:22629/mmu:14180/mmu:21828/mmu:12833/mmu:12830/mmu:21923/mmu:232493/mmu:14254/mmu:14164/mmu:12842/mmu:12843/mmu:13836/mmu:20393/mmu:16002/mmu:18596/mmu:12444/mmu:18591/mmu:22339/mmu:11601/mmu:16151/mmu:16773/mmu:16402/mmu:16189/mmu:12829/mmu:26417/mmu:22084/mmu:241226/mmu:51792/mmu:14707	38
mmu05206	MicroRNAs in cancer	21|403	139|6467	0.000123541	0.00443203	ENSMUSG00000028832/ENSMUSG00000005413/ENSMUSG00000025856/ENSMUSG00000070348/ENSMUSG00000078816/ENSMUSG00000021822/ENSMUSG00000028364/ENSMUSG00000020044/ENSMUSG00000039239/ENSMUSG00000023088/ENSMUSG00000020135/ENSMUSG00000020661/ENSMUSG00000024620/ENSMUSG00000000184/ENSMUSG00000000489/ENSMUSG00000023951/ENSMUSG00000016477/ENSMUSG00000000555/ENSMUSG00000044201/ENSMUSG00000038146/ENSMUSG00000035109	Stmn1/Hmox1/Pdgfa/Ccnd1/Prkcg/Plau/Tnc/Timp3/Tgfb2/Abcc1/Apc2/Dnmt3a/Pdgfrb/Ccnd2/Pdgfb/Vegfa/E2f3/Itga5/Cdc25c/Notch3/Shc4	mmu:16765/mmu:15368/mmu:18590/mmu:12443/mmu:18752/mmu:18792/mmu:21923/mmu:21859/mmu:21808/mmu:17250/mmu:23805/mmu:13435/mmu:18596/mmu:12444/mmu:18591/mmu:22339/mmu:13557/mmu:16402/mmu:12532/mmu:18131/mmu:271849	21
mmu04014	Ras signaling pathway	27|403	217|6467	0.000400742	0.0127792	ENSMUSG00000022895/ENSMUSG00000025856/ENSMUSG00000062960/ENSMUSG00000032766/ENSMUSG00000026821/ENSMUSG00000021974/ENSMUSG00000078816/ENSMUSG00000018334/ENSMUSG00000029648/ENSMUSG00000036585/ENSMUSG00000006445/ENSMUSG00000048583/ENSMUSG00000004508/ENSMUSG00000024620/ENSMUSG00000041193/ENSMUSG00000000489/ENSMUSG00000023951/ENSMUSG00000031465/ENSMUSG00000004221/ENSMUSG00000028751/ENSMUSG00000042632/…	Ets2/Pdgfa/Kdr/Gng11/Ralgds/Fgf9/Prkcg/Ksr1/Flt1/Fgf1/Epha2/Igf2/Gab2/Pdgfrb/Pla2g5/Pdgfb/Vegfa/Angpt2/Ikbkg/Pla2g2e/Pla2g6/Calm3/Cdc42/Pla2g4e/Mapk3/Shc4/Gng5	mmu:23872/mmu:18590/mmu:16542/mmu:66066/mmu:19730/mmu:14180/mmu:18752/mmu:16706/mmu:14254/mmu:14164/mmu:13836/mmu:16002/mmu:14389/mmu:18596/mmu:18784/mmu:18591/mmu:22339/mmu:11601/mmu:16151/mmu:26970/mmu:53357/mmu:12315/mmu:12540/mmu:329502/mmu:26417/mmu:271849/mmu:14707	27
mmu05144	Malaria	10|403	47|6467	0.000508723	0.0146003	ENSMUSG00000035385/ENSMUSG00000069919/ENSMUSG00000069917/ENSMUSG00000021702/ENSMUSG00000073940/ENSMUSG00000039239/ENSMUSG00000022261/ENSMUSG00000052305/ENSMUSG00000037706/ENSMUSG00000090523	Ccl2/Hba-a1/Hba-a2/Thbs4/Hbb-bt/Tgfb2/Sdc2/Hbb-bs/Cd81/Gypc	mmu:20296/mmu:15122/mmu:110257/mmu:21828/mmu:101488143/mmu:21808/mmu:15529/mmu:100503605/mmu:12520/mmu:71683	10
mmu04010	MAPK signaling pathway	32|403	285|6467	0.000760176	0.0198337	ENSMUSG00000024190/ENSMUSG00000028832/ENSMUSG00000026074/ENSMUSG00000025856/ENSMUSG00000062960/ENSMUSG00000037887/ENSMUSG00000021974/ENSMUSG00000078816/ENSMUSG00000031530/ENSMUSG00000020623/ENSMUSG00000029648/ENSMUSG00000036585/ENSMUSG00000039239/ENSMUSG00000052684/ENSMUSG00000006445/ENSMUSG00000022610/ENSMUSG00000048583/ENSMUSG00000024620/ENSMUSG00000068699/ENSMUSG00000000489/ENSMUSG00000032577/…	Dusp1/Stmn1/Map4k4/Pdgfa/Kdr/Dusp8/Fgf9/Prkcg/Dusp4/Map2k6/Flt1/Fgf1/Tgfb2/Jun/Epha2/Mapk12/Igf2/Pdgfrb/Flnc/Pdgfb/Mapkapk3/Vegfa/Angpt2/Mapt/Ikbkg/Flnb/Rapgef2/Cdc42/Pla2g4e/Mapkapk2/Mapk3/Cacna1c	mmu:19252/mmu:16765/mmu:26921/mmu:18590/mmu:16542/mmu:18218/mmu:14180/mmu:18752/mmu:319520/mmu:26399/mmu:14254/mmu:14164/mmu:21808/mmu:16476/mmu:13836/mmu:29857/mmu:16002/mmu:18596/mmu:68794/mmu:18591/mmu:102626/mmu:22339/mmu:11601/mmu:17762/mmu:16151/mmu:286940/mmu:76089/mmu:12540/mmu:329502/mmu:17164/mmu:26417/mmu:12288	32
mmu04933	AGE-RAGE signaling pathway in diabetic complications	15|403	99|6467	0.00109787	0.0262575	ENSMUSG00000035385/ENSMUSG00000070348/ENSMUSG00000026043/ENSMUSG00000031274/ENSMUSG00000001506/ENSMUSG00000039239/ENSMUSG00000029661/ENSMUSG00000052684/ENSMUSG00000022610/ENSMUSG00000023951/ENSMUSG00000024563/ENSMUSG00000006699/ENSMUSG00000067158/ENSMUSG00000004043/ENSMUSG00000063065	Ccl2/Ccnd1/Col3a1/Col4a5/Col1a1/Tgfb2/Col1a2/Jun/Mapk12/Vegfa/Smad2/Cdc42/Col4a4/Stat5a/Mapk3	mmu:20296/mmu:12443/mmu:12825/mmu:12830/mmu:12842/mmu:21808/mmu:12843/mmu:16476/mmu:29857/mmu:22339/mmu:17126/mmu:12540/mmu:12829/mmu:20850/mmu:26417	15
mmu04360	Axon guidance	21|403	170|6467	0.00190404	0.0420353	ENSMUSG00000020099/ENSMUSG00000001300/ENSMUSG00000029869/ENSMUSG00000025876/ENSMUSG00000024617/ENSMUSG00000031558/ENSMUSG00000038264/ENSMUSG00000026121/ENSMUSG00000066877/ENSMUSG00000006445/ENSMUSG00000052133/ENSMUSG00000022048/ENSMUSG00000027716/ENSMUSG00000030084/ENSMUSG00000032537/ENSMUSG00000027748/ENSMUSG00000006699/ENSMUSG00000019647/ENSMUSG00000026235/ENSMUSG00000063065/ENSMUSG00000057969	Unc5b/Efnb2/Ephb6/Unc5a/Camk2a/Slit2/Sema7a/Sema4c/Nck2/Epha2/Sema5b/Dpysl2/Trpc3/Plxna1/Ephb1/Trpc4/Cdc42/Sema6a/Epha4/Mapk3/Sema3b	mmu:107449/mmu:13642/mmu:13848/mmu:107448/mmu:12322/mmu:20563/mmu:20361/mmu:20353/mmu:17974/mmu:13836/mmu:20357/mmu:12934/mmu:22065/mmu:18844/mmu:270190/mmu:22066/mmu:12540/mmu:20358/mmu:13838/mmu:26417/mmu:20347	21
mmu05418	Fluid shear stress and atherosclerosis	18|403	139|6467	0.00233487	0.0478648	ENSMUSG00000035385/ENSMUSG00000024190/ENSMUSG00000005413/ENSMUSG00000025856/ENSMUSG00000062960/ENSMUSG00000034220/ENSMUSG00000020623/ENSMUSG00000062825/ENSMUSG00000052684/ENSMUSG00000031871/ENSMUSG00000022261/ENSMUSG00000022610/ENSMUSG00000003849/ENSMUSG00000000489/ENSMUSG00000023951/ENSMUSG00000004221/ENSMUSG00000038155/ENSMUSG00000019370	Ccl2/Dusp1/Hmox1/Pdgfa/Kdr/Gpc1/Map2k6/Actg1/Jun/Cdh5/Sdc2/Mapk12/Nqo1/Pdgfb/Vegfa/Ikbkg/Gstp2/Calm3	mmu:20296/mmu:19252/mmu:15368/mmu:18590/mmu:16542/mmu:14733/mmu:26399/mmu:11465/mmu:16476/mmu:12562/mmu:15529/mmu:29857/mmu:18104/mmu:18591/mmu:22339/mmu:16151/mmu:14869/mmu:12315	18

## Sheet: Hypothalamus KEGG WT Down
KEGGID	Description	GeneRatio	BgRatio	pvalue	padj	geneID	geneName	keggID	Count
mmu05012	Parkinson disease	24|231	140|6597	6.22454e-11	1.41919e-08	ENSMUSG00000039904/ENSMUSG00000023089/ENSMUSG00000025204/ENSMUSG00000063694/ENSMUSG00000017778/ENSMUSG00000021606/ENSMUSG00000031059/ENSMUSG00000061518/ENSMUSG00000071014/ENSMUSG00000044894/ENSMUSG00000031818/ENSMUSG00000024099/ENSMUSG00000031628/ENSMUSG00000064354/ENSMUSG00000037916/ENSMUSG00000034566/ENSMUSG00000028648/ENSMUSG00000024038/ENSMUSG00000028964/ENSMUSG00000036751/ENSMUSG00000031231/…	Gpr37/Ndufa5/Ndufb8/Cycs/Cox7c/Ndufs6/Ndufb11/Cox5b/Ndufb6/Uqcrq/Cox4i1/Ndufv2/Casp3/mt-Co2/Ndufv1/Atp5h/Ndufs5/Ndufv3/Park7/Cox6b1/Cox7b/Ndufb10/Cyc1/Snca	mmu:14763/mmu:68202/mmu:67264/mmu:13063/mmu:12867/mmu:407785/mmu:104130/mmu:12859/mmu:230075/mmu:22272/mmu:12857/mmu:72900/mmu:12367/mmu:17709/mmu:17995/mmu:71679/mmu:595136/mmu:78330/mmu:57320/mmu:110323/mmu:66142/mmu:68342/mmu:66445/mmu:20617	24
mmu05010	Alzheimer disease	25|231	169|6597	6.4511e-10	7.35425e-08	ENSMUSG00000023089/ENSMUSG00000025204/ENSMUSG00000063694/ENSMUSG00000017778/ENSMUSG00000025076/ENSMUSG00000021606/ENSMUSG00000031059/ENSMUSG00000061518/ENSMUSG00000071014/ENSMUSG00000036835/ENSMUSG00000044894/ENSMUSG00000031818/ENSMUSG00000024099/ENSMUSG00000031628/ENSMUSG00000064354/ENSMUSG00000037916/ENSMUSG00000034566/ENSMUSG00000028648/ENSMUSG00000024038/ENSMUSG00000036751/ENSMUSG00000031231/…	Ndufa5/Ndufb8/Cycs/Cox7c/Casp7/Ndufs6/Ndufb11/Cox5b/Ndufb6/Psenen/Uqcrq/Cox4i1/Ndufv2/Casp3/mt-Co2/Ndufv1/Atp5h/Ndufs5/Ndufv3/Cox6b1/Cox7b/Ndufb10/Cyc1/Snca/Fadd	mmu:68202/mmu:67264/mmu:13063/mmu:12867/mmu:12369/mmu:407785/mmu:104130/mmu:12859/mmu:230075/mmu:66340/mmu:22272/mmu:12857/mmu:72900/mmu:12367/mmu:17709/mmu:17995/mmu:71679/mmu:595136/mmu:78330/mmu:110323/mmu:66142/mmu:68342/mmu:66445/mmu:20617/mmu:14082	25
mmu04932	Non-alcoholic fatty liver disease (NAFLD)	21|231	145|6597	2.40576e-08	1.82838e-06	ENSMUSG00000023089/ENSMUSG00000025204/ENSMUSG00000063694/ENSMUSG00000017778/ENSMUSG00000025076/ENSMUSG00000021606/ENSMUSG00000031059/ENSMUSG00000061518/ENSMUSG00000071014/ENSMUSG00000044894/ENSMUSG00000031818/ENSMUSG00000024099/ENSMUSG00000031628/ENSMUSG00000064354/ENSMUSG00000037916/ENSMUSG00000028648/ENSMUSG00000024038/ENSMUSG00000036751/ENSMUSG00000031231/ENSMUSG00000040048/ENSMUSG00000022551	Ndufa5/Ndufb8/Cycs/Cox7c/Casp7/Ndufs6/Ndufb11/Cox5b/Ndufb6/Uqcrq/Cox4i1/Ndufv2/Casp3/mt-Co2/Ndufv1/Ndufs5/Ndufv3/Cox6b1/Cox7b/Ndufb10/Cyc1	mmu:68202/mmu:67264/mmu:13063/mmu:12867/mmu:12369/mmu:407785/mmu:104130/mmu:12859/mmu:230075/mmu:22272/mmu:12857/mmu:72900/mmu:12367/mmu:17709/mmu:17995/mmu:595136/mmu:78330/mmu:110323/mmu:66142/mmu:68342/mmu:66445	21
mmu00190	Oxidative phosphorylation	19|231	129|6597	8.76062e-08	4.99356e-06	ENSMUSG00000023089/ENSMUSG00000025204/ENSMUSG00000017778/ENSMUSG00000021606/ENSMUSG00000031059/ENSMUSG00000061518/ENSMUSG00000071014/ENSMUSG00000044894/ENSMUSG00000031818/ENSMUSG00000024099/ENSMUSG00000064354/ENSMUSG00000037916/ENSMUSG00000034566/ENSMUSG00000028648/ENSMUSG00000024038/ENSMUSG00000036751/ENSMUSG00000031231/ENSMUSG00000040048/ENSMUSG00000022551	Ndufa5/Ndufb8/Cox7c/Ndufs6/Ndufb11/Cox5b/Ndufb6/Uqcrq/Cox4i1/Ndufv2/mt-Co2/Ndufv1/Atp5h/Ndufs5/Ndufv3/Cox6b1/Cox7b/Ndufb10/Cyc1	mmu:68202/mmu:67264/mmu:12867/mmu:407785/mmu:104130/mmu:12859/mmu:230075/mmu:22272/mmu:12857/mmu:72900/mmu:17709/mmu:17995/mmu:71679/mmu:595136/mmu:78330/mmu:110323/mmu:66142/mmu:68342/mmu:66445	19
mmu05016	Huntington disease	22|231	187|6597	4.84672e-07	2.2101e-05	ENSMUSG00000023089/ENSMUSG00000025204/ENSMUSG00000063694/ENSMUSG00000017778/ENSMUSG00000021606/ENSMUSG00000031059/ENSMUSG00000061518/ENSMUSG00000071014/ENSMUSG00000044894/ENSMUSG00000031818/ENSMUSG00000024099/ENSMUSG00000031628/ENSMUSG00000064354/ENSMUSG00000037916/ENSMUSG00000034566/ENSMUSG00000028648/ENSMUSG00000031783/ENSMUSG00000024038/ENSMUSG00000036751/ENSMUSG00000031231/ENSMUSG00000040048/…	Ndufa5/Ndufb8/Cycs/Cox7c/Ndufs6/Ndufb11/Cox5b/Ndufb6/Uqcrq/Cox4i1/Ndufv2/Casp3/mt-Co2/Ndufv1/Atp5h/Ndufs5/Polr2c/Ndufv3/Cox6b1/Cox7b/Ndufb10/Cyc1	mmu:68202/mmu:67264/mmu:13063/mmu:12867/mmu:407785/mmu:104130/mmu:12859/mmu:230075/mmu:22272/mmu:12857/mmu:72900/mmu:12367/mmu:17709/mmu:17995/mmu:71679/mmu:595136/mmu:20021/mmu:78330/mmu:110323/mmu:66142/mmu:68342/mmu:66445	22
mmu03050	Proteasome	9|231	46|6597	2.4056e-05	0.000914126	ENSMUSG00000020708/ENSMUSG00000026914/ENSMUSG00000005625/ENSMUSG00000002102/ENSMUSG00000015671/ENSMUSG00000029649/ENSMUSG00000069744/ENSMUSG00000020720/ENSMUSG00000028837	Psmc5/Psmd14/Psmd4/Psmc3/Psma2/Pomp/Psmb3/Psmd12/Psmb2	mmu:19184/mmu:59029/mmu:19185/mmu:19182/mmu:19166/mmu:66537/mmu:26446/mmu:66997/mmu:26445	9
mmu04714	Thermogenesis	19|231	224|6597	0.000294644	0.00959698	ENSMUSG00000023089/ENSMUSG00000025204/ENSMUSG00000017778/ENSMUSG00000021606/ENSMUSG00000031059/ENSMUSG00000061518/ENSMUSG00000071014/ENSMUSG00000044894/ENSMUSG00000031818/ENSMUSG00000024099/ENSMUSG00000064354/ENSMUSG00000037916/ENSMUSG00000034566/ENSMUSG00000028648/ENSMUSG00000024038/ENSMUSG00000036751/ENSMUSG00000031231/ENSMUSG00000040048/ENSMUSG00000022551	Ndufa5/Ndufb8/Cox7c/Ndufs6/Ndufb11/Cox5b/Ndufb6/Uqcrq/Cox4i1/Ndufv2/mt-Co2/Ndufv1/Atp5h/Ndufs5/Ndufv3/Cox6b1/Cox7b/Ndufb10/Cyc1	mmu:68202/mmu:67264/mmu:12867/mmu:407785/mmu:104130/mmu:12859/mmu:230075/mmu:22272/mmu:12857/mmu:72900/mmu:17709/mmu:17995/mmu:71679/mmu:595136/mmu:78330/mmu:110323/mmu:66142/mmu:68342/mmu:66445	19
mmu00100	Steroid biosynthesis	5|231	19|6597	0.000391905	0.0111693	ENSMUSG00000031604/ENSMUSG00000026675/ENSMUSG00000033105/ENSMUSG00000031349/ENSMUSG00000021273	Msmo1/Hsd17b7/Lss/Nsdhl/Fdft1	mmu:66234/mmu:15490/mmu:16987/mmu:18194/mmu:14137	5
mmu04723	Retrograde endocannabinoid signaling	14|231	145|6597	0.000517634	0.0131134	ENSMUSG00000023089/ENSMUSG00000095845/ENSMUSG00000025204/ENSMUSG00000021606/ENSMUSG00000063594/ENSMUSG00000031059/ENSMUSG00000071014/ENSMUSG00000071658/ENSMUSG00000024099/ENSMUSG00000032766/ENSMUSG00000037916/ENSMUSG00000028648/ENSMUSG00000024038/ENSMUSG00000040048	Ndufa5/Gm5741/Ndufb8/Ndufs6/Gng8/Ndufb11/Ndufb6/Gng3/Ndufv2/Gng11/Ndufv1/Ndufs5/Ndufv3/Ndufb10	mmu:68202/mmu:100503710/mmu:67264/mmu:407785/mmu:14709/mmu:104130/mmu:230075/mmu:14704/mmu:72900/mmu:66066/mmu:17995/mmu:595136/mmu:78330/mmu:68342	14

## Sheet: eWAT KEGG WT Up
KEGGID	Description	GeneRatio	BgRatio	pvalue	padj	geneID	geneName	keggID	Count
mmu05164	Influenza A	37|525	149|6388	4.7183e-10	1.34943e-07	ENSMUSG00000032661/ENSMUSG00000032690/ENSMUSG00000025498/ENSMUSG00000040296/ENSMUSG00000036986/ENSMUSG00000025746/ENSMUSG00000002325/ENSMUSG00000029605/ENSMUSG00000004864/ENSMUSG00000066861/ENSMUSG00000035352/ENSMUSG00000052776/ENSMUSG00000023341/ENSMUSG00000020641/ENSMUSG00000022504/ENSMUSG00000032508/ENSMUSG00000040033/ENSMUSG00000024810/ENSMUSG00000022971/ENSMUSG00000053436/ENSMUSG00000022136/…	Oas3/Oas2/Irf7/Ddx58/Pml/Il6/Irf9/Oas1b/Mapk13/Oas1g/Ccl12/Oas1a/Mx2/Rsad2/Ciita/Myd88/Stat2/Il33/Ifnar2/Mapk14/Dnajc3/Tlr7/Il18/Nlrp3/Rnasel/Tlr4/Stat1/Nxt1/Tmprss4/Pycard/Cpsf4/Adar/Ifih1/Pik3cd/Cxcl10/Eif2ak2/Actb	mmu:246727/mmu:246728/mmu:54123/mmu:230073/mmu:18854/mmu:16193/mmu:16391/mmu:23961/mmu:26415/mmu:23960/mmu:20293/mmu:246730/mmu:17858/mmu:58185/mmu:12265/mmu:17874/mmu:20847/mmu:77125/mmu:15976/mmu:26416/mmu:100037258/mmu:170743/mmu:16173/mmu:216799/mmu:24014/mmu:21898/mmu:20846/mmu:56488/mmu:214523/mmu:66824/mmu:54188/mmu:56417/mmu:71586/mmu:18707/mmu:15945/mmu:19106/mmu:11461	37
mmu05340	Primary immunodeficiency	14|525	34|6388	1.61091e-07	2.23676e-05	ENSMUSG00000010142/ENSMUSG00000017652/ENSMUSG00000022504/ENSMUSG00000037321/ENSMUSG00000026648/ENSMUSG00000026117/ENSMUSG00000049686/ENSMUSG00000032094/ENSMUSG00000000409/ENSMUSG00000036120/ENSMUSG00000029591/ENSMUSG00000017697/ENSMUSG00000053044/ENSMUSG00000053977	Tnfrsf13b/Cd40/Ciita/Tap1/Dclre1c/Zap70/Orai1/Cd3d/Lck/Rfxank/Ung/Ada/Cd8b1/Cd8a	mmu:57916/mmu:21939/mmu:12265/mmu:21354/mmu:227525/mmu:22637/mmu:109305/mmu:12500/mmu:16818/mmu:19727/mmu:22256/mmu:11486/mmu:12526/mmu:12525	14
mmu04620	Toll-like receptor signaling pathway	23|525	86|6388	2.34625e-07	2.23676e-05	ENSMUSG00000051439/ENSMUSG00000025498/ENSMUSG00000022901/ENSMUSG00000025746/ENSMUSG00000045322/ENSMUSG00000004864/ENSMUSG00000029304/ENSMUSG00000017652/ENSMUSG00000044827/ENSMUSG00000032508/ENSMUSG00000015755/ENSMUSG00000022971/ENSMUSG00000029417/ENSMUSG00000053436/ENSMUSG00000026029/ENSMUSG00000044583/ENSMUSG00000040522/ENSMUSG00000018930/ENSMUSG00000039005/ENSMUSG00000026104/ENSMUSG00000056130/…	Cd14/Irf7/Cd86/Il6/Tlr9/Mapk13/Spp1/Cd40/Tlr1/Myd88/Tab2/Ifnar2/Cxcl9/Mapk14/Casp8/Tlr7/Tlr8/Ccl4/Tlr4/Stat1/Ticam2/Pik3cd/Cxcl10	mmu:12475/mmu:54123/mmu:12524/mmu:16193/mmu:81897/mmu:26415/mmu:20750/mmu:21939/mmu:21897/mmu:17874/mmu:68652/mmu:15976/mmu:17329/mmu:26416/mmu:12370/mmu:170743/mmu:170744/mmu:20303/mmu:21898/mmu:20846/mmu:225471/mmu:18707/mmu:15945	23
mmu04621	NOD-like receptor signaling pathway	32|525	150|6388	3.40997e-07	2.43813e-05	ENSMUSG00000032661/ENSMUSG00000032690/ENSMUSG00000025498/ENSMUSG00000025746/ENSMUSG00000002325/ENSMUSG00000029605/ENSMUSG00000004864/ENSMUSG00000066861/ENSMUSG00000035352/ENSMUSG00000052776/ENSMUSG00000009292/ENSMUSG00000032508/ENSMUSG00000040033/ENSMUSG00000024960/ENSMUSG00000040253/ENSMUSG00000015755/ENSMUSG00000024349/ENSMUSG00000022971/ENSMUSG00000028268/ENSMUSG00000022575/ENSMUSG00000053436/…	Oas3/Oas2/Irf7/Il6/Irf9/Oas1b/Mapk13/Oas1g/Ccl12/Oas1a/Trpm2/Myd88/Stat2/Plcb3/Gbp7/Tab2/Tmem173/Ifnar2/Gbp3/Gsdmd/Mapk14/Casp8/Gbp2/Gbp5/Il18/Nlrp3/Rnasel/Tlr4/Stat1/Ifi204/Sharpin/Pycard	mmu:246727/mmu:246728/mmu:54123/mmu:16193/mmu:16391/mmu:23961/mmu:26415/mmu:23960/mmu:20293/mmu:246730/mmu:28240/mmu:17874/mmu:20847/mmu:18797/mmu:229900/mmu:68652/mmu:72512/mmu:15976/mmu:55932/mmu:69146/mmu:26416/mmu:12370/mmu:14469/mmu:229898/mmu:16173/mmu:216799/mmu:24014/mmu:21898/mmu:20846/mmu:15951/mmu:106025/mmu:66824	32
mmu05162	Measles	27|525	123|6388	1.5942e-06	9.11883e-05	ENSMUSG00000026656/ENSMUSG00000032661/ENSMUSG00000032690/ENSMUSG00000025498/ENSMUSG00000040296/ENSMUSG00000025746/ENSMUSG00000045322/ENSMUSG00000002325/ENSMUSG00000029605/ENSMUSG00000066861/ENSMUSG00000052776/ENSMUSG00000023341/ENSMUSG00000032508/ENSMUSG00000040033/ENSMUSG00000015755/ENSMUSG00000022971/ENSMUSG00000068227/ENSMUSG00000044583/ENSMUSG00000032094/ENSMUSG00000039005/ENSMUSG00000005696/…	Fcgr2b/Oas3/Oas2/Irf7/Ddx58/Il6/Tlr9/Irf9/Oas1b/Oas1g/Oas1a/Mx2/Myd88/Stat2/Tab2/Ifnar2/Il2rb/Tlr7/Cd3d/Tlr4/Sh2d1a/Stat1/Cd3g/Adar/Ifih1/Pik3cd/Eif2ak2	mmu:14130/mmu:246727/mmu:246728/mmu:54123/mmu:230073/mmu:16193/mmu:81897/mmu:16391/mmu:23961/mmu:23960/mmu:246730/mmu:17858/mmu:17874/mmu:20847/mmu:68652/mmu:15976/mmu:16185/mmu:170743/mmu:12500/mmu:21898/mmu:20400/mmu:20846/mmu:12502/mmu:56417/mmu:71586/mmu:18707/mmu:19106	27
mmu05168	Herpes simplex infection	34|525	181|6388	3.25851e-06	0.000155322	ENSMUSG00000034459/ENSMUSG00000032661/ENSMUSG00000032690/ENSMUSG00000025498/ENSMUSG00000040296/ENSMUSG00000036986/ENSMUSG00000025746/ENSMUSG00000045322/ENSMUSG00000002325/ENSMUSG00000042333/ENSMUSG00000029605/ENSMUSG00000001128/ENSMUSG00000066861/ENSMUSG00000035352/ENSMUSG00000052776/ENSMUSG00000026222/ENSMUSG00000062300/ENSMUSG00000037321/ENSMUSG00000032508/ENSMUSG00000005824/ENSMUSG00000016206/…	Ifit1/Oas3/Oas2/Irf7/Ddx58/Pml/Il6/Tlr9/Irf9/Tnfrsf14/Oas1b/Cfp/Oas1g/Ccl12/Oas1a/Sp100/Nectin2/Tap1/Myd88/Tnfsf14/H2-M3/Stat2/Ifit1bl1/Tab2/Ifnar2/H2-T24/Casp8/Rnasel/Stat1/H2-T23/Ifih1/H2-Q7/Mcrs1/Eif2ak2	mmu:15957/mmu:246727/mmu:246728/mmu:54123/mmu:230073/mmu:18854/mmu:16193/mmu:81897/mmu:16391/mmu:230979/mmu:23961/mmu:18636/mmu:23960/mmu:20293/mmu:246730/mmu:20684/mmu:19294/mmu:21354/mmu:17874/mmu:50930/mmu:14991/mmu:20847/mmu:667373/mmu:68652/mmu:15976/mmu:15042/mmu:12370/mmu:24014/mmu:20846/mmu:15040/mmu:71586/mmu:110558/mmu:51812/mmu:19106	34
mmu04612	Antigen processing and presentation	18|525	71|6388	1.10188e-05	0.000450196	ENSMUSG00000021190/ENSMUSG00000027248/ENSMUSG00000022504/ENSMUSG00000037321/ENSMUSG00000016206/ENSMUSG00000026864/ENSMUSG00000053835/ENSMUSG00000078153/ENSMUSG00000003814/ENSMUSG00000021477/ENSMUSG00000020368/ENSMUSG00000036120/ENSMUSG00000067212/ENSMUSG00000022216/ENSMUSG00000053044/ENSMUSG00000060550/ENSMUSG00000030167/ENSMUSG00000053977	Lgmn/Pdia3/Ciita/Tap1/H2-M3/Hspa5/H2-T24/Psme2b/Calr/Ctsl/Canx/Rfxank/H2-T23/Psme1/Cd8b1/H2-Q7/Klrc1/Cd8a	mmu:19141/mmu:14827/mmu:12265/mmu:21354/mmu:14991/mmu:14828/mmu:15042/mmu:621823/mmu:12317/mmu:13039/mmu:12330/mmu:19727/mmu:15040/mmu:19186/mmu:12526/mmu:110558/mmu:16641/mmu:12525	18
mmu05169	Epstein-Barr virus infection	34|525	197|6388	2.19486e-05	0.000784664	ENSMUSG00000035692/ENSMUSG00000032661/ENSMUSG00000032690/ENSMUSG00000025498/ENSMUSG00000040296/ENSMUSG00000025746/ENSMUSG00000002325/ENSMUSG00000029605/ENSMUSG00000004864/ENSMUSG00000066861/ENSMUSG00000052776/ENSMUSG00000027248/ENSMUSG00000017652/ENSMUSG00000037321/ENSMUSG00000032508/ENSMUSG00000016206/ENSMUSG00000040033/ENSMUSG00000015755/ENSMUSG00000022971/ENSMUSG00000053835/ENSMUSG00000053436/…	Isg15/Oas3/Oas2/Irf7/Ddx58/Il6/Irf9/Oas1b/Mapk13/Oas1g/Oas1a/Pdia3/Cd40/Tap1/Myd88/H2-M3/Stat2/Tab2/Ifnar2/H2-T24/Mapk14/Casp8/Calr/Cd3d/Stat1/Cd3g/Bcl2l11/H2-T23/Runx3/Pik3cd/Cxcl10/Entpd3/H2-Q7/Eif2ak2	mmu:100038882/mmu:246727/mmu:246728/mmu:54123/mmu:230073/mmu:16193/mmu:16391/mmu:23961/mmu:26415/mmu:23960/mmu:246730/mmu:14827/mmu:21939/mmu:21354/mmu:17874/mmu:14991/mmu:20847/mmu:68652/mmu:15976/mmu:15042/mmu:26416/mmu:12370/mmu:12317/mmu:12500/mmu:20846/mmu:12502/mmu:12125/mmu:15040/mmu:12399/mmu:18707/mmu:15945/mmu:215446/mmu:110558/mmu:19106	34
mmu04062	Chemokine signaling pathway	31|525	174|6388	2.67485e-05	0.000850007	ENSMUSG00000079227/ENSMUSG00000009185/ENSMUSG00000018927/ENSMUSG00000018920/ENSMUSG00000035352/ENSMUSG00000060216/ENSMUSG00000020395/ENSMUSG00000029373/ENSMUSG00000040033/ENSMUSG00000024960/ENSMUSG00000026180/ENSMUSG00000005034/ENSMUSG00000029417/ENSMUSG00000048521/ENSMUSG00000018930/ENSMUSG00000050232/ENSMUSG00000024858/ENSMUSG00000029530/ENSMUSG00000039621/ENSMUSG00000026104/ENSMUSG00000052681/…	Ccr5/Ccl8/Ccl6/Cxcl16/Ccl12/Arrb2/Itk/Pf4/Stat2/Plcb3/Cxcr2/Prkacb/Cxcl9/Cxcr6/Ccl4/Cxcr3/Grk2/Ccr9/Prex1/Stat1/Rap1b/Vav1/Pik3r6/Cxcl12/Xcl1/Bad/Pik3cd/Cxcl10/Grk3/Ccl27a/Adcy3	mmu:12774/mmu:20307/mmu:20305/mmu:66102/mmu:20293/mmu:216869/mmu:16428/mmu:56744/mmu:20847/mmu:18797/mmu:12765/mmu:18749/mmu:17329/mmu:80901/mmu:20303/mmu:12766/mmu:110355/mmu:12769/mmu:277360/mmu:20846/mmu:215449/mmu:22324/mmu:104709/mmu:20315/mmu:16963/mmu:12015/mmu:18707/mmu:15945/mmu:320129/mmu:100040048/mmu:104111	31
mmu04060	Cytokine-cytokine receptor interaction	38|525	238|6388	4.44658e-05	0.00127172	ENSMUSG00000079227/ENSMUSG00000009185/ENSMUSG00000030748/ENSMUSG00000025746/ENSMUSG00000042333/ENSMUSG00000030745/ENSMUSG00000017057/ENSMUSG00000000791/ENSMUSG00000018927/ENSMUSG00000018920/ENSMUSG00000006235/ENSMUSG00000035352/ENSMUSG00000010142/ENSMUSG00000028859/ENSMUSG00000016529/ENSMUSG00000017652/ENSMUSG00000029373/ENSMUSG00000005824/ENSMUSG00000008318/ENSMUSG00000027947/ENSMUSG00000024810/…	Ccr5/Ccl8/Il4ra/Il6/Tnfrsf14/Il21r/Il13ra1/Il12rb1/Ccl6/Cxcl16/Epor/Ccl12/Tnfrsf13b/Csf3r/Il10/Cd40/Pf4/Tnfsf14/Relt/Il6ra/Il33/Cxcr2/Ifnar2/Il2rb/Cxcl9/Il10ra/Cxcr6/Il18/Ccl4/Csf1r/Cxcr3/Gdf6/Ccr9/Bmp2/Cxcl12/Xcl1/Cxcl10/Ccl27a	mmu:12774/mmu:20307/mmu:16190/mmu:16193/mmu:230979/mmu:60504/mmu:16164/mmu:16161/mmu:20305/mmu:66102/mmu:13857/mmu:20293/mmu:57916/mmu:12986/mmu:16153/mmu:21939/mmu:56744/mmu:50930/mmu:320100/mmu:16194/mmu:77125/mmu:12765/mmu:15976/mmu:16185/mmu:17329/mmu:16154/mmu:80901/mmu:16173/mmu:20303/mmu:12978/mmu:12766/mmu:242316/mmu:12769/mmu:12156/mmu:20315/mmu:16963/mmu:15945/mmu:100040048	38
mmu05133	Pertussis	17|525	72|6388	5.21093e-05	0.00135484	ENSMUSG00000036887/ENSMUSG00000036905/ENSMUSG00000036896/ENSMUSG00000051439/ENSMUSG00000025746/ENSMUSG00000004864/ENSMUSG00000016529/ENSMUSG00000032508/ENSMUSG00000018899/ENSMUSG00000053436/ENSMUSG00000023224/ENSMUSG00000032691/ENSMUSG00000039005/ENSMUSG00000056130/ENSMUSG00000030793/ENSMUSG00000041515/ENSMUSG00000025076	C1qa/C1qb/C1qc/Cd14/Il6/Mapk13/Il10/Myd88/Irf1/Mapk14/Serping1/Nlrp3/Tlr4/Ticam2/Pycard/Irf8/Casp7	mmu:12259/mmu:12260/mmu:12262/mmu:12475/mmu:16193/mmu:26415/mmu:16153/mmu:17874/mmu:16362/mmu:26416/mmu:12258/mmu:216799/mmu:21898/mmu:225471/mmu:66824/mmu:15900/mmu:12369	17
mmu05160	Hepatitis C	22|525	110|6388	6.78668e-05	0.00161749	ENSMUSG00000034459/ENSMUSG00000032661/ENSMUSG00000032690/ENSMUSG00000025498/ENSMUSG00000040296/ENSMUSG00000002325/ENSMUSG00000070473/ENSMUSG00000029605/ENSMUSG00000004864/ENSMUSG00000066861/ENSMUSG00000052776/ENSMUSG00000024500/ENSMUSG00000040033/ENSMUSG00000079339/ENSMUSG00000018899/ENSMUSG00000022971/ENSMUSG00000053436/ENSMUSG00000066800/ENSMUSG00000026104/ENSMUSG00000024959/ENSMUSG00000039936/…	Ifit1/Oas3/Oas2/Irf7/Ddx58/Irf9/Cldn3/Oas1b/Mapk13/Oas1g/Oas1a/Ppp2r2b/Stat2/Ifit1bl1/Irf1/Ifnar2/Mapk14/Rnasel/Stat1/Bad/Pik3cd/Eif2ak2	mmu:15957/mmu:246727/mmu:246728/mmu:54123/mmu:230073/mmu:16391/mmu:12739/mmu:23961/mmu:26415/mmu:23960/mmu:246730/mmu:72930/mmu:20847/mmu:667373/mmu:16362/mmu:15976/mmu:26416/mmu:24014/mmu:20846/mmu:12015/mmu:18707/mmu:19106	22
mmu04141	Protein processing in endoplasmic reticulum	26|525	157|6388	0.000399169	0.00878172	ENSMUSG00000025823/ENSMUSG00000020571/ENSMUSG00000009092/ENSMUSG00000020048/ENSMUSG00000041556/ENSMUSG00000027248/ENSMUSG00000030062/ENSMUSG00000028757/ENSMUSG00000026864/ENSMUSG00000025130/ENSMUSG00000027642/ENSMUSG00000022136/ENSMUSG00000003814/ENSMUSG00000032115/ENSMUSG00000029616/ENSMUSG00000030036/ENSMUSG00000037306/ENSMUSG00000020368/ENSMUSG00000003746/ENSMUSG00000004460/ENSMUSG00000075701/…	Pdia4/Pdia6/Derl3/Hsp90b1/Fbxo2/Pdia3/Rpn1/Ddost/Hspa5/P4hb/Rpn2/Dnajc3/Calr/Hyou1/Erp29/Mogs/Man1c1/Canx/Man1a/Dnajb11/Selenos/Sec61g/Atf6b/Rrbp1/Fbxo6/Eif2ak2	mmu:12304/mmu:71853/mmu:70377/mmu:22027/mmu:230904/mmu:14827/mmu:103963/mmu:13200/mmu:14828/mmu:18453/mmu:20014/mmu:100037258/mmu:12317/mmu:12282/mmu:67397/mmu:57377/mmu:230815/mmu:12330/mmu:17155/mmu:67838/mmu:109815/mmu:20335/mmu:12915/mmu:81910/mmu:50762/mmu:19106	26
mmu05142	Chagas disease (American trypanosomiasis)	19|525	101|6388	0.000478423	0.00977351	ENSMUSG00000036887/ENSMUSG00000036905/ENSMUSG00000036896/ENSMUSG00000025746/ENSMUSG00000045322/ENSMUSG00000004864/ENSMUSG00000035352/ENSMUSG00000016529/ENSMUSG00000032508/ENSMUSG00000024500/ENSMUSG00000024960/ENSMUSG00000053436/ENSMUSG00000026029/ENSMUSG00000003814/ENSMUSG00000024524/ENSMUSG00000032094/ENSMUSG00000039005/ENSMUSG00000002033/ENSMUSG00000039936	C1qa/C1qb/C1qc/Il6/Tlr9/Mapk13/Ccl12/Il10/Myd88/Ppp2r2b/Plcb3/Mapk14/Casp8/Calr/Gnal/Cd3d/Tlr4/Cd3g/Pik3cd	mmu:12259/mmu:12260/mmu:12262/mmu:16193/mmu:81897/mmu:26415/mmu:20293/mmu:16153/mmu:17874/mmu:72930/mmu:18797/mmu:26416/mmu:12370/mmu:12317/mmu:14680/mmu:12500/mmu:21898/mmu:12502/mmu:18707	19
mmu04660	T cell receptor signaling pathway	18|525	98|6388	0.000898496	0.0171313	ENSMUSG00000027544/ENSMUSG00000004864/ENSMUSG00000016529/ENSMUSG00000020395/ENSMUSG00000026117/ENSMUSG00000004266/ENSMUSG00000053436/ENSMUSG00000002699/ENSMUSG00000033016/ENSMUSG00000032094/ENSMUSG00000000409/ENSMUSG00000034116/ENSMUSG00000074923/ENSMUSG00000002033/ENSMUSG00000026011/ENSMUSG00000039936/ENSMUSG00000053044/ENSMUSG00000053977	Nfatc2/Mapk13/Il10/Itk/Zap70/Ptpn6/Mapk14/Lcp2/Nfatc1/Cd3d/Lck/Vav1/Pak6/Cd3g/Ctla4/Pik3cd/Cd8b1/Cd8a	mmu:18019/mmu:26415/mmu:16153/mmu:16428/mmu:22637/mmu:15170/mmu:26416/mmu:16822/mmu:18018/mmu:12500/mmu:16818/mmu:22324/mmu:214230/mmu:12502/mmu:12477/mmu:18707/mmu:12526/mmu:12525	18
mmu05170	Human immunodeficiency virus 1 infection	30|525	202|6388	0.000981506	0.0175444	ENSMUSG00000079227/ENSMUSG00000027544/ENSMUSG00000004864/ENSMUSG00000009090/ENSMUSG00000027248/ENSMUSG00000037321/ENSMUSG00000032508/ENSMUSG00000016206/ENSMUSG00000046718/ENSMUSG00000009585/ENSMUSG00000015755/ENSMUSG00000024349/ENSMUSG00000031367/ENSMUSG00000053835/ENSMUSG00000053436/ENSMUSG00000026029/ENSMUSG00000003814/ENSMUSG00000033016/ENSMUSG00000032094/ENSMUSG00000039005/ENSMUSG00000018012/…	Ccr5/Nfatc2/Mapk13/Ap1b1/Pdia3/Tap1/Myd88/H2-M3/Bst2/Apobec3/Tab2/Tmem173/Ap1s2/H2-T24/Mapk14/Casp8/Calr/Nfatc1/Cd3d/Tlr4/Rac3/Trim30d/Pak6/Cd3g/Ap1g2/H2-T23/Bad/Pik3cd/H2-Q7/Chek1	mmu:12774/mmu:18019/mmu:26415/mmu:11764/mmu:14827/mmu:21354/mmu:17874/mmu:14991/mmu:69550/mmu:80287/mmu:68652/mmu:72512/mmu:108012/mmu:15042/mmu:26416/mmu:12370/mmu:12317/mmu:18018/mmu:12500/mmu:21898/mmu:170758/mmu:209387/mmu:214230/mmu:12502/mmu:11766/mmu:15040/mmu:12015/mmu:18707/mmu:110558/mmu:12649	30
mmu04380	Osteoclast differentiation	21|525	124|6388	0.00105127	0.0176861	ENSMUSG00000026656/ENSMUSG00000015947/ENSMUSG00000027544/ENSMUSG00000059089/ENSMUSG00000002325/ENSMUSG00000004864/ENSMUSG00000040033/ENSMUSG00000015755/ENSMUSG00000022971/ENSMUSG00000053436/ENSMUSG00000002699/ENSMUSG00000095788/ENSMUSG00000074677/ENSMUSG00000033016/ENSMUSG00000024621/ENSMUSG00000026104/ENSMUSG00000000409/ENSMUSG00000059498/ENSMUSG00000039936/ENSMUSG00000038037/ENSMUSG00000037902	Fcgr2b/Fcgr1/Nfatc2/Fcgr4/Irf9/Mapk13/Stat2/Tab2/Ifnar2/Mapk14/Lcp2/Sirpb1a/Sirpb1c/Nfatc1/Csf1r/Stat1/Lck/Fcgr3/Pik3cd/Socs1/Sirpa	mmu:14130/mmu:14129/mmu:18019/mmu:246256/mmu:16391/mmu:26415/mmu:20847/mmu:68652/mmu:15976/mmu:26416/mmu:16822/mmu:320832/mmu:100038947/mmu:18018/mmu:12978/mmu:20846/mmu:16818/mmu:14131/mmu:18707/mmu:12703/mmu:19261	21
mmu04623	Cytosolic DNA-sensing pathway	11|525	48|6388	0.00142135	0.0225836	ENSMUSG00000027514/ENSMUSG00000025498/ENSMUSG00000040296/ENSMUSG00000025746/ENSMUSG00000024810/ENSMUSG00000024349/ENSMUSG00000039217/ENSMUSG00000018930/ENSMUSG00000030793/ENSMUSG00000027951/ENSMUSG00000034855	Zbp1/Irf7/Ddx58/Il6/Il33/Tmem173/Il18/Ccl4/Pycard/Adar/Cxcl10	mmu:58203/mmu:54123/mmu:230073/mmu:16193/mmu:77125/mmu:72512/mmu:16173/mmu:20303/mmu:66824/mmu:56417/mmu:15945	11
mmu05321	Inflammatory bowel disease (IBD)	12|525	56|6388	0.00163268	0.0245762	ENSMUSG00000030748/ENSMUSG00000055435/ENSMUSG00000025746/ENSMUSG00000030745/ENSMUSG00000000791/ENSMUSG00000016529/ENSMUSG00000039217/ENSMUSG00000033016/ENSMUSG00000039005/ENSMUSG00000026104/ENSMUSG00000028150/ENSMUSG00000001444	Il4ra/Maf/Il6/Il21r/Il12rb1/Il10/Il18/Nfatc1/Tlr4/Stat1/Rorc/Tbx21	mmu:16190/mmu:17132/mmu:16193/mmu:60504/mmu:16161/mmu:16153/mmu:16173/mmu:18018/mmu:21898/mmu:20846/mmu:19885/mmu:57765	12
mmu04640	Hematopoietic cell lineage	16|525	88|6388	0.00190494	0.0272407	ENSMUSG00000015947/ENSMUSG00000029084/ENSMUSG00000051439/ENSMUSG00000030748/ENSMUSG00000024669/ENSMUSG00000025746/ENSMUSG00000006235/ENSMUSG00000028859/ENSMUSG00000027947/ENSMUSG00000024621/ENSMUSG00000032094/ENSMUSG00000002033/ENSMUSG00000025163/ENSMUSG00000053044/ENSMUSG00000110206/ENSMUSG00000053977	Fcgr1/Cd38/Cd14/Il4ra/Cd5/Il6/Epor/Csf3r/Il6ra/Csf1r/Cd3d/Cd3g/Cd7/Cd8b1/Flt3l/Cd8a	mmu:14129/mmu:12494/mmu:12475/mmu:16190/mmu:12507/mmu:16193/mmu:13857/mmu:12986/mmu:16194/mmu:12978/mmu:12500/mmu:12502/mmu:12516/mmu:12526/mmu:14256/mmu:12525	16
mmu04659	Th17 cell differentiation	17|525	98|6388	0.00235978	0.0321379	ENSMUSG00000030748/ENSMUSG00000027544/ENSMUSG00000025746/ENSMUSG00000030745/ENSMUSG00000004864/ENSMUSG00000000791/ENSMUSG00000026117/ENSMUSG00000027947/ENSMUSG00000068227/ENSMUSG00000053436/ENSMUSG00000033016/ENSMUSG00000032094/ENSMUSG00000026104/ENSMUSG00000028150/ENSMUSG00000000409/ENSMUSG00000002033/ENSMUSG00000001444	Il4ra/Nfatc2/Il6/Il21r/Mapk13/Il12rb1/Zap70/Il6ra/Il2rb/Mapk14/Nfatc1/Cd3d/Stat1/Rorc/Lck/Cd3g/Tbx21	mmu:16190/mmu:18019/mmu:16193/mmu:60504/mmu:26415/mmu:16161/mmu:22637/mmu:16194/mmu:16185/mmu:26416/mmu:18018/mmu:12500/mmu:20846/mmu:19885/mmu:16818/mmu:12502/mmu:57765	17
mmu05152	Tuberculosis	24|525	160|6388	0.00268288	0.0348775	ENSMUSG00000026656/ENSMUSG00000026712/ENSMUSG00000015947/ENSMUSG00000022479/ENSMUSG00000051439/ENSMUSG00000059089/ENSMUSG00000025746/ENSMUSG00000045322/ENSMUSG00000004864/ENSMUSG00000016529/ENSMUSG00000022504/ENSMUSG00000044827/ENSMUSG00000032508/ENSMUSG00000053436/ENSMUSG00000026029/ENSMUSG00000032089/ENSMUSG00000039217/ENSMUSG00000019173/ENSMUSG00000039005/ENSMUSG00000026104/ENSMUSG00000036120/…	Fcgr2b/Mrc1/Fcgr1/Vdr/Cd14/Fcgr4/Il6/Tlr9/Mapk13/Il10/Ciita/Tlr1/Myd88/Mapk14/Casp8/Il10ra/Il18/Rab5c/Tlr4/Stat1/Rfxank/Bad/Fcgr3/Coro1a	mmu:14130/mmu:17533/mmu:14129/mmu:22337/mmu:12475/mmu:246256/mmu:16193/mmu:81897/mmu:26415/mmu:16153/mmu:12265/mmu:21897/mmu:17874/mmu:26416/mmu:12370/mmu:16154/mmu:16173/mmu:19345/mmu:21898/mmu:20846/mmu:19727/mmu:12015/mmu:14131/mmu:12721	24
mmu04514	Cell adhesion molecules (CAMs)	21|525	135|6388	0.00311514	0.03731	ENSMUSG00000039115/ENSMUSG00000027322/ENSMUSG00000020598/ENSMUSG00000027962/ENSMUSG00000022901/ENSMUSG00000017009/ENSMUSG00000070473/ENSMUSG00000062300/ENSMUSG00000017652/ENSMUSG00000025321/ENSMUSG00000016206/ENSMUSG00000049939/ENSMUSG00000053835/ENSMUSG00000036634/ENSMUSG00000024670/ENSMUSG00000067212/ENSMUSG00000025743/ENSMUSG00000026011/ENSMUSG00000053044/ENSMUSG00000060550/ENSMUSG00000053977	Itga9/Siglec1/Nrcam/Vcam1/Cd86/Sdc4/Cldn3/Nectin2/Cd40/Itgb8/H2-M3/Lrrc4/H2-T24/Mag/Cd6/H2-T23/Sdc3/Ctla4/Cd8b1/H2-Q7/Cd8a	mmu:104099/mmu:20612/mmu:319504/mmu:22329/mmu:12524/mmu:20971/mmu:12739/mmu:19294/mmu:21939/mmu:320910/mmu:14991/mmu:192198/mmu:15042/mmu:17136/mmu:12511/mmu:15040/mmu:20970/mmu:12477/mmu:12526/mmu:110558/mmu:12525	21
mmu04658	Th1 and Th2 cell differentiation	15|525	84|6388	0.00313091	0.03731	ENSMUSG00000030748/ENSMUSG00000055435/ENSMUSG00000027544/ENSMUSG00000004864/ENSMUSG00000000791/ENSMUSG00000026117/ENSMUSG00000068227/ENSMUSG00000053436/ENSMUSG00000033016/ENSMUSG00000032094/ENSMUSG00000026104/ENSMUSG00000000409/ENSMUSG00000002033/ENSMUSG00000001444/ENSMUSG00000070691	Il4ra/Maf/Nfatc2/Mapk13/Il12rb1/Zap70/Il2rb/Mapk14/Nfatc1/Cd3d/Stat1/Lck/Cd3g/Tbx21/Runx3	mmu:16190/mmu:17132/mmu:18019/mmu:26415/mmu:16161/mmu:22637/mmu:16185/mmu:26416/mmu:18018/mmu:12500/mmu:20846/mmu:16818/mmu:12502/mmu:57765/mmu:12399	15
mmu05320	Autoimmune thyroid disease	10|525	47|6388	0.00413806	0.0473394	ENSMUSG00000022901/ENSMUSG00000016529/ENSMUSG00000017652/ENSMUSG00000016206/ENSMUSG00000053835/ENSMUSG00000067212/ENSMUSG00000026011/ENSMUSG00000015437/ENSMUSG00000060550/ENSMUSG00000037202	Cd86/Il10/Cd40/H2-M3/H2-T24/H2-T23/Ctla4/Gzmb/H2-Q7/Prf1	mmu:12524/mmu:16153/mmu:21939/mmu:14991/mmu:15042/mmu:15040/mmu:12477/mmu:14939/mmu:110558/mmu:18646	10
mmu04622	RIG-I-like receptor signaling pathway	11|525	55|6388	0.00445313	0.0489844	ENSMUSG00000035692/ENSMUSG00000025498/ENSMUSG00000040296/ENSMUSG00000004864/ENSMUSG00000017830/ENSMUSG00000024349/ENSMUSG00000034371/ENSMUSG00000053436/ENSMUSG00000026029/ENSMUSG00000026896/ENSMUSG00000034855	Isg15/Irf7/Ddx58/Mapk13/Dhx58/Tmem173/Tkfc/Mapk14/Casp8/Ifih1/Cxcl10	mmu:100038882/mmu:54123/mmu:230073/mmu:26415/mmu:80861/mmu:72512/mmu:225913/mmu:26416/mmu:12370/mmu:71586/mmu:15945	11

## Sheet: eWAT KEGG WT Down
KEGGID	Description	GeneRatio	BgRatio	pvalue	padj	geneID	geneName	keggID	Count
mmu01200	Carbon metabolism	28|508	111|6388	2.20983e-08	6.56319e-06	ENSMUSG00000027605/ENSMUSG00000030695/ENSMUSG00000021196/ENSMUSG00000021748/ENSMUSG00000021957/ENSMUSG00000032418/ENSMUSG00000000168/ENSMUSG00000028961/ENSMUSG00000032279/ENSMUSG00000031700/ENSMUSG00000000628/ENSMUSG00000024640/ENSMUSG00000022546/ENSMUSG00000025950/ENSMUSG00000020664/ENSMUSG00000027187/ENSMUSG00000011752/ENSMUSG00000005683/ENSMUSG00000025503/ENSMUSG00000023832/ENSMUSG00000031432/…	Acss2/Aldoa/Pfkp/Pdhb/Tkt/Me1/Dlat/Pgd/Idh3a/Gpt2/Hk2/Psat1/Gpt/Idh1/Dld/Cat/Pgam1/Cs/Taldo1/Acat2/Prps1/Sucla2/Aco1/Mcee/Tpi1/Rpe/Phgdh/Pcx	mmu:60525/mmu:11674/mmu:56421/mmu:68263/mmu:21881/mmu:17436/mmu:235339/mmu:110208/mmu:67834/mmu:108682/mmu:15277/mmu:107272/mmu:76282/mmu:15926/mmu:13382/mmu:12359/mmu:18648/mmu:12974/mmu:21351/mmu:110460/mmu:19139/mmu:20916/mmu:11428/mmu:73724/mmu:21991/mmu:66646/mmu:236539/mmu:18563	28
mmu01230	Biosynthesis of amino acids	18|508	69|6388	4.48589e-06	0.000526137	ENSMUSG00000030695/ENSMUSG00000021196/ENSMUSG00000021957/ENSMUSG00000032279/ENSMUSG00000031700/ENSMUSG00000024640/ENSMUSG00000022546/ENSMUSG00000025950/ENSMUSG00000028179/ENSMUSG00000011752/ENSMUSG00000005683/ENSMUSG00000025503/ENSMUSG00000031432/ENSMUSG00000028405/ENSMUSG00000023456/ENSMUSG00000026005/ENSMUSG00000053398/ENSMUSG00000024892	Aldoa/Pfkp/Tkt/Idh3a/Gpt2/Psat1/Gpt/Idh1/Cth/Pgam1/Cs/Taldo1/Prps1/Aco1/Tpi1/Rpe/Phgdh/Pcx	mmu:11674/mmu:56421/mmu:21881/mmu:67834/mmu:108682/mmu:107272/mmu:76282/mmu:15926/mmu:107869/mmu:18648/mmu:12974/mmu:21351/mmu:19139/mmu:11428/mmu:21991/mmu:66646/mmu:236539/mmu:18563	18
mmu00100	Steroid biosynthesis	9|508	19|6388	5.31452e-06	0.000526137	ENSMUSG00000058454/ENSMUSG00000001467/ENSMUSG00000033105/ENSMUSG00000034926/ENSMUSG00000031349/ENSMUSG00000032018/ENSMUSG00000026675/ENSMUSG00000022351/ENSMUSG00000021273	Dhcr7/Cyp51/Lss/Dhcr24/Nsdhl/Sc5d/Hsd17b7/Sqle/Fdft1	mmu:13360/mmu:13121/mmu:16987/mmu:74754/mmu:18194/mmu:235293/mmu:15490/mmu:20775/mmu:14137	9
mmu00020	Citrate cycle (TCA cycle)	10|508	29|6388	4.63997e-05	0.00332477	ENSMUSG00000021748/ENSMUSG00000000168/ENSMUSG00000032279/ENSMUSG00000020917/ENSMUSG00000025950/ENSMUSG00000020664/ENSMUSG00000005683/ENSMUSG00000022110/ENSMUSG00000028405/ENSMUSG00000024892	Pdhb/Dlat/Idh3a/Acly/Idh1/Dld/Cs/Sucla2/Aco1/Pcx	mmu:68263/mmu:235339/mmu:67834/mmu:104112/mmu:15926/mmu:13382/mmu:12974/mmu:20916/mmu:11428/mmu:18563	10
mmu04152	AMPK signaling pathway	23|508	120|6388	5.59726e-05	0.00332477	ENSMUSG00000030244/ENSMUSG00000019699/ENSMUSG00000025203/ENSMUSG00000021196/ENSMUSG00000025153/ENSMUSG00000020532/ENSMUSG00000028518/ENSMUSG00000026773/ENSMUSG00000032462/ENSMUSG00000022052/ENSMUSG00000020538/ENSMUSG00000006542/ENSMUSG00000020349/ENSMUSG00000024122/ENSMUSG00000025583/ENSMUSG00000037071/ENSMUSG00000005534/ENSMUSG00000029471/ENSMUSG00000026626/ENSMUSG00000021670/ENSMUSG00000000440/…	Gys2/Akt3/Scd2/Pfkp/Fasn/Acaca/Prkaa2/Pfkfb3/Pik3cb/Ppp2r2a/Srebf1/Prkag3/Ppp2ca/Pdpk1/Rptor/Scd1/Insr/Camkk2/Ppp2r5a/Hmgcr/Pparg/Pfkfb1/Ppp2r5d	mmu:232493/mmu:23797/mmu:20250/mmu:56421/mmu:14104/mmu:107476/mmu:108079/mmu:170768/mmu:74769/mmu:71978/mmu:20787/mmu:241113/mmu:19052/mmu:18607/mmu:74370/mmu:20249/mmu:16337/mmu:207565/mmu:226849/mmu:15357/mmu:19016/mmu:18639/mmu:21770	23
mmu00062	Fatty acid elongation	10|508	31|6388	8.88236e-05	0.00439677	ENSMUSG00000028145/ENSMUSG00000041220/ENSMUSG00000032349/ENSMUSG00000038754/ENSMUSG00000032262/ENSMUSG00000052392/ENSMUSG00000027984/ENSMUSG00000031708/ENSMUSG00000028937/ENSMUSG00000027195	Them4/Elovl6/Elovl5/Elovl3/Elovl4/Acot4/Hadh/Tecr/Acot7/Hsd17b12	mmu:75778/mmu:170439/mmu:68801/mmu:12686/mmu:83603/mmu:171282/mmu:15107/mmu:106529/mmu:70025/mmu:56348	10
mmu00620	Pyruvate metabolism	10|508	35|6388	0.000274954	0.0116659	ENSMUSG00000027605/ENSMUSG00000021748/ENSMUSG00000032418/ENSMUSG00000000168/ENSMUSG00000020532/ENSMUSG00000020664/ENSMUSG00000029455/ENSMUSG00000023832/ENSMUSG00000030246/ENSMUSG00000024892	Acss2/Pdhb/Me1/Dlat/Acaca/Dld/Aldh2/Acat2/Ldhb/Pcx	mmu:60525/mmu:68263/mmu:17436/mmu:235339/mmu:107476/mmu:13382/mmu:11669/mmu:110460/mmu:16832/mmu:18563	10
mmu01212	Fatty acid metabolism	12|508	51|6388	0.000503141	0.0186791	ENSMUSG00000025203/ENSMUSG00000025153/ENSMUSG00000020532/ENSMUSG00000041220/ENSMUSG00000032349/ENSMUSG00000018796/ENSMUSG00000026003/ENSMUSG00000023832/ENSMUSG00000037071/ENSMUSG00000027984/ENSMUSG00000031708/ENSMUSG00000027195	Scd2/Fasn/Acaca/Elovl6/Elovl5/Acsl1/Acadl/Acat2/Scd1/Hadh/Tecr/Hsd17b12	mmu:20250/mmu:14104/mmu:107476/mmu:170439/mmu:68801/mmu:14081/mmu:11363/mmu:110460/mmu:20249/mmu:15107/mmu:106529/mmu:56348	12
mmu01210	2-Oxocarboxylic acid metabolism	6|508	16|6388	0.000985227	0.0325125	ENSMUSG00000032279/ENSMUSG00000031700/ENSMUSG00000022546/ENSMUSG00000025950/ENSMUSG00000005683/ENSMUSG00000028405	Idh3a/Gpt2/Gpt/Idh1/Cs/Aco1	mmu:67834/mmu:108682/mmu:76282/mmu:15926/mmu:12974/mmu:11428	6
mmu01040	Biosynthesis of unsaturated fatty acids	8|508	28|6388	0.00112856	0.0335184	ENSMUSG00000025203/ENSMUSG00000041220/ENSMUSG00000032349/ENSMUSG00000037071/ENSMUSG00000052392/ENSMUSG00000031708/ENSMUSG00000028937/ENSMUSG00000027195	Scd2/Elovl6/Elovl5/Scd1/Acot4/Tecr/Acot7/Hsd17b12	mmu:20250/mmu:170439/mmu:68801/mmu:20249/mmu:171282/mmu:106529/mmu:70025/mmu:56348	8
mmu00562	Inositol phosphate metabolism	14|508	72|6388	0.00136151	0.0367608	ENSMUSG00000066324/ENSMUSG00000041720/ENSMUSG00000025240/ENSMUSG00000032462/ENSMUSG00000029186/ENSMUSG00000057963/ENSMUSG00000026447/ENSMUSG00000038855/ENSMUSG00000029055/ENSMUSG00000010660/ENSMUSG00000051177/ENSMUSG00000023456/ENSMUSG00000039431/ENSMUSG00000034902	Impad1/Pi4ka/Sacm1l/Pik3cb/Pi4k2b/Itpk1/Pik3c2b/Itpkb/Plch2/Plcd1/Plcb1/Tpi1/Mtmr7/Pip5k1c	mmu:242291/mmu:224020/mmu:83493/mmu:74769/mmu:67073/mmu:217837/mmu:240752/mmu:320404/mmu:269615/mmu:18799/mmu:18795/mmu:21991/mmu:54384/mmu:18717	14
mmu00640	Propanoate metabolism	8|508	30|6388	0.00184464	0.0421429	ENSMUSG00000027605/ENSMUSG00000020532/ENSMUSG00000020664/ENSMUSG00000023832/ENSMUSG00000022110/ENSMUSG00000019883/ENSMUSG00000033429/ENSMUSG00000030246	Acss2/Acaca/Dld/Acat2/Sucla2/Echdc1/Mcee/Ldhb	mmu:60525/mmu:107476/mmu:13382/mmu:110460/mmu:20916/mmu:52665/mmu:73724/mmu:16832	8
mmu04710	Circadian rhythm	8|508	30|6388	0.00184464	0.0421429	ENSMUSG00000020889/ENSMUSG00000030103/ENSMUSG00000028518/ENSMUSG00000022433/ENSMUSG00000006542/ENSMUSG00000028957/ENSMUSG00000022124/ENSMUSG00000032238	Nr1d1/Bhlhe40/Prkaa2/Csnk1e/Prkag3/Per3/Fbxl3/Rora	mmu:217166/mmu:20893/mmu:108079/mmu:27373/mmu:241113/mmu:18628/mmu:50789/mmu:19883	8

## Sheet: BAT KEGG WT Up
KEGGID	Description	GeneRatio	BgRatio	pvalue	padj	geneID	geneName	keggID	Count
mmu03010	Ribosome	63|520	133|6244	8.27307e-34	2.49847e-31	ENSMUSG00000063457/ENSMUSG00000067288/ENSMUSG00000012848/ENSMUSG00000008668/ENSMUSG00000041841/ENSMUSG00000025508/ENSMUSG00000090733/ENSMUSG00000034892/ENSMUSG00000028234/ENSMUSG00000049517/ENSMUSG00000037805/ENSMUSG00000057322/ENSMUSG00000037563/ENSMUSG00000028936/ENSMUSG00000062997/ENSMUSG00000046364/ENSMUSG00000006333/ENSMUSG00000058600/ENSMUSG00000046330/ENSMUSG00000003429/ENSMUSG00000030432/…	Rps15/Rps28/Rps5/Rps18/Rpl37/Rplp2/Rps27/Rps29/Rps20/Rps23/Rpl10a/Rpl38/Rps16/Rpl22/Rpl35/Rpl27a/Rps9/Rpl30/Rpl37a/Rps11/Rpl28/Rps2/Rpl19/Rpl9/Rps6/Rpl23/Rps3/Mrpl23/Rpl18/Rpl18a/Rpl41/Rplp0/Rps12/Rps27a/Rps17/Rpl5/Rpl26/Rplp1/Rps3a1/Rps13/Rps8/Fau/Rpl17/Rpl8/Rpl32/Rpl29/Mrps18a/Rpl7a/Rpl36a/Rps21/Rpl11/Rpl14/Rps19/Rpl21/Rpl39l/Mrps21/Mrps16/Rpl23a/Rpl22l1/Rpl13/Rpl10/Rpl36/Mrps12	mmu:20054/mmu:54127/mmu:20103/mmu:20084/mmu:100502825/mmu:67186/mmu:57294/mmu:20090/mmu:67427/mmu:66475/mmu:19896/mmu:67671/mmu:20055/mmu:19934/mmu:66489/mmu:26451/mmu:76846/mmu:19946/mmu:19981/mmu:27207/mmu:19943/mmu:16898/mmu:19921/mmu:20005/mmu:20104/mmu:100044627/mmu:27050/mmu:19935/mmu:19899/mmu:76808/mmu:67945/mmu:11837/mmu:20042/mmu:78294/mmu:20068/mmu:100503670/mmu:19941/mmu:56040/mmu:200…	63
mmu03320	PPAR signaling pathway	19|520	75|6244	7.6873e-06	0.00116078	ENSMUSG00000020777/ENSMUSG00000028773/ENSMUSG00000015568/ENSMUSG00000002108/ENSMUSG00000011305/ENSMUSG00000031808/ENSMUSG00000027513/ENSMUSG00000066072/ENSMUSG00000062515/ENSMUSG00000002944/ENSMUSG00000022853/ENSMUSG00000015846/ENSMUSG00000028715/ENSMUSG00000078937/ENSMUSG00000028603/ENSMUSG00000025059/ENSMUSG00000027875/ENSMUSG00000028607/ENSMUSG00000028494	Acox1/Fabp3/Lpl/Nr1h3/Plin5/Slc27a1/Pck1/Cyp4a10/Fabp4/Cd36/Ehhadh/Rxra/Cyp4a14/Cpt1b/Scp2/Gk/Hmgcs2/Cpt2/Plin2	mmu:11430/mmu:14077/mmu:16956/mmu:22259/mmu:66968/mmu:26457/mmu:18534/mmu:13117/mmu:11770/mmu:12491/mmu:74147/mmu:20181/mmu:13119/mmu:12895/mmu:20280/mmu:14933/mmu:15360/mmu:12896/mmu:11520	19
mmu04146	Peroxisome	17|520	81|6244	0.000287259	0.0289174	ENSMUSG00000024066/ENSMUSG00000022040/ENSMUSG00000020777/ENSMUSG00000022210/ENSMUSG00000026853/ENSMUSG00000027187/ENSMUSG00000029864/ENSMUSG00000022853/ENSMUSG00000035559/ENSMUSG00000021417/ENSMUSG00000022982/ENSMUSG00000074064/ENSMUSG00000028603/ENSMUSG00000053898/ENSMUSG00000017307/ENSMUSG00000002763/ENSMUSG00000063428	Xdh/Ephx2/Acox1/Dhrs4/Crat/Cat/Gstk1/Ehhadh/Mpv17l2/Eci2/Sod1/Mlycd/Scp2/Ech1/Acot8/Pex6/Ddo	mmu:22436/mmu:13850/mmu:11430/mmu:28200/mmu:12908/mmu:12359/mmu:76263/mmu:74147/mmu:234384/mmu:23986/mmu:20655/mmu:56690/mmu:20280/mmu:51798/mmu:170789/mmu:224824/mmu:70503	17

[truncated: 43 more sheets: BAT KEGG WT Down, SkMuscle GO WT Up, SkMuscle GO WT Down, Liver GO WT Up, Liver GO WT Down, iWAT GO WT Down, Hypothalamus GO WT Up, Hypothalamus GO WT Down, eWAT GO WT Up, eWAT GO WT Down, BAT GO WT Up, BAT GO WT Down, SkMuscle Reactome WT Up, SkMuscle Reactome WT Down, Liver Reactome WT Up, Liver Reactome WT Down, iWAT Reactome WT Down, Hypothalamus Reactome WT Down, eWAT Reactome WT Up, eWAT Reactome WT DOwn …]
